# Supplementary material for: A β-catenin-driven switch in TCF/LEF transcription factor binding to DNA target sites promotes commitment of mammalian nephron progenitor cells
Source: eLife journal article supplement (doi:10.7554/elife.64444), 2021-02-15

Fig. 1S1

A

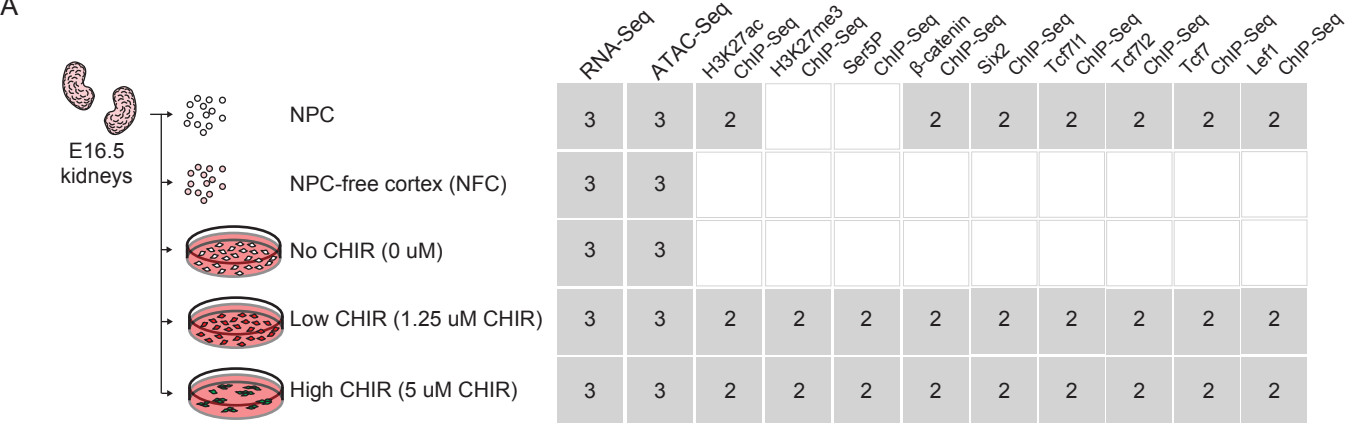

B

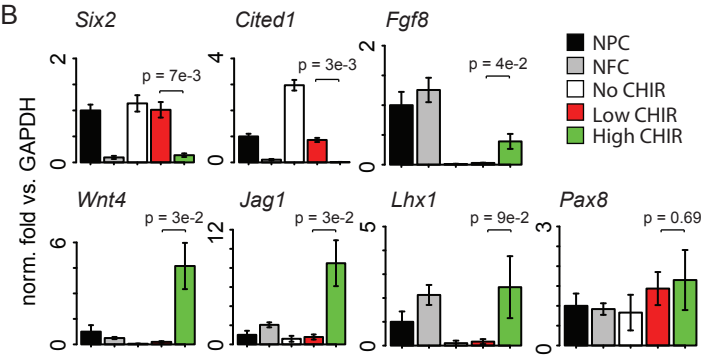

C

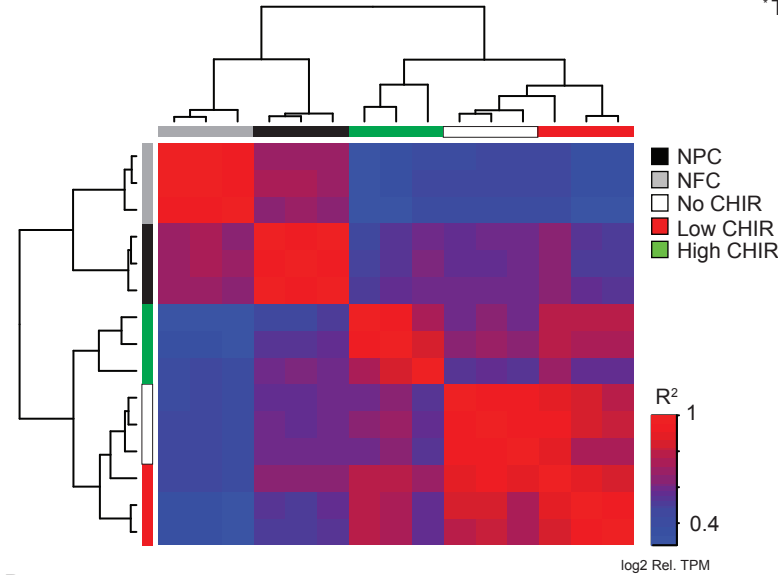

D

| GO terms                                                             | #  | p-adj   | F.E. |
|----------------------------------------------------------------------|----|---------|------|
| <b>Low CHIR &gt; NPC (511 transcripts)</b>                           |    |         |      |
| sterol biosynthetic process                                          | 16 | 3.0E-15 | 29.1 |
| cholesterol biosynthetic process                                     | 16 | 1.5E-14 | 24.6 |
| steroid metabolic process                                            | 17 | 8.9E-9  | 9.9  |
| lipid metabolic process                                              | 35 | 4.9E-8  | 3.7  |
| steroid biosynthetic process                                         | 14 | 1.3E-7  | 11.1 |
| <b>NPC &gt; Low CHIR (283 transcripts)</b>                           |    |         |      |
| response to mechanical stimulus                                      | 11 | 6.7E-6  | 14.3 |
| multicellular organism development                                   | 34 | 1.7E-4  | 2.7  |
| skeletal muscle cell differentiation                                 | 9  | 1.7E-4  | 13.4 |
| positive regulation of transcription from RNA polymerase II promoter | 32 | 5.2E-4  | 2.6  |
| positive regulation of transcription, DNA-templated                  | 23 | 6.9E-4  | 3.3  |

E

| GO terms                                        | #  | p-adj   | F.E. |
|-------------------------------------------------|----|---------|------|
| <b>Low CHIR &gt; No CHIR (405 transcripts*)</b> |    |         |      |
| cell cycle                                      | 95 | 2.1E-61 | 9.2  |
| cell division                                   | 75 | 1.1E-55 | 12.0 |
| mitotic nuclear division                        | 66 | 1.3E-53 | 14.2 |
| chromosome segregation                          | 27 | 6.6E-23 | 18.1 |
| DNA replication                                 | 26 | 8.1E-18 | 12.6 |
| <b>No CHIR &gt; Low CHIR (201 transcripts*)</b> |    |         |      |
| organ regeneration                              | 7  | 1.3E-2  | 14.0 |
| cell adhesion                                   | 16 | 1.8E-2  | 3.7  |
| skeletal system morphogenesis                   | 6  | 4.9E-2  | 12.5 |
| response to estradiol                           | 7  | 9.0E-2  | 7.8  |
| positive regulation of apoptotic process        | 9  | 2.1E-1  | 3.7  |

\*These DE transcripts were identified with a different DE threshold (Table S1).

F

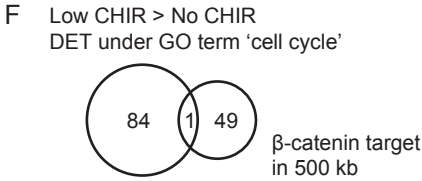

G

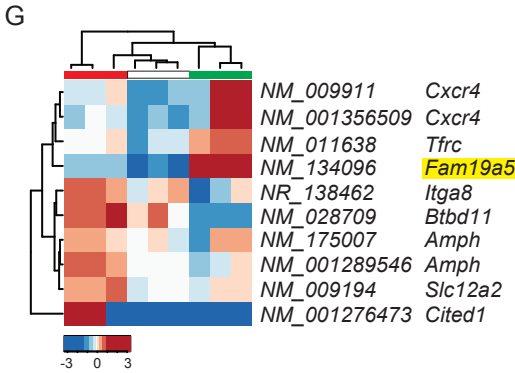

H

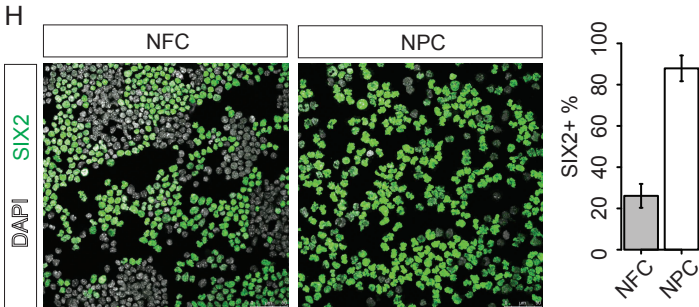

Supplement: supp [file elife_poa_e64444_Figure_1_figure_supplement_1.pdf › elife_poa_e64444_Figure_1_figure_supplement_1.pdf]
