# Supplementary material for: A β-catenin-driven switch in TCF/LEF transcription factor binding to DNA target sites promotes commitment of mammalian nephron progenitor cells
Source: eLife. 2021 Feb 15;10:e64444. doi: 10.7554/eLife.64444 (PMC7924951; doi:10.7554/eLife.64444)
Supplement: Supplementary file 1. [file elife-64444-supp1.xlsx]

## Sheet: Notes
This table is related to Fig. 1C-D, S1, 3A, S3B
Differentially expressed transcripts threshold
other	3-1 and 3-2
log2Fc > log2(3)	log2Fc > 1
P-adj < 0.05	P-adj < 0.05
mean TPM > 5	mean TPM > 5
Column names annotations
TranscriptID	transcript ID
GeneSymbol	corresponding gene symbol
log2Fc.1	log2 fold change of contrast: NPC-NFC
nlog10P.1	negative log10 adjusted p value of contrast: NPC-NFC
log2Fc.2	log2 fold change of contrast: NPC(1.25uM CHIR) - NPC(5uM CHIR)
nlog10P.2	negative log10 adjusted p value of contrast: NPC(1.25uM CHIR) - NPC(5uM CHIR)
log2Fc.3	log2 fold change of contrast: NPC(1.25uM CHIR) - NPC(0uM CHIR)
nlog10P.3	negative log10 adjusted p value of contrast: NPC(1.25uM CHIR) - NPC(0uM CHIR)
log2Fc.4	log2 fold change of contrast: NPC(1.25uM CHIR) - NPC
nlog10P.4	negative log10 adjusted p value of contrast: NPC(1.25uM CHIR) - NPC
meanTPM.NPC	mean TPM of NPC samples
meanTPM.NFC	mean TPM of NFC samples
meanTPM.NPC_0uM	mean TPM of NPC(0uM CHIR) samples
meanTPM.NPC_1.25uM	mean TPM of NPC(1.25uM CHIR) samples
meanTPM.NPC_5uM	mean TPM of NPC(5uM CHIR) samples
Sheet 0 shows all transcripts regardless of differential expression; sheet 5 shows TPM of each transcript in individual samples; other sheets display DE transcripts of the correponding comparisons and direction of change.
Each sheet except for sheet 0 and sheet 5 are generated based on the highlighted columns, and are ranked based on the negative log adjusted p-values.

## Sheet: 0 all
TranscriptID	GeneSymbol	log2Fc.1	nlog10P.1	log2Fc.2	nlog10P.2	log2Fc.3	nlog10P.3	log2Fc.4	nlog10P.4	meanTPM.NPC	meanTPM.NFC	meanTPM.NPC_0uM	meanTPM.NPC_1.25uM	meanTPM.NPC_5uM
NM_001001130	Zfp85	0.149	0.207	0.084	0.045	0.113	0.097	0.403	0.95	3.006	2.556	3.831	3.91	3.457
NM_001001144	Scap	0.057	0.117	-0.43	0.384	-0.583	1.144	-0.349	0.598	11.744	10.631	14.287	9.031	11.41
NM_001001152	Zfp458	0.456	1.173	0.29	0.219	0.303	0.29	0.126	0.119	2.195	1.503	2.014	2.355	1.797
NM_001001160	Fbxo41	-0.006	0.001	0.114	NA	-3.169	NA	-1.84	NA	0.011	0.011	0.029	0.003	0.003
NM_001001176	Taf9b	-0.437	0.312	1.243	2.223	-0.093	0.064	0.869	0.985	0.649	0.825	1.309	1.16	0.456
NM_001001177	BC051142	0.278	0.091	1.005	0.313	0.603	0.155	0.3	0.101	0.315	0.237	0.269	0.382	0.173
NM_001001178	Ccdc148	0.25	0.045	2.54	0.528	-0.039	0.006	-0.458	0.09	0.105	0.085	0.078	0.073	0.012
NM_001001179	A2ml1	0.955	0.17	-3.585	2.087	0.544	NA	-1.471	0.348	0.032	0.016	0.008	0.011	0.124
NM_001001180	Zfp941	0.775	2.2	-0.267	0.22	0.003	0.002	-0.111	0.109	1.216	0.668	1.164	1.108	1.245
NM_001001181	BC031181	0.452	3.489	-0.008	0.003	-0.501	0.89	-0.11	0.126	29.3	20.12	39.693	26.539	25.036
NM_001001182	Baz2b	0.32	2.239	0.132	0.109	-0.053	0.049	0.272	0.573	13.459	10.144	17.451	15.971	13.581
NM_001001183	Tmem204	-3.087	46.923	-1.172	0.262	-0.9	0.204	-3.216	4.034	0.876	6.961	0.179	0.093	0.195
NM_001001184	Primpol	-0.293	1.457	0.261	0.374	-0.049	0.05	-0.497	2.031	4.174	4.815	3.168	2.908	2.268
NM_001001185	BC048507	-0.629	NA	-0.582	NA	1.712	NA	-0.377	NA	0.071	0.099	0.017	0.055	0.075
NM_001001186	Zfp456	0.4	0.379	0.022	0.008	-0.157	0.111	-0.115	0.091	0.632	0.457	0.672	0.574	0.531
NM_001001187	Zfp738	0.459	2.887	0.218	0.201	0.22	0.325	0.181	0.378	6.522	4.463	6.592	7.266	5.84
NM_001001295	Dis3l	-0.21	0.92	-0.076	0.035	-0.492	0.746	-0.64	1.721	9.216	10.029	8.578	5.788	5.742
NM_001001297	Thnsl1	NA	NA	NA	NA	-3.188	NA	NA	NA	0	0	0.022	0	0
NM_001001309	Itga8	1.069	15.459	1.175	1.168	0.091	0.209	1.506	21.771	46.052	20.588	127.038	128.365	53.566
NM_001001319	Pramel4	NA	NA	NA	NA	NA	NA	NA	NA	0.002	0.001	0.002	0.003	0.003
NM_001001320	Tbx10	4.287	2.812	NA	NA	NA	NA	-6.982	4.626	0.414	0.021	0	0	0
NM_001001321	Slc35d2	-0.22	0.25	0.554	0.251	-1.234	2.812	-0.464	0.533	1.202	1.321	2.107	0.859	0.537
NM_001001322	Adamts13	4.186	NA	NA	NA	NA	NA	-4.027	NA	0.019	0	0.001	0.001	0
NM_001001326	St5	-0.302	2.689	0.651	3.199	0.084	0.137	0.105	0.232	8.404	9.736	8.822	8.889	5.281
NM_001001327	Vkorc1l1	0.282	0.299	-0.619	1.179	-0.176	0.168	0.142	0.123	1.747	1.334	2.25	1.89	2.708
NM_001001332	BC117090	4.807	1.145	NA	NA	-1.67	NA	-4.647	1.021	0.376	0	0.049	0	0
NM_001001333	Hexdc	0.765	3.95	0.042	0.022	-0.482	0.923	-1.203	7.764	6.908	3.818	4.31	2.952	2.673
NM_001001334	Spag6	-0.089	NA	0.489	NA	-0.146	NA	-0.059	NA	0.027	0.027	0.03	0.025	0.017
NM_001001335	Plekha8	-0.124	0.112	0.288	0.14	0.422	0.367	1.001	2.174	1.017	1.036	1.584	2.001	1.533
NM_001001444	Defb29	-0.876	NA	1.63	NA	2.659	NA	1.671	NA	0.019	0.046	0	0.08	0.023
NM_001001445	Trpv1	0.785	NA	1.58	NA	0.14	NA	0.834	NA	0.005	0.003	0.008	0.009	0.003
NM_001001446	Cyp2c23	NA	NA	1.074	NA	1.141	NA	1.107	NA	0	0	0	0.006	0
NM_001001447	Zscan22	-0.222	0.176	0.133	0.035	0.269	0.119	0.019	0.008	0.971	1.076	0.844	0.968	0.82
NM_001001449	AF067063	NA	NA	NA	NA	NA	NA	NA	NA	0	0	0	0	0
NM_001001450	Ssxb2	-0.149	NA	NA	NA	-2.605	NA	-2.888	NA	0.046	0.046	0.032	0	0
NM_001001451	Tas2r138	NA	NA	NA	NA	NA	NA	NA	NA	0	0	0	0	0
NM_001001452	Tas2r143	0.976	NA	0.971	NA	1.999	NA	1.003	NA	0.013	0	0	0.023	0.012
NM_001001453	Tas2r144	NA	NA	NA	NA	NA	NA	NA	NA	0	0	0	0	0
NM_001001454	Ttyh1	1.818	NA	-2.842	NA	NA	NA	-2.619	NA	0.011	0.004	0	0.001	0.012
NM_001001488	Atp8b1	-2.946	7.975	0.323	0.066	-0.916	0.544	0.493	0.195	0.05	0.358	0.135	0.068	0.05
NM_001001489	Mfsd4b5	0.701	0.093	0.995	NA	4.246	NA	-0.775	0.079	0.07	0.043	0	0.044	0.02
NM_001001490	Oxgr1	-1.319	0.26	NA	NA	NA	NA	-3.339	NA	0.016	0.039	0	0	0
NM_001001491	Tpm4	-1.21	118.629	0.111	0.19	0.054	0.142	0.751	20.895	162.89	354.287	273.298	269.215	232.544
NM_001001492	Lca5l	-0.027	0.016	0.371	0.122	-0.704	0.523	-1.177	1.682	0.65	0.619	0.483	0.28	0.204
NM_001001493	Wdr83os	-0.024	0.054	0.025	0.014	0.586	1.745	-0.21	0.423	40.965	39.11	24.317	34.878	31.871
NM_001001495	Tnip3	0.976	NA	2.608	NA	-0.479	NA	1.683	NA	0.003	0	0.012	0.009	0
NM_001001496	Gja6	-0.511	0.118	-2.182	NA	-1.537	NA	-1.731	0.364	0.068	0.093	0.063	0.02	0.085
NM_001001559	Usp17ld	NA	NA	NA	NA	NA	NA	NA	NA	0	0	0	0	0
NM_001001565	Chpf	-0.443	0.678	0.135	0.026	-0.482	0.186	-0.266	0.123	1.246	1.604	1.503	1.003	0.858
NM_001001566	Chpf	-1.222	21.251	-0.098	0.062	-0.607	1.897	0.503	1.599	10.075	22.099	22.44	14.014	14.032
NM_001001602	Dab2ip	0.79	0.646	-0.634	0.197	-0.526	0.18	-1.09	0.787	0.261	0.143	0.181	0.122	0.175
NM_001001650	Prss48	3.412	1.048	0.076	0.009	0.329	0.065	0.474	0.134	0.213	0.02	0.248	0.292	0.262
NM_001001714	Sohlh1	NA	NA	1.856	NA	1.923	NA	1.88	NA	0	0	0	0.014	0
NM_001001735	Nsd3	-0.103	0.226	0.056	0.052	-0.144	0.177	-0.28	0.805	7.685	7.786	7.186	6.219	5.6
NM_001001737	Zfp950	0.15	0.141	0.467	0.564	0.203	0.149	0.731	1.524	1.788	1.51	2.69	2.904	1.971
NM_001001738	Itprip	-0.953	14.316	-0.114	0.056	-1.288	10.258	-0.318	0.803	7.181	13.064	14.505	5.646	5.692
NM_001001792	Zfp239	0.152	0.156	0.166	0.09	1.156	2.925	-0.254	0.304	2.112	1.782	0.817	1.74	1.443
NM_001001796	Prrxl1	2.574	NA	1.932	NA	1.038	NA	-0.581	NA	0.02	0	0.005	0.013	0
NM_001001798	Atp11c	-0.443	1.212	-0.599	0.729	1.047	1.619	-0.754	1.382	2.728	3.486	0.814	1.588	2.241
NM_001001803	Spink7	NA	NA	1.074	NA	1.141	NA	1.107	NA	0	0	0	0.043	0
NM_001001804	Ephx4	1.355	1.113	0.701	0.163	-0.466	0.163	-0.954	0.617	0.655	0.239	0.484	0.329	0.193
NM_001001805	Olfr576	NA	NA	NA	NA	NA	NA	NA	NA	0	0	0	0	0
NM_001001806	Zfp36l2	-0.092	0.231	-0.244	0.666	0.151	0.367	-0.84	13.209	47.549	47.458	24.797	26.065	28.871
NM_001001807	Olfr279	NA	NA	NA	NA	NA	NA	NA	NA	0	0	0	0	0
NM_001001808	Olfr221	NA	NA	-0.849	NA	-0.782	NA	NA	NA	0	0	0.011	0	0.01
NM_001001809	Olfr218	NA	NA	NA	NA	NA	NA	NA	NA	0	0	0	0	0
NM_001001810	Olfr1206	NA	NA	NA	NA	NA	NA	NA	NA	0	0	0	0	0
NM_001001880	Mpzl1	0.945	2.815	-1.285	3.797	-0.456	0.754	0.148	0.185	12.409	5.973	19.455	13.454	30.873
NM_001001881	2510009E07Rik	-1.42	44.873	2.279	29.385	-0.252	0.569	0.946	9.32	4.793	12.051	11.412	9.078	1.739
NM_001001882	Rtel1	-0.057	0.117	-0.204	0.117	0.551	0.528	-1.072	3.96	4.848	4.749	1.643	2.27	2.434
NM_001001883	Hecw2	-2.402	9.601	-0.363	0.094	-0.178	0.079	0.531	0.381	0.086	0.433	0.145	0.122	0.144
NM_001001884	Nckap5l	-0.701	10.236	-0.544	1.149	-0.383	1.257	0.32	1.426	6.564	10.046	10.995	8.041	10.93
NM_001001885	Tmem151a	3.246	1.685	-0.601	0.216	-1.539	2.772	1.519	1.423	0.091	0.009	0.775	0.257	0.358
NM_001001892	H2-K1	-0.546	1.09	-0.262	0.08	-0.348	0.175	2.007	4.963	3.845	5.32	20.759	15.082	17.095
NM_001001932	Eea1	-0.459	3.868	0.603	2.049	0.126	0.17	1.139	11.169	6.688	8.652	13.997	14.465	8.888
NM_001001979	Megf10	1.66	6.526	-0.278	0.283	0.05	0.023	0.69	1.947	0.519	0.154	0.843	0.823	0.936
NM_001001980	Limch1	1.362	22.054	2.204	18.192	-0.498	1.656	0.977	9.494	9.695	3.537	27.807	18.741	3.799
NM_001001981	Utp14b	1.586	21.94	-0.289	0.485	0.124	0.202	-0.595	2.809	11.444	3.597	7.155	7.438	8.457
NM_001001982	Ccdc9b	-1.006	1.248	-0.041	0.01	-0.918	0.985	0.329	0.204	0.181	0.346	0.442	0.225	0.213
NM_001001983	Pi4ka	-0.021	0.047	0.472	3.04	-0.161	0.551	-0.083	0.258	15.375	14.631	16.755	14.256	9.592
NM_001001984	Kdm2a	0.202	1.993	0.043	0.034	0.213	0.482	-0.022	0.034	31.61	25.833	27.786	30.608	27.706
NM_001001985	Nat8l	1.358	4.533	-0.698	0.201	-0.067	0.016	-3.169	15.613	0.734	0.267	0.088	0.079	0.123
NM_001001986	Nol4l	1.163	25.365	0.001	0.001	0.137	0.221	0.453	1.929	11.718	4.932	15.032	15.761	14.678
NM_001001999	Gp1bb	-0.338	0.022	-4.35	NA	-3.963	NA	-3.526	NA	0.033	0.039	0.045	0	0.053
NM_001002004	2610507B11Rik	0.069	0.335	0.176	0.539	-0.046	0.109	0.017	0.04	41.163	36.877	44.476	40.893	33.82
NM_001002005	Panx2	-0.447	0.161	0	NA	-0.044	NA	-1.33	0.487	0.087	0.112	0.038	0.034	0.032
NM_001002008	Zfp948	-0.663	3.756	0.593	1.477	0.49	1.465	0.799	5.564	8.573	12.837	11.019	14.65	9.089
NM_001002011	Lmna	-0.712	2.156	0.424	0.468	-0.708	2.707	0.483	0.85	9.171	14.088	21.579	12.546	8.727
NM_001002012	Hspa2	-0.662	0.152	2.243	2.378	1.172	0.579	3.215	2.747	0.092	0.14	0.385	0.853	0.164
NM_001002238	Tdrd1	0.198	0.069	-1.157	NA	0.419	NA	-4.563	4.812	0.299	0.249	0.009	0.011	0.027
NM_001002239	Rpl17	0.386	6.001	-0.126	0.276	0.238	0.515	-0.016	0.045	1148.69	824.597	989.953	1115.27	1137.59
NM_001002240	Tdrd1	0.623	0.138	-1.801	NA	0.134	NA	-3.358	1.515	0.108	0.063	0.012	0.011	0.035
NM_001002241	Tdrd1	0.442	NA	-0.849	NA	NA	NA	-2.095	NA	0.005	0.003	0.001	0.001	0.002
NM_001002267	Tmem158	-0.835	2.819	-0.822	1.234	0.445	0.3	-0.918	1.703	2.557	4.288	1.02	1.325	2.201
NM_001002268	Adgrg6	-2.611	42.022	1.229	3.886	-0.077	0.049	0.496	0.802	0.683	3.916	1.053	0.947	0.379
NM_001002272	Tro	-1.293	40.848	-0.658	1.205	-0.507	0.983	-1.266	7.713	5.776	13.319	3.53	2.346	3.48
NM_001002764	Smg6	-0.494	9.372	-0.004	0.003	0.252	0.614	-0.257	0.844	14.528	19.224	10.55	11.957	11.175
NM_001002786	Rab44	1.433	0.221	NA	NA	NA	NA	-4.709	1.061	0.038	0.013	0	0	0
NM_001002787	Ccin	-4.194	1.693	0.558	NA	-0.462	NA	2.765	0.475	0.009	0.159	0.092	0.064	0.04
NM_001002791	Defb22	NA	NA	NA	NA	NA	NA	NA	NA	0	0	0	0	0
NM_001002842	Pram1	-0.303	0.08	-0.544	0.048	-0.501	NA	-1.623	0.497	0.249	0.284	0.116	0.074	0.103
NM_001002846	Fbxl12	0.305	0.278	-0.038	0.003	-1.594	0.709	-2.534	2.272	2.159	1.659	1.178	0.358	0.346
NM_001002894	Nlrp14	NA	NA	-0.849	NA	NA	NA	NA	NA	0	0	0	0	0.002
NM_001002895	AI413582	-0.601	0.784	0.531	0.463	-0.583	0.672	1.724	4.853	2.497	3.534	12.636	8.037	5.219
NM_001002896	Bfsp2	-2.477	NA	-0.341	NA	-0.168	NA	2.66	NA	0	0.019	0.03	0.022	0.023
NM_001002897	Atg9b	-0.384	0.196	-1.585	1.74	-0.638	0.858	2.504	9.414	0.142	0.177	1.293	0.794	2.255
NM_001002898	Sirpb1a	-1.849	NA	NA	NA	NA	NA	-0.816	NA	0.008	0.029	0	0	0
NM_001002900	Higd1c	-0.354	NA	-3.514	NA	-0.782	NA	-2.305	NA	0.055	0.064	0.021	0	0.113
NM_001002927	Penk	-2.008	4.835	-1.509	NA	-3.622	NA	-5.994	6.534	1.441	5.503	0.287	0.027	0.054
NM_001002929	Nup85	0.01	0.024	-0.23	0.276	0.575	1.93	-0.39	1.273	35.629	33.318	18.882	26.654	29.291
NM_001003393	Igfl3	NA	NA	NA	NA	NA	NA	NA	NA	0	0	0	0	0
NM_001003405	Try5	-5.481	0.728	NA	NA	NA	NA	NA	NA	0	0.292	0	0	0
NM_001003664	Gm5409	NA	NA	NA	NA	NA	NA	NA	NA	0	0	0	0	0
NM_001003666	Zfp457	0.461	0.25	0.674	0.329	1.062	1.04	1.713	2.328	0.478	0.322	0.77	1.526	0.894
NM_001003667	Krt77	1.303	NA	-3.157	NA	1.133	NA	-1.073	NA	0.016	0.006	0.005	0.007	0.059
NM_001003668	Krt87	-1.881	NA	-1.731	NA	NA	NA	-0.816	NA	0.004	0.02	0	0	0.01
NM_001003670	Gm5414	NA	NA	-0.849	NA	NA	NA	NA	NA	0	0	0	0	0.006
NM_001003671	Pcdhac1	-1.485	NA	NA	NA	-0.782	NA	-0.816	NA	0.001	0.005	0.002	0	0
NM_001003672	Pcdhac2	-0.139	0.027	0.362	0.086	0.909	0.834	2.935	4.298	0.03	0.031	0.127	0.227	0.162
NM_001003685	Ghrhr	NA	NA	NA	NA	NA	NA	NA	NA	0	0	0	0	0
NM_001003717	Osbpl8	0.071	0.089	0.348	0.241	0.06	0.041	0.928	4.797	2.082	1.871	3.964	3.876	2.868
NM_001003719	Ralgapa1	0.77	3.542	0.746	0.388	0.079	0.046	-0.092	0.123	1.408	0.775	1.309	1.296	0.73
NM_001003817	Erbb2	0.169	1.226	-0.367	0.505	-0.655	4.89	-0.489	3.678	19.511	16.314	22.605	13.632	16.398
NM_001003824	Kcnq2	NA	NA	NA	NA	NA	NA	NA	NA	0.001	0	0	0	0
NM_001003825	Kcnq2	NA	NA	NA	NA	NA	NA	NA	NA	0.001	0.001	0	0	0
NM_001003893	Masp2	0.403	0.295	-0.085	0.01	-0.193	NA	-2.993	4.635	0.549	0.396	0.082	0.068	0.064
NM_001003898	Tardbp	-2.386	0.944	-0.226	0.019	-0.969	0.181	1.42	0.235	0.013	0.067	0.071	0.036	0.038
NM_001003899	Tardbp	-0.509	0.065	0.251	0.021	1.528	NA	0.708	0.096	0.022	0.032	0.015	0.037	0.028
NM_001003908	Cltc	-0.555	22.114	0.118	0.184	-0.214	0.732	0.815	20.314	44.488	61.489	94.187	76.885	66.276
NM_001003909	Ankib1	-0.082	0.119	0.015	0.011	-0.229	0.538	-0.116	0.169	3.566	3.57	3.985	3.241	2.992
NM_001003910	Ttc41	1.004	1.518	-0.275	0.118	0.175	0.074	-1.228	2.224	0.579	0.273	0.229	0.242	0.272
NM_001003911	Adamts7	-1.394	3.045	-1.598	0.788	-0.199	0.063	-2.626	4.733	0.923	2.285	0.175	0.15	0.418
NM_001003912	Arhgef11	0.111	0.211	0.254	0.238	-0.257	0.934	-0.191	0.425	4.89	4.249	5.302	4.203	3.283
NM_001003913	Mars	0.176	0.993	-0.518	2.426	-0.004	0.003	-0.221	0.782	29.287	24.382	25.923	24.664	33.101
NM_001003915	Slc5a12	-0.034	NA	NA	NA	-0.782	NA	-2.656	NA	0.007	0.007	0.003	0	0.001
NM_001003916	Zc4h2	-0.057	0.109	-0.221	0.315	-0.053	0.061	-0.226	0.55	10.171	9.935	9.312	8.516	9.287
NM_001003917	Atg9a	-0.562	1.3	0.171	0.102	-0.415	0.814	0.482	0.845	2.657	3.715	5.097	3.636	3.011
NM_001003918	Usp7	0.18	2.83	-0.075	0.074	0.367	1.366	0.064	0.145	41.383	34.328	34.753	42.506	41.824
NM_001003919	Ddx11	-1.012	3.113	-0.205	0.119	1.324	4.37	0.382	0.51	1.004	1.917	0.54	1.289	1.39
NM_001003920	Brsk1	0.334	2.51	-1.18	7.97	-0.426	0.944	-0.182	0.481	8.389	6.257	10.201	7.245	15.345
NM_001003933	Rtn3	1.316	3.317	0.144	0.071	0.174	0.113	-0.482	0.551	0.975	0.366	0.634	0.685	0.579
NM_001003934	Rtn3	1.28	2.46	-0.03	0.008	0.013	0.004	-0.7	0.617	0.575	0.221	0.361	0.348	0.33
NM_001003939	Ttc41	1.688	0.599	0.838	0.126	1.581	0.7	-0.121	0.039	0.248	0.073	0.082	0.219	0.117
NM_001003947	Cyp4x1	0.085	0.055	0.167	0.083	0.02	0.01	-0.324	0.297	0.814	0.725	0.661	0.639	0.531
NM_001003948	Pid1	-2.717	53.16	-0.703	0.419	0.012	0.004	-2.298	8.712	2.478	15.342	0.512	0.495	0.749
NM_001003949	Tmem259	-0.19	1.435	0.052	0.072	-0.049	0.066	0.783	14.481	22.031	23.626	40.335	37.185	33.558
NM_001003950	Rab3ip	0.737	0.484	-0.786	1.194	0.982	0.442	0.741	0.676	0.444	0.255	0.383	0.733	1.179
NM_001003951	Ces5a	-1.82	NA	-0.849	NA	NA	NA	NA	NA	0	0.009	0	0	0.004
NM_001003952	Sval3	NA	NA	NA	NA	NA	NA	NA	NA	0	0	0	0	0
NM_001003953	Kdm2b	0.886	10.318	-0.335	0.402	0.433	2.973	0.44	3.714	9.694	4.904	10.07	12.914	15.281
NM_001003955	Rab11fip5	-0.972	6.405	-0.706	3.935	-0.482	1.291	0.932	4.499	1.454	2.678	3.982	2.72	4.147
NM_001003960	Dnmt3b	-0.433	0.133	-0.01	0.001	1.676	NA	-1.358	0.802	0.198	0.261	0.027	0.075	0.068
NM_001003961	Dnmt3b	-2.561	0.69	1.295	NA	0.57	NA	0.561	NA	0.007	0.036	0.007	0.009	0.005
NM_001003963	Dnmt3b	-1.597	0.563	-0.617	NA	-1.497	NA	-1.654	0.291	0.023	0.066	0.023	0.007	0.01
NM_001003972	Senp7	NA	NA	-2.648	NA	1.141	NA	1.107	NA	0	0	0	0.009	0.053
NM_001003973	Senp7	0.565	0.997	0.377	0.367	0.351	0.469	0.334	0.541	2.885	1.823	2.946	3.574	2.577
NM_001004025	Ppp3r2	-2.112	0.455	0.881	NA	0.734	NA	-0.143	NA	0.012	0.049	0.007	0.01	0.005
NM_001004061	Fam170a	NA	NA	NA	NA	NA	NA	NA	NA	0	0	0	0	0
NM_001004062	Crtc1	-0.268	2.161	0.321	0.363	-0.279	0.644	-0.679	4.759	6.938	7.852	5.421	4.263	3.172
NM_001004066	Zfp386	0.861	3.568	-0.534	0.24	-0.043	0.013	-1.478	2.434	2.297	1.194	0.884	0.809	1.095
NM_001004139	Zfp619	0.278	0.866	0.385	0.525	-0.198	0.273	-0.877	5.553	2.603	2.017	1.689	1.392	0.993
NM_001004140	Ckap2	-0.591	5.983	-0.022	0.018	0.951	7.557	0.277	1.119	15.504	22.01	10.093	18.45	17.536
NM_001004141	Cyp2j11	-1.864	NA	NA	NA	NA	NA	NA	NA	0	0.01	0	0	0
NM_001004142	Nlrp1a	-1.512	0.63	0.112	NA	0.18	NA	-3.234	0.617	0.023	0.059	0.002	0.002	0.002
NM_001004143	Usp22	0.021	0.078	-0.141	0.281	-0.166	0.639	-0.167	0.918	56.385	52.209	58.258	49.291	50.762
NM_001004144	Git1	-0.426	6.363	-0.075	0.106	0.025	0.031	0.327	2.036	21.008	26.549	26.692	25.9	25.488
NM_001004145	Nlrp4g	NA	NA	NA	NA	NA	NA	NA	NA	0	0	0	0	0
NM_001004147	Fbll1	-2.417	NA	-2.114	NA	-2.652	NA	NA	NA	0	0.017	0.025	0	0.015
NM_001004148	Slc13a5	1.971	0.768	1.143	0.259	0.197	0.035	-0.184	0.044	0.091	0.022	0.07	0.079	0.034
NM_001004149	Zfp366	-6.197	5.623	-2.017	0.93	-0.24	0.041	3.653	1.16	0.006	0.467	0.099	0.082	0.308
NM_001004150	A4galt	-2.837	4.462	0.836	0.282	-0.65	0.348	2.632	3.127	0.128	0.877	1.289	0.77	0.415
NM_001004151	Rtp1	0.976	NA	-2.228	NA	-1.273	NA	0.145	NA	0.004	0	0.009	0.004	0.016
NM_001004152	Psg22	NA	NA	NA	NA	NA	NA	NA	NA	0	0	0	0	0
NM_001004153	AU018091	1.514	NA	-2.209	NA	-2.964	NA	-2.321	NA	0.008	0.003	0.013	0	0.007
NM_001004154	Rragb	2.601	24.304	-0.514	0.579	1.029	3.065	-0.546	1.874	6.094	0.934	2.132	4.088	5.496
NM_001004155	9930012K11Rik	-1.517	3.131	1.287	0.627	-0.895	0.845	0.127	0.057	0.6	1.629	1.258	0.651	0.242
NM_001004157	Scarf1	-1.233	3.017	1.081	1.982	-1.115	2.556	0.459	0.651	0.82	1.832	2.502	1.109	0.492
NM_001004158	Gm5142	NA	NA	NA	NA	NA	NA	NA	NA	0	0	0	0	0
NM_001004159	Clec4b2	NA	NA	NA	NA	NA	NA	NA	NA	0	0	0	0	0
NM_001004164	Gnptab	-0.104	0.344	-0.516	2.566	0.342	1.219	-0.104	0.256	5.492	5.538	4.159	5.024	6.71
NM_001004173	Sgpp2	-1.736	15.246	-0.21	0.079	0.825	0.742	0.66	1.088	1.114	3.467	1.025	1.72	1.879
NM_001004174	AA467197	1.746	NA	1.932	NA	1.038	NA	0.227	NA	0.027	0	0.016	0.031	0
NM_001004176	Maml3	0.479	4.201	0.46	1.103	0.031	0.036	0.77	5.425	8.147	5.483	14.016	13.654	9.268
NM_001004177	Celsr2	1.889	24.864	0.136	0.086	-0.704	2.663	0.095	0.145	5.928	1.498	10.644	6.198	5.309
NM_001004178	Frg2f1	0.369	0.278	-0.186	0.057	-0.377	0.221	-0.591	0.493	0.836	0.607	0.746	0.546	0.58
NM_001004180	Fam222a	-0.234	0.21	-2.547	6.014	-0.211	0.124	-1.894	5.418	2.462	2.74	0.793	0.651	3.524
NM_001004182	Tmem178b	-0.571	0.218	-1.338	NA	-4.213	NA	-5.043	2.092	0.038	0.052	0.021	0.001	0.003
NM_001004184	Slc28a1	-0.905	NA	-1.25	NA	1.596	NA	-0.023	NA	0.011	0.019	0.003	0.01	0.023
NM_001004185	Whamm	-0.177	0.21	0.121	0.084	0.105	0.101	0.162	0.168	2.386	2.551	2.563	2.632	2.255
NM_001004187	Rexo5	-0.31	0.357	-0.019	0.007	0.246	0.163	0.206	0.192	1.453	1.716	1.456	1.652	1.565
NM_001004190	Zfp560	0.087	0.196	0.123	0.123	0.012	0.008	-0.386	1.676	3.136	2.78	2.481	2.358	2.026
NM_001004191	Gm5617	0.36	0.471	0.307	0.169	-0.631	0.545	-0.645	1.01	6.276	4.568	6.32	3.917	2.982
NM_001004192	BC048562	NA	NA	NA	NA	NA	NA	NA	NA	0	0	0	0	0
NM_001004193	Rhox8	0.194	0.063	-0.687	0.23	0.911	0.416	-1.294	0.852	1.789	1.508	0.407	0.72	1.073
NM_001004194	Nlrp4e	NA	NA	NA	NA	NA	NA	NA	NA	0	0	0	0	0
NM_001004293	Amigo1	2.228	9.911	1.51	3.113	-0.161	0.164	-0.593	1.758	1.87	0.38	1.432	1.217	0.401
NM_001004357	Cntnap2	-2.496	2.982	1.856	NA	-0.543	NA	-3.498	0.993	0.032	0.172	0.005	0.002	0
NM_001004359	Gprasp1	-0.263	0.649	0.406	0.494	0.356	0.58	0.482	1.08	2.326	2.632	2.628	3.192	2.253
NM_001004361	Tpgs2	-0.594	4.412	0.018	0.009	-0.061	0.076	0.288	0.714	4.125	5.871	5.438	4.957	4.55
NM_001004362	2610008E11Rik	0.108	0.35	0.479	2.575	0.069	0.113	-0.269	1.312	10.014	8.752	8.216	8.159	5.464
NM_001004363	Nuak1	1.452	46.212	-0.187	0.089	0.856	3.727	1.516	27.611	17.341	5.942	28.35	48.623	52.14
NM_001004364	Asap2	0.467	6.346	0.252	0.373	0.249	0.521	1.286	14.406	9.273	6.304	19.698	22.226	17.388
NM_001004365	Actr3b	0.036	0.011	0.843	0.172	-0.61	0.688	-0.765	0.903	1.197	1.098	1.115	0.692	0.356
NM_001004366	Scube3	0.818	12.278	-2.785	10.033	-0.182	0.291	-1.03	9.085	16.541	8.81	9.503	7.945	50.773
NM_001004367	Cxxc4	1.024	11.78	1.866	0.984	-0.239	0.334	1.075	6.466	5.38	2.479	13.866	11.138	2.877
NM_001004435	Pik3r6	-2.901	1.426	1.074	NA	0.18	NA	-3.386	0.688	0.037	0.267	0.005	0.002	0.001
NM_001004436	Wapl	0.199	1.194	0.008	0.005	0.408	1.542	0.646	6.491	19.462	15.923	23.825	29.911	27.837
NM_001004455	Cys1	-0.896	0.706	0.975	0.401	0.635	0.36	-0.098	0.035	0.521	0.92	0.322	0.485	0.235
NM_001004468	Tacc2	-0.664	1.239	-1.237	4.151	-0.152	0.102	0.326	0.311	0.261	0.39	0.376	0.321	0.71
NM_001004721	Pigu	0.002	0.004	-0.011	0.004	0.824	1.954	0.909	2.911	15.293	14.331	16.78	28.271	26.542
NM_001004761	Gpr158	0.014	NA	-0.376	NA	0.136	NA	1.023	NA	0.001	0.001	0.003	0.003	0.003
NM_001004762	Pla2g4c	-1.801	0.991	1.331	0.518	1.53	0.752	2.578	1.67	0.065	0.221	0.144	0.394	0.141
NM_001005223	Znhit3	0.225	0.533	-0.171	0.113	0.241	0.264	-0.033	0.033	9.931	7.97	8.458	9.489	10.037
NM_001005225	Olfr1197	NA	NA	NA	NA	NA	NA	NA	NA	0	0	0	0	0
NM_001005227	Olfr1200	NA	NA	NA	NA	NA	NA	NA	NA	0	0	0	0	0
NM_001005230	Olfr1024	NA	NA	NA	NA	NA	NA	NA	NA	0	0	0	0	0
NM_001005232	Dbx1	0.976	NA	1.074	NA	1.141	NA	0.145	NA	0.004	0	0	0.005	0
NM_001005247	Hps5	0.136	0.355	0.704	2.125	-0.057	0.068	-0.031	0.044	4.467	3.833	4.7	4.301	2.469
NM_001005248	Hps5	-0.293	0.725	0.389	0.408	-0.422	0.634	-0.475	1.026	2.709	3.13	2.712	1.903	1.36
NM_001005341	Ypel2	0.579	3.748	-0.26	0.107	0.221	0.465	0.084	0.158	4.817	3.036	4.534	5.008	5.656
NM_001005342	Ypel4	0.19	0.085	0.264	0.134	-0.155	0.109	1.52	2.84	1.101	0.913	3.637	3.119	2.427
NM_001005343	Sp9	-0.12	NA	-7.355	8.635	1.133	NA	0.317	NA	0.006	0.007	0.004	0.008	1.124
NM_001005358	Zfp960	0.361	1.499	0.109	0.099	0.612	2.34	0.21	0.486	8.303	6.092	6.509	9.438	8.181
NM_001005370	Spin2c	-0.757	3.03	-0.174	0.126	0.612	0.958	0.015	0.012	2.801	4.438	1.914	2.783	2.925
NM_001005371	Gm13084	NA	NA	NA	NA	NA	NA	NA	NA	0	0	0	0	0
NM_001005385	Gprasp1	0.041	0.075	0.394	0.919	0.012	0.01	0.005	0.005	8.419	7.695	8.696	8.314	5.895
NM_001005419	Ado	0.222	2.245	0.308	0.536	0.041	0.06	0.594	4.999	19.576	15.777	29.71	28.94	21.933
NM_001005420	Ppp1r26	1.015	18.983	0.028	0.022	0.076	0.121	-0.316	1.317	6.009	2.791	4.731	4.743	4.346
NM_001005421	Jaml	1.483	0.232	-1.316	NA	-0.466	NA	-2.372	0.427	0.044	0.015	0.012	0.008	0.019
NM_001005422	Stmnd1	0.982	0.204	-0.849	NA	NA	NA	-4.508	0.887	0.096	0.046	0	0	0.005
NM_001005423	Mreg	1.067	3.517	-0.214	0.068	0.701	1.398	0.33	0.496	1.658	0.742	1.329	2.039	2.237
NM_001005424	Ajm1	-0.56	0.288	0.119	0.017	-0.104	0.022	-0.527	0.2	0.095	0.133	0.073	0.065	0.056
NM_001005425	Zfp663	-0.505	0.144	-1.338	NA	-0.767	NA	-4.623	1.559	0.084	0.113	0.006	0.003	0.008
NM_001005426	Zcwpw1	-0.009	0.008	0.396	0.462	0.357	0.591	-1	3.525	11.759	11.074	4.727	5.782	4.103
NM_001005475	Iqsec2	-1.304	5.583	0.794	0.514	0.415	0.28	1.472	2.664	0.6	1.389	1.282	1.643	0.877
NM_001005477	Barhl2	NA	NA	NA	NA	NA	NA	NA	NA	0	0	0	0	0
NM_001005481	Olfr132	NA	NA	NA	NA	NA	NA	NA	NA	0	0	0	0	0
NM_001005485	Olfr111	0.581	NA	NA	NA	-0.782	NA	-3.313	NA	0.055	0.036	0.008	0	0
NM_001005488	Olfr467	NA	NA	NA	NA	NA	NA	NA	NA	0	0	0	0	0
NM_001005506	Txlna	0.077	0.261	-0.267	0.531	0.122	0.206	-0.031	0.056	10.674	9.538	9.94	10.267	11.511
NM_001005507	Smg7	0.246	2.222	-0.141	0.118	0.486	1.51	0.485	2.076	16.254	12.916	16.839	22.383	23.061
NM_001005508	Arhgap30	-0.418	0.595	0.063	0.005	0.543	NA	-3.841	5.898	0.727	0.914	0.035	0.049	0.045
NM_001005509	Eif2a	0.468	8.894	0.072	0.089	0.348	2.581	0.157	0.767	49.438	33.554	44.814	54.122	48.166
NM_001005510	Syne2	-0.672	8.621	-1.179	3.811	0.596	1.309	0.43	1.791	3.887	5.806	3.583	5.134	10.913
NM_001005511	Lmtk3	0.934	1.791	0.239	0.177	-0.917	3.129	1.579	8.386	0.908	0.441	5.318	2.661	2.1
NM_001005520	Olfr231	NA	NA	NA	NA	NA	NA	NA	NA	0	0	0	0	0
NM_001005524	Olfr194	NA	NA	NA	NA	NA	NA	NA	NA	0	0	0	0	0
NM_001005525	Rsrc2	0.325	0.9	0.011	0.005	0.592	1.77	-0.342	0.736	18.856	14.21	10.213	14.611	13.56
NM_001005568	Olfr1281	NA	NA	NA	NA	NA	NA	NA	NA	0	0	0	0	0
NM_001005569	Olfr366	NA	NA	NA	NA	NA	NA	NA	NA	0	0	0	0	0
NM_001005570	Olfr707	NA	NA	NA	NA	NA	NA	NA	NA	0	0	0	0	0
NM_001005605	Aebp2	0.259	1.836	0.253	0.436	0.229	0.466	-0.199	1.071	20.281	15.912	15.668	17.329	13.631
NM_001005608	Itgb4	0.378	0.056	0.393	0.054	-0.221	0.043	1.069	0.255	0.056	0.041	0.138	0.113	0.082
NM_001005740	Phactr1	2.017	6.368	4.064	13.741	0.198	0.215	0.604	1.469	1.702	0.401	2.339	2.532	0.145
NM_001005748	Phactr1	3.424	29.713	0.944	0.561	-0.779	0.578	-3.996	46.554	5.404	0.468	0.6	0.329	0.164
NM_001005767	Parl	0.187	0.548	-0.368	0.833	0.032	0.033	0.013	0.017	21.9	18.057	22.338	21.673	26.203
NM_001005784	Patj	0.888	2.255	-1.467	4.285	-0.021	0.01	-1.501	4.827	2.359	1.187	0.873	0.815	2.107
NM_001005787	Patj	0.489	0.346	-1.005	0.85	0.117	0.031	0.116	0.052	0.434	0.293	0.457	0.468	0.858
NM_001005788	Zfp69	-0.141	0.132	-0.21	0.131	0.239	0.221	0.413	0.526	2.264	2.369	2.635	2.975	3.194
NM_001005846	Mcoln2	-0.69	0.082	1.133	0.133	1.081	NA	1.435	0.313	0.042	0.071	0.056	0.119	0.049
NM_001005847	Aga	-0.459	2.1	0.18	0.191	-0.32	0.686	-0.04	0.054	7.126	9.188	8.936	6.799	5.615
NM_001005854	Gm609	-2.337	1.866	-2.423	NA	-0.782	NA	-4.297	NA	0.054	0.252	0.005	0	0.014
NM_001005858	Ifit3b	-1.981	1.662	0.757	0.16	0.27	0.064	1.113	0.471	0.076	0.301	0.15	0.173	0.1
NM_001005859	Rpl34	0.712	9.729	-0.196	0.182	-0.056	0.04	-1.612	18.958	353.204	203.173	123.182	113.349	121.838
NM_001005860	Clec4a4	NA	NA	NA	NA	NA	NA	NA	NA	0	0	0	0	0
NM_001005863	Mtus1	-1.04	3.492	-0.376	0.354	0.119	0.094	0.672	1.487	0.804	1.567	1.222	1.261	1.521
NM_001005864	Mtus1	0.189	NA	-0.594	NA	-1.748	NA	-0.476	NA	0.012	0.009	0.026	0.006	0.01
NM_001005865	Mtus1	0.056	0.051	0.073	0.015	-0.288	0.483	-0.306	0.529	2.104	1.912	2.147	1.676	1.465
NM_001005867	Zmiz2	0.207	0.502	-0.199	0.11	0.619	0.99	1.461	6.244	4.683	3.838	8.652	12.705	13.564
NM_001005868	Erbin	-0.271	0.317	0.176	0.097	-0.365	0.837	1.114	3.588	2.53	2.867	7.292	5.344	4.437
NM_001005916	Zbtb9	0.11	0.274	-0.156	0.239	-0.169	0.363	0.153	0.414	7.203	6.291	9.311	7.854	8.198
NM_001006664	Epb41l1	0.277	0.645	-0.45	0.523	-0.19	0.337	0.795	4.391	2.325	1.806	4.741	3.96	5.03
NM_001006668	Kcnq2	0.976	NA	NA	NA	NA	NA	-0.816	NA	0.002	0.001	0	0	0
NM_001006669	Kcnq2	0.915	NA	NA	NA	NA	NA	-1.72	NA	0.006	0.002	0	0.001	0
NM_001006674	Kcnq2	2.183	NA	NA	NA	NA	NA	-2.022	NA	0.007	0	0	0	0
NM_001007077	Gm13023	NA	NA	NA	NA	NA	NA	NA	NA	0	0	0	0	0
NM_001007154	Phactr3	4.138	NA	1.499	0.244	0.49	0.074	1.985	0.49	0.02	0	0.054	0.072	0.025
NM_001007220	Adam22	-0.948	NA	1.611	NA	-1.328	NA	2.605	NA	0.001	0.003	0.028	0.008	0.003
NM_001007221	Adam22	0.561	0.068	1.671	NA	-2.045	0.339	0.622	0.08	0.047	0.03	0.292	0.071	0.023
NM_001007222	Tdpoz2	NA	NA	NA	NA	NA	NA	NA	NA	0	0	0	0	0
NM_001007223	Clec3a	NA	NA	NA	NA	NA	NA	NA	NA	0	0	0	0	0
NM_001007266	Taar2	NA	NA	1.074	NA	1.141	NA	1.107	NA	0	0	0	0.009	0
NM_001007268	Dusp13	0.976	NA	NA	NA	NA	NA	-0.816	NA	0.007	0	0	0	0
NM_001007460	Zdhhc23	0.045	0.01	-1.527	0.463	1.417	NA	-1.012	0.316	0.237	0.213	0.046	0.117	0.313
NM_001007461	Gsdma3	NA	NA	NA	NA	NA	NA	NA	NA	0	0	0	0	0
NM_001007462	Pabpn1l	-0.876	NA	NA	NA	NA	NA	-0.816	NA	0.01	0.016	0	0	0
NM_001007463	Spag8	2.269	0.478	-4.086	NA	-3.982	NA	-4.977	1.255	0.273	0.048	0.127	0.006	0.131
NM_001007465	Rffl	0.949	8.489	0.006	0.003	-0.381	0.922	-0.594	2.767	6.258	3.03	5.593	4.063	3.801
NM_001007472	Noto	NA	NA	0.112	NA	1.141	NA	1.107	NA	0	0	0	0.007	0.006
NM_001007567	Slc7a6os	0.147	0.287	-0.436	1.975	0.211	0.422	-0.329	1.231	16.168	13.817	11.47	12.637	15.989
NM_001007568	Zfp251	-0.029	0.069	-0.245	0.372	-0.018	0.019	-0.425	2.086	9.489	9.106	7.425	6.935	7.678
NM_001007569	Pnmal1	0.725	0.87	-0.64	0.208	-0.288	0.089	-2.034	3.745	0.389	0.222	0.12	0.093	0.137
NM_001007570	Slc25a42	-0.702	2.958	0.362	0.396	-0.212	0.224	-0.215	0.288	1.838	2.817	1.901	1.559	1.128
NM_001007571	D8Ertd738e	0.361	2.015	-0.316	0.505	-0.124	0.147	-0.181	0.463	94.346	69.151	93.157	81.784	94.967
NM_001007572	Trpv5	-2.681	NA	-0.849	NA	NA	NA	-0.816	NA	0.004	0.024	0	0	0.003
NM_001007573	Maneal	-0.744	1.023	0.504	0.07	0.725	0.267	-1.533	1.845	0.472	0.74	0.102	0.161	0.103
NM_001007574	A830010M20Rik	0.024	0.028	0.949	3.29	0.132	0.131	0.669	2.828	1.097	1.017	1.661	1.717	0.828
NM_001007575	Zfp58	0.466	1.519	0.053	0.042	0.039	0.035	-0.432	1.47	6.067	4.15	4.548	4.409	3.981
NM_001007576	Gucy2f	-2.488	NA	-0.849	NA	-0.782	NA	-0.816	NA	0.001	0.006	0.001	0	0.001
NM_001007577	Tceanc	0.469	2.187	0.196	0.151	0.116	0.093	-0.779	3.61	3.127	2.12	1.75	1.783	1.464
NM_001007578	Armcx6	-0.55	4.106	-0.041	0.03	-0.343	0.718	-0.301	0.859	7.892	10.87	8.36	6.279	6.058
NM_001007579	BC080695	NA	NA	NA	NA	NA	NA	NA	NA	0	0	0	0	0
NM_001007580	Fndc3c1	-0.959	10.234	-1.307	5.982	1.715	9.024	-0.689	2.705	4.099	7.51	0.804	2.496	5.797
NM_001007581	Trp53rka	0.389	1.021	-0.128	0.07	-0.256	0.278	-0.914	3.01	10.544	7.605	6.898	5.479	5.611
NM_001007582	AY761184	NA	NA	NA	NA	NA	NA	NA	NA	0	0	0	0	0
NM_001007583	Best3	0.772	0.144	-4.338	NA	-0.782	NA	-4.292	NA	0.042	0.023	0.004	0	0.04
NM_001007584	Gm11541	-4.278	1.145	-1.906	NA	-0.782	NA	-0.816	NA	0.006	0.115	0.006	0	0.012
NM_001007589	Akirin2	0.169	0.901	-0.419	2.711	0.248	0.895	0.169	0.709	40.698	34.035	39.982	44.918	56.188
NM_001007596	Rtn1	1.657	4.461	-1.259	0.799	0.11	0.025	-2.702	6.99	1.576	0.472	0.235	0.235	0.524
NM_001008230	Rtp2	NA	NA	NA	NA	NA	NA	NA	NA	0	0	0	0	0
NM_001008231	Daam2	-2.443	93.196	0.615	0.441	-0.834	5.981	-1.691	26.909	5.978	30.534	3.415	1.821	1.099
NM_001008232	Asap3	-0.889	5.749	0.131	0.072	-0.66	2.025	-0.491	1.12	1.415	2.468	1.643	0.989	0.839
NM_001008233	Plekhn1	0.681	1.188	0.061	0.022	0.223	0.145	-0.378	0.406	1.444	0.85	0.977	1.094	0.975
NM_001008238	Bnip2	-0.604	6.582	-0.43	1.888	0.217	0.64	0.446	2.373	7.231	10.359	8.777	9.677	12.203
NM_001008419	Aox2	1.84	1.408	-0.146	NA	0.613	NA	-3.974	2.764	0.141	0.038	0.006	0.009	0.009
NM_001008420	Cdh12	2.544	NA	1.074	NA	-0.767	NA	-2.383	NA	0.011	0.002	0.004	0.002	0
NM_001008421	Nol10	0.237	1.361	-0.527	2.701	0.176	0.543	-0.163	0.58	15.881	12.705	12.976	13.928	18.729
NM_001008422	Scaf1	-0.224	1.501	-0.198	0.324	0.02	0.024	0.418	2.594	25.718	28.261	34.904	33.808	36.128
NM_001008423	Ccdc177	0.782	0.588	-1.587	0.489	0.771	NA	-2.438	1.835	0.213	0.115	0.023	0.038	0.108
NM_001008424	Cdsn	NA	NA	-2.47	0.751	0.808	NA	4.209	NA	0	0.001	0.022	0.036	0.182
NM_001008425	Thoc6	1.186	7.014	-0.668	1.316	0.209	0.156	-1.131	5.293	10.62	4.361	4.301	4.752	7.094
NM_001008426	Teddm1b	-0.1	0.034	0.159	0.027	0.165	0.038	-0.093	0.029	0.192	0.195	0.164	0.177	0.148
NM_001008427	Zfp975	0.365	1.391	0.538	1.733	0.01	0.007	-0.048	0.068	4.995	3.658	5	4.748	3.051
NM_001008428	Fbxw20	NA	NA	NA	NA	NA	NA	NA	NA	0	0	0	0	0
NM_001008429	Taar3	0.976	NA	NA	NA	NA	NA	-0.816	NA	0.009	0	0	0	0
NM_001008497	P2ry14	NA	NA	NA	NA	NA	NA	NA	NA	0	0	0	0	0
NM_001008498	Wdr34	-0.071	0.129	0.016	0.007	-0.324	0.483	-0.369	1.06	11.578	11.389	11.523	8.778	8.095
NM_001008499	Taar4	NA	NA	NA	NA	NA	NA	NA	NA	0	0	0	0	0
NM_001008501	Zfp760	0.273	1.379	0.053	0.051	0.3	0.682	-0.137	0.375	9.704	7.568	7.447	8.662	7.811
NM_001008502	Bbs12	0.394	1.856	0.249	0.247	-0.193	0.254	-0.563	2.293	6.124	4.391	4.884	4.063	3.194
NM_001008506	Zc3h14	0.258	0.574	0.182	0.108	0.419	0.68	0.098	0.103	6.197	4.895	5.161	6.549	5.373
NM_001008533	Adora1	0.852	1.129	-1.076	0.507	-0.083	0.025	0.525	0.456	1.01	0.518	1.587	1.416	2.847
NM_001008542	Mxi1	0.876	6.523	-0.318	0.753	-0.433	1.74	-0.943	8.07	17.826	9.073	12.965	9.092	10.6
NM_001008543	Mxi1	1.173	0.602	0.196	0.055	1.379	1.799	1.44	2.528	0.672	0.28	0.733	1.796	1.48
NM_001008545	Tardbp	-0.323	0.074	0.349	0.035	-0.488	0.119	0.342	0.091	0.03	0.036	0.055	0.038	0.029
NM_001008546	Tardbp	-0.721	0.116	-0.465	0.074	-0.359	NA	1.184	0.323	0.014	0.022	0.039	0.031	0.039
NM_001008547	1700001J03Rik	1.681	NA	1.179	NA	1.201	NA	1.367	0.211	0.042	0.012	0.051	0.11	0.044
NM_001008548	Pde2a	-1.083	0.293	-3.774	3.365	2.996	NA	1.584	0.497	0.025	0.048	0.009	0.067	0.892
NM_001008549	Zfp658	0.114	0.106	-0.136	0.109	0.043	0.035	-0.323	0.447	2.539	2.221	2.041	1.996	2.045
NM_001008550	Zfyve26	0.18	0.517	-0.036	0.033	-0.299	1.021	0.032	0.046	3.616	2.998	4.692	3.632	3.479
NM_001008700	Il4ra	0.134	0.179	-0.098	0.079	-0.141	0.092	0.134	0.201	1.726	1.469	2.131	1.86	1.865
NM_001008702	Dab2	-2.33	8.951	-2.608	NA	-2.351	NA	-5.424	3.688	0.234	1.111	0.027	0.006	0.027
NM_001008705	Bud31	-0.547	0.065	-0.486	0.114	-0.411	0.112	1.4	0.341	0.185	0.245	0.647	0.479	0.597
NM_001008706	Calm5	NA	NA	NA	NA	NA	NA	NA	NA	0	0	0	0	0
NM_001008785	Kbtbd8	1.186	5.532	-0.69	0.959	1.253	2.345	-0.42	0.641	1.704	0.707	0.558	1.243	1.891
NM_001008791	Whrn	1.478	1.445	-0.213	0.095	0.469	0.288	-0.116	0.052	1.278	0.439	0.877	1.16	1.251
NM_001008792	Whrn	1.868	2.211	-1.564	0.539	-1.013	0.423	-3.089	4.242	0.71	0.179	0.176	0.08	0.224
NM_001008793	Whrn	1.07	4.655	-0.367	0.244	-0.376	0.413	-1.272	6.439	2.858	1.274	1.573	1.16	1.41
NM_001008973	Tmem232	2.461	NA	NA	NA	-0.782	NA	-2.305	NA	0.012	0	0.004	0	0
NM_001009544	4921501E09Rik	0.976	NA	NA	NA	NA	NA	-0.816	NA	0.002	0	0	0	0
NM_001009545	Adam6b	NA	NA	NA	NA	NA	NA	NA	NA	0	0	0	0	0
NM_001009546	Naaladl1	-0.112	0.069	-0.504	0.562	1.049	1.8	0.892	1.612	0.658	0.667	0.615	1.198	1.598
NM_001009547	Adam26b	NA	NA	NA	NA	NA	NA	NA	NA	0	0	0	0	0
NM_001009548	Adam20	NA	NA	NA	NA	NA	NA	NA	NA	0	0	0	0	0
NM_001009549	Zfp36l3	-0.948	NA	NA	NA	NA	NA	NA	NA	0	0.004	0	0	0
NM_001009550	Mup21	NA	NA	NA	NA	NA	NA	NA	NA	0	0	0	0	0
NM_001009573	Unc13d	-0.116	0.042	0.667	0.254	-1.577	3.637	0.927	0.768	0.157	0.159	0.92	0.293	0.17
NM_001009574	Taar5	-2.809	NA	1.074	NA	1.141	NA	1.107	NA	0	0.033	0	0.011	0
NM_001009575	Armcx5	0.05	0.053	-0.21	0.237	0.092	0.091	-0.108	0.132	4.383	4	3.957	4.003	4.307
NM_001009818	2020-09-11	-0.876	34.456	1.019	8.265	-0.145	0.267	1.271	21.646	71.973	124.185	198.827	170.747	78.61
NM_001009819	A3galt2	-0.224	0.122	-1.277	0.814	0.358	0.193	1.181	1.567	0.26	0.284	0.478	0.58	1.322
NM_001009927	Mief2	-0.496	1.43	0.389	0.388	-0.53	1.001	-0.143	0.177	3.366	4.495	4.526	2.986	2.131
NM_001009929	Brsk2	1.636	0.269	1.074	NA	1.141	NA	-3.35	0.597	0.028	0.008	0.002	0.003	0
NM_001009930	Brsk2	-2.386	NA	-3.819	NA	-3.282	NA	NA	NA	0	0.005	0.013	0	0.017
NM_001009935	Txnip	-0.272	1.124	1.063	6.43	-1.311	13.23	-1.12	10.887	21.869	24.911	25.707	9.887	4.443
NM_001009940	Il19	NA	NA	3.454	1.931	-0.682	0.337	6.858	4.273	0	0	0.901	0.533	0.043
NM_001009947	Dock11	-1.729	82.777	0.421	0.987	-0.706	4.398	-0.048	0.096	7.54	23.493	12.343	7.161	5.006
NM_001009948	Nrsn2	-0.665	0.375	0.473	0.077	-0.084	0.019	-0.454	0.189	0.347	0.526	0.277	0.251	0.164
NM_001009949	Slc25a51	0.163	1.702	0.336	1.326	-0.108	0.279	-0.036	0.098	25.063	21.055	27.209	23.963	17.769
NM_001009950	Slc38a8	-2.514	1.281	-1.415	NA	-0.767	NA	-2.599	NA	0.026	0.145	0.008	0.004	0.011
NM_001009951	Cep44	0.354	1.887	-0.132	0.147	-0.105	0.14	-0.604	3.891	10.981	8.07	8.06	7.088	7.263
NM_001009952	Scgb2b20	NA	NA	NA	NA	NA	NA	NA	NA	0	0	0	0	0
NM_001009978	Pde1a	-3.025	8.645	-1.405	NA	-2.196	NA	-2.342	0.57	0.248	1.904	0.231	0.051	0.119
NM_001009979	Pde1a	2.183	NA	NA	NA	-3.41	NA	-2.022	NA	0.015	0	0.035	0	0
NM_001009981	Slc10a7	-0.18	0.075	-1.227	0.8	-1.741	1.565	-1.464	1.115	0.386	0.41	0.49	0.137	0.304
NM_001010825	Ficd	-0.416	0.909	0.277	0.132	-0.826	2.058	-0.072	0.071	1.569	1.968	2.709	1.463	1.118
NM_001010826	Kctd14	-0.225	0.025	-0.592	NA	1.971	NA	-1.266	0.189	0.078	0.08	0.008	0.031	0.041
NM_001010827	Taar7b	NA	NA	NA	NA	NA	NA	NA	NA	0	0	0	0	0
NM_001010828	Taar6	NA	NA	NA	NA	NA	NA	NA	NA	0	0	0	0	0
NM_001010829	Taar7a	NA	NA	NA	NA	NA	NA	NA	NA	0	0	0	0	0
NM_001010830	Taar8a	NA	NA	NA	NA	NA	NA	NA	NA	0	0	0	0	0
NM_001010831	Taar9	NA	NA	NA	NA	NA	NA	NA	NA	0	0	0	0	0
NM_001010833	Mdc1	-0.039	0.139	0.409	0.514	1.207	5.514	0.354	0.765	19.126	18.484	10.972	24.065	16.863
NM_001010834	Slc10a5	0.788	0.118	0.739	NA	0.706	NA	-0.663	0.119	0.025	0.014	0.011	0.015	0.009
NM_001010835	Taar7e	NA	NA	NA	NA	NA	NA	NA	NA	0	0	0	0	0
NM_001010836	Ppp1r13l	-0.074	0.097	-0.544	1.166	0.109	0.073	-0.117	0.142	2.421	2.391	2.116	2.197	2.991
NM_001010837	Taar8b	NA	NA	NA	NA	NA	NA	NA	NA	0	0	0	0	0
NM_001010838	Taar7d	NA	NA	NA	NA	-0.782	NA	NA	NA	0	0	0.008	0	0
NM_001010839	Taar7f	NA	NA	NA	NA	NA	NA	NA	NA	0	0	0	0	0
NM_001010840	Taar8c	NA	NA	NA	NA	NA	NA	NA	NA	0	0	0	0	0
NM_001010930	Mrps33	0.045	0.026	-0.334	0.178	-0.136	0.075	0.153	0.106	1.95	1.781	2.474	2.12	2.505
NM_001010937	Gjb6	4.106	2.5	-3.037	0.691	2.691	NA	-3.923	2.191	0.231	0.011	0	0.015	0.117
NM_001010941	Gpr12	-5.545	2.674	-1.338	NA	-4.371	NA	0.145	NA	0.007	0.187	0.096	0.005	0.011
NM_001010973	Hrh2	2.078	NA	NA	NA	NA	NA	-2.888	NA	0.017	0.003	0	0	0
NM_001011517	Olfr1193	NA	NA	NA	NA	NA	NA	NA	NA	0	0	0	0	0
NM_001011518	Olfr94	NA	NA	NA	NA	NA	NA	NA	NA	0	0	0	0	0
NM_001011519	Olfr1148	NA	NA	NA	NA	NA	NA	NA	NA	0	0	0	0	0
NM_001011520	Olfr310	NA	NA	NA	NA	NA	NA	NA	NA	0	0	0	0	0
NM_001011523	Olfr913	NA	NA	NA	NA	NA	NA	NA	NA	0	0	0	0	0
NM_001011524	Olfr1418	NA	NA	NA	NA	NA	NA	NA	NA	0	0	0	0.008	0
NM_001011525	Olfr1415	NA	NA	NA	NA	NA	NA	NA	NA	0	0	0	0	0
NM_001011527	Olfr503	NA	NA	NA	NA	NA	NA	NA	NA	0	0	0	0	0
NM_001011528	Olfr456	NA	NA	-1.562	NA	-1.708	NA	1.107	NA	0	0	0.036	0.011	0.028
NM_001011529	Olfr1251	NA	NA	NA	NA	NA	NA	NA	NA	0	0	0	0	0
NM_001011530	Olfr723	NA	NA	NA	NA	NA	NA	NA	NA	0	0	0	0	0
NM_001011531	Olfr329-ps	-0.948	NA	NA	NA	NA	NA	NA	NA	0	0.009	0	0	0
NM_001011532	Olfr1037	NA	NA	NA	NA	NA	NA	NA	NA	0	0	0	0	0
NM_001011533	Olfr688	NA	NA	-0.849	NA	NA	NA	NA	NA	0	0	0	0	0.008
NM_001011534	Olfr988	NA	NA	NA	NA	NA	NA	NA	NA	0	0	0	0	0
NM_001011535	Olfr1182	NA	NA	NA	NA	NA	NA	NA	NA	0	0	0	0	0
NM_001011536	Olfr566	NA	NA	NA	NA	NA	NA	NA	NA	0	0	0	0	0
NM_001011542	Olfr1532-ps1	NA	NA	NA	NA	NA	NA	NA	NA	0	0	0	0	0
NM_001011662	Olfr180	NA	NA	NA	NA	NA	NA	NA	NA	0	0	0	0	0
NM_001011684	Nms	NA	NA	NA	NA	NA	NA	NA	NA	0	0	0	0	0
NM_001011687	Rnase13	NA	NA	NA	NA	NA	NA	NA	NA	0	0	0	0	0
NM_001011695	Olfr1000	NA	NA	NA	NA	NA	NA	NA	NA	0	0	0	0	0
NM_001011707	Cyp2c66	NA	NA	NA	NA	NA	NA	NA	NA	0	0	0	0	0
NM_001011721	Olfr102	NA	NA	NA	NA	NA	NA	NA	NA	0	0	0	0	0
NM_001011732	Xkr7	1.062	NA	-2.479	NA	1.141	NA	-2.404	NA	0.022	0.01	0	0.003	0.022
NM_001011733	Olfr288	NA	NA	NA	NA	NA	NA	NA	NA	0	0	0	0	0
NM_001011734	Olfr1116	NA	NA	NA	NA	NA	NA	NA	NA	0	0	0	0	0
NM_001011735	Olfr1066	NA	NA	NA	NA	NA	NA	NA	NA	0	0	0	0	0
NM_001011736	Olfr205	NA	NA	NA	NA	NA	NA	NA	NA	0	0	0	0	0
NM_001011737	Olfr1357	NA	NA	-0.849	NA	NA	NA	NA	NA	0	0	0	0	0.006
NM_001011738	Olfr744	NA	NA	NA	NA	NA	NA	NA	NA	0	0	0	0	0
NM_001011739	Olfr885	NA	NA	NA	NA	NA	NA	NA	NA	0	0	0	0	0
NM_001011740	Olfr225	NA	NA	NA	NA	NA	NA	NA	NA	0	0	0	0	0
NM_001011741	Olfr1386	NA	NA	NA	NA	NA	NA	NA	NA	0	0	0	0	0
NM_001011742	Olfr479	NA	NA	NA	NA	NA	NA	NA	NA	0	0	0	0	0
NM_001011743	Olfr324	NA	NA	NA	NA	NA	NA	NA	NA	0	0	0	0	0
NM_001011748	Olfr867	NA	NA	NA	NA	NA	NA	NA	NA	0	0	0	0	0
NM_001011749	Olfr704	NA	NA	NA	NA	NA	NA	NA	NA	0	0	0	0	0
NM_001011750	Olfr294	NA	NA	NA	NA	NA	NA	NA	NA	0	0	0	0	0
NM_001011751	Olfr298	NA	NA	NA	NA	NA	NA	NA	NA	0	0	0	0	0
NM_001011752	Olfr293	NA	NA	NA	NA	NA	NA	NA	NA	0	0	0	0	0
NM_001011753	Olfr115	NA	NA	NA	NA	NA	NA	NA	NA	0	0	0	0	0
NM_001011754	Olfr735	NA	NA	-0.849	NA	NA	NA	NA	NA	0	0	0	0	0.009
NM_001011755	Olfr671	NA	NA	NA	NA	NA	NA	NA	NA	0	0	0	0	0
NM_001011756	Olfr948	NA	NA	NA	NA	NA	NA	NA	NA	0	0	0	0	0
NM_001011757	Olfr663	NA	NA	NA	NA	NA	NA	NA	NA	0	0	0	0	0
NM_001011758	Olfr1016	NA	NA	NA	NA	NA	NA	NA	NA	0	0	0	0	0
NM_001011759	Olfr1031	NA	NA	NA	NA	NA	NA	NA	NA	0	0	0	0	0
NM_001011760	Olfr314	NA	NA	NA	NA	NA	NA	NA	NA	0	0	0	0	0
NM_001011761	Olfr1229	NA	NA	NA	NA	NA	NA	NA	NA	0	0	0	0	0
NM_001011767	Olfr299	NA	NA	NA	NA	NA	NA	NA	NA	0	0	0	0	0
NM_001011769	Olfr317	NA	NA	NA	NA	NA	NA	NA	NA	0	0	0	0	0
NM_001011770	Olfr332	NA	NA	NA	NA	NA	NA	NA	NA	0	0	0	0	0
NM_001011771	Olfr1089	NA	NA	NA	NA	NA	NA	NA	NA	0	0	0	0	0
NM_001011773	Olfr1287	NA	NA	NA	NA	NA	NA	NA	NA	0	0	0	0	0
NM_001011774	Olfr1028	NA	NA	NA	NA	NA	NA	NA	NA	0	0	0	0	0
NM_001011775	Olfr1419	NA	NA	NA	NA	NA	NA	NA	NA	0	0	0	0	0
NM_001011776	Olfr527	NA	NA	NA	NA	NA	NA	NA	NA	0	0	0	0	0
NM_001011777	Olfr1042	NA	NA	NA	NA	NA	NA	NA	NA	0	0	0	0	0
NM_001011778	Olfr285	NA	NA	NA	NA	NA	NA	NA	NA	0	0	0	0	0
NM_001011779	Olfr286	NA	NA	NA	NA	NA	NA	NA	NA	0	0	0	0	0
NM_001011780	Olfr287	NA	NA	0.112	NA	1.141	NA	1.107	NA	0	0	0	0.006	0.005
NM_001011782	Olfr543	1.528	NA	0.225	0.018	1.141	NA	1	0.18	0.071	0.024	0.065	0.143	0.113
NM_001011784	Olfr1039	NA	NA	NA	NA	NA	NA	NA	NA	0	0	0	0	0
NM_001011785	Olfr987	NA	NA	NA	NA	NA	NA	NA	NA	0	0	0	0	0
NM_001011787	Olfr1307	NA	NA	NA	NA	NA	NA	NA	NA	0	0	0	0	0
NM_001011788	Olfr1432	NA	NA	NA	NA	NA	NA	NA	NA	0	0	0	0	0
NM_001011789	Olfr222	NA	NA	NA	NA	NA	NA	NA	NA	0	0	0	0	0
NM_001011790	Olfr1382	NA	NA	NA	NA	NA	NA	NA	NA	0	0	0	0	0
NM_001011791	Olfr193	NA	NA	NA	NA	NA	NA	NA	NA	0	0	0	0	0
NM_001011792	Olfr207	NA	NA	NA	NA	NA	NA	NA	NA	0	0	0	0	0
NM_001011793	Olfr598	NA	NA	NA	NA	NA	NA	NA	NA	0	0	0	0	0
NM_001011794	Olfr1322	NA	NA	NA	NA	NA	NA	NA	NA	0	0	0	0	0
NM_001011795	Olfr1275	NA	NA	NA	NA	NA	NA	NA	NA	0	0	0	0	0
NM_001011796	Olfr1249	NA	NA	NA	NA	NA	NA	NA	NA	0	0	0	0	0
NM_001011797	Olfr782	NA	NA	NA	NA	NA	NA	NA	NA	0	0	0	0	0
NM_001011798	Olfr884	NA	NA	NA	NA	NA	NA	NA	NA	0	0	0	0	0
NM_001011799	Olfr453	NA	NA	NA	NA	NA	NA	NA	NA	0	0	0	0	0
NM_001011800	Olfr212	1.29	0.243	0.113	0.015	1.415	NA	1.251	0.409	0.043	0.016	0.039	0.099	0.085
NM_001011801	Olfr213	NA	NA	NA	NA	NA	NA	NA	NA	0	0	0	0	0
NM_001011802	Olfr1318	-1.803	NA	1.066	NA	2.095	NA	2.065	NA	0	0.015	0	0.02	0.008
NM_001011803	Olfr1306	NA	NA	NA	NA	NA	NA	NA	NA	0	0	0	0	0
NM_001011804	Olfr1211	NA	NA	NA	NA	NA	NA	NA	NA	0	0	0	0	0
NM_001011805	Olfr1385	NA	NA	NA	NA	NA	NA	NA	NA	0	0	0	0	0
NM_001011806	Olfr901	NA	NA	NA	NA	NA	NA	NA	NA	0	0	0	0	0
NM_001011807	Olfr191	NA	NA	NA	NA	NA	NA	NA	NA	0	0	0	0	0
NM_001011808	Olfr198	NA	NA	NA	NA	NA	NA	NA	NA	0	0	0	0	0
NM_001011809	Olfr728	NA	NA	NA	NA	NA	NA	NA	NA	0	0	0	0	0
NM_001011810	Olfr485	NA	NA	NA	NA	NA	NA	NA	NA	0	0	0	0	0
NM_001011811	Olfr487	NA	NA	NA	NA	NA	NA	NA	NA	0	0	0	0	0
NM_001011812	Olfr951	NA	NA	NA	NA	NA	NA	NA	NA	0	0	0	0	0
NM_001011813	Olfr93	NA	NA	-0.849	NA	NA	NA	NA	NA	0	0	0	0	0.01
NM_001011814	Olfr524	NA	NA	NA	NA	NA	NA	NA	NA	0	0	0	0	0
NM_001011815	Olfr533	NA	NA	NA	NA	NA	NA	NA	NA	0	0	0	0	0
NM_001011816	Olfr1181	NA	NA	NA	NA	NA	NA	NA	NA	0	0	0	0	0
NM_001011818	Olfr316	NA	NA	NA	NA	NA	NA	NA	NA	0	0	0	0	0
NM_001011819	Olfr312	NA	NA	0.112	NA	0.18	NA	1.107	NA	0	0	0.011	0.012	0.008
NM_001011820.1	Olfr1359	NA	NA	NA	NA	NA	NA	NA	NA	0	0	0	0	0
NM_001011820	Olfr1359	0.976	NA	NA	NA	NA	NA	-0.816	NA	0.011	0	0	0	0
NM_001011821	Olfr804	NA	NA	NA	NA	NA	NA	NA	NA	0	0	0	0	0
NM_001011822	Olfr787	NA	NA	NA	NA	NA	NA	NA	NA	0	0	0	0	0
NM_001011823	Olfr834	NA	NA	NA	NA	NA	NA	NA	NA	0	0	0	0	0
NM_001011824	Olfr832	NA	NA	NA	NA	NA	NA	NA	NA	0	0	0	0	0
NM_001011825	Olfr1105	NA	NA	NA	NA	NA	NA	NA	NA	0	0	0	0	0
NM_001011826	Olfr967	NA	NA	NA	NA	NA	NA	NA	NA	0	0	0	0	0
NM_001011827	Olfr963	NA	NA	NA	NA	NA	NA	NA	NA	0	0	0	0	0
NM_001011828	Olfr304	NA	NA	NA	NA	NA	NA	NA	NA	0	0	0	0	0
NM_001011829	Olfr761	NA	NA	NA	NA	NA	NA	NA	NA	0	0	0	0	0
NM_001011830	Olfr119	NA	NA	NA	NA	NA	NA	NA	NA	0	0	0	0	0
NM_001011831	Olfr1500	NA	NA	NA	NA	NA	NA	NA	NA	0	0	0	0	0
NM_001011832	Olfr1490	NA	NA	NA	NA	NA	NA	NA	NA	0	0	0	0	0
NM_001011833	Olfr1137	NA	NA	NA	NA	NA	NA	NA	NA	0	0	0	0	0
NM_001011834	Olfr1152	NA	NA	NA	NA	NA	NA	NA	NA	0	0	0	0	0
NM_001011835	Olfr1162	NA	NA	NA	NA	NA	NA	NA	NA	0	0	0	0	0
NM_001011836	Olfr1129	NA	NA	NA	NA	NA	NA	NA	NA	0	0	0	0	0
NM_001011837	Olfr748	NA	NA	NA	NA	NA	NA	NA	NA	0	0	0	0	0
NM_001011839	Olfr1437	NA	NA	NA	NA	NA	NA	NA	NA	0	0	0	0	0
NM_001011840	Olfr1463	NA	NA	NA	NA	NA	NA	NA	NA	0	0	0	0	0
NM_001011841	Olfr1465	NA	NA	NA	NA	NA	NA	NA	NA	0	0	0	0	0
NM_001011842	Olfr1474	NA	NA	NA	NA	NA	NA	NA	NA	0	0	0	0	0
NM_001011845	Olfr597	NA	NA	NA	NA	NA	NA	NA	NA	0	0	0	0	0
NM_001011846	Olfr517	NA	NA	NA	NA	NA	NA	NA	NA	0	0	0	0	0
NM_001011847	Olfr591	NA	NA	NA	NA	NA	NA	NA	NA	0	0	0	0	0
NM_001011848	Olfr675	NA	NA	NA	NA	NA	NA	NA	NA	0	0	0	0	0
NM_001011849	Olfr792	NA	NA	NA	NA	NA	NA	NA	NA	0	0	0	0	0
NM_001011850	Olfr1505	NA	NA	NA	NA	NA	NA	NA	NA	0	0	0	0	0
NM_001011851	Olfr412	NA	NA	NA	NA	NA	NA	NA	NA	0	0	0	0	0
NM_001011852	Olfr1029	NA	NA	NA	NA	NA	NA	NA	NA	0	0	0	0	0
NM_001011853	Olfr1425	NA	NA	1.074	NA	1.141	NA	1.107	NA	0	0	0	0.012	0
NM_001011854	Olfr605	NA	NA	NA	NA	NA	NA	NA	NA	0	0	0	0	0
NM_001011855	Olfr169	NA	NA	NA	NA	NA	NA	NA	NA	0	0	0	0	0
NM_001011856	Olfr1331	NA	NA	NA	NA	NA	NA	NA	NA	0	0	0	0	0
NM_001011857	Olfr685	NA	NA	NA	NA	NA	NA	NA	NA	0	0	0	0	0
NM_001011858	Olfr504	NA	NA	NA	NA	NA	NA	NA	NA	0	0	0	0	0
NM_001011859	Olfr965	0.976	NA	NA	NA	NA	NA	-0.816	NA	0.01	0	0	0	0
NM_001011860	Olfr1222	NA	NA	NA	NA	NA	NA	NA	NA	0	0	0	0	0
NM_001011861	Olfr331	NA	NA	NA	NA	NA	NA	NA	NA	0	0	0	0	0
NM_001011862	Olfr699	NA	NA	NA	NA	NA	NA	NA	NA	0	0	0	0	0
NM_001011863	Olfr406	NA	NA	NA	NA	NA	NA	NA	NA	0	0	0	0	0
NM_001011864	Olfr917	NA	NA	NA	NA	NA	NA	NA	NA	0	0	0	0	0
NM_001011865	Olfr624	NA	NA	NA	NA	NA	NA	NA	NA	0	0	0	0	0
NM_001011866	Olfr309	NA	NA	NA	NA	NA	NA	NA	NA	0	0	0	0	0
NM_001011867	Olfr538	NA	NA	NA	NA	NA	NA	NA	NA	0	0	0	0	0
NM_001011868	Olfr1178	NA	NA	NA	NA	NA	NA	NA	NA	0	0	0	0	0
NM_001011869	Olfr452	NA	NA	NA	NA	NA	NA	NA	NA	0	0	0	0	0
NM_001011870	Olfr1329	NA	NA	NA	NA	NA	NA	NA	NA	0	0	0	0	0
NM_001011871	Olfr506	NA	NA	NA	NA	NA	NA	NA	NA	0	0	0	0	0
NM_001011872	Olfr1034	NA	NA	NA	NA	NA	NA	NA	NA	0	0	0	0	0
NM_001011873	Xkr9	1.876	NA	0.97	NA	-1.415	NA	0.1	NA	0.01	0	0.029	0.01	0.004
NM_001011874	Xkr4	-2.131	4.145	0.124	NA	0.73	NA	-2.694	1.555	0.113	0.47	0.011	0.017	0.015
NM_001011875	Rnase12	2.038	2.369	-6.093	39.537	0.968	NA	-2.418	3.553	2.675	0.599	0.266	0.493	31.584
NM_001011876	Ang6	-0.948	NA	NA	NA	NA	NA	NA	NA	0.004	0.013	0	0	0
NM_001011877	Rnase11	3.28	NA	-4.879	8.835	0.22	NA	-0.186	0.028	0.138	0.011	0.106	0.12	3.237
NM_001012236	Trex1	-3.875	2.085	1.823	3.059	-0.095	0.063	6.613	10.32	0.029	0.365	2.863	2.538	0.68
NM_001012265	Olfr857	-1.881	NA	0.994	NA	-0.446	NA	1.023	NA	0.013	0.039	0.033	0.022	0.008
NM_001012266	Olfr835	NA	NA	NA	NA	NA	NA	NA	NA	0	0	0	0	0
NM_001012269	Olfr1513	2.183	NA	0.112	NA	-0.751	NA	-1.06	NA	0.025	0	0.022	0.016	0.008
NM_001012273	Birc5	-0.117	0.173	0.142	0.119	1.135	3.801	-0.166	0.297	3.923	4.025	1.659	3.437	2.911
NM_001012305	Slc39a12	0.442	NA	-1.539	NA	-0.782	NA	-2.095	NA	0.009	0.006	0.004	0	0.006
NM_001012306	Hsd3b3	0.976	NA	1.074	NA	0.18	NA	0.145	NA	0.006	0	0.007	0.007	0
NM_001012307.1	Defa23	NA	NA	NA	NA	NA	NA	NA	NA	0	0	0	0	0
NM_001012307	Defa23	NA	NA	NA	NA	NA	NA	NA	NA	0	0	0	0	0
NM_001012309	Nsrp1	0.302	1.693	0.028	0.012	0.667	1.358	0.726	1.955	13.665	10.438	14.754	22.269	20.31
NM_001012310	Slc25a47	-0.116	0.079	-0.177	0.082	-0.046	0.023	0.546	0.651	1.039	1.062	1.611	1.488	1.569
NM_001012311	Pgbd1	3.483	4.864	1.028	0.494	0.76	0.244	0.873	0.621	0.37	0.033	0.424	0.671	0.303
NM_001012322	Sctr	-1.498	0.578	-4.449	1.038	0.243	NA	-2.315	0.362	0.054	0.152	0.01	0.014	0.23
NM_001012323	Mup20	NA	NA	NA	NA	NA	NA	NA	NA	0	0	0	0	0
NM_001012324	Ecm2	-1.781	5.741	0.103	0.025	0.783	0.447	0.042	0.018	0.296	0.96	0.186	0.302	0.263
NM_001012325	Zfp708	1.876	0.22	0.469	0.079	1.721	1.208	0.949	0.242	0.442	0.111	0.263	0.838	0.574
NM_001012330	Zbtb18	0.634	0.654	0.575	0.357	0.866	0.686	0.259	0.177	1.284	0.793	0.883	1.523	0.946
NM_001012335	Mdk	-0.163	0.389	-0.988	1.591	-0.725	0.935	-0.921	2.267	40.815	42.861	36.549	21.086	39.273
NM_001012336	Mdk	-0.488	3.287	-0.783	0.884	-0.478	0.683	-0.639	1.507	261.826	346.26	241.201	164.694	264.881
NM_001012363	Slc2a9	-2.863	0.521	0.047	NA	-1.403	0.221	2.776	0.358	0.006	0.035	0.108	0.04	0.036
NM_001012392	Bpifb1	NA	NA	0.945	NA	-0.178	NA	2.646	NA	0	0	0.016	0.013	0.013
NM_001012396	Hacd1	-0.646	4.34	0.272	0.322	-0.096	0.129	0.452	1.824	9.94	14.589	15.068	13.363	10.298
NM_001012400	AU022252	0.322	1.364	0.114	0.109	-0.299	0.67	-0.301	0.963	8.954	6.736	9.207	7.127	6.148
NM_001012401	Hspb6	-0.341	0.155	0.512	0.333	-0.002	0.001	1.746	3.991	1.006	1.221	3.503	3.313	2.18
NM_001012402	Hs3st6	3.713	37.226	-0.576	0.73	0.098	0.054	-2.809	34.495	20.663	1.456	2.854	2.896	4.048
NM_001012434	Kctd14	-0.937	0.191	-1.456	NA	1.679	NA	-2.245	0.543	0.063	0.117	0.004	0.015	0.037
NM_001012448	Zfp708	0.792	1.83	0.066	0.021	0.373	0.183	-0.388	0.437	2.584	1.401	1.606	1.946	1.719
NM_001012449	Zfp708	1.461	NA	0.006	0.001	-0.736	0.228	2.178	0.674	0.023	0.007	0.172	0.103	0.096
NM_001012450	Ankrd6	2.826	11.382	1.277	1.688	0.283	0.126	-0.312	0.295	0.988	0.13	0.687	0.776	0.301
NM_001012451	Ankrd6	2.547	33.568	1.197	8.458	0.134	0.227	-0.128	0.267	17.916	2.851	15.434	16.1	6.571
NM_001012477	Cxcl12	-1.358	31.939	3.456	1.422	-1.535	22.079	0.097	0.196	6.825	16.466	21.928	7.16	0.596
NM_001012517	Fut10	-0.739	7.61	0.275	0.451	0.065	0.069	-0.421	1.705	4.07	6.403	3.011	2.981	2.302
NM_001012518	Ehmt1	0.058	0.145	-0.157	0.155	-0.285	1.096	-0.099	0.258	5.409	4.885	6.355	4.951	5.166
NM_001012520	Klri1	-2.732	0.769	NA	NA	NA	NA	-2.431	NA	0.037	0.221	0	0	0
NM_001012623	Rims1	-1.647	0.485	0.877	NA	-0.245	NA	-1.011	NA	0.01	0.029	0.006	0.004	0.003
NM_001012624	Rims1	-1.602	0.624	0.286	NA	-0.655	NA	-1.404	0.298	0.017	0.05	0.01	0.007	0.005
NM_001012625	Rims1	-0.302	0.066	-0.706	0.078	-0.538	NA	-1.422	0.667	0.057	0.067	0.032	0.023	0.033
NM_001012638	Acd	-0.032	0.049	1.089	2.246	0.032	0.022	-0.358	0.909	9.908	9.511	7.761	7.57	3.315
NM_001012640	AY761185	NA	NA	NA	NA	NA	NA	NA	NA	0	0	0	0	0
NM_001012667	Smim19	1.19	0.202	0.59	0.07	-1.108	0.532	0.675	0.231	0.225	0.099	0.771	0.343	0.214
NM_001012704	Wfdc13	0.807	0.106	0.993	NA	2.897	NA	-0.128	0.018	0.075	0.039	0.01	0.068	0.031
NM_001012723	Wfdc16	NA	NA	NA	NA	NA	NA	NA	NA	0	0	0	0	0
NM_001012725	Wfdc6b	1.876	NA	-0.849	NA	NA	NA	-1.72	NA	0.023	0	0.003	0	0.013
NM_001012726	Aym1	-1.001	NA	-3.043	NA	-0.782	NA	-1.74	NA	0.037	0.07	0.019	0	0.083
NM_001012765	Adcy5	-2.013	15.463	0.769	0.527	-0.834	1.075	-0.822	1.204	0.341	1.288	0.354	0.19	0.104
NM_001012766	Ear12	1.221	NA	NA	NA	NA	NA	-2.022	NA	0.038	0.017	0	0	0
NM_001013012	Zfp787	0.15	0.364	-0.327	0.399	-0.146	0.133	-0.537	1.505	13.064	11.105	10.25	8.826	10.385
NM_001013013	Dhrs7c	-0.929	NA	NA	NA	NA	NA	-0.816	NA	0.008	0.016	0	0	0
NM_001013019	Lrrn4cl	0.585	0.209	0.52	0.074	-0.084	0.019	0.553	0.205	0.257	0.167	0.406	0.374	0.232
NM_001013022	Odf3b	-0.775	NA	0.186	NA	-0.295	NA	0.434	NA	0.037	0.058	0.061	0.049	0.039
NM_001013023	Mterf1a	0.247	0.278	-0.492	0.64	0.205	0.15	-0.263	0.297	2.428	1.928	1.83	1.991	2.624
NM_001013024	Usp13	0.1	0.133	0.671	0.658	-0.116	0.112	0.178	0.241	1.688	1.49	2.142	1.88	1.092
NM_001013025	Tgfbrap1	0.313	0.664	0.268	0.374	-0.026	0.025	-0.45	1.731	2.105	1.602	1.613	1.51	1.175
NM_001013026	Ttf2	0.234	1.234	-0.298	0.528	0.349	1.057	-0.429	1.874	11.434	9.164	6.907	8.327	9.6
NM_001013028	Tmem263	-0.698	12.813	0.666	2.528	-0.319	0.441	0.021	0.028	17.047	26.012	22.484	16.914	9.98
NM_001013256	Ctc1	-0.018	0.033	-0.053	0.049	0.304	0.721	0.065	0.11	9.912	9.438	8.685	10.156	9.865
NM_001013360	Npcd	-0.899	1.445	0.434	0.107	0.889	0.383	-0.49	0.318	0.396	0.693	0.161	0.277	0.191
NM_001013362	Npcd	-1.083	3.393	0.343	0.105	0.928	0.627	0.911	0.741	0.798	1.59	0.812	1.48	1.079
NM_001013365	Osm	-0.659	0.581	-1.376	NA	-0.648	NA	-6.462	4.706	0.523	0.766	0.009	0.005	0.014
NM_001013366	Wdr91	0.44	2.363	0.208	0.414	-0.129	0.283	0.219	0.637	8.136	5.641	10.711	9.292	7.533
NM_001013367	Prkaa1	-0.272	1.861	0.321	1.573	-0.215	0.466	0.822	12.698	10.379	11.795	22.123	17.99	13.476
NM_001013368	E2f8	0.083	0.19	0.403	0.446	1.271	4.771	-0.86	4.184	9.203	8.185	2.18	4.958	3.533
NM_001013369	Pfdn4	-1.314	NA	-0.159	NA	0.482	NA	2.132	0.237	0.035	0.072	0.092	0.119	0.128
NM_001013370	Sesn1	-0.079	0.112	0.003	0.001	-0.487	1.718	-0.255	0.548	7.552	7.463	9.163	6.192	5.814
NM_001013371	Dtx3l	-0.76	2.149	0.404	0.254	-0.079	0.042	-0.39	0.438	0.53	0.848	0.445	0.398	0.283
NM_001013372	Nrp	-0.037	0.02	-0.13	0.055	0.553	0.569	-0.052	0.03	2.008	1.949	1.359	1.899	1.928
NM_001013373	Tmprss13	NA	NA	1.074	NA	-0.692	NA	1.107	NA	0	0	0.006	0.003	0
NM_001013374	Lman2l	0.055	0.115	-0.034	0.027	-0.181	0.408	-0.79	6.627	12.073	10.916	8.175	6.862	6.552
NM_001013375	Utp18	0.431	4.773	-0.487	1.936	0.241	0.727	-0.032	0.059	19.589	13.677	16.762	18.789	24.669
NM_001013376	Rpp38	0.401	1.14	0.322	0.355	0.643	1.731	0.106	0.145	8.366	5.975	5.932	8.861	6.588
NM_001013377	Arhgef39	-0.418	1.532	0.187	0.114	0.601	1.191	-0.531	1.415	5.249	6.63	2.472	3.549	2.939
NM_001013378	Uspl1	0.499	0.275	-0.506	0.138	-0.368	0.124	-1.723	1.72	0.503	0.328	0.205	0.148	0.201
NM_001013379	Zfp930	0.296	1.292	-0.135	0.107	0.564	3.245	0.22	0.667	8.299	6.357	6.774	9.484	9.77
NM_001013380	Dync1li2	0.142	1.148	-0.05	0.064	-0.013	0.02	-0.053	0.168	27.537	23.496	27.744	26.03	25.189
NM_001013381	Rsad1	0.479	1.201	0.217	0.193	-0.119	0.111	-0.877	3.388	2.7	1.809	1.641	1.442	1.159
NM_001013382	Lrrc52	NA	NA	NA	NA	NA	NA	NA	NA	0	0	0	0	0
NM_001013384	Podnl1	-2.051	0.432	0.71	NA	-0.353	NA	1.564	0.239	0.022	0.088	0.088	0.065	0.037
NM_001013385	Grm4	1.876	NA	-1.852	NA	NA	NA	-1.72	NA	0.007	0	0	0	0.006
NM_001013386	Rasl10b	-3.702	NA	NA	NA	NA	NA	NA	NA	0.001	0.018	0.001	0	0
NM_001013387	Zfp182	0.698	1.533	0.343	0.205	0.362	0.369	0.138	0.143	0.801	0.463	0.714	0.865	0.641
NM_001013389	Mrs2	0.078	0.215	0.13	0.149	-0.286	0.849	0.22	0.741	9.985	8.897	14.7	11.404	9.772
NM_001013390	Scn4b	-0.491	0.168	-1.497	0.835	-0.245	0.05	0.111	0.028	0.051	0.067	0.068	0.054	0.143
NM_001013391	Cpsf6	0.182	0.556	-0.204	0.314	0.442	1.135	0.045	0.075	27.943	23.052	22.068	28.222	30.461
NM_001013393	Gm11487	NA	NA	NA	NA	NA	NA	NA	NA	0	0	0	0	0
NM_001013405	Tcaim	-0.012	0.012	0.041	0.022	-0.117	0.112	0.048	0.05	1.953	1.857	2.27	1.987	1.8
NM_001013411	Nkain2	-0.159	0.023	-2.96	NA	-4.611	NA	-4.946	1.258	0.056	0.061	0.047	0	0.013
NM_001013412	Ccl26	NA	NA	NA	NA	NA	NA	NA	NA	0	0	0	0	0
NM_001013414	Neurl4	0.227	2.262	-0.258	0.868	-0.171	0.502	-0.169	0.916	11.216	9.011	11.579	9.788	10.946
NM_001013441	Ric8b	-0.092	0.209	0.162	0.228	-0.226	0.553	0.163	0.352	4.686	4.704	6.355	5.162	4.299
NM_001013575	Olfr112	NA	NA	-0.849	NA	NA	NA	NA	NA	0	0	0	0	0.006
NM_001013577	Inip	0.272	1.18	-0.862	5.912	0.534	3.284	-0.04	0.068	10.862	8.479	7.543	10.374	17.67
NM_001013580	Pard3	-0.402	0.277	0.628	0.637	0.842	0.453	0.188	0.103	1.489	1.821	0.993	1.662	0.995
NM_001013581	Pard3	-0.504	0.137	-0.611	0.246	-0.514	0.231	1.582	1.06	0.062	0.082	0.266	0.177	0.253
NM_001013607	Vmo1	0.662	0.15	5.021	NA	-1.031	0.316	0.093	0.018	0.246	0.145	0.543	0.253	0
NM_001013608	Ercc6l2	0.363	4.408	0.219	0.409	0.019	0.029	0.253	1.363	12.361	9.031	15.046	14.459	11.628
NM_001013609	Tex24	1.622	NA	0.112	NA	1.141	NA	-0.499	NA	0.009	0	0	0.005	0.004
NM_001013616	Trim6	-1.074	1.212	-0.106	0.021	-0.427	0.165	-0.384	0.185	0.176	0.351	0.19	0.132	0.133
NM_001013741	Ddn	3.448	3.135	0.583	NA	0.12	NA	-3.901	3.164	0.55	0.048	0.034	0.036	0.022
NM_001013745	Zfp57	-0.871	4.399	-0.51	0.568	-0.246	0.216	0.313	0.475	4.875	8.443	7.356	5.98	7.883
NM_001013749	Tmem151b	-0.185	0.57	-0.833	2.513	0.034	0.026	-0.004	0.004	3.289	3.508	3.289	3.22	5.348
NM_001013750	Gm597	NA	NA	1.074	NA	1.141	NA	1.107	NA	0	0	0	0.003	0
NM_001013751	Syna	-2.099	2.157	0.799	0.202	-0.391	0.115	1.362	0.648	0.06	0.245	0.207	0.153	0.081
NM_001013753	Pcdh17	-1.946	11.769	3.353	13.689	-3.829	40.003	0.72	1.145	0.584	2.143	14.1	0.948	0.087
NM_001013754	Gm9949	-1.333	0.142	-1.622	0.643	1.471	NA	2.307	0.502	0.048	0.114	0.093	0.238	0.679
NM_001013755	5730409E04Rik	-0.922	0.488	1.853	0.873	-0.482	0.201	0.399	0.13	0.43	0.748	0.808	0.549	0.144
NM_001013756	Grhl3	0.781	0.364	-1.417	0.661	-0.142	0.022	-1.476	0.84	0.221	0.122	0.087	0.079	0.194
NM_001013757	Vwde	-0.597	NA	-1.152	NA	-0.648	NA	-1.136	NA	0.006	0.009	0.004	0.003	0.006
NM_001013758	Lingo3	1.809	4.112	-0.556	0.196	-0.094	0.022	-1.923	4.046	0.744	0.201	0.212	0.193	0.268
NM_001013759	Gas2l2	-2.429	NA	-0.849	NA	-2.234	NA	NA	NA	0	0.009	0.009	0	0.004
NM_001013760	Cldn34b3	NA	NA	NA	NA	NA	NA	NA	NA	0	0	0	0	0
NM_001013761	Gmnc	NA	NA	NA	NA	NA	NA	NA	NA	0	0.001	0	0	0
NM_001013762	Gm4952	NA	NA	NA	NA	NA	NA	NA	NA	0.001	0.006	0.001	0.003	0
NM_001013764	Ces1a	0.014	NA	0.112	NA	1.141	NA	0.145	NA	0.006	0.005	0	0.006	0.005
NM_001013765	Zscan4c	NA	NA	NA	NA	NA	NA	NA	NA	0	0	0	0	0
NM_001013766	Samd3	NA	NA	-0.849	NA	-0.782	NA	NA	NA	0	0	0.004	0	0.004
NM_001013767	Capn11	2.608	NA	-0.228	NA	-1.97	NA	-0.906	NA	0.024	0.004	0.05	0.013	0.014
NM_001013769	Rsl1	0.188	0.21	0.144	0.094	0.238	0.263	0.29	0.387	1.822	1.509	1.954	2.196	1.86
NM_001013770	Lipo3	-0.669	4.803	0.424	0.687	-0.298	0.303	-0.265	0.522	3.764	5.618	4.017	3.067	2.141
NM_001013771	Gm973	-0.491	0.073	-1.459	NA	-1.721	NA	-2.823	NA	0.021	0.028	0.01	0.004	0.008
NM_001013773	Nxpe5	0.003	NA	NA	NA	-0.782	NA	-2.321	NA	0.013	0.012	0.004	0	0
NM_001013774	Kpna7	NA	NA	NA	NA	NA	NA	NA	NA	0	0	0	0	0
NM_001013776	Fbxw24	-1.847	NA	NA	NA	NA	NA	NA	NA	0	0.012	0	0	0
NM_001013777	Zfp488	0.323	0.647	0.042	0.044	-0.133	0.249	-0.598	1.595	7.163	5.357	5.351	4.628	4.195
NM_001013778	Tvp23a	-0.26	0.839	-0.103	0.07	0.032	0.033	-0.095	0.225	5.119	5.746	4.82	4.702	4.701
NM_001013779	Aim2	-1.739	8.994	1.66	3.531	0.312	0.246	0.786	1.098	0.763	2.393	1.101	1.299	0.381
NM_001013780	Slc25a34	2.883	7.934	3.795	19.405	-1.756	15.433	1.172	4.26	0.753	0.097	5.932	1.664	0.112
NM_001013783	Fam71b	1.345	NA	1.677	NA	-0.75	NA	-0.511	NA	0.022	0.008	0.026	0.015	0.003
NM_001013784	Ccdc92b	0.404	0.149	-0.17	0.021	-1.138	0.499	-0.984	0.415	0.121	0.086	0.138	0.061	0.062
NM_001013785	Akr1c19	-1.889	0.964	1.415	NA	-0.054	NA	-0.099	0.016	0.14	0.498	0.144	0.127	0.047
NM_001013786	Zscan26	-0.361	0.765	0.798	1.182	-0.048	0.022	0.009	0.006	4.224	5.059	4.588	4.18	2.243
NM_001013787	Vmn1r209	NA	NA	NA	NA	NA	NA	NA	NA	0	0	0	0	0
NM_001013792	Otulin	0.072	0.148	-0.01	0.009	0.146	0.201	-0.099	0.19	13.747	12.285	11.933	12.608	11.878
NM_001013797	Spink6	NA	NA	NA	NA	NA	NA	NA	NA	0	0	0	0	0
NM_001013799	Mettl21c	2.496	NA	0.664	NA	0.741	NA	0.098	0.011	0.053	0.009	0.036	0.056	0.034
NM_001013802	Macrod2	1.574	1.798	0.251	0.074	0.653	0.361	-0.432	0.291	0.656	0.207	0.321	0.48	0.376
NM_001013804	Flg2	NA	NA	NA	NA	NA	NA	NA	NA	0	0	0	0	0
NM_001013806	Ankrd13c	0.136	0.477	0.247	0.599	-0.219	0.56	0.158	0.488	11.047	9.449	14.871	12.074	9.521
NM_001013810	Gm5591	1.901	NA	1.074	NA	-0.692	NA	-0.778	NA	0.006	0	0.005	0.003	0
NM_001013811	Fam169b	1.65	4.472	0.851	0.979	0.259	0.155	-0.017	0.011	0.86	0.257	0.735	0.836	0.434
NM_001013813	Maml2	-1.812	39.643	0.844	1.091	-0.482	0.812	0.706	1.846	2.22	7.335	5.237	3.564	1.836
NM_001013814	Amt	1.312	13.625	-0.47	1.776	-0.093	0.179	0.155	0.479	11.533	4.343	14.168	12.594	16.33
NM_001013816	Gm5622	NA	NA	-0.849	NA	NA	NA	NA	NA	0	0	0	0	0.005
NM_001013817	Sp140	-0.655	0.531	0.231	0.035	-1.17	0.651	-1.211	0.888	0.27	0.402	0.268	0.119	0.091
NM_001013820	Slc22a28	2.255	NA	1.074	NA	1.141	NA	-1.135	NA	0.012	0.002	0	0.005	0
NM_001013823	Krtap4-16	NA	NA	-0.849	NA	NA	NA	NA	NA	0	0	0	0	0.008
NM_001013824	Gm5662	NA	NA	NA	NA	NA	NA	NA	NA	0	0.001	0	0	0
NM_001013826	Dupd1	NA	NA	NA	NA	-0.782	NA	NA	NA	0	0	0.008	0	0
NM_001013829	Shf	0.207	0.41	-0.231	0.143	-0.231	0.273	0.644	1.927	5.456	4.444	10.29	8.346	9.146
NM_001013832	Gpr31b	-0.017	NA	-1.673	NA	-2.661	NA	-2.656	NA	0.038	0.036	0.039	0	0.017
NM_001013833	Prkg1	-0.616	0.553	-1.093	1.767	0.238	0.132	-0.415	0.395	0.32	0.47	0.211	0.237	0.467
NM_001014390	Dyrk2	0.063	0.136	1.183	9.583	-0.44	2.747	1.301	25.613	16.436	14.761	56.652	39.74	16.407
NM_001014394	Adgrf3	-1.862	0.602	1.074	NA	-2.267	NA	-2.599	NA	0.022	0.078	0.018	0.004	0
NM_001014395	Fbxw22	NA	NA	NA	NA	NA	NA	NA	NA	0	0	0	0	0
NM_001014397	Zfp985	0.28	0.365	0.086	0.041	0.56	0.483	0.486	0.679	2.341	1.814	2.325	3.223	2.834
NM_001014398	Trcg1	-0.045	NA	0.869	NA	0.819	NA	1.438	0.308	0.02	0.019	0.032	0.054	0.028
NM_001014399	Abi3bp	1.95	0.914	1.602	NA	0.178	NA	-3.367	1.65	0.169	0.041	0.016	0.018	0.006
NM_001014422	Abi3bp	-0.236	0.038	NA	NA	-3.449	NA	-5.547	1.419	0.06	0.07	0.014	0	0
NM_001014423	Abi3bp	0.686	0.721	-0.702	NA	0.614	NA	-5.191	6.321	0.667	0.391	0.015	0.017	0.028
NM_001014424	Abi3bp	0.054	0.027	1.254	0.124	1.248	NA	-3.202	7.509	0.541	0.484	0.027	0.058	0.023
NM_001014761	Scn2b	-0.873	9.226	0.657	0.682	-0.205	0.257	-1.058	6.545	2.348	4.034	1.343	1.109	0.652
NM_001014836	4930404N11Rik	NA	NA	-0.849	NA	NA	NA	NA	NA	0	0	0	0	0.013
NM_001014900	Zmynd12	0.602	0.137	0.091	NA	-0.484	NA	-0.599	0.141	0.105	0.065	0.098	0.068	0.06
NM_001014973	Snx13	-0.672	7.328	0.449	1.974	-0.138	0.225	0.735	5.186	4.789	7.174	9.09	7.818	5.345
NM_001014974	Ttll4	0.475	8.003	-0.567	3.231	0.43	2.64	-0.012	0.03	12.948	8.771	9.853	12.603	17.484
NM_001014976	Espl1	-0.24	1.603	-0.31	0.607	1.08	10.919	0.016	0.031	8.453	9.39	4.189	8.378	9.736
NM_001014981	Wdr7	0.014	0.025	0.663	2.374	-0.283	0.652	0.328	1.284	3.366	3.134	5.333	4.141	2.451
NM_001014995	Fam189b	1.093	23.697	0.261	0.232	-0.482	1.321	0.245	0.536	16.772	7.388	28.655	19.473	15.295
NM_001014996	Cenpj	0.298	1.445	-0.234	0.288	0.919	3.557	0.473	1.551	5.608	4.302	4.277	7.67	8.402
NM_001014997	Gm156	NA	NA	NA	NA	NA	NA	NA	NA	0	0	0	0	0
NM_001015039	Zfyve28	0.264	0.138	0.2	0.034	-0.246	0.064	-1.87	2.435	0.288	0.223	0.096	0.077	0.063
NM_001015046	Rap1gap2	-0.284	0.122	0.483	0.108	0.467	0.123	-0.31	0.121	0.088	0.099	0.054	0.067	0.045
NM_001015099	G2e3	-0.257	0.589	-0.131	0.086	0.687	1.417	0.465	1.314	9.13	10.269	8.155	12.299	12.667
NM_001015507	Dcaf1	0.409	7.111	-0.245	0.403	0.379	2.207	0.082	0.297	16.83	11.915	14.192	17.478	19.411
NM_001015681	E130308A19Rik	0.289	1.313	-0.215	0.281	-0.113	0.162	0.179	0.41	6.554	5.044	8.318	7.267	7.914
NM_001015876	Tyw1	0.089	0.265	-0.345	0.734	0.001	0.002	-0.28	0.943	10.326	9.113	8.767	8.334	9.912
NM_001015889	Taf9	0.689	2.278	-0.628	1.474	0.172	0.213	-0.235	0.398	6.944	4.064	5.417	5.812	8.345
NM_001017362	Arid3c	-1.886	NA	-2.461	NA	-2.697	NA	-0.816	NA	0.008	0.022	0.024	0.004	0.018
NM_001017393.1	Gm21943	NA	NA	NA	NA	NA	NA	NA	NA	0	0	0	0	0
NM_001017393.2	Gm21943	NA	NA	NA	NA	NA	NA	NA	NA	0	0	0	0	0
NM_001017393	Gm21943	NA	NA	NA	NA	NA	NA	NA	NA	0	0	0	0	0
NM_001017394	Gm20815	NA	NA	NA	NA	NA	NA	NA	NA	0	0	0	0	0
NM_001017407	Tbata	NA	NA	NA	NA	NA	NA	NA	NA	0	0	0	0	0
NM_001017409	Tbata	NA	NA	NA	NA	NA	NA	NA	NA	0	0	0	0	0
NM_001017419	Tbata	-0.948	NA	-0.849	NA	NA	NA	NA	NA	0	0.006	0	0	0.007
NM_001017422	Ear4	NA	NA	NA	NA	NA	NA	NA	NA	0	0	0	0	0
NM_001017426	Kdm6b	0.397	6.066	-0.12	0.105	0.127	0.192	0.471	2.014	27.208	19.388	35.647	37.12	37.609
NM_001017427	Rasef	2.921	54.172	0.277	0.076	0.228	0.216	-2.69	52.51	15.353	1.887	2.117	2.333	1.818
NM_001017429	Cox17	0.55	2.717	-0.03	0.03	0.109	0.147	0.286	0.829	41.283	26.525	48.004	49.452	47.203
NM_001017433	Tbata	NA	NA	NA	NA	NA	NA	NA	NA	0	0	0	0	0
NM_001017441	Tbata	NA	NA	NA	NA	NA	NA	NA	NA	0	0	0	0	0
NM_001017525	Btbd11	2.831	12.337	1.671	0.989	1.2	0.506	-1.738	9.572	3.373	0.434	0.465	0.987	0.289
NM_001017955	Zscan18	0.588	2.1	-0.223	0.158	0	0	-2.44	18.908	5.994	3.737	1.135	1.087	1.181
NM_001017959	Lamp2	-0.035	0.039	0.37	0.341	0.605	1.075	1.929	13.804	7.864	7.551	20.19	29.549	21.297
NM_001017966	Ddi2	0.407	5.746	0.168	0.476	-0.218	1.117	0.468	5.336	20.569	14.608	34.187	27.935	23.222
NM_001017968	Zdhhc18	-0.6	8.498	-0.357	0.577	-0.07	0.068	0.544	2.284	9.916	14.1	15.644	14.168	17.031
NM_001017983	Foxred2	0.677	4.434	-0.454	0.345	0.737	1.175	-1.063	4.828	3.084	1.809	0.915	1.443	1.866
NM_001017985	C2cd3	0.526	10.416	-0.197	0.366	0.316	1.167	-0.407	2.362	15.888	10.356	9.946	11.777	12.603
NM_001018002	Dppa4	-0.859	NA	NA	NA	NA	NA	-0.816	NA	0.007	0.013	0	0	0
NM_001018013	Izumo1	-1.47	NA	-1.338	NA	1.141	NA	-1.018	NA	0.015	0.042	0	0.007	0.018
NM_001018019	Grxcr1	NA	NA	NA	NA	NA	NA	NA	NA	0	0	0	0	0
NM_001018031	Otol1	3.927	2.807	-1.447	0.912	-1.473	2.335	0.556	0.314	0.266	0.016	1.119	0.381	0.963
NM_001018042	Sp3	-0.056	0.102	-0.03	0.019	0.086	0.09	0.014	0.016	22.219	21.629	21.938	21.92	21.004
NM_001018063	Rtl8b	-0.3	1.652	-0.058	0.023	-0.814	1.874	-0.497	1.115	37.398	43.251	47.925	25.951	25.294
NM_001018079	Lce3f	NA	NA	NA	NA	NA	NA	NA	NA	0	0	0	0	0
NM_001018087	Ldoc1	2.816	NA	-3.134	0.763	0.88	NA	0.512	NA	0.027	0	0.023	0.038	0.309
NM_001024134	Trim15	0.014	0.003	-0.548	0.075	2.446	NA	-0.746	0.167	0.137	0.13	0.012	0.08	0.11
NM_001024135	Kbtbd7	-0.069	0.208	0.481	1.331	-0.035	0.029	-0.117	0.249	7.174	7.08	7.06	6.481	4.351
NM_001024136	Anks6	-0.828	0.168	-0.226	NA	0.353	NA	-1.116	0.143	0.059	0.095	0.022	0.027	0.03
NM_001024137	Pla2g4d	-0.948	NA	0.004	NA	2.023	NA	1.985	NA	0	0.003	0	0.006	0.006
NM_001024138	Gpr139	-0.948	NA	1.044	NA	2.072	NA	2.046	NA	0	0.009	0	0.021	0.009
NM_001024139	Adamts15	-0.289	0.444	1.983	5.398	0.117	0.093	1.21	5.341	1.783	2.071	3.952	4.04	0.952
NM_001024141	Nxf3	NA	NA	0.205	NA	0.961	NA	1.88	NA	0	0	0.003	0.006	0.005
NM_001024142	Fbxo10	-0.218	1.235	0.289	0.583	-0.406	2.395	0.156	0.51	8.434	9.215	12.849	9.219	7.045
NM_001024145	Pla2g4f	NA	NA	1.074	NA	1.141	NA	1.107	NA	0	0.004	0.003	0.004	0.001
NM_001024147	Gm5868	-1.196	NA	0.112	NA	-1.331	NA	-0.499	NA	0.01	0.028	0.019	0.008	0.007
NM_001024148	Ugt2a2	NA	NA	NA	NA	NA	NA	NA	NA	0	0	0	0	0
NM_001024205	Nufip2	0.237	1.087	0.057	0.044	0.352	0.671	0.248	0.765	9.918	7.924	9.599	11.559	10.394
NM_001024206	Trappc1	-0.226	0.828	0.292	0.606	0.083	0.156	0.393	2.108	27.419	30.074	35.125	35.336	26.909
NM_001024225	Defa24	NA	NA	NA	NA	NA	NA	NA	NA	0	0	0	0	0
NM_001024230	Gm5431	0.161	0.099	-0.262	0.104	-0.06	0.023	-0.227	0.136	0.467	0.394	0.432	0.394	0.439
NM_001024385	Crls1	0.468	3.115	-0.3	0.246	-0.068	0.048	-0.531	1.069	15.246	10.37	11.456	10.303	11.924
NM_001024458	Add1	-0.73	15.078	0.428	1.089	-0.2	0.803	0.543	5.386	26.153	40.75	45.17	37.426	25.916
NM_001024468	Bcat1	-3.141	1.167	-1.816	0.285	1.642	NA	1.532	0.2	0.007	0.057	0.006	0.017	0.061
NM_001024474	Diras2	2.49	4.675	-5.99	8.642	-0.267	NA	-4.456	8.029	0.425	0.072	0.024	0.019	1.112
NM_001024478	Cdhr3	0.264	NA	NA	NA	NA	NA	-2.966	NA	0.015	0.012	0	0	0
NM_001024504	Dcun1d2	0.3	0.737	0.526	0.615	0.006	0.003	-0.213	0.386	3.714	2.847	3.331	3.16	2.032
NM_001024508	Brd9	-0.075	0.179	-0.091	0.074	0.31	1.041	0.213	0.736	14.875	14.759	14.38	16.942	16.786
NM_001024512	Fam149b	0.187	0.537	-0.125	0.036	-1.014	2.436	-1.382	6.203	6.403	5.295	5.165	2.404	2.442
NM_001024526	Larp4	0.484	4.275	-0.457	0.611	0.13	0.137	-0.101	0.139	18.476	12.386	16.323	16.825	21.741
NM_001024539	Shc2	0.518	4.712	-0.366	0.716	-0.526	1.817	-0.314	0.982	8.368	5.491	10.012	6.595	7.966
NM_001024560	Snx32	0.752	1.321	1.091	3.005	-0.435	0.749	0.881	2.41	1.676	0.935	4.303	3.035	1.331
NM_001024602	Cep170b	0.369	1.763	-0.768	5.136	-0.126	0.279	1.112	14.357	8.265	5.998	20.16	17.552	28.013
NM_001024604	Ankrd28	0.395	5.637	-0.025	0.019	0.118	0.2	0.507	4.463	12.092	8.636	16.426	16.844	16.066
NM_001024606	Pdp2	1.381	36.917	-0.205	0.288	0.351	2.078	0.709	9.728	10.189	3.67	13.487	16.363	17.662
NM_001024614	Cfap299	-1.896	0.322	NA	NA	-0.782	NA	-3.041	NA	0.055	0.191	0.01	0	0
NM_001024616	Rabl6	-0.095	0.51	0.1	0.106	0.204	0.456	0.246	0.848	29.84	29.989	31.676	34.82	30.264
NM_001024617	Inpp4b	-1.467	1.866	0.99	0.364	0.13	0.033	0.054	0.018	0.183	0.471	0.176	0.186	0.089
NM_001024618	Xirp2	0.017	NA	NA	NA	NA	NA	-1.74	NA	0.001	0.001	0	0	0
NM_001024619	Tsku	-1.005	5.838	-0.237	0.448	0.032	0.022	0.643	2.077	3.259	6.148	5.093	4.999	5.516
NM_001024622	Pcnp	0.099	0.614	-0.025	0.021	0.283	0.839	0.275	2.007	60.755	53.313	62.711	72.098	68.694
NM_001024624	Cdkl5	-0.032	0.033	-1.534	6.253	0.679	0.918	0.269	0.299	1.679	1.612	1.315	1.992	5.353
NM_001024626	Zfp873	0.229	0.197	-0.07	0.008	0.842	0.181	-2.489	2.623	1.959	1.554	0.199	0.334	0.339
NM_001024645	Carmil3	-0.812	6.691	0.621	0.513	-0.853	1.796	-0.736	1.709	1.748	2.889	1.969	1.026	0.624
NM_001024672	Methig1	3.634	NA	-0.849	NA	NA	NA	-3.477	NA	0.045	0	0	0	0.007
NM_001024673	Ifnl2	NA	NA	NA	NA	NA	NA	NA	NA	0	0	0	0	0
NM_001024698	Cpa2	-1.044	18.565	1.388	0.736	-1.019	1.372	-3.535	49.214	9.459	18.346	1.695	0.8	0.291
NM_001024699	Zbtb45	-0.443	0.174	-0.875	0.128	-1.141	0.515	-1.832	0.924	0.946	1.22	0.603	0.262	0.443
NM_001024702	C1ql4	2.981	5.709	2.999	1.683	-1.105	2.471	0.744	1.134	1.969	0.233	7.241	3.227	0.364
NM_001024703	Mctp2	-1.017	3.054	-1.076	2.141	0.567	0.49	-1.962	10.397	1.165	2.235	0.21	0.292	0.578
NM_001024705	Prpmp5	NA	NA	-0.849	NA	NA	NA	NA	NA	0	0	0	0	0.007
NM_001024706	Gm5458	0.976	NA	1.074	NA	1.141	NA	0.145	NA	0.008	0	0	0.011	0
NM_001024707	Lrp3	-0.343	1.402	-0.53	0.749	-0.44	1.523	-0.683	4.031	11.556	13.739	10.052	7.058	9.487
NM_001024709	Krtap10-10	NA	NA	NA	NA	NA	NA	NA	NA	0	0	0	0	0
NM_001024712	Gm3696	0.631	0.559	-1.175	0.717	0.414	0.104	-1.622	1.979	0.896	0.551	0.219	0.285	0.609
NM_001024714	Cma2	NA	NA	NA	NA	NA	NA	NA	NA	0	0	0	0	0
NM_001024716	Triobp	-0.922	13.056	0.502	3.267	-0.232	0.606	0.897	8.642	13.142	23.42	29.613	24.047	15.862
NM_001024717	Gal3st3	0.349	0.453	0.074	0.04	0.294	0.351	0.87	2.206	1.389	1.019	2.132	2.486	2.206
NM_001024719	Cyp2c67	NA	NA	NA	NA	NA	NA	NA	NA	0	0	0	0	0
NM_001024720	Hmcn1	0.573	2.335	1.643	23.082	-0.545	3.701	-1.541	12.792	24.599	15.447	12.731	8.28	2.477
NM_001024721	Ifi214	NA	NA	NA	NA	-0.782	NA	NA	NA	0	0	0.007	0	0.002
NM_001024726	Zfp607a	0.41	0.893	-0.038	0.025	0.349	0.598	-0.099	0.137	2.655	1.889	2.024	2.434	2.337
NM_001024728	C330021F23Rik	1.464	3.636	0.144	0.06	0.462	0.424	-0.31	0.329	1.508	0.513	0.917	1.195	1.01
NM_001024731	Gm20939	0.252	0.485	-0.356	0.423	0.333	0.509	0.621	2.482	2.44	1.93	3.107	3.688	4.435
NM_001024806	Cebpz	0.347	5.9	-0.357	1.923	0.336	1.696	-0.338	2.787	24.449	18.074	15.882	19.004	22.744
NM_001024837	Adarb1	1.099	1.873	0.405	0.277	1.227	1.113	0.491	0.803	0.597	0.258	0.366	0.826	0.577
NM_001024838	Adarb1	1.321	2.404	-2.032	2.19	-1.142	0.736	-1.994	2.544	0.655	0.244	0.374	0.161	0.619
NM_001024841	Gm128	0.35	0.112	-0.315	0.043	-1.484	0.688	-1.027	0.421	0.22	0.162	0.311	0.107	0.125
NM_001024842	Hoxc11	-0.156	0.224	0.179	0.08	-0.314	0.271	-0.305	0.357	5.153	5.384	5.335	4.078	3.362
NM_001024846	Zfp62	0.921	1.603	0.108	0.045	0.558	0.438	-0.446	0.763	0.926	0.463	0.485	0.669	0.576
NM_001024848	Apol7b	0.22	0.063	-0.379	0.086	0.508	0.122	-0.385	0.148	0.303	0.247	0.174	0.226	0.283
NM_001024849	Gm14325	0.508	1.512	0.501	0.356	0.529	0.658	0.454	0.613	4.711	3.093	4.604	6.354	4.179
NM_001024850	Rhox10	NA	NA	NA	NA	NA	NA	NA	NA	0	0	0	0	0
NM_001024851	Ankrd34a	-1.657	7.778	1.664	2.897	-0.857	1.79	0.465	0.538	0.603	1.799	1.554	0.82	0.24
NM_001024853	Timm9	-0.668	0.127	-0.188	0.015	-0.396	NA	0.058	0.008	0.15	0.234	0.221	0.166	0.181
NM_001024854	Timm9	-0.191	0.095	-0.079	0.039	0.692	1.267	1.347	4.275	2.069	2.252	3.353	5.13	5.09
NM_001024856	Ttbk2	0.21	0.524	-0.088	0.058	-0.233	0.284	0.058	0.066	3.055	2.483	3.87	3.104	3.094
NM_001024857	Ttbk2	-0.128	0.277	0.157	0.152	-0.365	0.919	0.168	0.489	2.644	2.711	3.954	2.917	2.435
NM_001024910	2020-09-10	2.066	3.522	0.522	0.263	1.371	1.621	1.118	1.486	4.151	0.957	3.543	8.932	5.761
NM_001024911	2020-09-10	-0.209	0.658	0.316	0.385	-0.134	0.148	-0.096	0.127	17.593	19.039	18.722	16.074	12.128
NM_001024917	N4bp2	0.636	8.204	0.02	0.014	0.292	0.831	0.129	0.285	22.541	13.611	20.853	24.203	22.322
NM_001024918	Rfx4	NA	NA	-3.102	NA	NA	NA	NA	NA	0	0	0	0	0.011
NM_001024919	Bod1	0.053	0.127	-0.146	0.139	0.078	0.095	-0.07	0.12	35.946	32.608	33.425	33.591	34.73
NM_001024920	Trp53i13	-0.566	3.475	0.166	0.107	-0.189	0.158	0.162	0.195	7.907	11.018	10.354	8.656	7.264
NM_001024922	Ddx49	-0.025	0.038	-0.279	0.499	-0.03	0.026	-0.094	0.156	13.502	12.921	13.278	12.432	14.085
NM_001024926	Cyb5d2	-0.307	0.364	-0.07	0.023	-0.358	0.329	-0.204	0.188	0.997	1.158	1.143	0.849	0.834
NM_001024927	Pitpnm3	-0.418	0.076	0.317	NA	0.503	NA	0.301	0.052	0.013	0.016	0.01	0.014	0.011
NM_001024928	Zfp667	0.813	4.415	0.024	0.01	0.134	0.154	0.109	0.18	2.153	1.152	2.2	2.282	2.109
NM_001024931	Rbfox3	3.923	0.825	NA	NA	NA	NA	-5.595	1.118	0.093	0.007	0.001	0.002	0
NM_001024932	Pilrb2	0.113	0.019	NA	NA	-1.653	NA	-4.267	NA	0.062	0.054	0.01	0	0
NM_001024945	Qsox1	-0.628	8.289	0.135	0.078	-0.599	1.584	0.348	0.782	8.632	12.523	17.192	10.755	9.178
NM_001024950	Zfp563	-0.015	0.014	0.37	0.624	-0.106	0.114	0.218	0.392	0.931	0.886	1.208	1.064	0.77
NM_001024952	Rc3h1	0.335	1.758	0.088	0.091	0.005	0.005	-0.186	0.546	10.865	8.065	9.877	9.358	8.245
NM_001024954	Pbx4	1.561	1.177	0.013	0.001	-0.411	0.065	-1.295	0.43	0.462	0.144	0.268	0.183	0.178
NM_001024955	Pik3r1	-1.09	5.183	-2.328	6.685	1.3	1.536	-0.398	0.531	3.318	6.633	1.075	2.461	11.638
NM_001025067	Lrig2	1.052	18.695	-0.082	0.073	-0.054	0.056	-0.055	0.105	5.984	2.712	6.22	5.646	5.602
NM_001025074	Ntrk2	-1.602	0.593	1.677	NA	-0.792	NA	-2.715	0.413	0.025	0.07	0.008	0.003	0.001
NM_001025083	Rhox12	-0.948	NA	NA	NA	NA	NA	NA	NA	0	0.01	0	0	0
NM_001025084	Rhox1	NA	NA	NA	NA	NA	NA	NA	NA	0	0	0	0	0
NM_001025085	Gm5797	NA	NA	NA	NA	NA	NA	NA	NA	0	0	0	0	0
NM_001025086	Rhox7a	NA	NA	1.074	NA	1.141	NA	1.107	NA	0	0	0	0.011	0
NM_001025093	Atf2	-0.235	0.604	-0.11	0.078	-0.174	0.188	-0.232	0.397	4.62	5.1	4.611	3.847	3.884
NM_001025102	Arl14ep	0.018	0.034	-0.21	0.434	-0.02	0.025	-0.288	1.245	14.851	13.747	12.773	11.918	12.902
NM_001025103	Cracr2b	0.197	0.13	0.36	0.252	-0.916	1.781	0.577	0.781	1.046	0.856	3.018	1.537	1.123
NM_001025156	Ccdc93	-0.275	2.12	0.179	0.223	0.11	0.188	0.423	2.255	4.115	4.675	5.292	5.425	4.48
NM_001025163	Zfp78	0.034	0.017	0.467	0.194	-0.271	0.135	0.065	0.038	0.346	0.322	0.457	0.353	0.237
NM_001025192	Cxadr	1.567	17.927	-0.752	2.739	0.618	1.398	-0.012	0.015	17.822	5.599	12.003	17.284	27.324
NM_001025240	Gm5346	NA	NA	NA	NA	NA	NA	NA	NA	0	0	0	0	0
NM_001025241.1	Gm20747	NA	NA	NA	NA	NA	NA	NA	NA	0	0	0	0	0
NM_001025241.2	Gm20747	NA	NA	NA	NA	NA	NA	NA	NA	0	0	0	0	0
NM_001025241.3	Gm20747	NA	NA	NA	NA	NA	NA	NA	NA	0	0	0	0	0
NM_001025241	Gm20747	NA	NA	NA	NA	NA	NA	NA	NA	0	0	0	0	0
NM_001025244	Krtap31-2	NA	NA	NA	NA	NA	NA	NA	NA	0	0	0	0	0
NM_001025245	Mbp	0.806	4.501	-1.284	0.936	-0.413	0.299	-3.197	37.917	2.343	1.255	0.349	0.252	0.577
NM_001025246	Trp53i11	1.79	19.181	-0.772	1.415	-0.009	0.005	-1.339	5.261	18.004	4.907	7.394	6.964	11.198
NM_001025250	Vegfa	-0.581	1.311	-0.569	0.628	-0.162	0.17	0.272	0.37	1.013	1.422	1.423	1.206	1.677
NM_001025251	Mbp	NA	NA	NA	NA	NA	NA	NA	NA	0.001	0	0	0	0
NM_001025254	Mbp	0.976	NA	NA	NA	NA	NA	-0.816	NA	0.006	0.001	0	0	0
NM_001025255	Mbp	0.976	NA	NA	NA	NA	NA	-0.816	NA	0.005	0	0	0	0
NM_001025256	Mbp	-0.948	NA	NA	NA	NA	NA	NA	NA	0	0.004	0	0	0
NM_001025257	Vegfa	0.552	4.034	-0.774	1.207	0.248	0.335	0.104	0.137	6.92	4.435	6.44	7.312	11.713
NM_001025258	Mbp	1.221	NA	NA	NA	-1.61	NA	-2.022	NA	0.01	0.004	0.009	0	0
NM_001025259	Mbp	NA	NA	NA	NA	NA	NA	NA	NA	0	0	0	0	0
NM_001025260	H2al1e	-0.948	NA	-1.539	NA	NA	NA	NA	NA	0.005	0.011	0	0	0.03
NM_001025261	Tpd52	0.215	NA	-0.821	NA	0.675	NA	-0.828	NA	0.009	0.007	0.004	0.004	0.009
NM_001025262	Tpd52	-0.44	0.92	-0.214	0.042	0.692	0.535	-0.016	0.008	1.304	1.649	0.835	1.254	1.389
NM_001025263	Tpd52	1.276	0.635	0.08	0.01	0.219	0.037	-0.097	0.023	0.136	0.053	0.114	0.124	0.109
NM_001025264	Tpd52	0.799	0.368	-0.091	0.016	-0.773	0.534	-0.239	0.101	0.147	0.079	0.223	0.123	0.125
NM_001025286	Nkain2	NA	NA	1.074	NA	1.141	NA	1.107	NA	0	0	0	0.007	0
NM_001025296	Dffa	0.107	0.222	0.187	0.137	-0.236	0.348	-0.068	0.086	5.062	4.426	5.873	4.736	3.89
NM_001025305	Tfap2b	-5.788	29.14	2.165	0.692	1.606	0.496	3.095	3.175	0.023	1.107	0.061	0.183	0.038
NM_001025307	Stx3	0.574	1.38	-0.435	0.159	0.065	0.022	-0.715	0.649	2.015	1.27	1.203	1.206	1.519
NM_001025309	Pja2	-0.508	7.128	0.62	5.497	-0.201	0.515	0.49	4.137	17.138	22.91	28.706	23.625	14.349
NM_001025310	St6galnac6	-0.286	0.341	0.3	0.12	-0.868	1.011	0.052	0.028	2.044	2.335	3.986	2.075	1.579
NM_001025311	St6galnac6	1.385	0.367	1.176	0.47	0.812	0.45	1.076	0.326	0.518	0.184	0.656	1.083	0.441
NM_001025312	Dclre1b	0.264	0.158	-0.541	0.681	1.101	2.031	0.895	1.612	0.677	0.533	0.611	1.237	1.674
NM_001025313	Tapbp	0.113	0.136	0.739	2.37	-0.871	4.676	0.988	6.58	4.106	3.54	15.365	7.991	4.486
NM_001025351	Defb46	NA	NA	NA	NA	NA	NA	NA	NA	0	0	0	0	0
NM_001025353	Gm6040	NA	NA	NA	NA	NA	NA	NA	NA	0	0	0	0	0
NM_001025358	Klc1	-0.672	0.22	-0.077	NA	-1.063	NA	-0.53	0.099	0.07	0.106	0.107	0.049	0.049
NM_001025359	Klc1	-0.409	2.488	-0.193	0.145	-0.527	1.55	-0.219	0.564	6.847	8.567	8.724	5.765	6.145
NM_001025360	Klc1	-0.327	1.764	-0.01	0.003	-0.4	0.772	-0.58	1.794	10.111	11.933	9.249	6.622	6.231
NM_001025361	Klc1	-2.626	1.972	-0.852	NA	-2.577	NA	-0.947	0.145	0.041	0.226	0.13	0.021	0.033
NM_001025362	Klc1	-0.08	0.032	-0.253	0.088	-0.554	0.467	0.683	0.471	1.734	1.71	4.261	2.753	3.058
NM_001025363	Klc1	0.879	0.349	0.783	0.317	1.671	1.965	3.071	3.677	0.431	0.214	1.156	3.542	1.916
NM_001025364	Rtn2	-0.487	0.182	1.94	0.536	-0.941	0.872	0.384	0.16	0.607	0.813	1.564	0.78	0.199
NM_001025365	Miip	0.218	0.44	-0.033	0.02	0.298	0.719	-0.137	0.268	7.672	6.24	5.861	6.846	6.537
NM_001025371	Serinc4	0.176	0.011	-5.2	NA	-3.924	NA	-4.041	NA	0.039	0.035	0.035	0.002	0.077
NM_001025372	Adcyap1r1	-6.792	16.234	-0.581	0.169	-0.942	0.698	4.091	3.87	0.008	0.803	0.258	0.128	0.176
NM_001025373	Zfp943	0.113	0.177	0.213	0.229	0.379	0.599	0.262	0.45	7.393	6.43	7.081	8.696	7.006
NM_001025375	Wdr61	0.5	4.879	-0.576	0.817	-0.361	0.453	-0.794	2.641	20.79	13.807	15.881	11.723	16.411
NM_001025376	Wdr61	-0.307	0.232	-0.145	0.038	0.354	0.158	-0.12	0.056	2.066	2.408	1.543	1.859	1.945
NM_001025378	Orc2	-0.51	0.23	-2.436	1.577	-2.36	1.546	-0.82	0.26	0.134	0.177	0.401	0.072	0.368
NM_001025379	Sema3g	1.163	4.998	-2.576	3.65	0.181	0.058	-3.514	20.712	2.781	1.179	0.221	0.236	1.34
NM_001025380	Adam39	NA	NA	NA	NA	NA	NA	NA	NA	0	0	0	0	0
NM_001025381	Gpr17	-1.003	0.181	1.074	NA	-2.51	NA	-2.599	NA	0.013	0.025	0.013	0.002	0
NM_001025382	Fam196b	3.941	21.537	3.19	8.057	-0.487	0.553	-0.164	0.156	2.733	0.163	3.556	2.392	0.24
NM_001025383.1	Gm14685	1.665	0.468	0.205	NA	-0.88	NA	-4.588	1.166	0.176	0.049	0.011	0.007	0.005
NM_001025383	Gm14685	1.517	0.35	0.847	NA	-0.234	NA	-3.134	0.943	0.098	0.031	0.011	0.01	0.005
NM_001025384.1	DXBay18	1.773	NA	NA	NA	-0.782	NA	-4.048	NA	0.036	0.01	0.002	0.001	0.001
NM_001025384	DXBay18	1.466	NA	NA	NA	-0.782	NA	-3.185	NA	0.02	0.006	0.002	0.002	0.001
NM_001025385	Tas2r137	2.816	NA	2.489	NA	2.556	NA	-0.273	NA	0.037	0	0	0.029	0
NM_001025386	Olfr243	NA	NA	NA	NA	NA	NA	NA	NA	0	0	0	0	0
NM_001025388.1	Eno1b	-3.149	NA	0.11	0.012	3.433	2.45	11.883	8.293	0.004	0.027	1.165	11.919	10.189
NM_001025388	Eno1b	0.16	0.389	-0.745	1.772	-0.011	0.008	-0.38	0.996	197.547	165.393	157.787	148.794	233.772
NM_001025391	Sufu	0.086	0.124	-0.06	0.071	-0.042	0.06	-0.157	0.275	7.988	7.119	7.634	7.04	6.866
NM_001025392	Bclaf1	0.327	4.003	0.119	0.098	0.617	1.821	-0.287	0.685	40.493	30.342	22.415	32.616	27.947
NM_001025393	Bclaf1	0.282	1.847	-0.083	0.056	1.11	8.238	-0.447	2.11	8.343	6.456	2.938	6.018	5.928
NM_001025395	Src	-0.101	0.378	-0.341	0.858	-0.348	1.151	0.182	0.548	14.909	15.025	22.207	16.593	19.655
NM_001025426	Depdc5	0.651	2.077	-0.554	0.679	0.371	0.568	-0.026	0.023	1.065	0.634	0.836	1.025	1.42
NM_001025427	Hmga1	1.126	10.576	-1.02	6.003	0.417	1.435	-0.561	3.003	43.27	18.525	22.735	28.768	54.765
NM_001025428	Spag9	0.768	1.121	-0.511	0.174	0.221	0.064	-1.322	1.55	0.312	0.174	0.113	0.121	0.163
NM_001025429	Spag9	0.741	1.069	-0.586	0.136	-0.133	0.029	-1.613	1.487	0.318	0.181	0.119	0.101	0.142
NM_001025430	Spag9	1.144	5.634	-0.7	0.783	0.18	0.093	-1.254	4.2	2.06	0.884	0.798	0.844	1.287
NM_001025431	Btbd3	-0.377	2.153	0.077	0.091	-0.474	2	0.077	0.147	7.065	8.648	10.746	7.311	6.486
NM_001025432	Crebbp	0.341	3.02	0.245	0.217	0.25	0.35	0.276	0.532	20.671	15.337	21.759	24.619	19.348
NM_001025435	BC053393	-2.223	NA	0.013	NA	-0.36	NA	1.104	NA	0.004	0.022	0.014	0.011	0.01
NM_001025438	Camk2d	-2.168	8.099	-0.069	0.028	-0.26	0.233	0.932	1.262	0.403	1.681	0.959	0.752	0.738
NM_001025439	Camk2d	-0.552	0.061	NA	NA	NA	NA	-3.854	NA	0.015	0.02	0	0	0
NM_001025444	Aptx	0.498	1.58	-0.332	0.454	-0.094	0.077	-0.248	0.482	2.246	1.499	2.079	1.852	2.184
NM_001025445	Aptx	0.931	1.582	-0.017	0.007	-0.048	0.031	-0.748	1.995	1.079	0.54	0.686	0.628	0.596
NM_001025559	Sox6	-0.105	0.015	-1.236	0.108	0.106	NA	-1.701	0.298	0.045	0.046	0.013	0.014	0.029
NM_001025560	Sox6	-1.391	0.225	-2.425	NA	-3.988	NA	-2.167	NA	0.006	0.015	0.022	0.001	0.006
NM_001025561	Pus1	0.406	0.172	-0.962	0.786	-0.408	0.194	-0.232	0.096	0.486	0.341	0.572	0.406	0.732
NM_001025562	Pus1	0.41	0.557	-0.572	0.609	0.153	0.08	-1.201	3.028	6.537	4.69	2.637	2.787	3.892
NM_001025565	Lhx9	-1.838	NA	NA	NA	NA	NA	NA	NA	0	0.003	0	0	0
NM_001025567	Dmbx1	NA	NA	1.074	NA	1.141	NA	1.107	NA	0	0	0	0.001	0
NM_001025568	Pde1c	4.088	3.475	0.966	0.506	0.107	0.029	-0.213	0.076	0.107	0.006	0.091	0.091	0.043
NM_001025570	Prrx1	-0.483	0.536	-2.027	1.037	0.743	0.415	-1.429	2.122	0.817	1.082	0.186	0.296	1.11
NM_001025571	Sh2d2a	1.926	NA	0.229	NA	-0.328	NA	-0.822	NA	0.008	0.002	0.004	0.004	0.002
NM_001025572	Ankrd12	-0.165	0.658	0.761	1.599	0.148	0.137	1.289	7.21	3.92	4.134	8.971	9.422	5.182
NM_001025573	Slc23a4	0.629	0.246	-0.429	0.072	-0.8	0.252	-0.789	0.329	0.203	0.125	0.208	0.116	0.143
NM_001025574	Bpifb9b	-0.948	NA	0.112	NA	1.141	NA	1.107	NA	0.002	0.004	0.002	0.004	0.005
NM_001025575	Cfhr2	-2.093	0.727	1.956	NA	0.116	NA	-1.737	NA	0.047	0.183	0.014	0.014	0
NM_001025576	Ccdc141	-2.257	31.101	-0.86	1.252	0.521	0.541	-0.48	0.751	0.496	2.214	0.254	0.348	0.595
NM_001025577	Maf	0.039	0.054	-1.652	1.98	-0.882	2.812	-1.296	7.482	8.515	7.78	6.611	3.404	9.845
NM_001025581	Kcnc2	-2.565	1.934	2.263	0.614	0.106	0.023	1.74	0.639	0.048	0.264	0.156	0.155	0.031
NM_001025582	Dram2	0.82	0.472	0.871	0.124	1.058	0.368	0.257	0.083	0.277	0.149	0.165	0.321	0.169
NM_001025584	Kcnj6	NA	NA	NA	NA	-1.67	NA	NA	NA	0	0	0.008	0	0
NM_001025585	Kcnj6	-0.948	NA	NA	NA	NA	NA	NA	NA	0	0.005	0	0	0
NM_001025586	Nr2c2ap	0.578	1.165	-0.694	1.003	-0.221	0.132	-0.218	0.191	5.564	3.523	5.695	4.691	7.127
NM_001025587	Nr2c2ap	NA	NA	NA	NA	NA	NA	NA	NA	0	0.002	0	0.001	0
NM_001025589	Rfxank	-0.191	0.57	-0.056	0.035	-0.322	0.572	-0.116	0.188	3.953	4.234	4.691	3.571	3.482
NM_001025590	Kcnj6	NA	NA	-2.648	NA	1.141	NA	1.107	NA	0	0	0	0.003	0.017
NM_001025594	Zbtb43	1.026	8.146	-0.486	0.467	-0.414	0.487	-1.801	12.379	3.483	1.598	1.383	0.981	1.29
NM_001025597	Ikzf1	-0.3	0.141	-1.465	0.643	-0.869	0.279	-1.972	1.945	0.225	0.262	0.108	0.056	0.144
NM_001025599	Trim26	0.075	0.162	-0.062	0.037	-0.147	0.147	-0.606	4.509	7.198	6.445	5.358	4.641	4.51
NM_001025600	Cadm1	0.16	0.186	1.714	1.041	-1.235	0.918	-0.69	0.444	2.712	2.274	4.165	1.632	0.471
NM_001025602	Il1rl1	0.503	0.267	-0.529	0.169	0.223	0.066	-0.372	0.165	0.152	0.1	0.104	0.115	0.154
NM_001025605	Gm527	0.011	0.008	1.411	1.982	-0.404	0.313	-0.781	1.458	2.017	1.888	1.622	1.155	0.405
NM_001025606	Tmem171	-1.804	2.082	-0.172	0.068	-0.622	0.596	2.665	5.439	0.217	0.715	2.183	1.355	1.421
NM_001025607	Gm5168	NA	NA	NA	NA	NA	NA	NA	NA	0	0	0	0	0
NM_001025608	Szrd1	0.372	2.128	-0.197	0.248	-0.026	0.042	-0.224	0.824	16.297	11.872	14.669	13.677	14.621
NM_001025610	Ms4a7	-3.675	NA	-2.999	NA	-2.478	NA	1.107	NA	0	0.048	0.05	0.009	0.06
NM_001025612	Snx22	0.093	0.063	-0.757	0.568	-0.241	0.118	-1.295	2.551	0.935	0.829	0.462	0.372	0.585
NM_001025613	Otud7b	-0.414	1.328	0.241	0.263	0.092	0.098	0.47	1.138	2.476	3.097	3.305	3.362	2.66
NM_001025614	Otud7b	-0.332	3.033	0.027	0.027	-0.268	1.085	0.129	0.427	6.852	8.125	9.345	7.351	6.744
NM_001025615	Ccdc50	0.387	1.154	-0.038	0.016	-0.333	0.246	-0.884	2.847	6.289	4.497	4.492	3.322	3.209
NM_001025617	Cant1	-0.6	3.568	-0.197	0.078	-0.572	0.453	-0.826	1.241	6.918	9.859	5.949	3.812	4.132
NM_001025618	Cant1	-0.581	0.695	-0.523	0.587	-0.577	0.619	0.333	0.301	1.222	1.694	2.389	1.507	2.023
NM_001025779	Cdc6	-0.026	0.037	0.028	0.011	1.293	5.915	-0.481	1.655	7.688	7.384	2.336	5.42	4.927
NM_001025947	Dnm1l	-0.041	0.121	0.152	0.195	0.187	0.327	-0.129	0.272	25.706	24.81	21.39	23.086	19.378
NM_001026211	Dnajc19	-0.262	0.214	0.124	0.036	0.519	0.4	0.239	0.17	1.088	1.218	0.925	1.262	1.085
NM_001026212	Ensa	0.149	1.31	-0.02	0.013	-0.261	0.538	-0.686	5.236	48.729	41.342	37.393	29.681	28.175
NM_001026214	Entpd5	-0.387	1.625	0.321	0.245	-0.203	0.205	-0.692	2.927	2.304	2.827	1.699	1.399	1.052
NM_001029836	Npnt	-0.697	1.184	-0.208	0.058	-0.201	0.101	-1.612	3.472	1.707	2.625	0.658	0.545	0.586
NM_001029837	Pik3cd	-0.089	0.023	-0.494	0.053	-0.126	0.015	-1.507	0.477	0.231	0.22	0.087	0.077	0.104
NM_001029838	Pknox2	-1.044	7.73	0.997	1.334	0.195	0.2	0.253	0.398	2.402	4.683	2.594	2.815	1.308
NM_001029841	Sla	-0.835	0.614	0.217	NA	0.213	NA	-3.399	2.424	0.191	0.321	0.015	0.018	0.014
NM_001029842	Slc16a6	1.898	5.561	-2.15	3.444	0.956	0.653	-0.503	0.58	1.079	0.27	0.414	0.747	3.122
NM_001029843	Vrk1	0.294	0.855	-0.725	1.898	0.337	0.31	-1.338	15.49	6.116	4.696	1.999	2.372	3.664
NM_001029844	Vrk1	0.37	2.781	-0.323	0.844	0.877	8.877	0.033	0.066	8.9	6.484	5.132	8.933	10.458
NM_001029850	Magi1	-0.123	0.204	0.078	0.057	-0.363	0.47	-0.397	1.06	2.301	2.352	2.336	1.712	1.516
NM_001029855	Psme2	-0.396	0.181	0.689	0.116	0.147	0.018	-0.633	0.217	0.807	0.988	0.484	0.501	0.293
NM_001029856	Atad5	0.237	1.274	0.118	0.14	1.214	9.919	0.192	0.638	9.67	7.733	4.942	10.849	9.345
NM_001029867	Ugt2b36	NA	NA	NA	NA	NA	NA	NA	NA	0	0	0	0	0
NM_001029868	Pdzd4	-0.534	7.142	-0.697	2.31	-0.125	0.181	-0.879	8.281	7.835	10.659	4.803	4.172	6.324
NM_001029872	Itgad	0.336	NA	-0.849	NA	NA	NA	-2.022	NA	0.006	0.004	0	0	0.002
NM_001029873	Unc13a	-0.24	0.095	1.303	3.157	-1.263	4.952	2.591	8.254	0.064	0.071	0.963	0.383	0.144
NM_001029876	Urb2	0.211	0.9	-0.339	1.338	0.338	1.711	0.058	0.14	6.157	5.02	5.238	6.296	7.436
NM_001029877	Nova2	-1.562	4.594	-0.527	0.263	-0.389	0.247	-0.01	0.005	0.183	0.511	0.243	0.179	0.242
NM_001029878	Lonrf2	1.34	17.891	0.022	0.005	-0.44	0.272	-4.626	107.392	5.612	2.073	0.321	0.222	0.207
NM_001029889	Usf3	0.219	1.028	0.278	0.294	0.419	0.785	0.534	1.681	7.402	5.965	8.308	10.534	8.1
NM_001029890	Mex3a	0.596	15.483	-0.44	1.847	0.505	3.598	0.036	0.078	58.711	36.49	43.906	59.152	74.963
NM_001029893	Psg26	NA	NA	NA	NA	NA	NA	NA	NA	0	0	0	0	0
NM_001029895	Ate1	0.235	0.226	0.041	0.012	-0.215	0.151	-0.744	1.323	0.635	0.511	0.458	0.373	0.339
NM_001029912	Zswim5	1.161	12.591	-0.467	0.971	0.277	0.431	-0.759	5.358	2.966	1.242	1.498	1.72	2.229
NM_001029929	Zmynd15	1.734	0.645	-1.647	0.443	1.839	NA	-0.793	0.196	0.138	0.036	0.023	0.075	0.228
NM_001029930	Gm5796	1.224	1.806	-0.84	0.26	-0.3	0.076	-2.395	4.347	0.888	0.363	0.214	0.171	0.277
NM_001029933	Zfp114	0.25	0.479	-0.039	0.016	0.259	0.237	-1.1	4.179	2.242	1.772	0.902	1.025	0.981
NM_001029934	Usp32	0.348	2.989	0.21	0.405	-0.122	0.207	0.601	5.506	7.769	5.729	13.306	11.566	9.347
NM_001029935	Trim38	-0.173	NA	-1.496	NA	-0.692	NA	-1.136	NA	0.017	0.019	0.012	0.007	0.02
NM_001029936	Specc1	-0.966	13.956	-0.251	0.526	0.488	2.407	1.461	23.651	2.002	3.673	4.055	5.417	6.024
NM_001029937	Sec14l3	NA	NA	-2.114	NA	-0.782	NA	NA	NA	0	0	0.002	0	0.006
NM_001029938	Rilp	-0.247	0.059	0.448	0.075	-0.597	0.175	0.46	0.123	0.154	0.17	0.328	0.209	0.141
NM_001029977	Gm4788	-2.833	NA	NA	NA	NA	NA	NA	NA	0.003	0.012	0.001	0	0
NM_001029978	Tceal3	3.293	45.156	1.451	2.412	0.256	0.235	0.489	0.894	9.614	0.932	11.597	13.289	4.532
NM_001029979	Safb2	0.153	0.724	-0.036	0.021	0.451	1.14	-0.223	0.479	28.083	23.814	18.168	23.674	22.608
NM_001029982	Sec23ip	-0.379	5.258	-0.141	0.187	0.147	0.28	0.333	1.332	15.62	19.095	18.401	19.349	19.891
NM_001029983	Man1b1	-0.187	1.873	0.014	0.007	-0.312	0.669	-0.476	2.205	24.436	26.137	22.525	17.213	15.947
NM_001029984	Fcrlb	-2.004	0.385	-4.961	3.235	2.573	NA	-0.01	NA	0.024	0.087	0	0.023	0.701
NM_001029985	Kcp	-1.599	21.619	-2.448	13.83	-0.798	1.748	-0.937	2.954	3.124	8.945	2.926	1.598	8.223
NM_001029987	Doxl2	NA	NA	-0.849	NA	NA	NA	NA	NA	0	0	0	0	0.003
NM_001029988	Fat2	1.003	0.676	-6.677	10.487	0.818	NA	-2.862	3.037	0.058	0.028	0.005	0.008	0.731
NM_001029990	Mettl17	0.747	5.942	-0.549	1.488	-0.047	0.047	-0.996	8.734	9.01	5.062	4.818	4.43	6.059
NM_001029993	Zc3h18	-0.077	0.137	-0.207	0.32	0.308	0.836	0.565	2.532	8.182	8.143	10.075	11.89	12.784
NM_001029994	Zc3h18	0.345	3.908	-0.286	0.61	0.513	2.5	-0.028	0.051	25.991	19.241	18.445	25.081	28.524
NM_001030014	Mcat	-0.034	0.048	-0.246	0.134	-0.498	0.546	-0.481	0.738	8.832	8.51	9.18	6.185	6.883
NM_001030274	Ndufs5	0.171	0.678	0.046	0.039	-0.067	0.102	0.157	0.442	66.153	55.144	79.799	72.329	65.475
NM_001030290	Rdh8	NA	NA	NA	NA	NA	NA	NA	NA	0	0	0	0	0
NM_001030292	Kcnk15	NA	NA	NA	NA	-0.782	NA	NA	NA	0	0	0.01	0	0
NM_001030293	Spry3	NA	NA	NA	NA	NA	NA	NA	NA	0	0	0	0	0
NM_001030296	Prr7	0.514	0.969	-0.972	1.774	-0.637	0.859	0.017	0.01	3.726	2.443	6.042	3.687	6.789
NM_001030297	Tmprss11c	NA	NA	NA	NA	NA	NA	NA	NA	0	0	0	0	0
NM_001030305	Pmp2	NA	NA	NA	NA	-0.782	NA	NA	NA	0	0	0.008	0	0
NM_001030307	Dkc1	0.395	4.581	-0.579	2.569	0.772	7.715	-0.861	13.22	41.254	29.407	13.777	22.254	31.16
NM_001031621	Abca17	NA	NA	-0.849	NA	-0.782	NA	NA	NA	0	0	0.002	0	0.001
NM_001031622.1	Gm16367	NA	NA	NA	NA	NA	NA	NA	NA	0	0	0	0	0
NM_001031622.2	Gm16367	NA	NA	NA	NA	NA	NA	NA	NA	0	0	0	0	0
NM_001031622.3	Gm16367	NA	NA	NA	NA	NA	NA	NA	NA	0	0	0	0	0
NM_001031622.4	Gm16367	NA	NA	NA	NA	NA	NA	NA	NA	0	0	0	0	0
NM_001031622.5	Gm16367	NA	NA	NA	NA	NA	NA	NA	NA	0	0	0	0	0
NM_001031622.6	Gm16367	NA	NA	NA	NA	NA	NA	NA	NA	0	0	0	0	0
NM_001031622	Gm16367	NA	NA	-0.849	NA	NA	NA	NA	NA	0	0	0	0	0.003
NM_001031664	Nudt10	0.342	0.899	-0.299	0.211	-0.12	0.081	-0.38	0.538	3.962	2.939	3.421	2.98	3.435
NM_001031667	Gsk3a	0.062	0.233	-0.14	0.175	0.373	1.524	0.432	2.541	40.607	36.513	43.682	53.881	55.337
NM_001031772	Lin28b	-1.377	2.395	-1.548	1.083	1.317	NA	-1.907	1.92	0.225	0.551	0.025	0.059	0.162
NM_001031808	Mrpl41	0.158	0.384	0.266	0.319	0.242	0.486	0.327	0.894	7.683	6.476	8.401	9.488	7.345
NM_001031811	Kcnh8	-1.358	0.37	-4.452	6.946	1.4	NA	0.218	0.03	0.024	0.059	0.011	0.028	0.588
NM_001031814	Smg1	0.152	0.673	-0.198	0.532	0.071	0.13	-0.054	0.118	16.828	14.206	15.979	15.89	17.044
NM_001031851	Agxt2	-1.82	NA	1.074	NA	-0.648	NA	1.107	NA	0	0.011	0.009	0.005	0
NM_001032298	Bglap2	0.976	NA	0.112	NA	0.18	NA	0.145	NA	0.013	0	0.012	0.013	0.016
NM_001032378	Pecam1	-5.631	4.159	-2.68	NA	-4.726	NA	-4.715	1.046	0.092	4.285	0.095	0.005	0.021
NM_001032413	Pear1	-2.179	3.063	-0.448	0.281	-1.084	1.942	-0.643	0.464	1.181	5.055	1.639	0.746	0.952
NM_001032414	Pear1	-1.595	11.427	-0.023	0.005	-1.025	1.629	-1.359	3.52	1.183	3.363	0.978	0.451	0.433
NM_001032727	Sybu	-0.032	NA	NA	NA	NA	NA	-3.041	NA	0.016	0.015	0	0	0
NM_001033039	Klhdc9	1.224	1.479	0.808	0.159	-0.38	0.09	-1.612	1.229	0.779	0.311	0.34	0.25	0.132
NM_001033040	Ccdc189	1.167	5.96	1.267	2.939	0.047	0.032	-0.56	1.358	2.399	1	1.629	1.603	0.624
NM_001033041	Acmsd	-0.743	0.261	-0.041	0.005	0.276	NA	-0.31	0.085	0.135	0.203	0.094	0.108	0.1
NM_001033042	Lrrc14b	0.184	0.193	-0.259	0.287	0.02	0.013	0.208	0.288	1.694	1.391	2.004	1.915	2.146
NM_001033043	Rnf17	-0.213	0.07	-0.173	NA	-0.399	NA	-2.692	1.027	0.082	0.09	0.018	0.013	0.013
NM_001033122	Cd69	0.126	0.048	NA	NA	NA	NA	-7.085	4.973	0.485	0.415	0	0	0
NM_001033123.1	Gm14288	3.875	NA	NA	NA	NA	NA	-3.719	NA	0.181	0	0	0	0
NM_001033123.2	Gm14288	1.876	NA	NA	NA	NA	NA	-1.72	NA	0.054	0	0	0	0
NM_001033123	Gm14288	3.682	NA	NA	NA	NA	NA	-3.526	NA	0.146	0	0	0	0
NM_001033124	Ntrk1	-0.811	0.399	0.82	NA	0.406	NA	-2.868	2.156	0.209	0.352	0.023	0.028	0.016
NM_001033126	Cd27	NA	NA	NA	NA	NA	NA	NA	NA	0	0	0	0	0
NM_001033128	Bbs1	0.908	7.121	0.744	3.334	-0.023	0.029	-0.204	0.441	5.412	2.703	4.927	4.615	2.564
NM_001033131	Krtdap	-0.688	0.095	-1.31	0.178	-0.772	NA	0.743	0.085	0.127	0.188	0.359	0.194	0.472
NM_001033132	Commd6	0.342	1.562	0.214	0.206	-0.262	0.43	-0.166	0.334	17.866	13.211	19.63	15.581	12.604
NM_001033135	Rnf149	0.599	8.35	0.354	1.872	-0.229	0.722	0.899	18.388	20.854	12.927	47.237	38.158	27.901
NM_001033136	Rmdn3	0.409	4.342	0.053	0.055	0.138	0.374	-0.235	1.156	17.379	12.298	13.869	14.502	13.039
NM_001033139	Spindoc	0.041	0.103	-0.145	0.189	-0.05	0.065	-0.201	0.662	12.02	11.01	11.164	10.257	10.599
NM_001033140	Sdhaf1	0.101	0.141	0.054	0.038	-0.026	0.017	0.271	0.578	11.757	10.302	14.775	13.951	12.521
NM_001033141	Ecscr	-4.74	13.845	1.44	0.588	-0.544	0.218	1.989	1.201	0.125	3.084	0.729	0.485	0.165
NM_001033142	Rnf166	-0.186	0.609	0.217	0.252	-0.246	0.572	-0.079	0.145	11.294	12.089	13.068	10.497	8.417
NM_001033145	1190002N15Rik	-0.142	0.511	1.554	14.942	-0.28	0.328	0.745	4.73	18.461	19.167	39.017	30.356	9.648
NM_001033148	1700029J07Rik	1.213	2.141	0.61	0.492	0.514	0.363	-0.834	1.036	1.899	0.767	0.777	1.045	0.634
NM_001033149	Ttc9	-0.597	0.494	-1.007	0.553	-0.796	0.706	2.256	4.603	0.156	0.221	1.32	0.73	1.379
NM_001033150	Plekhm2	-0.435	1.386	-0.039	0.024	-0.515	1.072	0.315	0.636	1.833	2.333	3.341	2.236	2.152
NM_001033155	Dnajb14	-0.428	1.82	0.648	2.497	-0.136	0.229	0.879	6.754	4.545	5.756	9.526	8.206	4.884
NM_001033156	Fbxo33	0.44	2.649	0.08	0.06	-0.077	0.087	-0.168	0.354	7.646	5.306	7.452	6.662	5.921
NM_001033157	5730507C01Rik	0.151	0.206	-0.266	0.446	0.323	0.445	0.019	0.016	6.957	5.888	5.852	6.905	7.745
NM_001033158	Rasl12	-1.314	4.102	1.057	0.797	-0.877	0.878	-1.303	2.742	1.045	2.463	0.797	0.416	0.186
NM_001033159	Zfp597	-0.168	0.506	0.124	0.114	-0.156	0.244	-0.344	1.218	3.428	3.626	3.119	2.646	2.276
NM_001033161	Tradd	-0.106	0.107	-0.172	0.075	-0.848	1.301	-0.704	1.248	3.257	3.301	3.689	1.958	2.059
NM_001033162	Shcbp1l	0.206	0.067	-0.29	0.042	0.009	NA	-1.216	0.591	0.203	0.164	0.09	0.085	0.099
NM_001033163	Ephx3	NA	NA	0.3	NA	0.189	NA	1.985	NA	0	0.001	0.008	0.008	0.008
NM_001033164	2510002D24Rik	0.062	0.086	-0.308	0.259	0.13	0.138	-0.569	2.079	6.226	5.592	3.959	4.119	4.739
NM_001033165	Dnajc25	-0.438	1.41	-0.259	0.5	0.398	1.419	0.623	2.697	5.39	6.902	6.53	8.155	9.129
NM_001033166	Selenoh	-0.175	0.836	-0.384	0.384	0.228	0.256	-0.474	1.198	77.667	82.53	49.192	54.742	66.903
NM_001033167	Slc22a23	0.034	0.04	-1.135	2.5	0.361	0.386	-0.911	2.944	1.103	1.012	0.473	0.574	1.189
NM_001033168	1700066B19Rik	-0.659	NA	-0.182	0.035	-0.377	0.136	3.801	2.986	0.019	0.03	0.35	0.258	0.272
NM_001033170	Fam83e	0.418	0.105	-0.227	0.049	0.31	0.091	1.371	0.721	0.091	0.066	0.197	0.235	0.255
NM_001033171	Klrg2	0.499	0.241	-1.272	0.889	-0.515	0.253	0.316	0.142	0.25	0.166	0.46	0.303	0.697
NM_001033172	Rab11fip2	-0.323	2.137	-1.125	1.265	0.294	0.417	0.306	0.658	3.264	3.839	3.42	3.972	8.137
NM_001033173	Usp31	0.452	3.779	-0.162	0.201	0.193	0.42	0.122	0.331	5.658	3.888	5.591	6.038	6.333
NM_001033174	Osbp	-0.074	0.372	0.13	0.303	-0.116	0.385	0.289	2.702	18.111	17.947	24.788	21.717	18.542
NM_001033175	Cln6	-0.441	2.369	0.682	3.508	0.219	0.526	-0.091	0.171	13.308	16.923	11.1	12.243	7.137
NM_001033176	Slc6a21	NA	NA	0.371	NA	2.095	NA	2.065	NA	0	0	0	0.013	0.009
NM_001033177	Krt76	NA	NA	-4.573	8.98	4.365	NA	4.332	NA	0	0	0	0.045	0.989
NM_001033178	Tmem181a	-0.846	17.786	0.432	1.092	-0.392	1.011	0.018	0.025	6.612	11.204	9.127	6.555	4.556
NM_001033181	Jrkl	-0.096	0.174	0.258	0.548	0.041	0.035	0.51	2.498	3.823	3.846	5.509	5.345	4.181
NM_001033184	1700057G04Rik	NA	NA	-2.339	NA	NA	NA	NA	NA	0	0	0	0	0.026
NM_001033185	Ccdc190	-1.803	NA	NA	NA	-1.729	NA	NA	NA	0.002	0.014	0.016	0.005	0.003
NM_001033186	Skap1	2.111	2.117	-0.942	0.127	0.883	0.11	-2.026	0.921	0.981	0.21	0.14	0.24	0.43
NM_001033189	C77080	0.452	0.539	0.341	0.865	-0.523	2.056	3.084	64.481	1.023	0.697	12.815	8.512	6.296
NM_001033191	Naa11	NA	NA	NA	NA	NA	NA	NA	NA	0	0	0	0	0
NM_001033192	Fam8a1	0.259	1.22	0.142	0.116	-0.45	1.101	-0.217	0.419	17.789	13.959	21.623	14.968	12.75
NM_001033194	Gtf3c3	0.201	1.381	-0.072	0.101	0.057	0.082	-0.046	0.116	11.97	9.784	11.568	11.373	11.187
NM_001033196	Znfx1	0.076	0.133	0.462	1.059	-0.568	2.867	0.567	3.043	2.627	2.351	5.947	3.827	2.584
NM_001033197	AU015228	NA	NA	NA	NA	NA	NA	NA	NA	0	0	0	0	0
NM_001033199	Clca4b	-1.82	NA	NA	NA	NA	NA	NA	NA	0	0.006	0	0	0
NM_001033201	Ncbp1	0.337	5.575	-0.209	0.553	0.359	2.885	-0.016	0.037	43.118	32.106	34.38	41.901	45.302
NM_001033202	Usp30	0.138	0.441	0.054	0.065	-0.181	0.607	0.418	2.888	10.262	8.771	16.062	13.47	12.109
NM_001033204	Rpusd3	0.195	0.193	-0.306	0.174	-0.509	0.557	-0.04	0.026	2.979	2.471	4.259	2.828	3.283
NM_001033205	Zfp575	-1.089	4.104	0.678	0.574	-0.284	0.205	0.777	1.195	0.919	1.857	1.971	1.558	0.903
NM_001033206	Pwwp2b	-1.178	1.372	1.416	4.247	-0.711	1.704	4.096	28.565	0.512	1.089	14.487	8.512	2.951
NM_001033207	Nlrc5	0.67	0.128	-1	NA	-0.58	NA	-1.257	0.221	0.017	0.01	0.011	0.007	0.013
NM_001033208	Myzap	-2.07	13.596	0.95	0.469	-0.448	0.219	-1.511	2.66	0.861	3.427	0.422	0.296	0.143
NM_001033209	Xylb	0.331	1.458	-0.061	0.022	0.43	0.504	-0.481	0.931	3.761	2.807	2.054	2.654	2.592
NM_001033210	Pls1	1.335	6.244	-1.564	4.635	0.481	0.448	-1.173	4.368	3.222	1.19	1.07	1.396	3.891
NM_001033211	AU022751	0.976	NA	1.932	NA	0.168	NA	1.003	NA	0.004	0	0.01	0.011	0
NM_001033212	Rprml	1.819	0.447	2.397	NA	-1.798	0.746	0.285	0.058	0.156	0.043	0.672	0.186	0.033
NM_001033213	Ttc7b	-0.153	0.531	-0.344	0.501	-0.11	0.21	0.775	7.27	6.752	7.061	12.867	11.348	13.504
NM_001033214	E330034G19Rik	NA	NA	NA	NA	NA	NA	NA	NA	0.001	0	0.001	0.001	0.001
NM_001033215	Zfp957	-1.89	NA	2.608	NA	2.675	NA	2.646	NA	0	0.007	0	0.012	0
NM_001033217	Prickle1	-1.735	16.021	-2.491	25.469	0.474	0.584	-0.445	0.959	3.492	11.031	1.898	2.523	13.312
NM_001033219	Slc45a4	-0.057	0.034	0.023	0.008	-0.453	0.438	0.797	1.273	0.26	0.257	0.634	0.441	0.411
NM_001033220	AU021092	-0.101	0.035	-2.145	2.998	-0.787	0.218	-0.52	0.201	0.454	0.461	0.571	0.31	1.289
NM_001033221	Mpig6b	-0.615	0.128	-0.733	0.152	0.616	NA	0.696	0.161	0.043	0.068	0.049	0.07	0.12
NM_001033222	Pdzd8	-0.22	2.149	0.124	0.12	0.266	0.572	0.542	3.199	16.139	17.658	20.273	23.104	19.794
NM_001033223	Lin7a	1.121	0.157	-0.673	0.214	-0.858	0.446	2.408	1.149	0.023	0.01	0.242	0.127	0.187
NM_001033225	Pnrc1	0.068	0.415	-0.245	0.301	-0.373	1.784	-2.205	120.259	64.22	57.643	18.677	13.68	15.086
NM_001033226	Calr4	3.032	NA	0.112	NA	1.141	NA	-2.872	NA	0.044	0.005	0.002	0.005	0.005
NM_001033227	Slc5a10	-1.467	NA	0.028	NA	2.503	NA	1.498	NA	0.005	0.012	0	0.013	0.012
NM_001033228	Itga1	-2.39	94.25	-0.229	0.112	0.133	0.081	0.153	0.206	1.957	9.641	2.061	2.137	2.323
NM_001033229	Cyp11b1	0.014	NA	NA	NA	NA	NA	-0.816	NA	0.003	0.003	0	0	0
NM_001033231	Mcrip1	-0.428	3.873	0.009	0.006	-0.385	0.702	-0.071	0.119	41.706	52.814	53.226	38.957	36.236
NM_001033233	Tmprss11a	NA	NA	NA	NA	NA	NA	NA	NA	0	0	0	0	0
NM_001033234	Gm9	NA	NA	1.074	NA	1.141	NA	1.107	NA	0	0	0	0.007	0
NM_001033235	Trim40	NA	NA	NA	NA	NA	NA	NA	NA	0	0	0	0	0
NM_001033236	Vcpkmt	0.127	0.276	0.138	0.129	0.274	0.572	0.386	1.232	11.678	10.068	13.058	14.958	12.759
NM_001033237	Yeats2	-0.418	2.782	0.03	0.021	0.181	0.463	-0.077	0.155	4.458	5.61	3.86	4.151	3.794
NM_001033238	Cblb	1.117	27.239	2.077	21.805	-0.033	0.041	1.404	23.365	23.136	10.043	65.012	60.142	13.342
NM_001033239	Csta1	0.795	NA	0.169	NA	0.535	NA	0.552	0.094	0.024	0.013	0.026	0.035	0.028
NM_001033240	Wfdc6a	-2.429	NA	NA	NA	NA	NA	NA	NA	0	0.028	0.005	0	0
NM_001033241	Gm382	NA	NA	NA	NA	NA	NA	NA	NA	0	0	0	0	0
NM_001033242	Cln5	-0.174	0.67	0.851	4.759	-0.243	0.667	0.77	6.523	8.75	9.305	18.271	14.638	7.596
NM_001033244	Fancd2	0.082	0.13	-0.61	0.707	0.857	1.373	-0.798	1.954	2.771	2.459	0.912	1.559	2.232
NM_001033245	Hk3	-0.294	0.173	NA	NA	-2.252	NA	-7.663	6.502	0.364	0.423	0.008	0	0
NM_001033246	Ccdc110	-1.105	NA	-0.628	NA	0.035	NA	0.148	NA	0.007	0.014	0.008	0.007	0.011
NM_001033247	Cfap44	-0.934	0.333	2.071	0.402	-0.366	0.097	0.756	0.248	0.027	0.047	0.061	0.045	0.01
NM_001033248	Gm266	1.892	29.172	0.222	0.142	0.356	0.632	-0.163	0.36	44.298	11.149	31.799	38.819	31.312
NM_001033249	Zfp583	0.026	0.018	0.232	0.132	0.567	0.816	0.746	1.53	1.563	1.454	1.84	2.585	2.052
NM_001033250	Lemd1	1.514	NA	-1.229	NA	-1.479	NA	-0.566	NA	0.028	0.008	0.053	0.019	0.041
NM_001033251	Gpr174	0.976	NA	-0.849	NA	NA	NA	-0.816	NA	0.002	0.001	0.001	0.001	0.002
NM_001033252	Gm732	NA	NA	NA	NA	NA	NA	NA	NA	0	0	0	0	0
NM_001033253	Plekhg1	-0.635	1.725	1.745	0.799	-0.842	0.351	-1.62	1.747	1.018	1.49	0.611	0.321	0.09
NM_001033254	Pak6	-0.259	NA	-0.184	NA	-2.185	NA	1.066	NA	0.006	0.006	0.056	0.011	0.012
NM_001033255	Gm136	0.014	NA	1.695	NA	1.212	NA	2.679	NA	0.006	0.007	0.023	0.05	0.014
NM_001033256	Spata5l1	0.017	0.009	-0.789	0.546	-0.249	0.119	-0.363	0.226	3.432	3.226	3.273	2.606	4.25
NM_001033257	Phactr2	-0.813	13.948	1.14	4.824	-0.148	0.18	0.039	0.045	5.579	9.207	6.566	5.636	2.382
NM_001033258	Arfgef3	0.331	0.384	-1.5	0.972	0.397	0.411	1.144	4.134	0.4	0.301	0.699	0.867	2.321
NM_001033259	Mcu	-1.176	26.395	0.24	0.24	-0.277	1.077	-0.104	0.272	9.027	19.153	10.508	8.25	6.498
NM_001033260	Stox1	0.967	1.361	0.483	0.11	-0.081	0.021	-2.113	4.273	0.578	0.276	0.146	0.133	0.087
NM_001033261	Zfc3h1	0.063	0.197	0.02	0.015	0.009	0.009	0.715	5.327	9.291	8.368	15.692	14.981	13.797
NM_001033262	2020-03-09	0.485	1.661	-0.986	1.216	-0.833	1.1	-0.661	0.96	6.328	4.239	7.342	3.911	7.32
NM_001033263	Agap2	-1.893	1.093	-1.334	NA	-1.43	NA	-0.689	0.082	0.019	0.067	0.032	0.012	0.028
NM_001033264	Gls2	0.175	0.063	-0.262	0.079	1.209	0.534	-0.52	0.307	0.462	0.378	0.14	0.313	0.354
NM_001033266	Gm525	0.014	NA	NA	NA	NA	NA	-0.816	NA	0.013	0.016	0	0	0
NM_001033267	Qrich2	1.168	0.283	1.601	0.49	0.224	0.051	1.085	0.429	0.069	0.029	0.13	0.143	0.043
NM_001033268	Fam120a	-0.302	3.235	0.299	0.711	0.197	0.461	0.715	5.885	60.249	69.744	89.251	97.163	73.69
NM_001033269	Eif4e1b	NA	NA	NA	NA	NA	NA	NA	NA	0	0	0	0	0
NM_001033270	Slc4a7	1.171	28.06	-0.162	0.126	-0.062	0.084	0.363	1.596	8.579	3.573	11.936	10.805	11.355
NM_001033271	Pip4p1	0.267	0.615	-0.477	0.813	-0.559	1.348	0.817	3.345	9.188	7.208	24.59	15.825	20.679
NM_001033272	Spata13	-0.215	0.841	-1.37	2.707	0.352	0.35	-0.288	0.517	3.185	3.48	2.127	2.55	6.222
NM_001033273	5031439G07Rik	-0.411	3.244	-0.552	1.762	-0.024	0.022	0.731	4.952	9.509	11.851	16.535	15.461	21.254
NM_001033274	Brd1	0.282	3.167	0.005	0.005	0.069	0.152	0.12	0.406	25.146	19.484	26.951	26.861	24.996
NM_001033275	Gxylt1	-0.966	6.719	0.323	0.315	0.993	2.121	0.691	1.951	1.149	2.119	0.972	1.826	1.358
NM_001033276	Kmt2d	0.186	0.733	-0.049	0.034	0.152	0.263	0.628	3.334	13.931	11.487	20.04	21.148	20.436
NM_001033277	Spryd3	-0.301	1.136	-0.453	0.625	-0.381	0.78	-0.092	0.145	4.689	5.441	5.894	4.312	5.501
NM_001033279	D17Wsu92e	-0.129	0.644	-0.178	0.326	-0.125	0.393	1.057	23.601	19.908	20.447	46.666	40.644	43.068
NM_001033280	Gm94	NA	NA	NA	NA	NA	NA	NA	NA	0	0	0	0	0
NM_001033281	Prdm6	-1.366	0.629	-1.139	0.261	0.246	NA	0.123	0.021	0.061	0.152	0.057	0.065	0.135
NM_001033283	Oosp3	NA	NA	NA	NA	NA	NA	NA	NA	0	0	0	0	0
NM_001033284	Cryzl2	0.705	4.443	0.698	0.524	-0.764	1.673	-2.088	21.096	6.758	3.895	2.791	1.557	0.904
NM_001033285	Cdc42bpa	-0.421	0.811	0.352	0.111	-0.958	1.249	-0.001	0.001	0.552	0.696	1.103	0.537	0.394
NM_001033286	Slc30a10	2.212	2.799	-0.306	0.048	-0.08	0.013	-1.911	1.767	0.171	0.035	0.051	0.044	0.052
NM_001033288	Sbspon	1.594	3.06	-0.998	0.743	0.839	0.344	-1.15	1.655	0.683	0.211	0.182	0.303	0.558
NM_001033289	Slc9a2	0.982	0.878	2.145	1.581	0.548	0.247	-0.291	0.16	0.277	0.132	0.161	0.221	0.048
NM_001033290	Gpr55	1.417	0.428	-2.587	2.499	0.466	0.116	0.943	0.377	0.09	0.031	0.128	0.168	0.954
NM_001033291	Usp40	0.204	0.122	-0.144	0.022	-2.164	1.968	-1.523	1.243	0.348	0.285	0.552	0.117	0.122
NM_001033292	Espnl	-0.511	0.13	-0.594	NA	-0.572	NA	-2.285	0.544	0.028	0.037	0.008	0.005	0.008
NM_001033293	Uap1l1	-0.248	0.577	1.029	1.83	-0.859	1.509	2.121	10.859	4.35	4.842	35.261	18.484	8.534
NM_001033294	Ddx31	-0.071	0.075	-0.438	0.931	0.127	0.142	-0.033	0.032	4.006	3.987	3.703	3.841	4.872
NM_001033296	Sel1l2	NA	NA	NA	NA	NA	NA	NA	NA	0	0	0	0	0
NM_001033297	Smim26	0.146	0.179	-0.262	0.198	-0.135	0.08	0.172	0.18	9.872	8.373	12.497	10.875	12.264
NM_001033298	Kiz	0.316	2.201	0.507	0.922	0.337	0.662	0.236	0.477	13.965	10.531	13.443	16.189	10.63
NM_001033299	Zfp217	0.49	7.761	0.244	0.414	-0.012	0.016	0.93	17.302	11.512	7.688	22.812	21.5	17.03
NM_001033300	Gmps	0.105	0.645	-0.444	2.36	0.462	2.437	-0.187	0.895	30.234	26.445	20.005	26.046	33.177
NM_001033301	Fhdc1	-0.441	0.457	-1.724	3.508	0.122	0.064	0.347	0.275	0.298	0.382	0.361	0.373	1.143
NM_001033302	Ciart	-0.002	0.001	-0.422	0.3	-0.206	0.131	-0.788	0.935	1.909	1.795	1.317	1.081	1.357
NM_001033303	Ampd1	-0.965	NA	-0.1	NA	1.018	NA	2.322	NA	0.008	0.015	0.021	0.04	0.039
NM_001033304	5330417C22Rik	3.283	2.751	2.08	0.242	2.696	NA	-1.72	0.596	0.174	0.016	0.009	0.053	0.012
NM_001033305	Ndufb6	0.097	0.263	-0.085	0.048	-0.305	0.387	-0.389	0.856	57.774	50.713	56.133	43.2	42.995
NM_001033306	Shb	-0.333	1.164	0.382	0.478	-0.476	1.768	0.491	2.273	5.038	5.956	10.137	6.946	4.96
NM_001033308	Themis2	-0.318	0.181	1.627	0.445	0.068	0.013	-1.747	1.814	0.361	0.42	0.106	0.106	0.032
NM_001033310	Cox18	-0.783	0.792	0.306	0.178	0.194	0.121	0.829	0.88	1.703	2.79	2.765	2.965	2.248
NM_001033311	Vsig10	0.145	0.434	0.285	0.467	-0.18	0.364	0.748	5.643	4.221	3.593	8.291	6.949	5.355
NM_001033312	Fbxl18	0.411	1.913	-0.407	1.1	-0.01	0.01	0.592	3.44	4.541	3.207	7.109	6.722	8.33
NM_001033313	Pdap1	0.321	3.291	-0.431	0.903	0.589	2.419	0.01	0.013	93.423	70.326	64.438	92.641	116.238
NM_001033314	Ccdc61	0.244	0.77	-0.208	0.192	-0.136	0.142	-0.367	0.809	8.172	6.496	7.188	6.209	6.722
NM_001033315	Hipk4	0.129	0.089	0.186	0.083	-0.315	0.28	0.137	0.099	0.811	0.698	1.146	0.871	0.716
NM_001033316	Ffar3	0.976	NA	NA	NA	NA	NA	-0.816	NA	0.005	0	0	0	0
NM_001033317	Cnga4	0.047	NA	1.306	NA	1.206	NA	-0.437	NA	0.023	0.022	0.008	0.017	0.006
NM_001033318	Cog7	0.033	0.06	0.107	0.13	-0.155	0.327	0.301	1.267	8.218	7.521	11.614	9.944	8.606
NM_001033319	Ppfia1	0.018	0.056	0.019	0.012	0.121	0.189	0.452	1.992	15.327	14.239	19.935	20.623	18.986
NM_001033321	Tmem231	0.298	0.884	-0.005	0.002	-0.032	0.034	-0.795	5.969	9.804	7.451	5.975	5.537	5.205
NM_001033322	Gucy1a2	-1.308	7.65	-0.7	0.969	0.761	0.903	0.559	0.901	0.258	0.599	0.234	0.372	0.568
NM_001033324	Zbtb16	2.891	1.133	2.637	0.547	-1.388	0.565	0.364	0.083	0.046	0.006	0.163	0.057	0.009
NM_001033325	A630095E13Rik	NA	NA	-0.849	NA	-0.782	NA	NA	NA	0	0	0.017	0	0.012
NM_001033326	Dhrsx	NA	NA	NA	NA	NA	NA	NA	NA	0	0	0	0	0
NM_001033328	Tmem185a	-0.028	0.014	-0.03	0.005	-0.223	0.077	-0.419	0.222	1.211	1.168	1.084	0.893	0.84
NM_001033329	Arhgef9	-2.189	3.516	0.02	0.002	-0.552	0.133	-0.538	0.213	0.088	0.376	0.094	0.058	0.053
NM_001033330	Frmpd4	-1.338	0.226	0.074	NA	-1.611	NA	0.252	0.023	0.011	0.022	0.037	0.012	0.009
NM_001033331	Gas2l3	-0.908	4.624	-0.218	0.288	1.005	2.505	1.1	11.35	2.149	3.794	2.402	4.519	4.921
NM_001033332	Tmtc3	1.111	0.251	-0.741	0.085	1.101	NA	-1.414	0.358	0.116	0.049	0.023	0.04	0.065
NM_001033333	Myrfl	2.764	0.781	-1.639	NA	-2.484	NA	-4.535	1.596	0.084	0.012	0.02	0.003	0.01
NM_001033334	Syndig1l	0.976	NA	3.545	NA	-1.415	NA	3.576	0.699	0.004	0	0.136	0.048	0.004
NM_001033335	Serpina3f	NA	NA	NA	NA	NA	NA	NA	NA	0	0	0	0.001	0
NM_001033336	Abcc4	0.681	3.3	-1.329	1.916	1.021	2.273	1.149	6.82	2.213	1.294	2.509	4.802	11.403
NM_001033337	Ttc38	0.137	0.239	0.709	1.407	-0.776	2.397	-0.742	3.411	2.529	2.161	2.661	1.485	0.846
NM_001033338	Rimbp3	1.495	1.598	-1.015	0.272	0.161	0.026	-2.039	1.759	0.177	0.059	0.041	0.043	0.08
NM_001033339	Mmp25	-3.124	4.006	1.281	0.179	-1.428	0.61	0.999	0.257	0.03	0.262	0.172	0.06	0.025
NM_001033340	Lrrc30	4.739	1.114	2.08	NA	-0.359	NA	-1.667	0.347	0.079	0	0.034	0.025	0.006
NM_001033341	Zfp407	0.166	0.86	0.176	0.34	0.081	0.155	-0.047	0.102	5.766	4.832	5.456	5.482	4.534
NM_001033342	Cdc42bpg	0.315	2.058	-0.672	3.245	-0.362	0.944	0.247	0.935	4.179	3.159	6.572	4.866	7.269
NM_001033343	Sec31b	0.501	0.365	-0.387	0.079	-0.005	0.002	-0.44	0.311	0.304	0.202	0.232	0.221	0.273
NM_001033344	Dusp27	2.4	0.477	3.376	0.773	-3.599	9.127	0.909	0.309	0.037	0.008	0.847	0.068	0.007
NM_001033345	Catip	-0.54	0.195	0.959	0.491	-0.087	0.028	1.653	1.471	0.118	0.161	0.409	0.361	0.174
NM_001033346	Lrrc55	-1.692	0.909	-8.235	1.955	-1.291	NA	-3.4	0.708	0.02	0.062	0.005	0.002	0.516
NM_001033347	D430041D05Rik	-0.619	1.64	-0.235	0.074	-1.463	1.893	-0.47	0.592	0.336	0.485	0.704	0.237	0.264
NM_001033348	Ralgapa2	1.293	19.262	-0.128	0.078	0.172	0.403	-0.021	0.036	4.11	1.569	3.726	3.976	4.078
NM_001033349	Ankub1	NA	NA	1.066	NA	1.133	NA	2.065	NA	0	0	0.006	0.012	0.005
NM_001033350	Bank1	-0.805	0.387	NA	NA	NA	NA	-6.717	3.733	0.185	0.305	0	0	0
NM_001033351	Grin3a	-3.04	3.811	1.758	0.988	0.884	0.412	2.465	1.531	0.07	0.549	0.215	0.381	0.102
NM_001033352	Klhl21	0.206	0.882	-0.198	0.149	-0.768	2.669	-0.512	1.533	7.632	6.221	9.426	5.24	5.637
NM_001033354	Iqsec3	NA	NA	-0.711	NA	1.141	NA	1.107	NA	0	0	0.001	0.002	0.003
NM_001033355	Zfp568	0.074	0.143	-0.488	0.875	-0.075	0.066	-0.506	1.819	4.716	4.216	3.649	3.255	4.289
NM_001033356	Ntn5	-1.838	NA	-1.414	NA	-0.953	NA	0.918	NA	0.005	0.015	0.021	0.011	0.022
NM_001033359	Cntn5	-0.657	NA	-2.197	NA	1.141	NA	-1.921	NA	0.012	0.017	0	0.003	0.013
NM_001033360	Gpr101	NA	NA	NA	NA	NA	NA	NA	NA	0	0	0	0	0
NM_001033361	Pgr15l	0.976	NA	NA	NA	-0.782	NA	-0.816	NA	0.002	0	0.002	0	0
NM_001033362	Gm614	-3.061	NA	NA	NA	NA	NA	-0.816	NA	0.013	0.107	0	0	0
NM_001033364	Cdhr2	-2.117	0.945	0.285	NA	0.036	NA	0.307	0.05	0.02	0.085	0.025	0.025	0.019
NM_001033365	Mroh5	-1.803	NA	NA	NA	NA	NA	NA	NA	0	0.007	0	0	0
NM_001033366	Mucl3	-1.276	0.479	0.05	NA	2.67	NA	0.047	0.007	0.044	0.099	0.007	0.044	0.04
NM_001033367	Nlrc4	0.105	0.04	-0.813	NA	-0.82	NA	-4.293	3.131	0.161	0.14	0.015	0.008	0.013
NM_001033369	Acvr1c	-1.215	0.309	-2.005	0.224	0.264	NA	-0.527	0.054	0.009	0.02	0.007	0.007	0.024
NM_001033371	Lrrc36	-2.218	0.571	-1.143	NA	0.282	NA	-0.808	NA	0.018	0.075	0.005	0.009	0.018
NM_001033372	Gm648	-0.902	NA	-1.491	NA	1.061	NA	1.023	NA	0.007	0.018	0.01	0.019	0.052
NM_001033373	Cdk15	-2.293	NA	1.343	NA	3.417	NA	1.511	NA	0.015	0.058	0.006	0.034	0.018
NM_001033374	Srarp	NA	NA	NA	NA	NA	NA	NA	NA	0	0	0	0	0
NM_001033375	Washc4	-0.138	0.604	0.151	0.329	-0.044	0.048	0.327	1.808	12.655	13.107	17.008	15.578	13.105
NM_001033378	A430078G23Rik	0.147	0.101	0.078	0.025	-0.069	0.031	-0.01	0.005	0.652	0.551	0.7	0.638	0.562
NM_001033379	Dcp1b	0.406	1.45	0.488	0.604	0.005	0.003	-0.492	1.364	2.828	2.009	2.057	1.98	1.312
NM_001033380	Itpripl2	-1.424	66.157	0.485	1.945	-0.539	3.267	0.926	11.149	6.167	15.563	17.614	11.487	7.694
NM_001033382	Cacna2d4	0.976	NA	NA	NA	NA	NA	-0.816	NA	0.002	0	0	0.001	0.001
NM_001033383	Zfp865	-0.153	0.463	-0.423	0.318	-0.658	0.97	-0.858	2.009	6.362	6.657	5.719	3.429	4.326
NM_001033385	Tbc1d32	0.189	0.444	0.592	3.04	0.133	0.193	-0.014	0.018	2.969	2.438	2.781	2.886	1.789
NM_001033389	Fubp3	0.119	0.734	-0.5	0.396	-0.831	1.637	-0.51	0.916	15.204	13.168	19.606	10.424	13.856
NM_001033391	Ipcef1	0.976	NA	NA	NA	NA	NA	-0.816	NA	0.009	0	0	0	0.003
NM_001033393	Tmem104	-0.751	5.335	0.864	1.526	-0.407	0.962	0.549	1.691	1.709	2.704	3.418	2.461	1.253
NM_001033394	Tmem88b	1.275	1.896	0.038	0.009	0.167	0.066	-0.459	0.351	0.495	0.193	0.332	0.353	0.321
NM_001033397	Krt26	NA	NA	NA	NA	NA	NA	NA	NA	0	0	0	0	0
NM_001033399	Gfod1	-1.053	4.34	0.116	0.057	0.012	0.006	-0.179	0.169	0.434	0.848	0.395	0.376	0.324
NM_001033400	Nutm2	NA	NA	NA	NA	NA	NA	NA	NA	0	0	0	0	0
NM_001033404	Gm813	NA	NA	NA	NA	NA	NA	NA	NA	0	0	0	0	0
NM_001033405	Treml2	-2.683	4.221	NA	NA	NA	NA	-5.899	2.097	0.077	0.47	0	0	0
NM_001033407	Gm815	0.976	NA	NA	NA	NA	NA	-0.816	NA	0.019	0	0	0	0
NM_001033408	Rbm44	0.014	NA	-2.789	NA	-2.515	NA	0.145	NA	0.002	0.002	0.017	0.002	0.019
NM_001033409	Lgr6	2.034	7.973	-2.341	2.417	0.893	0.764	-0.287	0.249	1.217	0.277	0.552	0.973	4.682
NM_001033410	Rnf224	1.755	0.388	-0.719	0.109	-0.878	0.197	0.471	0.093	0.077	0.021	0.202	0.106	0.163
NM_001033411	Gm826	2.31	NA	NA	NA	-4.354	NA	-3.119	NA	0.046	0.008	0.11	0	0
NM_001033412	Gm829	NA	NA	1.074	NA	1.141	NA	1.107	NA	0	0	0	0.01	0
NM_001033415	Shisa3	-0.942	37.226	0.737	0.947	0.438	1.548	-0.329	2.517	88.555	159.753	54.015	69.171	38.994
NM_001033418	Bsph1	NA	NA	NA	NA	NA	NA	NA	NA	0	0	0	0	0
NM_001033419	Ceacam16	-2.441	NA	-2.7	NA	-1.653	NA	NA	NA	0	0.017	0.011	0	0.022
NM_001033420	Dock1	0.079	0.236	0.572	3.071	0.061	0.108	-0.372	1.88	34.839	30.945	26.669	26.443	16.592
NM_001033421	Pate2	-0.074	0.014	0.038	0.006	0.16	0.036	0.758	0.245	0.096	0.095	0.151	0.162	0.147
NM_001033422	Thoc2	0.282	1.16	0.192	0.205	0.366	0.637	0.477	1.6	23.506	18.129	26.386	32.087	26.245
NM_001033423	Gm773	NA	NA	NA	NA	NA	NA	NA	NA	0	0	0	0	0
NM_001033424	Fnd3c2	NA	NA	-0.767	NA	1.133	NA	2.065	NA	0	0	0.002	0.006	0.009
NM_001033425	Zscan10	-2.8	NA	NA	NA	NA	NA	NA	NA	0	0.012	0	0	0
NM_001033426	Grxcr2	NA	NA	NA	NA	NA	NA	NA	NA	0	0	0	0	0
NM_001033427	Lyg2	-0.948	NA	NA	NA	NA	NA	NA	NA	0	0.004	0	0	0
NM_001033428	Tmem211	-0.687	0.125	-0.278	0.034	1.761	NA	1.142	0.273	0.039	0.058	0.025	0.083	0.096
NM_001033429	Trim75	-2.41	NA	-0.836	NA	-2.308	NA	1.107	NA	0	0.011	0.023	0.004	0.008
NM_001033430	Kdm7a	0.736	3.827	-0.386	1.588	-0.267	0.384	0.218	0.388	11.743	6.592	17.084	13.373	16.302
NM_001033431	Nlrp12	0.976	NA	NA	NA	NA	NA	-0.816	NA	0.002	0	0	0	0
NM_001033432	Heca	-0.215	1.307	-0.153	0.16	-0.215	0.435	-0.25	1.006	8.352	9.117	8.463	6.882	7.18
NM_001033433	Tmem102	-0.058	0.027	-1.777	2.277	0.05	0.018	0.311	0.194	0.458	0.449	0.565	0.561	1.804
NM_001033434	Gm884	2.326	NA	NA	NA	NA	NA	-3.133	NA	0.011	0.002	0	0	0
NM_001033435	Milr1	-0.39	0.207	-2.668	NA	NA	NA	-6.709	4.127	0.389	0.476	0.001	0.002	0.024
NM_001033436	Atxn7l1	-1.088	4.987	0.729	0.86	0.444	0.466	0.904	1.726	1.167	2.343	1.662	2.157	1.207
NM_001033437	Lsmem1	-0.831	NA	0.3	NA	0.173	NA	-0.37	NA	0.022	0.038	0.016	0.017	0.012
NM_001033438	Gm906	NA	NA	NA	NA	NA	NA	NA	NA	0	0	0	0.001	0
NM_001033439	Lrch1	-0.583	4.361	0.558	1.63	-0.379	0.978	0.086	0.138	3.412	4.825	4.877	3.553	2.255
NM_001033440	Gm1587	NA	NA	NA	NA	NA	NA	NA	NA	0	0	0	0	0
NM_001033441	Alg10b	0.015	0.027	0.091	0.083	0.234	0.413	-0.059	0.132	31.255	28.996	26.522	29.408	25.881
NM_001033442.1	Gm1604b	0.595	0.118	1.929	NA	-0.699	NA	-1.806	0.39	0.181	0.11	0.087	0.056	0.012
NM_001033442	Gm1604b	NA	NA	NA	NA	NA	NA	NA	NA	0	0	0	0.007	0
NM_001033443	Cdkl4	-0.427	0.094	-1.354	NA	-0.813	NA	-1.492	0.339	0.042	0.05	0.023	0.016	0.034
NM_001033444	Capn13	-0.948	NA	NA	NA	NA	NA	NA	NA	0	0.004	0	0	0
NM_001033445	Garem1	0.161	0.823	1.013	6.545	-0.346	0.958	1.301	18.242	9.171	7.705	29.669	22.216	10.29
NM_001033446	Arl14epl	0.503	0.065	0.138	NA	-0.418	NA	-0.322	0.048	0.035	0.023	0.039	0.028	0.023
NM_001033447	Gm960	0.182	0.061	-0.301	0.046	-0.124	0.024	-0.607	0.227	0.184	0.152	0.137	0.119	0.137
NM_001033448	Ap5b1	3.094	2.612	-2.584	2.252	-0.027	0.005	-1.673	1.043	0.899	0.098	0.296	0.276	1.565
NM_001033449	Tmem237	-0.075	0.07	-0.185	0.139	0.165	0.12	0.193	0.231	3.865	3.791	4.042	4.353	4.605
NM_001033450	Ifi211	-1.612	0.467	-0.295	0.105	0.345	0.169	3.22	2.789	0.07	0.207	0.556	0.674	0.775
NM_001033451	Zfp408	0.131	0.155	-0.142	0.145	0.281	0.5	0.618	1.953	4.444	3.841	5.803	6.697	6.88
NM_001033452	Accsl	NA	NA	NA	NA	-0.782	NA	NA	NA	0	0	0.003	0	0
NM_001033453	Pdp1	-1.455	1.682	-0.113	0.034	-0.866	0.984	-0.17	0.06	0.892	2.291	1.493	0.78	0.776
NM_001033455	Ccdc27	2.505	1.187	1.074	NA	-2.296	NA	-5.386	2.715	0.227	0.036	0.028	0.004	0
NM_001033457	Nom1	0.388	3.431	-0.392	2.18	0.302	1.519	-0.076	0.198	13.315	9.59	10.612	12.413	15.231
NM_001033458	Gm1673	0.52	0.488	-0.074	0.019	-0.145	0.07	-0.07	0.039	2.985	1.956	3.23	2.786	2.754
NM_001033460	Drc1	-0.569	0.16	1.329	0.285	-1.938	1.619	0.457	0.12	0.07	0.098	0.382	0.094	0.035
NM_001033461	Lrrc43	NA	NA	NA	NA	NA	NA	NA	NA	0	0	0.001	0.002	0
NM_001033463	Tatdn2	0.08	0.034	0.584	0.144	-0.686	0.353	-0.737	0.44	0.423	0.377	0.422	0.246	0.154
NM_001033464	Cracr2a	-1.11	1.4	0.81	0.189	-0.72	0.459	-0.095	0.037	0.626	1.276	0.993	0.575	0.298
NM_001033465	6430531B16Rik	3.965	NA	-1.539	NA	-0.782	NA	-3.803	NA	0.07	0.001	0.012	0.001	0.012
NM_001033466	Zbtb2	-0.501	1.525	-0.454	0.28	-0.122	0.081	-0.196	0.188	3.42	4.572	3.35	2.936	3.745
NM_001033468	Adgrg5	-1.969	0.274	1.074	NA	-0.751	NA	-1.452	NA	0.009	0.039	0.004	0.002	0
NM_001033469	Foxr1	-0.481	0.063	-0.526	0.072	0.235	NA	0.808	0.125	0.044	0.058	0.066	0.075	0.105
NM_001033471	Cpxcr1	NA	NA	NA	NA	NA	NA	NA	NA	0	0	0	0	0
NM_001033472	Bclaf3	-0.041	0.038	-0.345	0.435	0.625	1.246	0.033	0.025	4.911	4.743	3.376	4.92	5.837
NM_001033473	Odf3l2	1.876	NA	-0.849	NA	-0.782	NA	-1.72	NA	0.015	0	0.008	0	0.008
NM_001033474	Atxn7l3b	-0.182	1.756	0	0	-0.28	0.906	-0.396	2.471	90.579	96.521	86.516	67.483	63.157
NM_001033475	Tmed8	-0.556	2.72	0.5	1.426	-0.28	0.535	0.375	1.054	3.412	4.703	5.553	4.344	2.86
NM_001033477	Gm1322	NA	NA	NA	NA	NA	NA	NA	NA	0	0	0	0	0
NM_001033478	Fam47e	NA	NA	NA	NA	NA	NA	NA	NA	0	0	0	0	0
NM_001033479	Gm1527	NA	NA	NA	NA	NA	NA	NA	NA	0	0	0	0	0
NM_001033481	Myrf	1.885	35.285	1.615	8.3	-0.744	3.347	-1.284	12.698	5.686	1.449	4.041	2.299	0.702
NM_001033484	Iqgap3	-0.512	6.864	-0.133	0.122	1.225	8.89	0.342	1.328	7.596	10.198	4.276	9.444	9.704
NM_001033485	BC048644	2.183	NA	-0.711	NA	0.18	NA	-1.06	NA	0.01	0	0.004	0.005	0.007
NM_001033488	Mfsd2b	-0.536	0.256	-0.375	0.111	-0.053	0.014	0.159	0.059	0.144	0.199	0.174	0.158	0.191
NM_001033489	Rnf207	3.247	3.401	0.524	0.199	-0.996	1.332	-0.062	0.029	0.465	0.045	0.916	0.439	0.286
NM_001033490	Pusl1	0.079	0.103	-0.01	0.004	0.109	0.079	-0.717	2.543	5.94	5.317	3.437	3.544	3.333
NM_001033492	Mageb4	NA	NA	NA	NA	NA	NA	NA	NA	0	0	0	0	0
NM_001033493	Adgrf2	0.382	0.075	0.379	0.079	-0.853	0.41	1.397	0.654	0.045	0.032	0.219	0.115	0.083
NM_001033496	Zfp213	-0.155	0.314	-0.102	0.051	-0.409	0.765	-0.562	1.978	4.354	4.565	4.026	2.896	2.889
NM_001033498	Gramd2	0.762	0.196	0.199	0.027	-1.561	0.766	0.26	0.066	0.045	0.025	0.163	0.057	0.046
NM_001033499	Sh2d1b2	NA	NA	NA	NA	NA	NA	NA	NA	0	0	0	0	0.005
NM_001033500	Wdr72	-2.355	0.755	2.595	NA	0.452	NA	0.323	NA	0.01	0.048	0.009	0.012	0.001
NM_001033525	Kcnk6	-1.72	6.631	0.602	0.246	-0.773	0.673	-1.443	2.193	0.543	1.687	0.356	0.196	0.122
NM_001033528	Usp36	0.241	1.074	-0.575	4.044	0.342	1.457	0.047	0.095	8.677	6.923	7.294	8.811	12.268
NM_001033530	AW146154	0.579	1.998	-0.455	0.487	0.35	0.32	-0.421	0.723	2.391	1.507	1.453	1.76	2.248
NM_001033531	Klhl32	2.322	0.815	0.731	0.115	0.75	0.269	0.006	0.001	0.075	0.015	0.047	0.075	0.042
NM_001033532	AW554918	0.198	0.734	0.231	0.333	0.355	0.761	-0.239	0.664	5.298	4.361	3.646	4.417	3.514
NM_001033533	Ccdc102a	-1.449	21.672	0.353	0.259	-0.642	3.503	-0.105	0.17	6.716	17.311	10.049	6.138	4.457
NM_001033534	Layn	-2.036	7.938	0.16	0.102	0.134	0.137	2.78	14.45	0.62	2.375	3.969	4.147	3.468
NM_001033535	Tnfaip8l3	-0.546	0.138	0.082	0.008	-0.498	NA	0.224	0.04	0.061	0.084	0.104	0.07	0.062
NM_001033536	Rfx7	0.597	8.562	-0.008	0.004	0.385	0.829	1.044	8.182	16.005	9.938	26.202	32.396	30.449
NM_001033537	Pgap3	0.562	3.455	-0.152	0.118	-0.723	2.921	-0.731	3.942	6.616	4.204	6.774	3.906	4.052
NM_001033539	Bex6	NA	NA	NA	NA	NA	NA	NA	NA	0	0	0	0	0
NM_001033540	Gm5113	0.117	0.032	1.362	0.295	3.714	2.181	-0.541	0.22	0.419	0.372	0.024	0.278	0.096
NM_001033541	Gm5127	-3.075	4.427	-2.374	NA	0.553	NA	-2.263	0.612	0.11	0.885	0.017	0.022	0.111
NM_001033542	Slc47a2	-1.087	NA	1.074	NA	-2.003	NA	-1.603	NA	0.014	0.029	0.019	0.004	0
NM_001033543	Il20rb	-0.516	0.322	-0.272	0.135	0.102	0.043	1.224	1.555	0.266	0.359	0.596	0.614	0.692
NM_001033547	Ccdc185	-1.456	NA	NA	NA	NA	NA	-0.816	NA	0.004	0.012	0	0	0
NM_001033548	Dnaaf3	0.187	0.271	0.289	0.329	-0.97	4.257	-0.079	0.096	3.374	2.768	6.45	3.142	2.402
NM_001033550	Lrrc8b	0.961	10.525	-0.109	0.093	0.003	0.002	0.683	5.778	7.249	3.499	12.085	11.412	11.539
NM_001033573	Zdhhc6	0.096	0.189	-0.289	0.698	0.354	1.747	0.226	0.914	15.415	13.655	14.573	17.7	20.252
NM_001033597	Acsl6	-0.085	0.008	-1.444	0.191	-1.14	NA	-1.224	0.169	0.086	0.085	0.081	0.034	0.093
NM_001033598	Acsl6	0.385	0.052	-0.476	0.049	0.245	NA	-1.267	0.292	0.162	0.119	0.06	0.067	0.089
NM_001033599	Acsl6	NA	NA	-0.849	NA	NA	NA	NA	NA	0	0.001	0.003	0.001	0.004
NM_001033600	Acsl4	0.228	0.255	0.015	0.008	-0.649	1.501	1.869	20.662	1.207	0.965	7.208	4.319	4.017
NM_001033606	Acsl3	1.203	44.037	-0.556	1.974	0.448	1.903	1.383	26.146	20.293	8.27	40.198	52.016	71.355
NM_001033621	Myot	4.409	NA	NA	NA	NA	NA	-4.251	NA	0.05	0	0	0	0
NM_001033630	2310061I04Rik	0.384	1.384	-0.067	0.033	0.584	1.482	1.174	6.238	8.364	6.032	12.976	18.589	18.184
NM_001033632	Ifitm6	-0.184	0.03	-1.906	NA	-0.782	NA	-4.647	0.96	0.271	0.282	0.018	0	0.038
NM_001033633	Slc2a13	-2.513	80.663	0.356	0.088	-0.334	0.16	-3.619	48.406	2.065	11.051	0.22	0.164	0.118
NM_001033634	Zyg11b	-0.042	0.158	-0.177	0.235	0.023	0.034	0.388	3.692	11.534	11.164	15.393	14.809	15.679
NM_001033636	Prex2	-1.554	1.919	-0.321	0.058	1.12	0.337	0.622	0.215	0.06	0.169	0.044	0.092	0.108
NM_001033638	Crxos	NA	NA	1.074	NA	1.141	NA	1.107	NA	0	0.002	0	0.012	0
NM_001033654	Pus10	0.291	0.257	-1.068	2.46	-0.039	0.021	0.433	0.49	1.344	1.029	1.949	1.776	3.497
NM_001033668	Dnah1	0.181	0.457	0.443	0.679	-0.572	1.815	-0.859	4.886	1.076	0.89	0.912	0.583	0.399
NM_001033669	Fbxw10	-0.862	0.254	-2.204	NA	0.177	NA	-1.498	0.342	0.038	0.064	0.013	0.012	0.055
NM_001033711	Evi2a	0.116	0.041	0.67	0.374	-0.107	0.041	0.764	0.615	0.43	0.369	0.825	0.72	0.423
NM_001033713	Mef2a	-0.441	1.516	0.108	0.056	-0.245	0.162	0.448	1.487	1.325	1.69	2.25	1.776	1.549
NM_001033759	Tmem2	0.29	1.011	-0.059	0.044	-0.271	0.938	-0.099	0.177	11.078	8.482	12.9	10.143	9.837
NM_001033764	4931408C20Rik	0.014	NA	-6.598	3.238	1.141	NA	0.145	NA	0.002	0.002	0	0.003	0.228
NM_001033765	1700071K01Rik	NA	NA	1.074	NA	1.141	NA	1.107	NA	0	0	0	0.01	0
NM_001033766	4930596D02Rik	NA	NA	NA	NA	NA	NA	NA	NA	0	0	0	0	0
NM_001033767	Gm4951	-0.341	0.052	-1.718	NA	2.095	NA	-1.904	NA	0.031	0.037	0	0.008	0.025
NM_001033768	Pin1rt1	0.976	NA	-2.299	NA	-2.192	NA	-0.816	NA	0.011	0	0.024	0	0.024
NM_001033769	B020031M17Rik	NA	NA	NA	NA	NA	NA	NA	NA	0	0	0	0	0
NM_001033770	Gm904	NA	NA	-1.798	NA	-0.782	NA	NA	NA	0	0	0.015	0	0.029
NM_001033773	Ube2u	0.358	0.057	1.816	NA	0.281	NA	-0.067	0.01	0.071	0.051	0.059	0.066	0.018
NM_001033775	Trim80	0.014	NA	-1.539	NA	-1.67	NA	-0.816	NA	0.004	0.005	0.01	0	0.008
NM_001033776	Vrtn	NA	NA	NA	NA	NA	NA	NA	NA	0	0	0	0	0
NM_001033779	Gm5544	-0.47	NA	0.901	NA	1.023	NA	1.433	0.248	0.045	0.06	0.063	0.121	0.063
NM_001033780	I830077J02Rik	-0.192	0.052	0.325	NA	0.388	NA	-2.292	0.712	0.232	0.249	0.039	0.045	0.035
NM_001033782	Gm5592	1.852	NA	0.631	NA	-0.208	NA	-1.065	NA	0.023	0.006	0.014	0.011	0.006
NM_001033783	Gm5615	-0.948	NA	0.727	NA	1.195	NA	3.017	NA	0	0.003	0.008	0.018	0.009
NM_001033785	Akap14	0.042	NA	0.007	0.001	0.692	0.196	3.157	1.052	0.021	0.019	0.129	0.198	0.184
NM_001033786	Smim9	1.622	NA	2.993	NA	1.206	NA	1.389	NA	0.022	0	0.027	0.06	0
NM_001033789	Gm5820	-0.78	0.834	1.458	1.703	-0.056	0.024	1.174	1.69	0.388	0.629	0.948	0.864	0.29
NM_001033790	B020004J07Rik	-0.948	NA	-1.906	NA	NA	NA	NA	NA	0	0.004	0	0	0.01
NM_001033791	Gm12888	0.976	NA	NA	NA	NA	NA	-0.816	NA	0.007	0	0	0	0
NM_001033793	Ubtfl1	NA	NA	NA	NA	NA	NA	NA	NA	0	0	0	0	0
NM_001033794	Fbxw18	NA	NA	NA	NA	NA	NA	NA	NA	0	0	0	0	0
NM_001033795	Rtl4	1.04	0.44	2.95	0.947	-0.788	0.274	-0.4	0.122	0.112	0.05	0.15	0.083	0.01
NM_001033799	Cldn34b4	NA	NA	NA	NA	NA	NA	NA	NA	0	0	0	0	0.002
NM_001033805	Tmem253	1.599	1.755	-0.509	0.209	0.405	0.171	-0.369	0.19	0.997	0.307	0.591	0.756	1.003
NM_001033807	4930567H17Rik	NA	NA	NA	NA	NA	NA	NA	NA	0	0	0	0	0
NM_001033813	Zfp872	0.215	0.037	0.137	NA	-0.016	NA	0.211	0.04	0.041	0.033	0.049	0.046	0.039
NM_001033814	4930432M17Rik	NA	NA	NA	NA	NA	NA	NA	NA	0	0	0	0	0
NM_001033819	9130409I23Rik	-1.803	NA	1.066	NA	0.303	NA	2.065	NA	0	0.009	0.009	0.012	0.005
NM_001033820	Zfp551	0.465	0.819	0.238	0.159	-0.484	0.659	-0.72	1.899	2.069	1.421	1.819	1.233	0.977
NM_001033851	Cpne8	0.483	0.724	0.03	0.01	0.303	0.224	0.207	0.19	4.921	3.324	4.756	5.585	5.087
NM_001033865	Rps27a	0.057	0.117	-0.454	1.017	0.551	1.581	-0.341	1.203	30.822	27.837	17.084	23.888	30.531
NM_001033872	Smagp	-0.196	0.143	-0.234	0.035	-0.736	0.238	-2.477	3.651	2.102	2.241	0.64	0.356	0.415
NM_001033874	Ak8	0.516	0.174	-0.938	0.437	-0.261	0.072	-0.344	0.119	0.283	0.188	0.275	0.219	0.39
NM_001033875	Ctrc	-0.948	NA	NA	NA	NA	NA	NA	NA	0	0.01	0	0	0
NM_001033876	Kcnk9	0.976	NA	-1.152	NA	1.141	NA	0.145	NA	0.001	0	0	0.001	0.003
NM_001033877	Adamts17	1.006	3.958	0.898	0.497	0.521	0.251	-5.692	124.58	7.692	3.57	0.107	0.148	0.074
NM_001033878	Vmn2r66	NA	NA	NA	NA	NA	NA	NA	NA	0	0	0	0	0
NM_001033879	Tubal3	NA	NA	-1.338	NA	-0.648	NA	1.107	NA	0	0	0.006	0.004	0.008
NM_001033880	4930415L06Rik	NA	NA	NA	NA	NA	NA	NA	NA	0	0	0	0	0
NM_001033904	Khdc1c	-0.235	NA	-0.849	NA	NA	NA	-1.46	NA	0.018	0.021	0	0	0.014
NM_001033908	Med22	0.815	0.865	-0.191	0.115	0.321	0.182	0.092	0.049	2.768	1.481	2.403	2.91	3.093
NM_001033922	Treml4	0.577	NA	1.074	NA	1.141	NA	-1.355	NA	0.018	0.011	0.002	0.004	0.001
NM_001033929	Thnsl2	0.07	0.075	0.307	0.076	-0.5	0.33	-1.279	2.257	2.91	2.607	1.743	1.17	0.882
NM_001033954	Calca	-0.961	NA	-0.534	NA	0.569	NA	0.053	NA	0.034	0.065	0.021	0.037	0.057
NM_001033960	Rabgap1	1.363	2.326	0.668	0.367	0.294	0.138	-0.251	0.197	0.44	0.161	0.315	0.361	0.215
NM_001033962	Ube3a	0.04	0.06	0.207	0.296	0.319	0.516	0.586	2.176	16.43	14.946	20.528	24.139	19.552
NM_001033966	Ak2	0.671	1.173	0.18	0.045	-0.266	0.107	-2.024	5.907	2.995	1.779	0.906	0.736	0.594
NM_001033977	9230019H11Rik	NA	NA	1.528	NA	0.712	NA	2.519	NA	0	0	0.007	0.01	0.003
NM_001033978	H2-Eb2	2.43	0.684	-4.492	NA	-0.782	NA	-4.706	1.078	0.045	0.008	0.003	0	0.035
NM_001033979	Ldlrad2	2.183	NA	0.262	NA	0.243	NA	-0.083	NA	0.013	0	0.011	0.012	0.009
NM_001033980	Fam92b	0.939	NA	-0.711	NA	-2.064	NA	-0.778	NA	0.016	0.008	0.042	0.009	0.014
NM_001033981	Hbq1b	-3.603	2.452	5.004	1.487	-2.092	1.877	2.902	1.11	0.059	0.684	1.946	0.442	0.01
NM_001033983	7420426K07Rik	NA	NA	NA	NA	NA	NA	NA	NA	0	0	0	0	0
NM_001033988	Ncoa4	0.426	6.394	0.744	4.412	-0.14	0.337	0.043	0.101	30.069	21.046	35.369	30.384	17.004
NM_001034013	Asic2	NA	NA	5.047	NA	0.082	NA	5.082	0.793	0.001	0	0.064	0.067	0
NM_001034029	Il17re	-3.48	NA	1.074	NA	1.141	NA	1.107	NA	0	0.02	0.002	0.005	0.001
NM_001034030	Limk2	4.073	4.784	-0.844	0.098	-1.314	0.632	-2.021	1.682	0.371	0.021	0.232	0.087	0.147
NM_001034031	Il17re	-2.824	NA	NA	NA	NA	NA	NA	NA	0	0.014	0	0.001	0
NM_001034037	1700024G13Rik	1.622	NA	NA	NA	NA	NA	-1.46	NA	0.039	0	0	0	0
NM_001034059	Ccdc160	-1.277	1.012	0.644	0.141	0.486	0.143	0.275	0.092	0.211	0.485	0.19	0.251	0.152
NM_001034060	Rufy4	2.071	0.421	4.448	NA	-0.54	0.071	0.216	0.034	0.086	0.02	0.144	0.1	0.003
NM_001034085	Ppp2r1b	-0.358	0.641	-0.966	1.142	-0.504	0.518	-0.185	0.154	1.617	1.942	2.096	1.386	2.55
NM_001034097	Tnfsfm13	-1.19	1.677	0.123	0.014	-1.46	1.283	-0.545	0.247	0.607	1.299	1.187	0.404	0.354
NM_001034100	H2al1n	0.976	NA	NA	NA	NA	NA	-0.816	NA	0.023	0	0	0	0
NM_001034101	Gm13119	NA	NA	NA	NA	NA	NA	NA	NA	0	0	0	0	0
NM_001034102	Gm5800	-0.948	NA	NA	NA	NA	NA	NA	NA	0	0.01	0	0	0
NM_001034103	Gm5941	2.142	NA	NA	NA	-0.782	NA	-1.98	NA	0.041	0	0.018	0	0
NM_001034115	Shank1	0.274	0.662	-0.21	0.134	0.02	0.013	0.219	0.284	1.557	1.211	1.839	1.784	1.927
NM_001034168	Ank2	NA	NA	1.074	NA	0.18	NA	1.107	NA	0	0	0.002	0.003	0
NM_001034851	Retreg1	-0.009	0.007	-1.387	1.607	-0.574	0.427	-0.487	0.42	1.885	1.77	2.081	1.307	3.248
NM_001034856	Btg1-ps2	0.976	NA	-0.849	NA	NA	NA	-0.816	NA	0.006	0	0	0	0.006
NM_001034858	Armc2	-0.321	0.148	0.967	0.159	0.402	NA	-1.234	0.588	0.108	0.128	0.037	0.046	0.021
NM_001034859	Gm4841	-0.078	0.022	0.7	0.13	0.306	0.063	-0.36	0.107	0.127	0.125	0.084	0.098	0.053
NM_001034860	Gm4858	NA	NA	NA	NA	NA	NA	NA	NA	0	0	0	0	0
NM_001034862	Erich1	0.429	1.213	-0.177	0.192	0.353	0.713	0.736	3.226	4.331	3.033	5.817	7.09	7.471
NM_001034863	Tmem136	0.602	2.617	0.997	4.327	-0.339	1.119	0.775	3.74	4.145	2.571	9.271	6.945	3.27
NM_001034864	Gm4907	NA	NA	NA	NA	NA	NA	NA	NA	0	0	0	0	0
NM_001034866	Pnldc1	-0.916	0.546	0.327	0.091	0.45	0.186	0.844	0.471	0.218	0.385	0.293	0.381	0.283
NM_001034867	Pm20d2	2.669	9.881	0.007	0.001	0.29	0.098	-2.408	8.187	0.529	0.079	0.084	0.098	0.09
NM_001034868	Mrgprx2	0.976	NA	NA	NA	NA	NA	-0.816	NA	0.002	0	0	0	0
NM_001034869	Gm4981	-0.948	NA	NA	NA	NA	NA	NA	NA	0	0.005	0	0	0
NM_001034871	Clpsl2	NA	NA	NA	NA	NA	NA	NA	NA	0	0	0	0	0
NM_001034872	Gm853	NA	NA	NA	NA	-0.782	NA	NA	NA	0	0	0.005	0	0
NM_001034874	Shisa6	1.973	3.862	-0.914	0.687	0.683	0.445	2.244	7.547	0.207	0.049	0.638	0.964	1.708
NM_001034875	Bpifb4	0.976	NA	2.019	NA	2.086	NA	2.054	NA	0.004	0	0.004	0.02	0.003
NM_001034876	Ccdc24	0.097	0.072	-0.382	0.423	0.178	0.139	0.269	0.293	1.983	1.737	2.18	2.341	2.855
NM_001034878	Dnaic2	-2.472	2.513	1.573	NA	-0.393	NA	-0.798	0.176	0.052	0.266	0.041	0.029	0.009
NM_001034880	Gm5460	-2.471	NA	-0.653	NA	0.547	NA	2.002	NA	0.004	0.027	0.015	0.021	0.032
NM_001034881	Gm5464	0.979	0.222	0.028	0.003	0.275	NA	0.197	0.039	0.081	0.037	0.076	0.082	0.081
NM_001034882	Kbtbd6	-0.019	0.017	-0.02	0.009	1.254	3.922	0.038	0.036	1.647	1.557	0.737	1.653	1.581
NM_001034885	Pnpla1	-0.199	0.14	0.499	0.232	0.702	0.602	0.521	0.423	0.4	0.431	0.365	0.565	0.372
NM_001034891	Ermard	0.645	0.804	-0.232	0.156	-0.108	0.067	0.414	0.415	2.158	1.292	3.201	2.824	3.091
NM_001034893	Zfp936	-0.449	0.115	-0.695	NA	-0.682	NA	-1.29	0.247	0.06	0.08	0.041	0.025	0.036
NM_001034894	Foxr2	2.416	0.548	-1.483	NA	-0.422	NA	-1.865	0.46	0.047	0.009	0.018	0.013	0.034
NM_001034895	Zfr2	0.718	1.693	0.785	1.062	-0.727	2.432	-0.896	2.296	2.329	1.33	2.138	1.227	0.672
NM_001034896	Tmem92	0.041	NA	NA	NA	-1.712	NA	-1.72	NA	0.008	0.007	0.009	0	0
NM_001034898	Ms4a15	-2.429	NA	-0.769	NA	0.18	NA	1.107	NA	0	0.016	0.006	0.006	0.01
NM_001034899	Catspere2	0.014	NA	-0.193	NA	-0.227	NA	1.671	NA	0.007	0.006	0.029	0.02	0.018
NM_001034900	Zfp345	-0.674	0.216	-0.775	0.179	0.827	0.21	0.772	0.234	0.067	0.101	0.069	0.114	0.184
NM_001034902	Gm5878	0.197	NA	-0.711	NA	0.18	NA	-1.891	NA	0.009	0.007	0.002	0.002	0.004
NM_001034903	Mansc4	-1.118	0.406	-0.923	0.154	-0.16	NA	-0.831	0.216	0.186	0.387	0.122	0.103	0.179
NM_001034904.1	Gm5891	0.014	NA	-0.849	NA	-0.782	NA	-0.816	NA	0.005	0.005	0.006	0.003	0.007
NM_001034904	Gm5891	0.014	NA	-0.849	NA	-0.782	NA	-0.816	NA	0.005	0.005	0.006	0.003	0.007
NM_001034905	Spag11b	NA	NA	NA	NA	NA	NA	NA	NA	0	0	0	0	0
NM_001034906	Trim43a	1.095	0.275	1.584	0.379	-0.444	0.104	1.074	0.432	0.084	0.035	0.247	0.17	0.056
NM_001034907	Zc3h12b	-0.135	0.144	0.625	0.859	-0.137	0.12	-0.091	0.09	1.244	1.279	1.328	1.149	0.694
NM_001034909	Gm6034	-0.429	NA	-1.639	NA	-3.299	NA	-1.355	NA	0.018	0.023	0.071	0.006	0.019
NM_001034910	Defb42	1.876	NA	NA	NA	NA	NA	-1.72	NA	0.031	0	0	0	0
NM_001034962	Sorbs1	-0.471	0.066	-0.738	0.132	3.365	NA	0.219	0.034	0.049	0.062	0.006	0.055	0.085
NM_001034963	Sorbs1	0.052	0.015	-0.578	0.188	0.251	0.064	-0.373	0.147	0.133	0.121	0.087	0.102	0.144
NM_001034964	Sorbs1	-0.978	5.201	0.112	0.05	-0.681	1.083	-0.815	1.801	1.089	2.018	1.033	0.608	0.524
NM_001035122	Golm1	-0.519	4.854	0.473	1.644	-0.066	0.129	0.037	0.088	22.71	30.499	25.228	22.88	15.374
NM_001035123	Setd6	0.529	1.457	-0.426	0.809	0.493	1.12	-0.303	0.621	5.144	3.366	3.067	4.096	5.158
NM_001035226	Xpo1	-0.83	22.186	0.504	0.552	0.201	0.162	0.027	0.06	20.11	33.63	18.73	20.134	13.343
NM_001035228	St3gal5	0.513	2.693	0.328	0.547	-0.089	0.118	0.409	1.618	11.085	7.266	16.241	14.428	10.79
NM_001035231	Zfp748	0.249	0.666	-0.053	0.065	0.517	2.365	-0.064	0.105	6.219	4.938	4.319	5.842	5.672
NM_001035239	Trpm3	1.085	NA	2.2	NA	1.281	NA	0.179	0.022	0.007	0.003	0.004	0.007	0.002
NM_001035240	Trpm3	-0.735	0.127	3.908	NA	-1.506	NA	-0.661	0.091	0.01	0.016	0.02	0.006	0
NM_001035241	Trpm3	0.048	NA	NA	NA	-4.167	NA	-2.703	NA	0.003	0.002	0.009	0.001	0
NM_001035242	Trpm3	-0.879	0.205	4.391	NA	-0.876	NA	0.141	0.022	0.008	0.014	0.018	0.008	0.001
NM_001035243	Trpm3	0.237	NA	1.074	NA	-3.65	NA	-1.018	NA	0.002	0.002	0.012	0.001	0
NM_001035244	Trpm3	-1.091	1.356	1.196	0.359	-0.739	0.376	-0.785	0.5	0.22	0.433	0.214	0.126	0.055
NM_001035245	Trpm3	-1.47	NA	-1.189	NA	-1.797	NA	0.821	NA	0.009	0.024	0.061	0.014	0.032
NM_001035246	Trpm3	NA	NA	NA	NA	NA	NA	NA	NA	0	0	0	0	0
NM_001035509	Zcchc18	0.87	1.476	-1.18	3.18	0.464	0.567	0.091	0.054	1.722	0.886	1.367	1.793	3.818
NM_001035510	Zcchc18	2.06	5.339	-0.689	0.741	0.469	0.426	-1.002	2.848	1.32	0.291	0.494	0.643	0.975
NM_001035525	AU040320	0.949	0.681	0.885	0.58	-0.246	0.119	0.075	0.032	0.52	0.254	0.672	0.54	0.269
NM_001035526	AU040320	-1.808	0.521	-0.299	0.062	0.075	0.02	3.375	2.849	0.017	0.053	0.168	0.171	0.202
NM_001035532	Akap2	-1.261	13.258	0.26	0.203	0.042	0.057	1.438	21.247	3.686	8.355	10.074	9.821	7.693
NM_001035533	Akap2	-1.337	6.343	0.713	0.618	0.56	0.893	2.211	13.09	0.408	0.966	1.333	1.856	1.062
NM_001035854	Ap2b1	-0.557	6.521	-0.092	0.062	-0.179	0.301	-0.436	1.667	11.187	15.429	9.694	8.106	8.087
NM_001036293	Nrbf2	-0.38	1.691	-0.36	1.119	-0.074	0.111	0.31	1.075	8.032	9.868	10.839	9.767	11.736
NM_001036684	Atp2b2	1.867	0.349	3.968	NA	1.578	NA	-0.283	0.049	0.011	0.003	0.004	0.008	0
NM_001036740	B3gnt8	-2.778	2.142	1.969	0.277	-0.557	0.134	0.763	0.16	0.145	0.917	0.362	0.244	0.058
NM_001037098	Nacc2	0.77	0.667	1.514	4.396	-0.427	0.56	1.692	4.546	0.217	0.118	0.974	0.687	0.227
NM_001037099	Cacnb4	3.641	64.704	0.514	0.267	-0.227	0.124	-0.462	0.466	2.299	0.174	2.038	1.632	1.079
NM_001037127	Musk	-1.864	NA	1.074	NA	1.141	NA	1.107	NA	0.002	0.006	0.001	0.002	0
NM_001037128	Musk	-1.416	NA	1.074	NA	0.18	NA	-0.626	NA	0.003	0.012	0.002	0.004	0
NM_001037129	Musk	-1.122	NA	1.074	NA	-0.709	NA	-0.626	NA	0.004	0.01	0.005	0.005	0
NM_001037130	Musk	-1.697	NA	-0.419	NA	0.11	NA	0.781	NA	0.007	0.016	0.008	0.009	0.01
NM_001037134	Ccne2	0.094	0.031	1.323	0.352	0.39	0.121	-0.572	0.298	0.517	0.462	0.281	0.341	0.13
NM_001037136	Agap1	0.078	0.113	-0.263	0.328	0.102	0.079	-0.002	0.002	2.375	2.1	2.307	2.336	2.611
NM_001037143	Pinlyp	1.408	0.306	-2.883	NA	0.18	NA	-3.941	1.036	0.238	0.081	0.014	0.013	0.107
NM_001037166	Gm4925	-0.326	0.094	0.773	0.135	0.371	0.073	0.239	0.065	0.145	0.169	0.138	0.169	0.09
NM_001037167	Samt2	-0.948	NA	NA	NA	NA	NA	NA	NA	0	0.01	0	0	0
NM_001037168	Psg27	NA	NA	1.074	NA	1.141	NA	1.107	NA	0	0	0	0.005	0
NM_001037170	Tomm40l	0.087	0.22	-0.014	0.008	-0.196	0.235	0.05	0.066	7.607	6.744	9.281	7.717	7.285
NM_001037177	Nfatc2	3.568	NA	-0.306	NA	0.963	NA	0.797	0.089	0.016	0	0.014	0.032	0.035
NM_001037178	Nfatc2	NA	NA	NA	NA	NA	NA	NA	NA	0	0	0	0.001	0
NM_001037221	Samd4	0.014	0.009	0.042	0.021	-0.279	0.351	0.516	0.681	0.74	0.683	1.322	1.04	0.94
NM_001037247	Defb36	4.446	9.929	1.08	0.456	-0.076	0.052	1.48	3.473	5.686	0.237	17.324	15.583	6.952
NM_001037248.1	Gm4567	NA	NA	NA	NA	NA	NA	NA	NA	0	0.003	0	0	0
NM_001037248	Gm4567	NA	NA	NA	NA	NA	NA	NA	NA	0	0.003	0	0	0
NM_001037279	Selenoh	-0.256	0.393	-0.276	0.118	0.24	0.143	-0.244	0.181	11.762	13.163	8.728	9.706	11.048
NM_001037294	Alpk2	1.046	0.282	0.652	NA	-0.185	NA	-2.73	0.836	0.03	0.013	0.005	0.005	0.003
NM_001037298	Piezo1	-0.81	9.02	-0.896	1.657	-0.48	0.661	-0.291	0.408	3.058	5.04	3.591	2.444	4.29
NM_001037321	Fbxo40	-1.078	NA	-0.433	NA	-0.36	NA	-0.31	NA	0.005	0.01	0.005	0.002	0.003
NM_001037326	Cstf3	0.673	1.036	-0.061	0.017	0.482	0.31	-1.062	1.801	4.316	2.555	1.551	2.037	1.981
NM_001037493	Slc41a3	2.913	1.695	2.167	0.724	0.031	0.01	0.436	0.186	0.387	0.05	0.534	0.513	0.105
NM_001037502	Defb28	3.183	0.882	-1.66	0.28	0.324	NA	0.096	0.014	0.431	0.044	0.372	0.45	1.361
NM_001037539	Prok2	NA	NA	NA	NA	NA	NA	NA	NA	0	0	0	0	0
NM_001037634	Oosp2	NA	NA	NA	NA	NA	NA	NA	NA	0	0	0	0	0
NM_001037665	Zfp1	0.342	0.784	-0.204	0.066	-0.335	0.423	-0.71	2.33	6.477	4.835	5.205	3.881	4.155
NM_001037707	Zfp27	-0.206	0.672	0.49	0.744	-0.238	0.316	0.01	0.01	3.303	3.585	4.041	3.274	2.174
NM_001037709	Rusc2	-0.38	1.074	-0.213	0.263	-0.794	2.775	0.36	1.006	1.738	2.128	3.965	2.187	2.363
NM_001037711	Cgn	-0.519	0.487	-1.412	1.004	-0.207	0.112	-0.027	0.012	0.359	0.486	0.418	0.349	0.87
NM_001037712	Kcnh6	-1.189	NA	NA	NA	-0.782	NA	-2.321	NA	0.01	0.022	0.004	0	0
NM_001037713	Xaf1	-0.172	0.066	1.514	0.355	-0.633	0.361	0.074	0.025	0.268	0.281	0.455	0.278	0.09
NM_001037716	Gm10439	-0.948	NA	NA	NA	NA	NA	NA	NA	0	0.005	0	0	0
NM_001037717	Slc38a6	-0.116	0.178	0.399	0.471	0.034	0.023	0.04	0.046	2.469	2.525	2.585	2.49	1.771
NM_001037719	Btla	1.046	NA	NA	NA	NA	NA	-2.732	NA	0.013	0.007	0.002	0	0
NM_001037722	Adam15	0.412	0.401	-0.339	0.349	-0.755	1.45	0.065	0.038	2.519	1.79	4.575	2.601	3.095
NM_001037723	Adcy7	-1.982	1.709	-0.546	0.119	0.062	0.013	1.008	0.412	0.031	0.115	0.061	0.061	0.081
NM_001037724	Adcy7	-0.08	0.051	0.169	0.033	0.065	0.019	-3.003	11.516	0.852	0.838	0.104	0.104	0.086
NM_001037725	Fam117b	-0.063	0.246	-0.275	0.557	-0.228	0.625	-0.113	0.37	11.727	11.518	13.174	10.629	12.021
NM_001037726	Creb1	-0.562	0.805	0.327	0.245	0.39	0.268	1.053	2.105	1.325	1.816	2.177	2.689	2.005
NM_001037727	Arhgap25	0.326	0.061	NA	NA	NA	NA	-6.046	2.644	0.105	0.077	0	0.002	0
NM_001037736	Arhgef10	-0.795	8.044	0.121	0.039	-0.699	1.563	-1.053	4.488	3.432	5.627	2.773	1.616	1.405
NM_001037737	Arnt	-0.57	13.506	0.474	1.237	0.035	0.05	-0.004	0.007	15.684	21.888	15.77	15.374	10.302
NM_001037740	Strip2	0.477	0.076	-1.289	NA	-1.91	NA	-1.948	0.392	0.038	0.027	0.043	0.01	0.023
NM_001037741	Gpx4	1.087	1.996	0.51	0.258	-0.009	0.005	0.865	1.795	1.953	0.86	3.734	3.511	2.279
NM_001037742	Tyw5	0.008	0.004	0.464	0.493	0.293	0.363	0.574	0.731	2.796	2.627	3.524	4.093	2.787
NM_001037744	Timm8a2	1.711	NA	-0.445	NA	0.169	NA	0.399	NA	0.036	0.01	0.045	0.046	0.058
NM_001037745	Zfp791	0.061	0.061	-0.253	0.077	0.807	1.271	0.058	0.048	1.6	1.444	0.994	1.63	1.843
NM_001037746	Prps1l3	0.051	0.157	-0.163	0.172	0.206	0.45	-0.783	7.325	12.196	11.087	6.363	6.945	7.284
NM_001037747	Card9	-0.561	0.287	0.388	NA	-0.112	NA	-1.911	1.052	0.294	0.409	0.088	0.077	0.053
NM_001037748.10	Gm20736	NA	NA	NA	NA	NA	NA	NA	NA	0	0	0	0	0
NM_001037748.11	Gm20736	NA	NA	NA	NA	NA	NA	NA	NA	0	0	0	0	0
NM_001037748.1	Gm20736	NA	NA	NA	NA	NA	NA	NA	NA	0	0	0	0	0
NM_001037748.2	Gm20736	NA	NA	NA	NA	NA	NA	NA	NA	0	0	0	0	0
NM_001037748.3	Gm20736	NA	NA	NA	NA	NA	NA	NA	NA	0	0	0	0	0
NM_001037748.4	Gm20736	NA	NA	NA	NA	NA	NA	NA	NA	0	0	0	0	0
NM_001037748.5	Gm20736	NA	NA	NA	NA	NA	NA	NA	NA	0	0	0	0	0
NM_001037748.6	Gm20736	NA	NA	NA	NA	NA	NA	NA	NA	0	0	0	0	0
NM_001037748.7	Gm20736	NA	NA	NA	NA	NA	NA	NA	NA	0	0	0	0	0
NM_001037748.8	Gm20736	NA	NA	NA	NA	NA	NA	NA	NA	0	0	0	0	0
NM_001037748.9	Gm20736	NA	NA	NA	NA	NA	NA	NA	NA	0	0	0	0	0
NM_001037748	Gm20736	NA	NA	NA	NA	NA	NA	NA	NA	0	0	0	0	0
NM_001037749	Slc22a14	0.014	NA	NA	NA	-0.782	NA	-0.816	NA	0.005	0.004	0.005	0	0
NM_001037751	Defb48	NA	NA	NA	NA	NA	NA	NA	NA	0	0	0	0	0
NM_001037752	Defb45	1.443	NA	1.644	NA	-0.168	NA	0.939	0.143	0.131	0.045	0.271	0.244	0.075
NM_001037754	Baiap2	0.537	0.103	1.12	1.279	0.971	0.904	1.283	0.562	0.328	0.221	0.429	0.789	0.337
NM_001037755	Baiap2	-0.378	0.873	-0.495	0.909	-0.291	0.522	0.561	1.412	4.169	5.118	7.77	6.031	7.996
NM_001037756	Brms1l	-0.634	7.154	0.516	2.646	0.04	0.053	0.091	0.211	10.185	14.913	10.948	10.662	6.963
NM_001037757	Washc1	0.215	1.036	0.246	0.303	-0.404	0.916	-0.041	0.063	7.973	6.464	10.547	7.597	5.984
NM_001037758	Btrc	0.144	0.34	0.227	0.499	-0.209	0.43	-0.017	0.029	4.664	3.972	5.495	4.529	3.617
NM_001037759	Sgk3	-0.55	0.507	0.4	0.332	0.096	0.054	1.685	4.403	0.379	0.532	1.202	1.208	0.854
NM_001037761	Capzb	1.485	7.182	1.087	1.245	0.807	0.922	0.934	1.399	3.322	1.105	3.744	6.276	2.73
NM_001037762	Zdhhc12	0.773	2.957	-0.547	0.987	0.028	0.018	0.764	2.341	5.079	2.792	8.697	8.448	11.56
NM_001037764	Rai1	0.062	0.158	-0.14	0.073	0.847	2.224	0.37	0.717	5.73	5.179	4.272	7.292	7.459
NM_001037800	Cd209b	NA	NA	NA	NA	NA	NA	NA	NA	0	0.001	0	0	0
NM_001037801	Cd6	2.254	NA	-2.436	NA	0.18	NA	-2.979	NA	0.03	0.005	0.003	0.003	0.017
NM_001037809	Cdh3	-0.678	8.86	-2.266	53.134	0.488	2.624	0.107	0.236	8.53	12.815	6.78	9.036	40.602
NM_001037810	Spn	-3.216	NA	NA	NA	-3.255	NA	NA	NA	0	0.032	0.036	0.003	0
NM_001037812	Tmem237	-0.098	0.21	-0.061	0.045	-0.199	0.244	0.197	0.417	9.283	9.364	12.722	10.422	10.183
NM_001037822	Krtap5-5	NA	NA	NA	NA	NA	NA	NA	NA	0	0	0	0	0
NM_001037841	Cklf	0.415	0.666	-0.281	0.151	0.032	0.019	-0.214	0.227	1.689	1.195	1.473	1.435	1.613
NM_001037842	Nat8f3	-2.036	NA	NA	NA	NA	NA	-1.46	NA	0.007	0.034	0	0	0
NM_001037846	Cnot2	0.342	3.554	0.071	0.07	0.226	0.465	-0.185	0.574	23.68	17.585	18.481	20.451	18.193
NM_001037847	Cnot2	0.269	0.282	0.472	0.535	0.6	1.09	-1.008	3.102	5.195	4.076	1.763	2.53	1.712
NM_001037848	Cnot2	1.123	0.429	0.237	0.049	0.26	0.066	0.601	0.242	0.331	0.131	0.438	0.503	0.393
NM_001037859	Csf1r	-0.907	2.812	0.51	0.128	-0.2	0.05	-4.686	30.527	5.173	9.06	0.233	0.199	0.129
NM_001037863	Atp11c	0.438	1.788	-0.202	0.242	0.883	3.586	-0.11	0.183	9.928	6.851	5.189	9.008	9.703
NM_001037865	Col28a1	-5.095	1.473	-0.794	NA	2.023	NA	1.985	NA	0	0.04	0	0.005	0.008
NM_001037877	Tcf25	-0.242	1.266	0.227	0.625	-0.215	0.74	0.475	3.44	23.538	26.114	39.181	32.093	25.654
NM_001037878	Tcf25	-0.336	2.122	-0.355	0.348	-0.937	2.707	-0.071	0.08	14.737	17.504	27.616	13.74	16.475
NM_001037905	Dab2	0.119	0.055	-0.282	NA	-2.385	NA	-5.918	10	0.8	0.684	0.068	0.012	0.014
NM_001037906	Nell1	2.961	27.381	2.246	1.05	-0.764	2.353	0.78	2.3	16.061	1.912	48.236	26.946	5.399
NM_001037907	Ripply2	4.046	5.957	1.589	0.384	0.681	0.177	-2.139	2.475	2.487	0.141	0.362	0.553	0.168
NM_001037909	C130026I21Rik	2.461	NA	0.112	NA	1.141	NA	-1.343	NA	0.013	0	0	0.006	0.004
NM_001037913	Ccdc107	0.095	0.15	0.101	0.082	-0.228	0.24	0.144	0.24	16.329	14.307	21.646	17.678	15.434
NM_001037914	Mcidas	0.017	NA	-0.767	NA	0.254	NA	0.181	NA	0.008	0.008	0.008	0.009	0.014
NM_001037915	Ripply1	NA	NA	0.112	NA	1.141	NA	1.107	NA	0	0	0	0.016	0.011
NM_001037916	Ccdc17	0.612	0.187	0.867	0.144	-0.206	0.039	-0.152	0.034	0.145	0.088	0.153	0.131	0.065
NM_001037917	Gm6377	-0.496	0.17	-0.002	0	-0.203	NA	-1.106	0.497	0.163	0.211	0.091	0.075	0.071
NM_001037918	Lipt1	0.473	0.709	-0.23	0.179	0.256	0.247	0.26	0.288	2.461	1.679	2.548	2.901	3.187
NM_001037919	Gm6460	NA	NA	NA	NA	NA	NA	NA	NA	0	0	0	0	0
NM_001037922	Cks1brt	0.436	NA	1.012	NA	1.712	NA	2.206	0.427	0.01	0.007	0.015	0.05	0.023
NM_001037923	Lekr1	0.491	1.173	0.682	0.572	0.072	0.038	-1.1	4.089	2.502	1.677	1.154	1.144	0.673
NM_001037925	BC147527	-0.885	NA	NA	NA	NA	NA	-0.816	NA	0.005	0.01	0	0	0
NM_001037926	Zfp987	1.141	1.759	-0.066	0.024	0.815	0.508	0.144	0.098	0.638	0.276	0.421	0.699	0.681
NM_001037927	Wdr93	1.352	0.569	0.461	0.087	-0.218	0.053	0.151	0.043	0.137	0.05	0.185	0.148	0.099
NM_001037928	Gm11992	0.028	0.006	0.213	0.044	0.007	0.002	0.51	0.182	0.14	0.129	0.206	0.194	0.158
NM_001037929	Gm14092	-0.948	NA	NA	NA	NA	NA	NA	NA	0	0.005	0	0	0
NM_001037931	Gm6878	-1.838	NA	NA	NA	-1.67	NA	NA	NA	0	0.009	0.009	0	0
NM_001037932	Gm11437	-0.929	NA	1.231	NA	-0.36	NA	2.306	NA	0.01	0.015	0.056	0.04	0.017
NM_001037933	Defb23	-0.948	NA	-1.673	NA	-0.782	NA	NA	NA	0	0.015	0.016	0	0.027
NM_001037937	Deptor	-1.214	0.529	-1.815	0.336	-2.139	0.617	-2.74	1.468	0.072	0.155	0.049	0.011	0.036
NM_001037938	Dhrs4	-0.364	2.351	0.275	0.243	-0.069	0.093	-0.619	3.375	21.815	26.422	15.391	13.937	10.72
NM_001037940	Dnajb6	0.213	1.397	-0.526	2.823	0.085	0.19	0.099	0.314	15.101	12.228	15.752	15.886	21.386
NM_001037941	Dnajb6	1.043	1.516	-0.505	0.353	1.331	1.506	-0.804	0.963	2.578	1.177	0.604	1.468	1.935
NM_001037955	Dusp22	-0.114	0.223	0.351	0.392	-0.511	2.486	0.101	0.184	3.666	3.736	5.787	3.858	2.808
NM_001037957	Dyrk1b	0.613	4.466	-0.63	0.336	-1.397	1.908	-1.894	4.256	11.895	7.282	8.736	3.111	4.548
NM_001037987	Edil3	-3	11.011	3.326	1.078	-1.44	2.083	-0.545	0.281	0.273	2.076	0.527	0.184	0.018
NM_001037997	Fer	-0.896	14.183	0.528	1.234	-0.06	0.063	0.775	3.543	7.173	12.542	13.237	12.09	7.81
NM_001037999	Dbi	0.623	0.128	-0.327	0.053	-0.173	0.03	1.046	0.329	0.281	0.162	0.627	0.545	0.628
NM_001038010	Kat2a	0.311	1.496	-0.289	0.955	0.229	0.753	-0.34	2.328	21.05	15.921	14.652	16.323	18.645
NM_001038015	Gnpda2	0.232	0.583	0.281	0.296	-0.165	0.193	0.323	0.751	7.042	5.618	10.248	8.665	6.664
NM_001038018	Grk6	-0.079	0.295	-0.354	0.372	-0.416	0.901	-0.59	2.263	26.198	25.993	23.994	17.052	20.401
NM_001038230	Anapc11	-0.706	5.688	-0.075	0.058	0.097	0.088	-0.232	0.475	4.712	7.211	3.854	3.933	3.88
NM_001038231	Banf1	0.777	0.786	0.524	0.075	3.372	1.478	3.13	2.436	2.381	1.3	2.002	20.674	13.305
NM_001038492	Ctsa	0.304	0.979	-0.592	0.404	-0.2	0.124	-0.915	1.967	4.574	3.478	2.866	2.372	3.351
NM_001038499	Arsi	-1.972	9.077	1.402	0.226	-1.19	0.694	-2.242	3.301	0.827	3.073	0.413	0.17	0.058
NM_001038500	Esp1	NA	NA	-0.849	NA	NA	NA	NA	NA	0	0	0	0	0.007
NM_001038587	Adar	0.444	2.848	-0.783	4.589	-0.075	0.098	-0.029	0.052	6.272	4.356	6.672	6.026	9.705
NM_001038589	Usp14	0.284	0.173	0.759	0.478	-0.137	0.064	0.19	0.101	0.5	0.384	0.651	0.56	0.312
NM_001038590	Cldn19	0.915	NA	NA	NA	NA	NA	-1.72	NA	0.022	0.016	0	0	0
NM_001038592	Glrx2	0.21	0.618	-0.037	0.025	-0.102	0.13	-0.223	0.515	5.087	4.121	4.828	4.267	4.093
NM_001038593	Glrx2	-2.136	0.658	1.922	0.353	2.22	0.644	4.346	3.695	0.012	0.055	0.062	0.259	0.065
NM_001038594	Glrx2	-1.189	0.285	2.421	0.442	2.531	0.788	3.293	1.461	0.028	0.061	0.048	0.269	0.048
NM_001038602	Marveld2	0.247	0.268	-2.165	4.668	0.227	0.143	-1.028	2.991	1.63	1.285	0.709	0.783	3.312
NM_001038604	Clec5a	-1.384	0.527	-0.849	NA	-0.782	NA	-4.389	0.856	0.033	0.076	0.001	0.001	0.001
NM_001038607	Kcnh1	-2.25	15.299	-0.377	0.092	0.629	0.309	0.443	0.277	0.219	0.987	0.202	0.294	0.36
NM_001038608	Txnl4a	0.141	0.477	-0.413	0.538	-0.206	0.246	-0.791	3.174	42.405	36.225	29.182	24.02	29.989
NM_001038609	Mapt	-1.181	0.307	-2.261	0.189	-2.685	0.53	-1.258	0.182	0.029	0.061	0.078	0.014	0.052
NM_001038610	Dach1	0.844	8.899	-1.771	9.97	1.083	1.676	-1.144	5.207	15.881	8.295	3.538	7.026	22.439
NM_001038612	Olfm1	-1.495	1.426	-1.428	2.075	-1.232	1.362	0.141	0.045	0.572	1.508	1.503	0.612	1.559
NM_001038613	Olfm1	-2.188	43.382	0.497	0.236	-0.123	0.067	0.643	0.922	1.603	6.864	2.839	2.47	1.618
NM_001038614	Olfm1	-2.524	1.666	3.631	1.559	0.843	0.25	0.942	0.243	0.243	1.298	0.282	0.44	0.033
NM_001038616	Dmrtc1a	0.014	NA	NA	NA	NA	NA	-0.816	NA	0.01	0.008	0	0	0.008
NM_001038619	Dnm3	-0.801	0.13	-1.446	NA	1.788	NA	-0.081	0.008	0.01	0.016	0.003	0.009	0.021
NM_001038621	Rabgap1l	-0.931	6.063	0.455	0.598	0.274	0.284	1.162	4.614	1.659	2.968	3.193	3.648	2.48
NM_001038624	Ric3	-0.492	0.4	-0.664	0.117	0.636	0.13	-1.646	0.837	0.285	0.379	0.059	0.087	0.132
NM_001038625	Sertad2	-0.559	12.167	0.488	1.749	-0.256	0.452	-0.348	2.002	8.285	11.468	8.089	6.382	4.255
NM_001038627	Smurf1	-0.557	3.95	0.111	0.083	-0.493	3.964	0.257	0.79	6.647	9.198	11.602	7.812	6.737
NM_001038635	Stk35	-0.808	1.635	-0.215	0.14	-0.359	0.51	0.817	1.332	0.836	1.377	1.95	1.449	1.572
NM_001038637	Gng2	-0.422	2.458	0.161	0.25	0.127	0.226	1.044	9.88	8.439	10.624	16.503	17.071	14.232
NM_001038641	Slx4ip	-1.529	1.006	-0.861	0.312	-0.159	0.046	0.972	0.41	0.073	0.199	0.164	0.141	0.237
NM_001038642	Ets1	-1.401	6.186	1.061	0.562	1.281	0.712	-0.967	0.992	0.784	1.953	0.175	0.393	0.175
NM_001038643	Slco3a1	-0.59	3.377	0.18	0.082	0.503	0.905	0.928	8.423	3.653	5.151	5.027	6.809	5.662
NM_001038651	Zfp953	0.362	0.708	0.211	0.155	0.414	0.492	-0.633	1.464	1.494	1.095	0.752	0.947	0.764
NM_001038653	Slc16a3	0.394	0.198	-0.903	1.034	-0.559	0.543	-2.778	11.453	16.034	11.308	3.553	2.278	4.032
NM_001038654	Slc16a3	0.286	0.211	-0.615	0.577	-0.438	0.596	-0.914	1.549	4.579	3.484	3.391	2.369	3.42
NM_001038655	Gng7	-0.323	0.081	0.62	0.097	-0.172	0.028	1.176	0.347	0.058	0.07	0.157	0.129	0.081
NM_001038658	Faim2	1.133	NA	-2.089	NA	0.254	NA	-1.915	NA	0.016	0.008	0.004	0.004	0.018
NM_001038660	Slc7a15	NA	NA	NA	NA	NA	NA	NA	NA	0	0	0	0	0
NM_001038663	Mapk1	0.07	0.225	-0.121	0.099	0.417	1.381	0.096	0.182	22.338	19.978	18.465	23.495	23.902
NM_001038664	Gngt2	-6.544	3.948	1.698	NA	-1.376	0.32	4.742	0.658	0	0.819	0.656	0.229	0.078
NM_001038676	Obox7	-0.948	NA	NA	NA	NA	NA	NA	NA	0	0.007	0	0	0
NM_001038695	Kdm3a	0.209	0.83	-0.19	0.204	-0.021	0.017	-0.797	4.218	12.964	10.544	7.785	7.3	7.802
NM_001038696	Rnpc3	0.29	0.309	0.81	3.166	0.397	0.318	0.379	0.445	2.81	2.161	2.898	3.565	1.903
NM_001038697	Fthl17f	NA	NA	NA	NA	NA	NA	NA	NA	0	0	0	0	0
NM_001038698	Elavl4	5.282	6.581	2.467	1.614	0.427	0.305	2.901	8.82	0.366	0.011	2.116	2.702	0.457
NM_001038699	Fn3k	1.328	0.95	1.277	NA	-0.671	NA	-2.957	2.691	0.191	0.071	0.042	0.024	0.009
NM_001038700	Fnbp1	0.738	0.16	-0.849	NA	-2.264	NA	-5.631	1.651	0.064	0.036	0.005	0.001	0.001
NM_001038701	Gabrb3	-0.851	0.819	-0.097	0.018	1.564	1.18	0.102	0.043	0.311	0.522	0.114	0.325	0.323
NM_001038703	Gpr146	3.438	2.837	1.716	0.521	-0.672	0.248	-0.251	0.066	0.402	0.033	0.554	0.331	0.095
NM_001038708	Cdc42se1	-1.593	2.495	0.555	0.964	0.607	0.771	3.407	19.088	0.762	2.175	5.609	7.989	5.095
NM_001038710	Tmod2	0.923	1.516	-0.743	0.86	0.518	0.681	0.176	0.172	0.653	0.33	0.537	0.728	1.14
NM_001038839	P2rx7	-2.081	0.362	NA	NA	-2.316	NA	-2.703	NA	0.014	0.061	0.014	0	0.002
NM_001038845	P2rx7	4.682	0.452	-2.436	NA	-1.964	NA	-3.564	0.367	0.083	0	0.028	0.009	0.036
NM_001038846	Rcsd1	-0.047	0.066	-0.529	0.629	-0.31	0.462	0.063	0.069	10.519	10.166	14.088	10.767	14.627
NM_001038887	P2rx7	-2.819	NA	1.074	NA	1.141	NA	1.107	NA	0	0.039	0	0.019	0
NM_001038993	Rnf38	0.276	0.186	0.605	0.36	1.428	1.995	1.57	1.18	2.038	1.559	2.316	5.907	3.608
NM_001038995	Gm4787	0.008	0.003	0.045	0.011	-0.199	0.089	0.166	0.079	0.392	0.363	0.521	0.431	0.391
NM_001038996	Try10	-5.695	0.819	NA	NA	NA	NA	NA	NA	0	0.303	0	0	0
NM_001038997	Gm5771	-3.422	NA	NA	NA	NA	NA	NA	NA	0	0.064	0	0	0
NM_001038998	Svbp	-0.318	0.312	0.448	0.17	-0.08	0.036	-0.714	0.854	2.806	3.309	1.872	1.672	1.146
NM_001038999	Atp8a1	-0.753	3.703	0.967	1.375	-0.943	1.994	-0.454	0.637	0.945	1.493	1.365	0.673	0.324
NM_001039000	Kif5a	-0.071	0.033	0.789	0.305	-0.074	0.021	-0.418	0.243	0.14	0.138	0.116	0.104	0.055
NM_001039038	Nhlrc4	-4.012	NA	2.068	NA	-0.326	NA	3.07	NA	0	0.038	0.026	0.021	0.004
NM_001039039	Kctd21	-0.323	0.556	0.364	0.321	-0.39	0.603	0.21	0.272	1.156	1.357	1.808	1.311	0.95
NM_001039042	Klk13	-3.487	0.69	0.112	NA	-1.342	NA	0.145	NA	0.011	0.105	0.03	0.009	0.009
NM_001039045	Pigc	-0.105	0.257	0.496	1	-0.442	1.18	-0.126	0.209	4.609	4.662	5.939	4.137	2.748
NM_001039047	Trim58	-3.253	0.759	-0.711	NA	0.18	NA	-0.499	NA	0.007	0.07	0.004	0.004	0.008
NM_001039048	Trim63	3.934	47.061	0.103	0.06	-0.82	3.959	-0.68	2.873	7.768	0.471	8.842	4.745	4.157
NM_001039049	Cox8c	NA	NA	NA	NA	NA	NA	NA	NA	0	0	0	0	0
NM_001039050	Pkib	NA	NA	NA	NA	NA	NA	NA	NA	0	0	0	0	0
NM_001039051	Pkib	-2.561	1.129	4.032	NA	1.725	NA	0.129	0.011	0.016	0.086	0.006	0.016	0.002
NM_001039052	Pkib	3.202	NA	0.565	NA	0.613	NA	-0.117	NA	0.008	0	0.005	0.009	0.006
NM_001039053	Pkib	2.78	NA	0.15	NA	0.782	NA	-0.109	NA	0.006	0	0.004	0.006	0.005
NM_001039056	Kcnj15	-2.65	0.436	1.147	NA	1.174	NA	1.043	NA	0.006	0.024	0.006	0.008	0.003
NM_001039057	Kcnj15	-2.176	NA	1.956	NA	0.136	NA	1.023	NA	0.002	0.01	0.002	0.003	0.001
NM_001039059	Klhl15	4.335	NA	NA	NA	NA	NA	-4.174	NA	0.034	0	0	0	0
NM_001039060	Klhl15	0.256	0.137	-0.395	0.246	1.421	1.326	-0.622	0.474	0.554	0.439	0.138	0.353	0.434
NM_001039061	Klhl15	0.09	0.1	0.22	0.129	0.129	0.108	-0.127	0.151	2.128	1.884	1.851	1.908	1.539
NM_001039071	Ldb3	-0.865	0.127	1.313	NA	-0.994	NA	0.822	0.096	0.017	0.029	0.058	0.029	0.011
NM_001039072	Ldb3	-0.252	NA	-2.651	NA	-1.884	NA	0.964	NA	0.003	0.005	0.026	0.006	0.037
NM_001039073	Ldb3	-0.963	0.099	0.772	NA	3.324	NA	0.546	0.048	0.015	0.028	0.002	0.02	0.011
NM_001039074	Ldb3	3.155	0.534	0.189	NA	1.153	NA	-0.173	0.016	0.034	0.003	0.015	0.031	0.023
NM_001039075	Ldb3	NA	NA	2.006	NA	1.111	NA	2.046	NA	0	0	0.01	0.016	0
NM_001039076	Ldb3	NA	NA	NA	NA	-2.715	NA	NA	NA	0	0	0.021	0	0
NM_001039077	Plpbp	0.734	1.89	0.545	0.684	0.155	0.143	-0.182	0.222	3.193	1.812	2.596	2.766	1.771
NM_001039078	Plpbp	-0.228	0.059	-1.271	0.228	-0.357	NA	-1.029	0.249	0.248	0.285	0.162	0.13	0.27
NM_001039079	Prkcz	-0.379	0.035	-1.609	NA	-0.585	NA	-0.966	0.071	0.028	0.033	0.023	0.014	0.039
NM_001039080	Rbms2	-1.523	11.676	1.342	1.828	-0.868	1.492	-0.571	0.755	0.824	2.227	1.048	0.544	0.2
NM_001039081	Mier1	0.069	0.141	0.129	0.127	0.262	0.528	0.25	0.865	10.278	9.174	10.587	11.972	10.272
NM_001039084	Mrpl1	1.154	3.687	-0.594	0.965	0.01	0.006	-0.391	0.622	2.911	1.238	2.267	2.182	3.076
NM_001039086	Rapgef1	-0.257	0.386	-0.405	0.133	-0.365	0.158	-0.731	0.575	0.938	1.051	0.755	0.551	0.692
NM_001039087	Rapgef1	-0.454	0.226	0.374	0.134	0.866	0.611	1.49	1.654	0.084	0.109	0.137	0.235	0.168
NM_001039088	Seh1l	0.139	0.541	0.182	0.258	0.431	1.375	0.357	2.064	39.465	33.586	38.946	49.554	40.874
NM_001039089	Sel1l	-0.363	3.34	0.332	1.474	-0.214	0.928	0.498	3.938	14.387	17.371	24.351	19.928	14.779
NM_001039090	Skil	0.108	0.218	0.011	0.009	-0.549	1.398	0.588	4.078	7.392	6.406	16.911	10.895	10.081
NM_001039092	Tom1l2	-0.298	0.218	0.733	0.264	-0.575	0.29	0.19	0.085	0.61	0.694	1.087	0.678	0.383
NM_001039093	Tom1l2	0.291	0.261	0.559	0.425	-0.236	0.17	-0.279	0.238	1.037	0.803	1.045	0.843	0.533
NM_001039094	Negr1	0.981	6.996	2.384	6.353	0.009	0.007	-0.465	1.081	8.15	3.886	6.056	5.798	1.041
NM_001039095	Glt6d1	NA	NA	NA	NA	NA	NA	NA	NA	0	0	0	0	0
NM_001039103	Rasa4	2.034	0.778	1.449	NA	-1.185	NA	-1.732	0.567	0.126	0.027	0.09	0.038	0.012
NM_001039104	Trpm1	-0.948	NA	NA	NA	NA	NA	NA	NA	0	0.002	0	0	0
NM_001039105	Kcnrg	-0.363	0.065	0.81	0.165	-0.258	0.058	1.535	0.609	0.08	0.096	0.284	0.23	0.123
NM_001039106	Ddhd1	0.681	1.46	0.766	1.901	0.662	0.571	0.217	0.268	0.919	0.539	0.702	1.047	0.577
NM_001039114	Acsbg2	0.976	NA	0.616	NA	2.625	NA	1.629	NA	0.004	0	0	0.012	0.008
NM_001039115	Zkscan4	0.834	1.338	0.196	0.037	-0.191	0.053	-1.704	2.175	0.971	0.515	0.352	0.291	0.239
NM_001039116	Dmrtc1b	NA	NA	NA	NA	NA	NA	NA	NA	0	0	0	0	0
NM_001039119	Defb33	NA	NA	NA	NA	NA	NA	NA	NA	0	0	0	0	0
NM_001039120	Defb26	0.976	NA	-1.866	NA	1.141	NA	0.145	NA	0.018	0	0	0.017	0.06
NM_001039121	Defb43	NA	NA	NA	NA	NA	NA	NA	NA	0	0	0	0	0
NM_001039122	Defb25	2.504	7.348	0.411	0.107	0.117	0.082	1.461	6.188	9.629	1.572	25.088	25.956	18.477
NM_001039123	Defb18	NA	NA	NA	NA	NA	NA	NA	NA	0	0	0	0	0
NM_001039124	Kncn	-0.948	NA	-0.849	NA	NA	NA	NA	NA	0	0.008	0	0	0.007
NM_001039125	Defb47	NA	NA	NA	NA	-0.782	NA	NA	NA	0	0	0.029	0	0
NM_001039126	Asb1	-0.155	0.189	0.287	0.208	-0.879	2.577	-0.425	0.902	2.309	2.446	3.261	1.683	1.289
NM_001039128	Tas2r122	NA	NA	NA	NA	NA	NA	NA	NA	0	0	0	0	0
NM_001039129	Hnrnpa1	1.091	18.028	-0.421	0.765	0.312	0.438	-1.126	8.982	408.532	179.384	157.103	182.989	229.832
NM_001039137	Scoc	-0.771	0.222	1.551	0.965	1.976	0.69	4.065	1.73	0.533	0.875	2.44	8.984	2.849
NM_001039138	Camk2g	0.11	0.192	-0.266	0.51	-0.017	0.018	0.192	0.58	5.892	5.153	7.046	6.615	7.417
NM_001039139	Camk2g	-0.588	6.3	0.021	0.008	-0.417	0.81	-0.388	1.303	5.394	7.631	5.712	4.04	3.727
NM_001039143	Nlrp5	-1.82	NA	1.932	NA	0.115	NA	1.965	NA	0.003	0.007	0.005	0.003	0.001
NM_001039147	Morf4l1	-0.254	1.776	0.111	0.046	-0.281	0.275	-0.684	1.578	15.206	17.073	11.88	9.234	8.02
NM_001039149	Cd226	0.976	NA	NA	NA	NA	NA	-0.816	NA	0.004	0	0	0	0
NM_001039150	Cd44	-3.06	0.801	0.981	0.656	0.666	0.36	6.373	9.68	0.008	0.061	0.424	0.625	0.299
NM_001039151	Cd44	-0.216	0.428	0.835	2.809	-0.002	0.002	4.261	129.046	3.699	4.027	73.644	69.636	36.484
NM_001039153	Tctn1	0.299	0.832	0.924	3.043	-0.464	1.835	0.009	0.01	5.803	4.418	8.325	5.718	2.833
NM_001039154	Cdh8	-0.211	0.021	NA	NA	NA	NA	-4.304	NA	0.029	0.031	0	0	0
NM_001039155	Triobp	0.945	2.296	0.204	0.076	1.425	2.479	0.768	0.921	2.383	1.151	1.551	4.007	3.21
NM_001039156	Triobp	0.642	1.005	0.408	0.149	0.086	0.056	-1.316	5.581	1.682	1.01	0.657	0.663	0.462
NM_001039157	Ube2j2	0.683	0.877	0.055	0.018	0.37	0.244	0.664	0.765	0.53	0.312	0.673	0.824	0.745
NM_001039158	Ube2j2	0.001	0.001	-0.568	1.36	0.464	1.123	0.287	0.395	1.819	1.703	1.666	2.18	3.017
NM_001039159	Ube2j2	-0.606	0.509	0.311	0.066	1.497	1.692	1.104	0.939	0.425	0.612	0.334	0.906	0.67
NM_001039160.1	Gvin1	-0.627	0.169	-0.433	NA	1.133	NA	-2.966	0.731	0.018	0.029	0.001	0.002	0.002
NM_001039160	Gvin1	-1.579	1.022	0.808	NA	2.354	NA	-2.346	0.867	0.03	0.081	0.001	0.006	0.002
NM_001039162	Clip2	-2.037	50.655	-0.348	0.299	-0.65	2.222	0.282	0.537	6.151	23.779	12.114	7.34	8.716
NM_001039167	Rbfox3	3.682	NA	1.074	NA	1.141	NA	-2.565	NA	0.016	0.001	0	0.003	0
NM_001039168	Rbfox3	2.155	NA	3.715	NA	0.553	NA	0.663	NA	0.009	0.003	0.013	0.014	0
NM_001039169	Eif4e2	0.071	0.183	-0.213	0.415	0.142	0.211	0.277	1.145	16.017	14.321	18.096	19.075	20.647
NM_001039170	Eif4e2	0.734	5.133	-0.163	0.111	0.411	0.566	0.628	1.732	9.439	5.314	11.243	14.357	14.948
NM_001039173	Dok6	-0.25	0.06	0.461	0.061	-0.414	NA	-0.449	0.124	0.249	0.284	0.249	0.18	0.119
NM_001039175	Elovl1	0.342	0.124	1.841	0.247	0.701	0.172	0.052	0.015	0.278	0.203	0.187	0.282	0.076
NM_001039176	Elovl1	-0.007	0.002	0.335	0.107	-0.227	0.089	1.478	1.286	0.165	0.157	0.54	0.44	0.324
NM_001039179	Bicd2	0.772	7.23	-0.857	3.091	0.04	0.031	-0.55	1.877	3.503	1.933	2.423	2.344	3.985
NM_001039180	Bicd2	-0.277	0.274	0.668	0.369	1.131	1.441	1.865	3.885	1.291	1.468	2.228	4.622	2.715
NM_001039181	Npr3	-2.066	14.881	1.074	1.936	0.47	0.525	2.045	10.6	0.522	2.047	1.623	2.117	0.94
NM_001039184	Cep350	-0.08	0.275	0.441	1.002	0.146	0.201	0.53	2.226	5.898	5.863	7.975	8.37	5.748
NM_001039185	Ceacam1	-0.801	0.213	2.115	0.409	1.794	0.362	1.276	0.275	0.052	0.091	0.038	0.131	0.027
NM_001039186	Ceacam1	-0.338	0.147	1.321	0.159	-0.357	0.046	0.014	0.002	0.146	0.173	0.192	0.148	0.054
NM_001039187	Ceacam1	-1.638	0.543	4.143	NA	-2.746	1.22	-0.716	0.122	0.051	0.152	0.209	0.033	0.001
NM_001039188	Rreb1	0.952	0.231	-1.63	0.177	-1.58	0.399	-1.317	0.35	0.046	0.023	0.059	0.02	0.055
NM_001039189	Fars2	0.882	0.293	-1.67	0.19	-2.104	0.497	-1.732	0.53	0.259	0.136	0.333	0.076	0.225
NM_001039192	Gmfg	-0.64	0.548	-1.798	NA	NA	NA	-7.32	5.48	0.941	1.372	0	0	0.023
NM_001039194	Aifm2	-0.316	0.981	0.885	2.076	-0.634	2.056	-0.373	0.912	2.754	3.23	3.409	2.083	1.057
NM_001039195	Gria2	-0.181	0.039	1.315	0.288	1.375	NA	0.851	0.269	0.051	0.055	0.037	0.089	0.035
NM_001039198	Zfhx2	1.412	27	0.023	0.01	0.145	0.279	0.748	5.133	6.12	2.153	9.61	10.097	9.31
NM_001039200	Emc1	-0.211	1.255	-0.074	0.104	-0.307	0.922	-0.134	0.569	8.856	9.661	10.294	7.918	7.792
NM_001039201	Hdhd2	-0.247	0.182	-0.203	0.059	-0.451	0.213	-0.592	0.53	0.984	1.102	0.925	0.633	0.694
NM_001039202	Hdhd2	0.395	0.282	-0.755	0.317	-0.172	0.043	-0.948	0.74	0.856	0.612	0.507	0.427	0.681
NM_001039209	Zfp982	1.176	4.665	-0.506	0.524	0.362	0.438	0.39	0.711	8.493	3.503	9.015	10.878	14.531
NM_001039214	Mex3c	0.095	0.547	-0.19	0.324	0.001	0.002	-0.264	1.236	38.038	33.48	32.84	31.021	33.163
NM_001039218	Spink14	NA	NA	NA	NA	NA	NA	NA	NA	0	0	0	0	0
NM_001039219	Gal3st2c	3.488	NA	0.48	NA	0.524	NA	0.349	0.065	0.028	0.002	0.025	0.035	0.024
NM_001039220	AI429214	0.769	2.458	0.474	0.752	-0.347	0.575	0.283	0.54	2.455	1.36	3.928	2.935	1.967
NM_001039223	Gm14137	0.216	0.1	-0.184	0.034	0.189	0.048	-0.809	0.528	0.362	0.295	0.191	0.202	0.212
NM_001039228	Gm6583	1.934	0.763	-0.838	NA	-0.656	NA	-1.926	0.801	0.16	0.038	0.069	0.041	0.068
NM_001039231	Zfp951	0.407	1.317	0.44	0.425	0.013	0.007	-0.921	2.898	3.16	2.246	1.706	1.643	1.128
NM_001039238	Dcpp2	NA	NA	NA	NA	NA	NA	NA	NA	0	0	0	0	0
NM_001039239	Zfp808	-0.443	1.244	0.253	0.349	0.649	1.345	-0.28	0.447	5.918	7.543	3.233	4.772	3.731
NM_001039240	Gm7073	NA	NA	NA	NA	NA	NA	NA	NA	0	0	0	0	0
NM_001039242	2020-03-10	3.638	NA	-1.539	NA	NA	NA	-3.482	NA	0.047	0	0.002	0	0.014
NM_001039243	Erich4	0.212	0.03	-0.534	NA	0.594	NA	-1.076	0.158	0.096	0.078	0.03	0.044	0.061
NM_001039244	Tmem267	0.077	0.127	-0.142	0.223	0.442	0.865	0.572	2.776	9.107	8.128	10.384	13.28	13.713
NM_001039347	Kcnd3	-1.676	7.54	0.42	0.184	0.451	1.331	3.17	77.552	0.717	2.184	4.875	6.349	4.468
NM_001039351	Nolc1	0.111	0.023	-0.736	0.175	0.595	NA	0.111	0.024	0.055	0.045	0.039	0.056	0.087
NM_001039352	Nolc1	0.277	2.691	-0.56	3.029	0.775	5.669	-0.266	1.114	41.779	32.492	20.93	34.177	47.042
NM_001039353	Nolc1	-0.145	0.182	-0.542	0.424	1.309	2.799	0.861	1.737	1.717	1.778	1.286	3.073	4.15
NM_001039354	Lin7a	0.941	0.724	-0.236	0.09	-0.023	0.013	2.882	14.346	0.152	0.074	1.177	1.098	1.195
NM_001039356	Hmga1	0.147	0.186	-0.027	0.012	0.659	0.728	0.083	0.085	4.244	3.607	2.897	4.407	4.196
NM_001039363	Tsc2	0.049	0.142	-0.077	0.083	-0.168	0.512	0.196	0.874	10.904	9.923	14.531	12.265	12.117
NM_001039365	Mobp	NA	NA	NA	NA	NA	NA	NA	NA	0	0	0	0	0
NM_001039368	Polr2k	0.591	1.554	-0.43	0.439	-0.046	0.029	-0.591	1.382	7.834	4.882	5.528	5.119	6.396
NM_001039371	Slc22a15	-0.884	3.403	0.775	0.68	-0.835	1.668	-0.446	0.66	0.517	0.9	0.698	0.371	0.201
NM_001039373	Mtcp1	-0.093	0.078	-0.005	0.002	-0.179	0.148	-0.421	0.556	2.409	2.426	2.111	1.766	1.653
NM_001039376	Pde4dip	2.082	1.511	0.577	0.109	-0.954	0.332	-1.042	0.491	0.109	0.024	0.104	0.051	0.033
NM_001039385	Vgf	0.087	0.021	-2.339	2.496	-0.579	0.51	4.003	15.679	0.098	0.088	2.427	1.548	7.417
NM_001039386	Nsmf	0.123	0.074	0.494	0.241	-1.212	1.538	-1.425	4.983	2.438	2.082	2.139	0.886	0.587
NM_001039387	Nsmf	-0.086	0.296	0.066	0.048	-0.583	2.696	0.008	0.011	10.84	10.834	16.864	10.681	9.549
NM_001039388	Wdr37	-2.961	2.659	0.906	0.816	-0.19	0.087	3.9	6.643	0.035	0.265	0.67	0.55	0.273
NM_001039389	Wdr37	-0.176	0.251	0.118	0.082	-0.06	0.031	0.271	0.395	1.491	1.589	1.966	1.761	1.523
NM_001039390	Pkig	1.178	4.625	0.298	0.21	0.482	0.537	-0.046	0.034	5.94	2.461	4.225	5.654	4.3
NM_001039391	Pkig	1.005	11.012	-0.013	0.01	-0.092	0.116	0.304	1.125	27.13	12.66	36.741	32.843	31.019
NM_001039392	Tmsb10	-0.159	0.108	0.4	0.273	0.54	0.685	1.588	4.192	2.647	2.763	5.607	7.788	5.484
NM_001039394	Rab43	-0.548	5.565	0.321	0.319	-0.686	1.726	0.837	3.736	5.627	7.733	16.666	9.848	7.413
NM_001039466	Trim46	1.712	5.012	-0.379	0.303	-0.179	0.195	0.628	1.664	1.3	0.374	2.337	1.97	2.414
NM_001039472	Kif21b	-0.979	11.925	-1.355	34.172	-0.293	1.45	1.672	49.592	2.382	4.398	9.599	7.452	17.806
NM_001039474	Tcerg1	0.136	0.532	-0.173	0.166	0.862	4.363	0.281	0.668	26.294	22.521	18.198	31.416	33.02
NM_001039478	Lrif1	-0.196	0.166	-0.134	0.058	0.576	0.589	0.397	0.411	2.016	2.163	1.861	2.603	2.662
NM_001039482	Klhl20	-0.26	1.645	0.184	0.193	0.381	0.963	0.732	4.669	6.618	7.462	8.756	10.814	8.883
NM_001039483	Tmco1	-0.051	0.167	-0.079	0.046	0.344	0.773	-0.178	0.422	16.739	16.304	11.986	14.555	14.29
NM_001039484	Kcnj10	-2.148	1.825	1.019	0.329	-0.135	0.032	1.017	0.445	0.042	0.179	0.098	0.084	0.038
NM_001039485	Piezo2	-2.419	108.095	0.471	0.295	-0.335	0.483	-2.239	54.992	4.805	24.147	1.337	1	0.667
NM_001039488	Lrif1	0.086	0.118	0.354	0.242	0.381	0.463	0.256	0.315	3.706	3.292	3.519	4.352	3.159
NM_001039493	Plekhm3	-0.215	0.76	0.32	0.454	-0.747	3.075	0.11	0.164	1.755	1.914	3.283	1.863	1.39
NM_001039494	Catsperz	-1.017	0.642	0.462	NA	0.168	NA	-1.686	0.712	0.39	0.746	0.113	0.119	0.081
NM_001039495	Cfap65	-0.948	NA	-0.769	NA	-1.342	NA	1.107	NA	0	0.002	0.005	0.002	0.003
NM_001039501	Wfdc10	NA	NA	NA	NA	NA	NA	NA	NA	0	0	0	0	0
NM_001039502	Krtap1-4	NA	NA	NA	NA	NA	NA	NA	NA	0	0	0	0	0
NM_001039507	Lipe	-1.144	0.298	-0.081	0.009	-1.689	0.583	0.516	0.085	0.123	0.246	0.558	0.166	0.167
NM_001039509	Pnkd	-0.048	0.048	0.103	0.054	-0.192	0.162	-0.318	0.411	3.148	3.043	2.96	2.473	2.147
NM_001039510	Adora1	0.458	0.257	-0.923	0.309	0.999	0.818	1.135	1.235	0.568	0.395	0.633	1.22	2.174
NM_001039511	Ivns1abp	0.727	2.609	0.73	1.376	-0.075	0.055	0.209	0.295	10.935	6.238	13.886	12.389	7.012
NM_001039512	Ivns1abp	0.544	1.207	0.611	0.513	-0.516	0.507	-0.742	1.798	4.461	2.876	3.992	2.611	1.608
NM_001039514	Dhps	0.487	3.995	-0.476	0.661	-0.143	0.117	-0.523	1.429	18.337	12.284	14.463	12.489	16.287
NM_001039515	Arl4a	-0.417	0.895	0.434	0.429	-0.117	0.088	-0.201	0.2	1.775	2.214	1.722	1.511	1.046
NM_001039519	Gtf2a2	0.041	0.081	0.057	0.037	0.263	0.636	0.294	0.966	33.136	30.265	35.111	39.853	36
NM_001039520	Dnm2	-0.54	2.407	-0.387	0.286	-0.573	1.043	0.398	0.627	4.347	5.921	8.796	5.601	6.85
NM_001039521	Rrn3	0.099	0.587	-0.33	1.275	0.246	1.009	0.194	1.122	27.355	24.023	27.347	30.706	36.142
NM_001039522	Leo1	0.313	3.982	-0.023	0.013	0.326	0.719	0.179	0.364	27.259	20.645	25.442	30.388	28.75
NM_001039530	Parp14	-1.145	2.071	0.554	0.091	-0.591	0.15	-2.051	1.956	0.157	0.324	0.058	0.037	0.024
NM_001039532	Zfp784	0.15	0.242	0.585	0.423	0.01	0.006	-0.696	1.587	4.032	3.405	2.56	2.455	1.51
NM_001039533	Pdxdc1	0.112	0.084	1.084	1.146	0.639	0.469	0.805	0.834	1.664	1.446	1.961	2.889	1.268
NM_001039534	Pstk	0.333	1.167	0.06	0.024	-0.162	0.139	-0.739	2.064	11.201	8.385	7.744	6.561	5.883
NM_001039536	Pigl	0.193	0.328	0.129	0.086	0.175	0.2	0.006	0.005	5.016	4.13	4.585	4.951	4.238
NM_001039537	Lif	-1.302	0.745	-2.116	3.316	0.056	0.014	1.305	0.68	0.066	0.154	0.161	0.16	0.652
NM_001039543	Mlf1	0.701	0.105	NA	NA	NA	NA	-6.724	2.036	0.532	0.308	0	0	0.005
NM_001039544	Mup3	NA	NA	NA	NA	NA	NA	NA	NA	0	0	0	0	0
NM_001039545	Myh2	NA	NA	NA	NA	NA	NA	NA	NA	0	0	0	0	0
NM_001039546	Myo6	0.763	7.769	1.809	13.285	-0.622	3.731	0.265	0.874	12.596	6.97	24.158	14.834	3.972
NM_001039551	Cnnm3	0.566	0.707	0.015	0.005	0.796	0.651	0.155	0.111	0.875	0.557	0.574	0.96	0.88
NM_001039552	Ermard	0.227	0.335	0.584	0.519	-0.021	0.01	-1.68	10.518	3.56	2.857	1.162	1.088	0.68
NM_001039553	4930467E23Rik	-3.209	NA	2.193	NA	2.262	NA	3.762	0.563	0.005	0.035	0.014	0.056	0.012
NM_001039554	Angptl7	-1.415	3.302	0.058	0.006	-0.187	NA	-2.38	2.629	0.532	1.342	0.12	0.101	0.089
NM_001039555	Cyp2c68	NA	NA	NA	NA	NA	NA	NA	NA	0	0	0	0	0
NM_001039556	Rad54b	0.286	1.062	0.142	0.11	1.387	7.061	0.317	0.895	6.504	5.04	3.226	7.975	6.751
NM_001039557	Mroh8	0.264	0.09	-0.518	0.121	-0.38	0.097	-0.593	0.24	0.114	0.089	0.101	0.074	0.099
NM_001039558	Smco3	0.738	0.224	1.295	NA	0.482	NA	-1.421	0.542	0.182	0.102	0.048	0.067	0.025
NM_001039560	Gcnt7	1.257	0.682	-1.289	0.387	-0.43	NA	-1.788	1.077	0.214	0.083	0.085	0.061	0.138
NM_001039562	Ankrd37	0	0	0.027	0.003	0.507	NA	-4.21	15.146	4.093	3.809	0.164	0.217	0.197
NM_001039563	Spag11b	0.976	NA	1.956	NA	-0.43	NA	1.023	NA	0.007	0	0.035	0.018	0
NM_001039566	Defb30	NA	NA	-0.849	NA	NA	NA	NA	NA	0	0	0	0	0.01
NM_001039578	Evi5l	0.101	0.03	0.08	0.04	0.105	0.076	2.119	3.427	0.596	0.525	2.453	2.525	2.222
NM_001039581	Abca3	0.279	0.723	0.445	0.413	-0.489	0.795	-0.351	0.843	3.165	2.454	3.635	2.44	1.681
NM_001039586	Glyctk	-2.427	2.097	0.98	0.59	0.555	0.247	1.034	0.396	0.128	0.644	0.183	0.254	0.121
NM_001039593	Spata46	0.61	NA	-0.534	NA	1.513	NA	-0.442	0.054	0.101	0.06	0.027	0.072	0.098
NM_001039594	Lce3a	NA	NA	NA	NA	NA	NA	NA	NA	0	0	0	0	0
NM_001039595	Gm13043	NA	NA	NA	NA	NA	NA	NA	NA	0	0	0.002	0	0
NM_001039644	Edem3	-0.201	0.957	0.501	3.818	-0.257	0.699	0.51	4.174	8.427	9.128	14.883	11.781	7.776
NM_001039645	Asphd1	NA	NA	NA	NA	NA	NA	NA	NA	0	0	0.004	0	0
NM_001039646	Gbp10	-2.912	1.554	-3.665	NA	-2.661	NA	-3.467	NA	0.019	0.139	0.012	0	0.02
NM_001039647	Gbp11	-1.204	NA	1.956	NA	-0.844	NA	-0.817	NA	0.008	0.03	0.016	0.004	0
NM_001039648	Gm20767	NA	NA	NA	NA	NA	NA	NA	NA	0	0	0	0	0
NM_001039652	Oprm1	NA	NA	NA	NA	NA	NA	NA	NA	0	0	0	0	0
NM_001039653	Lhx3	0.976	NA	NA	NA	NA	NA	-0.816	NA	0.005	0.001	0	0.001	0
NM_001039655	Rasgrf1	NA	NA	NA	NA	NA	NA	NA	NA	0	0	0	0	0
NM_001039657	Tesmin	-0.089	0.029	0.669	NA	-0.561	NA	-1.904	0.776	0.207	0.205	0.079	0.054	0.028
NM_001039658	Tesmin	0.852	0.095	1.027	NA	0.024	NA	-0.011	0.001	0.041	0.021	0.044	0.041	0.017
NM_001039666	Krt40	NA	NA	-0.849	NA	NA	NA	NA	NA	0	0	0	0	0.008
NM_001039669	Iffo1	0.927	2.372	1.376	0.648	-1.227	1.976	-0.816	0.968	1.749	0.863	2.392	0.971	0.355
NM_001039676	Slc39a2	1.076	0.685	-0.126	0.025	-0.154	0.044	-0.618	0.307	0.307	0.138	0.23	0.198	0.2
NM_001039677	Slc30a2	3.214	0.893	NA	NA	NA	NA	-4.907	1.221	0.053	0.004	0	0	0.003
NM_001039678	Urad	NA	NA	NA	NA	NA	NA	NA	NA	0	0	0	0	0
NM_001039683	Eif4e1b	NA	NA	NA	NA	NA	NA	NA	NA	0	0	0	0	0
NM_001039684	Mks1	0.685	6.213	-0.089	0.082	-0.101	0.141	-0.925	8.741	7.165	4.196	4.179	3.701	3.677
NM_001039688.1	Rhox4a	NA	NA	NA	NA	-0.782	NA	NA	NA	0	0	0.007	0	0
NM_001039688	Rhox4a	NA	NA	NA	NA	NA	NA	NA	NA	0	0	0.005	0	0
NM_001039689	Rhox4c	NA	NA	NA	NA	NA	NA	NA	NA	0	0	0	0	0
NM_001039692	Arhgap12	-0.286	0.435	-0.244	0.141	-0.143	0.085	-0.352	0.355	2.889	3.314	2.601	2.2	2.458
NM_001039695	Rhox4d	NA	NA	NA	NA	NA	NA	NA	NA	0	0	0	0	0
NM_001039696	Rhox4f	NA	NA	NA	NA	NA	NA	NA	NA	0	0	0	0	0
NM_001039698	Rhox4g	NA	NA	NA	NA	NA	NA	NA	NA	0	0	0	0	0
NM_001039700	Pkd1l3	0.575	NA	-1.539	NA	-3.252	NA	-2.888	NA	0.007	0.004	0.01	0	0.002
NM_001039701	Il1rn	0.324	NA	-0.399	NA	0.518	NA	0.876	0.062	0.022	0.018	0.032	0.042	0.056
NM_001039710	Coq10b	-0.842	5.907	0.258	0.244	-0.66	1.997	0.333	0.834	4.5	7.614	9.275	5.557	4.33
NM_001039723	Tmem120b	0.5	1.422	0.714	1.428	0.049	0.068	2.247	53.825	3.653	2.426	17.222	16.983	9.712
NM_001039824	Fdx1l	0.34	0.496	-0.063	0.028	-0.026	0.019	0.092	0.078	11.25	8.385	12.646	11.808	11.513
NM_001039878	Strn4	-0.143	0.572	-0.187	0.303	-0.266	0.663	-0.118	0.317	24.172	25.04	27.603	21.869	23.322
NM_001039889	Smok3b	NA	NA	NA	NA	NA	NA	NA	NA	0	0	0	0	0.002
NM_001039934	Map2	-1.448	14.339	-0.842	0.837	0.433	0.259	-1.702	4.858	1.702	4.38	0.404	0.51	0.861
NM_001039939	Asxl1	0.263	2.803	-0.327	1.291	0.087	0.234	-0.486	5.896	20.729	16.263	14.41	14.527	17.015
NM_001039941	Cypt8	NA	NA	NA	NA	NA	NA	NA	NA	0	0	0	0	0
NM_001039942	Cypt9	NA	NA	NA	NA	NA	NA	NA	NA	0	0	0	0	0
NM_001039943	Cypt7	NA	NA	NA	NA	NA	NA	NA	NA	0	0	0	0	0
NM_001039944	Cypt10	NA	NA	NA	NA	NA	NA	NA	NA	0	0	0	0	0
NM_001039951	Zfp606	0.823	2.919	-0.092	0.035	0.141	0.077	-0.91	1.944	2.618	1.393	1.295	1.371	1.361
NM_001039959	Ahnak	-4.34	1.359	0.981	0.463	-0.773	0.881	7.463	6.963	0.012	0.183	3.013	1.679	0.784
NM_001039965	Zfp869	0.362	2.36	-0.019	0.016	0.175	0.291	-0.553	3.754	7.696	5.626	4.828	5.149	4.878
NM_001039967	Zfp869	0.363	0.736	-0.019	0.009	0.179	0.149	-0.553	1.315	1.449	1.059	0.909	0.969	0.918
NM_001040005	Rnf213	0.409	0.538	0.69	1.579	-0.454	1.774	1.105	3.249	2.03	1.424	6.172	4.275	2.487
NM_001040026	Sco1	0.452	2.311	-0.301	0.548	0.211	0.404	-0.61	2.889	5.786	3.992	3.39	3.716	4.296
NM_001040027	Defb41	NA	NA	NA	NA	NA	NA	NA	NA	0	0	0	0	0
NM_001040055	Spint5	NA	NA	NA	NA	NA	NA	NA	NA	0	0	0	0	0
NM_001040072	Nynrin	-0.543	15.177	0.209	0.261	-0.315	2.239	0.009	0.021	18.699	25.619	24.183	18.484	14.895
NM_001040085	Sytl2	3.734	NA	2.592	NA	2.659	NA	-1.092	NA	0.015	0	0.001	0.007	0
NM_001040087	Sytl2	NA	NA	NA	NA	NA	NA	NA	NA	0	0	0	0	0
NM_001040088	Sytl2	NA	NA	NA	NA	NA	NA	NA	NA	0	0.001	0	0	0
NM_001040089	Rhox3f	NA	NA	NA	NA	NA	NA	NA	NA	0	0	0	0	0
NM_001040106	Aak1	-0.375	5.661	0.176	0.228	-0.038	0.045	0.833	7.351	3.766	4.592	7.128	6.592	5.437
NM_001040111	Arap1	-1.554	11.426	-0.066	0.028	-0.425	1.586	2.253	26.348	0.94	2.609	6.201	4.4	4.331
NM_001040112	Arap1	-1.077	12.377	0.4	0.248	0.02	0.009	-1.226	3.555	2.947	5.835	1.294	1.242	0.88
NM_001040130	Tmem141	0.553	0.633	0.897	0.593	-0.38	0.229	-0.487	0.529	2.667	1.694	2.541	1.87	0.945
NM_001040131	Eif4g2	-0.408	1.159	-0.177	0.095	-0.273	0.263	0.843	2.037	6.803	8.544	15.193	11.99	12.724
NM_001040136	Pdzd9	2.504	0.356	1.606	NA	1.675	NA	-0.424	0.038	0.098	0.017	0.026	0.074	0.023
NM_001040137	Pdzd9	1.229	0.164	1.356	NA	0.645	NA	0.389	0.056	0.103	0.037	0.081	0.13	0.046
NM_001040187	Ddx17	-0.618	2.412	0.766	2.217	0.453	0.769	0.111	0.13	11.041	15.822	9.054	11.687	6.426
NM_001040395	Nadk2	-0.452	2.479	-0.094	0.033	-0.008	0.006	-0.575	3.267	3.99	5.137	2.809	2.628	2.639
NM_001040396	Selenot	-0.148	0.436	0.317	0.971	0.171	0.247	0.803	6.66	36.966	38.381	59.51	63.112	47.432
NM_001040397	Filip1l	-0.133	0.009	-1.458	NA	3.447	NA	-0.804	0.056	0.026	0.025	0	0.015	0.035
NM_001040398	Setd1b	-0.073	0.274	0.368	0.547	0.308	0.62	0.412	1.327	11.22	11.095	12.471	14.694	10.592
NM_001040399	Larp1b	0.011	0.012	-0.824	2.366	0.54	1.144	0.331	0.691	4.295	4.002	3.826	5.319	8.793
NM_001040400	Tet2	-0.152	0.455	0.719	1.348	-0.059	0.039	0.154	0.192	3.569	3.737	4.307	3.915	2.212
NM_001040403	Flot2	-0.5	5.763	0.493	0.848	0.342	1.186	0.371	2.513	9.014	11.99	9.48	11.447	7.616
NM_001040426	Thsd4	1.441	37.192	0.333	0.274	0.072	0.123	1.9	50.366	16.153	5.584	59.241	59.107	44.13
NM_001040434	Rtl9	-0.577	0.181	0.788	0.171	0.122	0.023	1.237	0.511	0.046	0.063	0.102	0.107	0.058
NM_001040435	Tacc3	-0.334	4.1	-0.236	0.534	1.112	11.737	0.119	0.372	30.457	36.115	15.892	32.462	35.764
NM_001040459	Shroom4	-0.99	12.685	-0.392	0.32	-0.389	0.534	0.102	0.116	1.922	3.591	2.786	2.02	2.476
NM_001040611	Peg10	-2.534	80.357	1.07	3.238	0.1	0.074	4.852	93.654	2.882	15.692	80.413	82.038	36.472
NM_001040631	C1qtnf5	-5.636	2.083	-1.182	NA	1.162	NA	3.006	NA	0.003	0.194	0.017	0.031	0.066
NM_001040632	C1qtnf5	-2.534	8.454	-2.523	NA	-4.21	NA	-6.837	4.26	0.492	2.622	0.073	0.001	0.023
NM_001040654	Cdkn2a	NA	NA	NA	NA	-1.61	NA	NA	NA	0	0	0.022	0	0
NM_001040669	Gm5169	NA	NA	NA	NA	NA	NA	NA	NA	0	0	0	0	0
NM_001040682	Clmn	-0.798	3.744	0.859	0.944	0.442	0.48	-0.332	0.434	0.84	1.37	0.505	0.658	0.335
NM_001040683	Med15	0.059	0.053	-0.272	0.234	0.338	0.568	0.407	0.79	3.806	3.42	4.155	4.974	5.616
NM_001040684	Hsd3b7	-0.999	0.472	0.798	0.093	-1.245	0.448	0.643	0.169	0.215	0.412	0.816	0.339	0.179
NM_001040686	Zfp692	0.547	0.858	0.205	0.13	0.928	2.156	0.145	0.181	3.949	2.545	2.383	4.299	3.478
NM_001040689	Rspo4	1.725	0.601	1.196	0.362	0.768	0.358	1.439	0.963	0.105	0.03	0.176	0.285	0.117
NM_001040690	Rap1gds1	-0.289	2.789	0.025	0.014	-0.409	1.097	-0.003	0.003	13.828	15.89	18.999	13.523	12.443
NM_001040691	Ung	0.767	6.195	-0.028	0.007	1.633	4.195	-1.602	9.323	10.461	5.769	1.162	3.376	3.191
NM_001040692	Slc6a18	-3.406	1.631	NA	NA	-0.782	NA	-3.526	NA	0.016	0.156	0.003	0.001	0
NM_001040695	Uevld	0.048	0.096	0.397	1.326	0.359	1.37	0.31	1.6	6.848	6.229	6.869	8.338	5.926
NM_001040696	Nlrp1b	0.078	0.007	-0.577	NA	1.141	NA	-2.64	NA	0.017	0.016	0	0.003	0.004
NM_001040699	Mtmr7	0.085	0.067	-0.671	0.886	0.391	0.318	0.601	1.085	0.78	0.687	0.937	1.158	1.723
NM_001040700	BC051019	0.56	0.066	-1.056	NA	-0.508	NA	-1.395	0.234	0.043	0.029	0.023	0.016	0.031
NM_001042407	Pex10	0.337	1.477	0.503	1.17	0.211	0.265	-0.56	2.692	8.515	6.331	5.124	5.674	3.73
NM_001042408	Txnl4a	0.457	0.292	-0.107	0.022	1.134	0.683	0.463	0.222	0.848	0.575	0.549	1.157	1.164
NM_001042411	P3h1	-1.189	1.505	1.184	0.563	1.207	0.883	1.417	1.341	0.441	0.951	0.535	1.169	0.472
NM_001042418	Cabyr	NA	NA	NA	NA	NA	NA	NA	NA	0.002	0	0	0	0.001
NM_001042419	Cabyr	NA	NA	NA	NA	NA	NA	NA	NA	0	0	0	0	0
NM_001042420	Cabyr	4.462	NA	1.074	NA	1.141	NA	-3.338	0.613	0.073	0	0	0.006	0.001
NM_001042421	Kntc1	-0.262	2.262	0.119	0.213	1.134	7.311	0.045	0.121	9.831	11.083	4.816	9.956	8.567
NM_001042438	Zhx1	-0.172	0.686	1.037	8.425	-0.04	0.035	-0.146	0.407	5.011	5.324	4.849	4.453	2.024
NM_001042451	Snca	-6.072	79.31	0.678	0.227	-0.774	0.688	1.409	1.49	0.378	23.527	1.766	0.983	0.579
NM_001042484	Golga7	-0.001	0.003	-0.418	0.404	0.564	4.569	0.833	14.488	35.487	33.452	44.269	61.994	77.918
NM_001042485	Tmem183a	0.611	0.48	-0.644	0.22	0.418	0.162	-0.064	0.028	0.309	0.192	0.23	0.29	0.429
NM_001042487	Dlgap4	-0.549	1.867	0.201	0.109	0.197	0.155	2.073	10.398	2.084	2.878	7.949	8.665	6.989
NM_001042488	Dlgap4	-0.307	2.061	-0.26	0.191	-0.632	1.654	-0.104	0.183	9.567	11.139	14.167	8.724	9.744
NM_001042489	Hvcn1	0.488	3.684	0.485	0.583	-0.074	0.089	1.256	18.16	7.004	4.69	18.121	16.402	11.029
NM_001042491	Anapc5	-0.116	0.624	0.087	0.06	-0.017	0.016	-1.419	23.396	43.535	44.364	17.118	15.962	14.033
NM_001042499	Rabl3	-0.418	1.382	-0.231	0.326	0.135	0.18	-0.159	0.242	4.796	6.042	4.052	4.217	4.628
NM_001042501	Fam133b	-0.017	0.038	-0.069	0.098	0.423	2.209	-0.124	0.441	20.08	19.141	14.246	18.086	17.723
NM_001042502	Pitx2	0.306	NA	1.089	NA	0.328	NA	-1.396	NA	0.029	0.018	0.007	0.011	0.004
NM_001042503	Trim71	1.507	8.198	-0.551	1.42	-0.117	0.119	0.334	0.699	1.104	0.365	1.568	1.366	1.878
NM_001042504	Pitx2	3.227	0.814	1.947	NA	0.95	NA	-0.115	0.024	0.095	0.009	0.052	0.087	0.021
NM_001042513	Txnrd1	-0.632	10.9	-0.364	0.544	0.06	0.08	2.068	43.455	23.447	34.154	97.668	96.397	116.598
NM_001042514	Txnrd1	1.151	27.784	-0.328	0.304	0.613	1.531	-1.319	13.71	15.041	6.37	4.078	5.926	6.906
NM_001042523	Txnrd1	0.618	0.316	0.051	0.012	1.306	1.73	3.898	12.191	0.377	0.227	2.327	5.506	4.949
NM_001042527	Blm	0.214	1.379	-0.299	0.406	1.272	9.128	0.861	8.645	14.322	11.637	11.207	25.57	29.419
NM_001042528	Cacna1b	-1.677	0.895	-0.7	0.503	-1.453	2.099	2.174	1.398	0.035	0.107	0.458	0.158	0.237
NM_001042534	Capg	-1.829	0.72	1.059	0.353	-0.664	0.293	2.346	1.112	0.159	0.509	1.279	0.771	0.348
NM_001042541	Akap1	0.61	11.606	-0.043	0.023	0.017	0.012	-0.547	1.798	15.036	9.25	10.503	10.07	9.752
NM_001042542	Akap4	NA	NA	1.074	NA	1.141	NA	1.107	NA	0	0	0	0.004	0.002
NM_001042556	Rpf2	0.09	0.048	-0.994	1.058	-0.682	0.686	-0.315	0.235	0.931	0.819	1.247	0.738	1.362
NM_001042557	Map2k7	-0.724	NA	2.981	NA	0.223	NA	0.08	NA	0.019	0.037	0.022	0.02	0.002
NM_001042558	Apaf1	-0.489	3.547	-0.276	0.301	-0.304	0.47	-0.13	0.187	6.02	7.908	7.034	5.387	6.123
NM_001042564	Cd27	0.148	0.017	0.979	NA	-1.028	NA	-0.685	0.114	0.082	0.066	0.104	0.049	0.024
[truncated: 40,552 more rows]

## Sheet: 1-1 NPC-NFC up
TranscriptID	GeneSymbol	log2Fc.1	nlog10P.1	log2Fc.2	nlog10P.2	log2Fc.3	nlog10P.3	log2Fc.4	nlog10P.4	meanTPM.NPC	meanTPM.NFC	meanTPM.NPC_0uM	meanTPM.NPC_1.25uM	meanTPM.NPC_5uM
NM_028716	Phf19	2.314	162.141	2.122	11.628	1.318	13.945	-1.389	27.983	26.418	4.983	4.188	9.899	2.141
NM_011859	Osr1	3.388	129.531	2.284	12.705	0.218	0.396	-0.3	0.894	21.889	1.959	15.794	17.466	3.339
NM_001077596	Shroom3	2.712	128.551	-1.014	2.905	0.259	0.383	-0.655	3.68	24.849	3.547	13.596	15.464	29.14
NM_028472	Bmper	1.86	113.393	2.018	0.996	-0.96	7.29	1.33	21.346	17.418	4.516	88.363	42.94	9.771
NM_001199153	Sncaip	3.311	104.767	1.262	2.011	0.807	4.502	-0.784	7.133	22.271	2.107	7.673	12.706	4.902
NM_001199151	Sncaip	3.585	104.53	0.799	0.788	0.883	2.315	-1.536	14.373	7.613	0.594	1.481	2.582	1.373
NM_144783	Wt1	1.639	101.91	2.046	13.751	0.661	2.799	-0.78	5.015	97.319	29.292	36.959	55.761	12.576
NM_021509	Moxd1	2.86	96.561	0.404	0.267	0.359	0.55	-2.674	69.455	22.808	2.934	2.884	3.515	2.493
NM_001347345	Foxp1	2.45	96.499	1.283	4.26	-0.391	1.644	-0.315	1.383	8.056	1.385	8.782	6.359	2.45
NM_001161665	Kif26b	2.56	94.106	1.357	37.276	-0.105	0.318	0.48	3.09	44.684	7.107	69.194	61.156	22.319
NM_172710	Sel1l3	2.545	87.127	0.109	0.101	1.271	8.519	1.887	64.088	26.212	4.199	41.853	95.063	82.699
NR_033446	Slx1b	3.846	85.721	-0.419	0.23	0.996	1.588	1.294	4.005	60.638	3.912	77.639	146.166	182.159
NR_033764	A730017C20Rik	3.606	85.314	-1.55	8.835	1.589	8.75	-1.052	12.766	14.5	1.112	2.388	6.856	18.702
NM_008216	Has2	2.637	80.045	2.636	5.49	-0.678	4.38	0.617	5.088	36.492	5.487	92.861	54.862	8.327
NM_001310459	Eya1	3.902	79.111	2.351	10.15	0.414	0.797	-0.603	1.773	34.002	2.106	17.327	21.992	4.033
NM_001159662	Ppp1r16b	2.222	76.068	-2.164	2.498	0.698	0.73	-4.043	107.703	10.599	2.137	0.404	0.63	2.669
NM_001164792	Tpbg	2.059	75.148	0.503	1.073	0.252	0.687	0.705	6.05	20.29	4.582	28.743	32.407	21.339
NM_030021	Cutal	3.558	74.311	2.17	8.251	0.301	0.889	1.273	30.363	13.02	1.029	26.271	30.87	6.463
NM_198895	Abr	1.675	73.337	-0.622	1.463	-0.176	0.373	0.159	0.455	20.635	6.059	26.942	22.578	32.659
NM_026408	Sncaip	3.344	69.303	2.19	6.63	0.037	0.03	0.049	0.067	8.881	0.815	9.324	9.048	1.833
NM_029420	Slx1b	2.773	68.259	-0.383	0.233	0.873	1.902	1.236	4.601	34.337	4.705	45.818	79.474	96.634
NM_011299	Rps6ka2	2.115	66.983	1.098	5.074	0	0	0.635	2.851	23.897	5.174	38.305	36.334	15.944
NM_001277875	Tpm2	3.342	66.731	0.046	0.021	0.827	4.108	-0.562	3.121	45.247	4.176	17.792	30.161	27.355
NM_008455	Klkb1	3.89	66.462	-0.296	0.097	1.117	1.762	1.053	2.206	8.266	0.52	8.229	16.843	19.321
NM_010791	Meox1	2.705	65.897	5.181	20.359	-1.791	12.144	-3.867	75.938	35.216	5.048	8.623	2.364	0.063
NM_001099299	Ajap1	3.227	64.907	1.004	0.615	-1.102	8.928	-0.872	5.64	9.542	0.955	11.57	5.132	2.351
NM_146095	Rorb	3.6	63.444	-0.562	0.412	1.171	2.253	2.903	17.582	7.925	0.607	27.336	58.246	79.7
NM_177780	Dock5	3.122	62.347	0.869	7.304	-0.453	2.605	-1.387	20.279	28.284	3.02	15.298	10.623	5.427
NM_198894	Abr	3.369	61.407	0.721	4.699	0.36	1.355	0.537	2.366	12.482	1.124	14.544	17.769	10.053
NM_009741	Bcl2	1.648	60.763	2.469	44.512	0.555	2.271	-0.089	0.207	24.697	7.391	16.361	22.772	3.852
NM_010197	Fgf1	3.225	60.136	6.944	52.93	-0.558	1.593	2.334	28.648	12.549	1.249	96.146	62.211	0.473
NM_001199154	Sncaip	2.924	59.181	1.791	6.698	0.407	0.774	0.675	2.212	18.69	2.3	23.222	29.355	7.859
NM_001289921	Rorb	3.603	59.159	-0.564	0.412	1.17	2.239	2.903	17.417	5.862	0.449	20.229	43.066	58.997
NM_016669	Crym	3.905	58.966	1.74	1.945	-0.763	0.358	-1.171	1.132	87.302	5.466	67.46	37.925	10.79
NM_018761	Ctnnal1	1.811	58.964	-0.265	0.378	-0.125	0.252	-0.284	1.35	18.294	4.883	16.962	14.732	16.622
NM_145463	Shisa2	2.895	58.333	-1.201	2.245	1.485	7.841	-1.812	16.322	42.382	5.305	4.458	11.797	25.616
NM_008593	Foxd2	1.716	57.716	1.725	9.925	-0.606	1.75	-1.199	8.274	23.92	6.852	16.439	10.204	2.903
NM_025833	Baiap2l1	2.098	57.539	-0.734	1.284	0.704	5.504	1.037	13.563	10.569	2.312	13.76	21.325	33.252
NM_008812	Padi2	2.697	55.903	-2.04	2.492	0.74	2.215	-2.923	91.18	11.024	1.588	0.898	1.427	5.543
NM_175407	Sobp	2.566	55.724	1.482	4.98	-0.096	0.11	1.268	10.058	10.933	1.722	29.067	25.899	8.675
NM_028709	Btbd11	3.156	54.744	1.941	15.248	0.606	1.641	-1.816	20.503	21.151	2.209	4.08	5.882	1.443
NM_175549	Robo2	1.786	54.478	1.982	6.649	-0.737	2.871	-0.132	0.233	19.971	5.424	31.53	17.834	4.203
NM_001017427	Rasef	2.921	54.172	0.277	0.076	0.228	0.216	-2.69	52.51	15.353	1.887	2.117	2.333	1.818
NM_138683	Rspo1	3.442	52.327	1.494	1.613	-0.193	0.241	-0.42	1.454	39.072	3.337	34.222	28.732	9.594
NM_008270	Hoxb9	1.921	51.615	0.044	0.038	-0.104	0.257	0.555	4.777	41.609	10.286	67.958	59.961	54.258
NM_011037	Pax2	2.482	51.061	-1.264	2.801	1.525	9.06	-0.122	0.165	110.617	18.446	36.473	100.181	224.937
NM_028943	Sgms2	2.171	50.263	-0.507	0.079	1.865	10.71	2.046	36.037	7.371	1.532	8.683	29.811	40.125
NM_008827	Pgf	3.132	50.006	1.26	1.138	-0.869	0.759	-0.251	0.158	9.49	1.009	14.987	7.758	3.054
NM_021050	Cftr	3.456	49.811	3.36	22.528	-0.818	5.371	1.765	24.934	8.077	0.683	50.094	26.933	2.46
NM_001083810	Prr5l	2.05	49.036	0.615	1.178	0.699	1.241	-0.435	1.343	9.536	2.16	4.467	6.902	4.239
NM_001358494	Robo2	2.121	47.722	2.448	19	-0.428	1.174	0.461	1.395	36.526	7.844	69.837	49.321	8.4
NM_008278	Hpgd	2.209	47.695	4.472	37.683	-1.975	13.553	0.895	6.457	13.653	2.768	103.727	24.942	1.059
NM_007603	Capn6	2.265	47.519	0.026	0.009	0.757	7.365	-0.052	0.097	222.567	43.149	131.316	210.834	194.528
NM_001085385	1600014C10Rik	3.126	47.492	1.867	2.915	-2.554	5.052	-2.782	27.497	6.322	0.682	5.464	0.897	0.232
NM_001039048	Trim63	3.934	47.061	0.103	0.06	-0.82	3.959	-0.68	2.873	7.768	0.471	8.842	4.745	4.157
NM_019389	Vcan	2.087	46.897	0.55	2.193	0.507	2.328	0.75	4.499	102.292	22.497	125.53	168.7	107.784
NM_013871	Mapk12	2.046	46.862	0.405	0.136	-0.833	5.045	0.383	1.329	11.916	2.708	28.672	15.228	10.894
NM_026125	C1qtnf12	2.253	46.14	-2.082	3.355	0.391	0.34	-0.428	0.558	52.01	10.222	30.382	37.771	149.231
NM_001128151	Cecr2	2.199	45.892	-3.701	31.562	1.604	5.068	-2.231	32.715	8.32	1.689	0.605	1.737	21.21
NM_001114174	Fam189a2	2.68	45.559	1.194	2.602	-0.942	2.772	-1.628	12.462	13.908	2.022	8.922	4.4	1.814
NM_010725	Lmx1b	3.974	45.368	-0.402	0.273	0.422	0.679	-0.606	2.325	7.532	0.449	3.792	4.861	6.035
NM_007731	Col13a1	2.606	45.24	2.35	13.228	-0.577	0.911	-0.477	0.984	6.41	0.991	7.109	4.518	0.824
NM_009421	Traf1	3.596	45.159	2.751	1.749	0.793	0.466	-2.722	8.234	5.717	0.437	0.52	0.844	0.121
NM_001029978	Tceal3	3.293	45.156	1.451	2.412	0.256	0.235	0.489	0.894	9.614	0.932	11.597	13.289	4.532
NM_146137	Amigo1	1.95	43.103	1.567	5.522	0.383	1.014	-0.294	1.215	5.852	1.417	3.774	4.681	1.489
NM_013456	Actn3	3.054	42.189	0.909	1.397	-0.317	0.572	-1.822	16.57	16.484	1.847	6	4.581	2.26
NM_021391	Ppp1r1a	3.18	42.154	0.639	1.28	-0.114	0.08	-1.438	12.706	11.711	1.202	4.794	4.257	2.552
NM_022004	Fxyd6	1.668	41.89	0.755	5.818	-0.174	0.328	-0.551	4.334	131.149	38.619	103.964	87.778	48.682
NM_001111016	Nav2	1.707	41.881	-0.368	0.193	0.718	3.405	-0.078	0.149	14.057	4.026	8.363	13.081	15.865
NM_001276764	Dst	2.371	41.202	0.79	1.47	-0.272	0.726	-0.164	0.261	12.558	2.267	13.975	10.983	5.95
NM_026681	Ccdc88c	1.814	41.167	-1.984	38.087	1.744	36.217	-0.014	0.025	8.575	2.282	2.613	8.339	30.825
NM_138313	Bmf	2.516	41.024	-1.815	2.16	-1.261	4.09	-2.718	30.239	13.483	2.201	5.056	2.002	6.538
NM_008002	Fgf10	1.93	40.746	-0.5	0.139	0.729	1.693	-2.483	42.668	7.135	1.76	0.798	1.248	1.672
NM_008516	Lrrn1	2.966	39.567	1.531	4.706	0.984	2.043	1.172	5.77	14.94	1.78	17.634	33.039	10.717
NM_001347372	Eya4	2.081	39.035	1.77	5.313	0.117	0.114	0.179	0.276	20.219	4.476	21.882	22.444	6.169
NM_001355153	Plcb4	2.091	38.919	1.474	8.519	0.232	0.37	0.888	4.228	7.942	1.747	12.927	14.427	4.85
NM_001177352	Myc	1.688	38.827	0.156	0.061	0.469	0.708	-2.241	33.372	17.669	5.182	2.78	3.685	3.059
NM_010849	Myc	1.688	38.827	0.156	0.061	0.469	0.708	-2.241	33.372	17.669	5.182	2.78	3.685	3.059
NM_008584	Meox2	3.205	38.67	4.729	15.148	-0.269	0.483	0.805	4.633	18.027	1.818	39.251	30.976	1.1
NM_001277985	Snap91	3.381	37.897	2.206	33.193	-0.286	0.707	0.413	0.76	21.654	1.938	36.374	28.181	5.71
NM_008984	Ptprm	1.941	37.415	0.929	2.78	-0.24	0.622	0.26	0.586	16.019	3.907	23.394	18.837	9.255
NM_001012402	Hs3st6	3.713	37.226	-0.576	0.73	0.098	0.054	-2.809	34.495	20.663	1.456	2.854	2.896	4.048
NM_010923	Nnat	1.831	37.029	-0.436	0.494	0.177	0.198	-1.022	9.41	104.083	27.568	46.763	50.404	63.371
NM_152813	Plcd3	1.896	37.029	-1.769	5.26	-0.044	0.022	-0.735	1.38	7.989	2.02	5.095	4.682	15.07
NM_010167	Eya4	3.403	35.925	1.407	4.642	0.206	0.223	-0.464	2.522	9.709	0.874	6.362	6.912	2.442
NM_024195	Cyb5r4	1.865	35.683	0.42	1.549	0.287	1.043	-0.097	0.18	24.096	6.192	19.082	22.052	15.442
NM_001033481	Myrf	1.885	35.285	1.615	8.3	-0.744	3.347	-1.284	12.698	5.686	1.449	4.041	2.299	0.702
NM_001277149	Chd7	1.995	34.584	-0.613	1.716	0.378	0.751	0.082	0.122	7.03	1.643	5.939	7.319	10.436
NM_001267626	Dpf3	2.585	34.58	2.681	4.087	-0.487	0.581	-1.786	10.37	7.574	1.199	3.178	2.169	0.311
NM_027464	Fam213a	1.751	34.382	-0.167	0.075	0.086	0.086	-0.315	0.804	27.081	7.549	21.124	21.384	22.533
NM_001111063	Comt	4.276	34.14	-0.299	0.122	1.276	2.335	2.526	11.305	791.432	37.798	1952.81	4479.52	5126.2
NM_001276489	Ism1	3.325	34.131	-3.107	84.336	0.642	2.294	-2.254	64.46	19.814	1.826	2.751	4.075	32.749
NM_008591	Met	2.127	34.08	0.135	0.055	0.622	3.377	-1.424	15.009	18.732	4.003	4.704	6.844	5.867
NM_001252401	Tle2	1.891	33.955	0.95	3.926	0.067	0.069	1.067	6.084	11.91	3.022	24.625	24.539	11.852
NM_001012451	Ankrd6	2.547	33.568	1.197	8.458	0.134	0.227	-0.128	0.267	17.916	2.851	15.434	16.1	6.571
NM_178929	Kazald1	3.784	33.566	3.699	38.949	-1.233	6.148	1.027	4.423	7.877	0.533	38.765	15.769	1.128
NM_026433	Tmem100	3.467	33.334	3.03	16.243	0.345	0.313	0.944	3.207	17.636	1.472	27.432	33.266	3.815
NM_007873	Doc2b	1.6	33.045	0.019	0.007	-0.511	1.586	-1.778	36.123	5.217	1.612	2.234	1.493	1.387
NM_001205234	Nrxn2	2.829	32.833	1.035	9.649	-0.374	1.557	0.683	3.634	5.039	0.658	10.822	7.929	3.626
NM_026239	Tmem35a	1.853	32.831	0.637	0.937	0.67	3.958	0.753	9.067	10.024	2.597	10.931	16.579	10.029
NM_001253695	Zfp219	2.438	32.71	-0.462	0.459	-0.388	0.474	-0.535	1.055	23.732	4.094	22.139	16.032	20.796
NM_001167983	Sipa1l1	1.764	32.531	0.973	10.704	-0.138	0.287	-0.06	0.111	6.536	1.801	7.147	6.151	2.925
NM_001081249	Vcan	1.906	32.16	1.066	3.626	0.646	1.783	1.578	9.889	56.493	14.128	111.466	165.362	73.668
NM_009416	Tpm2	2.432	32.065	0.449	0.214	1.624	6.006	0.072	0.054	23.047	3.992	8.129	23.81	16.304
NM_001110513	Ebf4	2.179	31.784	0.431	1.023	-0.379	1.16	-0.223	0.456	10.112	2.088	11.641	8.522	5.901
NM_001289546	Amph	3.442	31.446	0.664	1.083	0.62	3.704	-0.36	1.053	9.619	0.83	5.025	7.355	4.355
NM_013867	Bcar3	2.23	31.423	0.584	0.479	-0.353	1.19	1.765	33.15	6.582	1.323	29.409	21.971	13.798
NM_001198791	Ak1	1.957	31.339	0.668	0.326	-1.296	1.938	-1.824	4.701	9.652	2.322	6.935	2.649	1.575
NM_010279	Gfra1	2.24	31.337	-0.614	0.318	0.098	0.059	-2.43	24.249	15.679	3.148	2.822	2.841	4.121
NM_008274	Hoxd12	3.206	30.919	0.123	0.067	0.332	0.924	-0.289	0.911	9.418	0.944	6.307	7.574	6.522
NM_001081557	Camta1	2.352	30.296	-0.878	2.547	0.367	0.736	-0.06	0.088	7.207	1.31	5.561	6.791	11.68
NM_001202445	Mapk8ip1	1.83	29.898	0.316	0.156	-0.917	1.349	-1.626	5.545	24.622	6.486	15.509	7.79	5.914
NM_001005748	Phactr1	3.424	29.713	0.944	0.561	-0.779	0.578	-3.996	46.554	5.404	0.468	0.6	0.329	0.164
NM_021883	Tmod1	2.962	29.674	1.39	1.316	-1.004	2.287	-3.15	27.151	5.66	0.681	1.32	0.627	0.224
NM_001177628	Slc45a3	2.973	29.628	0.074	0.018	1.24	2.631	-0.021	0.015	10.682	1.26	4.599	10.276	9.276
NM_001306148	Car12	3.187	29.357	1.327	2.896	-0.463	1.023	-1.3	10.774	13.288	1.348	7.64	5.294	1.988
NM_009523	Wnt4	1.962	29.21	-5.873	42.179	2.317	7.079	-3.224	30.557	27.268	6.533	0.604	2.853	155.904
NM_001033248	Gm266	1.892	29.172	0.222	0.142	0.356	0.632	-0.163	0.36	44.298	11.149	31.799	38.819	31.312
NM_207105	H2-Ab1	3.497	29.004	-0.029	0.009	-0.166	0.084	-3.141	37.275	9.227	0.755	1.21	1.025	0.981
NM_134437	Il17rd	2.143	28.287	-0.573	0.668	-0.003	0.003	-0.065	0.119	20.994	4.415	20.839	19.661	27.526
NM_001291186	Abr	2.772	28.213	0.744	0.652	0.891	2.058	-0.31	0.476	7.204	1.001	3.246	5.732	3.206
NM_020293	Cldn9	3.251	27.965	-0.7	0.646	0.07	0.041	-2.287	14.06	31.401	3.051	6.324	6.287	9.661
NM_008301	Hspa2	1.943	27.939	0.514	0.716	-0.078	0.079	-0.133	0.253	5.727	1.397	5.69	5.135	3.375
NM_001271580	4930426D05Rik	3.382	27.657	-0.116	0.037	1.242	2.525	-1.762	8.645	7.752	0.698	0.997	2.233	2.291
NM_001037906	Nell1	2.961	27.381	2.246	1.05	-0.764	2.353	0.78	2.3	16.061	1.912	48.236	26.946	5.399
NM_138595	Gldc	2.347	27.38	-1.051	4.845	0.255	0.824	0.659	6.811	16.385	2.992	22.383	25.366	49.351
NM_021889	Syt9	1.79	27.272	1.284	1.845	1.208	3.259	1.458	21.099	5.136	1.391	6.322	13.836	5.359
NM_198604	Plekhg6	2.855	26.51	-1.798	6.35	0.676	1.202	-0.83	4.667	7.135	0.914	2.586	3.935	12.885
NM_153112	Cadm4	1.654	26.398	-0.556	1.169	-0.326	0.685	-0.427	2.204	16.974	5.041	16.264	12.371	17.096
NM_009911	Cxcr4	1.725	26.301	-1.135	0.957	0.946	5.064	1.166	10.18	21.454	6.056	25.888	47.139	97.942
NM_001136062	Eno3	2.698	26.21	0.65	0.749	-0.893	2.132	-1.543	7.282	18.471	2.645	12.164	6.193	3.708
NM_024449	Sost	3.287	25.966	-1.174	0.286	0.459	0.181	-4.694	39.167	11.181	1.063	0.327	0.419	0.901
NM_001316735	Fam213a	2.485	25.865	-0.326	0.154	-0.088	0.074	-1.298	6.313	18.056	3.013	8.066	7.19	8.484
NM_008289	Hsd11b2	1.984	25.639	-0.224	0.155	0.674	3.927	-0.605	4.248	20.179	4.774	8.572	13.035	14.289
NM_145502	Erlin1	2.42	25.572	0.158	0.113	0.774	0.47	-1.934	29.995	7.205	1.255	1.117	1.847	1.545
NM_001080814	Fat3	2.167	25.486	3.141	28.549	-0.361	0.807	-0.263	0.406	8.392	1.751	9.303	6.85	0.727
NM_001145959	Ndrg2	2.107	24.887	1.181	7.7	0.042	0.046	1.837	22.086	12.557	2.737	44.793	44.013	18.193
NM_001004177	Celsr2	1.889	24.864	0.136	0.086	-0.704	2.663	0.095	0.145	5.928	1.498	10.644	6.198	5.309
NM_001081403	Klhl14	2.285	24.409	-0.629	0.368	1.27	2.487	-0.844	3.153	8.783	1.676	2.105	4.798	6.994
NM_001004154	Rragb	2.601	24.304	-0.514	0.579	1.029	3.065	-0.546	1.874	6.094	0.934	2.132	4.088	5.496
NM_001285457	Gfra1	2.035	24.292	0.013	0.003	0.179	0.206	-1.638	17.345	22.46	5.1	6.628	7.069	6.615
NM_001042592	Arrdc4	1.588	24.107	-0.031	0.013	1.009	2.397	-3.565	79.759	16.14	5.072	0.703	1.335	1.279
NM_175543	Rab11fip4	1.587	23.62	-1.825	11.701	0.012	0.007	-2.321	29.929	5.714	1.786	1.179	1.118	3.721
NM_010692	Lbx2	3.551	23.489	0.763	0.978	0.36	0.349	-0.44	0.73	6.465	0.516	3.829	4.662	2.589
NM_011976	Sema4g	1.926	23.424	0.799	3.62	-0.612	2.923	-1.989	18.46	21.682	5.337	8.594	5.363	2.878
NM_001163640	Chn2	1.805	23.294	1.825	12.477	-0.044	0.046	0.473	1.626	5.684	1.523	8.38	7.758	2.047
NR_015462	Wt1os	1.746	22.988	1.989	3.032	0.723	1.485	-1.868	20.236	5.131	1.433	0.878	1.383	0.325
NM_001164035	Ntf3	1.987	22.827	-0.453	0.646	1.554	5.224	-1.253	9.189	8.698	2.056	1.297	3.575	4.576
NM_001358492	Robo2	1.687	22.768	2.783	15.029	-0.046	0.029	1.154	4.347	11.432	3.311	27.236	24.993	3.364
NM_133764	Atp6v0e2	2.13	22.172	0.178	0.047	-0.552	0.644	-1.306	6.239	9.299	1.981	5.737	3.683	3.08
NM_008808	Pdgfa	1.838	22.031	-2.272	31.068	-0.581	2.296	-1.784	35.534	24.088	6.277	10.796	6.855	30.933
NM_001001981	Utp14b	1.586	21.94	-0.289	0.485	0.124	0.202	-0.595	2.809	11.444	3.597	7.155	7.438	8.457
NM_019971	Pdgfc	1.924	21.902	0.082	0.05	0.237	0.584	-0.636	3.804	42.721	10.476	24.129	26.977	23.708
NM_001160366	Ssc4d	2.607	21.874	0.017	0.007	-0.806	2.29	-0.571	1.292	5.457	0.834	6.613	3.59	3.321
NM_010423	Hey1	1.589	21.48	-0.121	0.045	0.175	0.044	-0.402	0.417	26.397	8.208	18.313	19.548	19.956
NM_001357435	St3gal6	1.625	21.439	-0.26	0.079	0.71	1.82	0.219	0.488	10.781	3.273	7.949	12.304	13.924
NM_052994	Spock2	3.744	21.286	0.553	0.547	0.228	0.551	-1.786	31.443	176.258	12.163	44.865	50.181	32.097
NM_011380	Six2	4.094	21.262	2.764	12.106	0.311	0.681	0.598	2.829	197.195	10.67	248.343	293.676	40.448
NM_145508	Dyrk3	1.614	21.239	-0.313	0.264	0.28	0.617	0.851	7.445	6.952	2.127	10.651	12.309	14.363
NM_011569	Tekt1	2.963	20.736	-1.112	1.456	1.481	2.909	-1.799	12.095	6.393	0.758	0.677	1.806	3.669
NM_001313757	Acvr2b	1.761	20.62	-1.074	3.522	0.212	0.217	-1.743	24.491	5.199	1.43	1.395	1.521	3.011
NM_175503	Aard	2.941	20.548	1.623	1.097	0.654	0.315	-3.207	21.306	5.149	0.623	0.368	0.543	0.166
NM_009867	Cdh4	1.952	20.445	-2.552	30.895	0.8	1.871	-0.362	1.72	15.151	3.637	6.988	11.572	63.254
NM_173016	Vat1l	3.141	20.11	-0.965	0.992	0.991	4.126	0.342	1.848	7.392	0.771	4.853	9.193	16.919
NM_001198565	Sulf1	2.162	19.941	1.781	2.958	-0.809	1.186	-3.465	54.423	7.77	1.648	1.266	0.695	0.188
NM_007584	Ddr1	2.248	19.645	-0.032	0.01	-1.246	2.606	-1.463	4.29	6.858	1.356	6.093	2.43	2.349
NM_007709	Cited1	3.763	19.379	4.397	36.826	-1.152	4.661	0.394	0.852	9.306	0.631	27.888	11.968	0.529
NM_001025246	Trp53i11	1.79	19.181	-0.772	1.415	-0.009	0.005	-1.339	5.261	18.004	4.907	7.394	6.964	11.198
NM_173870	Mgat4a	1.79	18.912	-0.236	0.261	0.228	0.362	-1.266	8.332	6.882	1.858	2.535	2.799	3.095
NR_073086	Hoxd11	1.972	18.575	1.7	2.884	0.866	0.986	0.832	1.105	11.754	2.819	11.859	20.562	5.871
NM_145155	Wasf3	1.691	18.293	-0.839	2.362	0.53	0.91	-0.591	1.579	5.498	1.593	2.622	3.593	5.983
NM_010164	Eya1	4.228	17.617	2.53	11.549	0.554	1.295	0.126	0.209	25.681	1.261	19.824	27.573	4.458
NM_001364994	Tshz1	1.684	16.953	0.942	1.426	0.411	0.795	-0.085	0.091	9.029	2.642	6.614	8.34	4.067
NM_008791	Pcp4	2.34	16.631	3.302	2.163	0.626	1.266	4.174	71.334	17.798	3.304	214.061	316.696	30.223
NM_133833	Dst	2.849	16.506	0.306	0.295	-0.056	0.06	-0.473	1.155	15.741	2.028	12.192	11.135	8.426
NM_001304757	Col13a1	2.769	16.397	2.011	3.44	-0.458	0.287	-1.244	2.663	6.133	0.849	3.661	2.533	0.59
NR_131758	Hoxb5os	2.077	16.205	-0.297	0.22	-0.155	0.131	0.632	1.631	15.84	3.504	28.077	23.995	27.803
NM_001163143	C2cd4a	3.541	16.12	-0.668	0.558	0.241	0.131	-1.715	4.059	8.065	0.636	2.144	2.396	3.581
NM_001357746	Pdgfc	1.942	15.873	-0.171	0.07	0.525	1.317	-1.608	37.995	15.794	3.818	3.698	5.082	5.296
NM_031163	Col2a1	3.421	15.512	1.759	20.121	-1.442	9.307	0.456	1.8	44.853	3.875	172.962	60.349	16.707
NM_173759	A730017C20Rik	2.807	14.974	-1.368	1.539	2.242	0.941	-1.723	3.513	5.692	0.745	0.39	1.706	4.088
NM_017392	Celsr2	1.754	14.241	0.56	1.001	0.126	0.156	0.555	1.726	5.922	1.634	8.255	8.561	5.425
NM_001198831	Ddr1	1.823	14.231	-0.433	0.856	-0.122	0.291	0.875	7.52	8.284	2.227	17.054	14.932	18.763
NM_001360339	Fam107a	3.53	13.912	0.76	0.781	0.705	1.131	-3.694	86.745	19.731	1.572	0.965	1.504	0.826
NM_001252192	Eya1	4.282	13.605	2.058	5.958	0.529	1.082	-0.583	3.196	11.599	0.549	5.59	7.611	1.715
NM_001085500	Cisd3	2.025	13.574	0.204	0.08	-0.425	0.623	-0.851	2.391	11.274	2.6	8.671	6.105	5.014
NM_030082	Hist3h2ba	1.955	13.28	-0.554	0.561	-0.689	0.916	-1.665	10.159	49.326	11.84	25.619	15.232	20.882
NM_013749	Tnfrsf12a	1.703	13.247	-1.433	6.306	-1.14	3.073	-0.073	0.068	11.106	3.182	23.862	10.318	26.168
NM_001316739	Fam213a	2.682	12.938	1.553	0.473	2.531	1.814	-2.056	4.271	5.47	0.787	0.227	1.308	0.418
NM_013702	Uncx	2.832	12.422	-0.581	0.128	0.05	0.048	0.134	0.284	110.675	14.409	120.868	119.229	168.865
NM_033037	Cdo1	1.706	11.954	3.746	26.359	-0.811	3.707	-0.408	1.435	11.12	3.234	15.167	8.243	0.566
NM_010090	Dusp2	1.651	11.652	-2.237	10.113	-0.831	1.405	-1.229	3.949	13.045	3.873	10.185	5.438	24.155
NM_010458	Hoxb3	1.653	11.577	0.299	0.284	0.281	0.47	-0.571	1.18	19.242	5.747	11.04	12.661	9.649
NM_026257	Ubxn11	1.695	11.372	0.31	0.134	0.168	0.091	-2.032	11.725	5.426	1.568	1.212	1.298	0.984
NM_172962	Ddr1	1.956	11.365	-0.066	0.074	0.044	0.064	0.36	1.549	7.576	1.817	9.719	9.53	9.325
NM_001357713	Tdrkh	2.011	11.135	-0.124	0.037	-0.424	0.48	-1.488	7.611	5.73	1.322	2.823	2.008	2.06
NM_033039	Ocm	3.777	11.129	-0.769	NA	-0.751	NA	-8.962	10.478	7.707	0.513	0.028	0.012	0.024
NM_001111050	Cd151	2.03	10.949	0.261	0.173	0.429	0.504	2.28	18.408	7.388	1.677	27.281	35.388	27.485
NM_001356536	Trp53i11	1.633	10.849	-1.371	3.854	0.008	0.005	-1.688	18.884	7.743	2.317	2.48	2.361	5.719
NM_001317722	Col11a2	3.477	10.266	0.51	0.318	-0.661	0.961	-4.283	31.183	9.146	0.764	0.76	0.46	0.304
NM_001037247	Defb36	4.446	9.929	1.08	0.456	-0.076	0.052	1.48	3.473	5.686	0.237	17.324	15.583	6.952
NM_009926	Col11a2	3.658	9.593	-0.945	0.388	-1.925	2.706	-5.819	66.393	8.309	0.606	0.576	0.143	0.256
NM_175007	Amph	3.59	9.46	0.244	0.11	0.49	1.76	-0.64	5.299	12.422	0.947	5.863	7.84	6.23
NM_013659	Sema4b	1.716	9.434	-0.118	0.061	-0.273	0.318	0.483	0.987	6.588	1.858	11.543	9.01	9.211
NM_001276466	Cited1	3.87	9.293	6.443	39.765	-1.477	9.813	-0.044	0.062	181.911	11.426	503.198	173.593	1.876
NM_080726	Rem2	1.671	9.064	-0.912	6.004	0.36	1.041	0.458	1.581	6.152	1.795	6.78	8.283	14.608
NM_001177353	Myc	1.801	8.995	0.079	0.023	0.311	0.15	-2.529	12.284	6.864	1.841	0.999	1.167	1.029
NM_001177354	Myc	1.801	8.995	0.079	0.023	0.311	0.15	-2.529	12.284	6.864	1.841	0.999	1.167	1.029
NM_009291	Stra6	2.674	8.901	-1.422	0.591	-0.87	1.888	-3.151	59.152	6.671	0.957	1.421	0.731	1.809
NM_010378	H2-Aa	2.82	8.612	1.163	0.226	0.366	0.08	-4.859	32.573	7.518	0.976	0.209	0.25	0.106
NR_037977	Gm53	1.71	8.249	-0.361	0.573	-0.101	0.096	0.18	0.259	10.995	3.193	13.742	12.236	14.654
NM_054048	Rcor2	2.028	8.139	0.214	0.066	1.206	1.427	0.776	1.093	7.187	1.683	5.59	12.142	9.746
NR_037958	1300002E11Rik	1.711	7.793	1.858	2.741	0.636	0.672	0.263	0.227	7.263	2.095	5.773	8.602	2.221
NM_001039122	Defb25	2.504	7.348	0.411	0.107	0.117	0.082	1.461	6.188	9.629	1.572	25.088	25.956	18.477
NM_020596	Egr4	1.614	6.667	0.112	NA	0.18	NA	-10.274	14.569	6.524	2.004	0.004	0.004	0.003
NM_134147	Macrod1	1.588	6.485	0.671	0.419	-0.328	0.188	-2.046	10.235	5.825	1.8	1.803	1.375	0.806
NM_001362918	Rpl38	1.622	5.443	-0.698	0.676	0.71	0.761	-0.516	0.872	6.45	1.984	2.83	4.396	6.656
NM_023456	Npy	1.905	5.197	-1.547	3.183	0.853	0.813	1.857	6.118	8.013	1.976	16.507	28.601	78.071
NM_001271725	Trim2	1.613	2.563	-1.891	5.61	2.195	7.395	0.129	0.182	5.472	1.643	1.366	5.847	20.434
NR_003513	Neat1	1.728	1.774	0.954	9.213	-1.073	12.803	-0.647	0.42	28.545	8.002	39.574	17.833	8.606
NM_001293773	Palld	1.785	1.476	1.344	0.363	-0.993	4.553	-0.444	1.231	11.916	3.335	18.008	8.612	3.104

## Sheet: 1-2 NPC-NFC down
TranscriptID	GeneSymbol	log2Fc.1	nlog10P.1	log2Fc.2	nlog10P.2	log2Fc.3	nlog10P.3	log2Fc.4	nlog10P.4	meanTPM.NPC	meanTPM.NFC	meanTPM.NPC_0uM	meanTPM.NPC_1.25uM	meanTPM.NPC_5uM
NM_009888	Cfh	-2.604	Inf	1.933	2.988	-0.558	0.748	-2.711	36.172	19.436	111.142	4.549	2.904	0.705
NM_001243009	Col6a3	-2.762	246.208	-0.052	0.042	-0.154	0.301	0.26	0.965	5.411	34.513	7.441	6.373	6.177
NM_008760	Ogn	-2.552	212.26	-0.228	0.056	-0.163	0.053	-5.196	90.687	10.163	56.128	0.32	0.273	0.295
NM_008512	Lrp1	-1.791	211.661	0.79	4.581	-0.867	19.371	1.363	77.375	11.562	37.624	55.956	29.185	15.732
NM_001081185	Flnc	-2.265	188.956	0.306	0.748	-0.603	3.843	2.192	65.548	2.941	13.299	21.06	13.177	9.976
NM_009643	Ahnak	-2.446	167.103	0.218	0.082	-1.252	19.528	0.953	15.14	2.753	14.114	13.155	5.232	4.161
NM_172731	Fgd5	-2.832	164.624	1.513	3.991	-1.041	3.108	-0.495	1.16	1.521	10.187	2.286	1.057	0.349
NM_001201391	Hbb-bs	-10.666	163.691	1.392	NA	-0.914	NA	-5.112	6.674	2.874	4329.06	0.153	0.079	0.03
NM_008218	Hba-a1	-10.455	162.141	1.87	0.814	-2.14	2.822	-3.368	11.498	8.484	11021.7	3.761	0.794	0.211
NM_001278161	Hbb-b1	-10.627	156.564	1.227	NA	-0.917	NA	-5.148	8.157	5.395	7918.97	0.288	0.148	0.057
NM_007725	Cnn2	-1.964	155.613	1.028	1.051	-1.545	21.576	0.325	1.477	43.468	159.771	164.05	53.423	24.278
NM_010917	Nid1	-2.308	145.288	1.195	9.681	-0.882	8.104	1.086	12.518	21.124	98.524	85.381	44.145	17.955
NM_010128	Emp1	-2.505	143.144	0.086	0.045	-0.374	0.973	-0.87	6.735	22.583	120.63	16.617	12.123	10.646
NM_018779	Pde3a	-2.184	138.478	1.113	4.053	-1	3.387	-1.318	15.004	3.847	16.445	3.221	1.512	0.652
NM_022563	Ddr2	-2.691	138.326	-0.32	0.403	0.048	0.046	-0.142	0.338	3.731	22.692	3.405	3.321	3.858
NM_178748	Egflam	-2.151	137.925	0.019	0.007	-0.463	0.407	-1.475	5.433	4.527	18.926	2.315	1.591	1.476
NM_007993	Fbn1	-1.711	136.861	0.77	8.306	-0.335	1.903	0.69	10.499	12.763	39.289	26.832	20.209	11.066
NM_001083955	Hba-a2	-10.586	135.624	0.873	NA	-3.041	2.76	-4.272	9.044	5.94	8435.97	2.633	0.318	0.147
NM_001361034	Mecom	-2.198	127.616	-2.315	4.286	0.281	0.258	-1.558	9.014	6.669	28.777	1.931	2.223	10.439
NM_130448	Pcdh18	-1.927	126.722	1.503	3.123	-0.764	7.635	0.778	7.728	10.392	37.207	31.342	17.509	5.721
NM_026439	Ccdc80	-2.047	124.954	-2.759	7.383	-0.085	0.091	-1.82	37.884	8.311	32.347	2.571	2.313	14.464
NM_010097	Sparcl1	-2.579	123.045	-0.37	0.218	-0.358	0.4	-1.265	12.792	10.309	57.777	5.643	4.215	5.124
NM_008220	Hbb-bt	-10.614	119.582	0.112	NA	1.141	NA	-5.922	3.45	1.09	1603.54	0	0.011	0.01
NM_016956	Hbb-b2	-10.614	119.582	0.112	NA	1.141	NA	-5.922	3.45	1.09	1603.54	0	0.011	0.01
NM_010698	Ldb2	-2.779	119.148	1.192	1.443	0.926	1.301	-1.627	9.652	3.168	20.467	0.559	1.006	0.408
NM_013845	Ror1	-2.37	116.699	0.739	0.485	-0.515	1.36	-1.842	29.351	3.869	18.794	1.602	1.061	0.586
NM_027760	Rassf8	-1.725	116.699	-0.127	0.181	-0.206	0.671	-0.052	0.148	9.304	28.924	10.678	8.813	8.981
NM_007392	Acta2	-2.475	114.519	-0.863	0.968	-1.394	3.742	-3.135	39.57	8.203	42.918	2.531	0.923	1.551
NM_007737	Col5a2	-2.388	111.073	0.166	0.059	-0.847	4.885	-1.935	27.266	14.959	73.868	7.284	3.839	3.173
NM_009653	Alas2	-8.187	110.275	-0.072	0.009	1.391	0.388	-0.759	0.319	0.339	91.285	0.078	0.197	0.189
NM_001039485	Piezo2	-2.419	108.095	0.471	0.295	-0.335	0.483	-2.239	54.992	4.805	24.147	1.337	1	0.667
NM_010740	Cd93	-5.385	106.418	0.903	0.399	-1.523	2.532	-0.752	0.723	0.202	7.986	0.355	0.118	0.059
NM_009673	Anxa5	-1.652	105.886	0.215	0.448	-0.585	5.627	2.009	97.604	29.297	86.489	182.515	115.788	93.319
NM_028266	Col16a1	-2.423	104.937	0.96	1.075	-1.619	9.586	-2.431	34.502	9.04	45.643	5.293	1.644	0.784
NM_001243073	Sema3a	-3.007	104.046	0.294	0.056	-0.322	0.124	-0.784	0.591	0.819	6.229	0.617	0.472	0.352
NM_172924	Peak1	-1.886	103.615	0.717	1.458	-0.034	0.033	1.721	20.386	3.462	12.037	12.105	11.232	6.386
NM_175088	Mdfic	-2.255	103.496	0.224	0.139	0.033	0.022	-0.834	4.889	4.475	20.088	2.554	2.458	1.959
NM_011058	Pdgfra	-3.042	100.281	1.061	1.204	0.089	0.04	-2.75	14.661	8.83	68.477	1.288	1.28	0.577
NM_008218.1	Hba-a1	-10.19	97.596	1.086	NA	0.626	NA	-1.272	0.278	0.386	404.575	0.099	0.166	0.071
NM_007729	Col11a1	-1.664	97.449	0.397	0.691	-0.108	0.143	-0.248	0.886	4.071	12.131	3.835	3.37	2.38
NM_011595	Timp3	-2.453	96.3	-1.009	1.954	-0.608	2.136	-0.645	2.517	15.373	79.167	15.554	9.644	18.06
NM_001110211	Anxa6	-1.711	96.244	0.46	2.243	-0.739	6.533	0.701	7.576	15.036	46.347	42.09	23.996	16.307
NM_019691	Gria4	-2.715	94.59	0.97	0.614	-0.418	0.319	-3.058	33.458	2.89	17.827	0.483	0.34	0.161
NM_133918	Emilin1	-2.722	94.538	0.337	0.203	-0.704	2.385	-1.355	9.514	29.274	181.763	19.247	11.232	8.281
NM_001033228	Itga1	-2.39	94.25	-0.229	0.112	0.133	0.081	0.153	0.206	1.957	9.641	2.061	2.137	2.323
NM_001177871	Filip1l	-2.378	94.25	-0.697	1.122	0.357	0.311	-1.189	4.611	5.735	27.97	2.031	2.478	3.737
NM_010905	Nfia	-2.699	93.376	0.409	0.485	-0.241	0.245	-2.013	25.758	2.875	17.548	0.878	0.7	0.489
NM_010612	Kdr	-5.95	93.3	-1.286	0.24	-2.183	2.076	-1.498	1.022	0.142	8.445	0.236	0.049	0.11
NM_001008231	Daam2	-2.443	93.196	0.615	0.441	-0.834	5.981	-1.691	26.909	5.978	30.534	3.415	1.821	1.099
NM_023617	Aox3	-2.488	92.447	0.589	0.379	-0.265	0.138	-2.608	21.023	2.467	12.984	0.499	0.396	0.246
NM_001348209	Penk	-2.572	92.258	0.549	0.151	-0.469	0.563	-2.829	32.61	25.306	142.121	5.148	3.502	2.206
NM_009152	Sema3a	-2.417	91.939	0.542	0.318	-1.453	7.592	-1.116	5.51	2.54	12.735	3.306	1.149	0.73
NM_007791	Csrp1	-1.665	91.934	0.591	0.442	-0.733	3.414	0.022	0.052	25.41	75.924	44.031	25.327	15.562
NM_133187	Fam198b	-2.676	91.213	-1.01	2.893	0.282	0.563	0.575	2.227	1.119	6.748	1.425	1.637	3.068
NM_016846	Rgl1	-2.086	90.981	0.328	0.185	0.814	4.168	0.049	0.076	10.824	43.248	6.621	11.014	8.127
NM_001310464	Reln	-2.649	90.83	0.581	0.644	-0.615	3.145	-2.47	67.542	6.366	37.469	1.826	1.128	0.71
NM_029999	Lbh	-2.214	90.398	0.477	1.933	-0.721	4.777	-0.706	4.469	22.246	97.37	23.229	13.396	9.006
NM_029967	Adamtsl1	-2.297	88.375	-0.704	0.891	-0.096	0.052	-3.753	83.86	3.072	14.181	0.253	0.224	0.339
NM_153175	Gimap6	-3.341	88.266	-0.472	0.081	0.085	NA	-3.849	11.278	1.592	15.133	0.108	0.108	0.139
NM_001347100	Cald1	-2.79	88.178	1.385	1.52	-1.301	3.613	-0.018	0.012	11.274	73.561	28.572	11.007	3.87
NM_001077495	Pik3r1	-1.893	87.487	-0.072	0.025	0.381	0.988	0.826	5.04	9.326	32.619	13.168	16.28	15.817
NM_001083316	Pdgfra	-3.165	87.352	-0.238	0.066	0.293	0.171	-1.25	3.836	2.417	20.318	0.868	0.997	1.088
NM_020260	Arhgap31	-2.315	86.778	1.174	2.83	-0.666	4.231	1.089	9.091	2.466	11.566	8.592	5.161	2.118
NM_009776	Serping1	-2.276	86.566	1.273	2.213	-0.736	2.257	-1.696	16.981	12.41	56.403	6.578	3.776	1.442
NM_011812	Fbln5	-2.573	86.458	-0.217	0.061	-0.932	1.619	-3.202	30.533	3.72	20.826	0.801	0.396	0.427
NM_172118	Myl9	-1.874	86.456	3.074	5.475	-2.479	38.08	-1.746	27.021	31.803	109.909	54.421	9.326	1.012
NM_001290308	Col12a1	-2.273	86.333	-1.126	0.249	-0.624	1.749	-2.962	66.3	10.819	49.038	2.205	1.367	2.727
NM_007429	Agtr2	-2.713	86.159	1.244	1.361	-0.019	0.009	-0.465	0.641	8.649	53.358	6.63	6.123	2.454
NM_030700	Maged2	-2.389	86.082	0.736	1.263	-0.796	8.835	-1.949	33.931	61.276	302.07	28.538	15.622	8.708
NM_011782	Adamts5	-2.486	85.888	-0.885	0.432	-0.613	0.538	-3.305	33.848	2.882	15.156	0.457	0.287	0.487
NM_011701	Vim	-1.714	84.851	0.426	0.582	0.138	0.39	2.709	127.768	95.181	294.584	584.003	611.502	423.518
NM_009933	Col6a1	-2.564	84.058	0.236	0.185	-0.659	4.088	0.278	0.719	12.164	67.934	24.044	14.5	11.455
NM_010233	Fn1	-2.284	83.873	-0.246	0.19	-0.422	2.279	0.037	0.06	39.769	182.863	56.653	40.078	44.227
NM_001291508	Pbx1	-1.726	82.996	-0.101	0.146	-0.126	0.223	-0.8	13.082	38.594	120.054	25.11	21.776	21.784
NM_001009947	Dock11	-1.729	82.777	0.421	0.987	-0.706	4.398	-0.048	0.096	7.54	23.493	12.343	7.161	5.006
NM_133721	Itga9	-1.733	82.667	0.066	0.035	1.042	6.661	0.003	0.003	22.452	70.07	11.357	22.075	19.646
NM_013724	Nrk	-1.94	81.291	0.401	0.368	0.639	1.965	0.818	5.574	3.196	11.56	3.765	5.547	3.929
NM_153790	Scarf2	-2.029	81.224	-0.324	0.247	-0.937	4.458	-1.605	18.008	13.325	51.189	8.639	4.296	5.009
NM_001033633	Slc2a13	-2.513	80.663	0.356	0.088	-0.334	0.16	-3.619	48.406	2.065	11.051	0.22	0.164	0.118
NM_001040611	Peg10	-2.534	80.357	1.07	3.238	0.1	0.074	4.852	93.654	2.882	15.692	80.413	82.038	36.472
NM_130877	Peg10	-2.534	80.357	1.07	3.238	0.1	0.074	4.852	93.654	2.882	15.692	80.413	82.038	36.472
NM_009868	Cdh5	-4.145	80.094	0.043	0.009	-0.469	0.299	-0.972	1.652	0.861	14.432	0.63	0.433	0.386
NM_001042451	Snca	-6.072	79.31	0.678	0.227	-0.774	0.688	1.409	1.49	0.378	23.527	1.766	0.983	0.579
NM_024406	Fabp4	-8.622	79.289	4.109	14.371	-0.12	0.089	5.945	29.037	0.177	66.586	12.241	10.815	0.566
NM_011403	Slc4a1	-7.865	78.867	0.894	NA	-1.544	NA	-2.944	0.602	0.034	7.904	0.013	0.004	0.002
NM_009524	Wnt5a	-2.581	77.6	-2.957	11.233	0.342	0.431	-0.615	1.865	1.665	9.411	0.89	1.066	7.687
NM_173437	Nav1	-1.715	77.584	-0.315	0.856	0.286	0.583	0.982	10.476	3.04	9.408	5.094	5.907	6.851
NM_139198	Plac8	-2.683	75.669	0.602	0.139	-1.392	0.725	-3.205	9.341	7.173	43.133	2.072	0.75	0.468
NM_007963	Mecom	-1.81	75.616	-2.701	4.956	0.231	0.242	-1.363	9.108	4.676	15.413	1.604	1.787	10.947
NM_080558	Ssfa2	-1.763	74.933	0.096	0.144	-0.338	1.851	-0.587	7.642	12.923	41.17	11.237	8.444	7.385
NM_007742	Col1a1	-2.583	74.502	0.91	0.625	-1.228	8.854	-0.29	0.733	101.349	574.141	200.658	81.702	40.076
NM_201518	Flrt2	-1.947	74.272	-0.923	1.688	0.059	0.07	-0.061	0.099	5.754	20.891	5.496	5.418	9.527
NM_009616	Adam19	-1.66	74.046	-0.188	0.049	-0.663	3.085	0.039	0.059	5.028	14.955	8.444	5.061	5.32
NM_001195431	Islr	-2.585	73.902	1.072	1.053	-1.036	1.44	-2.803	15.166	14.233	80.159	4.314	1.992	0.893
NM_009255	Serpine2	-2.444	73.584	-1.558	13.315	0.108	0.123	1.137	9.07	21.055	107.354	44.317	45.433	125.223
NM_009864	Cdh1	-2.625	73.54	-0.592	0.462	0.306	0.156	0.245	0.25	1.129	6.544	1.117	1.313	1.861
NM_011374	St8sia1	-2.223	72.685	1.366	10.55	-0.914	2.922	1.132	10.697	3.416	14.95	14.714	7.335	2.661
NM_175386	Lhfp	-1.83	72.143	0.82	1.477	0.151	0.322	0.163	0.653	26.568	88.622	27.819	29.222	15.376
NM_026376	Plxnd1	-2.283	71.124	0.887	2.205	-1.129	2.943	0.403	0.733	12.734	58.397	38.018	16.555	8.389
NM_008687	Nfib	-2.698	70.892	0.192	0.094	0.012	0.007	-1.825	11.521	2.233	13.629	0.649	0.619	0.503
NM_009197	Slc16a2	-2.682	70.771	0.386	0.418	0.08	0.074	-0.979	4.578	2.941	17.715	1.462	1.468	1.043
NM_207655	Egfr	-2.573	70.763	-0.554	0.988	-0.646	1.992	-0.915	3.961	1.652	9.246	1.422	0.862	1.177
NM_198967	Tmtc1	-2.422	70.632	-0.242	0.102	-0.4	0.427	-3.161	59.11	2.78	13.983	0.426	0.304	0.333
NM_001358619	Smarca1	-2.153	69.768	0.854	1.332	0.068	0.034	0.051	0.064	1.864	7.822	1.934	1.902	0.989
NM_001083955.1	Hba-a2	-10.207	69.627	1.083	NA	0.8	NA	-1.24	0.246	0.27	296.098	0.069	0.116	0.05
NM_008869	Pla2g4a	-1.73	69.547	0.318	0.827	-0.13	0.256	0.358	1.504	7.87	24.54	11.419	9.897	7.426
NM_001113549	Ltbp4	-2.272	69.074	-0.132	0.158	0.06	0.044	-1.245	12.938	6.709	30.469	2.817	2.781	2.842
NM_015734	Col5a1	-2.267	68.972	0.045	0.02	-0.868	6.731	-0.286	0.723	13.935	63.412	21.587	11.231	10.143
NM_172506	Boc	-1.68	68.867	0.482	2.711	-0.14	0.259	-0.283	1.179	15.07	45.438	14.074	12.163	8.15
NM_008242	Foxd1	-1.88	67.841	-0.738	0.418	-0.75	1.045	-3.093	24.438	24.516	84.957	5.018	2.811	4.367
NM_177879	Sdk1	-2.182	67.762	-0.305	0.122	-0.082	0.039	-2.165	17.311	1.45	6.189	0.351	0.317	0.363
NM_001081982	Nfix	-2.524	67.266	0.402	0.133	-0.055	0.046	-1.377	8.478	4.953	26.804	2.041	1.881	1.31
NM_010212	Fhl2	-2.414	67.057	-0.274	0.305	-1.564	11.99	-1.012	5.167	19.891	99.722	30.038	9.689	10.945
NM_172463	Sned1	-2.357	66.881	1.224	1.4	-1.009	1.461	-2.61	23.318	2.311	11.171	0.792	0.37	0.149
NM_008343	Igfbp3	-2.631	66.81	-3.374	8.94	0.546	0.394	-4.362	60.709	11.075	64.764	0.384	0.532	5.085
NM_001173506	Map1a	-2.462	66.541	1.062	7.688	-0.579	4.348	2.851	68.31	1.167	6.063	12.98	8.278	3.691
NM_009930	Col3a1	-2.635	66.324	0.96	1.434	-0.746	2.335	-1.413	9.019	79.161	465.635	51.525	29.212	13.977
NM_001243008	Col6a3	-3.032	65.896	-0.54	0.462	-0.502	0.61	0.268	0.259	1.529	11.833	2.703	1.801	2.472
NM_178598	Tagln2	-2.442	65.732	-0.373	1.342	-0.119	0.199	2.01	29.773	16.171	82.874	72.873	64.049	77.44
NM_028977	Lrrc17	-2.711	65.16	0.07	0.017	-0.639	0.679	-1.868	7.305	6.507	40.144	2.87	1.741	1.547
NM_001098203	Hic1	-2.861	64.517	-0.637	0.477	-0.746	0.79	-4.001	33.727	12.278	84.198	1.327	0.751	1.094
NM_027450	Glipr2	-2.121	64.391	0.254	0.132	-0.809	2.112	1.461	7.283	5.27	21.645	26.334	14.173	11.138
NM_017469	Gucy1b1	-2.173	64.138	-1.234	1.319	0.38	0.153	-2.73	10.914	5.165	21.947	0.626	0.763	1.689
NM_025378	Ifitm3	-2.743	64.138	0.539	0.957	-0.596	1.798	0.648	2.336	15.974	100.155	38.948	24.574	15.761
NM_001194940	Dlc1	-2.893	64.074	-0.924	0.583	-1.655	3.349	-2.955	19.18	1.065	7.485	0.451	0.134	0.239
NM_026931	Tcim	-1.844	63.866	-1.953	9.949	-0.805	2.394	-1.613	14.498	14.229	47.897	8.363	4.56	16.586
NM_016762	Matn2	-2.961	63.715	-0.068	0.019	-0.774	0.842	-1.612	4.24	1.05	7.718	0.606	0.338	0.33
NM_198247	Sertad4	-2.093	63.485	0.79	1.186	-0.861	2.297	-1.747	10.976	13.505	54.229	7.593	3.943	2.139
NM_001355130	Tm4sf1	-2.701	62.597	-0.326	0.122	-0.969	1.478	-1.023	1.85	3.148	19.22	3.136	1.512	1.775
NM_018766	Ntsr1	-1.654	62.585	5.338	10.646	-1.52	3.005	-2.892	38.877	6.015	17.777	2.38	0.798	0.019
NM_011587	Tie1	-7.338	62.575	0.67	NA	-2.217	NA	-1.899	0.359	0.047	7.081	0.06	0.012	0.007
NM_054042	Cd248	-2.928	62.106	0.644	0.8	-0.462	0.626	-0.38	0.5	5.768	41.438	6.282	4.382	2.595
NM_013834	Sfrp1	-2.138	61.949	-1.346	2.086	0.636	1.3	-3.152	68.141	26.221	108.257	1.961	2.894	6.937
NM_007542	Bgn	-3.05	61.8	0.916	0.753	-0.605	2.721	1.265	6.076	10.804	84.703	40.886	25.616	12.507
NM_011360	Sgce	-2.892	61.312	-0.116	0.065	0.347	0.291	0.978	2.629	1.841	12.797	2.938	3.547	3.587
NM_011925	Adgre5	-2.613	61.185	0.52	0.755	-0.668	1.658	1.008	3.459	1.942	11.217	6.387	3.849	2.507
NM_029838	Col25a1	-2.474	61.125	2.154	1.999	-0.34	0.187	-1.756	8.465	1.165	6.07	0.458	0.338	0.069
NM_009112	S100a10	-1.961	61.004	0.362	0.589	-0.289	0.818	2.449	65.336	28.534	104.66	195.847	153.196	110.956
NM_008973	Ptn	-1.707	60.197	0.163	0.103	0.634	4.051	-1.293	31.593	103.439	316.405	28.185	41.418	34.38
NM_008481	Lama2	-2.413	60.192	2.476	7.482	-1.681	5.927	0.141	0.151	1.496	7.523	5.552	1.616	0.27
NM_018744	Sema6a	-2.145	60.079	-2.652	20.696	-0.198	0.179	-0.338	0.589	2.483	10.34	2.341	1.929	11.39
NM_153068	Ehd2	-2.124	60.043	0.683	0.82	-0.659	5.278	0.916	7.864	4.197	17.278	12.923	7.782	4.492
NM_007925	Eln	-2.201	59.953	0.856	0.58	-0.499	0.377	-3.752	38.147	8.101	35.025	0.882	0.592	0.305
NM_026667	Fam114a1	-1.635	59.933	0.867	2.464	-0.436	3.115	1.092	17.006	7.7	22.505	22.96	16.125	8.225
NM_008688	Nfic	-1.648	59.913	0.442	0.566	-0.054	0.082	1.234	19.247	9.107	26.802	22.946	21.067	14.405
NM_021532	Dact1	-2.329	59.361	-1.038	0.548	-0.782	0.646	-2.747	12.284	8.932	42.121	2.366	1.298	2.483
NM_001161420	Vldlr	-1.965	59.275	-0.215	0.202	0.501	0.7	1.221	7.951	1.442	5.3	2.466	3.292	3.582
NM_146007	Col6a2	-2.583	59.182	0.446	0.737	-0.77	4.574	-0.253	0.51	10.683	60.559	15.758	8.826	6.03
NM_011808	Ets1	-1.926	59.154	-0.394	0.439	-0.328	0.433	-2.021	22.493	8.395	30.095	2.683	2.03	2.501
NR_028261	Rian	-2.056	58.927	-0.123	0.049	-0.186	0.153	0.959	3.935	12.375	48.567	28.44	23.67	23.895
NM_007899	Ecm1	-3.176	58.922	-0.247	0.144	-0.582	1.502	0.214	0.216	5.45	46.352	9.808	6.228	6.855
NM_026473	Tubb6	-1.892	58.71	-0.638	1.392	0.488	2.07	1.148	10.136	17.242	60.223	28.171	37.519	54.452
NM_001290481	Rxra	-2.148	58.397	0.003	0.001	-0.63	1.962	0.694	2.417	1.778	7.412	4.623	2.816	2.627
NM_001113379	Lrrc32	-2.814	58.268	-0.88	1.81	-0.582	0.886	-1.9	9.627	2.315	15.299	0.958	0.61	1.05
NM_009873	Cdk6	-1.716	58.127	-1.297	5.332	-0.311	0.399	-2.072	28.825	1.758	5.432	0.538	0.409	0.946
NM_198096	Arap1	-2.658	57.842	0.321	0.052	-2.237	4.644	-4.26	28.312	7.353	43.831	1.861	0.372	0.276
NM_007743	Col1a2	-2.683	57.637	0.15	0.054	-0.935	3.795	-2.32	21.393	61.538	374.158	24.317	12.105	10.126
NM_010101	S1pr3	-2.953	57.576	0.002	0.001	-2.258	15.902	-1.818	8.445	5.171	37.815	7.235	1.44	1.35
NM_001081421	Galnt16	-2.14	57.217	-1.232	1.426	0.421	0.142	-1.996	5.516	1.727	7.155	0.34	0.421	0.935
NM_021384	Rsad2	-7.508	57.157	2.035	NA	1.256	NA	0.163	0.029	0.03	5.059	0.014	0.033	0.008
NM_007585	Anxa2	-2.571	57.093	0.178	0.144	-0.771	4.387	1.646	14.708	51.053	285.886	280.768	157.04	129.296
NM_139300	Mylk	-1.624	57.032	0.26	0.282	1.415	3.673	-0.251	0.65	14.252	41.211	4.654	11.766	9.157
NM_174990	Gimap4	-7.336	56.133	-1.798	NA	NA	NA	-4.512	0.919	0.074	11.746	0	0	0.01
NM_028450	Gulp1	-1.954	55.737	-0.012	0.007	0.8	1.81	-0.494	1.551	4.337	15.811	1.845	3.025	2.844
NM_021896	Gucy1a1	-2.975	55.559	-4.158	5.199	1.14	0.422	-4.781	37.325	4.75	35.383	0.079	0.17	2.769
NM_021704	Cxcl12	-2.184	55.402	3.657	5.484	-1.395	27.88	-0.877	5.926	25.587	109.15	38.028	13.702	0.993
NM_001346669	Actn1	-2.534	55.274	0.605	2.444	0.318	0.897	0.195	0.323	6.702	36.602	6.371	7.554	4.628
NM_175256	Heg1	-1.931	55.19	0.225	0.172	0.055	0.038	0.307	0.489	4.055	14.559	4.983	4.944	3.927
NM_013472	Anxa6	-1.851	54.885	0.627	1.313	-0.713	5.206	0.978	9.473	20.479	69.705	68.185	39.636	23.89
NM_053082	Tspan4	-1.799	54.376	0.008	0.002	-0.849	0.75	-0.216	0.134	7.839	25.614	12.49	6.568	6.159
NM_001166065	Gcnt4	-2.669	54.219	-0.009	0.005	0.029	0.024	1.994	24.371	1.226	7.311	4.963	4.793	4.526
NM_001289463	Mme	-2.463	53.912	2.627	4.187	-1.968	4.319	-1.342	2.175	1.924	9.949	3.075	0.739	0.113
NM_172989	Lpar1	-2.182	53.633	-1.627	14.038	0.429	0.825	-0.468	1.069	4.702	20.072	2.611	3.336	9.651
NM_199473	Col8a2	-2.201	53.423	1.298	0.65	-1.523	2.757	-3.87	32.298	6.374	27.516	1.29	0.424	0.16
NM_001146268	Pdgfrb	-2.855	53.354	0.066	0.024	-1.245	6.424	-0.396	0.668	9.134	62.286	16.955	6.819	6.137
NM_018865	Wisp1	-2.551	53.311	-1.166	3.281	-1.505	6.438	0.187	0.191	1.634	8.99	5.467	1.82	3.841
NM_001003948	Pid1	-2.717	53.16	-0.703	0.419	0.012	0.004	-2.298	8.712	2.478	15.342	0.512	0.495	0.749
NM_080553	Itpr3	-2.182	52.752	0.522	1.614	-0.746	4.638	1.168	8.875	2.131	9.093	8.293	4.698	3.07
NM_001177961	Gpm6b	-2.404	52.265	-0.382	0.376	0.1	0.051	-0.192	0.226	1.312	6.574	1.12	1.13	1.379
NM_028133	Egln3	-2.814	52.265	-0.689	1.341	-0.329	0.413	-0.639	1.176	2.59	17.151	2.157	1.634	2.462
NM_008986	Cavin1	-2.188	52.171	-0.071	0.021	-0.831	4.304	1.437	13.104	10.61	45.694	52.672	28.284	27.457
NM_013586	Loxl3	-1.622	52.157	1.317	8.496	-0.697	4.243	0.815	6.681	3.711	10.727	10.903	6.405	2.396
NM_001042727	Rarg	-2.217	51.981	0.114	0.061	-0.429	0.736	0.738	2.174	2.645	11.592	6.111	4.344	3.741
NM_153534	Adcy2	-1.909	51.942	1.397	5.593	-0.145	0.173	-1.138	7.212	3.939	13.943	2.045	1.762	0.621
NM_008409	Itm2a	-2.053	51.654	-0.461	0.391	-0.868	1.484	-2.019	16.453	5.911	23.125	2.752	1.43	1.839
NM_022995	Pmepa1	-1.746	51.485	-0.295	0.308	-0.971	4.405	-0.08	0.126	3.166	9.988	6.079	2.944	3.359
NM_001164101	Add3	-3.129	51.431	1.8	3.713	0.217	0.126	-0.534	0.69	1.149	9.553	0.705	0.783	0.211
NM_009155	Selenop	-1.652	51.178	1.243	0.956	-0.193	0.13	-2.983	27.644	33.058	97.463	4.956	4.079	1.597
NM_021362	Pappa	-2.176	50.979	0.008	0.003	0.175	0.108	-2.624	44.14	1.732	7.33	0.259	0.277	0.257
NM_008744	Ntn1	-2.181	50.875	-0.014	0.003	-0.603	1.069	-4.103	72.593	33.847	144.057	3.11	1.929	1.81
NM_001285792	Wnt11	-3.646	50.825	-7.397	4.652	-6.094	NA	-7.773	6.905	0.42	5.036	0.135	0.001	0.296
NM_001039162	Clip2	-2.037	50.655	-0.348	0.299	-0.65	2.222	0.282	0.537	6.151	23.779	12.114	7.34	8.716
NM_001163522	Emcn	-3.887	50.653	2.206	2.065	-0.999	1.193	-0.882	0.913	1.285	17.912	1.446	0.692	0.138
NM_016917	Slc40a1	-2.178	50.467	0.711	1.069	-0.459	0.906	-0.166	0.278	10.594	44.889	13.422	9.253	5.273
NM_001326351	Adamts7	-2.073	50.118	-0.735	2.699	-0.042	0.034	-0.536	1.612	1.945	7.721	1.42	1.316	2.043
NM_139206	Arap3	-2.718	49.971	0.561	0.395	-1.329	6.27	0.807	3.162	0.979	6.093	4.406	1.679	1.074
NM_001042613	Selenop	-2.24	49.817	1.826	1.662	0.231	0.105	-0.211	0.127	3.636	16.094	2.781	3.115	0.805
NM_022315	Smoc2	-2.072	49.753	-3.247	8.025	-1.13	1.644	-4.384	54.243	12.408	49.113	1.347	0.581	5.233
NM_001331107	Akt1	-2.53	49.546	-0.047	0.015	0.315	0.213	1.48	5.952	7.929	42.949	18.523	21.744	21.01
NM_011244	Rarg	-2.24	49.215	-0.62	1.058	-0.922	3.116	0.321	0.504	2.775	12.334	6.766	3.4	4.882
NM_009256	Serpinb9	-2.259	49.175	0.763	2.12	0.125	0.155	0.937	4.431	1.543	6.927	2.793	2.902	1.595
NM_001102446	Alas2	-6.474	48.828	-1.944	0.587	-0.417	NA	-0.783	0.183	0.123	10.768	0.097	0.07	0.259
NM_145218	Wbscr17	-2.216	48.643	-1.582	0.753	-0.75	0.382	-3.736	23.141	1.331	5.791	0.173	0.098	0.269
NM_026271	Fibin	-2.738	48.61	1.932	3.495	-0.716	0.623	-0.691	0.908	6.108	38.045	6.457	3.7	0.914
NM_001081125	Gli2	-1.891	48.602	-0.379	0.143	0.25	0.249	-0.476	0.91	3.062	10.701	1.925	2.169	2.599
NM_001252653	Ecm1	-2.957	48.587	-0.756	0.464	-1.023	1.554	-1.034	1.999	3.443	25.23	3.512	1.651	2.589
NM_033325	Loxl2	-2.155	48.14	-1.611	3.893	-0.086	0.131	0.455	1.367	10.004	42.007	15.106	13.477	38.23
NM_025711	Aspn	-2.9	48.004	0.265	0.036	1.273	NA	-3.02	6.954	1.106	7.836	0.061	0.13	0.103
NM_030888	C1qtnf3	-2.607	47.637	-2.39	0.587	-0.989	0.325	-4.809	30.481	3.247	18.471	0.245	0.111	0.541
NM_001290482	Rxra	-2.148	47.431	0.001	0	-0.652	1.988	0.71	2.092	1.209	5.041	3.223	1.937	1.811
NM_018884	Pdzrn3	-2.351	47.137	-1.393	1.573	-0.397	0.419	-2.37	17.112	3.265	15.707	0.867	0.621	1.509
NM_021457	Fzd1	-2.362	47.08	0.536	0.237	0.194	0.228	0.6	1.52	11.393	55.168	15.701	16.95	10.825
NM_001001183	Tmem204	-3.087	46.923	-1.172	0.262	-0.9	0.204	-3.216	4.034	0.876	6.961	0.179	0.093	0.195
NM_030889	Sorcs2	-1.594	46.709	1.428	6.704	-0.568	1.417	-1.432	12.251	7.265	20.6	4.134	2.636	0.92
NM_029007	Fam84a	-2.579	46.675	-0.413	0.088	-0.095	0.032	-2.982	17.096	3.076	17.256	0.427	0.38	0.467
NM_010729	Loxl1	-2.395	46.524	-0.252	0.142	-1.105	5.572	-0.311	0.621	9.405	46.386	16.83	7.438	8.252
NM_001080775	Myo1c	-1.603	46.418	0.335	0.239	-0.672	3.454	0.536	2.844	3.487	9.989	8.307	4.962	3.655
NM_013469	Anxa11	-1.827	46.304	0.03	0.023	-0.363	0.976	0.416	1.581	6.296	20.981	11.125	8.243	7.543
NM_008587	Mertk	-1.755	46.206	-0.137	0.077	0.242	0.221	-1.77	16.027	2.361	7.508	0.608	0.679	0.696
NM_172145	Eva1b	-1.962	46.054	0.364	0.309	-1.241	4.151	-0.306	0.46	14.784	54.192	29.03	11.712	8.516
NM_016674	Cldn1	-2.344	45.547	1.002	0.412	0.036	0.011	-3.714	27.632	11.663	55.441	0.905	0.866	0.4
NM_011415	Snai2	-2.256	45.376	2.083	4.189	0.165	0.164	1.701	9.222	9.973	45.053	29.887	31.981	6.952
NM_023142	Arpc1b	-1.848	45.327	-0.151	0.107	-0.743	1.886	1.376	7.818	28.695	97.156	128.402	73.021	75.979
NM_019631	Tmem45a	-2.457	45.058	0.546	0.166	-0.411	0.224	-2.629	14.538	1.974	10.149	0.44	0.313	0.198
NM_001190974	Axl	-1.768	44.871	0.731	1.592	-1.004	3.998	0.362	0.716	5.709	18.215	15.161	7.164	4.051
NM_023396	Rprm	-3.736	44.827	-3.611	2.726	-2.243	2.253	-2.384	3.498	0.906	11.416	0.853	0.171	1.912
NM_175484	Coro2b	-1.949	44.821	1.426	11.121	-0.661	2.724	0.659	2.633	4.442	16.129	11.424	6.905	2.401
NM_008495	Lgals1	-1.774	44.791	0.43	0.319	-0.407	0.722	2.652	65.666	68.744	221.534	586.778	425.056	292.691
NM_027135	Sec24d	-1.72	44.57	0.649	1.086	-0.719	2.815	0.988	7.304	8.198	25.471	27.853	15.962	9.476
NM_010052	Dlk1	-2.459	44.42	-0.335	0.267	-0.157	0.227	2.345	22.603	9.482	49.247	55.648	47.415	55.696
NR_002870	Dnm3os	-2.333	44.075	0.523	0.336	-1.263	6.023	-1.575	13.29	1.664	7.926	1.394	0.548	0.353
NM_032398	Plvap	-4.161	43.555	5.673	53.35	-2.111	14.478	4.418	61.936	0.735	12.48	69.247	15.384	0.285
NM_001038613	Olfm1	-2.188	43.382	0.497	0.236	-0.123	0.067	0.643	0.922	1.603	6.864	2.839	2.47	1.618
NM_010137	Epas1	-3.389	43.341	0.019	0.011	-1.054	6.39	0.622	1.035	0.929	9.226	3.081	1.407	1.303
NM_001358780	Matn2	-2.233	43.222	0.546	0.605	0.453	0.533	-1.289	5.199	2.971	13.153	0.918	1.192	0.764
NM_001114663	Plcl1	-2.333	43.123	-1.796	1.072	0.411	0.393	-1.381	5.985	1.454	6.887	0.437	0.551	1.75
NM_001291455	Dpysl3	-2.76	42.825	-0.646	0.373	-0.264	0.599	1.323	7.069	1.654	10.512	5.124	4.057	5.873
NM_053083	Loxl4	-2.259	42.661	-0.249	0.035	-1.453	1.149	-4.344	27.386	1.259	5.664	0.18	0.06	0.066
NM_022000	Gnas	-3.087	42.447	0.197	0.032	-1.858	1.9	-1.731	2.086	0.797	6.346	0.915	0.237	0.193
NM_007986	Fap	-2.39	42.399	-1.107	NA	0.517	NA	-5.613	15.868	1.501	7.376	0.022	0.028	0.058
NM_011766	Zfpm2	-2.491	42.178	-0.008	0.002	-0.487	0.571	-1.768	8.023	1.338	7.111	0.572	0.388	0.358
NM_001193271	Meis1	-1.68	41.556	0.081	0.059	-0.023	0.031	-1.139	11.34	23.846	72.003	11.416	10.646	9.367
NM_009538	Plagl1	-2.433	41.534	0.407	0.297	0.257	0.307	0.147	0.203	19.878	100.159	19.117	21.585	15.063
NM_011578	Tgfbr3	-1.672	40.73	0.992	1.697	-0.228	0.416	-0.51	2.331	2.26	6.772	1.922	1.559	0.727
NM_175643	Adamts2	-1.908	40.596	0.98	0.741	-0.477	0.348	-3.198	40.417	1.88	6.631	0.297	0.201	0.095
NM_016887	Cldn7	-3.417	40.573	-1.843	3.256	0.075	0.028	2.141	5.493	0.685	6.812	2.919	2.944	10.001
NM_013846	Ror2	-2.338	40.54	-0.039	0.01	-0.352	0.541	0.058	0.05	3.957	18.832	5.446	4.037	3.851
NM_011303	Dhrs3	-1.683	40.464	0.74	0.154	-0.412	0.107	-6.734	80.499	12.973	39.161	0.169	0.118	0.065
NM_011994	Abcd2	-2.077	39.868	0.212	0.028	0.367	0.181	-2.575	17.745	1.41	5.587	0.187	0.232	0.183
NM_001013813	Maml2	-1.812	39.643	0.844	1.091	-0.482	0.812	0.706	1.846	2.22	7.335	5.237	3.564	1.836
NM_030206	Cygb	-2.784	39.531	-0.128	0.035	-0.494	0.286	-1.2	2.065	3.535	22.852	2.207	1.519	1.551
NM_008728	Npr3	-1.97	39.431	0.471	0.823	-0.334	0.879	0.685	3.592	5.204	19.16	10.976	8.215	5.523
NM_001286348	Ldb2	-2.775	39.18	0.056	0.008	-1.373	0.544	-3.529	15.813	3.347	21.597	0.75	0.283	0.251
NM_001190466	Dact1	-2.291	38.978	-0.84	0.553	-0.279	0.239	-1.496	7.787	5.242	24.012	2.349	1.829	3.015
NM_001198765	Postn	-1.932	38.934	-0.231	0.19	0.669	4.959	0.372	1.295	15.497	56.008	13.062	19.717	21.544
NM_007904	Ednrb	-3.203	38.859	0.535	0.106	0.433	0.105	-2.172	3.326	0.607	5.263	0.101	0.134	0.089
NM_146115	Tor4a	-2.231	38.821	0.647	0.982	-0.724	2.14	0.94	4.351	1.195	5.283	3.889	2.252	1.336
NM_008966	Ptgfr	-2.311	38.382	-0.835	0.177	-1.44	0.688	-4.967	25.786	1.553	7.266	0.141	0.048	0.082
NM_013415	Atp1b2	-2.202	38.378	2.127	8.977	-0.692	1.542	0.079	0.069	2.269	9.784	4.006	2.365	0.507
NM_011577	Tgfb1	-2.643	37.531	0.124	0.118	-1.359	10.134	3.501	58.448	2.044	12.018	60.852	22.73	19.453
NM_028544	Rasip1	-3.058	37.374	0.064	0.011	-0.504	0.26	-1.599	2.973	0.731	5.737	0.35	0.235	0.215
NM_001253864	Tcf12	-2.955	37.01	-1.418	1.591	0.026	0.007	-1.092	1.1	1.922	14.009	0.934	0.874	2.209
NM_133859	Olfml3	-2.561	36.786	0.087	0.015	0.06	0.022	-3.6	20.882	14.677	82.102	1.203	1.198	1.032
NM_008968	Ptgis	-1.981	36.739	-0.516	0.213	-0.382	0.408	-1.088	4.384	8.247	30.556	5.186	3.799	5.032
NM_021423	Shank3	-1.935	36.692	0.155	0.078	-1.07	5.716	-0.265	0.497	1.407	5.082	2.534	1.146	0.959
NM_194464	Mrvi1	-2.773	36.31	-0.582	0.084	0.748	0.199	-3.237	13.656	1.015	6.554	0.07	0.107	0.144
NM_053267	Selenom	-2.034	36.267	0.289	0.091	-0.662	1.039	-0.394	0.549	9.082	34.967	11.257	6.774	5.137
NM_010051	Dkk1	-3.023	36.016	-1.028	0.828	-0.271	0.199	-0.017	0.01	4.557	34.844	5.659	4.427	8.362
NM_011581	Thbs2	-2.329	35.706	-0.571	0.265	-0.946	1.818	-1.067	3.66	1.657	7.89	1.572	0.78	1.067
NM_019949	Ube2l6	-2.39	35.469	1.025	4.002	-0.529	1.482	1.529	18.375	4.992	24.399	21.331	14.156	6.515
NM_020043	Igdcc4	-1.974	35.362	-0.545	1.28	-0.046	0.032	0.8	2.862	1.491	5.512	2.803	2.547	3.49
NM_001290714	Adgrb2	-1.808	35.36	1.7	2.365	-0.673	1.492	0.275	0.418	1.579	5.205	3.135	1.872	0.531
NM_001357602	Ntm	-2.283	35.334	-0.646	0.331	-2.494	13.925	-1.55	4.021	1.217	5.58	2.432	0.405	0.591
NM_023275	Rhoj	-2.613	35.203	-0.928	0.525	-1.245	4.823	-0.834	1.594	2.103	12.159	2.89	1.163	2.035
NM_001310604	Lgi2	-1.803	34.841	-1.962	7.268	-0.315	0.208	-1.746	8.025	1.542	5.068	0.589	0.451	1.654
NM_008788	Pcolce	-2.121	34.808	1.554	2.377	-1.227	6.474	0.966	4.248	9.973	41.049	46.913	19.12	6.03
NM_146162	Tmem119	-2.755	34.58	0.395	0.049	-1.172	2.361	-0.465	0.441	2.012	12.799	3.415	1.434	0.994
NM_020277	Trpm5	-2.21	34.526	-0.022	0.002	-1.044	0.319	-5.243	26.59	1.702	7.364	0.095	0.043	0.041
NM_011511	Abcc9	-2.854	34.246	-0.448	0.085	-1.228	1.582	-2.173	7.414	1.205	8.2	0.658	0.262	0.34
NM_021278	Tmsb4x	-1.888	34.058	-0.521	0.584	-0.773	2.433	1.964	17.647	150.02	524.53	1030.9	574.404	769.482
NM_001199265	Epb41l2	-1.898	33.685	0.802	1.726	-0.669	5.023	0.121	0.218	5.429	19.078	9.662	5.781	3.09
NM_001355577	Slco1a4	-2.558	33.405	-1.673	NA	-2.997	NA	-9.346	11.728	1.007	5.566	0.011	0	0.004
NM_010430	Hic1	-2.433	33.015	-1.265	0.961	-1.639	1.533	-5.519	47.131	5.508	28.047	0.38	0.115	0.266
NM_001159301	Lgals9	-2.365	32.557	0.642	0.297	-0.16	0.068	-2.025	6.403	3.944	19.054	1.111	0.961	0.569
NM_026979	C1qtnf2	-2.244	32.525	-2.251	NA	-3.651	NA	-10.307	14.821	6.064	26.949	0.061	0	0.021
NM_139001	Cspg4	-1.835	32.455	0.393	0.938	-1.054	8.129	0.645	2.466	3.653	12.316	12.233	5.614	3.995
NM_010096	Ebf3	-2.612	32.156	-0.247	0.07	-1.724	3.351	-2.989	13.665	1.339	7.713	0.584	0.166	0.184
NM_028804	Ccdc3	-2.897	32.152	0.613	0.527	0.071	0.037	-0.481	0.479	1.19	8.353	0.846	0.836	0.512
NM_027521	Arhgap45	-1.775	32.131	1.179	1.37	-1.028	6.331	0.149	0.223	2.575	8.299	6.019	2.794	1.145
NM_198100	Tbkbp1	-1.816	32.098	0.24	0.184	-0.49	1.252	-0.23	0.434	2.747	9.125	3.384	2.3	1.81
NM_010631	Kifc3	-2.2	31.997	0.249	0.087	-0.835	1.151	-0.734	1.011	2.182	9.455	2.426	1.282	1.009
NR_027652	Meg3	-1.859	31.979	-0.3	0.135	-0.428	0.525	-0.021	0.018	12.723	43.734	17.426	12.366	14.064
NR_003633	Meg3	-1.779	31.686	0.113	0.032	0.126	0.062	1.21	2.673	2.589	8.411	5.689	5.909	5.037
NM_010906	Nfix	-2.098	31.393	0.447	0.122	-0.034	0.009	-1.937	2.899	1.571	6.314	0.437	0.407	0.275
NM_029861	Cnrip1	-1.845	31.356	0.871	1.511	-0.175	0.18	-0.317	0.485	3.819	12.916	3.58	3.018	1.531
NM_001111059	Cd34	-3.475	31.342	2.226	0.206	-0.462	0.049	-2.275	1.29	0.615	6.511	0.183	0.128	0.025
NM_013598	Kitl	-2.225	31.32	1.502	5.604	0.35	0.521	1.637	14.161	1.605	7.094	4.092	4.9	1.611
NM_001267717	Nrep	-1.604	31.267	-0.144	0.066	-1.625	3.624	-1.588	6.558	7.073	20.164	7.567	2.297	2.389
NM_011261	Reln	-2.716	31.101	-0.749	0.326	-1.625	2.227	-3.428	12.813	1.298	7.974	0.382	0.116	0.186
NM_028775	Cyp2s1	-2.786	31.035	1.721	3.821	-1.986	17.723	0.238	0.202	1.686	10.947	8.122	1.963	0.561
NM_025331	Gng11	-2.848	31.034	-0.302	0.092	-1.005	1.051	-0.791	0.876	1.868	12.718	2.216	1.061	1.213
NM_001135093	Klf14	-2.011	30.784	4.544	12.679	-0.638	1.295	-0.95	3.721	2.1	7.928	1.74	1.067	0.044
NM_021389	Sh3kbp1	-2.294	30.691	1.979	3.274	0.356	0.206	1.378	2.087	1.217	5.589	2.559	3.136	0.734
NM_010405	Hba-x	-5.004	30.574	2.592	NA	1.697	NA	-2.914	0.753	0.408	12.858	0.017	0.054	0
NM_025451	Camk2n1	-1.749	30.468	1.014	1.619	-0.324	0.768	1.934	31.713	8.003	25.23	39.78	30.085	13.991
NM_013870	Smtn	-2.285	30.461	-0.079	0.025	-0.44	0.931	-0.014	0.01	6.881	31.682	9.575	6.69	6.573
NM_015784	Postn	-1.965	30.461	-0.272	0.158	0.353	0.496	0.215	0.361	6.328	23.338	5.998	7.207	8.093
NM_010863	Myo1b	-2.457	30.261	0.206	0.089	-0.661	0.733	0.198	0.14	1.225	6.346	2.299	1.375	1.115
NM_008969	Ptgs1	-2.192	30.164	0.755	0.482	-0.717	1.036	-2.293	14.011	3.202	13.733	1.112	0.641	0.351
NM_001276408	Fn1	-2.072	30.157	-0.265	0.11	0.187	0.159	1.341	4.887	2.583	10.25	5.895	6.461	7.159
NM_011122	Plod1	-1.65	30.085	0.916	2.072	-0.711	3.984	-0.904	7.231	13.525	39.749	12.207	7.085	3.496
NM_027219	Cdc42ep1	-3.586	29.985	0.58	0.405	-1.487	7.196	1.722	6.492	0.954	10.925	9.032	3.098	1.914
NM_026405	Rab32	-2.138	29.922	-0.014	0.003	-0.07	0.038	-1.27	4.023	2.967	12.282	1.345	1.209	1.124
NM_001276410	Fn1	-2.015	29.897	0.356	0.192	-0.109	0.077	1.794	7.762	2.269	8.657	8.723	7.77	5.61
NM_001146057	Acot7	-2.157	29.865	0.704	0.993	-0.804	2.954	1.827	12.695	3.585	15.135	22.888	12.476	7.135
NM_027102	Esam	-5.076	29.665	-0.306	0.047	1.112	0.328	0.511	0.152	0.162	5.444	0.118	0.235	0.273
NM_011658	Twist1	-2.624	29.412	-1.08	1.041	-0.34	0.274	-1.491	3.618	4.442	25.785	2.07	1.55	3.048
NM_008975	Ptp4a3	-3.966	29.381	-2.218	1.922	-1.806	1.727	-0.244	0.097	0.431	6.304	1.299	0.358	1.579
NM_007903	Edn3	-2.067	29.285	1.911	1.086	-1.232	2.039	-2.515	14.387	2.077	8.157	0.88	0.357	0.086
NM_010217	Ctgf	-2.142	28.864	1.812	1.17	-1.767	20.512	-0.131	0.173	5.423	22.424	17.422	4.878	1.27
NM_009127	Scd1	-1.627	28.82	-0.127	0.104	0.103	0.185	5.489	226.19	4.111	11.941	178.175	181.639	185.494
NM_001177630	Etl4	-1.797	28.752	-0.878	0.499	-0.635	0.671	-1.251	3.086	1.629	5.291	1.104	0.675	1.144
NM_012043	Islr	-2.506	28.615	1.223	0.211	-0.999	0.937	-1.4	2.007	1.972	10.553	1.542	0.739	0.287
NM_009373	Tgm2	-2.032	28.415	-0.665	0.137	0.64	0.224	1.864	5.665	4.459	17.192	10.726	15.955	23.974
NM_001311074	Flnc	-1.655	28.187	0.166	0.174	-0.4	1.726	1.739	22.599	1.868	5.531	8.501	6.136	5.115
NM_139197	Gbgt1	-2.509	28.181	1.219	NA	-1.515	0.36	-4.072	5.634	1.656	8.866	0.288	0.093	0.038
NM_020265	Dkk2	-2.304	28.157	0.78	0.213	-1.552	1.046	-1.974	3.33	2.197	10.266	1.701	0.547	0.296
NM_001111275	Igf1	-2.123	28.128	3.777	NA	0.647	NA	-7.346	30.349	1.689	6.977	0.006	0.011	0.001
NM_009382	Thy1	-2.428	27.819	-2.779	2.298	0.5	0.304	-2.531	11.81	3.617	18.427	0.457	0.618	3.878
NM_007998	Fech	-1.787	27.762	0.993	4.023	0	0	1.32	16.804	9.984	32.13	25.73	24.507	11.456
NM_008452	Klf2	-2.061	27.748	1.233	0.221	-1.922	1.24	-7.154	71.564	18.195	71.171	0.497	0.128	0.049
NM_008026	Fli1	-2.837	27.486	-0.122	0.034	-0.02	0.009	-2.347	8.329	2.328	15.76	0.482	0.45	0.454
NM_011846	Mmp17	-2.192	27.231	-1.116	2.627	0.334	0.318	-0.564	0.822	1.453	6.248	0.808	0.963	1.966
NM_019733	Rbpms	-1.744	27.042	0.329	0.122	-0.386	0.562	0.037	0.033	1.724	5.432	2.393	1.728	1.302
NM_008344	Igfbp6	-1.737	26.838	-0.239	0.069	-0.6	0.512	-2.263	15.907	9.211	28.842	2.965	1.879	2.053
NM_013496	Crabp1	-2.254	26.493	-1.636	0.715	-0.067	0.03	-2.582	12.786	12.762	57.399	2.3	2.105	5.979
NM_181547	Nostrin	-2.778	26.443	0.832	0.225	0.073	0.018	-1.831	2.496	0.961	6.185	0.266	0.268	0.138
NM_033622	Tnfsf13b	-2.832	26.219	-1.395	0.32	-0.576	NA	-3.213	3.89	0.761	5.046	0.133	0.081	0.195
NM_021361	Nova1	-1.708	26.174	0.644	0.723	0.552	0.647	-1.595	13.473	3.57	10.941	0.841	1.165	0.698
NM_023143	C1ra	-2.176	26.11	0.519	0.171	0.123	0.053	-1.623	4.961	1.335	5.647	0.407	0.426	0.273
NM_199468	Rtl3	-2.341	26.009	0.601	NA	-1.767	NA	-6.468	13.078	1.258	5.978	0.051	0.014	0.008
NM_007855	Twist2	-2.282	25.766	0.093	0.022	-0.723	0.991	-0.004	0.003	2.945	13.514	4.97	2.876	2.498
NM_011313	S100a6	-2.427	25.606	0.581	0.581	-0.9	4.651	4.407	104.441	4.217	21.347	170.95	87.641	54.375
NM_025831	Pxdc1	-2.183	25.469	0.216	0.047	-1.418	3.015	-0.461	0.52	1.318	5.633	2.618	0.936	0.743
NM_010860	Myl6	-1.816	25.333	0.004	0.001	-0.549	0.685	-0.401	0.65	44.951	149.131	51.018	33.4	31.029
NM_054056	Pawr	-2.039	25.199	-0.906	3.361	-0.003	0.003	0.168	0.195	6.777	26.257	7.892	7.498	13.078
NM_009468	Dpysl3	-1.631	25.17	-0.592	0.626	-0.511	1.535	-0.343	0.785	4.624	13.508	5.393	3.59	5.016
NM_001077398	Ldb2	-2.589	25.168	1.339	0.186	-0.29	0.056	-2.466	2.119	1.462	8.304	0.338	0.262	0.098
NM_001097617	C1s1	-1.931	24.864	1.793	1.519	-0.878	0.773	-3.046	17.884	3.273	11.699	0.759	0.387	0.105
NM_008428	Kcnj8	-2.7	24.385	0.128	0.01	-0.943	0.216	-3.118	3.657	1.666	10.215	0.394	0.187	0.165
NM_008809	Pdgfrb	-2.713	24.313	-0.115	0.03	-1.143	2.12	-0.147	0.085	1.792	11.101	3.719	1.598	1.628
NM_010216	Vegfd	-2.786	24.035	0.283	0.203	0.51	0.571	-0.166	0.115	1.593	10.365	1.034	1.392	1.073
NM_001170433	Ppfibp1	-2.307	23.832	0.314	0.203	-0.979	2.058	0.001	0.001	1.252	5.855	2.54	1.237	0.929
NM_016861	Pdlim1	-1.884	23.817	-1.079	0.875	0.835	1.239	0.08	0.099	4.091	14.16	2.498	4.237	8.278
NM_016911	Srpx	-2.328	23.805	1.109	0.514	-0.992	1.656	-0.764	1.061	1.095	5.185	1.326	0.632	0.269
NM_011957	Creb3l1	-2.749	23.764	-0.186	0.083	-0.063	0.042	1.368	3.089	2.637	16.8	7.346	6.733	7.089
NM_008048	Igfbp7	-2.112	23.388	-0.945	1.326	-0.558	0.718	-1.486	4.794	16.693	67.969	9.043	5.863	10.494
NM_013511	Epb41l2	-2.088	23.375	1.268	5.338	0.417	1.186	1.454	6.864	3.105	12.444	6.608	8.394	3.235
NM_007897	Ebf1	-2.691	23.185	0.933	0.204	0.247	0.047	-2.402	3.382	1.26	7.665	0.213	0.235	0.113
NM_009788	Calb1	-11.072	23.156	0.013	NA	2.095	NA	0.317	NA	0.006	13.343	0	0.008	0.007
NM_011401	Slc2a3	-2.077	23.123	-1.186	1.39	0.068	0.034	-1.526	8.525	2.182	8.611	0.746	0.741	1.568
NM_172796	Slfn9	-1.588	23.112	0.961	0.418	1.309	1.469	0.048	0.023	4.133	11.656	1.76	4.216	1.996
NM_001101503	Lbhd2	-2.745	23.11	2.74	1.864	-1.782	1.911	-0.85	0.701	1.934	12.118	3.755	1.036	0.16
NM_178059	Etl4	-1.934	23.01	-0.877	0.489	-0.222	0.208	-1.404	9.001	2.01	7.19	0.91	0.747	1.261
NM_001358618	Smarca1	-1.71	22.985	0.755	1.995	-0.207	0.369	-0.341	0.645	3.424	10.56	3.236	2.661	1.466
NM_178928	Afap1l1	-1.969	22.827	-1.302	0.917	-0.566	1.672	0.804	3.151	1.362	5.033	3.632	2.329	5.437
NM_008604	Mme	-2.844	22.769	3.484	3.236	-1.205	1.06	-0.501	0.284	0.775	5.216	1.322	0.542	0.044
NM_145562	Parm1	-2.036	22.722	-0.938	1.429	-0.404	0.35	-1.362	4.053	2.147	8.226	1.14	0.823	1.472
NM_007932	Eng	-6.657	22.67	1.314	0.51	-1.696	4.023	1.604	1.278	0.17	16.122	1.708	0.512	0.187
NM_013560	Hspb1	-1.908	22.61	0.359	0.131	-1.47	5.376	-0.495	0.995	9.304	32.734	18.701	6.48	4.667
NM_134090	Kdelr3	-1.887	22.605	0.649	0.972	-0.923	2.55	-0.243	0.279	6.369	22.237	10.514	5.273	3.145
NM_001357335	Mme	-2.321	22.271	2.667	6.584	-1.732	3.483	-2.25	12.533	2.118	10.01	1.557	0.439	0.064
NM_007825	Cyp7b1	-2.185	22.259	0.187	0.051	0.067	0.023	-1.455	2.915	1.379	5.918	0.497	0.49	0.408
NM_183390	Klhl6	-2.741	21.896	0.332	0.042	-2.274	1.886	-3.979	8.528	1.112	7.007	0.353	0.071	0.052
NM_031170	Krt8	-2.13	21.717	-0.129	0.075	-0.884	1.768	0.922	2.636	1.792	7.411	6.405	3.323	3.396
NM_008597	Mgp	-1.94	21.623	1.286	8.401	-1.283	7.613	1.07	4.801	13.786	49.595	72.396	28.484	10.882
NM_001029985	Kcp	-1.599	21.619	-2.448	13.83	-0.798	1.748	-0.937	2.954	3.124	8.945	2.926	1.598	8.223
NM_172872	Kank4	-2.275	21.406	0.183	0.043	-0.758	0.814	-1.916	6.909	1.961	8.998	0.905	0.509	0.414
NM_001113414	Ebf3	-2.033	21.26	2.979	4.658	-0.639	0.427	-1.753	6.359	1.358	5.223	0.657	0.395	0.046
NM_053109	Clec2d	-2.394	21.071	-0.938	NA	-0.996	NA	-5.342	6.976	1.406	6.968	0.072	0.034	0.06
NM_010296	Gli1	-1.925	20.994	-1.464	0.838	-0.351	0.096	-5.837	54.109	5.252	18.915	0.12	0.091	0.231
NM_001364645	Plagl1	-2.327	20.653	1.272	1.077	1.507	1.953	0.904	1.01	1.23	5.748	0.832	2.274	0.873
NM_001355070	Ecm1	-2.674	20.643	-0.845	0.964	-0.727	1.552	-0.873	1.325	3.78	22.826	3.52	2.039	3.392
NM_178791	Vstm4	-1.662	20.568	3.084	4.875	-1.206	1.93	-1.906	6.202	3.8	11.39	2.421	0.988	0.108
NM_001364846	Prickle1	-1.607	20.47	-3.032	10.066	0.691	0.251	-2.173	5.275	1.854	5.316	0.264	0.408	3.089
NM_001163030	Adgre5	-2.458	20.374	0.328	0.191	-0.985	3.735	2.064	8.468	0.968	5.006	8.274	3.97	2.984
NM_146120	Gsn	-2.101	20.28	1.062	0.348	-0.544	0.327	-1.62	5.296	4.435	18.019	2.137	1.429	0.63
NM_001142952	Tent5c	-2.654	20.233	-5.086	83.55	0.282	0.132	-1.771	5.254	1.523	8.887	0.38	0.438	13.902
NM_010783	Mdfi	-2.216	20.183	-0.074	0.016	-0.914	0.902	-0.759	0.788	2.738	11.986	3.153	1.587	1.555
NM_007616	Cav1	-2.155	20.11	0.871	0.679	-0.065	0.046	-0.581	0.909	2.868	12.089	2.088	1.888	0.952
NM_001357334	Car2	-2.795	19.964	-1.611	2.938	0.422	0.113	-0.775	0.728	1.188	7.756	0.527	0.685	1.951
NM_010258	Gata6	-3.352	19.876	-0.068	0.011	0.46	0.339	-0.758	0.648	0.789	7.664	0.353	0.459	0.442
NM_010143	Ephb3	-1.875	19.498	-1.888	9.326	-0.547	0.832	-0.111	0.089	2.363	8.19	3.315	2.144	7.454
NM_011784	Aplnr	-10.121	19.379	-5.59	1.096	-1.331	NA	-0.499	NA	0.004	5.502	0.009	0.003	0.137
NM_172907	Olfml1	-1.638	19.299	3.149	4.387	-0.182	0.105	-3.163	31.354	7.157	20.879	0.941	0.789	0.08
NM_001081441	Wdr86	-1.82	19.197	-0.558	0.26	-0.234	0.108	-2.27	7.919	4.224	14.092	1.07	0.854	1.189
NM_026306	Trmt112	-1.912	19.165	0.808	2.417	-0.201	0.287	1.966	14.025	3.582	12.672	16.577	13.789	7.337
NM_007679	Cebpd	-2.219	18.947	-0.212	0.082	-0.283	0.18	-0.287	0.204	1.513	6.615	1.56	1.214	1.319
NM_007735	Col4a4	-2.067	18.924	0.717	0.348	-0.214	0.093	-4.38	57.406	2.246	8.802	0.13	0.106	0.06
NM_001159544	Frk	-1.655	18.875	-0.096	0.028	-0.513	0.601	-0.719	1.316	2.075	6.135	1.849	1.233	1.225
NM_001355662	Asb4	-3.585	18.554	0.427	0.139	-0.014	0.004	0.192	0.068	0.459	5.217	0.555	0.516	0.361
NM_001168526	Sgms1	-1.802	18.521	-2.053	2.211	-0.093	0.029	-0.643	0.494	1.557	5.08	1.101	0.97	3.836
NM_013563	Il2rg	-3.284	18.135	-0.616	0.079	-0.459	0.072	-2.1	0.961	0.645	5.913	0.214	0.151	0.208
NM_001204134	C1qtnf3	-2.141	18.024	-6.179	0.635	-3.429	NA	-9.22	11.308	1.361	5.631	0.022	0.001	0.147
NM_001253736	Pdlim2	-1.675	17.915	-0.372	0.114	-1.362	3.728	-1.411	4.133	4.452	13.328	4.446	1.633	1.967
NM_001164212	Rerg	-2.422	17.913	-0.028	0.006	0.201	0.097	-1.062	1.609	1.403	7.105	0.612	0.659	0.621
NM_001285794	Wnt11	-2.679	17.581	-4.282	1.832	-0.359	NA	-5.453	6.986	0.848	5.139	0.026	0.019	0.344
NM_001347349	Ldb2	-2.381	16.991	2.31	2.724	0.027	0.004	-0.787	0.92	1.306	6.422	0.802	0.746	0.141
NM_001297554	Apela	-2.682	16.854	0.138	0.058	0.978	1.144	0.872	1.137	1.193	7.172	1.151	2.145	1.829
NM_198724	Egfl7	-10.914	16.813	NA	NA	NA	NA	NA	NA	0	6.953	0	0	0
NM_133237	Apcdd1	-1.765	16.478	-4.431	2.688	1.255	2.853	-1.682	13.434	3.874	12.506	0.524	1.183	23.407
NM_009328	Tcf15	-2.72	16.103	2.082	3.066	-2.339	16.848	1.137	1.502	0.814	5.075	9.448	1.762	0.396
NM_001033217	Prickle1	-1.735	16.021	-2.491	25.469	0.474	0.584	-0.445	0.959	3.492	11.031	1.898	2.523	13.312
NM_145978	Pdlim2	-3.376	15.893	3.054	2.711	-1.133	1.291	0.745	0.493	0.935	9.185	3.529	1.552	0.173
NM_146184	B3gnt8	-1.718	15.754	1.159	0.88	-0.469	0.475	-0.535	0.692	1.742	5.419	1.725	1.184	0.485
NM_001286468	Arhgap24	-2.654	15.385	0.091	0.011	0.441	0.082	-2.867	6.293	1.462	8.702	0.155	0.2	0.17
NM_010728	Lox	-2.09	15.329	1.341	0.055	-1.842	0.658	-4.411	1.904	3.15	12.749	0.556	0.144	0.054
NM_001081437	Fbln2	-1.774	15.272	-1.537	3.326	-0.518	1.678	0.39	0.707	3.357	10.885	6.53	4.329	11.65
NM_021454	Cdc42ep5	-2.244	15.256	0.282	0.069	-0.883	0.742	-1.241	1.754	2.284	10.198	1.831	0.947	0.72
NM_133654	Cd34	-2.695	15.157	0.143	0.011	-0.104	0.012	-2.804	3.85	1.171	7.225	0.186	0.162	0.135
NM_007802	Ctsk	-2.259	15.015	-1.002	0.304	-0.564	0.239	-1.912	3.202	1.174	5.294	0.476	0.307	0.564
NM_001166635	Mid1ip1	-1.816	14.968	-0.545	1.318	-0.169	0.188	1.514	8.935	1.537	5.064	5.092	4.285	5.87
NM_152799	Pear1	-2.045	14.733	0.315	0.131	-0.774	0.986	-0.514	0.539	2.011	7.834	2.49	1.383	1.052
NM_001276390	Mdfi	-1.987	14.469	-0.075	0.01	-1.583	1.161	-0.927	0.592	2.008	7.474	3.244	1.023	1.001
NM_020564	Sult5a1	-1.921	14.366	1.544	0.423	-1.398	1.058	-2.54	5.653	1.623	5.775	0.756	0.272	0.085
NM_001358567	Maged2	-2.492	14.149	1.832	0.642	-0.387	0.114	-1.811	2.649	1.373	7.324	0.516	0.38	0.096
NM_011150	Lgals3bp	-1.84	14.064	0.685	0.598	-0.318	0.657	1.741	16.081	3.193	10.663	13.699	10.494	6.129
NM_001289533	Fhl2	-2.452	13.891	1.066	NA	-4.806	2.348	-6.604	6.765	1.449	7.396	0.423	0.013	0.005
NM_177779	Ccdc42	-2.288	13.839	2.787	NA	-2.256	1.806	-3.068	4.657	1.117	5.067	0.656	0.132	0.016
NM_023128	Palm	-1.979	13.237	0.097	0.063	-0.654	2.161	1.15	3.07	3.205	11.917	11.604	6.992	6.111
NM_001176528	Rara	-1.839	13.233	0.105	0.03	-0.885	1.492	0.07	0.039	1.73	5.812	3.481	1.774	1.542
NM_009928	Col15a1	-5.072	13.188	-0.637	0.305	-1.267	1.292	-1.438	1.573	0.311	10.058	0.284	0.113	0.163
NM_019521	Gas6	-1.765	13.157	0.3	0.105	-1.1	3.619	-0.402	0.508	3.028	9.756	5.097	2.244	1.692
NM_009920	Cnih2	-1.699	13.068	0.307	0.166	-0.996	3.095	0.506	0.838	1.835	5.588	5.35	2.561	1.92
NM_001146348	Eng	-7.399	13.027	1.654	1.157	-1.275	0.939	2.865	1.646	0.034	5.666	0.635	0.253	0.077
NM_133670	Sult1a1	-2.047	12.933	0.243	0.033	0.163	0.03	-3.245	8.138	1.86	7.186	0.182	0.191	0.149
NM_026772	Cdc42ep2	-2.032	12.903	1.177	2.519	-0.674	1.512	0.738	1.226	1.799	6.961	4.932	2.946	1.212
NM_007663	Cdh16	-2.944	12.785	0.016	0.005	-0.333	0.197	0.911	0.824	0.9	6.581	2.207	1.663	1.545
NM_001042614	Selenop	-2.19	12.778	0.869	0.166	0.243	0.06	-1.985	2.425	1.451	6.181	0.323	0.368	0.179
NM_008006	Fgf2	-2.336	12.712	-0.325	0.09	-0.369	0.197	-0.253	0.154	1.775	8.353	1.989	1.457	1.691
NM_010562	Ilk	-2.192	12.684	1.253	0.28	0.194	0.077	2.222	3.709	1.656	7.107	6.986	7.622	2.959
NM_001112715	Ifitm1	-1.834	12.485	0.584	0.075	-1.799	0.936	-5.278	21.413	9.734	32.504	0.89	0.236	0.153
NM_026597	Inka1	-2.274	12.266	0.95	0.938	-1.2	2.954	0.469	0.436	3.43	15.767	11.244	4.648	2.243
NM_001146124	Psap	-1.627	12.161	0.787	1.319	0.126	0.114	3.367	41.618	3.082	8.867	30.192	31.348	16.918
NM_009063	Rgs5	-2.822	11.776	5.449	23.577	0.202	0.114	0.937	1.039	0.754	5.077	1.31	1.425	0.031
NM_015776	Mfap5	-1.629	11.45	-0.928	0.088	-2.009	0.724	-5.044	11.986	2.822	8.236	0.359	0.083	0.149
NM_016854	Ppp1r3c	-1.734	11.436	1.721	2.632	-0.46	0.347	-1.117	2.247	2.058	6.394	1.351	0.925	0.265
NM_001364452	Ppp1r3b	-1.623	11.296	1.227	1.283	-0.554	0.765	1.136	2.998	1.732	5.02	5.826	3.719	1.507
NM_028444	Cavin3	-1.713	10.659	0.525	0.489	-0.596	0.899	1.246	4.24	3.625	11.24	13.312	8.428	5.452
NM_007486	Arhgdib	-1.594	10.528	0.427	0.288	0.048	0.029	0.422	0.651	5.1	14.391	6.778	6.713	4.638
NM_027852	Rarres2	-1.68	10.36	2.153	0.541	-0.643	0.378	-1.764	3.219	4.302	13.062	2.049	1.228	0.254
NM_001113486	2021-09-09	-2.094	10.311	-0.19	0.253	0.265	0.4	2.021	7.713	1.357	5.425	4.754	5.412	5.77
NM_007739	Col8a1	-2.233	10.264	-1.046	0.37	-1.624	2.207	-2.355	6.91	1.285	5.613	0.808	0.244	0.466
NM_008524	Lum	-2.712	9.995	0.546	0.09	-0.2	0.05	-2.273	3.181	1.464	9.202	0.363	0.3	0.188
NM_026416	S100a16	-2.523	9.823	0.683	0.137	-2.151	1.536	-0.558	0.207	1.219	6.646	3.724	0.802	0.481
NM_011693	Vcam1	-3.045	9.648	0.772	0.325	0.194	0.063	-2.376	4.558	1.784	14.019	0.313	0.336	0.185
NM_001313898	Postn	-2.292	9.331	-0.453	0.346	0.257	0.185	0.6	0.52	2.088	9.657	2.753	3.098	3.968
NM_001347167	Rarres2	-2.232	9.101	2.432	1.227	-0.88	0.472	-1.378	1.257	1.642	7.171	1.182	0.625	0.105
NM_181277	Col14a1	-2.447	8.863	-2.029	0.489	-0.593	0.836	-3.195	27.372	3.144	16.362	0.536	0.338	1.262
NM_001098789	Ndufa4l2	-2.729	8.707	-2.158	NA	-2.236	NA	-5.07	3.955	1.091	6.829	0.157	0.032	0.135
NM_144938	C1s1	-2.105	8.231	0.043	0.005	0.317	0.057	-3.742	6.827	1.654	6.705	0.105	0.122	0.108
NM_029344	Acyp2	-1.6	8.182	0.701	0.532	-0.413	0.564	0.243	0.229	3.592	10.286	5.866	4.172	2.375
NM_009324	Tbx2	-2.804	8.123	-2.415	0.721	-0.373	0.288	-0.75	0.912	3.632	24.081	2.904	2.12	10.399
NM_011427	Snai1	-1.978	8.1	-1.199	0.798	0.658	2.728	1.154	2.535	3.45	12.902	5.044	7.56	15.981
NM_001190451	Dcn	-2.24	7.663	0.339	0.075	0.115	0.036	-2.752	10.997	9.466	42.641	1.332	1.39	1.008
NM_001081454	Furin	-1.737	7.293	-0.156	0.118	0.078	0.049	2.017	7.27	2.819	8.844	11.314	11.242	11.68
NM_001198766	Postn	-2.349	6.756	-1.73	1.868	0.512	0.516	0.997	1.29	1.024	5.002	1.501	2.009	6.158
NM_008770	Cldn11	-2.45	6.613	-5.678	17.603	-0.146	NA	-4.884	11.15	1.471	7.741	0.055	0.047	2.348
NM_010549	Il11ra1	-1.641	6.466	1.855	4.01	0.149	0.064	-1.151	2.484	5.906	17.544	2.438	2.619	0.676
NM_019568	Cxcl14	-1.603	6.44	-5.042	5.267	1.67	0.803	-0.899	0.982	1.799	5.099	0.311	0.945	29.529
NM_175291	Dock10	-2.516	6.127	-0.259	0.079	-0.651	0.337	-3.478	10.98	0.968	5.258	0.143	0.086	0.097
NM_027286	Ace2	-3.654	5.801	-1.749	NA	0.094	NA	-6.023	7.923	0.969	11.646	0.013	0.012	0.043
NM_008091	Gata3	-4.603	5.355	-3.765	4.44	-1.161	0.508	-1.176	0.415	0.277	6.469	0.287	0.124	1.533
NM_001360648	Tbcb	-1.889	5.207	0.313	0.168	0.443	0.641	3.661	29.56	1.52	5.358	14.674	19.017	14.17
NM_001270503	Plac9b	-2.309	5.125	-1.952	NA	-1.657	NA	-6.124	4.756	1.45	6.856	0.071	0.022	0.065
NM_009731	Akr1b7	-2.801	5.078	-2.132	0.495	-0.699	NA	-3.856	2.444	0.847	5.647	0.097	0.058	0.237
NM_008630	Mt2	-2.323	4.891	-3.162	3.252	0.413	0.084	0.189	0.047	1.675	7.948	1.465	1.903	15.555
NM_001305442	Spry1	-2.498	4.853	1.748	29.124	-0.097	0.027	3.61	19.742	3.508	18.389	47.913	41.633	11.57
NM_001002927	Penk	-2.008	4.835	-1.509	NA	-3.622	NA	-5.994	6.534	1.441	5.503	0.287	0.027	0.054
NM_008221	Hbb-y	-5.487	4.275	1.856	NA	1.923	NA	-3.651	0.662	0.406	16.978	0	0.03	0
NM_001305441	Spry1	-2.115	3.726	1.722	20.334	0.109	0.074	3.629	20.788	5.079	20.771	61.219	61.916	17.522
NM_030060	Batf3	-1.612	3.413	-0.453	0.121	-0.292	0.085	-1.769	1.783	1.767	5.117	0.654	0.512	0.655
NM_001313984	Ubb	-2.098	3.091	-0.652	0.371	-0.948	0.382	3.233	11.578	1.459	5.671	26.317	13.362	19.464
NM_001032413	Pear1	-2.179	3.063	-0.448	0.281	-1.084	1.942	-0.643	0.464	1.181	5.055	1.639	0.746	0.952
NM_001177544.1	Hist1h2ao	-2.166	1.983	-1.37	1.657	0.977	1.487	-1.191	2.509	66.79	289.514	15.454	28.597	69.123
NM_025583	Ctrb1	-11.196	1.843	0.773	NA	0.164	NA	2.358	NA	0.011	25.05	0.056	0.058	0.033
NM_001042711.1	Amy2a5	-10.198	1.552	NA	NA	NA	NA	-0.816	NA	0.006	7.058	0	0	0
NM_001042711.2	Amy2a5	-10.198	1.552	NA	NA	NA	NA	-0.816	NA	0.006	7.058	0	0	0
NM_001042711.3	Amy2a5	-10.198	1.552	NA	NA	NA	NA	-0.816	NA	0.006	7.058	0	0	0
NM_001042711	Amy2a5	-10.198	1.552	NA	NA	NA	NA	-0.816	NA	0.006	7.058	0	0	0
NM_001315489	Igf2	-3.366	1.413	-0.524	0.017	-5.252	0.739	-3.752	0.534	3.439	34.113	9.74	0.251	0.342

## Sheet: 2-1 1.25-5 up
TranscriptID	GeneSymbol	log2Fc.1	nlog10P.1	log2Fc.2	nlog10P.2	log2Fc.3	nlog10P.3	log2Fc.4	nlog10P.4	meanTPM.NPC	meanTPM.NFC	meanTPM.NPC_0uM	meanTPM.NPC_1.25uM	meanTPM.NPC_5uM
NM_133186	Steap3	-1.867	10.368	3.46	63.704	-1.457	20.512	4.805	140.609	0.518	1.773	41.187	14.283	1.215
NM_133832	Rdh10	0.531	6.747	3.782	61.867	1.155	4.533	1.118	11.403	29.47	19.132	29.688	62.656	4.255
NM_032398	Plvap	-4.161	43.555	5.673	53.35	-2.111	14.478	4.418	61.936	0.735	12.48	69.247	15.384	0.285
NM_010197	Fgf1	3.225	60.136	6.944	52.93	-0.558	1.593	2.334	28.648	12.549	1.249	96.146	62.211	0.473
NM_001199556	AW551984	-0.732	8.14	4.305	51.23	-1.166	15.131	1.688	32.649	6.85	10.728	51.21	21.649	1.018
NM_009890	Ch25h	-0.663	1.918	4.56	44.979	-2.153	16.274	2.61	26.913	2.339	3.476	65.449	14.05	0.553
NM_008751	Nxph1	1.142	0.411	7.052	44.728	-1.196	5.839	5.819	61.725	0.151	0.064	20.431	8.421	0.056
NM_009741	Bcl2	1.648	60.763	2.469	44.512	0.555	2.271	-0.089	0.207	24.697	7.391	16.361	22.772	3.852
NM_009061	Rgs2	-1	9.134	3.766	40.424	-1.485	8.544	2.554	38.842	5.291	9.902	89.731	30.597	2.084
NM_001276466	Cited1	3.87	9.293	6.443	39.765	-1.477	9.813	-0.044	0.062	181.911	11.426	503.198	173.593	1.876
NM_178929	Kazald1	3.784	33.566	3.699	38.949	-1.233	6.148	1.027	4.423	7.877	0.533	38.765	15.769	1.128
NM_008278	Hpgd	2.209	47.695	4.472	37.683	-1.975	13.553	0.895	6.457	13.653	2.768	103.727	24.942	1.059
NM_007709	Cited1	3.763	19.379	4.397	36.826	-1.152	4.661	0.394	0.852	9.306	0.631	27.888	11.968	0.529
NM_177368	Tmtc2	0.756	4.182	2.546	35.752	-0.293	0.726	0.17	0.572	18.338	10.129	26.241	20.244	3.247
NM_026677	Rab13	0.093	0.214	1.82	35.016	-0.458	2.167	1.971	64.025	14.444	12.766	80.035	55.595	14.709
NM_133775	Il33	-0.474	2.524	4.588	34.464	1.835	13.994	1.382	8.474	22.337	29.154	16.808	57.222	2.22
NM_001267622	Ttc28	1.198	20.036	2.298	34.067	-0.251	0.811	0.058	0.098	42.066	17.175	53.857	43.03	8.158
NM_001277985	Snap91	3.381	37.897	2.206	33.193	-0.286	0.707	0.413	0.76	21.654	1.938	36.374	28.181	5.71
NM_001198811	Frem1	-1.426	22.988	2.847	32.954	0.258	0.443	-0.823	6.622	9.309	23.64	4.578	5.168	0.667
NM_153319	Amot	-0.599	7.39	2.066	32.646	-0.674	3.286	0.394	1.644	23.816	33.808	51.67	30.726	6.842
NM_008086	Gas1	1.124	3.151	2.428	32.209	-0.163	0.35	0.237	0.46	201.867	86.339	275.001	232.965	40.504
NM_011920	Abcg2	-0.456	3.611	2.926	30.928	-1.018	6.531	1.618	24.496	9.592	12.367	61.854	28.854	3.534
NM_027629	Pgm2l1	1.228	19.813	2.33	29.4	0.552	2.17	1.008	6.794	8.602	3.442	12.189	16.981	3.148
NM_001001881	2510009E07Rik	-1.42	44.873	2.279	29.385	-0.252	0.569	0.946	9.32	4.793	12.051	11.412	9.078	1.739
NM_018770	Cadm1	-0.243	0.668	1.732	29.137	-0.032	0.041	1.198	17.513	27.893	30.857	67.767	62.778	17.606
NM_001305442	Spry1	-2.498	4.853	1.748	29.124	-0.097	0.027	3.61	19.742	3.508	18.389	47.913	41.633	11.57
NM_001101433	Zcchc24	-0.975	21.238	1.598	28.978	-0.592	6.793	-0.095	0.234	12.919	23.864	18.862	11.867	3.659
NM_001080814	Fat3	2.167	25.486	3.141	28.549	-0.361	0.807	-0.263	0.406	8.392	1.751	9.303	6.85	0.727
NM_010043	Des	1.259	20.52	2.024	26.366	-0.399	1.766	2.844	245.362	22.756	8.989	221.523	160.39	36.881
NM_033037	Cdo1	1.706	11.954	3.746	26.359	-0.811	3.707	-0.408	1.435	11.12	3.234	15.167	8.243	0.566
NM_001081351	Cped1	1.052	14.87	2.017	26.134	-0.138	0.435	-1.016	10.276	65.545	29.615	36.847	31.789	7.353
NM_011908	Ubl3	0.1	0.299	1.921	25.03	-0.348	2.177	1.926	62.618	14.349	12.567	71.79	53.528	13.245
NM_018782	Calcrl	0.436	1.562	1.881	24.503	-0.672	2.488	-0.457	1.291	15.685	10.876	18.897	11.182	2.834
NM_008592	Foxc1	0.562	4.402	1.902	23.766	-0.214	0.457	1.238	16.199	26.59	17.024	75.403	61.678	15.395
NM_001024720	Hmcn1	0.573	2.335	1.643	23.082	-0.545	3.701	-1.541	12.792	24.599	15.447	12.731	8.28	2.477
NM_175013	Pgm5	-0.666	6.826	3.18	23.012	-0.735	5.147	1.458	21.273	4.907	7.318	23.236	13.219	1.37
NM_021050	Cftr	3.456	49.811	3.36	22.528	-0.818	5.371	1.765	24.934	8.077	0.683	50.094	26.933	2.46
NM_001033238	Cblb	1.117	27.239	2.077	21.805	-0.033	0.041	1.404	23.365	23.136	10.043	65.012	60.142	13.342
NM_177378	Rnf150	-1.355	62.807	1.881	21.788	-1.518	18.287	0.322	1.074	4.486	10.789	16.614	5.518	1.394
NM_007960	Etv1	1.517	12.252	2.8	21.144	-0.37	0.655	1.307	6.837	7.847	2.559	25.974	19.043	2.548
NM_008055	Fzd4	0.968	22.627	3.011	20.831	-0.557	6.535	0.785	11.93	21.221	10.201	55.683	35.849	4.184
NM_007621	Cbr2	1.82	0.802	3.254	20.788	-1.42	12.739	6.228	101.159	0.356	0.094	74.699	26.707	2.636
NM_054044	Adgra2	-1.553	52.628	1.593	20.596	-0.62	2.917	0.471	2.333	15.371	42.542	33.811	20.914	6.497
NM_001305441	Spry1	-2.115	3.726	1.722	20.334	0.109	0.074	3.629	20.788	5.079	20.771	61.219	61.916	17.522
NM_008817	Peg3	-0.985	16.461	2.362	20.182	-0.503	1.566	0.27	0.737	91.535	169.788	162.177	108.406	19.648
NM_031163	Col2a1	3.421	15.512	1.759	20.121	-1.442	9.307	0.456	1.8	44.853	3.875	172.962	60.349	16.707
NM_011545	Tcf21	-1.153	13.736	2.058	19.793	0.183	0.292	-0.017	0.018	42.085	88.373	37.824	40.812	9.157
NM_001110218	Ppm1h	1.434	44.543	2.619	19.757	0.273	1.177	1.339	40.012	6.472	2.251	14.012	16.081	2.459
NM_008695	Nid2	-1.428	26.392	2.328	19.633	-0.429	0.484	1.242	7.282	15.482	39.428	50.892	35.952	6.696
NM_175638	Wnk4	1.572	52.481	2.079	19.199	0.564	1.929	0.292	0.818	13	4.118	11.138	15.659	3.444
NM_001358494	Robo2	2.121	47.722	2.448	19	-0.428	1.174	0.461	1.395	36.526	7.844	69.837	49.321	8.4
NM_001085549	Trabd2b	0.935	14.733	1.753	18.936	-0.367	1.368	1.136	17.778	4.844	2.381	14.247	10.465	2.89
NM_001164724	Il33	-0.492	0.198	4.134	18.874	0.578	0.779	4.687	29.073	0.421	0.568	7.557	10.689	0.568
NM_001001980	Limch1	1.362	22.054	2.204	18.192	-0.498	1.656	0.977	9.494	9.695	3.537	27.807	18.741	3.799
NM_011224	Pygm	0.609	3.22	2.5	17.731	-0.708	3.332	-1.097	7.257	11.551	7.104	9.074	5.311	0.883
NM_001252292	Mest	-0.728	9.052	1.774	17.011	-0.657	3.855	1.043	12.458	74.867	116.401	251.452	151.302	41.287
NM_183261	Nr2f2	0.321	2.048	2.174	16.587	1.038	4.152	-0.159	0.292	28.364	21.299	12.862	24.926	5.162
NM_011546	Zeb1	-0.405	2.982	2.149	16.563	-0.107	0.135	0.04	0.06	18.839	23.4	21.616	19.062	4.012
NM_026433	Tmem100	3.467	33.334	3.03	16.243	0.345	0.313	0.944	3.207	17.636	1.472	27.432	33.266	3.815
NM_001355636	Tns2	-0.335	1.219	2.184	15.858	-0.357	0.593	1.017	5.282	2.915	3.444	7.76	5.796	1.194
NM_007409	Adh1	-1.498	3.136	4.157	15.497	1.244	1.093	2.754	9.367	0.872	2.334	2.558	5.747	0.305
NM_007592	Car8	-0.151	0.088	2.877	15.275	-1.012	5.991	5.119	125.902	0.225	0.236	16.53	7.765	0.981
NM_028709	Btbd11	3.156	54.744	1.941	15.248	0.606	1.641	-1.816	20.503	21.151	2.209	4.08	5.882	1.443
NM_008584	Meox2	3.205	38.67	4.729	15.148	-0.269	0.483	0.805	4.633	18.027	1.818	39.251	30.976	1.1
NM_001358492	Robo2	1.687	22.768	2.783	15.029	-0.046	0.029	1.154	4.347	11.432	3.311	27.236	24.993	3.364
NR_030721	Foxd2os	0.865	14.981	1.653	14.704	0.094	0.129	-0.48	2.281	10.272	5.303	7.14	7.243	2.152
NM_024406	Fabp4	-8.622	79.289	4.109	14.371	-0.12	0.089	5.945	29.037	0.177	66.586	12.241	10.815	0.566
NM_172508	Dse	-1.225	55.422	1.98	14.204	-0.559	2.704	0.948	9.66	10.624	23.364	31.288	20.083	4.743
NM_008590	Mest	-0.538	6.239	1.645	14.022	-0.711	5.018	0.17	0.529	826.206	1124.95	1572.4	912.332	271.867
NM_028166	1600014C10Rik	1.222	20.422	1.599	13.94	-1.215	4.552	-0.688	4.423	10.868	4.358	16.099	6.634	2.044
NM_009655	Alcam	-1.446	43.324	1.847	13.794	-0.108	0.17	1.036	14.337	68.724	175.656	157.394	138.311	35.95
NM_144783	Wt1	1.639	101.91	2.046	13.751	0.661	2.799	-0.78	5.015	97.319	29.292	36.959	55.761	12.576
NM_001039546	Myo6	0.763	7.769	1.809	13.285	-0.622	3.731	0.265	0.874	12.596	6.97	24.158	14.834	3.972
NM_001293561	Unc5c	1.423	18.892	1.593	13.136	0.24	0.501	-1.622	24.201	24.85	8.75	7.08	7.92	2.447
NM_011448	Sox9	-0.761	2.367	2.518	13.063	-0.587	2.637	2.18	14.573	4.302	6.828	30.244	19.151	3.134
NM_013515	Stom	0.673	3.274	1.811	12.831	-0.465	0.959	0.35	0.746	10.888	6.387	19.693	13.612	3.614
NM_011859	Osr1	3.388	129.531	2.284	12.705	0.218	0.396	-0.3	0.894	21.889	1.959	15.794	17.466	3.339
NM_029568	Mfap4	-0.772	12.625	2.372	12.705	-0.476	0.83	-2.407	46.072	69.469	111.244	18.883	12.897	2.319
NM_001159646	Dut	-0.326	0.672	2.557	12.534	0.651	1.126	1.692	8.293	2.35	2.775	4.962	7.478	1.186
NM_001163640	Chn2	1.805	23.294	1.825	12.477	-0.044	0.046	0.473	1.626	5.684	1.523	8.38	7.758	2.047
NM_011380	Six2	4.094	21.262	2.764	12.106	0.311	0.681	0.598	2.829	197.195	10.67	248.343	293.676	40.448
NM_177715	Kctd12	-1.253	53.748	2.341	12.056	0.194	0.131	0.75	2.532	8.276	18.516	12.669	13.627	2.53
NM_026993	Ddah1	0.13	0.481	2.038	11.91	-0.601	1.903	0.556	1.852	11.798	10.131	27.146	17.073	3.88
NM_028716	Phf19	2.314	162.141	2.122	11.628	1.318	13.945	-1.389	27.983	26.418	4.983	4.188	9.899	2.141
NM_010164	Eya1	4.228	17.617	2.53	11.549	0.554	1.295	0.126	0.209	25.681	1.261	19.824	27.573	4.458
NM_001360775	Ssbp2	-0.881	14.298	1.614	11.209	-0.126	0.169	-0.149	0.285	13.847	23.941	14.075	12.291	3.737
NM_001079822	Tcf7l1	0.224	0.572	1.89	10.943	-0.431	0.732	1.036	4.147	10.739	8.591	30.525	21.666	5.438
NM_001310459	Eya1	3.902	79.111	2.351	10.15	0.414	0.797	-0.603	1.773	34.002	2.106	17.327	21.992	4.033
NM_009263	Spp1	-1.053	0.628	2.478	10.088	-2.81	24.989	7.795	93.727	0.24	0.475	376.144	51.315	8.653
NM_008593	Foxd2	1.716	57.716	1.725	9.925	-0.606	1.75	-1.199	8.274	23.92	6.852	16.439	10.204	2.903
NM_178405	Atp1a2	0.884	4.282	3.388	9.109	1.008	2.642	2.493	25.858	1.915	0.974	5.532	10.555	0.955
NM_026731	Ppp1r14a	1.02	3.25	3.223	9.089	-0.676	1.44	-0.166	0.227	14.805	6.845	21.599	12.941	1.323
NM_020030	Raet1d	-0.687	2.837	2.234	8.774	-0.158	0.098	0.486	0.702	5.188	7.872	8.344	7.16	1.417
NM_001357965	Wscd1	1.054	5.149	3.281	8.766	-1.351	2.418	0.98	1.43	3.374	1.519	17.539	6.516	0.632
NM_153533	Tns2	-0.378	4.035	1.588	8.761	-0.242	0.392	0.698	2.977	13.532	16.567	26.823	21.626	6.719
NM_009472	Unc5c	1.533	15.46	1.901	8.721	0.237	0.262	-1.004	3.284	10.786	3.49	4.728	5.277	1.318
NM_001286370	Ghr	-0.83	7.823	1.989	8.425	0.092	0.058	0.671	1.534	5.082	8.463	7.91	7.968	1.865
NM_030021	Cutal	3.558	74.311	2.17	8.251	0.301	0.889	1.273	30.363	13.02	1.029	26.271	30.87	6.463
NM_001311076	Lingo1	-0.582	3.476	2.021	8.081	-0.114	0.185	1.489	23.196	3.398	4.793	10.621	9.365	2.136
NM_001177775	H60b	3.02	15.636	3.185	7.951	-1.121	1.07	0.973	1.194	4.587	0.535	20.026	8.879	0.909
NM_001252578	Sulf2	0.945	15.34	1.775	7.923	-0.873	4.17	-0.059	0.086	57.719	28.117	104.545	54.325	14.955
NM_013519	Foxc2	0.063	0.101	2.137	7.653	-0.129	0.188	-0.75	3.864	37.366	33.788	25.158	21.825	4.601
NM_009332	Tcf7l1	0.543	7.821	1.816	7.599	-0.103	0.093	1.031	4.558	26.249	16.953	59.604	52.919	13.985
NM_001359199	Ubl3	-0.372	0.245	1.596	7.147	-0.215	0.358	2.433	7.094	1.255	1.526	8.142	6.677	2.068
NM_013553	Hoxc4	0.567	4.292	1.722	7.003	0.387	0.586	0.215	0.298	16.231	10.294	14.894	18.533	5.207
NM_001042565	Wsb1	0.574	1.667	1.965	6.995	-0.132	0.073	0.302	0.484	23.396	14.821	33.125	28.138	6.792
NM_028072	Sulf2	0.52	3.912	2.609	6.784	0.178	0.132	0.62	1.11	37.599	24.602	52.878	56.994	8.712
NM_001199154	Sncaip	2.924	59.181	1.791	6.698	0.407	0.774	0.675	2.212	18.69	2.3	23.222	29.355	7.859
NM_175549	Robo2	1.786	54.478	1.982	6.649	-0.737	2.871	-0.132	0.233	19.971	5.424	31.53	17.834	4.203
NM_026408	Sncaip	3.344	69.303	2.19	6.63	0.037	0.03	0.049	0.067	8.881	0.815	9.324	9.048	1.833
NM_001039094	Negr1	0.981	6.996	2.384	6.353	0.009	0.007	-0.465	1.081	8.15	3.886	6.056	5.798	1.041
NM_019861	Ctsf	1.558	10.588	1.748	6.346	-0.852	4.852	-1.424	8.625	16.396	5.202	11.381	5.984	1.683
NM_001277983	Snap91	3.208	25.835	2.143	6.301	0.576	0.951	0.308	0.301	4.355	0.442	3.72	5.298	1.112
NM_013743	Pdk4	0.991	2.45	2.363	6.027	-0.756	3.928	2.471	23.794	1.828	0.87	17.699	9.937	1.819
NM_001252192	Eya1	4.282	13.605	2.058	5.958	0.529	1.082	-0.583	3.196	11.599	0.549	5.59	7.611	1.715
NM_177092	Msrb3	-0.905	11.167	2.179	5.739	-0.464	1.747	1.66	22.416	4.871	8.608	21.97	15.134	3.084
NM_008216	Has2	2.637	80.045	2.636	5.49	-0.678	4.38	0.617	5.088	36.492	5.487	92.861	54.862	8.327
NM_021704	Cxcl12	-2.184	55.402	3.657	5.484	-1.395	27.88	-0.877	5.926	25.587	109.15	38.028	13.702	0.993
NM_172118	Myl9	-1.874	86.456	3.074	5.475	-2.479	38.08	-1.746	27.021	31.803	109.909	54.421	9.326	1.012
NM_001347372	Eya4	2.081	39.035	1.77	5.313	0.117	0.114	0.179	0.276	20.219	4.476	21.882	22.444	6.169
NM_001113515	Col2a1	3.839	29.095	1.804	5.309	-1.003	2.174	2.179	16.627	4.179	0.273	39.011	18.671	4.955
NM_001163399	Elavl4	4.158	18.141	2.381	4.821	0.601	1.309	1.239	3.611	3.736	0.191	5.999	8.63	1.558
NM_001347459	Ablim1	-0.111	0.275	1.911	4.708	0.378	0.711	-0.112	0.284	8.018	8.118	5.9	7.281	1.824
NM_198860	Lrrc75b	0.411	0.536	1.929	4.638	-0.573	2.323	3.732	77.547	0.644	0.453	13.133	8.413	2.074
NM_023061	Mcam	0.239	0.717	1.675	4.593	-1.516	14.755	-0.01	0.014	21.207	16.911	61.756	20.644	6.084
NM_001102563	Prrt2	0.156	0.174	1.635	4.522	0.492	0.624	1.462	4.268	4.531	3.834	9.167	12.278	3.686
NM_001256122	Limch1	2.352	12.936	2.667	4.422	0.205	0.093	1.359	1.045	2.534	0.469	5.835	6.423	0.929
NM_011415	Snai2	-2.256	45.376	2.083	4.189	0.165	0.164	1.701	9.222	9.973	45.053	29.887	31.981	6.952
NM_001111267	Ncoa7	1.195	3.364	1.799	4.088	0.162	0.193	0.918	1.988	8.927	3.634	15.647	16.506	4.463
NM_198114	Dagla	1.814	37.394	1.969	4.002	-0.143	0.247	0.651	5.001	4.249	1.14	7.627	6.544	1.578
NM_013470	Anxa3	-0.568	1.661	2.187	3.826	-1.279	12.035	2.433	64.644	4.577	6.411	61.853	24.237	4.911
NM_001079909	Fgfr1	0.108	0.136	2.211	3.744	0.257	0.195	3.214	19.515	1.671	1.455	13.356	15.314	3.088
NM_001252293	Mest	-1.107	1.355	4.124	3.713	1.758	0.527	3.202	2.995	17.915	35.622	51.098	161.689	8.621
NM_001285425	Tcf24	2.026	16.399	2.4	3.626	-0.853	1.135	2.147	8.207	2.642	0.605	21.581	11.517	2.018
NM_001252579	Sulf2	0.222	0.369	2.231	3.598	0.905	1.071	2.024	6.489	6.591	5.256	14.87	26.373	5.238
NR_073086	Hoxd11	1.972	18.575	1.7	2.884	0.866	0.986	0.832	1.105	11.754	2.819	11.859	20.562	5.871
NR_037958	1300002E11Rik	1.711	7.793	1.858	2.741	0.636	0.672	0.263	0.227	7.263	2.095	5.773	8.602	2.221
NM_001302636	Phactr1	2.177	26.877	3.493	2.679	-0.339	0.493	0.37	0.785	4.691	0.97	7.991	5.941	0.501
NM_010195	Lgr5	-1.013	5.017	1.631	2.666	-1.234	10.966	3.899	114.179	0.83	1.572	30.346	12.218	3.71
NM_009047	Rem1	1.366	32.701	1.593	2.392	-0.067	0.092	1.554	59.768	40.406	14.742	127.884	116.506	36.428
NM_009504	Vdr	1.442	7.184	1.808	2.35	0.612	0.997	2.668	57.543	1.811	0.621	7.76	11.295	3.047
NM_008791	Pcp4	2.34	16.631	3.302	2.163	0.626	1.266	4.174	71.334	17.798	3.304	214.061	316.696	30.223
NM_001283048	Tmpo	-0.706	1.756	1.87	2.072	1.847	1.93	0.596	0.753	3.771	5.805	1.671	5.596	1.437
NM_016669	Crym	3.905	58.966	1.74	1.945	-0.763	0.358	-1.171	1.132	87.302	5.466	67.46	37.925	10.79
NM_013655	Cxcl12	-0.995	14.119	3.932	1.928	-1.073	9.113	-0.09	0.143	10.192	19.161	20.847	9.425	0.564
NM_175645	Xylt1	1.197	16.681	1.689	1.908	0.17	0.268	0.821	5.526	9.562	3.914	15.56	16.557	4.857
NM_010518	Igfbp5	-1.32	18.769	2.355	1.835	-0.248	0.223	-0.345	0.548	237.949	556.25	227.702	184.721	33.843
NM_001168333	Tinagl1	-2.3	7.811	1.707	1.717	-1.422	13.33	3.642	37.809	0.772	3.618	26.44	9.41	2.651
NM_001271705	Pgf	3.163	3.5	2.025	1.643	1.181	1.02	3.323	8.457	0.724	0.076	3.371	7.223	1.656
NM_007865	Dll1	0.504	1.051	1.795	1.602	0.07	0.016	0.229	0.179	8.195	5.365	9.447	9.406	2.57
NM_001276473	Cited1	5.79	3.106	5.628	1.518	4.19	1.886	5.156	3.199	0.718	0.015	1.488	25.629	0.485
NM_001161769	Lmo4	0.166	0.152	1.825	1.515	1.583	1.618	0.412	0.295	4.942	4.167	2.311	6.514	1.713
NM_001012477	Cxcl12	-1.358	31.939	3.456	1.422	-1.535	22.079	0.097	0.196	6.826	16.466	21.928	7.16	0.596

## Sheet: 2-2 1.25-5 down
TranscriptID	GeneSymbol	log2Fc.1	nlog10P.1	log2Fc.2	nlog10P.2	log2Fc.3	nlog10P.3	log2Fc.4	nlog10P.4	meanTPM.NPC	meanTPM.NFC	meanTPM.NPC_0uM	meanTPM.NPC_1.25uM	meanTPM.NPC_5uM
NM_009022	Aldh1a2	-1.554	54.555	-3.715	120.373	0.009	0.007	-2.945	141.673	146.838	405.298	19.656	18.735	230.424
NM_178793	Ccbe1	-1.777	6.154	-6.663	106.156	0.145	0.034	-3.046	8.75	0.591	1.933	0.067	0.071	6.645
NM_033373	Krt23	-3.352	10.197	-9.162	101.014	4.947	NA	-0.956	0.375	0.198	1.909	0	0.1	53.546
NM_181748	Ffar4	2.889	1.176	-6.736	100.884	2.633	1.38	0.7	0.324	0.202	0.027	0.053	0.321	32.422
NM_027871	Arhgef3	-0.506	1.261	-3.284	94.596	0.642	1.944	0.206	0.381	2.132	2.858	1.623	2.413	21.945
NM_001276489	Ism1	3.325	34.131	-3.107	84.336	0.642	2.294	-2.254	64.46	19.814	1.826	2.751	4.075	32.749
NM_001142952	Tent5c	-2.654	20.233	-5.086	83.55	0.282	0.132	-1.771	5.254	1.523	8.887	0.38	0.438	13.902
NM_015748	Slit1	1.607	11.346	-2.827	83.183	1.128	4.855	-1.786	25.748	4.703	1.436	0.647	1.34	8.87
NM_001198977	Syk	1.217	9.468	-5.434	82.862	0.626	0.199	-3.457	39.344	4.464	1.807	0.268	0.398	16.076
NM_022435	Sp5	0.677	0.701	-5.459	71.078	2.032	1.241	-1.832	3.411	1.461	0.856	0.101	0.402	16.712
NM_053080	Aldh1a3	-3.024	15.393	-5.096	68.444	-0.408	0.248	1.75	3.405	0.305	2.373	1.398	1.007	32.332
NM_009506	Vegfc	0.052	0.069	-5.505	66.534	0.678	0.487	-2.268	12.553	3.593	3.261	0.484	0.727	31.057
NM_001111023	Runx1	-1.304	2.039	-4.757	64.67	0.342	0.181	1.637	2.816	0.154	0.356	0.383	0.471	11.835
NM_001310708	Sorbs2	0.194	0.261	-3.971	64.67	1.378	3.752	-0.296	0.45	3.064	2.499	0.998	2.458	35.82
NM_001310707	Sorbs2	0.697	3.59	-4.07	62.47	0.56	1.085	-1.432	10.277	4.543	2.614	1.181	1.645	25.853
NM_172589	Lhfpl2	0.284	1.198	-2.312	61.624	-0.405	1.448	-2.229	99.433	32.61	25.327	9.491	6.816	31.66
NM_013602	Mt1	-0.89	1.118	-3.828	57.246	0.484	0.405	0.717	0.773	4.427	7.76	5.315	7.184	94.696
NM_053110	Gpnmb	-1.153	0.479	-5.106	57.246	1.433	2.563	6.219	32.298	0.052	0.108	1.518	3.964	127.192
NM_001277217	Bmpr1b	0.077	0.102	-3.15	55.928	1.813	2.685	-1.416	7.921	2.176	1.947	0.244	0.798	6.636
NM_172752	Sorbs2	0.405	0.645	-4.034	54.837	0.493	0.301	-1.035	2.063	0.831	0.587	0.302	0.4	6.062
NM_011255	Rbp4	-1.517	1.125	-4.62	54.182	1.966	1.398	1.281	0.794	0.288	0.779	0.187	0.687	15.993
NM_001037809	Cdh3	-0.678	8.86	-2.266	53.134	0.488	2.624	0.107	0.236	8.53	12.815	6.78	9.036	40.602
NM_008449	Kif5c	1.792	32.857	-1.645	46.18	1.31	13.98	1.649	61.579	4.991	1.346	6.569	15.365	44.9
NM_009523	Wnt4	1.962	29.21	-5.873	42.179	2.317	7.079	-3.224	30.557	27.268	6.533	0.604	2.853	155.904
NM_001289687	Arhgef3	1.217	0.955	-5.613	41.854	2.39	1.26	-1.273	0.846	0.524	0.211	0.046	0.211	9.817
NM_012057	Irf5	-1.423	3.786	-4.532	41.366	-0.982	1.015	-0.819	0.708	1.001	2.528	1.171	0.557	12.137
NM_001011875	Rnase12	2.038	2.369	-6.093	39.537	0.968	NA	-2.418	3.553	2.675	0.599	0.266	0.493	31.584
NM_172442	Dtx4	-0.092	0.245	-2.517	38.958	0.526	1.008	-1.315	13.101	2.886	2.892	0.828	1.14	6.076
NM_026681	Ccdc88c	1.814	41.167	-1.984	38.087	1.744	36.217	-0.014	0.025	8.575	2.282	2.613	8.339	30.825
NM_175284	Fzd10	0.712	0.653	-6.07	37.695	0.898	0.295	-3.791	14.558	1.772	1.039	0.071	0.124	7.959
NM_007532	Bcat1	-1.22	4.436	-2.357	37.075	0.08	0.07	2.35	16.255	0.414	0.905	2.051	2.075	9.931
NM_007706	Socs2	-1.584	5.468	-4.445	34.937	-0.572	0.292	-1.996	4.485	1.421	3.977	0.538	0.355	7.146
NM_001252071	Greb1	0.693	1.218	-3.364	33.717	2.047	5.324	-0.786	1.913	1.361	0.782	0.2	0.778	7.444
NM_145838	St8sia6	-0.032	0.023	-4.543	32.706	3.542	11.76	0.513	0.85	0.774	0.741	0.1	1.086	23.763
NM_010346	Grb7	-1.081	4.835	-5.28	32.452	0.622	0.387	-1.619	5.352	2.792	5.546	0.608	0.893	32.707
NM_001276402	Lef1	-0.718	4.429	-4.544	31.94	1.581	3.846	-0.237	0.229	2.187	3.385	0.644	1.825	39.398
NM_001128151	Cecr2	2.199	45.892	-3.701	31.562	1.604	5.068	-2.231	32.715	8.32	1.689	0.605	1.737	21.21
NM_008808	Pdgfa	1.838	22.031	-2.272	31.068	-0.581	2.296	-1.784	35.534	24.088	6.277	10.796	6.855	30.933
NM_009867	Cdh4	1.952	20.445	-2.552	30.895	0.8	1.871	-0.362	1.72	15.151	3.637	6.988	11.572	63.254
NM_175174	Klhl5	0.012	0.001	-3.721	29.923	3.772	2.348	4.908	7.066	0.018	0.018	0.049	0.605	7.415
NM_023842	Dsp	0.01	0.011	-3.733	29.385	0.553	0.639	-0.766	2.201	2.305	2.145	0.957	1.333	16.455
NM_013603	Mt3	-0.457	0.118	-5.966	27.804	0.858	NA	-0.351	0.07	0.36	0.458	0.16	0.28	15.898
NM_009929	Col18a1	0.654	4.621	-2.178	26.147	-0.17	0.234	-0.873	5.818	25.792	15.508	16.363	13.801	58.532
NM_008131	Glul	0.394	7.842	-2.12	26.044	0.449	3.184	-0.911	18.691	62.934	44.951	25.325	32.879	133.851
NM_001033217	Prickle1	-1.735	16.021	-2.491	25.469	0.474	0.584	-0.445	0.959	3.492	11.031	1.898	2.523	13.312
NM_011817	Gadd45g	-0.151	0.137	-2.533	25.245	1.139	1.891	0.313	0.331	10.763	11.334	6.227	13.152	71.297
NM_133664	Lad1	-0.365	0.643	-3.214	25.136	0.214	0.109	0.979	1.902	1.825	2.215	3.173	3.543	30.696
NM_001313981	Tcf7	-0.021	0.038	-1.695	24.867	0.669	3.342	0.385	1.706	8.357	7.984	7.095	10.737	32.38
NM_175314	Adamts9	-1.012	32.11	-2.692	24.48	0.495	1.097	-1.207	16.299	15.351	29.032	4.9	6.52	39.573
NM_001130416	Hdac6	-0.157	0.531	-1.781	23.986	0.155	0.248	-0.226	0.564	6.867	7.218	5.455	5.772	18.51
NM_008090	Gata2	-3.017	6.463	-4.133	23.01	1.177	1.748	1.875	2.491	0.228	1.775	0.386	0.825	13.398
NM_007431	Alpl	0.55	2.991	-3.712	22.66	1.45	2.057	-3.41	66.348	7.949	5.091	0.281	0.732	9.035
NM_011804	Creg1	-0.098	0.302	-1.911	21.515	0.537	2.832	0.493	3.374	13.376	13.474	13.373	18.506	65.096
NM_009052	Bex1	0.897	6.274	-2.229	21.368	0.283	0.274	-2.213	22.463	18.817	9.474	3.453	3.977	17.42
NM_001162494	Fzd6	0.577	1.518	-3.049	21.194	0.242	0.295	-0.433	0.934	1.693	1.072	1.099	1.226	9.456
NM_001362046	Ap5b1	1.068	6.188	-2.05	21.093	0.779	1.028	-0.244	0.383	2.545	1.136	1.298	2.101	8.163
NM_010171	F3	1.505	4.633	-1.923	20.782	-0.149	0.227	-0.898	1.581	10.293	3.389	6.283	5.399	19.143
NM_018744	Sema6a	-2.145	60.079	-2.652	20.696	-0.198	0.179	-0.338	0.589	2.483	10.34	2.341	1.929	11.39
NM_134096	Fam19a5	1.513	17.603	-2.087	20.477	0.967	1.766	-2.39	50.008	9.182	3.001	0.933	1.724	6.81
NM_021099	Kit	-1.204	6.85	-3.738	19.818	-0.636	1.01	-0.165	0.145	1.686	3.656	2.439	1.481	18.354
NM_010703	Lef1	-1.082	4.246	-3.958	19.808	1.039	0.466	-0.481	0.543	1.914	3.816	0.689	1.346	19.484
NM_007666	Cdh6	-0.273	1.209	-2.347	19.69	0.945	2.038	-0.837	4.223	3.179	3.604	0.954	1.752	8.28
NM_133753	Errfi1	-0.387	1.131	-1.937	18.795	0.375	2.099	-0.64	4.006	24.36	29.768	12.449	15.323	55.053
NM_146257	Slc29a4	0.3	0.43	-2.012	18.789	1.062	3.687	0.466	0.864	1.79	1.362	1.222	2.431	9.111
NM_001122733	Kit	-0.869	3.412	-4.342	18.781	-0.798	0.568	-0.885	0.996	1.424	2.447	1.385	0.753	14.204
NM_011361	Sgk1	-1.363	4.434	-2.547	18.74	-0.124	0.078	-1.436	2.876	4.386	10.641	1.836	1.585	8.689
NM_013869	Tnfrsf19	1.85	7.397	-3.267	18.722	2.968	4.574	-1.331	3.44	2.574	0.661	0.138	0.995	9.007
NM_001164184	Lsr	1.187	13.907	-1.612	18.687	0.703	1.521	-0.106	0.184	7.508	3.091	4.381	6.852	19.545
NM_015764	Greb1	0.695	2.021	-3.102	18.453	1.478	2.37	-1.17	3.924	3.119	1.787	0.511	1.353	10.931
NM_145459	Zfp503	0.992	15.32	-1.635	18.22	0.298	1.138	-0.296	1.142	49.536	23.523	33.916	39.601	115.374
NM_019413	Robo1	-0.086	0.354	-1.618	17.848	0.748	6.539	-0.062	0.151	20.369	20.27	12.034	19.168	55.056
NM_177469	Adgra1	3.591	5.248	-2.882	17.343	0.717	0.958	2.275	11.55	0.284	0.021	0.854	1.347	9.216
NM_172668	Lrp4	-0.239	1.196	-3.129	17.199	1.078	4.81	0.043	0.058	9.145	10.1	4.611	9.248	76.119
NM_015732	Axin2	0.619	5.829	-3.301	17.127	2.169	23.874	-1.168	17.736	10.461	6.435	1.067	4.577	41.738
NM_001081075	Fra10ac1	0.289	1.095	-1.996	16.948	0.351	0.746	-0.027	0.033	9.293	7.154	7.412	8.979	33.281
NM_029352	Dusp9	0.378	1.088	-2.019	16.384	0.835	2.371	-0.161	0.195	8.269	5.999	4.286	7.251	27.574
NM_011197	Ptgfrn	-0.429	5.325	-1.735	16.232	0.035	0.05	-0.682	6.959	13.213	16.715	8.312	8.083	25.228
NM_026778	Cthrc1	-1.29	3.729	-5.695	15.966	0.12	0.036	-2.308	4.968	3.113	7.172	0.603	0.615	29.568
NM_009829	Ccnd2	-1.368	52.285	-2.361	15.861	-0.169	0.332	-0.299	1.266	64.118	155.414	60.663	51.122	244.614
NM_026864	Rasl11a	-1.334	13.006	-3.646	15.053	-0.492	0.285	-0.858	1.144	9.295	22.07	7.541	5.006	59.379
NM_177305	Arl4c	-0.021	0.038	-2.069	15.047	0.462	0.781	-0.178	0.264	14.238	13.529	9.438	12.327	48.58
NM_029640	Trappc9	0.831	0.982	-2.769	15.044	0.03	0.017	0.107	0.087	1.218	0.65	1.327	1.28	8.169
NM_001167996	1110032F04Rik	2.644	18.814	-2.916	14.828	1.241	1.505	-1.614	8.3	3.577	0.531	0.515	1.141	8.049
NM_172989	Lpar1	-2.182	53.633	-1.627	14.038	0.429	0.825	-0.468	1.069	4.702	20.072	2.611	3.336	9.651
NM_175263	Notum	1.406	1.097	-9.045	13.981	0.586	NA	-3.528	8.093	1.024	0.375	0.061	0.088	42.463
NM_008056	Fzd6	-1.387	0.871	-4.201	13.953	0.296	0.074	-0.043	0.009	0.331	0.804	0.271	0.313	5.371
NM_001029985	Kcp	-1.599	21.619	-2.448	13.83	-0.798	1.748	-0.937	2.954	3.124	8.945	2.926	1.598	8.223
NM_001243757	Pde2a	-1.691	1.737	-3.942	13.756	2.043	0.733	0.5	0.214	0.444	1.331	0.162	0.61	8.902
NM_177350	Gldn	1.02	2.886	-1.957	13.683	1.311	3.035	-0.188	0.288	2.548	1.162	0.925	2.197	7.985
NM_021472	Rnase4	-1.063	14.427	-1.919	13.642	0.579	1.369	-0.367	1.122	8.879	17.439	4.73	6.749	23.803
NM_010835	Msx1	-2.729	2.181	-11.192	13.216	-0.193	NA	-1.242	0.198	0.051	0.325	0.027	0.021	45.699
NM_017405	Lsr	1.449	5.223	-1.697	12.382	0.296	0.449	0.382	0.846	5.817	1.992	6.387	7.425	22.627
NR_110520	2010111I01Rik	1.36	16.194	-1.946	12.12	-0.294	0.336	-1.654	13.068	17.421	6.344	6.986	5.408	19.57
NM_010111	Efnb2	-0.795	4.07	-2.195	11.935	0.035	0.025	-0.611	1.548	7.103	11.657	4.71	4.571	19.435
NM_029662	Mfsd2a	-0.421	0.33	-2.48	11.53	0.25	0.154	0.3	0.199	0.859	1.091	0.927	1.035	5.46
NM_007826	Dach1	0.869	1.852	-1.878	11.513	1.812	3.508	-0.833	2.935	4.953	2.568	0.825	2.727	9.359
NM_019707	Cdh13	2.899	12.291	-2.094	11.446	0.666	1.505	1.841	12.758	0.825	0.103	1.926	2.905	11.534
NM_009524	Wnt5a	-2.581	77.6	-2.957	11.233	0.342	0.431	-0.615	1.865	1.665	9.411	0.89	1.066	7.687
NM_024285	Bves	1.572	2.76	-1.716	11.171	0.856	1.688	1.409	6.076	1.718	0.533	2.603	4.49	13.826
NR_110345	Adarb2	1.549	16.307	-1.616	10.79	1.775	14.337	-1.122	11.845	5.847	1.864	0.81	2.635	7.58
NM_175507	Slc35g1	1.491	10.788	-2.241	10.707	1.428	3.68	-1.072	4.804	2.914	0.979	0.53	1.357	6.041
NM_013910	Kdm2b	-0.014	0.022	-2.552	10.694	0.436	0.904	-0.647	2.55	29.914	28.241	14.583	18.739	103.568
NM_007936	Epha4	0.258	1.258	-2.989	10.271	0.95	0.992	-0.887	2.201	8.57	6.733	2.489	4.537	33.98
NM_001079848	Adgrg2	0.761	0.243	-3.375	10.153	5.862	10.769	2.551	2.687	0.161	0.091	0.017	0.923	8.888
NM_011797	Car14	1.402	6.622	-2.556	10.128	1.252	1.516	-2.85	23.856	8.812	3.094	0.527	1.191	6.617
NM_010090	Dusp2	1.651	11.652	-2.237	10.113	-0.831	1.405	-1.229	3.949	13.045	3.873	10.185	5.438	24.155
NM_001004366	Scube3	0.818	12.278	-2.785	10.033	-0.182	0.291	-1.03	9.085	16.541	8.81	9.503	7.945	50.773
NM_001038610	Dach1	0.844	8.899	-1.771	9.97	1.083	1.676	-1.144	5.207	15.881	8.295	3.538	7.026	22.439
NM_026931	Tcim	-1.844	63.866	-1.953	9.949	-0.805	2.394	-1.613	14.498	14.229	47.897	8.363	4.56	16.586
NM_172371	Slc16a13	0.927	3.842	-2.133	9.864	-0.254	0.275	-0.026	0.022	2.214	1.094	2.676	2.127	8.802
NM_172826	Dact2	-0.767	2.602	-3.459	9.841	1.096	0.712	-2.102	5.208	3.226	5.181	0.362	0.734	7.668
NM_013822	Jag1	0.491	2.741	-3.242	9.755	0.474	0.404	-0.933	2.542	20.579	13.663	7.999	10.565	94.289
NR_151694	Gm12915	0.87	0.674	-2.295	9.69	0.744	0.615	0.633	0.495	0.748	0.382	0.715	1.141	5.177
NM_010143	Ephb3	-1.875	19.498	-1.888	9.326	-0.547	0.832	-0.111	0.089	2.363	8.19	3.315	2.144	7.454
NM_007669	Cdkn1a	0.509	1.557	-1.938	9.051	0.004	0.003	3.658	109.937	3.328	2.196	43.19	41.243	148.13
NM_008343	Igfbp3	-2.631	66.81	-3.374	8.94	0.546	0.394	-4.362	60.709	11.075	64.764	0.384	0.532	5.085
NM_010413	Hdac6	0.346	1.018	-1.673	8.94	0.039	0.028	-0.476	1.054	5.694	4.185	4.126	3.998	11.975
NM_001291131	Asgr1	-0.296	0.035	-4.476	8.779	0.702	0.163	1.354	0.347	0.134	0.152	0.218	0.333	7.146
NM_133351	Prss8	-0.587	1.15	-2.288	8.485	0.571	0.624	0.032	0.023	1.563	2.218	1.107	1.562	7.205
NM_001312908	Cux2	0.96	4.916	-3.509	8.141	0.143	0.184	-1.254	13.511	3.998	1.947	1.569	1.644	17.266
NM_022315	Smoc2	-2.072	49.753	-3.247	8.025	-1.13	1.644	-4.384	54.243	12.408	49.113	1.347	0.581	5.233
NM_001045530	Ccnjl	0.433	1.51	-1.948	8.019	0.808	2.167	0.031	0.032	7.209	5.02	4.362	7.252	26.225
NM_001359401	Klhl5	-0.904	0.783	-2.166	7.808	1.062	2.034	2.263	5.76	0.312	0.545	0.74	1.462	6.091
NM_019431	Cacng4	-1.046	3.617	-2.41	7.786	0.967	0.901	-1.031	1.847	2.321	4.513	0.606	1.115	5.583
NM_001164155	Tnfrsf19	2.648	19.299	-2.759	7.687	2.168	3.631	-1.213	2.691	3.293	0.5	0.332	1.397	8.764
NM_001190297	Gpr155	0.425	0.787	-2.924	7.635	-0.177	0.128	-0.349	0.461	0.961	0.667	0.884	0.736	5.291
NM_144846	Fam49b	0.324	1.175	-2.087	7.504	-0.36	0.336	-0.681	1.266	4.745	3.549	3.934	2.89	11.59
NM_026439	Ccdc80	-2.047	124.954	-2.759	7.383	-0.085	0.091	-1.82	37.884	8.311	32.347	2.571	2.313	14.464
NM_010132	Emx2	-0.621	1.841	-3.251	7.272	1.726	2.247	-0.709	1.216	7.022	10.11	1.349	4.233	37.956
NM_175445	Rassf2	-1.092	16.523	-2.787	7.243	2.155	5.931	-0.41	0.517	3.808	7.626	0.657	2.809	18.307
NM_011491	Stc2	1.561	4.911	-3.454	7.077	1.011	0.975	-1.614	5.563	2.716	0.853	0.453	0.866	8.787
NM_009704	Areg	-1.485	0.38	-2.615	7.048	0.886	0.899	5.405	12.192	0.064	0.166	1.466	2.585	14.663
NM_026323	Wfdc2	-0.401	0.83	-2.027	6.81	0.258	0.125	0.694	1.127	13.582	16.793	18.573	21.497	82.607
NM_001310762	Tenm4	-0.957	21.742	-2.725	6.747	-0.041	0.008	-2.454	17.236	7.59	13.866	1.475	1.36	8.307
NM_010218	Fjx1	-0.671	2.855	-1.866	6.747	0.733	1.312	-0.235	0.282	4.356	6.518	2.298	3.627	12.345
NM_001024955	Pik3r1	-1.09	5.183	-2.328	6.685	1.3	1.536	-0.398	0.531	3.318	6.633	1.075	2.461	11.638
NM_001276403	Lef1	-1.083	1.704	-3.023	6.61	4.426	4.484	0.688	0.425	0.55	1.108	0.048	0.878	6.521
NM_010637	Klf4	-0.713	0.784	-2.306	6.532	-0.2	0.153	-4.189	32.298	23.614	36.274	1.534	1.263	5.823
NM_029035	Spsb1	-0.588	4.94	-1.762	6.457	-0.314	0.893	-0.47	2.412	7.331	10.358	6.789	5.193	16.357
NM_198604	Plekhg6	2.855	26.51	-1.798	6.35	0.676	1.202	-0.83	4.667	7.135	0.914	2.586	3.935	12.885
NM_011597	Tjp2	1.236	39.967	-1.738	6.177	0.373	1.028	-0.641	4.285	11.955	4.767	6.106	7.511	23.305
NM_013601	Msx2	3.072	2.444	-6.607	5.984	2.823	2.131	0.303	0.147	0.294	0.034	0.052	0.358	31.829
NM_007759	Crabp2	-0.443	2.788	-2.014	5.831	0.66	1.291	-0.421	0.912	45.346	57.819	22.357	33.156	126.317
NM_008485	Lamc2	-1.435	20.503	-2.264	5.678	0.957	1.768	1.161	8.466	3.202	8.09	3.802	7.028	31.839
NM_009285	Stc1	1.124	9.783	-1.809	5.677	1.216	5.215	-0.1	0.105	10.319	4.436	4.268	9.458	31.004
NM_001195084	Plscr2	-0.762	1.287	-3.533	5.628	0.63	0.149	-0.602	0.289	0.795	1.264	0.33	0.518	5.548
NM_001271725	Trim2	1.613	2.563	-1.891	5.61	2.195	7.395	0.129	0.182	5.472	1.643	1.366	5.847	20.434
NM_172775	Plxnb1	0.419	10.949	-1.599	5.583	0.046	0.064	-0.988	14.169	14.737	10.367	7.441	7.286	20.768
NM_134038	Slc16a6	0.75	1.347	-1.67	5.375	1.062	3.652	-0.864	3.107	4.139	2.273	1.117	2.222	6.662
NM_008037	Fosl2	-1.076	7.138	-1.898	5.336	-0.387	0.888	-0.8	2.643	5.797	11.48	4.482	3.258	11.282
NM_019568	Cxcl14	-1.603	6.44	-5.042	5.267	1.67	0.803	-0.899	0.982	1.799	5.099	0.311	0.945	29.529
NM_152813	Plcd3	1.896	37.029	-1.769	5.26	-0.044	0.022	-0.735	1.38	7.989	2.02	5.095	4.682	15.07
NM_010235	Fosl1	1.162	1.137	-1.895	5.18	1.164	1.681	1.366	2.001	0.833	0.352	0.982	2.11	7.313
NM_001362866	Rassf2	-2.392	14.789	-2.997	5.078	1.286	0.662	0.797	0.74	0.408	2.01	0.306	0.691	5.245
NM_023596	Slc29a3	-0.213	0.825	-1.933	5.077	0.803	2.375	0.706	2.255	4.041	4.403	3.916	6.496	23.238
NM_030244	Ier5l	-1.014	4.165	-1.78	5.077	-0.705	1.64	0.427	0.624	9.688	18.542	21.875	12.791	40.927
NM_031166	Id4	0.445	1.34	-2.01	5.077	0.693	1.003	0.206	0.392	10.304	7.145	7.65	11.651	44.229
NM_181318	Rasgef1b	-0.281	0.255	-1.706	5.008	1.666	3.648	1.046	2.542	1.467	1.656	0.988	2.982	9.095
NM_007963	Mecom	-1.81	75.616	-2.701	4.956	0.231	0.242	-1.363	9.108	4.676	15.413	1.604	1.787	10.947
NM_008482	Lamb1	-0.752	20.787	-1.716	4.942	-0.004	0.003	-0.962	5.289	53.287	84.177	28.385	26.817	83.014
NM_026505	Bambi	-0.313	0.561	-1.627	4.923	0.107	0.119	-0.009	0.008	2.127	2.501	2.024	2.074	5.96
NM_018777	Cldn6	-1.572	19.647	-1.962	4.716	0.707	1.145	0.242	0.336	4.051	11.272	3.037	4.692	17.243
NM_028872	Inava	-0.796	3.454	-1.596	4.711	0.195	0.22	0.058	0.05	2.723	4.456	2.558	2.779	7.828
NM_181549	Clec18a	0.943	3.825	-2.329	4.662	0.755	0.283	-2.544	8.488	13.086	6.357	1.361	2.206	10.41
NM_080595	Emid1	0.422	1.195	-2.374	4.548	-0.082	0.019	-0.563	0.522	17.239	12.057	12.739	11.404	56.022
NM_001361034	Mecom	-2.198	127.616	-2.315	4.286	0.281	0.258	-1.558	9.014	6.669	28.777	1.931	2.223	10.439
NM_008087	Gas2	0.499	0.835	-1.606	4.201	-0.009	0.006	-0.482	0.681	10.908	7.319	8.071	7.662	22.013
NM_008635	Map7	0.068	0.11	-1.914	4.137	0.353	0.521	0.041	0.048	2.718	2.441	2.248	2.751	9.747
NM_027460	Slc25a33	0.907	7.655	-1.591	4.02	-0.012	0.006	0.142	0.119	7.526	3.757	8.633	8.103	22.961
NM_033325	Loxl2	-2.155	48.14	-1.611	3.893	-0.086	0.131	0.455	1.367	10.004	42.007	15.106	13.477	38.23
NM_008471	Krt19	0.497	0.217	-1.846	3.801	0.126	0.07	2.265	6.777	0.577	0.395	2.619	2.748	9.116
NM_001330607	Gas2	0.157	0.401	-1.602	3.794	0.389	0.55	-0.435	2.511	9.827	8.252	5.788	7.13	20.373
NM_001309439	Sct	-0.252	0.063	-1.987	3.756	-0.121	0.093	3.93	17.575	0.739	0.839	12.479	10.955	40.251
NM_009404	Tnfsf9	-0.707	1.82	-1.798	3.679	0.537	0.594	-0.624	1.015	3.244	4.952	1.493	2.07	6.655
NM_027280	Nkd1	-0.639	4.111	-3.466	3.642	1.005	8.371	-0.678	3.827	8.683	12.788	2.795	5.338	54.266
NM_010055	Dlx3	2.36	2.436	-4.73	3.631	1.815	1.588	-0.126	0.053	0.354	0.066	0.095	0.319	7.767
NM_008342	Igfbp2	1.372	41.543	-2.039	3.514	-0.351	0.275	-3.278	40.187	53.006	19.261	7.131	5.341	20.421
NM_001143849	Pde2a	-2.26	13.779	-4.02	3.508	2.524	1.596	1.46	2.082	0.644	2.939	0.302	1.733	26.693
NM_007483	Rhob	-0.892	28.769	-1.831	3.404	-1.105	4.108	-1.848	17.358	55.162	96.524	33.927	15	49.636
NM_026125	C1qtnf12	2.253	46.14	-2.082	3.355	0.391	0.34	-0.428	0.558	52.01	10.222	30.382	37.771	149.231
NM_001166537	Hmga1	0.074	0.094	-1.62	3.297	-0.568	0.467	-0.977	1.482	4.967	4.44	3.87	2.463	7.144
NM_016887	Cldn7	-3.417	40.573	-1.843	3.256	0.075	0.028	2.141	5.493	0.685	6.812	2.919	2.944	10.001
NM_008630	Mt2	-2.323	4.891	-3.162	3.252	0.413	0.084	0.189	0.047	1.675	7.948	1.465	1.903	15.555
NM_010311	Gnaz	1.091	8.218	-1.938	3.225	-0.481	1.216	-0.157	0.292	3.842	1.687	4.966	3.389	12.237
NM_016907	Spint1	-1.713	8.149	-1.922	3.158	0.36	0.264	2.209	9.489	0.781	2.418	2.887	3.543	12.681
NM_011328	Sct	0.06	0.024	-1.756	3.146	-0.088	0.06	3.793	31.397	1.467	1.313	22.092	19.869	62.377
NM_001356948	Dpysl5	-0.352	0.937	-2.089	2.947	0.624	0.746	-0.339	0.467	1.943	2.319	1.029	1.501	6.06
NM_001287171	Sct	-0.503	0.06	-2.698	2.869	-0.745	0.415	2.911	1.625	0.193	0.257	2.484	1.407	8.483
NM_007554	Bmp4	0.575	2.725	-1.721	2.745	-0.486	0.74	-1.781	12.719	8.437	5.342	3.54	2.41	7.353
NM_133237	Apcdd1	-1.765	16.478	-4.431	2.688	1.255	2.853	-1.682	13.434	3.874	12.506	0.524	1.183	23.407
NM_010056	Dlx5	-4.033	NA	-7.327	2.66	-1.898	0.954	5.054	1.189	0	0.059	0.474	0.123	17.761
NM_016778	Bok	-0.214	0.344	-1.875	2.511	0.198	0.067	-2.333	6.058	11.024	12.098	1.967	2.13	7.415
NM_001039385	Vgf	0.087	0.021	-2.339	2.496	-0.579	0.51	4.003	15.679	0.098	0.088	2.427	1.548	7.417
NM_008812	Padi2	2.697	55.903	-2.04	2.492	0.74	2.215	-2.923	91.18	11.024	1.588	0.898	1.427	5.543
NM_027990	Lypd6b	-1.403	5.65	-1.757	2.173	0.766	0.471	1.106	1.256	0.771	1.932	1.004	1.623	5.19
NM_138313	Bmf	2.516	41.024	-1.815	2.16	-1.261	4.09	-2.718	30.239	13.483	2.201	5.056	2.002	6.538
NM_212457	Bex4	1.134	15.61	-1.599	2.038	0.658	0.91	-2.243	32.385	20.66	8.855	2.882	4.295	12.268
NM_001302389	Plpp2	0.057	0.027	-1.669	1.991	-0.401	0.161	0.343	0.176	1.349	1.216	2.326	1.67	5.039
NM_001025577	Maf	0.039	0.054	-1.652	1.98	-0.882	2.812	-1.296	7.482	8.515	7.78	6.611	3.404	9.845
NM_001198766	Postn	-2.349	6.756	-1.73	1.868	0.512	0.516	0.997	1.29	1.024	5.002	1.501	2.009	6.158
NM_008498	Lhx1	0.485	1.119	-3.656	1.74	1.175	0.299	-2.563	3.395	20.002	13.253	1.558	3.316	39.673
NM_029639	Plet1	0.033	0.021	-1.663	1.66	2.021	15.09	2.476	25.059	1.679	1.525	2.366	9.187	27.371
NM_177068	Olfml2b	-1.542	3.306	-3.798	1.6	-0.21	0.149	0.214	0.133	0.609	1.691	0.844	0.694	8.835
NM_001310659	Igfbp2	1.642	1.813	-1.898	1.574	2.996	3.053	-1.033	0.964	4.455	1.299	0.291	2.162	7.396
NR_038057	Lhx1os	0.292	0.253	-3.194	1.537	0.56	0.061	-2.976	2.682	5.301	4.045	0.483	0.66	5.729
NM_026878	Rasl11b	-0.303	0.935	-1.747	1.463	-0.698	1.143	-3.216	44.447	15.814	18.417	2.837	1.668	5.163
NM_018805	Hs3st3b1	-0.342	1.299	-2.154	1.34	0.869	1.194	-0.065	0.064	4.419	5.253	2.378	4.15	17.426

## Sheet: 3-1 1.25-0 up
TranscriptID	GeneSymbol	log2Fc.1	nlog10P.1	log2Fc.2	nlog10P.2	log2Fc.3	nlog10P.3	log2Fc.4	nlog10P.4	meanTPM.NPC	meanTPM.NFC	meanTPM.NPC_0uM	meanTPM.NPC_1.25uM	meanTPM.NPC_5uM
NM_026681	Ccdc88c	1.814	41.167	-1.984	38.087	1.744	36.217	-0.014	0.025	8.575	2.282	2.613	8.339	30.825
NM_010828	Cited2	0.621	3.854	-1.139	5.15	2.195	30.33	1.476	14.612	40.556	24.81	25.51	110.978	228.698
NM_011121	Plk1	-0.548	3.482	-0.069	0.091	1.311	25.076	0.809	5.112	31.071	42.894	22.727	53.608	52.477
NM_009004	Kif20a	-0.56	8.443	-0.206	0.492	1.284	24.557	0.317	2.143	24.83	34.456	13.113	30.393	32.71
NM_026785	Ube2c	-0.212	1.277	0.176	0.361	1.189	21.817	0.535	4.242	129.718	141.416	85.287	184.852	152.918
NM_009689	Birc5	-0.439	2.257	0.232	0.65	1.534	21.199	0.304	0.869	52.349	66.903	23.174	63.607	50.603
NM_134471	Kif2c	-0.202	1.34	-0.226	0.684	1.199	20.604	0.61	7.273	21.733	23.528	14.98	32.558	35.596
NM_008252	Hmgb2	0.051	0.202	0.278	0.74	1.346	20.373	-0.066	0.162	224.476	203.599	87.186	210.848	162.163
NM_008972	Ptma	0.633	9.017	-0.448	1.117	1.144	20.202	-0.084	0.231	3144.56	1898.16	1387.59	2911.39	3717.17
NM_001199124	Spc25	-0.123	0.522	0.744	4.229	1.382	19.664	0.087	0.254	44.944	46.034	18.989	46.876	26.191
NM_011369	Shcbp1	-0.276	2.622	0.051	0.051	1.489	19.054	0.158	0.56	19.824	22.582	8.187	21.728	19.609
NM_001291185	Aurka	-0.484	2.273	-0.327	1.031	1.194	18.639	0.49	1.945	21.091	27.886	13.444	29.12	34.176
NM_026412	Knstrn	-0.08	0.371	0.172	0.423	1.269	17.92	0.7	9.784	21.82	21.696	15.25	34.825	28.865
NM_144799	Lmcd1	0.32	1.138	0.005	0.001	2.811	17.835	0.09	0.094	6.252	4.702	0.975	6.535	6.018
NM_009773	Bub1b	-0.132	0.718	-0.578	3.507	1.194	17.567	-0.283	1.849	38.741	39.934	14.446	31.257	43.631
NM_009103	Rrm1	0.079	0.508	-0.153	0.214	1.103	17.064	0.115	0.435	80.693	71.766	42.141	85.853	89.195
NM_153544	BC030867	-0.148	0.323	-0.571	2.075	1.361	16.127	0.589	2.96	5.443	5.686	3.295	8.047	11.184
NM_010790	Melk	-0.155	1.093	-0.117	0.232	1.44	15.985	0.262	1.686	16.159	16.92	7.41	19.039	19.291
NM_008021	Foxm1	-0.655	8.84	-0.024	0.024	1.085	15.968	0.615	5.692	17.817	26.442	13.33	26.843	25.458
NM_001141978	Tpx2	-0.208	1.028	-0.086	0.072	1.396	15.952	0.498	2.873	15.722	17.11	8.741	21.826	21.654
NM_013552	Hmmr	-0.266	2.056	0.161	0.183	1.407	15.819	0.893	11.443	18.544	21.015	13.484	33.851	28.317
NM_021886	Cenph	0.269	1.404	-0.29	0.524	1.518	15.595	0.088	0.152	23.105	18.053	8.884	24.175	27.536
NM_144553	Dlgap5	-0.103	0.411	-0.007	0.006	1.255	15.4	0.611	5.232	18.296	18.502	12.146	27.485	25.757
NM_177752	Eme1	0.339	1.271	-0.374	1.124	1.508	15.228	0.203	0.451	9.663	7.208	4.052	10.94	13.234
NM_013538	Cdca3	0.033	0.051	0.071	0.06	1.305	15.207	0.564	2.615	37.19	34.357	23.041	54.151	47.974
NM_029639	Plet1	0.033	0.021	-1.663	1.66	2.021	15.09	2.476	25.059	1.679	1.525	2.366	9.187	27.371
NM_008446	Kif4	-0.28	2.815	-0.182	0.358	1.306	15.086	0.593	7.153	14.547	16.622	9.222	21.57	22.872
NM_023294	Ndc80	-0.112	0.44	-0.017	0.016	1.278	14.913	-0.03	0.069	19.863	20.199	8.323	19.114	18.078
NM_027290	Mcm10	0.178	0.719	-0.538	4.148	1.403	14.51	0.019	0.033	14.523	12.09	5.775	14.455	19.622
NM_021288	Tyms	-0.154	0.837	0.078	0.089	1.212	14.195	-0.237	1.152	26.605	27.849	10.034	22.173	19.62
NM_013787	Skp2	-0.22	1.414	-0.378	1.462	1.059	14.188	-0.056	0.138	28.696	31.474	13.746	27.103	32.986
NM_133775	Il33	-0.474	2.524	4.588	34.464	1.835	13.994	1.382	8.474	22.337	29.154	16.808	57.222	2.22
NM_016692	Incenp	-0.307	1.744	-0.063	0.046	1.425	13.987	0.416	1.389	38.997	45.481	20.078	51.245	49.924
NM_008449	Kif5c	1.792	32.857	-1.645	46.18	1.31	13.98	1.649	61.579	4.991	1.346	6.569	15.365	44.9
NM_001080132	Tmpo	0.086	0.092	0.205	0.242	1.318	13.954	0.733	3.631	3.318	2.924	2.291	5.42	4.404
NM_028716	Phf19	2.314	162.141	2.122	11.628	1.318	13.945	-1.389	27.983	26.418	4.983	4.188	9.899	2.141
NM_001113204	Ncam1	1.179	21.427	-0.512	0.578	1.503	13.909	-0.248	0.908	7.365	3.048	2.274	6.096	8.156
NM_001293624	Hmgb3	0.634	15.28	-0.096	0.137	1.059	13.907	-0.357	3.098	105.424	63.717	40.963	80.811	80.73
NM_011132	Pole	-0.128	0.825	-0.225	0.539	1.443	13.671	-0.112	0.357	13.537	13.917	4.78	12.308	13.438
NM_008921	Prim1	0.112	0.528	-0.036	0.033	1.235	13.651	-0.166	0.814	35.238	30.652	13.84	30.807	29.588
NM_028232	Sgo1	-0.117	0.264	-0.004	0.003	1.313	13.624	0.459	2.342	10.874	11.128	6.249	14.68	13.787
NM_001355159	Nuf2	-0.386	3.51	0.198	0.305	1.442	13.595	0.502	2.77	15.598	19.142	8.449	21.714	17.678
NM_144818	Ncaph	-0.294	3.027	-0.1	0.152	1.127	13.554	0.197	1.141	27.712	31.977	15.094	31.211	31.297
NM_010615	Kif11	-0.148	0.942	0.145	0.178	1.414	13.429	0.217	1.563	32.864	34.25	14.927	37.518	31.771
NM_026560	Cdca8	-0.264	1.301	-0.212	0.596	1.087	13.33	0.089	0.185	42.574	48.179	22.065	44.48	48.224
NM_009828	Ccna2	-0.629	14.117	0.377	2.173	1.405	13.23	0.487	4.973	47.776	69.444	26.302	65.726	47.276
NM_025995	Fbxo5	-0.063	0.072	0.146	0.273	1.516	13.16	-0.111	0.136	23.69	23.401	7.992	21.571	18.227
NM_011623	Top2a	-0.158	1.261	-0.064	0.071	1.322	13.133	0.132	0.948	112.062	117.594	51.082	120.525	117.984
NM_001301412	Smc2	-0.268	1.526	-0.083	0.108	1.197	12.981	0.365	2.399	24.595	27.901	14.35	31.132	30.793
NM_010093	E2f3	0.467	3.835	-0.561	4.095	1.061	12.897	-0.219	0.731	14.924	10.157	6.345	12.575	17.36
NM_009104	Rrm2	0.167	1.338	-0.258	0.413	1.446	12.791	0.177	0.631	82.218	68.81	35.441	91.176	101.875
NM_024184	Asf1b	-0.624	4.171	-0.084	0.105	1.251	12.659	0.359	1.274	12.016	17.467	6.71	15.137	15
NM_144552	Stxbp6	0.593	3.927	0.35	0.212	1.759	12.659	-0.411	1.651	15.445	9.591	3.575	11.378	8.403
NM_172913	Tox3	0.93	11.184	-0.581	0.613	1.654	12.623	-0.21	0.536	6.857	3.382	1.955	5.823	8.179
NM_028390	Anln	-0.61	12.939	0.104	0.16	1.187	12.418	0.734	15.256	20.175	28.976	15.322	32.939	28.674
NM_010715	Lig1	-0.106	0.518	0.11	0.099	1.075	12.391	-0.181	0.693	49.561	50.14	21.458	42.986	37.083
NM_001282943	Ccne2	-0.17	0.326	0.252	0.211	1.841	12.301	0.077	0.088	9.261	9.745	2.827	9.583	7.492
NM_031182	Tfap4	0.711	9.767	-0.368	0.892	1.112	12.293	-1.279	22.356	22.905	13.141	4.512	9.268	11.192
NM_011654	Tuba1b	-0.273	2.164	-0.045	0.025	1.453	12.241	0.322	0.784	712.388	810.399	335.908	877.542	844.128
NM_030159	Troap	-0.192	0.43	-0.047	0.047	1.008	12.165	0.883	5.939	9.162	9.88	8.7	16.611	16.019
NM_199007	Sgo2a	-0.344	1.533	0.126	0.15	1.205	12.137	0.711	5.151	6.235	7.463	4.586	10.023	8.581
NM_013726	Dbf4	-0.108	0.345	-0.267	0.654	1.057	12.133	0.788	9.651	21.247	21.589	18.317	36.056	40.617
NM_011634	Traip	-0.069	0.091	-0.45	1.444	1.21	11.978	0.09	0.131	6.721	6.671	3.205	7.03	8.989
NM_029835	Ticrr	-0.147	0.466	-0.208	0.29	1.571	11.948	0.295	0.812	7.268	7.587	3.12	8.772	9.461
NM_027411	Spdl1	0.086	0.16	-0.133	0.145	1.4	11.895	0.499	2.014	12.569	11.19	7	17.48	17.911
NM_028131	Cenpn	-0.411	3.66	0.079	0.094	1.281	11.879	0.034	0.059	15.198	19.018	6.654	15.296	13.518
NM_009764	Brca1	0.276	3.067	-0.145	0.227	1.322	11.875	-0.017	0.032	12.044	9.349	4.937	11.695	12.083
NM_146208	Neil3	-0.265	1.043	0.116	0.089	1.711	11.846	0.353	1.283	9.493	10.765	3.856	11.926	10.298
NM_001040435	Tacc3	-0.334	4.1	-0.236	0.534	1.112	11.737	0.119	0.372	30.457	36.115	15.892	32.462	35.764
NM_008922	Prim2	-0.121	0.513	0.067	0.066	1.079	11.697	0.433	2.645	18.165	18.56	12.036	24.107	21.496
NM_011045	Pcna	0.058	0.233	-0.193	0.517	1.027	11.515	-0.313	2.405	225.416	203.436	92.092	178.096	190.539
NM_010620	Kif15	0.108	0.559	-0.165	0.226	1.645	11.512	-0.04	0.07	23.5	20.52	7.608	22.452	23.498
NM_019499	Mad2l1	-0.278	1.756	0.379	1.101	1.275	11.496	0.209	0.817	18.967	21.652	9.415	21.533	15.497
NM_026515	Pclaf	0.013	0.032	-0.25	0.577	1.515	11.494	-0.211	0.829	71.155	66.141	22.393	60.221	67.108
NM_007633	Ccne1	-0.624	3.97	-0.517	3.229	1.324	11.397	-0.027	0.034	21.489	31.244	8.705	20.753	27.757
NM_010288	Gja1	0.307	2.016	-1.363	22.482	1.105	11.388	0.825	12.858	76.93	58.28	65.826	133.631	321.095
NM_008652	Mybl2	-0.396	2.542	0.209	0.207	1.323	11.271	-0.15	0.426	8.78	10.897	3.279	7.768	6.258
NM_009171	Shmt1	0.678	9.082	-0.541	1.294	1.299	11.271	-0.916	9.029	26.946	15.793	6.004	13.999	19.142
NM_019438	Ncapg	-0.253	1.551	-0.186	0.288	1.307	11.18	0.275	1.555	18.613	20.917	9.479	22.097	23.563
NM_001253808	Racgap1	-0.274	2.076	0.167	0.355	1.123	11.162	0.13	0.46	32.929	37.403	17.2	35.391	29.432
NM_010931	Uhrf1	0.327	3.399	0.102	0.168	1.382	10.984	-0.445	3.531	61.91	46.387	18.065	44.716	38.871
NM_007691	Chek1	0.227	1.489	-0.089	0.107	1.227	10.977	-0.364	2.089	14.392	11.55	4.961	10.981	10.92
NM_145924	Cenpi	0.063	0.116	-0.223	0.378	1.487	10.954	0.841	10.224	4.551	4.11	3.029	8.001	8.755
NM_001113179	Bub1	-0.224	2.38	-0.218	0.454	1.301	10.929	0.371	3.485	18.448	20.256	10.081	23.42	25.494
NM_001014976	Espl1	-0.24	1.603	-0.31	0.607	1.08	10.919	0.016	0.031	8.453	9.39	4.189	8.378	9.736
NM_028039	Esco2	-0.164	0.439	0.065	0.031	1.607	10.867	0.368	1.118	10.144	10.68	4.478	12.863	11.522
NM_028083	Chaf1b	0.22	1.023	-0.328	0.94	1.369	10.807	0.192	0.53	25.839	20.88	11.784	29.037	34.028
NM_028943	Sgms2	2.171	50.263	-0.507	0.079	1.865	10.71	2.046	36.037	7.371	1.532	8.683	29.811	40.125
NM_172616	Cip2a	-0.44	3.826	-0.082	0.125	1.286	10.64	0.873	12.825	14.439	18.473	11.294	25.964	25.705
NM_007708	Cit	-0.247	1.128	-0.289	0.525	1.197	10.638	0.644	3.829	4.284	4.793	3.014	6.582	7.506
NM_029766	Dtl	0.067	0.285	-0.005	0.004	1.084	10.546	-0.413	4.093	26.324	23.651	9.678	19.427	18.179
NM_009013	Rad51ap1	-0.124	0.285	-0.009	0.005	1.539	10.298	-0.102	0.168	8.278	8.505	2.733	7.588	7.116
NM_031863	Cenpq	-0.137	0.47	0.01	0.005	1.479	10.221	0.436	1.332	17.788	18.415	8.96	23.683	21.963
NM_009862	Cdc45	0.038	0.084	-0.099	0.1	1.311	10.15	-0.082	0.152	15.862	14.517	6.263	14.74	14.718
NM_001029856	Atad5	0.237	1.274	0.118	0.14	1.214	9.919	0.192	0.638	9.67	7.733	4.942	10.849	9.345
NM_009445	Ttk	-0.147	0.559	-0.076	0.089	1.37	9.841	0.278	1.516	14.607	15.256	7.146	17.396	17.168
NM_181589	Ckap2l	-0.364	3.865	0.498	1.039	1.521	9.734	0.794	4.031	24.208	29.338	15.204	41.31	27.258
NM_010049	Dhfr	0.166	0.948	-0.218	0.543	1.374	9.668	-0.83	13.564	11.372	9.513	2.57	6.29	6.833
NM_145150	Prc1	-0.409	2.673	0.15	0.142	1.32	9.592	0.529	4.042	13.978	17.506	8.424	19.784	16.741
NM_012012	Exo1	0.239	1.213	-0.744	6.403	1.535	9.558	-0.365	1.718	8.138	6.489	2.272	6.205	9.73
NM_001355624	Mad2l1	-0.282	1.492	0.034	0.026	1.502	9.478	0.737	5.637	16.597	18.914	10.145	27.213	24.747
NM_026282	Spc24	-0.286	1.624	0.383	1.012	1.231	9.337	-0.725	4.918	32.14	36.824	8.603	19.077	13.694
NM_001360532	Wdhd1	0.072	0.17	-0.017	0.013	1.196	9.319	-0.356	1.526	15.653	14.038	5.552	12.018	11.344
NM_008949	Psmc3ip	0.373	1.736	-0.56	2.784	1.008	9.252	-0.043	0.07	18.277	13.26	9.114	17.419	23.985
NM_028128	Rfc5	-0.037	0.094	-0.082	0.105	1.107	9.251	-0.252	1.06	31.641	30.486	12.791	26.072	25.818
NM_001081117	Mki67	-0.458	6.67	0.631	1.361	1.595	9.245	0.667	2.611	56.448	72.951	30.806	88.241	53.057
NM_146235	Ercc6l	-0.227	1.048	-0.048	0.041	1.201	9.242	0.446	2.672	9.149	10.076	5.637	12.23	11.85
NM_172746	Hirip3	0.423	6.127	-0.108	0.06	1.265	9.191	-0.516	2.15	46.105	32.326	13.874	31.72	31.952
NM_001110162	Cdca2	-0.023	0.032	-0.241	0.306	1.058	9.179	-0.226	0.55	10.757	10.326	4.557	9.038	10.025
NM_019670	Diaph3	-0.513	5.952	0.148	0.252	1.196	9.155	0.509	4.27	6.649	8.922	4.297	9.3	7.825
NM_139303	Kif18a	-0.165	0.367	0.107	0.086	1.23	9.136	0.632	3.848	6.344	6.713	4.364	9.65	8.403
NM_001042527	Blm	0.214	1.379	-0.299	0.406	1.272	9.128	0.861	8.645	14.322	11.637	11.207	25.57	29.419
NM_027014	Gins1	0.125	0.341	-0.21	0.367	1.223	9.103	-0.216	0.602	20.124	17.387	7.696	17.026	18.371
NM_011037	Pax2	2.482	51.061	-1.264	2.801	1.525	9.06	-0.122	0.165	110.617	18.446	36.473	100.181	224.937
NM_172301	Ccnb1	-0.423	7.448	-0.021	0.013	1.106	9.024	0.37	1.865	48.708	61.494	30.383	61.681	58.684
NM_133851	Nusap1	-0.215	1.169	0.341	0.748	1.288	8.959	0.137	0.296	33.373	36.478	15.624	36.066	26.559
NM_001362732	Knl1	-0.073	0.127	0.151	0.111	1.351	8.955	0.649	3.52	5.232	5.173	3.346	8.035	6.798
NM_001080130	Tmpo	0.234	1.808	0.44	1.325	1.259	8.947	-1.061	14.893	12.975	10.374	2.695	6.114	4.213
NM_023209	Pbk	-0.069	0.213	-0.153	0.098	1.367	8.927	-0.173	0.334	33.347	32.864	11.904	28.963	30.318
NM_198605	Ska3	-0.295	1.279	-0.111	0.143	1.129	8.901	0.083	0.157	13.35	15.44	6.726	13.881	14.045
NM_001033484	Iqgap3	-0.512	6.864	-0.133	0.122	1.225	8.89	0.342	1.328	7.596	10.198	4.276	9.444	9.704
NM_016777	Nasp	0.661	14.584	-0.349	0.513	1.429	8.835	-0.016	0.018	111.787	66.266	42.595	108.774	129.04
NM_027182	Trip13	-0.335	2.482	-0.645	4.422	1.277	8.835	-0.265	1.034	13.878	16.484	4.962	11.332	16.562
NM_173762	Cenpe	-0.236	1.249	-0.089	0.069	1.53	8.823	0.864	5.572	18.838	20.873	12.359	33.697	33.439
NM_008613	Mns1	0.401	1.965	0.136	0.07	1.891	8.822	0.636	1.418	9.855	7.024	4.289	15.108	12.791
NM_011015	Orc1	-0.025	0.042	-0.586	2.744	1.262	8.783	0.155	0.384	4.888	4.683	2.352	5.351	7.488
NR_033764	A730017C20Rik	3.606	85.314	-1.55	8.835	1.589	8.75	-1.052	12.766	14.5	1.112	2.388	6.856	18.702
NM_001177626	Ect2	0.296	1.765	-0.119	0.109	1.129	8.714	0.263	1.015	12.312	9.398	7.021	14.469	14.742
NM_172714	Lin54	-0.145	0.211	0.004	0.002	1.134	8.697	0.934	4.421	5.44	5.679	4.919	10.202	9.528
NM_001042653	Oip5	-0.113	0.26	0.058	0.037	1.303	8.696	-0.123	0.212	10.974	11.162	4.248	9.902	8.905
NM_183191	Plch1	0.658	8.192	0.354	0.203	1.073	8.691	0.549	3.432	5.592	3.343	4.029	8.041	5.913
NM_175554	Clspn	0.137	0.59	0.185	0.145	1.57	8.665	0.406	1.082	14.607	12.511	6.769	19.061	15.58
NM_016681	Chek2	-0.022	0.036	0.118	0.115	1.109	8.642	0.254	0.995	7.584	7.245	4.356	8.875	7.672
NM_007659	Cdk1	-0.434	3.925	-0.081	0.072	1.037	8.621	0.079	0.137	26.1	33.227	13.948	27.044	26.813
NM_177331	Gen1	-0.242	0.659	-0.114	0.129	1.457	8.621	0.217	0.45	5.548	6.192	2.451	6.344	6.41
NM_146040	Cdca7l	0.316	3.858	-0.286	0.338	1.218	8.579	-1.405	38.101	20.713	15.645	3.489	7.684	8.794
NM_175563	Prr11	-0.496	4.388	0.181	0.155	1.532	8.564	0.953	5.557	16.283	21.626	11.338	30.994	25.504
NM_019671	Net1	-0.046	0.141	-0.302	0.582	1.126	8.528	-0.117	0.283	12.275	11.926	5.38	11.103	12.839
NM_024245	Kif23	-0.385	4.051	0.062	0.061	1.099	8.523	0.407	2.135	23.588	29.026	15.188	30.771	27.484
NM_172710	Sel1l3	2.545	87.127	0.109	0.101	1.271	8.519	1.887	64.088	26.212	4.199	41.853	95.063	82.699
NM_029617	Knl1	-0.168	0.72	0.099	0.086	1.4	8.477	0.54	3.233	4.211	4.46	2.417	6.017	5.248
NM_008892	Pola1	0.017	0.04	0.406	1.442	1.055	8.395	-0.466	3.593	20.031	18.603	7.251	14.238	10.047
NM_027280	Nkd1	-0.639	4.111	-3.466	3.642	1.005	8.371	-0.678	3.827	8.683	12.788	2.795	5.338	54.266
NM_001025393	Bclaf1	0.282	1.847	-0.083	0.056	1.11	8.238	-0.447	2.11	8.343	6.456	2.938	6.018	5.928
NM_133786	Smc4	-0.285	1.869	0.012	0.008	1.21	8.212	0.738	5.221	48.571	55.746	36.372	79.594	73.755
NM_007525	Bard1	0.37	3.26	0.116	0.152	1.313	8.204	0.045	0.086	6.791	4.947	2.937	6.883	5.934
NR_037145	Alg13	0.612	8.285	-0.296	0.234	1.083	8.172	0.501	3.928	10.995	6.766	7.638	15.278	17.611
NM_001346696	Mta1	0.617	2.654	-0.215	0.152	1.224	8.159	0.856	4.838	3.894	2.373	3.112	6.932	7.521
NM_001081363	Cenpf	-0.035	0.085	0.376	0.751	1.348	7.944	0.677	4.065	18.084	17.423	11.819	28.414	20.435
NM_181815	Cep128	-0.278	1.115	0.273	0.365	1.389	7.932	0.471	1.689	4.725	5.394	2.603	6.448	4.978
NM_025866	Cdca7	0.014	0.041	-0.847	5.158	1.014	7.927	-1.14	18.12	66.271	61.713	15.396	29.496	49.594
NM_172578	Mis18bp1	0	0.001	-0.046	0.033	1.552	7.923	0.444	1.76	13.808	13.01	6.681	18.447	17.809
NM_026640	Fam111a	-0.739	17.7	0.399	0.368	1.524	7.875	0.07	0.08	16.097	25.289	6.087	16.647	11.764
NM_145463	Shisa2	2.895	58.333	-1.201	2.245	1.485	7.841	-1.812	16.322	42.382	5.305	4.458	11.797	25.616
NM_183046	Kif20b	-0.216	0.8	-0.085	0.053	1.528	7.797	0.875	4.886	9.179	10.046	6.082	16.543	16.404
NM_001364623	Mta1	0.19	0.455	-0.591	0.512	1.835	7.795	-0.24	0.265	9.704	7.993	2.371	8.108	11.396
NM_001285998	Prc1	-0.228	0.998	-0.098	0.083	1.093	7.672	0.6	2.516	22.506	24.808	16.574	33.568	33.56
NM_015781	Nap1l1	0.539	9.514	-0.184	0.16	1.033	7.614	-0.058	0.091	148.519	95.942	72.12	140.51	149.015
NM_011495	Plk4	-0.17	0.928	-0.39	0.919	1.065	7.569	0.326	1.427	17.765	18.8	11.063	21.828	26.845
NM_001347455	Rad51ap1	-0.307	0.736	0.292	0.526	1.556	7.557	0.291	0.801	5.837	6.823	2.533	7.014	5.367
NM_001271725	Trim2	1.613	2.563	-1.891	5.61	2.195	7.395	0.129	0.182	5.472	1.643	1.366	5.847	20.434
NM_017407	Spag5	-0.056	0.165	-0.394	0.98	1.045	7.321	-0.129	0.328	19.808	19.426	9.126	17.759	21.867
NM_001042421	Kntc1	-0.262	2.262	0.119	0.213	1.134	7.311	0.045	0.121	9.831	11.083	4.816	9.956	8.567
NM_009457	Uba1	-0.156	0.501	-0.293	0.28	1.044	7.291	-0.311	1.057	11.494	12.006	4.658	9.12	10.459
NM_021381	Prokr1	1.327	8.714	-0.767	2.649	1.34	7.248	0.948	6.848	3.63	1.351	2.875	6.879	10.951
NM_026309	Lsm3	0.363	3.22	-0.252	0.371	1.019	7.246	0.064	0.112	80.877	59.018	42.956	83.19	92.374
NM_133762	Ncapg2	-0.262	1.276	0.253	0.629	1.021	7.237	0.279	1.365	13.5	15.19	8.397	16.063	12.625
NM_027973	Cenpu	-0.093	0.135	-0.271	0.329	1.286	7.204	0.323	0.665	4.742	4.77	2.51	5.835	6.582
NM_001356595	Ube2d3	0.215	0.118	1.92	0.55	3.57	7.197	2.195	1.568	1.333	1.058	0.533	5.968	1.47
NM_023284	Nuf2	-0.625	3.539	-0.094	0.094	1.544	7.197	0.966	10.597	6.327	9.213	4.416	12.143	12.126
NM_001355126	Ddias	0.109	0.119	-0.275	0.174	1.268	7.079	1.376	7.996	3.459	3.029	3.889	8.833	10.036
NM_001039556	Rad54b	0.286	1.062	0.142	0.11	1.387	7.061	0.317	0.895	6.504	5.04	3.226	7.975	6.751
NM_001093753	Srsf11	-0.613	2.787	-0.239	0.145	1.819	7.043	1.502	5.338	5.002	7.194	4.125	13.989	15.323
NM_009185	Stil	-0.11	0.21	-0.301	0.289	1.125	7.043	0.672	5.519	3.607	3.68	2.741	5.646	6.527
NM_181416	Arhgap11a	-0.075	0.284	0.209	0.244	1.088	6.991	0.625	4.69	17.249	17.12	13.022	26.164	21.174
NM_020567	Gmnn	0.18	0.652	-0.152	0.268	1.055	6.94	-0.296	1.06	37.23	30.919	15.082	29.774	30.976
NM_019567	Acin1	1.012	18.065	-0.409	1.086	1.003	6.928	-0.729	8.69	21.332	9.959	6.63	12.632	15.672
NM_028293	Cep55	-0.253	0.542	-0.396	0.667	1.397	6.928	1.255	7.87	5.535	6.239	5.208	12.966	15.935
NM_029249	Parpbp	-0.462	2.646	0.284	0.663	1.116	6.85	0.741	6.413	4.245	5.521	3.411	6.963	5.359
NM_009226	Snrpd1	0.434	9.371	-0.139	0.124	1.012	6.847	-0.084	0.139	166.142	115.577	80.292	154.305	158.396
NM_027435	Atad2	-0.146	1.119	0.52	1.74	1.283	6.741	-0.067	0.144	32.435	33.754	13.25	30.42	19.823
NM_133721	Itga9	-1.733	82.667	0.066	0.035	1.042	6.661	0.003	0.003	22.452	70.07	11.357	22.075	19.646
NM_175265	Bora	-0.097	0.378	-0.323	0.454	1.098	6.607	0.025	0.039	14.875	14.985	7.342	14.874	17.29
NM_008234	Hells	0.05	0.134	-0.04	0.03	1.279	6.59	0.028	0.036	33.107	30.071	14.464	33.149	31.775
NM_001111079	Uhrf1	0.068	0.13	0.392	1.005	1.543	6.557	-0.427	1.515	9.911	8.876	2.619	7.246	5.154
NM_025642	Mis18a	-0.117	0.336	-0.499	0.689	1.027	6.462	0.469	1.775	15.182	15.464	10.688	20.594	27.403
NM_001287179	Kif14	-0.392	2.117	0.448	1.092	1.07	6.396	1.058	13.694	4.271	5.29	4.41	8.738	6.001
NM_029797	Mnd1	0.285	0.845	-0.168	0.168	1.383	6.395	-0.183	0.37	12.357	9.522	4.335	10.689	11.242
NM_001356424	Usp1	0.044	0.045	0.248	0.082	2.702	6.353	1.03	1.433	7.62	6.926	2.475	15.356	12.006
NM_030234	Wdr76	0.656	9.403	0.171	0.144	1.223	6.26	-0.267	0.857	10.476	6.258	3.886	8.556	7.111
NM_001141976	Tpx2	-0.236	0.511	0.353	0.28	1.656	6.21	1.04	2.879	4.088	4.501	2.756	8.282	6.023
NM_173400	Haus6	0.314	2.774	-0.385	0.906	1.035	6.21	0.229	1.043	13.13	9.949	7.819	15.106	18.467
NM_001324556	Tipin	0.229	0.581	0.421	0.517	1.148	6.198	-0.281	0.723	10.898	8.705	4.193	8.81	6.176
NM_198654	Nsl1	-0.121	0.233	-0.171	0.175	1.072	6.176	-0.439	1.238	10.155	10.439	3.7	7.345	7.767
NM_011239	Ranbp1	0.417	4.321	-0.264	0.223	1.227	6.161	0.341	0.702	296.473	208.598	165.451	370.467	413.753
NM_010439	Hmgb1	0.024	0.08	0.135	0.129	1.013	6.159	0.194	0.475	371.664	342.846	218.524	417.899	354.773
NM_001360812	E2f8	-0.103	0.251	0.642	0.597	1.676	6.072	0.798	1.903	7.67	7.74	4.332	13.159	7.857
NM_009416	Tpm2	2.432	32.065	0.449	0.214	1.624	6.006	0.072	0.054	23.047	3.992	8.129	23.81	16.304
NM_007900	Ect2	-0.645	4.811	0.063	0.042	1.377	5.959	0.468	1.873	7.437	10.968	4.14	10.108	9.059
NM_026410	Cdca5	0.098	0.207	-0.34	0.614	1.245	5.958	-0.6	2.544	17.236	15.164	4.996	11.161	13.261
NM_025900	Dek	0.034	0.097	0.085	0.072	1.047	5.927	-0.28	0.802	131.904	120.884	54.561	106.701	93.844
NM_001291768	Tfdp1	0.154	0.232	0.29	0.356	1.263	5.924	0.189	0.484	5.899	4.97	2.9	6.598	5.067
NM_001025779	Cdc6	-0.026	0.037	0.028	0.011	1.293	5.915	-0.481	1.655	7.688	7.384	2.336	5.42	4.927
NM_011234	Rad51	-0.08	0.235	-0.182	0.291	1.104	5.817	-1.034	12.272	16.72	16.593	3.937	8.01	8.506
NR_024720	2700099C18Rik	0.089	0.145	0.054	0.044	1.212	5.816	-0.166	0.37	10.032	8.899	4.024	8.781	7.92
NM_001252261	Npm1	0.648	11.806	-0.484	0.37	1.619	5.802	0.526	0.913	207.201	123.783	99.725	294.074	381.655
NM_001278220	Disp1	3.483	17.015	0.105	0.052	1.279	5.768	0.949	4.015	4.891	0.4	4.019	9.301	8.057
NM_011496	Aurkb	-0.556	6.08	-0.187	0.193	1.025	5.764	-0.01	0.012	29.162	40.366	14.737	28.378	30.327
NM_148917	Pabpc4	1.217	6.638	0.233	0.064	2.389	5.761	1.098	0.85	7.819	3.137	3.294	16.516	13.07
NM_001172093	Depdc1a	-1.236	15.632	0.85	4.249	1.262	5.743	0.651	3.03	6.183	13.733	4.217	9.537	4.93
NM_178609	E2f7	-0.878	14.275	-0.967	2.043	1.557	5.731	0.288	0.428	4.429	7.679	1.899	5.333	9.693
NM_021385	Rad18	-0.029	0.055	-0.107	0.053	1.115	5.716	1.003	11.662	8.469	8.128	8.141	16.67	16.874
NM_001163042	Haus8	-0.087	0.189	-0.425	1.219	1.017	5.659	-0.009	0.012	10.199	10.16	5.156	9.948	12.492
NM_025949	Rps6ka6	0.345	1.524	-0.763	2.189	1.229	5.643	-0.211	0.64	9.936	7.316	3.82	8.403	13.4
NM_026507	Zwilch	-0.096	0.388	-0.079	0.088	1.184	5.624	-0.287	1.615	15.107	15.209	5.682	12.15	12.013
NM_027261	Taf1d	0.453	2.445	-0.16	0.133	1.019	5.619	0.707	3.352	19.755	13.597	16.504	31.691	33.087
NM_001358255	2610318N02Rik	0.943	8.387	0.108	0.079	1.218	5.572	0.409	1.04	15.18	7.424	8.89	19.847	17.123
NM_001356976	Smc4	-0.369	0.948	0.379	0.643	1.158	5.529	0.801	3.063	10.218	12.332	8.296	17.435	12.55
NM_001356594	Ube2d3	-0.235	0.645	1.206	0.894	2.498	5.522	1.372	2.204	3.147	3.487	1.498	8.06	3.249
NM_001010833	Mdc1	-0.039	0.139	0.409	0.514	1.207	5.514	0.354	0.765	19.126	18.484	10.972	24.065	16.863
NM_008017	Smc2	-0.628	4.8	0.088	0.049	1.517	5.403	0.889	3.28	10.716	15.538	7.223	19.481	17.098
NM_175384	Cdca2	-0.393	0.745	0.082	0.079	1.424	5.315	1.257	6.176	4.104	5.073	3.816	9.593	8.45
NM_001141975	Tpx2	-0.535	3.27	-0.12	0.122	1.243	5.299	0.449	1.676	5.351	7.294	3.219	7.159	7.281
NM_001079876	Gas2l3	-0.626	5.991	-0.01	0.006	1.041	5.23	0.87	5.383	2.821	4.103	2.602	5.068	4.769
NM_009285	Stc1	1.124	9.783	-1.809	5.677	1.216	5.215	-0.1	0.105	10.319	4.436	4.268	9.458	31.004
NM_177372	Dna2	0.393	2.53	-0.144	0.122	1.27	5.183	-0.225	0.546	6.663	4.771	2.469	5.595	5.794
NM_009791	Aspm	-0.55	6.841	0.357	0.889	1.12	5.092	0.721	6.622	8.698	11.995	6.876	14.079	10.267
NM_025979	Mastl	-0.251	1.385	-0.084	0.066	1.034	5.092	0.849	10.731	5.225	5.855	4.794	9.25	9.187
NM_025495	Cenpp	-0.079	0.148	0.12	0.076	1.444	5.089	-0.273	0.555	9.408	9.35	2.983	7.627	6.6
NM_001306071	Itga3	-1.287	1.19	-0.502	0.199	2.002	5.014	4.33	24.299	0.254	0.569	1.33	5.047	6.677
NM_146159	Haus3	-0.175	0.444	-0.216	0.241	1.015	4.952	0.561	2.481	15.172	16.136	11.523	21.974	23.891
NM_172668	Lrp4	-0.239	1.196	-3.129	17.199	1.078	4.81	0.043	0.058	9.145	10.1	4.611	9.248	76.119
NR_037955	Lockd	-0.453	1.409	1.035	2.084	1.207	4.802	-0.108	0.148	10.501	13.475	4.386	9.566	4.316
NM_201364	BC055324	0.124	0.431	-0.376	0.915	1	4.8	-0.323	1.49	10.498	9.031	4.371	8.226	10.009
NM_009387	Tk1	-0.641	7.027	0.233	0.242	1.18	4.733	-0.237	0.445	30.934	45.38	11.984	25.733	20.509
NM_025281	Lyar	0.6	11.976	-0.456	0.582	1.114	4.728	0.101	0.138	60.223	37.305	30.749	63.667	81.326
NM_016710	Hmgn5	0.008	0.017	0.161	0.086	1.333	4.662	0.523	0.998	28.508	26.679	16.808	40.342	33.561
NM_001290712	Tcp1	-0.716	3.816	-0.247	0.137	1.31	4.646	0.969	3.203	7.393	11.413	6.013	14.267	15.758
NM_001284369	Atf2	0.102	0.112	-0.004	0.002	1.069	4.6	0.408	0.892	3.954	3.448	2.588	5.156	4.836
NM_001364480	Hspa8	0.119	0.181	-0.114	0.057	1.207	4.588	1.442	5.579	122.829	106.893	150.026	330.254	331.932
NM_133832	Rdh10	0.531	6.747	3.782	61.867	1.155	4.533	1.118	11.403	29.47	19.132	29.688	62.656	4.255
NM_001357288	Neto2	-0.83	10.078	-0.917	0.507	1.336	4.506	0.15	0.191	4.888	8.183	2.244	5.312	9.271
NM_001103182	Lin9	0.065	0.128	-0.007	0.003	1.077	4.433	0.636	2.392	6.767	6.083	5.187	10.344	9.711
NM_001177867	Sgo2a	-0.493	1.385	0.393	0.567	1.674	4.354	1.701	10.832	3.146	4.183	3.365	10.064	7.137
NM_001042623	Phc1	-0.321	1.076	0.612	0.461	1.669	4.33	1.775	5.712	4.605	5.395	5.101	15.554	9.421
NM_001360881	Tcerg1	0.328	1.225	-0.023	0.009	1.353	4.33	0.394	0.668	6.71	5.024	3.582	8.665	8.203
NM_009398	Tnfaip6	1.278	4.214	-0.222	0.106	1.168	4.244	2.707	30.553	4.531	1.733	13.686	28.935	31.882
NM_001363456	Fam192a	0.738	0.581	0.199	0.046	2.231	4.222	2.503	5.429	1.66	0.921	2.084	9.306	7.463
NM_001114085	Nde1	1.578	2.337	-0.283	0.123	2.191	4.178	1.259	1.865	3.301	1.069	1.771	7.824	8.81
NM_183261	Nr2f2	0.321	2.048	2.174	16.587	1.038	4.152	-0.159	0.292	28.364	21.299	12.862	24.926	5.162
NM_021498	Pole3	0.516	4.451	-0.147	0.09	1.052	4.129	0.185	0.291	49.791	32.69	28.088	55.786	57.409
NR_038009	2810408I11Rik	-0.065	0.041	0.086	0.029	1.744	4.108	1.179	2.351	2.785	2.751	1.934	6.224	5.455
NM_001199432	Dnmt1	-0.329	1.008	0.232	0.117	1.417	4.106	1.67	6.75	4.981	5.852	6.134	15.645	12.387
NM_001362617	Ewsr1	1.926	NA	2.649	0.384	7.505	4.1	9.752	13.923	0.021	0.009	0.096	15.74	2.332
NM_001110809	Gpatch4	0.557	4.581	-0.242	0.172	1.1	4.061	0.121	0.145	18.887	12.094	9.849	20.231	22.249
NM_025581	Ska1	-0.369	1.622	0.041	0.022	1.431	4.022	0.203	0.31	5.696	6.936	2.521	6.425	5.858
NM_001356401	Rnf20	-1.084	2.657	0.554	0.099	2.54	3.927	2.842	5.732	0.971	1.945	1.246	6.87	4.339
NM_001302539	Zbed3	-1.103	5.432	0.315	0.273	1.205	3.895	2.147	17.049	3.475	6.969	6.906	15.127	11.344
NM_029248	Taf1d	0.669	0.761	0.249	0.081	1.772	3.84	2.543	8.486	2.376	1.423	4.19	13.726	10.739
NM_001347634	Ybx2	-0.624	0.627	0.345	0.09	3.065	3.821	2.281	3.536	1.231	1.784	0.715	5.939	4.324
NM_182650	Hnrnpa2b1	-1.514	14.762	0.089	0.025	1.759	3.799	1.307	2.73	8.215	21.84	6.233	20.062	17.419
NM_001081490	Fbxo9	0.444	0.397	1.575	1.2	2.686	3.773	2.237	3.915	1.076	0.742	0.821	5.002	1.56
NM_183027	Ap1s3	0.532	1.408	-0.326	0.299	1.004	3.769	0.479	1.079	3.971	2.58	2.865	5.425	6.375
NM_001253700	Elp5	0.549	0.432	0.076	0.024	1.7	3.766	2.126	6.467	1.206	0.77	1.698	5.217	4.622
NM_001164259	Fgfrl1	1.221	1.036	-0.416	0.18	1.971	3.709	2.644	6.245	1.221	0.495	1.992	7.51	9.306
NR_130974	H19	0.161	0.348	-0.184	0.068	1.563	3.685	1.433	4.234	19.322	16.279	18.361	51.427	54.298
NM_139300	Mylk	-1.624	57.032	0.26	0.282	1.415	3.673	-0.251	0.65	14.252	41.211	4.654	11.766	9.157
NM_001077595	Shroom3	1.671	6.672	-1.075	1.665	1.162	3.653	0.709	1.624	3.281	0.953	2.475	5.291	10.306
NM_001301345	Hnrnpk	1.123	15.948	0.121	0.044	1.536	3.642	-0.677	1.135	9.479	4.082	2.118	5.849	4.989
NM_001081099	Aunip	0.23	0.281	-0.731	1.053	1.44	3.608	-0.292	0.382	6.449	5.192	1.997	5.17	8.084
NM_029437	Ckap5	-0.374	1.109	0.385	0.242	1.35	3.596	1.979	10.359	1.936	2.342	3.117	7.526	5.375
NM_007516	Hnrnpd	0.077	0.275	0.053	0.021	1.129	3.575	0.628	1.452	13.054	11.62	9.533	19.881	17.772
NM_001284520	Cmah	0.777	3.827	-1.494	3.024	1.544	3.573	-0.166	0.24	7.602	4.145	2.435	6.61	17.55
NM_028203	Wdr89	0.112	0.195	0.401	0.164	1.619	3.564	1.007	1.699	4.187	3.651	2.832	8.311	5.853
NM_001355414	Rif1	0.449	2.862	0.154	0.083	1.215	3.517	1.147	9.863	3.746	2.569	3.737	8.144	6.857
NM_001190161	Psrc1	0.107	0.13	0.273	0.237	1.114	3.451	1.143	7.411	6.305	5.475	6.576	13.673	10.608
NM_001361904	Ogdh	-0.817	2.515	0.157	0.082	1.116	3.44	3.368	35.006	0.498	0.822	2.448	5.043	4.209
NM_001364934	Rps10	1.793	1.411	0.143	0.016	3.549	3.426	4.106	4.374	2.659	0.714	4.053	45.303	37.982
NM_001113488	2021-09-09	0.281	1.668	-0.241	0.132	1.278	3.38	0.831	2.284	13.59	10.523	10.378	23.842	26.175
NM_001356509	Cxcr4	1.886	10.975	-1.404	1.39	1.024	3.359	0.976	3.599	4.708	1.191	4.746	9.082	22.731
NM_001357152	Crtc2	-1.236	2.275	0.665	0.285	1.901	3.284	2.939	7.921	0.662	1.49	1.415	5.027	2.922
NM_001166627	Dynlt1f	0.992	1.873	1.376	1.093	1.602	3.28	1.987	6.254	4.659	2.207	6.301	18.217	6.537
NM_001159375	Eif4a1	-0.281	0.251	0.06	0.011	2.213	3.273	3.142	7.87	0.94	1.076	1.865	8.183	7.272
NM_001329528	Gpx1	NA	NA	3.662	0.423	10.454	3.263	11.387	3.151	0	0	0.012	14.837	1.093
NM_021889	Syt9	1.79	27.272	1.284	1.845	1.208	3.259	1.458	21.099	5.136	1.391	6.322	13.836	5.359
NM_212438	Wiz	0.412	2.906	-0.143	0.086	1.048	3.236	0.973	4.02	11.69	8.27	11.532	22.598	23.222
NM_001252528	Pqbp1	0	0	0.657	0.21	2.532	3.217	2.398	4.028	3.331	3.142	3.203	17.452	10.265
NM_001271615	Fen1	-0.176	0.329	-0.553	0.787	1.104	3.175	-0.035	0.032	6.294	6.699	2.942	6.015	8.294
NM_001302765	Ldhb	-0.063	0.028	-0.209	0.05	1.073	3.166	1.422	2.099	2.565	2.525	3.377	6.765	7.366
NM_001362526	Hnrnph1	-1.549	7.412	0.516	0.304	1.57	3.153	3.509	16.987	4.046	11.037	16.086	45.321	29.396
NM_001297747	Btg3	0.265	0.086	0.421	0.129	1.735	3.143	1.761	1.91	2.846	2.189	3.011	9.376	6.593
NM_001172092	Depdc1a	-0.209	0.525	-0.241	0.259	1.42	3.129	0.189	0.431	4.885	5.331	2.189	5.464	6.054
NM_001362525	Hnrnph1	-1.549	7.168	0.517	0.304	1.57	3.125	3.51	16.8	3.449	9.415	13.721	38.661	25.069
NM_031878	Smarcd2	0.279	0.865	0.584	0.469	1.435	3.109	1.985	10.705	5.972	4.623	9.142	23.304	14.453
NM_001146027	Rnf44	0.843	1.302	0.043	0.014	1.185	3.097	0.892	2.078	3.502	1.793	2.96	6.379	5.784
NM_001130149	Drosha	-0.933	5.039	-0.421	0.478	1.045	3.096	2.359	15.206	1.298	2.338	3.352	6.573	8.175
NM_153164	Cnot1	0.089	0.126	0.234	0.123	1.075	3.091	1.845	9.217	3.739	3.289	6.593	13.228	10.479
NM_009278	Ssb	0.018	0.021	0.304	0.104	1.816	3.051	1.487	2.428	7.062	6.588	5.809	19.576	14.687
NM_011040	Pax8	1.398	15.57	-0.084	0.01	1.363	3.044	0.575	1.457	43.525	15.432	26.035	63.788	63.864
NR_157095	Hspb6	-0.384	0.135	0.899	0.485	2.019	3.02	3.6	6.848	0.746	0.899	2.311	8.974	4.463
NM_026573	Upf3b	0.581	7.707	0.057	0.025	1.004	2.936	0.019	0.017	22.423	14.092	11.742	22.357	20.016
NM_001359024	Cherp	0.017	0.029	-0.101	0.047	1.051	2.929	1.019	3.57	6.635	6.169	6.686	13.256	13.19
NM_001313920	Hif1a	-0.295	1.015	1.009	0.725	1.637	2.897	1.128	1.903	6.198	7.164	4.519	13.347	6.165
NM_146024	Ankrd40	0.513	0.448	0.374	0.115	1.858	2.87	2.837	7.465	1.068	0.696	2.144	7.527	5.362
NM_001355195	Cnbp	0.089	0.091	0.565	0.588	1.423	2.832	0.49	1.216	3.843	3.388	2.101	5.3	3.36
NM_001362561	Cbx1	0.834	1.806	-0.276	0.12	1.414	2.79	0.815	1.213	6.625	3.466	4.536	11.538	12.928
NM_028109	Tpx2	-0.398	1.577	-0.299	0.273	1.021	2.747	0.544	1.554	5.425	6.753	4.05	7.761	8.926
NM_001159483	Rpl19	0.782	1.175	0.59	0.265	1.592	2.735	1.799	4.013	7.056	3.835	8.369	24.276	14.985
NM_001360336	Ldb1	0.825	5.672	0.652	0.312	1.6	2.71	1.891	5.07	7.922	4.198	10.138	29.088	17.215
NM_001302538	Zbed3	-3.471	6.378	0.691	0.32	1.832	2.703	5.504	6.844	0.287	2.998	3.883	13.064	7.512
NM_178788	Dctd	-0.234	0.642	-0.717	1.046	1.169	2.676	-1.4	14.954	14.121	15.636	2.495	5.267	8.114
NM_178405	Atp1a2	0.884	4.282	3.388	9.109	1.008	2.642	2.493	25.858	1.915	0.974	5.532	10.555	0.955
NM_001177628	Slc45a3	2.973	29.628	0.074	0.018	1.24	2.631	-0.021	0.015	10.682	1.26	4.599	10.276	9.276
NM_178185	Hist1h2ap	-3.738	1.631	1.826	0.22	10.83	2.592	7.924	2.263	0.079	1.172	0.006	20.547	5.388
NM_001359152	Rbpj	0.456	1.934	0.088	0.035	1.28	2.59	1.692	15.067	2.121	1.453	2.96	6.738	5.939
NM_178185.1	Hist1h2ap	NA	NA	2.112	0.174	10.797	2.587	10.767	2.995	0	0	0.006	20.107	4.312
NM_001363484	Clint1	0.27	0.223	0.227	0.099	1.588	2.577	2.529	12.46	1.678	1.298	3.377	9.543	7.59
NM_001310725	Kmt5a	0.005	0.003	0.192	0.069	1.636	2.573	1.732	4.981	4.441	4.155	4.997	14.558	11.911
NM_001285892	Sae1	-0.698	1.115	0.045	0.016	1.028	2.549	2.452	16.701	1.231	1.874	3.377	6.617	5.957
NM_001166627.1	Dynlt1f	0.816	1.84	0.863	0.623	1.289	2.538	1.03	2.239	8.042	4.299	6.861	16.166	8.309
NM_027418	Mapk6	-0.805	0.974	-0.615	0.479	1.272	2.5	4.214	24.633	0.582	0.969	4.697	10.708	15.287
NM_001326590	Tpst2	-0.818	0.322	1.155	0.491	2.176	2.483	4.107	7.657	0.402	0.651	1.565	6.745	2.815
NM_001324476	Smc6	0.094	0.161	0.955	1.198	1.129	2.474	1.669	6.163	2.203	1.937	3.299	6.916	3.319
NM_001025388.1	Eno1b	-3.149	NA	0.11	0.012	3.433	2.45	11.883	8.293	0.004	0.027	1.165	11.919	10.189
NM_001163395	Evl	-0.655	0.721	0.318	0.124	1.525	2.446	1.587	2.164	2.791	4.09	2.999	8.256	6.131
NM_001284258	Ryk	0.717	0.785	0.969	0.996	1.198	2.435	2.998	9.784	1.511	0.858	5.405	11.868	5.631
NM_183020	Atxn2l	-0.22	0.592	-0.046	0.016	1.004	2.384	2.046	10.44	10.691	11.768	22.749	43.672	41.995
NM_001111063	Comt	4.276	34.14	-0.299	0.122	1.276	2.335	2.526	11.305	791.432	37.798	1952.81	4479.52	5126.2
NM_001363485	Dnaaf5	0.259	0.296	0.164	0.035	2.002	2.335	1.377	1.41	2.062	1.622	1.372	5.307	4.39
NM_001302481	Acy3	1.367	0.468	1.37	2.065	1.958	2.319	3.571	7.235	0.71	0.247	2.298	8.289	2.996
NM_180960	Nnat	0.986	3.804	0.622	0.257	1.771	2.308	0.672	0.31	15.763	7.502	7.535	24.806	14.883
NM_001271591	Rpl37rt	0.867	1.362	0.958	0.31	2.464	2.277	2.072	3.477	4.246	2.182	3.293	17.709	8.461
NM_146095	Rorb	3.6	63.444	-0.562	0.412	1.171	2.253	2.903	17.582	7.925	0.607	27.336	58.246	79.7
NM_001358257	1810055G02Rik	-0.58	0.101	0.915	0.147	3.456	2.241	7.829	9.303	0.05	0.064	1.008	10.531	5.172
NM_001289921	Rorb	3.603	59.159	-0.564	0.412	1.17	2.239	2.903	17.417	5.862	0.449	20.229	43.066	58.997
NM_001166428	Hnrnpf	-1.447	1.658	0.76	0.318	2.005	2.218	4.575	13.746	0.238	0.608	1.507	5.685	3.107
NM_001324558	Tipin	0.157	0.198	0.522	0.441	1.193	2.213	0.423	0.798	4.232	3.549	2.574	5.589	3.644
NM_001283013	Ptbp1	-0.739	1.328	1.259	0.213	3.606	2.169	4.327	3.619	0.737	1.15	1.269	14.717	5.7
NM_175201	Rnf38	0.687	1.265	0.181	0.07	1.03	2.168	0.974	2.225	2.808	1.626	2.821	5.398	4.478
NM_024201	Ccdc127	-0.321	0.263	0.36	0.206	1.161	2.166	3.439	20.093	0.477	0.561	2.414	5.11	3.698
NM_001168230	Morf4l2	-0.926	0.525	1.446	0.336	3.475	2.137	6.101	6.969	0.394	0.696	2.521	26.581	9.03
NM_001141931	Rbms1	-0.7	0.975	0.466	0.312	1.139	2.13	3.229	13.216	1.561	2.371	6.888	14.463	9.729
NM_001363070	Arid1a	0.131	0.997	0.425	0.234	1.094	2.101	1.024	2.341	27.811	23.863	27.423	55.804	38.636
NM_001359289	Gripap1	0.282	0.509	0.93	0.57	1.463	2.085	2.186	5.127	1.318	1.021	2.245	5.928	2.881
NM_026611.1	Rnaset2b	-0.267	0.098	1.619	0.326	3.623	2.079	4.257	2.88	0.619	0.706	0.979	11.6	3.5
NM_001114097	Smarcc2	0.316	2.134	-0.047	0.016	1.099	2.076	0.659	1.091	11.021	8.347	8.45	17.198	16.469
NM_001271590	Rpl37rt	-0.419	0.065	0.664	0.146	2.893	2.067	4.125	2.23	0.648	0.79	1.516	11.014	6.438
NM_001038993	Rnf38	0.276	0.186	0.605	0.36	1.428	1.995	1.57	1.18	2.038	1.559	2.316	5.907	3.608
NM_001361573	Luc7l3	0.125	0.197	-0.132	0.058	1.092	1.991	0.493	0.645	5.562	4.774	3.812	7.734	7.854
NM_007915	Ei24	-0.491	1.201	0.492	0.308	1.141	1.979	2.554	12.208	3.282	4.349	9.05	18.968	12.566
NR_153396	Mphosph8	0.618	0.615	0.697	0.134	2.814	1.971	3.368	3.015	0.678	0.419	1.027	6.972	3.988
NM_007744	Comt	1.527	38.715	-0.349	0.177	1.02	1.954	2.006	9.69	46.612	15.155	95.799	184.286	218.539
NM_001283048	Tmpo	-0.706	1.756	1.87	2.072	1.847	1.93	0.596	0.753	3.771	5.805	1.671	5.596	1.437
NM_001363194	Msi2	1.134	3.621	0.637	0.492	1.206	1.916	2.023	7.579	4.038	1.708	7.411	16.076	9.652
NM_001347376	Ythdc1	-0.026	0.023	0.273	0.111	1.079	1.891	1.422	3.657	2.305	2.22	3.008	6.089	4.677
NM_011817	Gadd45g	-0.151	0.137	-2.533	25.245	1.139	1.891	0.313	0.331	10.763	11.334	6.227	13.152	71.297
NM_172444	Thsd4	1.256	9.319	0.798	0.471	1.11	1.891	1.631	4.607	6.683	2.61	9.911	20.431	10.972
NM_001276473	Cited1	5.79	3.106	5.628	1.518	4.19	1.886	5.156	3.199	0.718	0.015	1.488	25.629	0.485
NM_001284427	Smtn	-2.06	13.509	0.714	0.359	1.441	1.856	2.924	8.709	0.785	3.058	2.287	5.892	3.306
NM_001159510	Pacsin2	-1.724	3.029	1.312	2.502	1.076	1.85	5.497	45.118	0.153	0.472	3.431	6.819	2.56
NM_001168228	Morf4l2	-0.305	0.164	0.452	0.227	1.355	1.85	4.185	19.518	0.973	1.118	7.275	17.575	11.924
NM_145557	9430015G10Rik	-0.052	0.047	-0.215	0.125	1.048	1.834	0.069	0.052	5.502	5.331	2.909	5.693	6.14
NR_002445	BC002163	1.467	0.782	1.131	0.523	2.093	1.814	2.885	1.683	3.661	1.207	6.399	26.94	11.396
NM_008455	Klkb1	3.89	66.462	-0.296	0.097	1.117	1.762	1.053	2.206	8.266	0.52	8.229	16.843	19.321
NM_024183	Fip1l1	-0.064	0.113	0.161	0.055	1.091	1.737	0.894	1.486	8.956	8.773	8.024	16.408	13.643
NM_001042523	Txnrd1	0.618	0.316	0.051	0.012	1.306	1.73	3.898	12.191	0.377	0.227	2.327	5.506	4.948
NM_001079849	Paip1	-0.224	0.614	0.231	0.145	1.144	1.725	1.168	4.995	4.529	4.96	4.836	10.018	7.971
NM_001293653	Rab7	-1.297	0.805	1.105	0.242	2.466	1.702	6.422	10.645	0.153	0.348	2.473	13.077	5.637
NM_001313962	Rhoa	0.236	0.349	0.539	0.315	1.083	1.702	2.517	10.943	15.242	12.01	42.728	85.767	54.977
NM_001038610	Dach1	0.844	8.899	-1.771	9.97	1.083	1.676	-1.144	5.207	15.881	8.295	3.538	7.026	22.439
NM_001162989	Phax	-0.179	0.094	0.489	0.135	1.682	1.67	3.72	8.375	0.653	0.686	2.733	8.495	5.607
NR_002321	Tug1	0.051	0.079	0.336	0.174	1.046	1.667	0.81	1.382	10.869	9.886	9.472	18.871	13.861
NM_001357307	Ubap2l	-0.037	0.041	0.535	0.257	1.21	1.641	1.683	1.821	8.024	7.707	11.47	25.399	16.28
NM_001291481	Mdk	-0.596	2.64	0.374	0.064	2.083	1.639	2.829	3.477	30.429	42.926	52.737	214.206	152.81
NM_001024910	2021-09-10	2.066	3.522	0.522	0.263	1.371	1.621	1.118	1.486	4.151	0.957	3.543	8.932	5.761
NM_001161769	Lmo4	0.166	0.152	1.825	1.515	1.583	1.618	0.412	0.295	4.942	4.167	2.311	6.514	1.713
NM_001364415	Rbm25	0.222	0.528	0.198	0.106	1.034	1.608	-0.19	0.182	6.449	5.184	2.879	5.56	4.508
NM_017380	2021-09-09	-1.183	3.182	0.281	0.098	1.911	1.58	2.965	3.709	2.909	6.157	6.265	22.332	16.985
NM_001357955	Lrrc75a	0.61	0.546	1.145	0.24	1.519	1.53	1.878	3.124	2.647	1.613	3.563	9.563	4.057
NM_001360021	Bmp1	-1.833	9.745	0.551	0.386	1.051	1.53	3.001	13.375	1.01	3.372	4.069	8.002	5.075
NM_001177629	Grb10	-0.458	1.499	1.103	1.345	1.122	1.527	2.695	14.114	2.959	3.832	9.2	18.854	8.175
NM_019828	Trpc4ap	-0.555	1.804	0.575	0.404	1.002	1.523	1.129	2.211	2.826	3.906	3.181	6.087	3.789
NM_001163360	Fignl1	0.311	0.268	-0.043	0.012	1.062	1.521	1.224	2.589	3.516	2.704	4.132	8.135	7.831
NM_001357760	Akap8	0.132	0.087	1.208	0.249	2.765	1.517	3.817	3.806	0.694	0.601	1.51	9.683	3.888
NM_001271487	Rtn3	-0.15	0.061	1.407	0.84	2.708	1.515	4.101	4.516	0.484	0.51	1.33	8.18	2.859
NM_008749	Nucb1	-0.603	1.818	0.671	0.472	1.071	1.513	2.805	11.085	2.298	3.278	7.91	15.844	9.236
NM_001362704	Tmem127	-0.391	0.423	0.904	0.847	1.256	1.497	2.758	10.119	1.449	1.789	4.304	9.667	4.805
NM_001358491	Robo2	0.176	0.115	2.601	0.775	2.818	1.487	4.394	5.251	0.29	0.238	0.911	6.031	0.912
NM_001038231	Banf1	0.777	0.786	0.524	0.075	3.372	1.478	3.13	2.436	2.381	1.3	2.002	20.674	13.305
NM_001253862	Tcf12	-0.825	1.991	0.347	0.197	1.19	1.46	1.893	6.264	1.921	3.164	3.264	6.994	5.123
NR_002700	Gm7334	-1.225	2.087	-0.443	0.241	1.005	1.441	2.165	8.523	1.99	4.438	4.67	8.791	11.241
NM_001359863	Csnk1e	0.196	0.232	0.092	0.024	1.077	1.436	1.188	2.117	2.877	2.349	3.224	6.461	5.626
NM_001360956	Wac	0.597	1.382	1.495	0.468	2.192	1.435	2.081	1.613	1.858	1.158	1.794	7.799	2.567
NM_054048	Rcor2	2.028	8.139	0.214	0.066	1.206	1.427	0.776	1.093	7.187	1.683	5.59	12.142	9.746
NM_001048168	Nfyc	-1.736	1.091	1.447	0.386	2.507	1.419	6.041	6.14	0.13	0.415	1.561	8.567	2.906
NM_001310591	Mtss1l	-0.918	6.863	-0.119	0.033	1.879	1.403	2.314	6.296	1.836	3.273	2.607	9.029	9.101
NM_001168227	Morf4l2	0.078	0.074	0.276	0.111	1.099	1.389	1.764	4.769	5.517	4.875	9.151	18.513	14.202
NM_181650	Prdm4	-0.145	0.144	0.258	0.076	1.362	1.387	2.111	4.089	1.349	1.399	2.364	5.751	4.47
NM_001361533	Atp6v0c	-2.941	0.819	2.255	0.242	5.522	1.369	7.862	2.182	0.034	0.238	0.188	8.017	1.556
NM_001362721	Zfp207	0.158	0.171	0.534	0.194	1.477	1.342	1.144	1.381	2.396	2.008	1.995	5.231	3.363
NM_001168489	Men1	-0.639	3.448	0.371	0.149	1.047	1.321	0.952	1.345	4.946	7.242	4.785	9.453	6.771
NM_001357763	Mtch1	0.554	0.5	1.217	0.336	1.943	1.318	3.576	4.508	1.522	0.978	4.916	17.89	7.112
NM_018862	Agpat1	0.528	0.064	0.94	0.147	2.844	1.309	7.483	4.985	0.047	0.029	1.281	8.644	4.182
NM_001289726	Gapdh	1.856	0.228	3.927	0.328	9.333	1.303	7.665	1.793	0.105	0.028	0.035	22.183	1.351
NM_001357762	Mtch1	0.675	0.954	1.046	0.742	1.16	1.302	2.732	7.575	3.417	2.012	10.571	22.33	10.003

## Sheet: 3-2 1.25-0 down
TranscriptID	GeneSymbol	log2Fc.1	nlog10P.1	log2Fc.2	nlog10P.2	log2Fc.3	nlog10P.3	log2Fc.4	nlog10P.4	meanTPM.NPC	meanTPM.NFC	meanTPM.NPC_0uM	meanTPM.NPC_1.25uM	meanTPM.NPC_5uM
NM_029357	Pcdh1	-3.631	23.653	2.9	20.353	-2.531	54.692	3.242	20.763	0.262	3.086	14.782	2.442	0.302
NM_001013753	Pcdh17	-1.946	11.769	3.353	13.689	-3.829	40.003	0.72	1.145	0.584	2.143	14.1	0.948	0.087
NM_001204202	Spp1	-4.921	0.804	2.598	2.802	-2.326	38.797	10.439	15.574	0	0.097	25.621	4.858	0.766
NM_011526	Tagln	-0.74	0.888	-0.026	0.004	-2.8	38.371	-0.927	4.939	5.039	8.088	18.946	2.6	2.425
NM_172118	Myl9	-1.874	86.456	3.074	5.475	-2.479	38.08	-1.746	27.021	31.803	109.909	54.421	9.326	1.012
NM_001201413	Apbb2	-1.393	20.925	0.911	7.266	-1.481	33.895	0.934	9.469	1.978	4.912	10.917	3.715	1.846
NM_010516	Cyr61	-1.558	66.127	0.481	0.165	-1.435	31.98	-3.146	158.202	178.929	496.893	56.482	19.879	13.11
NM_021704	Cxcl12	-2.184	55.402	3.657	5.484	-1.395	27.88	-0.877	5.926	25.587	109.15	38.028	13.702	0.993
NM_022018	Fam129a	-0.603	1.167	0.841	2.511	-1.554	26.49	3.617	84.596	0.757	1.089	28.331	9.166	4.789
NM_009263	Spp1	-1.053	0.628	2.478	10.088	-2.81	24.989	7.795	93.727	0.24	0.475	376.144	51.315	8.653
NM_009502	Vcl	-0.899	30.675	0.783	7.187	-1.088	22.625	1.189	28.866	22.096	38.707	110.648	49.458	26.801
NM_023719	Txnip	-0.068	0.113	1.018	3.818	-1.557	22.392	-1.612	17.281	14.602	14.435	14.525	4.687	2.153
NM_028149	Fbxl20	0.574	4.868	0.431	2.222	-1.045	22.307	-0.991	12.719	8.741	5.504	9.376	4.311	2.988
NM_001012477	Cxcl12	-1.358	31.939	3.456	1.422	-1.535	22.079	0.097	0.196	6.826	16.466	21.928	7.16	0.596
NM_007725	Cnn2	-1.964	155.613	1.028	1.051	-1.545	21.576	0.325	1.477	43.468	159.771	164.05	53.423	24.278
NM_010217	Ctgf	-2.142	28.864	1.812	1.17	-1.767	20.512	-0.131	0.173	5.423	22.424	17.422	4.878	1.27
NM_133186	Steap3	-1.867	10.368	3.46	63.704	-1.457	20.512	4.805	140.609	0.518	1.773	41.187	14.283	1.215
NM_009643	Ahnak	-2.446	167.103	0.218	0.082	-1.252	19.528	0.953	15.14	2.753	14.114	13.155	5.232	4.161
NM_144551	Trib2	-0.558	4.921	0.285	0.152	-1.009	18.681	1.03	10.743	18.533	25.709	78.86	37.178	28.751
NM_008727	Npr1	-1.238	18.741	1.489	8.312	-1.35	18.333	0.915	8.982	2.456	5.467	12.169	4.546	1.523
NM_177378	Rnf150	-1.355	62.807	1.881	21.788	-1.518	18.287	0.322	1.074	4.486	10.789	16.614	5.518	1.394
NM_028775	Cyp2s1	-2.786	31.035	1.721	3.821	-1.986	17.723	0.238	0.202	1.686	10.947	8.122	1.963	0.561
NM_173749	Pamr1	0.27	0.3	3.791	16.044	-2.504	17.591	-0.004	0.002	1.968	1.537	11.531	1.93	0.133
NM_020332	Ank	-0.041	0.089	1.179	2.019	-1.703	17.567	1.615	63.738	12.939	12.492	132.958	38.87	16.171
NM_001363230	Sp6	3.137	1.883	-1.474	0.376	-1.813	16.963	3.899	41.938	0.342	0.038	18.507	5.006	12.764
NM_009328	Tcf15	-2.72	16.103	2.082	3.066	-2.339	16.848	1.137	1.502	0.814	5.075	9.448	1.762	0.396
NM_009890	Ch25h	-0.663	1.918	4.56	44.979	-2.153	16.274	2.61	26.913	2.339	3.476	65.449	14.05	0.553
NM_010101	S1pr3	-2.953	57.576	0.002	0.001	-2.258	15.902	-1.818	8.445	5.171	37.815	7.235	1.44	1.35
NM_178382	Flrt3	0.659	2.387	0.89	1.24	-1.056	15.78	0.889	13.007	4.433	2.66	17.681	8.06	4.031
NM_134022	6330403K07Rik	-0.631	5.357	0.959	3.042	-1.185	15.74	-0.517	2.591	26.588	38.867	43.629	18.267	8.747
NM_007670	Cdkn2b	-2.376	1.531	0.646	1.233	-1.918	15.662	7.638	50.205	0.071	0.342	52.013	13.192	7.841
NM_010730	Anxa1	-1.948	10.02	1.25	1.332	-2.164	15.629	4.12	71.075	1.053	3.857	84.683	18.123	7.045
NM_001013780	Slc25a34	2.883	7.934	3.795	19.405	-1.756	15.433	1.172	4.26	0.753	0.097	5.932	1.664	0.112
NM_026743	Tspan11	-1.97	26.407	1.512	1.059	-2.126	15.378	0.397	0.527	0.851	3.141	5.044	1.097	0.356
NM_001199556	AW551984	-0.732	8.14	4.305	51.23	-1.166	15.131	1.688	32.649	6.85	10.728	51.21	21.649	1.018
NM_010753	Mxd4	-0.455	3.448	1.196	1.302	-1.359	14.783	-1.703	26.191	29.576	38.109	24.042	8.92	3.596
NM_010473	Hrc	1.786	7.835	5.221	29.71	-1.826	14.76	-0.313	0.329	4.433	1.201	13.025	3.51	0.087
NM_023061	Mcam	0.239	0.717	1.675	4.593	-1.516	14.755	-0.01	0.014	21.207	16.911	61.756	20.644	6.084
NM_032398	Plvap	-4.161	43.555	5.673	53.35	-2.111	14.478	4.418	61.936	0.735	12.48	69.247	15.384	0.285
NM_177233	Fam19a4	-1.287	2.734	7.312	5.302	-3.27	14.213	0.815	0.583	0.433	0.99	7.666	0.74	0.004
NM_007929	Emp2	0.02	0.032	0.811	7.142	-1.053	13.595	1.634	28.849	4.84	4.484	32.098	14.721	7.846
NM_008278	Hpgd	2.209	47.695	4.472	37.683	-1.975	13.553	0.895	6.457	13.653	2.768	103.727	24.942	1.059
NM_001168333	Tinagl1	-2.3	7.811	1.707	1.717	-1.422	13.33	3.642	37.809	0.772	3.618	26.44	9.41	2.651
NM_001009935	Txnip	-0.272	1.124	1.063	6.43	-1.311	13.23	-1.12	10.887	21.869	24.911	25.707	9.887	4.443
NM_027268	Scrn1	0.734	1.182	2.495	6.976	-1.516	12.855	1.449	5.757	1.461	0.827	11.805	3.921	0.64
NR_003513	Neat1	1.728	1.774	0.954	9.213	-1.073	12.803	-0.647	0.42	28.545	8.002	39.574	17.833	8.606
NM_007621	Cbr2	1.82	0.802	3.254	20.788	-1.42	12.739	6.228	101.159	0.356	0.094	74.699	26.707	2.636
NM_026514	Cdc42ep3	-0.947	25.873	-0.46	0.145	-1.622	12.279	-2.172	48.479	13.487	24.484	9.517	2.942	3.723
NM_001166597	Dgkz	1.19	3.175	1.041	0.879	-1.922	12.22	0.324	0.35	1.302	0.533	6.337	1.598	0.717
NM_021273	Ckb	0.15	0.464	1.444	6.031	-1.549	12.175	-0.717	3.794	22.307	18.865	40.885	13.312	4.61
NM_009948	Cpt1b	1.363	3.788	0.492	0.321	-1.441	12.162	0.657	1.322	1.295	0.472	5.715	1.999	1.339
NM_001303423	Aldoc	2.263	3.105	1.271	4.537	-1.342	12.144	2.985	31.694	1.144	0.22	23.58	8.889	3.454
NM_010791	Meox1	2.705	65.897	5.181	20.359	-1.791	12.144	-3.867	75.938	35.216	5.048	8.623	2.364	0.063
NM_009604	Chrng	3.362	2.584	1.75	3.113	-1.692	12.106	2.305	7.543	0.353	0.031	5.765	1.7	0.479
NM_013470	Anxa3	-0.568	1.661	2.187	3.826	-1.279	12.035	2.433	64.644	4.577	6.411	61.853	24.237	4.911
NM_010212	Fhl2	-2.414	67.057	-0.274	0.305	-1.564	11.99	-1.012	5.167	19.891	99.722	30.038	9.689	10.945
NM_027166	Ypel5	-0.154	0.621	0.53	2.205	-1.05	11.895	0.179	0.667	10.184	10.635	24.722	11.307	7.312
NM_001289895	Tns1	-1.507	46.398	1.169	9.608	-1.094	11.301	-0.025	0.041	4.812	12.889	10.407	4.647	1.936
NM_010195	Lgr5	-1.013	5.017	1.631	2.666	-1.234	10.966	3.899	114.179	0.83	1.572	30.346	12.218	3.71
NM_010415	Hbegf	-0.98	9.21	0.091	0.06	-1.242	10.783	1.203	10.892	2.837	5.263	15.969	6.4	5.602
NM_001001738	Itprip	-0.953	14.316	-0.114	0.056	-1.288	10.258	-0.318	0.803	7.181	13.064	14.505	5.646	5.692
NM_011577	Tgfb1	-2.643	37.531	0.124	0.118	-1.359	10.134	3.501	58.448	2.044	12.018	60.852	22.73	19.453
NM_001206368	Gsn	-0.795	1.578	0.539	0.398	-1.314	10.053	0.445	0.542	1.92	3.13	6.715	2.575	1.644
NM_177340	Synpo	-0.489	0.432	1.818	7.004	-1.447	10.044	0.223	0.14	1.579	2.11	5.186	1.82	0.483
NM_001276466	Cited1	3.87	9.293	6.443	39.765	-1.477	9.813	-0.044	0.062	181.911	11.426	503.198	173.593	1.876
NM_028266	Col16a1	-2.423	104.937	0.96	1.075	-1.619	9.586	-2.431	34.502	9.04	45.643	5.293	1.644	0.784
NM_031163	Col2a1	3.421	15.512	1.759	20.121	-1.442	9.307	0.456	1.8	44.853	3.875	172.962	60.349	16.707
NM_144810	Klhdc8a	3.638	29.994	1.377	4.485	-1.404	9.235	1.48	12.648	3.384	0.251	25.716	9.242	3.354
NM_008013	Fgl2	0.001	0.001	5.597	24.68	-2.137	9.113	1.824	7.134	0.59	0.549	9.519	2.059	0.039
NM_013655	Cxcl12	-0.995	14.119	3.932	1.928	-1.073	9.113	-0.09	0.143	10.192	19.161	20.847	9.425	0.564
NM_001099299	Ajap1	3.227	64.907	1.004	0.615	-1.102	8.928	-0.872	5.64	9.542	0.955	11.57	5.132	2.351
NM_007742	Col1a1	-2.583	74.502	0.91	0.625	-1.228	8.854	-0.29	0.733	101.349	574.141	200.658	81.702	40.076
NM_001291056	Snap25	1.508	NA	2.258	4.8	-1.419	8.691	6.832	27.021	0.038	0.015	13.327	4.738	0.932
NM_009061	Rgs2	-1	9.134	3.766	40.424	-1.485	8.544	2.554	38.842	5.291	9.902	89.731	30.597	2.084
NM_175130	Trpm4	0.88	7.095	1.842	11.205	-1.329	8.541	-1.279	8.955	8.252	4.219	8.794	3.328	0.867
NM_009465	Axl	-1.312	30.878	0.586	1.478	-1.255	8.295	-0.067	0.092	18.1	42.263	42.552	16.946	10.576
NM_001077696	Hdac5	-0.325	0.86	0.384	0.457	-1.247	8.27	-0.614	2.128	4.207	4.926	6.726	2.699	1.944
NM_001324531	Rab3d	0.138	0.23	1.914	10.899	-1.051	8.241	1.012	7.173	2.155	1.841	9.302	4.262	1.054
NM_177906	Opcml	-3.288	29.392	5.365	63.111	-1.497	8.149	5.065	69.139	0.121	1.127	12.02	4.031	0.09
NM_139001	Cspg4	-1.835	32.455	0.393	0.938	-1.054	8.129	0.645	2.466	3.653	12.316	12.233	5.614	3.995
NM_177566	Arhgef15	-2.543	16.256	2.004	8.269	-1.537	8.006	2.27	12.376	0.503	2.79	7.234	2.391	0.556
NM_213616	Atp2b4	-0.273	1.145	1.165	3.453	-1.153	7.982	-0.748	3.366	4.888	5.551	6.7	2.863	1.184
NM_001305440	Spry1	-0.188	0.263	1.495	2.46	-1.055	7.899	0.915	4.259	21.113	22.418	85.083	38.968	12.822
NM_021447	Trim54	1.609	NA	1.02	0.841	-1.264	7.861	8.856	22.239	0.02	0.006	20.972	8.361	3.886
NM_008597	Mgp	-1.94	21.623	1.286	8.401	-1.283	7.613	1.07	4.801	13.786	49.595	72.396	28.484	10.882
NM_026880	Pink1	0.001	0.001	0.647	1.306	-1.013	7.476	-0.649	4.075	16.705	15.639	22.145	10.441	6.216
NM_027219	Cdc42ep1	-3.586	29.985	0.58	0.405	-1.487	7.196	1.722	6.492	0.954	10.925	9.032	3.098	1.914
NM_015763	Lpin1	-0.173	0.229	0.461	1.199	-1.042	6.765	2.295	29.413	1.21	1.283	12.589	5.84	3.959
NM_001162532	Fam174b	1.268	10.061	0.336	0.367	-1.198	6.701	-1.74	20.303	7.331	2.88	5.196	2.15	1.598
NM_011920	Abcg2	-0.456	3.611	2.926	30.928	-1.018	6.531	1.618	24.496	9.592	12.367	61.854	28.854	3.534
NM_145473	Csdc2	-0.904	9.72	1.209	7.472	-1.082	6.503	0.747	5.037	3.168	5.572	11.544	5.213	2.115
NM_008788	Pcolce	-2.121	34.808	1.554	2.377	-1.227	6.474	0.966	4.248	9.973	41.049	46.913	19.12	6.03
NM_018865	Wisp1	-2.551	53.311	-1.166	3.281	-1.505	6.438	0.187	0.191	1.634	8.99	5.467	1.82	3.841
NM_001146268	Pdgfrb	-2.855	53.354	0.066	0.024	-1.245	6.424	-0.396	0.668	9.134	62.286	16.955	6.819	6.137
NM_001347362	Aig1	0.016	0.019	0.247	0.231	-1.006	6.387	0.011	0.012	5.742	5.316	11.956	5.662	4.487
NM_027521	Arhgap45	-1.775	32.131	1.179	1.37	-1.028	6.331	0.149	0.223	2.575	8.299	6.019	2.794	1.145
NM_029761	Dok5	-2.827	3.751	1.421	2.211	-1.129	6.246	6.443	44.894	0.075	0.528	15.45	6.753	2.38
NM_001168346	Nfatc4	-0.846	12.816	0.389	0.431	-1.074	6.167	-1.272	10.335	7.579	12.831	6.815	3.07	2.201
NM_178929	Kazald1	3.784	33.566	3.699	38.949	-1.233	6.148	1.027	4.423	7.877	0.533	38.765	15.769	1.128
NM_029870	Crebrf	0.514	1.483	1.278	5.298	-1.111	6.073	-0.713	2.428	4.204	2.75	5.755	2.512	0.973
NM_007592	Car8	-0.151	0.088	2.877	15.275	-1.012	5.991	5.119	125.902	0.225	0.236	16.53	7.765	0.981
NM_008923	Prkar1b	-0.619	3.065	0.02	0.009	-1.084	5.937	0.802	2.994	3.694	5.326	14.058	6.306	5.803
NM_029436	Klhl24	0.529	3.423	-0.064	0.03	-1.219	5.937	-1.402	13.214	20.627	13.378	18.922	7.632	7.509
NM_008668	Nab2	-0.88	10.557	0.553	1.557	-1.045	5.935	0.697	3.071	17.846	30.981	61.608	28.401	18.166
NM_008481	Lama2	-2.413	60.192	2.476	7.482	-1.681	5.927	0.141	0.151	1.496	7.523	5.552	1.616	0.27
NM_173371	H6pd	-1.44	35.201	0.09	0.054	-1.013	5.863	0.173	0.337	4.816	12.292	11.298	5.323	4.671
NM_008751	Nxph1	1.142	0.411	7.052	44.728	-1.196	5.839	5.819	61.725	0.151	0.064	20.431	8.421	0.056
NM_028231	Kcnmb2	2.773	12.68	3.29	28.226	-1.261	5.742	0.716	2.241	1.958	0.265	7.986	3.153	0.304
NM_015731	Atp9a	-1.36	6.994	1.059	1.315	-1.499	5.672	0.356	0.442	2.766	6.729	10.283	3.485	1.556
NM_001145920	Runx2	-2.369	18.777	0.321	0.175	-1.295	5.572	1.326	3.683	0.887	4.32	5.698	2.189	1.629
NM_010729	Loxl1	-2.395	46.524	-0.252	0.142	-1.105	5.572	-0.311	0.621	9.405	46.386	16.83	7.438	8.252
NM_010189	Fcgrt	-0.894	12.605	1.225	3.779	-1.23	5.476	-0.833	4.153	17.442	30.363	23.577	9.579	3.835
NM_013560	Hspb1	-1.908	22.61	0.359	0.131	-1.47	5.376	-0.495	0.995	9.304	32.734	18.701	6.48	4.667
NM_001359530	Mcam	0.098	0.072	2	3.756	-1.208	5.294	0.71	1.753	2.09	1.86	8.09	3.361	0.794
NM_001098636	Pwwp2b	-0.546	0.306	0.695	0.615	-1.542	5.115	2.278	4.765	0.355	0.497	5.196	1.701	0.981
NM_001085385	1600014C10Rik	3.126	47.492	1.867	2.915	-2.554	5.052	-2.782	27.497	6.322	0.682	5.464	0.897	0.232
NM_008416	Junb	-0.412	1.799	-0.894	2.993	-1.209	4.891	-3.207	45.365	92.625	115.808	23.862	9.825	17.138
NM_145503	Lzts2	-0.793	9.283	0.605	0.973	-1.155	4.89	0.358	1.023	3.784	6.163	11.067	4.753	2.909
NM_010755	Maff	-0.463	2.407	-0.984	4.701	-1.067	4.75	-0.422	1.112	6.843	8.888	11.006	5.004	9.294
NM_010284	Ghr	-0.8	12.577	2.006	9.491	-1.031	4.733	-0.749	2.923	6.5	10.659	8.162	3.783	0.879
NM_007709	Cited1	3.763	19.379	4.397	36.826	-1.152	4.661	0.394	0.852	9.306	0.631	27.888	11.968	0.529
NM_028166	1600014C10Rik	1.222	20.422	1.599	13.94	-1.215	4.552	-0.688	4.423	10.868	4.358	16.099	6.634	2.044
NM_001362945	Gsn	-1.23	12.958	1.11	1.47	-1.553	4.517	0.352	0.412	3.473	7.647	13.465	4.328	1.875
NM_144538	Rab3il1	-0.806	4.175	1.401	1.562	-1.451	4.39	-0.667	1.1	3.096	5.091	5.503	1.913	0.672
NM_001205044	Jarid2	0.003	0.003	-1.267	1.767	-1.431	4.292	-1.579	6.443	6.084	5.724	5.648	1.993	4.493
NM_011214	Ptpru	-1.162	18.821	2.268	8.89	-1.441	4.292	-0.254	0.411	4.679	9.833	10.907	3.854	0.742
NM_130887	Papln	1.392	3.547	-0.397	0.062	-1.207	4.234	1.63	6.528	0.951	0.343	6.986	2.874	3.595
NR_036582	Cbarp	0.532	2.544	-0.043	0.019	-1.115	4.225	0.418	0.798	5.614	3.655	16.747	7.344	7.12
NM_148927	Plekha4	-1.211	8.322	1.06	3.339	-1.012	4.195	0.507	1.384	1.807	3.916	5.309	2.522	1.134
NM_198168	Ppp2r5b	-0.066	0.105	-0.009	0.005	-1.016	4.161	0.748	2.721	6.055	5.985	21.182	9.96	9.418
NM_172145	Eva1b	-1.962	46.054	0.364	0.309	-1.241	4.151	-0.306	0.46	14.784	54.192	29.03	11.712	8.516
NM_172570	Trim47	-1.635	3.79	-0.369	0.172	-1.735	4.145	1.499	2.207	0.688	2.026	6.68	1.891	2.307
NM_007483	Rhob	-0.892	28.769	-1.831	3.404	-1.105	4.108	-1.848	17.358	55.162	96.524	33.927	15	49.636
NM_138313	Bmf	2.516	41.024	-1.815	2.16	-1.261	4.09	-2.718	30.239	13.483	2.201	5.056	2.002	6.538
NM_001190974	Axl	-1.768	44.871	0.731	1.592	-1.004	3.998	0.362	0.716	5.709	18.215	15.161	7.164	4.051
NM_007871	Dnm2	-0.991	9.993	0.051	0.017	-1.364	3.916	-0.02	0.014	3.846	7.194	10.022	3.702	3.343
NM_029658	Rflnb	0.225	1.532	-0.285	0.126	-1.145	3.912	0.275	0.79	11.717	9.431	32.617	13.935	15.71
NM_013464	Ahr	-0.944	6.791	1.185	1.201	-1.107	3.771	2.401	21.618	1.648	2.986	19.18	8.551	3.467
NM_011769	Zim1	-1.272	25.665	2.878	12.456	-1.102	3.66	-1.319	10.573	11.055	25.076	9.898	4.355	0.546
NM_001267717	Nrep	-1.604	31.267	-0.144	0.066	-1.625	3.624	-1.588	6.558	7.073	20.164	7.567	2.297	2.389
NM_019521	Gas6	-1.765	13.157	0.3	0.105	-1.1	3.619	-0.402	0.508	3.028	9.756	5.097	2.244	1.692
NM_001347100	Cald1	-2.79	88.178	1.385	1.52	-1.301	3.613	-0.018	0.012	11.274	73.561	28.572	11.007	3.87
NM_030251	Abtb1	0.489	1.349	-0.017	0.007	-1.039	3.613	-0.918	2.988	5.949	3.974	6.672	3.081	2.92
NM_019811	Acss2	0.046	0.061	0.219	0.28	-1.014	3.46	2.432	35.252	3.66	3.322	41.432	19.35	15.57
NM_029091	Klc4	0.908	6.827	0.755	0.88	-1.118	3.385	-0.995	3.944	11.285	5.646	12.641	5.537	3.095
NM_001164420	Pqlc1	-1.588	4.666	0.652	0.45	-1.408	3.264	1.561	2.513	0.737	2.092	5.955	2.125	1.266
NM_008508	Lor	0.509	0.492	0.542	0.171	-1.154	3.229	2.201	9.191	1.013	0.669	10.593	4.579	2.879
NM_001206367	Gsn	-1.192	16.413	0.544	0.451	-1.364	3.145	-1.367	6.242	12.602	26.961	12.841	4.777	3.066
NM_013749	Tnfrsf12a	1.703	13.247	-1.433	6.306	-1.14	3.073	-0.073	0.068	11.106	3.182	23.862	10.318	26.168
NM_026597	Inka1	-2.274	12.266	0.95	0.938	-1.2	2.954	0.469	0.436	3.43	15.767	11.244	4.648	2.243
NM_026376	Plxnd1	-2.283	71.124	0.887	2.205	-1.129	2.943	0.403	0.733	12.734	58.397	38.018	16.555	8.389
NM_001356264	Cnppd1	-0.01	0.01	0.434	0.202	-1.185	2.933	-0.153	0.14	3.985	3.793	8.374	3.503	2.411
NM_145439	Tmc6	0.336	1.585	0.874	1.191	-1.137	2.908	-0.082	0.071	7.26	5.407	15.544	6.709	3.44
NM_145450	Clba1	0.796	3.083	0.153	0.072	-1.117	2.899	0.388	0.561	3.149	1.708	9.18	4.029	3.402
NM_134117	Pkdcc	-0.708	15.058	-0.792	0.641	-1.022	2.812	-2.62	31.295	78.677	120.942	26.721	12.531	20.536
NM_007599	Capg	-1.513	10.105	-0.096	0.039	-1.142	2.76	1.992	7.748	3.189	8.534	28.816	12.421	12.466
NM_133902	Sdsl	1.786	10.047	0.358	0.189	-1.254	2.686	-0.997	2.425	4.43	1.202	5.437	2.166	1.584
NM_001163721	Smim1	0.316	0.795	1.243	2.357	-1.219	2.644	0.252	0.257	2.192	1.651	6.246	2.563	1.01
NM_007584	Ddr1	2.248	19.645	-0.032	0.01	-1.246	2.606	-1.463	4.29	6.858	1.356	6.093	2.43	2.349
NM_001290467	Hs6st2	0.102	0.244	0.057	0.02	-1.084	2.586	-0.826	2.054	9.88	8.686	12.189	5.443	4.934
NM_021467	Tnni1	3.042	13.673	-1.054	2.426	-1.203	2.551	0.686	1.186	3.493	0.396	13.223	5.485	10.731
NM_023055	Slc9a3r2	-1.229	9.637	-0.182	0.104	-1.015	2.527	-0.458	0.739	7.163	15.921	10.867	5.105	5.455
NM_027147	Enho	1.254	8.453	0.254	0.151	-1.142	2.477	-0.108	0.091	9.166	3.62	19.289	8.321	6.57
NM_001024702	C1ql4	2.981	5.709	2.999	1.683	-1.105	2.471	0.744	1.134	1.969	0.233	7.241	3.227	0.364
NM_001130153	Arhgef1	-0.578	5.942	0.155	0.09	-1.007	2.45	-0.14	0.161	10.641	14.943	19.926	9.457	7.962
NM_028179	2200002D01Rik	0.188	0.044	0.048	0.012	-1.276	2.441	3.06	7.626	0.483	0.398	9.931	3.946	3.524
NM_001024512	Fam149b	0.187	0.537	-0.125	0.036	-1.014	2.436	-1.382	6.203	6.403	5.295	5.165	2.404	2.442
NM_011896	Spry1	-0.03	0.037	1.232	1.557	-1.185	2.435	1.125	3.121	17.399	16.823	88.508	37.208	14.785
NM_026790	Ifi27	-0.093	0.078	1.581	1.075	-1.42	2.422	-0.665	0.745	4.407	4.405	7.601	2.711	0.846
NM_001357965	Wscd1	1.054	5.149	3.281	8.766	-1.351	2.418	0.98	1.43	3.374	1.519	17.539	6.516	0.632
NM_178577	Tmem205	0.375	0.728	-0.393	0.176	-1.454	2.393	-1.126	2.041	7.33	5.294	9.384	3.261	4.02
NM_001081178	Adgrf5	-3.031	66.157	5.248	26.163	-1.348	2.369	2.628	9.783	0.587	4.546	9.417	3.577	0.087
NM_001359263	Ivns1abp	1.13	11.84	0.05	0.016	-1.026	2.339	-1.667	7.556	20.063	8.642	13.319	6.172	5.595
NM_001168492	Pdcd4	0.086	0.023	-0.163	0.043	-1.51	2.29	-2.412	3.799	9.801	8.791	5.396	1.824	1.901
NM_175145	Tmem127	-0.456	4.788	-0.118	0.046	-1.045	2.249	-0.647	1.236	10.386	13.387	14.097	6.477	6.589
NM_001113331	Shc1	-0.967	14.199	0.494	0.319	-1.17	2.213	0.72	1.148	20.054	36.773	76.668	32.182	21.599
NM_001113515	Col2a1	3.839	29.095	1.804	5.309	-1.003	2.174	2.179	16.627	4.179	0.273	39.011	18.671	4.955
NM_080469	Eri3	-0.092	0.332	0.016	0.005	-1.024	2.11	-1.508	6.367	32.735	32.793	24.099	11.247	10.427
NM_144560	Gas2l1	-0.203	0.562	-0.222	0.087	-1.189	2.084	-0.187	0.15	6.423	6.929	13.23	5.512	6.062
NM_207220	Gpr137	-0.623	3.062	0.05	0.016	-1.014	2.063	0.329	0.337	3.662	5.313	9.635	4.492	4.07
NM_019488	Slc2a8	0.139	0.306	0.851	0.91	-1.02	2.03	-0.524	0.755	5.696	4.849	8.285	3.865	2.012
NM_009499	Vasp	-1.147	39.665	-0.151	0.069	-1.014	1.988	0.785	1.697	24.734	51.54	88.561	41.646	43.497
NM_001164352	Efemp2	-0.744	1.835	0.483	0.278	-1.08	1.978	-0.256	0.203	6.012	9.448	11.001	4.918	3.306
NM_010174	Fabp3	-0.953	1.007	1.519	2.19	-1.087	1.965	1.315	1.828	1.154	2.084	6.22	2.799	0.907
NM_001198791	Ak1	1.957	31.339	0.668	0.326	-1.296	1.938	-1.824	4.701	9.652	2.322	6.935	2.649	1.575
NM_001037957	Dyrk1b	0.613	4.466	-0.63	0.336	-1.397	1.908	-1.894	4.256	11.895	7.282	8.736	3.111	4.548
NM_001177362	Gpr137	-0.169	0.23	0.008	0.002	-1.178	1.905	-0.531	0.684	3.688	3.904	5.905	2.494	2.323
NM_026942	Stoml1	-0.431	0.774	-0.002	0.001	-1.099	1.856	-0.356	0.33	2.946	3.721	5.065	2.255	2.114
NM_026063	Uqcc2	-0.989	8.98	0.459	0.295	-1.04	1.828	0.035	0.028	31.586	58.852	67.999	31.697	21.521
NM_001080754	Ambra1	0.159	0.336	-0.756	0.467	-1.225	1.799	-1.156	1.971	6.385	5.368	6.928	2.795	4.45
NM_001177369	Nfkb2	0.546	0.762	-0.234	0.075	-1.247	1.792	0.09	0.044	2.361	1.533	6.186	2.454	2.73
NM_133913	Chpf2	-0.733	2.573	-0.239	0.106	-1.05	1.778	1.361	2.873	3.686	5.771	20.257	9.256	10.332
NM_033475	Rab34	-0.279	1.218	-0.634	0.272	-1.427	1.718	-1.608	2.744	13.386	15.245	12.161	4.274	6.258
NM_001317217	Myl6	-0.56	0.822	0.342	0.099	-1.143	1.617	-0.173	0.111	3.231	4.492	6.462	2.798	2.045
NM_181066	Brat1	0.339	0.957	-0.14	0.044	-1.103	1.614	-0.531	0.554	5.307	3.969	8.171	3.586	3.732
NM_001085371	Speg	0.025	0.032	-0.077	0.025	-1.008	1.494	0.12	0.085	4.509	4.194	10.14	4.783	4.759
NM_001130408	Arf1	-0.293	0.731	-0.575	0.265	-1.287	1.453	-1.091	1.313	4.691	5.394	5.542	2.139	3.015
NM_001271963	Eya2	1.413	22.801	0.495	0.189	-1.082	1.403	-1.264	2.306	9.749	3.447	8.897	3.963	2.675
NM_013539	Spsb2	-0.521	0.566	0.928	0.527	-1.232	1.393	0.808	0.615	1.581	2.138	6.684	2.687	1.329
NR_073438	Crebzf	0.446	0.714	-0.967	0.766	-1.047	1.363	-0.781	1.217	5.484	3.834	6.74	3.128	5.705
NM_001160235	Fam168b	0.093	0.274	-0.029	0.007	-1.201	1.348	-1.635	3.014	8.855	7.79	6.774	2.769	2.673

## Sheet: 4-1 1.25-NPC up
TranscriptID	GeneSymbol	log2Fc.1	nlog10P.1	log2Fc.2	nlog10P.2	log2Fc.3	nlog10P.3	log2Fc.4	nlog10P.4	meanTPM.NPC	meanTPM.NFC	meanTPM.NPC_0uM	meanTPM.NPC_1.25uM	meanTPM.NPC_5uM
NM_008615	Me1	-0.371	1.222	-0.369	2.141	0.066	0.137	4.758	Inf	2.054	2.503	55.003	54.588	65.855
NM_010043	Des	1.259	20.52	2.024	26.366	-0.399	1.766	2.844	245.362	22.756	8.989	221.523	160.39	36.881
NM_009128	Scd2	-0.179	2.684	-0.167	0.225	-0.127	0.355	2.376	232.413	186.161	198.133	1094.39	948.912	998.539
NM_009127	Scd1	-1.627	28.82	-0.127	0.104	0.103	0.185	5.489	226.19	4.111	11.941	178.175	181.639	185.494
NM_008706	Nqo1	-0.961	3.72	0.551	0.643	0.037	0.036	5.864	213.758	1.995	3.675	117.103	114.158	73.442
NM_029770	Unc5b	-0.741	4.354	0.019	0.019	-0.201	0.62	3.502	207.936	3.292	5.207	44.186	36.584	33.749
NM_010358	Gstm1	0.108	0.29	0.724	6.457	-0.019	0.027	3.493	182.388	21.496	18.701	252.828	237.572	134.342
NM_013518	Fgf9	1.791	17.614	0.277	0.159	0.784	6.539	3.476	151.301	2.442	0.662	16.371	26.7	20.725
NM_030143	Ddit4l	0.089	0.051	0.198	0.093	0.291	1.327	3.885	147.241	1.149	1.028	14.31	16.618	13.624
NM_133186	Steap3	-1.867	10.368	3.46	63.704	-1.457	20.512	4.805	140.609	0.518	1.773	41.187	14.283	1.215
NM_001039151	Cd44	-0.216	0.428	0.835	2.809	-0.002	0.002	4.261	129.046	3.699	4.027	73.644	69.636	36.484
NM_011701	Vim	-1.714	84.851	0.426	0.582	0.138	0.39	2.709	127.768	95.181	294.584	584.003	611.502	423.518
NM_007592	Car8	-0.151	0.088	2.877	15.275	-1.012	5.991	5.119	125.902	0.225	0.236	16.53	7.765	0.981
NM_009242	Sparc	-0.067	0.275	1.078	6.611	-0.436	2.073	2.029	118.416	175.847	173.815	999.54	705.122	311.23
NM_145942	Hmgcs1	-0.722	1.784	-0.09	0.065	0.384	0.383	5.241	115.249	1.04	1.621	31.682	38.802	38.416
NM_010195	Lgr5	-1.013	5.017	1.631	2.666	-1.234	10.966	3.899	114.179	0.83	1.572	30.346	12.218	3.71
NM_172950	Lpin1	-0.834	4.829	-0.062	0.029	-0.579	5.789	3.262	110.016	1.071	1.796	15.847	10.072	9.877
NM_007669	Cdkn1a	0.509	1.557	-1.938	9.051	0.004	0.003	3.658	109.937	3.328	2.196	43.19	41.243	148.13
NM_001199296	Acly	0.276	1.78	0.001	0.001	-0.507	3.326	2.189	107.594	24.898	19.279	166.856	111.461	104.27
NM_008338	Ifngr2	-0.389	3.802	0.899	8.175	-0.558	4.63	2.037	104.685	14.296	17.562	89.232	57.596	28.817
NM_011313	S100a6	-2.427	25.606	0.581	0.581	-0.9	4.651	4.407	104.441	4.217	21.347	170.95	87.641	54.375
NM_146094	Fads1	-0.175	1.588	0.084	0.172	-0.115	0.423	1.783	102.739	42.166	44.789	162.392	142.568	125.786
NM_007621	Cbr2	1.82	0.802	3.254	20.788	-1.42	12.739	6.228	101.159	0.356	0.094	74.699	26.707	2.636
NM_001110315	Kif1a	1.305	1.797	-0.444	0.447	-0.714	4.407	3.291	98.992	0.652	0.25	10.826	6.261	7.995
NM_027468	Cpm	0.386	2.055	0.435	0.176	0.271	0.823	2.557	98.184	8.204	5.919	41.5	47.355	32.344
NM_010941	Nsdhl	0.037	0.058	-0.096	0.133	-0.149	0.459	2.991	97.769	11.431	10.498	104.158	89.385	89.25
NM_009673	Anxa5	-1.652	105.886	0.215	0.448	-0.585	5.627	2.009	97.604	29.297	86.489	182.515	115.788	93.319
NM_010176	Fah	-0.66	1.022	0.498	0.448	-0.191	0.344	4.111	96.097	1.037	1.551	21.055	17.602	11.552
NM_009831	Ccng1	-0.401	2.935	-0.001	0	0.044	0.037	3.168	94.649	10.956	13.591	99.197	96.675	90.794
NM_178679	Zfp365	1.015	2.52	-0.223	0.18	-0.24	0.558	3.156	94.538	0.865	0.399	9.42	7.566	8.297
NM_009263	Spp1	-1.053	0.628	2.478	10.088	-2.81	24.989	7.795	93.727	0.24	0.475	376.144	51.315	8.653
NM_001040611	Peg10	-2.534	80.357	1.07	3.238	0.1	0.074	4.852	93.654	2.882	15.692	80.413	82.038	36.472
NM_130877	Peg10	-2.534	80.357	1.07	3.238	0.1	0.074	4.852	93.654	2.882	15.692	80.413	82.038	36.472
NM_146006	Lss	0.287	1.025	-0.256	0.58	-0.264	1.158	2.674	87.567	5.173	4.007	41.084	32.413	36.279
NM_001159683	Zfp217	0.109	0.283	0.244	0.186	0.099	0.136	2.284	87.564	3.146	2.75	14.891	15.064	11.936
NM_177282	Mical2	0.744	7.72	0.775	0.682	0.069	0.175	2.235	87.175	6.343	3.573	29.375	29.311	16.127
NM_001195130	Phc2	-0.797	4.156	0.295	0.77	0.05	0.074	3.241	87.063	2.14	3.516	20.173	19.889	15.115
NM_133167	Parvb	-0.013	0.011	0.164	0.091	-0.358	1.481	2.608	86.78	2.282	2.175	18.385	13.671	11.325
NM_011653	Tuba1a	-0.36	3.237	-0.198	0.226	0.167	0.354	2.203	86.384	194.739	235.852	822.509	881.951	942.349
NM_022018	Fam129a	-0.603	1.167	0.841	2.511	-1.554	26.49	3.617	84.596	0.757	1.089	28.331	9.166	4.789
NM_001039347	Kcnd3	-1.676	7.54	0.42	0.184	0.451	1.331	3.17	77.552	0.717	2.184	4.875	6.349	4.468
NM_198860	Lrrc75b	0.411	0.536	1.929	4.638	-0.573	2.323	3.732	77.547	0.644	0.453	13.133	8.413	2.074
NM_010295	Gclc	0.327	2.397	0.335	0.278	0.265	0.739	2.553	76.037	11.258	8.455	56.879	64.912	48.243
NM_001080926	Lrp8	2.427	51.372	0.122	0.087	0.358	0.898	2.933	74.666	4.084	0.71	25.226	30.64	26.329
NM_007765	Crmp1	-2.013	4.239	-1.297	12.038	-0.861	6.142	4.988	73.644	0.261	1.005	15.508	8.083	18.6
NM_012037	Vat1	-1.167	28.454	-0.062	0.034	-0.587	2.606	2.499	72.788	7.957	16.803	69.5	44.085	43.276
NM_009636	Aebp1	-1.567	49.242	-0.094	0.062	-0.518	3.816	2.157	72.701	8.703	24.262	57.286	38.143	37.891
NM_008791	Pcp4	2.34	16.631	3.302	2.163	0.626	1.266	4.174	71.334	17.798	3.304	214.061	316.696	30.223
NM_010730	Anxa1	-1.948	10.02	1.25	1.332	-2.164	15.629	4.12	71.075	1.053	3.857	84.683	18.123	7.045
NM_008129	Gclm	-0.533	3.893	-0.36	0.496	0.396	2.062	2.143	70.829	6.6	8.973	22.952	28.591	34.428
NM_001290817	Sparc	-0.14	0.501	1.013	7.507	-0.416	2.904	2.08	70.625	41.754	43.352	243.234	173.519	80.144
NM_001173506	Map1a	-2.462	66.541	1.062	7.688	-0.579	4.348	2.851	68.31	1.167	6.063	12.98	8.278	3.691
NM_010213	Fhl3	-1.315	28.025	0.272	0.357	-0.225	0.448	2.887	67.859	6.297	14.758	56.115	45.788	35.288
NM_028261	Tmem173	-1.191	16.303	0.484	0.933	-0.177	0.315	2.49	66.344	3.684	7.907	24.051	20.349	13.637
NM_019444	Ramp2	0.698	9.022	1.067	14.775	0.19	0.456	1.782	65.957	46.598	26.999	144.528	157.408	70.265
NM_008495	Lgals1	-1.774	44.791	0.43	0.319	-0.407	0.722	2.652	65.666	68.744	221.534	586.778	425.056	292.691
NM_001081185	Flnc	-2.265	188.956	0.306	0.748	-0.603	3.843	2.192	65.548	2.941	13.299	21.06	13.177	9.976
NM_001081162	Slc4a11	1.268	2.565	0.111	0.06	0.478	0.793	3.501	65.434	0.812	0.314	6.769	9.06	7.857
NM_176933	Dusp4	1.303	22.81	-0.113	0.06	-0.057	0.078	2.179	65.339	22.138	8.4	107.529	98.361	99.883
NM_001252659	Ldlr	-0.284	0.395	-0.345	1.311	-0.224	0.501	3.163	65.336	1.034	1.19	11.177	9.061	10.767
NM_009112	S100a10	-1.961	61.004	0.362	0.589	-0.289	0.818	2.449	65.336	28.534	104.66	195.847	153.196	110.956
NM_013470	Anxa3	-0.568	1.661	2.187	3.826	-1.279	12.035	2.433	64.644	4.577	6.411	61.853	24.237	4.911
NM_001033189	C77080	0.452	0.539	0.341	0.865	-0.523	2.056	3.084	64.481	1.023	0.697	12.815	8.512	6.296
NM_172710	Sel1l3	2.545	87.127	0.109	0.101	1.271	8.519	1.887	64.088	26.212	4.199	41.853	95.063	82.699
NM_026677	Rab13	0.093	0.214	1.82	35.016	-0.458	2.167	1.971	64.025	14.444	12.766	80.035	55.595	14.709
NM_020332	Ank	-0.041	0.089	1.179	2.019	-1.703	17.567	1.615	63.738	12.939	12.492	132.958	38.87	16.171
NM_001360165	Hmgcr	-0.285	0.278	0.075	0.089	-0.69	3.861	3.022	63.476	0.779	0.902	10.512	6.206	5.509
NM_178111	Trp53inp2	0.108	0.229	-0.093	0.15	-0.537	3.761	1.78	62.723	6.36	5.573	32.82	21.439	21.349
NM_011908	Ubl3	0.1	0.299	1.921	25.03	-0.348	2.177	1.926	62.618	14.349	12.567	71.79	53.528	13.245
NM_009517	Zmat3	0.122	0.474	-0.475	0.395	-0.031	0.03	1.915	62.425	4.826	4.175	19.299	17.889	23.351
NM_172769	Sc5d	0.195	0.538	-0.324	0.632	-0.041	0.063	2.199	61.987	8.956	7.382	43.863	40.38	47.351
NM_032398	Plvap	-4.161	43.555	5.673	53.35	-2.111	14.478	4.418	61.936	0.735	12.48	69.247	15.384	0.285
NM_008751	Nxph1	1.142	0.411	7.052	44.728	-1.196	5.839	5.819	61.725	0.151	0.064	20.431	8.421	0.056
NM_008449	Kif5c	1.792	32.857	-1.645	46.18	1.31	13.98	1.649	61.579	4.991	1.346	6.569	15.365	44.9
NM_030018	Tmem50b	-0.291	1.52	0.669	2.953	-0.385	2.303	1.872	61.285	7.036	8.096	34.793	25.281	14.807
NM_145360	Idi1	0.445	2.058	-0.037	0.025	-0.155	0.198	2.413	60.996	22.377	15.505	138.196	116.736	112.43
NM_172813	Enox1	1.114	11.589	1.146	5.635	0.348	1.137	1.892	60.734	3.811	1.656	11.492	13.87	5.881
NM_008062	G6pdx	-0.39	3.15	-0.288	0.452	0.377	1.737	2.073	59.762	13.938	17.139	46.564	57.642	65.846
NM_001362677	Prkar1a	-1.353	8.817	0.396	0.443	0.335	0.337	2.719	59.222	3.524	8.433	19.28	22.82	16.253
NM_007600	Capn1	0.489	1.574	0.721	3.019	-0.276	0.787	1.948	59.177	3.741	2.519	17.957	14.156	7.999
NM_011577	Tgfb1	-2.643	37.531	0.124	0.118	-1.359	10.134	3.501	58.448	2.044	12.018	60.852	22.73	19.453
NM_009504	Vdr	1.442	7.184	1.808	2.35	0.612	0.997	2.668	57.543	1.811	0.621	7.76	11.295	3.047
NM_011898	Spry4	-1.405	40.607	0.955	14.038	-0.486	4.817	1.928	56.873	8.991	22.388	49.584	33.591	16.204
NM_011990	Slc7a11	-0.499	0.356	-1.135	7.007	0.762	1.991	4.315	56.166	0.266	0.347	3.239	5.166	10.646
NM_207237	Man1c1	-0.37	1.732	-0.38	0.326	-0.582	2.057	2.955	56.046	3.058	3.72	36.721	23.226	28.219
NM_207625	Acsl4	0.462	1.364	0.176	0.114	0.352	0.64	2.678	55.929	3.294	2.25	17.206	20.659	17.181
NM_001039723	Tmem120b	0.5	1.422	0.714	1.428	0.049	0.068	2.247	53.825	3.653	2.426	17.222	16.983	9.712
NM_001256431	Agap3	-0.441	0.815	-0.321	0.737	-0.087	0.147	2.672	52.145	1.802	2.315	12.569	11.227	13.147
NM_019737	B4galt6	-0.568	7.803	0.005	0.002	0.69	2.57	1.944	51.728	6.102	8.505	15.13	23.023	21.578
NM_023141	Tor3a	-0.127	0.177	1.542	2.208	0.179	0.372	2.409	51.241	2.606	2.662	12.665	13.575	4.401
NM_029688	Srxn1	-1.395	8.204	-0.595	0.935	-0.108	0.124	3.536	51.237	1.303	3.231	16.793	14.798	21.044
NM_015762	Txnrd1	-0.124	0.22	-0.291	0.15	0.945	2.874	3.375	51.099	3.883	3.986	21.703	39.702	45.466
NM_008985	Ptprn	-0.232	NA	-0.793	4.766	-0.787	3.213	8.904	50.713	0.018	0.02	15.545	8.612	13.936
NM_001040426	Thsd4	1.441	37.192	0.333	0.274	0.072	0.123	1.9	50.366	16.153	5.584	59.241	59.107	44.13
NM_153526	Insig1	-0.12	0.193	-0.061	0.066	-0.365	1.654	2.276	50.289	23.254	23.911	150.194	110.453	107.982
NM_007670	Cdkn2b	-2.376	1.531	0.646	1.233	-1.918	15.662	7.638	50.205	0.071	0.342	52.013	13.192	7.841
NM_001313974	Prkar1a	-1.362	6.905	0.494	0.599	0.244	0.225	2.852	50.124	1.404	3.38	8.962	9.977	6.637
NM_001039472	Kif21b	-0.979	11.925	-1.355	34.172	-0.293	1.45	1.672	49.592	2.382	4.398	9.599	7.452	17.806
NM_019477	Acsl4	0.7	2.945	0.26	0.625	-0.382	1.102	2.441	49.333	2.724	1.571	20.016	14.513	11.347
NM_010497	Idh1	-0.128	0.496	0.068	0.056	-0.125	0.227	2.118	49.24	25.602	26.346	125.804	109.018	97.603
NM_009565	Zbtb7b	-0.665	2.529	-0.555	0.651	-0.281	0.808	2.503	47.904	1.2	1.781	8.532	6.674	9.219
NM_001291439	Hmgcs1	-0.196	0.598	-0.276	0.359	-0.417	1.19	2.311	47.899	36.438	39.409	251.106	177.313	200.547
NM_020010	Cyp51	-0.223	0.462	-0.221	0.467	-0.084	0.182	2.424	47.346	13.401	14.795	79.163	70.682	77.116
NM_008976	Ptpn14	0.564	7.868	-0.458	0.915	0.511	4.438	1.602	47.195	16.786	10.636	36.977	50.058	64.398
NM_001173477	Speg	1.066	3.849	0.966	6.209	-0.415	1.452	2.071	47.139	6.57	2.943	37.878	27.088	12.929
NM_011607	Tnc	0.358	3.15	1.073	1.249	-0.571	6.013	1.815	47.113	32.098	23.586	173.008	110.858	49.553
NM_010833	Msn	-0.979	42.955	0.061	0.052	0.117	0.214	2.004	46.878	21.108	39.168	80.644	83.277	74.517
NM_016866	Stk39	-0.644	13.738	0.819	5.281	0.193	0.713	1.617	46.418	10.897	16.021	30.237	32.858	17.414
NM_145148	Frmd4b	-0.207	0.127	1.027	5.684	-0.31	0.7	3.851	46.034	0.769	0.845	14.197	10.942	5.003
NM_001357257	Igdcc3	-0.737	1.005	0.867	2.392	0.441	0.968	4.001	45.572	0.33	0.519	4.055	5.221	2.669
NM_010593	Jup	-0.636	8.154	-0.093	0.148	-0.636	3.931	1.603	45.137	9.099	13.335	44.201	27.151	27.088
NM_001159510	Pacsin2	-1.724	3.029	1.312	2.502	1.076	1.85	5.497	45.118	0.153	0.472	3.431	6.819	2.56
NM_029761	Dok5	-2.827	3.751	1.421	2.211	-1.129	6.246	6.443	44.894	0.075	0.528	15.45	6.753	2.38
NM_001330687	Gdf15	-1.027	0.622	-1.462	0.52	-0.523	0.684	5.219	43.571	0.345	0.666	19.183	12.676	33.18
NM_001042513	Txnrd1	-0.632	10.9	-0.364	0.544	0.06	0.08	2.068	43.455	23.447	34.154	97.668	96.397	116.598
NM_007856	Dhcr7	0.038	0.096	-0.028	0.015	-0.432	1.309	2.263	43.292	10.694	9.774	71.76	50.27	48.196
NM_009320	Slc6a6	-0.065	0.219	-0.199	0.331	0.164	0.484	1.599	43.169	22.11	21.736	61.773	65.768	70.357
NM_183188	Rbfox1	3.048	29.199	1.076	3.94	0.05	0.041	2.92	42.952	2.835	0.317	21.527	21.128	9.348
NM_010720	Lipg	1.676	9.92	-0.966	5.953	-0.147	0.384	2.154	42.869	2.965	0.864	15.083	12.959	23.607
NM_008634	Map1b	0.643	12.482	0.174	0.104	0.189	0.21	2.821	41.957	8.019	4.83	51.404	55.745	45.783
NM_001363230	Sp6	3.137	1.883	-1.474	0.376	-1.813	16.963	3.899	41.938	0.342	0.038	18.507	5.006	12.764
NM_001146124	Psap	-1.627	12.161	0.787	1.319	0.126	0.114	3.367	41.618	3.082	8.867	30.192	31.348	16.918
NM_080638	Mvp	0.144	0.251	0.634	3.555	-0.858	6.751	1.922	41.48	2.707	2.303	19.138	10.064	6.062
NM_008255	Hmgcr	0.178	0.649	-0.116	0.098	-0.457	1.658	2.174	40.612	24.839	20.696	159.587	109.868	111.801
NM_028454	Tm7sf2	0.941	6.11	-0.066	0.041	-0.824	2.873	2.84	39.97	7.046	3.447	92.119	49.422	48.54
NM_001360010	Dnm1l	0.005	0.003	-0.303	0.899	0.217	0.59	2.332	39.239	1.858	1.738	8.323	9.161	10.585
NM_026470	Spata6	-0.375	2.236	1.322	16.039	-0.051	0.088	1.641	39.061	8.261	10.109	27.586	25.339	9.471
NM_007830	Dbi	-0.183	0.663	0.152	0.259	0.008	0.009	1.862	38.914	65.792	70.183	245.64	235.319	197.585
NM_009061	Rgs2	-1	9.134	3.766	40.424	-1.485	8.544	2.554	38.842	5.291	9.902	89.731	30.597	2.084
NM_134469	Fdps	0.198	0.462	-0.274	0.562	-0.572	1.941	2.458	38.827	39.198	32.226	329.605	211.356	239.374
NM_001111049	Cd151	0.083	0.169	-0.116	0.158	-0.284	0.732	1.859	38.769	12.451	11.017	56.679	44.26	44.904
NM_008981	Ptprg	-0.013	0.02	0.244	0.665	0.302	1.125	1.882	38.239	16.919	15.978	52.382	61.103	48.184
NM_001168333	Tinagl1	-2.3	7.811	1.707	1.717	-1.422	13.33	3.642	37.809	0.772	3.618	26.44	9.41	2.651
NM_145130	Lpcat3	0.211	0.966	0.088	0.083	0.014	0.019	1.76	37.61	12.6	10.22	43.584	41.93	36.831
NM_019699	Fads2	0.016	0.03	0.015	0.008	0.387	0.936	2.475	37.463	35.37	32.958	155.158	193.795	178.783
NM_009295	Stxbp1	-1.53	31.087	1.142	3.702	-0.582	2.56	2.298	36.526	2.408	6.535	18.287	11.642	4.895
NM_001309528	Sgsm1	2.296	11.401	-0.037	0.014	-0.465	1.791	2.293	36.498	1.167	0.226	8.166	5.61	5.424
NM_028943	Sgms2	2.171	50.263	-0.507	0.079	1.865	10.71	2.046	36.037	7.371	1.532	8.683	29.811	40.125
NM_019963	Stat2	-0.225	0.788	0.194	0.224	-0.288	0.886	1.602	35.665	3.75	4.13	14.437	11.172	9.129
NM_019811	Acss2	0.046	0.061	0.219	0.28	-1.014	3.46	2.432	35.252	3.66	3.322	41.432	19.35	15.57
NM_001361904	Ogdh	-0.817	2.515	0.157	0.082	1.116	3.44	3.368	35.006	0.498	0.822	2.448	5.043	4.209
NM_008183	Gstm2	-0.978	13.714	0.851	2.017	-0.099	0.156	2.083	34.999	19.72	36.517	92.368	82.213	42.328
NM_144923	Blvrb	-1.044	10.765	0.864	4.814	-0.184	0.207	1.912	34.568	12.115	23.416	52.987	44.696	23.015
NM_025436	Msmo1	0.07	0.062	0.019	0.013	-0.378	1.204	3	34.303	14.88	13.42	160.606	116.814	108.164
NM_019422	Elovl1	-0.832	8.341	0.061	0.06	-0.112	0.201	1.731	34.203	8.713	14.626	32.185	28.401	25.398
NM_020275	Tnfrsf10b	0.129	0.306	-0.399	0.509	0.051	0.067	1.909	34.04	4.637	3.99	17.343	17.115	21.121
NM_001077529	Nme2	-0.513	2.023	0.206	0.255	0.182	0.173	2.33	33.949	19.184	25.679	86.75	94.854	76.57
NM_013867	Bcar3	2.23	31.423	0.584	0.479	-0.353	1.19	1.765	33.15	6.582	1.323	29.409	21.971	13.798
NM_001199556	AW551984	-0.732	8.14	4.305	51.23	-1.166	15.131	1.688	32.649	6.85	10.728	51.21	21.649	1.018
NM_013495	Cpt1a	0.715	4.879	1.506	4.366	-0.274	1.72	1.886	32.527	14.284	8.156	65.936	51.812	17.156
NM_025451	Camk2n1	-1.749	30.468	1.014	1.619	-0.324	0.768	1.934	31.713	8.003	25.23	39.78	30.085	13.991
NM_001303423	Aldoc	2.263	3.105	1.271	4.537	-1.342	12.144	2.985	31.694	1.144	0.22	23.58	8.889	3.454
NM_009116	Prrx2	-0.469	0.935	-0.116	0.013	-0.532	1.333	2.4	31.508	3.606	4.719	28.23	18.642	18.554
NM_011328	Sct	0.06	0.024	-1.756	3.146	-0.088	0.06	3.793	31.397	1.467	1.313	22.092	19.869	62.377
NM_010700	Ldlr	-0.27	0.387	-0.216	0.44	-0.403	1.923	2.724	31.29	8.329	9.536	75.305	54.091	58.837
NM_001317355	Pld3	-1.283	1.324	0.628	0.564	-0.195	0.203	4.237	31.065	0.358	0.816	7.919	6.602	3.997
NM_001302386	Clcn4	-0.731	3.918	0.712	2.737	-0.188	0.417	1.669	30.832	4.499	6.992	16.907	14.021	8.035
NM_009398	Tnfaip6	1.278	4.214	-0.222	0.106	1.168	4.244	2.707	30.553	4.531	1.733	13.686	28.935	31.882
NM_198411	Inf2	-1.134	22.189	-0.011	0.008	-0.381	1.133	1.827	30.441	4.551	9.396	21.694	15.871	14.965
NM_178598	Tagln2	-2.442	65.732	-0.373	1.342	-0.119	0.199	2.01	29.773	16.171	82.874	72.873	64.049	77.44
NM_009270	Sqle	0.018	0.024	-0.098	0.099	-0.31	0.95	2.067	29.742	21.064	19.643	113.454	86.625	86.989
NM_001111099	Cdkn1a	-1.559	0.127	-1.218	0.871	0.035	0.017	8.674	29.74	0.019	0.056	9.652	9.437	20.605
NM_001360648	Tbcb	-1.889	5.207	0.313	0.168	0.443	0.641	3.661	29.56	1.52	5.358	14.674	19.017	14.17
NM_053272	Dhcr24	0.207	0.66	-0.075	0.097	-0.361	2.229	1.613	29.533	22.149	18.086	89.908	66.544	65.496
NM_015763	Lpin1	-0.173	0.229	0.461	1.199	-1.042	6.765	2.295	29.413	1.21	1.283	12.589	5.84	3.959
NM_001347422	Peli3	2.042	7.399	0.103	0.041	0.341	0.499	2.914	29.315	0.797	0.183	4.92	5.889	5.083
NM_001111102	Lmna	-1.029	17.183	0.024	0.01	-0.807	3.262	1.943	29.257	7.416	14.201	51.271	27.946	25.611
NM_001164724	Il33	-0.492	0.198	4.134	18.874	0.578	0.779	4.687	29.073	0.421	0.568	7.557	10.689	0.568
NM_024406	Fabp4	-8.622	79.289	4.109	14.371	-0.12	0.089	5.945	29.037	0.177	66.586	12.241	10.815	0.566
NM_007929	Emp2	0.02	0.032	0.811	7.142	-1.053	13.595	1.634	28.849	4.84	4.484	32.098	14.721	7.846
NM_010197	Fgf1	3.225	60.136	6.944	52.93	-0.558	1.593	2.334	28.648	12.549	1.249	96.146	62.211	0.473
NM_011498	Bhlhe40	-1.567	16.938	-0.465	0.928	-0.048	0.066	1.749	28.603	4.378	12.146	15.647	14.446	18.679
NM_001033206	Pwwp2b	-1.178	1.372	1.416	4.247	-0.711	1.704	4.096	28.565	0.512	1.089	14.487	8.512	2.951
NM_010902	Nfe2l2	-0.954	33.479	0.21	0.242	0.117	0.191	1.679	28.565	15.394	28.071	46.972	48.5	39.16
NM_026784	Pmvk	0.305	1.328	-0.261	0.341	-0.323	1.181	1.625	28.29	16.223	12.376	64.726	49.077	55.23
NM_133774	Stard4	-0.525	3.683	0.129	0.105	-0.19	0.276	1.787	28.219	7.48	10.164	30.612	25.28	21.718
NM_001357458	Cxxc5	-0.171	0.107	0.408	0.216	0.91	1.194	4.427	28.077	1.402	1.461	16.653	29.68	20.755
NM_172416	Ostm1	0.207	0.452	0.32	0.574	-0.511	2.147	1.74	27.834	3.071	2.495	15.162	10.054	7.56
NM_213659	Stat3	-0.716	4.954	0.508	2.155	-0.536	5.535	1.719	27.822	4.704	7.235	23.173	15.188	9.963
NM_011101	Prkca	-0.951	18.837	1.539	9.041	-0.464	1.971	1.768	27.613	2.929	5.328	14.218	9.817	3.16
NM_009101	Rras	-1.462	9.166	0.633	1.603	-0.764	3.043	2.361	27.569	3.757	9.755	33.559	18.915	11.35
NM_183408	Pde4a	-1.17	2.305	0.057	0.046	-0.231	0.45	3.569	27.436	0.587	1.236	8.407	6.846	6.13
NM_001357459	Cxxc5	-0.177	0.105	0.408	0.213	0.911	1.176	4.43	27.129	1.117	1.164	13.262	23.656	16.539
NM_009890	Ch25h	-0.663	1.918	4.56	44.979	-2.153	16.274	2.61	26.913	2.339	3.476	65.449	14.05	0.553
NM_026582	Wls	-1.29	9.871	0.165	0.287	0.371	0.502	2.296	26.703	2.738	6.287	10.855	13.165	10.97
NM_023598	Arid5b	-0.051	0.148	0.7	1.548	0.267	0.508	1.876	26.618	12.613	12.284	39.857	45.514	26.017
NM_001360211	Fdft1	0.077	0.097	-0.163	0.34	-0.259	1.66	2.125	26.476	12.176	10.906	65.735	52.22	54.696
NR_138462	Itga8	1.176	11.739	1.224	1.011	0.627	1.708	2.297	26.448	9.425	3.907	31.064	45.415	18.278
NM_175171	Mast4	0.401	3.157	0.141	0.064	0.141	0.262	1.706	26.146	4.575	3.259	13.982	14.671	12.479
NM_026823	Arl8a	-0.093	0.283	0.228	0.211	0.152	0.206	1.982	25.935	16.383	16.443	60.069	63.688	50.68
NM_178405	Atp1a2	0.884	4.282	3.388	9.109	1.008	2.642	2.493	25.858	1.915	0.974	5.532	10.555	0.955
NM_146126	Sord	0.045	0.081	1.2	5.336	0.234	0.605	1.59	25.358	6.896	6.272	18.28	20.351	8.318
NM_029639	Plet1	0.033	0.021	-1.663	1.66	2.021	15.09	2.476	25.059	1.679	1.525	2.366	9.187	27.371
NM_001193309	Morc4	-0.358	1.072	0.801	0.952	0.563	2.109	2.163	24.954	2.989	3.598	9.363	13.155	7.081
NM_021050	Cftr	3.456	49.811	3.36	22.528	-0.818	5.371	1.765	24.934	8.077	0.683	50.094	26.933	2.46
NM_027418	Mapk6	-0.805	0.974	-0.615	0.479	1.272	2.5	4.214	24.633	0.582	0.969	4.697	10.708	15.287
NM_011920	Abcg2	-0.456	3.611	2.926	30.928	-1.018	6.531	1.618	24.496	9.592	12.367	61.854	28.854	3.534
NM_009396	Tnfaip2	0.909	11.111	-0.113	0.05	-0.174	0.115	2.615	24.479	5.785	2.901	41.112	34.715	35.355
NM_181409	Mtmr11	-0.365	2.003	0.343	0.521	-0.634	2.591	1.817	24.455	4.69	5.683	26.442	16.181	11.936
NM_007657	Cd9	0.193	0.488	0.344	0.37	0.042	0.043	1.896	24.388	20.333	16.681	75.927	74.082	54.923
NM_001306071	Itga3	-1.287	1.19	-0.502	0.199	2.002	5.014	4.33	24.299	0.254	0.569	1.33	5.047	6.677
NM_013743	Pdk4	0.991	2.45	2.363	6.027	-0.756	3.928	2.471	23.794	1.828	0.87	17.699	9.937	1.819
NM_001347169	Nrd1	-0.398	1.37	0.27	0.32	-0.172	0.229	1.799	23.53	3.122	3.88	12.721	10.682	8.294
NM_138656	Mvd	0.489	2.569	-0.256	0.378	-0.649	2.264	1.894	23.079	11.116	7.462	66.741	40.487	45.36
NM_001356487	Optn	-1.264	6.662	-0.451	0.645	-0.121	0.179	2.362	22.886	1.278	2.895	7.369	6.46	8.199
NM_172119	Dio3	0.596	0.318	0.023	0.004	0.964	0.951	4.391	22.884	0.328	0.205	3.671	6.76	6.33
NM_010442	Hmox1	-1.006	6.326	-0.258	0.411	-0.114	0.213	1.947	22.704	6.304	11.911	27.135	23.881	26.769
NM_010052	Dlk1	-2.459	44.42	-0.335	0.267	-0.157	0.227	2.345	22.603	9.482	49.247	55.648	47.415	55.696
NM_001311074	Flnc	-1.655	28.187	0.166	0.174	-0.4	1.726	1.739	22.599	1.868	5.531	8.501	6.136	5.115
NM_177092	Msrb3	-0.905	11.167	2.179	5.739	-0.464	1.747	1.66	22.416	4.871	8.608	21.97	15.134	3.084
NM_173047	Cbr3	-0.663	0.377	-0.52	0.388	0.646	0.667	4.447	22.376	0.45	0.663	6.349	9.435	12.795
NM_021447	Trim54	1.609	NA	1.02	0.841	-1.264	7.861	8.856	22.239	0.02	0.006	20.972	8.361	3.886
NM_001145959	Ndrg2	2.107	24.887	1.181	7.7	0.042	0.046	1.837	22.086	12.557	2.737	44.793	44.013	18.193
NM_175242	Ppp1r18	-0.588	3.159	0.278	0.201	0.483	0.892	2.405	21.894	3.057	4.336	11.962	15.936	12.217
NM_013464	Ahr	-0.944	6.791	1.185	1.201	-1.107	3.771	2.401	21.618	1.648	2.986	19.18	8.551	3.467
NM_011161	Mapk11	0.006	0.007	0.335	0.168	-0.699	3.301	1.786	21.608	4.421	4.138	25.556	14.946	11.185
NM_001282044	Schip1	0.727	3.28	0.168	0.161	-0.322	0.711	1.892	21.606	4.263	2.415	20.4	15.486	12.926
NM_001253806	Ywhaz	-0.885	3.85	0.358	0.492	0.507	0.453	2.382	21.247	7.227	12.429	27.772	36.871	26.864
NR_075078	Pitpnm1	0.057	0.066	-0.444	1.101	-0.509	1.745	1.789	21.146	2.251	2.021	11.41	7.619	9.718
NM_001166409	Rbm3	-0.203	0.57	0.053	0.032	0.83	4.056	1.626	20.836	25.022	26.921	45.014	75.879	68.29
NM_001130450	Nfe2l1	-0.053	0.083	0.505	3.901	-0.664	8.425	1.619	20.823	8.053	7.847	40.401	24.231	15.968
NM_001305441	Spry1	-2.115	3.726	1.722	20.334	0.109	0.074	3.629	20.788	5.079	20.771	61.219	61.916	17.522
NM_001355187	Mtfr1l	-0.411	0.29	0.392	0.507	0.311	0.244	2.434	20.701	1.278	1.621	5.876	6.805	4.855
NM_008691	Nefm	0.937	4.479	-1.24	9.569	0.969	5.525	1.79	20.688	2.685	1.324	4.919	9.107	20.134
NM_172924	Peak1	-1.886	103.615	0.717	1.458	-0.034	0.033	1.721	20.386	3.462	12.037	12.105	11.232	6.386
NM_001358314	Srebf1	0.212	0.443	0.443	0.598	-0.805	2.098	2.135	20.33	4.955	4.056	39.151	21.302	14.719
NM_024201	Ccdc127	-0.321	0.263	0.36	0.206	1.161	2.166	3.439	20.093	0.477	0.561	2.414	5.11	3.698
NM_015819	Hs6st2	-0.137	0.158	0.97	1.95	0.16	0.126	1.945	19.99	4.379	4.476	15.775	16.514	7.917
NM_178869	Ttll1	0.255	0.568	0.266	0.423	-0.131	0.212	1.676	19.87	4.375	3.445	15.802	13.756	10.697
NM_001270646	Prob1	1.473	16.957	1.259	4.318	0.119	0.123	1.925	19.759	2.525	0.856	9.069	9.435	3.682
NM_001305442	Spry1	-2.498	4.853	1.748	29.124	-0.097	0.027	3.61	19.742	3.508	18.389	47.913	41.633	11.57
NM_026738	Card19	-0.532	1.384	0.199	0.147	0.092	0.086	2.098	19.705	4.121	5.608	17.006	17.374	14.108
NM_016741	Scarb1	-0.64	5.245	0.149	0.139	-0.787	3.973	1.625	19.685	6.022	8.851	33.043	18.191	15.361
NM_009318	Tapbp	-0.43	1.32	0.963	2.034	-0.632	1.856	1.743	19.522	2.279	2.896	12.168	7.465	3.593
NM_001168228	Morf4l2	-0.305	0.164	0.452	0.227	1.355	1.85	4.185	19.518	0.973	1.118	7.275	17.575	11.924
NM_001079909	Fgfr1	0.108	0.136	2.211	3.744	0.257	0.195	3.214	19.515	1.671	1.455	13.356	15.314	3.088
NM_001356417	Slc39a10	-0.988	1.82	0.423	0.375	0.747	1.084	3.221	19.339	0.613	1.133	3.558	5.619	3.909
NM_001038708	Cdc42se1	-1.593	2.495	0.555	0.964	0.607	0.771	3.407	19.088	0.762	2.175	5.609	7.989	5.095
NM_001136059	Cyp1a1	0.014	NA	1.162	1.366	0.868	1.841	11.322	18.753	0.004	0.003	5.608	9.814	4.134
NM_001356332	Pgd	0.362	0.28	0.536	0.437	0.679	1.137	3.339	18.642	2.884	2.092	18.989	28.872	18.569
NM_008349	Il10rb	-0.816	4.302	1.007	3.481	-0.708	5.268	1.649	18.534	3.412	5.628	17.993	10.492	4.894
NM_144794	Tmem63a	-1.351	14.347	0.682	2.501	-0.439	1.941	1.617	18.494	1.697	4.073	7.264	5.103	2.961
NR_103491	Gm38426	0.357	0.285	-1.172	4.265	0.613	1.855	2.497	18.492	1.311	0.97	5.059	7.338	15.501
NM_001111050	Cd151	2.03	10.949	0.261	0.173	0.429	0.504	2.28	18.408	7.388	1.677	27.281	35.388	27.485
NM_174989	Ticam1	-0.072	0.104	0.206	0.147	0.069	0.076	1.781	18.247	3.288	3.254	11.102	11.125	9.023
NM_001252520	Picalm	-1.688	6.408	0.475	0.586	-0.14	0.158	2.91	17.888	0.862	2.625	7.401	6.368	4.284
NM_153507	Cpne2	-0.748	3.3	0.699	1.935	-0.046	0.042	2.056	17.739	2.429	3.842	10.755	9.947	5.707
NM_021278	Tmsb4x	-1.888	34.058	-0.521	0.584	-0.773	2.433	1.964	17.647	150.02	524.53	1030.9	574.404	769.482
NM_001164677	Pdcd6ip	-0.031	0.035	0.131	0.087	0.356	0.811	1.703	17.64	2.777	2.649	7.324	8.907	7.598
NM_146095	Rorb	3.6	63.444	-0.562	0.412	1.171	2.253	2.903	17.582	7.925	0.607	27.336	58.246	79.7
NM_001309439	Sct	-0.252	0.063	-1.987	3.756	-0.121	0.093	3.93	17.575	0.739	0.839	12.479	10.955	40.251
NM_001289921	Rorb	3.603	59.159	-0.564	0.412	1.17	2.239	2.903	17.417	5.862	0.449	20.229	43.066	58.997
NM_001166429	Hnrnpf	-1.454	2.644	0.761	0.342	2.004	1.288	4.587	17.311	0.578	1.473	3.657	13.792	7.539
NM_001205082	Scarb1	0.592	1.746	-0.358	0.484	0.027	0.029	1.595	17.298	6.039	3.761	18.503	17.881	21.551
NM_001347178	Elavl4	3.683	2.908	2.975	1.263	0.778	0.983	3.277	17.056	0.576	0.043	3.403	5.528	0.661
NM_001302539	Zbed3	-1.103	5.432	0.315	0.273	1.205	3.895	2.147	17.049	3.475	6.969	6.906	15.127	11.344
NM_001362526	Hnrnph1	-1.549	7.412	0.516	0.304	1.57	3.153	3.509	16.987	4.046	11.037	16.086	45.321	29.396
NM_001362525	Hnrnph1	-1.549	7.168	0.517	0.304	1.57	3.125	3.51	16.8	3.449	9.415	13.721	38.661	25.069
NM_001285892	Sae1	-0.698	1.115	0.045	0.016	1.028	2.549	2.452	16.701	1.231	1.874	3.377	6.617	5.957
NM_001355165	Rpn2	-1.297	11.18	0.44	0.403	0.751	1.348	2.522	16.701	5.514	12.755	19.591	31.26	21.462
NM_181058	Zbtb20	2.021	10.427	0.224	0.172	0.343	0.604	1.808	16.678	2.234	0.51	6.386	7.687	6.141
NM_001113515	Col2a1	3.839	29.095	1.804	5.309	-1.003	2.174	2.179	16.627	4.179	0.273	39.011	18.671	4.955
NM_001199105	Trp53inp1	0.4	0.777	-0.217	0.103	-0.144	0.091	1.883	16.351	2.355	1.67	10.053	8.512	9.312
NM_001146287	Cables1	-0.095	0.082	0.719	2.065	0.24	0.351	2.081	16.316	1.882	1.91	7.011	7.814	4.444
NM_019401	Nmi	-0.89	1.194	1.21	2.599	0.196	0.217	2.55	16.127	1.006	1.734	5.238	5.725	2.336
NM_001110500	Canx	-1.343	8.751	0.115	0.063	0.58	0.604	2.231	16.102	2.893	6.869	9.517	13.34	11.495
NM_011150	Lgals3bp	-1.84	14.064	0.685	0.598	-0.318	0.657	1.741	16.081	3.193	10.663	13.699	10.494	6.129
NM_001105197	Tfe3	-1.206	5.734	-0.112	0.075	-0.388	0.578	2.231	15.964	1.516	3.288	9.55	6.976	7.055
NM_175259	Shisa4	-0.587	1.521	0.231	0.298	-0.519	2.348	1.928	15.932	5.092	7.215	28.632	19.073	15.129
NM_008181	Gsta1	-1.82	NA	0.698	0.959	0.412	0.421	10.627	15.582	0	0.026	7.469	9.455	5.465
NM_001130149	Drosha	-0.933	5.039	-0.421	0.478	1.045	3.096	2.359	15.206	1.298	2.338	3.352	6.573	8.175
NM_001359152	Rbpj	0.456	1.934	0.088	0.035	1.28	2.59	1.692	15.067	2.121	1.453	2.96	6.738	5.939
NM_021515	Ak1	3.282	3.227	0.087	0.036	-0.381	0.551	3.158	14.948	1.656	0.165	19.776	14.442	12.766
NM_001253892	Slc4a2	-1.253	4.987	0.829	2.902	-0.172	0.225	2.267	14.927	1.182	2.658	6.61	5.611	2.946
NM_001360932	Ufc1	-1.733	3.536	0.435	0.274	-0.109	0.077	2.962	14.882	0.98	3.033	8.578	7.476	5.139
NM_001198839	Bcar1	-0.412	0.499	0.089	0.029	0.136	0.112	2.828	14.85	1.882	2.349	12.636	13.184	11.456
NM_001290805	Kif3a	-0.677	3.883	0.84	2.843	0.022	0.015	1.768	14.832	1.504	2.259	5.265	5.046	2.626
NM_013863	Bag3	-1.057	10.01	-0.151	0.132	0.113	0.161	1.672	14.81	7.498	14.716	22.788	23.532	24.313
NM_007585	Anxa2	-2.571	57.093	0.178	0.144	-0.771	4.387	1.646	14.708	51.053	285.886	280.768	157.04	129.296
NM_001285901	Eri3	-0.992	1.347	0.002	0.001	0.709	1.044	2.693	14.689	1.053	1.941	4.307	6.686	6.245
NM_011448	Sox9	-0.761	2.367	2.518	13.063	-0.587	2.637	2.18	14.573	4.302	6.828	30.244	19.151	3.134
NM_013864	Ndrg2	1.161	1.003	1.068	1.725	0.246	0.177	3.178	14.503	0.708	0.291	5.505	6.24	2.804
NM_145402	Tmem51	0.165	0.235	1.353	4.852	-0.142	0.143	1.617	14.497	3.093	2.599	10.74	9.299	3.423
NM_001177629	Grb10	-0.458	1.499	1.103	1.345	1.122	1.527	2.695	14.114	2.959	3.832	9.2	18.854	8.175
NM_030210	Aacs	-0.132	0.451	-0.312	0.343	-0.672	2.021	1.644	14.031	9.395	9.698	48.311	28.732	33.505
NM_026306	Trmt112	-1.912	19.165	0.808	2.417	-0.201	0.287	1.966	14.025	3.582	12.672	16.577	13.789	7.337
NM_001081241	Ripor1	-0.606	9.752	0.806	1.798	0.219	0.28	1.731	14.016	9.754	13.969	28.71	31.932	16.998
NM_001362617	Ewsr1	1.926	NA	2.649	0.384	7.505	4.1	9.752	13.923	0.021	0.009	0.096	15.74	2.332
NM_001363023	Tshz2	-0.444	1.658	0.95	1.193	0.661	0.773	2.4	13.872	2.227	2.836	7.59	11.607	5.587
NM_001355757	Irgm1	0.731	0.703	0.529	0.516	-0.848	6.506	2.263	13.864	1.905	1.058	16.929	8.954	5.834
NM_001159718	2021-09-02	-0.626	2.231	0.194	0.111	0.464	0.457	1.979	13.854	1.782	2.583	5.33	6.901	5.635
NM_001017959	Lamp2	-0.035	0.039	0.37	0.341	0.605	1.075	1.929	13.804	7.864	7.551	20.19	29.549	21.297
NM_001166428	Hnrnpf	-1.447	1.658	0.76	0.318	2.005	2.218	4.575	13.746	0.238	0.608	1.507	5.685	3.107
NM_010240	Ftl1	-0.322	2.768	0.052	0.026	-0.489	0.845	1.764	13.692	645.754	758.446	3176.17	2148.42	1945.41
NM_001145952	Lpp	-1.096	4.085	0.863	1.161	0.283	0.272	2.618	13.659	1.039	2.074	5.424	6.245	3.208
NM_001360021	Bmp1	-1.833	9.745	0.551	0.386	1.051	1.53	3.001	13.375	1.01	3.372	4.069	8.002	5.075
NM_001331109	Akt2	-0.661	0.875	0.321	0.233	0.711	1.028	2.447	13.286	1.071	1.581	3.712	5.753	4.283
NM_001364993	Tshz1	-1.206	11.342	0.877	1.181	0.864	2.223	1.866	13.248	2.272	4.921	4.729	8.137	4.136
NM_001141931	Rbms1	-0.7	0.975	0.466	0.312	1.139	2.13	3.229	13.216	1.561	2.371	6.888	14.463	9.729
NM_176848	Fbxo2	1.176	0.402	1.35	1.096	-0.801	0.582	4.709	13.209	0.206	0.084	9.692	5.244	1.946
NM_001253751	Fdps	-0.021	0.012	-0.299	0.172	-0.771	1.355	2.746	13.042	2.075	1.991	24.495	13.602	15.67
NM_001253390	Mtfr1	-0.147	0.104	-0.191	0.118	0.629	1.382	2.648	12.976	1.463	1.512	6.121	9.009	9.609
NM_001358627	Tor1aip2	-0.289	0.415	0.284	0.425	0.162	0.275	1.782	12.914	1.617	1.861	5.115	5.451	4.194
NM_001252082	Zswim8	-0.817	4.333	0.043	0.017	0.183	0.155	2.092	12.828	1.607	2.657	6.223	6.747	6.08
NM_028029	Dnmbp	-0.645	3.338	1.003	2.922	0.015	0.013	1.689	12.796	1.764	2.593	5.811	5.605	2.607
NM_001146057	Acot7	-2.157	29.865	0.704	0.993	-0.804	2.954	1.827	12.695	3.585	15.135	22.888	12.476	7.135
NM_028263	Fgfbp3	0.647	1.298	-0.864	1.225	-0.826	2.45	1.727	12.695	1.941	1.167	11.853	6.312	10.818
NM_198671	Gse1	-0.678	4.391	0.313	0.302	0.01	0.007	1.79	12.592	2.661	4.018	9.417	9.058	6.793
NM_178701	Lrrc8d	0.138	0.149	0.942	0.531	0.839	1.078	2.518	12.57	1.269	1.091	4.223	7.163	3.485
NM_001363484	Clint1	0.27	0.223	0.227	0.099	1.588	2.577	2.529	12.46	1.678	1.298	3.377	9.543	7.59
NM_001254762	Mospd3	-1.189	13.771	0.715	1.092	0.536	0.91	1.999	12.447	5.573	11.927	15.833	21.962	12.456
NM_001360135	Sema4b	-1.533	3.935	0.277	0.12	0.994	1.696	3.023	12.328	0.84	2.307	3.499	6.714	5.155
NM_001359827	Kansl2	-0.426	0.421	0.2	0.104	0.805	1.518	2.327	12.297	2.38	2.967	7.128	11.761	9.568
NM_007915	Ei24	-0.491	1.201	0.492	0.308	1.141	1.979	2.554	12.208	3.282	4.349	9.05	18.968	12.566
NM_001042523	Txnrd1	0.618	0.316	0.051	0.012	1.306	1.73	3.898	12.191	0.377	0.227	2.327	5.506	4.948
NM_001159410	Guk1	-0.772	0.373	-0.112	0.075	0.589	0.484	3.516	12.143	0.594	0.94	4.713	6.657	6.711
NM_030256	Bcl9l	-0.687	11.17	1.179	1.263	0.205	0.159	2.215	12.041	3.514	5.311	14.62	16.091	6.559
NM_001347170	Hmga2	1.173	8.243	0.576	0.583	0.921	1.369	1.98	11.857	2.811	1.175	6.126	10.919	6.809
NM_001364403	Zc3h14	-0.615	1.657	0.336	0.418	0.259	0.337	1.757	11.735	2.168	3.103	6.342	7.212	5.316
NM_013509	Eno2	-0.647	1.264	0.359	0.263	-0.997	4.209	2.135	11.728	1.77	2.591	16.052	7.602	5.592
NM_001313984	Ubb	-2.098	3.091	-0.652	0.371	-0.948	0.382	3.233	11.578	1.459	5.671	26.317	13.362	19.464
NM_001111063	Comt	4.276	34.14	-0.299	0.122	1.276	2.335	2.526	11.305	791.432	37.798	1952.81	4479.52	5126.2
NM_080559	Sh3bgrl3	-1.054	12.185	0.562	0.847	0.111	0.11	1.63	11.279	24.928	48.724	73.655	76.129	47.883
NM_001163488	Pfkm	-0.424	0.547	0.551	0.516	0.603	0.841	2.26	11.274	1.198	1.494	3.899	5.652	3.603
NM_015817	Plpp2	-0.13	0.13	-0.321	0.204	-0.186	0.177	2.126	11.221	3.174	3.259	16.284	13.564	16.001
NM_001346665	Ampd2	-1.36	17.3	0.721	0.783	0.162	0.153	1.706	11.182	3.475	8.417	10.507	11.148	6.313
NM_013928	Schip1	0.758	1.129	0.907	0.42	0.501	0.696	2.12	11.148	2.912	1.63	9.352	12.489	6.277
NM_001164709	Syvn1	-1.834	10.81	-0.072	0.026	0.006	0.003	2.357	11.113	1.026	3.462	5.353	5.177	5.038
NM_008749	Nucb1	-0.603	1.818	0.671	0.472	1.071	1.513	2.805	11.085	2.298	3.278	7.91	15.844	9.236
NM_013750	Phlda3	-0.488	2.603	-1.111	4.327	-0.546	0.861	1.675	11.046	11.411	15.096	54.635	35.685	72.409
NM_001083912	Plekhg2	-1.171	7.939	0.141	0.129	-0.031	0.03	1.684	11.031	3.408	7.26	11.56	10.813	9.119
NM_009735	B2m	-1.076	18.807	0.531	0.512	0.318	0.403	1.782	10.956	22.628	44.713	64.492	76.755	49.285
NM_001313962	Rhoa	0.236	0.349	0.539	0.315	1.083	1.702	2.517	10.943	15.242	12.01	42.728	85.767	54.977
NM_001288586	Mdm2	0.514	0.92	0.417	0.251	0.428	0.575	2.061	10.92	2.949	1.948	9.464	12.083	8.467
NM_001163397	Elavl4	1.927	11.864	1.368	1.858	0.495	0.486	1.882	10.884	1.698	0.418	4.634	6.161	2.239
NM_001033293	Uap1l1	-0.248	0.577	1.029	1.83	-0.859	1.509	2.121	10.859	4.35	4.842	35.261	18.484	8.534
NM_001177867	Sgo2a	-0.493	1.385	0.393	0.567	1.674	4.354	1.701	10.832	3.146	4.183	3.365	10.064	7.137
NM_178900	Prkd2	-0.716	3.255	0.466	0.594	0.182	0.207	1.741	10.782	1.783	2.756	5.44	5.864	3.963
NM_001315488	Igf2	-1.312	30.205	0.171	0.09	0.735	1.16	1.973	10.764	20.281	47.265	49.554	78.29	64.642
NM_001190408	Gas2l1	-0.862	1.852	-0.13	0.056	-0.06	0.037	2.363	10.709	1.442	2.489	7.996	7.322	7.412
NM_031878	Smarcd2	0.279	0.865	0.584	0.469	1.435	3.109	1.985	10.705	5.972	4.623	9.142	23.304	14.453
NM_001293653	Rab7	-1.297	0.805	1.105	0.242	2.466	1.702	6.422	10.645	0.153	0.348	2.473	13.077	5.637
NM_001081337	Sipa1l2	0.808	1.764	0.726	0.804	0.226	0.239	2.062	10.63	2.083	1.134	7.704	8.584	4.843
NM_001253898	Ecsit	-0.095	0.029	-0.041	0.011	1.057	1.003	3.848	10.603	0.353	0.355	2.505	5.053	4.829
NM_183020	Atxn2l	-0.22	0.592	-0.046	0.016	1.004	2.384	2.046	10.44	10.691	11.768	22.749	43.672	41.995
NM_001042487	Dlgap4	-0.549	1.867	0.201	0.109	0.197	0.155	2.073	10.398	2.084	2.878	7.949	8.665	6.989
NM_029437	Ckap5	-0.374	1.109	0.385	0.242	1.35	3.596	1.979	10.359	1.936	2.342	3.117	7.526	5.375
NM_026520	Fam122a	-0.142	0.219	0.729	1.058	0.337	0.46	1.773	10.337	4.489	4.663	12.508	15.135	8.466
NM_001252648	4833439L19Rik	-0.601	0.784	-0.016	0.009	0.647	1.81	2.03	10.326	2.169	3.08	5.889	8.711	8.235
NM_001348349	Acd	-0.267	0.158	0.229	0.088	0.985	1.331	3.018	10.3	1.025	1.144	4.32	8.223	6.509
NM_001347216	Pcbp3	-0.044	0.032	-0.109	0.06	0.651	1.795	1.682	10.25	2.72	2.615	5.708	8.562	8.569
NM_001283029	Spin1	-1.147	6.194	0.729	1	0.517	0.621	1.973	10.185	1.657	3.454	4.731	6.4	3.593
NM_007622	Cbx1	0.163	0.134	-0.17	0.109	0.493	1.302	2.026	10.153	3.428	2.88	10.272	13.783	14.483
NM_001362704	Tmem127	-0.391	0.423	0.904	0.847	1.256	1.497	2.758	10.119	1.449	1.789	4.304	9.667	4.805
NM_001285776	Serpinh1	-0.771	2.776	0.225	0.103	0.833	0.901	2.416	10.08	2.596	4.18	8.119	13.682	10.863
NM_001290751	Tmx2	-0.264	0.18	0.233	0.15	0.63	1.525	2.118	9.932	2.683	3.041	7.834	11.412	9.134
NM_001362708	Sephs1	-0.76	3.798	0.912	1.22	1.019	1.007	2.249	9.842	1.325	2.11	3.273	6.217	3.069
NM_181821	Hcfc1r1	0.142	0.271	0.95	1.232	-0.01	0.006	1.727	9.816	10.591	8.984	36.383	34.553	16.539
NM_001284258	Ryk	0.717	0.785	0.969	0.996	1.198	2.435	2.998	9.784	1.511	0.858	5.405	11.868	5.631
NM_001165902	Ctnnb1	-0.705	1.021	0.489	1.607	0.164	0.149	1.672	9.754	28.086	42.476	82.986	87.455	58.122
NM_145381	Lactb2	0.309	0.263	0.485	0.374	0.069	0.065	1.781	9.709	1.99	1.523	6.76	6.739	4.514
NM_007744	Comt	1.527	38.715	-0.349	0.177	1.02	1.954	2.006	9.69	46.612	15.155	95.799	184.286	218.539
NM_001271405	Capzb	-1.764	0.823	1.774	0.512	1.898	0.718	7.026	9.641	0.101	0.308	3.637	12.789	3.467
NM_001357396	Impact	-1.001	3.797	0.648	2.438	-0.308	0.377	1.757	9.513	3.369	6.351	14.693	11.172	6.663
NM_001313919	Hif1a	-0.345	0.576	0.104	0.052	0.697	0.813	1.82	9.481	1.63	1.941	3.72	5.655	4.917
NM_007409	Adh1	-1.498	3.136	4.157	15.497	1.244	1.093	2.754	9.367	0.872	2.334	2.558	5.747	0.305
NM_027773	Fam57a	-0.646	1.643	-0.218	0.157	0.558	1.281	1.612	9.32	3.688	5.455	7.915	11.106	11.987
NM_001358257	1810055G02Rik	-0.58	0.101	0.915	0.147	3.456	2.241	7.829	9.303	0.05	0.064	1.008	10.531	5.172
NM_001359093	Rspry1	-0.635	0.518	0.749	0.422	0.695	0.453	3.377	9.301	0.686	1.01	4.609	7.021	3.887
NM_001164209	Tmem176b	-0.688	2.268	0.629	0.947	0.48	0.786	1.739	9.297	6.12	9.213	15.022	20.086	12.061
NM_001253807	Ywhaz	-0.854	1.07	0.357	0.678	0.334	0.238	1.743	9.27	21.664	36.245	60.134	70.577	51.682
NM_011415	Snai2	-2.256	45.376	2.083	4.189	0.165	0.164	1.701	9.222	9.973	45.053	29.887	31.981	6.952
NM_153164	Cnot1	0.089	0.126	0.234	0.123	1.075	3.091	1.845	9.217	3.739	3.289	6.593	13.228	10.479
NM_001290426	Zfp865	0.218	0.341	0.089	0.038	0.923	1.854	1.874	8.971	2.532	2.051	5.049	9.161	7.993
NM_001146346	Emp3	-1.525	6.569	0.989	1.907	-0.448	0.424	1.925	8.904	2.271	6.103	12.003	8.494	3.971
NM_001291191	Mef2a	-0.829	4.442	0.028	0.012	-0.125	0.101	1.624	8.83	2.919	4.864	10.209	8.847	8.1
NM_001347073	Ccdc136	-1.784	0.654	0.172	0.09	0.514	0.515	6.396	8.779	0.112	0.344	6.803	9.203	7.64
NR_037854	Atp6v0c-ps2	-2.317	5.412	-0.237	0.099	-0.044	0.019	3.494	8.768	1.039	4.788	12.225	11.452	12.53
NM_001252287	Ogdh	-0.837	1.63	0.13	0.057	0.622	0.929	2.331	8.757	1.01	1.688	3.415	5.019	4.253
NM_027153	Pir	-1.745	5.83	-0.448	0.377	0.388	0.598	2.327	8.715	1.403	4.452	5.572	6.92	8.897
NM_001284427	Smtn	-2.06	13.509	0.714	0.359	1.441	1.856	2.924	8.709	0.785	3.058	2.287	5.892	3.306
NM_001313936	Grb2	-0.989	4.276	0.293	0.146	0.571	0.196	2.251	8.709	3.326	6.156	11.205	15.604	11.843
NM_001252685	Smc5	-0.235	0.187	0.656	0.372	1.372	0.461	2.326	8.694	1.104	1.201	2.259	5.447	3.223
NR_002700	Gm7334	-1.225	2.087	-0.443	0.241	1.005	1.441	2.165	8.523	1.99	4.438	4.67	8.791	11.241
NM_029248	Taf1d	0.669	0.761	0.249	0.081	1.772	3.84	2.543	8.486	2.376	1.423	4.19	13.726	10.739
NM_001271705	Pgf	3.163	3.5	2.025	1.643	1.181	1.02	3.323	8.457	0.724	0.076	3.371	7.223	1.656
NM_001291192	Mef2a	-0.909	5.585	0.067	0.028	-0.279	0.22	1.616	8.402	1.88	3.322	7.289	5.658	5.055
NM_001162989	Phax	-0.179	0.094	0.489	0.135	1.682	1.67	3.72	8.375	0.653	0.686	2.733	8.495	5.607
NM_001025388.1	Eno1b	-3.149	NA	0.11	0.012	3.433	2.45	11.883	8.293	0.004	0.027	1.165	11.919	10.189
NM_001159646	Dut	-0.326	0.672	2.557	12.534	0.651	1.126	1.692	8.293	2.35	2.775	4.962	7.478	1.186
NM_207675	Cadm1	0.975	4.517	1.329	3.1	0.764	1.506	1.719	8.214	10.319	4.87	20.665	33.403	12.349
NM_001285425	Tcf24	2.026	16.399	2.4	3.626	-0.853	1.135	2.147	8.207	2.642	0.605	21.581	11.517	2.018
NM_178082	Insig2	-0.866	1.043	0.888	2.697	-0.074	0.058	2.391	8.039	1.419	2.397	8.144	7.269	3.69
NM_001109752	Dlg4	0.598	1.455	0.296	0.17	0.316	0.252	1.624	7.97	2.75	1.696	6.936	8.362	6.355
NM_001287180	Atf4	-1.245	4.715	-0.337	0.473	-0.015	0.013	1.778	7.963	11.921	26.559	42.798	40.156	47.591
NM_001357152	Crtc2	-1.236	2.275	0.665	0.285	1.901	3.284	2.939	7.921	0.662	1.49	1.415	5.027	2.922
NM_001159375	Eif4a1	-0.281	0.251	0.06	0.011	2.213	3.273	3.142	7.87	0.94	1.076	1.865	8.183	7.272
NM_001276410	Fn1	-2.015	29.897	0.356	0.192	-0.109	0.077	1.794	7.762	2.269	8.657	8.723	7.77	5.61
NM_007599	Capg	-1.513	10.105	-0.096	0.039	-1.142	2.76	1.992	7.748	3.189	8.534	28.816	12.421	12.466
NM_001113486	2021-09-09	-2.094	10.311	-0.19	0.253	0.265	0.4	2.021	7.713	1.357	5.425	4.754	5.412	5.77
NM_001356456	Thrap3	-0.136	0.221	0.171	0.095	0.832	1.959	1.633	7.692	9.956	10.244	18.003	30.374	25.073
NM_001326590	Tpst2	-0.818	0.322	1.155	0.491	2.176	2.483	4.107	7.657	0.402	0.651	1.565	6.745	2.815
NM_001363194	Msi2	1.134	3.621	0.637	0.492	1.206	1.916	2.023	7.579	4.038	1.708	7.411	16.076	9.652
NM_001357762	Mtch1	0.675	0.954	1.046	0.742	1.16	1.302	2.732	7.575	3.417	2.012	10.571	22.33	10.003
NM_001290537	Otud5	-0.944	3.02	0.124	0.047	0.617	1.018	1.908	7.514	1.781	3.218	4.497	6.591	5.595
NM_146024	Ankrd40	0.513	0.448	0.374	0.115	1.858	2.87	2.837	7.465	1.068	0.696	2.144	7.527	5.362
NM_001293559	Cox4i1	0.473	0.406	0.835	0.785	0.776	0.929	2.164	7.395	2.825	1.893	7.69	12.475	6.538
NM_012005	Med14	-0.013	0.011	0.155	0.069	0.416	0.432	1.909	7.327	2.509	2.399	7.268	9.329	7.791
NM_001358304	BC031181	-1.858	NA	1.164	0.223	2.448	0.696	10.067	7.291	0.005	0.038	2.386	12.153	5.017
NM_001081454	Furin	-1.737	7.293	-0.156	0.118	0.078	0.049	2.017	7.27	2.819	8.844	11.314	11.242	11.68
NM_001302481	Acy3	1.367	0.468	1.37	2.065	1.958	2.319	3.571	7.235	0.71	0.247	2.298	8.289	2.996
NM_001347071	Ccdc136	-0.083	0.07	-0.137	0.066	0.075	0.051	1.883	7.19	2.09	2.077	7.553	7.589	7.78
NM_001359199	Ubl3	-0.372	0.245	1.596	7.147	-0.215	0.358	2.433	7.094	1.255	1.526	8.142	6.677	2.068
NM_001353501	Asdurf	NA	NA	0.353	0.047	3.978	1.084	11.216	7.092	0	0	1.458	21.239	15.38
NR_045728	Gm16617	-0.032	0.012	0.67	0.585	0.062	0.038	2.054	6.987	1.294	1.232	5.334	5.303	3.119
NM_001168230	Morf4l2	-0.926	0.525	1.446	0.336	3.475	2.137	6.101	6.969	0.394	0.696	2.521	26.581	9.03
NM_001316748	Tspan14	-0.841	1.999	-0.137	0.054	0.497	0.441	2.147	6.893	2.099	3.506	6.837	9.163	9.322
NM_001276485	Dag1	-0.198	0.405	0.807	0.831	0.53	0.613	1.736	6.848	3.276	3.508	7.821	10.756	5.726
NR_157095	Hspb6	-0.384	0.135	0.899	0.485	2.019	3.02	3.6	6.848	0.746	0.899	2.311	8.974	4.463
NM_001302538	Zbed3	-3.471	6.378	0.691	0.32	1.832	2.703	5.504	6.844	0.287	2.998	3.883	13.064	7.512
NM_001199432	Dnmt1	-0.329	1.008	0.232	0.117	1.417	4.106	1.67	6.75	4.981	5.852	6.134	15.645	12.387
NM_001122830	Klhl26	-0.923	0.718	-0.365	0.353	0.14	0.106	2.795	6.51	0.757	1.353	4.936	5.139	6.196
NM_001252579	Sulf2	0.222	0.369	2.231	3.598	0.905	1.071	2.024	6.489	6.591	5.256	14.87	26.373	5.238
NM_001253700	Elp5	0.549	0.432	0.076	0.024	1.7	3.766	2.126	6.467	1.206	0.77	1.698	5.217	4.622
NM_001190975	Axl	-0.735	1.285	0.757	0.702	0.303	0.26	2.145	6.423	1.953	3.031	7.248	8.519	4.683
NM_028859	Ccdc182	1.321	1.739	-0.602	0.228	0.008	0.004	1.8	6.385	1.591	0.589	5.663	5.417	7.805
NM_001109684	Kazn	-0.923	0.563	-0.439	0.198	1.802	0.857	4.746	6.367	0.331	0.585	2.652	8.653	10.893
NM_001310591	Mtss1l	-0.918	6.863	-0.119	0.033	1.879	1.403	2.314	6.296	1.836	3.273	2.607	9.029	9.101
NR_001570	Xist	1.282	6.95	0.987	0.312	2.362	0.966	3.329	6.294	1.641	0.64	3.405	16.219	7.675
NM_016760	Clta	0.601	5.656	0.373	0.213	0.809	1.395	1.602	6.293	22.584	13.96	40.318	67.593	48.514
NM_001267591	Cant1	-0.142	0.097	0.411	0.527	0.199	0.29	1.617	6.286	1.806	1.869	5.005	5.447	3.823
NM_001252454	Epn1	-0.988	2.355	0.14	0.058	0.341	0.274	1.857	6.269	1.738	3.214	5.114	6.233	5.269
NM_001253862	Tcf12	-0.825	1.991	0.347	0.197	1.19	1.46	1.893	6.264	1.921	3.164	3.264	6.994	5.123
NM_001166627	Dynlt1f	0.992	1.873	1.376	1.093	1.602	3.28	1.987	6.254	4.659	2.207	6.301	18.217	6.537
NM_001164259	Fgfrl1	1.221	1.036	-0.416	0.18	1.971	3.709	2.644	6.245	1.221	0.495	1.992	7.51	9.306
NM_001324476	Smc6	0.094	0.161	0.955	1.198	1.129	2.474	1.669	6.163	2.203	1.937	3.299	6.916	3.319
NM_001048168	Nfyc	-1.736	1.091	1.447	0.386	2.507	1.419	6.041	6.14	0.13	0.415	1.561	8.567	2.906
NM_023456	Npy	1.905	5.197	-1.547	3.183	0.853	0.813	1.857	6.118	8.013	1.976	16.507	28.601	78.071
NM_001359262	Ivns1abp	1.446	8.673	0.799	0.719	0.823	1.055	1.879	6.048	4.199	1.442	9.002	15.299	8.156
NM_013634	Med1	0.13	0.14	0.19	0.105	0.841	1.22	1.642	5.89	2.857	2.445	5.183	8.737	7.139
NM_001271764	Tpm3	-0.03	0.028	0.119	0.049	0.691	0.63	1.646	5.879	2.277	2.177	4.506	7.038	6.007
NM_001163729	Klhdc3	0.251	0.225	-0.218	0.123	0.664	1.107	1.78	5.832	2.457	1.938	5.476	8.307	9.017
NM_001356401	Rnf20	-1.084	2.657	0.554	0.099	2.54	3.927	2.842	5.732	0.971	1.945	1.246	6.87	4.339
NM_001042623	Phc1	-0.321	1.076	0.612	0.461	1.669	4.33	1.775	5.712	4.605	5.395	5.101	15.554	9.421
NM_009373	Tgm2	-2.032	28.415	-0.665	0.137	0.64	0.224	1.864	5.665	4.459	17.192	10.726	15.955	23.974
NM_001080385	Clta	0.495	1.244	0.425	0.242	0.912	1.541	1.686	5.584	4.386	2.926	7.747	13.929	9.656
NM_199195	Bckdhb	0.009	0.003	0.135	0.045	1.104	1.216	2.407	5.492	1.192	1.109	3.014	6.274	5.296
NM_001363456	Fam192a	0.738	0.581	0.199	0.046	2.231	4.222	2.503	5.429	1.66	0.921	2.084	9.306	7.463
NM_001358491	Robo2	0.176	0.115	2.601	0.775	2.818	1.487	4.394	5.251	0.29	0.238	0.911	6.031	0.912
NM_001360979	Apc	0.154	0.271	0.724	0.613	0.955	1.506	1.642	5.203	2.19	1.844	3.652	6.724	3.775
NM_001359289	Gripap1	0.282	0.509	0.93	0.57	1.463	2.085	2.186	5.127	1.318	1.021	2.245	5.928	2.881
NR_151824	Nptn	-1.229	1.869	0.938	0.863	0.903	1.156	2.321	5.098	1.143	2.538	3.162	5.665	2.73
NM_001359560	Abracl	-1.246	3.214	0.24	0.1	0.133	0.084	1.741	5.077	1.706	3.76	5.376	5.594	4.398
NM_001360336	Ldb1	0.825	5.672	0.652	0.312	1.6	2.71	1.891	5.07	7.922	4.198	10.138	29.088	17.215
NM_007458	Ap2a1	-0.309	0.6	-0.033	0.011	0.244	0.186	1.594	5.049	1.87	2.185	4.926	5.565	5.28
NM_018862	Agpat1	0.528	0.064	0.94	0.147	2.844	1.309	7.483	4.985	0.047	0.029	1.281	8.644	4.182
NM_001310725	Kmt5a	0.005	0.003	0.192	0.069	1.636	2.573	1.732	4.981	4.441	4.155	4.997	14.558	11.911
NM_001001892	H2-K1	-0.546	1.09	-0.262	0.08	-0.348	0.175	2.007	4.963	3.845	5.32	20.759	15.082	17.095
NM_001002895	AI413582	-0.601	0.784	0.531	0.463	-0.583	0.672	1.724	4.853	2.497	3.534	12.636	8.037	5.219
NM_001168227	Morf4l2	0.078	0.074	0.276	0.111	1.099	1.389	1.764	4.769	5.517	4.875	9.151	18.513	14.202
NM_001360931	Ufc1	-1.519	1.862	0.273	0.168	-0.28	0.299	2.399	4.733	1.163	3.127	7.589	5.965	4.582
NM_001357721	Dnm2	0.123	0.13	0.118	0.047	0.888	1.5	1.594	4.73	2.62	2.26	4.433	7.824	6.695
NM_001145970	Map7d1	-0.359	0.86	0.563	0.354	0.891	1.359	1.681	4.726	6.955	8.367	12.376	22.028	13.804
NM_172444	Thsd4	1.256	9.319	0.798	0.471	1.11	1.891	1.631	4.607	6.683	2.61	9.911	20.431	10.972
NM_001271487	Rtn3	-0.15	0.061	1.407	0.84	2.708	1.515	4.101	4.516	0.484	0.51	1.33	8.18	2.859
NM_001357763	Mtch1	0.554	0.5	1.217	0.336	1.943	1.318	3.576	4.508	1.522	0.978	4.916	17.89	7.112
NM_001364934	Rps10	1.793	1.411	0.143	0.016	3.549	3.426	4.106	4.374	2.659	0.714	4.053	45.303	37.982
NM_001039392	Tmsb10	-0.159	0.108	0.4	0.273	0.54	0.685	1.588	4.192	2.647	2.763	5.607	7.788	5.484
NM_001044384	Timp1	-1.527	3.202	0.09	0.036	-0.519	0.583	1.848	4.177	1.424	3.859	7.614	5.103	4.438
NM_181650	Prdm4	-0.145	0.144	0.258	0.076	1.362	1.387	2.111	4.089	1.349	1.399	2.364	5.751	4.47
NM_001252528	Pqbp1	0	0	0.657	0.21	2.532	3.217	2.398	4.028	3.331	3.142	3.203	17.452	10.265
NM_001159483	Rpl19	0.782	1.175	0.59	0.265	1.592	2.735	1.799	4.013	7.056	3.835	8.369	24.276	14.985
NM_001163571	Senp3	-0.934	1.226	0.837	0.386	0.916	0.902	2.161	3.936	1.206	2.192	2.964	5.359	2.794
NM_001081490	Fbxo9	0.444	0.397	1.575	1.2	2.686	3.773	2.237	3.915	1.076	0.742	0.821	5.002	1.56
NM_001252537	Ciz1	0.469	0.346	0.686	0.359	0.839	0.738	1.988	3.915	1.304	0.892	2.976	5.126	2.941
NM_001364445	Tmem184c	-0.486	0.689	0.819	0.196	2.104	1.255	2.986	3.87	2.331	3.059	4.518	18.283	9.645
NM_001357760	Akap8	0.132	0.087	1.208	0.249	2.765	1.517	3.817	3.806	0.694	0.601	1.51	9.683	3.888
NM_010562	Ilk	-2.192	12.684	1.253	0.28	0.194	0.077	2.222	3.709	1.656	7.107	6.986	7.622	2.959
NM_017380	2021-09-09	-1.183	3.182	0.281	0.098	1.911	1.58	2.965	3.709	2.909	6.157	6.265	22.332	16.985
NM_001283013	Ptbp1	-0.739	1.328	1.259	0.213	3.606	2.169	4.327	3.619	0.737	1.15	1.269	14.717	5.7
NM_001290683	Smap1	-0.97	1.003	0.857	0.578	1.065	0.448	3.264	3.573	1.907	3.447	9.129	17.922	9.195
NM_001177606	0610010K14Rik	-0.81	0.442	0.778	0.419	1.546	0.973	2.441	3.539	1.001	1.639	1.973	5.386	2.914
NM_001347634	Ybx2	-0.624	0.627	0.345	0.09	3.065	3.821	2.281	3.536	1.231	1.784	0.715	5.939	4.324
NM_001271591	Rpl37rt	0.867	1.362	0.958	0.31	2.464	2.277	2.072	3.477	4.246	2.182	3.293	17.709	8.461
NM_001291481	Mdk	-0.596	2.64	0.374	0.064	2.083	1.639	2.829	3.477	30.429	42.926	52.737	214.206	152.81
NM_001276473	Cited1	5.79	3.106	5.628	1.518	4.19	1.886	5.156	3.199	0.718	0.015	1.488	25.629	0.485
NM_001329528	Gpx1	NA	NA	3.662	0.423	10.454	3.263	11.387	3.151	0	0	0.012	14.837	1.093
NM_001357955	Lrrc75a	0.61	0.546	1.145	0.24	1.519	1.53	1.878	3.124	2.647	1.613	3.563	9.563	4.057
NR_153396	Mphosph8	0.618	0.615	0.697	0.134	2.814	1.971	3.368	3.015	0.678	0.419	1.027	6.972	3.988
NM_001252293	Mest	-1.107	1.355	4.124	3.713	1.758	0.527	3.202	2.995	17.915	35.622	51.098	161.689	8.621
NM_178185.1	Hist1h2ap	NA	NA	2.112	0.174	10.797	2.587	10.767	2.995	0	0	0.006	20.107	4.312
NM_026611.1	Rnaset2b	-0.267	0.098	1.619	0.326	3.623	2.079	4.257	2.88	0.619	0.706	0.979	11.6	3.5
NM_001356334	Raf1	-0.688	0.817	0.845	0.408	1.315	1.3	1.851	2.806	1.875	2.881	2.809	6.726	3.444
NR_125731	Hipk1	-0.016	0.005	0.518	0.079	1.811	0.688	3.763	2.77	0.482	0.46	1.885	6.502	4.194
NM_001038231	Banf1	0.777	0.786	0.524	0.075	3.372	1.478	3.13	2.436	2.381	1.3	2.002	20.674	13.305
NM_178185	Hist1h2ap	-3.738	1.631	1.826	0.22	10.83	2.592	7.924	2.263	0.079	1.172	0.006	20.547	5.388
NM_001271590	Rpl37rt	-0.419	0.065	0.664	0.146	2.893	2.067	4.125	2.23	0.648	0.79	1.516	11.014	6.438
NM_001361533	Atp6v0c	-2.941	0.819	2.255	0.242	5.522	1.369	7.862	2.182	0.034	0.238	0.188	8.017	1.556
NM_001163395	Evl	-0.655	0.721	0.318	0.124	1.525	2.446	1.587	2.164	2.791	4.09	2.999	8.256	6.131
NR_039586	Mir5125	0.367	0.069	0.639	0.124	1.826	0.786	3.031	2.095	1.686	1.201	3.98	13.638	8.08
NM_001297747	Btg3	0.265	0.086	0.421	0.129	1.735	3.143	1.761	1.91	2.846	2.189	3.011	9.376	6.593
NM_001357307	Ubap2l	-0.037	0.041	0.535	0.257	1.21	1.641	1.683	1.821	8.024	7.707	11.47	25.399	16.28
NM_001289726	Gapdh	1.856	0.228	3.927	0.328	9.333	1.303	7.665	1.793	0.105	0.028	0.035	22.183	1.351
NM_001039137	Scoc	-0.771	0.222	1.551	0.965	1.976	0.69	4.065	1.73	0.533	0.875	2.44	8.984	2.849
NM_001355532	Ssbp3	0.138	0.106	-0.108	0.023	1.533	0.858	2.132	1.723	2.963	2.5	4.577	12.796	12.74
NR_002445	BC002163	1.467	0.782	1.131	0.523	2.093	1.814	2.885	1.683	3.661	1.207	6.399	26.94	11.396
NM_001285506	Rps6ka1	-0.283	0.084	0.544	0.365	1.166	1.148	2.717	1.673	0.85	0.952	2.604	5.454	3.493
NM_001360956	Wac	0.597	1.382	1.495	0.468	2.192	1.435	2.081	1.613	1.858	1.158	1.794	7.799	2.567
NM_001356595	Ube2d3	0.215	0.118	1.92	0.55	3.57	7.197	2.195	1.568	1.333	1.058	0.533	5.968	1.47
NM_001198792	Ak1	-0.254	0.036	0.991	2.049	-0.327	0.337	4.712	1.464	0.221	0.253	7.605	5.798	2.722
NM_001302215	Atp5j	0.376	0.222	1.814	0.96	1.886	1.087	1.713	1.349	2.702	1.968	2.535	8.828	2.32

## Sheet: 4-2 1.25-NPC down
TranscriptID	GeneSymbol	log2Fc.1	nlog10P.1	log2Fc.2	nlog10P.2	log2Fc.3	nlog10P.3	log2Fc.4	nlog10P.4	meanTPM.NPC	meanTPM.NFC	meanTPM.NPC_0uM	meanTPM.NPC_1.25uM	meanTPM.NPC_5uM
NM_010234	Fos	-0.678	3.383	-1.04	4.601	-1.13	4.243	-7.778	264.26	477.026	715.607	4.881	2.129	4.097
NM_010591	Jun	-0.086	0.158	-0.823	4.04	0.17	0.276	-3.936	244.63	155.746	156.742	9.314	10.011	16.561
NM_010516	Cyr61	-1.558	66.127	0.481	0.165	-1.435	31.98	-3.146	158.202	178.929	496.893	56.482	19.879	13.11
NM_009022	Aldh1a2	-1.554	54.555	-3.715	120.373	0.009	0.007	-2.945	141.673	146.838	405.298	19.656	18.735	230.424
NM_001033877	Adamts17	1.006	3.958	0.898	0.497	0.521	0.251	-5.692	124.58	7.692	3.57	0.107	0.148	0.074
NM_001033225	Pnrc1	0.068	0.415	-0.245	0.301	-0.373	1.784	-2.205	120.259	64.22	57.643	18.677	13.68	15.086
NM_001136072	Meis2	-0.233	1.934	0.647	0.741	-0.274	1.17	-2.023	114.358	31.243	34.445	9.618	7.546	4.472
NM_001159662	Ppp1r16b	2.222	76.068	-2.164	2.498	0.698	0.73	-4.043	107.703	10.599	2.137	0.404	0.63	2.669
NM_001029878	Lonrf2	1.34	17.891	0.022	0.005	-0.44	0.272	-4.626	107.392	5.612	2.073	0.321	0.222	0.207
NM_172589	Lhfpl2	0.284	1.198	-2.312	61.624	-0.405	1.448	-2.229	99.433	32.61	25.327	9.491	6.816	31.66
NM_026272	Narf	-0.102	0.251	0.555	2.241	-0.636	3.492	-2.761	96.248	20.992	21.111	4.991	3.038	1.934
NM_008812	Padi2	2.697	55.903	-2.04	2.492	0.74	2.215	-2.923	91.18	11.024	1.588	0.898	1.427	5.543
NM_008760	Ogn	-2.552	212.26	-0.228	0.056	-0.163	0.053	-5.196	90.687	10.163	56.128	0.32	0.273	0.295
NM_001360339	Fam107a	3.53	13.912	0.76	0.781	0.705	1.131	-3.694	86.745	19.731	1.572	0.965	1.504	0.826
NM_177152	Lrig3	0.446	8.042	-1.178	18.986	0.506	3.287	-1.919	84.384	35.102	24.278	6.76	9.111	19.29
NM_011303	Dhrs3	-1.683	40.464	0.74	0.154	-0.412	0.107	-6.734	80.499	12.973	39.161	0.169	0.118	0.065
NM_001042592	Arrdc4	1.588	24.107	-0.031	0.013	1.009	2.397	-3.565	79.759	16.14	5.072	0.703	1.335	1.279
NM_010791	Meox1	2.705	65.897	5.181	20.359	-1.791	12.144	-3.867	75.938	35.216	5.048	8.623	2.364	0.063
NM_008872	Plat	-0.104	0.605	-0.222	0.415	-0.598	2.698	-2.058	74.048	45.211	45.732	16.946	10.648	11.63
NM_018801	Syt7	1.247	11.657	1.004	1.649	0.361	0.212	-3.268	73.529	5.925	2.334	0.484	0.6	0.28
NM_008744	Ntn1	-2.181	50.875	-0.014	0.003	-0.603	1.069	-4.103	72.593	33.847	144.057	3.11	1.929	1.81
NM_009856	Cd83	-0.992	12.535	-1.074	1.403	0.663	0.412	-4.217	72.108	11.908	22.168	0.416	0.627	1.244
NM_008452	Klf2	-2.061	27.748	1.233	0.221	-1.922	1.24	-7.154	71.564	18.195	71.171	0.497	0.128	0.049
NM_013642	Dusp1	-0.673	7.645	-0.306	0.258	0.067	0.052	-2.766	69.521	27.674	41.626	3.995	4.007	4.596
NM_021509	Moxd1	2.86	96.561	0.404	0.267	0.359	0.55	-2.674	69.455	22.808	2.934	2.884	3.515	2.493
NM_008036	Fosb	-0.464	0.321	-1.478	0.964	-0.188	0.053	-10.048	68.589	137.422	177.226	0.151	0.124	0.336
NM_007498	Atf3	-1.293	16.118	-1.167	2.217	-0.347	0.224	-4.059	68.273	13.164	30.228	1.028	0.774	1.634
NM_013834	Sfrp1	-2.138	61.949	-1.346	2.086	0.636	1.3	-3.152	68.141	26.221	108.257	1.961	2.894	6.937
NM_010444	Nr4a1	-1.154	12.551	0.574	0.932	-0.345	0.562	-3.839	68.12	56.548	118.288	5.175	3.892	2.442
NM_001310464	Reln	-2.649	90.83	0.581	0.644	-0.615	3.145	-2.47	67.542	6.366	37.469	1.826	1.128	0.71
NM_009926	Col11a2	3.658	9.593	-0.945	0.388	-1.925	2.706	-5.819	66.393	8.309	0.606	0.576	0.143	0.256
NM_007431	Alpl	0.55	2.991	-3.712	22.66	1.45	2.057	-3.41	66.348	7.949	5.091	0.281	0.732	9.035
NM_001290308	Col12a1	-2.273	86.333	-1.126	0.249	-0.624	1.749	-2.962	66.3	10.819	49.038	2.205	1.367	2.727
NM_010499	Ier2	0.127	0.368	-0.597	1.582	-0.603	1.869	-3.144	66.075	277.872	238.869	49.192	30.812	43.759
NM_007570	Btg2	-0.459	2.031	-0.155	0.086	-0.678	2.406	-3.647	65.096	106.568	137.412	14.051	8.326	8.733
NM_001276489	Ism1	3.325	34.131	-3.107	84.336	0.642	2.294	-2.254	64.46	19.814	1.826	2.751	4.075	32.749
NM_007384	Asic2	0.935	14.756	0.406	0.275	-0.41	0.496	-3.065	63.856	8.019	3.942	1.312	0.943	0.667
NM_011243	Rarb	-1.39	35.52	0.983	0.413	-0.835	0.773	-4.585	62.592	11.135	27.543	0.855	0.45	0.214
NM_001109989	Nrep	-0.666	17.056	-0.275	0.363	-0.521	1.531	-1.822	61.594	90.009	134.017	37.868	24.979	28.143
NM_008343	Igfbp3	-2.631	66.81	-3.374	8.94	0.546	0.394	-4.362	60.709	11.075	64.764	0.384	0.532	5.085
NM_008654	Ppp1r15a	0.223	1.345	-0.346	0.706	-0.314	0.541	-2.344	59.63	42.025	33.871	10.574	8.125	9.661
NM_009291	Stra6	2.674	8.901	-1.422	0.591	-0.87	1.888	-3.151	59.152	6.671	0.957	1.421	0.731	1.809
NM_028882	Sema3d	-1.522	33.211	1.521	3.72	-1.442	5.894	-3.349	56.145	7.672	20.698	2.118	0.736	0.239
NM_001198565	Sulf1	2.162	19.941	1.781	2.958	-0.809	1.186	-3.465	54.423	7.77	1.648	1.266	0.695	0.188
NM_011756	Zfp36	-0.834	29.111	-0.032	0.013	0.021	0.023	-2.342	54.353	87.726	146.994	17.626	17.045	16.329
[truncated: 238 more rows]

[truncated: 1 more sheets: 5 TPM table]
