# Supplementary material for: A β-catenin-driven switch in TCF/LEF transcription factor binding to DNA target sites promotes commitment of mammalian nephron progenitor cells
Source: eLife. 2021 Feb 15;10:e64444. doi: 10.7554/eLife.64444 (PMC7924951; doi:10.7554/eLife.64444)
Supplement: Supplementary file 2. [file elife-64444-supp2.xlsx]

## Sheet: Notes
This table is related to Fig. 2 and S2
DAR threshold
1-2 and 1-3	2-2 and 2-3
log2Fc > 2	log2Fc > 0
P < 0.05	P-adj < 0.1
mean TPM > median	norm. counts > 0
Column names annotations
peakID	peak ID
chr	chromosome number
start	region left boundary
end	region right boundary
toTSS	distance from region center to nearest TSS
gene	gene symbol of nearest TSS
mean_Lo-C	mean normalized read count in Low CHIR samples
mean_Hi-C	mean normalized read count in High CHIR samples
log2FC	log2 fold change
log10padj	log10 adjusted p-value
mean_NPC	mean normalized read count in NPC samples
mean_No-C	mean normalized read count in No CHIR samples
mean_Lo-C	mean normalized read count in Low CHIR samples
mean_Hi-C	mean normalized read count in High CHIR samples
mean_NFC	mean normalized read count in NFC samples
NPC_r1	mean normalized read count in each sample
NPC_r2
NPC_r3
No-C_r1
No-C_r2
No-C_r3
Lo-C_r1
Lo-C_r2
Lo-C_r3
Hi-C_r1
Hi-C_r2
Hi-C_r3
NFC_r1
NFC_r2
NFC_r3
Each sheet except for sheet 1-1 and sheet 2-1 are generated based on the highlighted columns, and are ranked based on the negative log adjusted p-values.

## Sheet: 1-1 NPC vs NFC all
peakID	chr	start	end	toTSS	gene	mean_NPC	mean_NFC	log2FC	log10padj	mean_NPC	mean_No-C	mean_Lo-C	mean_Hi-C	mean_NFC	NPC_r1	NPC_r2	NPC_r3	No-C_r1	No-C_r2	No-C_r3	Lo-C_r1	Lo-C_r2	Lo-C_r3	Hi-C_r1	Hi-C_r2	Hi-C_r3	NFC_r1	NFC_r2	NFC_r3
58684	chr7	112810464	112811464	51580	Tead1	15.26	3.52	1.71	-1.42	15.26	6.9	8.46	8.37	3.52	15.57	15.03	15.19	7.14	7.26	6.31	9.85	9.9	5.64	6.13	10.59	8.39	2.67	3.68	4.2
58017	chr7	89386100	89387100	17622	Tmem135	34.79	17.65	0.6	-0.63	34.79	15.9	12.9	8.58	17.65	44.31	19.32	40.74	14.27	16.59	16.83	12.04	15.39	11.28	3.68	3.18	18.88	12.03	22.69	18.22
44919	chr4	48621855	48622855	37181	Tmeff1	20.56	7.94	0.98	-0.77	20.56	21.79	17.87	6.09	7.94	27.54	13.42	20.72	30.92	19.71	14.73	12.04	17.59	23.97	9.81	8.47	0	14.71	4.91	4.2
8563	chr10	121189764	121190764	12385	4930432O09Rik	4.47	11.53	-1.68	-1.33	4.47	9.49	10.19	5.5	11.53	3.59	4.29	5.52	10.7	8.3	9.47	6.57	9.9	14.1	4.91	5.29	6.29	6.02	11.04	17.52
28336	chr17	45573416	45574416	-655	Hsp90ab1	51.89	67.38	-0.72	-1.79	51.89	26.74	21.99	30.45	67.38	52.69	57.42	45.57	41.62	21.78	16.83	26.27	24.19	15.51	35.57	20.12	35.67	72.87	71.12	58.16
63406	chr9	9171077	9172077	-64711	Gm16833	22.43	15.1	0.18	-0.11	22.43	16.8	9.98	12.26	15.1	11.98	21.47	33.84	19.03	13.48	17.88	8.76	9.9	11.28	14.72	5.29	16.78	10.7	17.78	16.82
28801	chr17	62598410	62599410	282407	Efna5	11.13	28.05	-1.69	-2.33	11.13	5.51	5.96	9.18	28.05	21.56	2.15	9.67	7.14	5.19	4.21	3.28	13.19	1.41	8.59	8.47	10.49	24.07	25.75	34.33
5006	chr1	194089807	194090807	132452	4930503O07Rik	13.64	9.74	0.14	-0.06	13.64	9.28	7	8.95	9.74	16.77	9.66	14.5	14.27	6.22	7.36	9.85	5.5	5.64	3.68	8.47	14.69	4.01	9.81	15.41
55548	chr6	135674021	135675021	15608	4930425L21Rik	15.34	7.28	0.72	-0.46	15.34	4.43	9.41	3.05	7.28	11.98	16.1	17.95	5.95	2.07	5.26	8.76	11	8.46	4.91	4.24	0	2.67	7.97	11.21
62374	chr8	103623487	103624487	20188	4933400L20Rik	9.58	7.26	0.04	-0.01	9.58	10.23	10.29	10.05	7.26	10.78	9.66	8.29	11.89	9.33	9.47	6.57	8.8	15.51	12.26	7.41	10.49	10.03	6.13	5.61
31922	chr18	78392792	78393792	-186852	Slc14a2	34.45	10.53	1.31	-1.73	34.45	20.82	14.42	7.96	10.53	41.92	28.98	32.45	23.79	18.67	19.99	14.23	21.99	7.05	12.26	7.41	4.2	16.71	3.68	11.21
3509	chr1	151167302	151168302	29768	C730036E19Rik	28.42	18.5	0.26	-0.21	28.42	10.87	13.62	17.44	18.5	34.73	23.61	26.93	10.7	12.45	9.47	22.99	6.6	11.28	19.62	18	14.69	18.72	22.07	14.71
18581	chr13	106199357	106200357	737101	Ipo11	11.57	34.85	-1.95	-4.13	11.57	2.23	2.87	3.45	34.85	7.19	17.17	10.36	3.57	3.11	0	1.09	3.3	4.23	6.13	2.12	2.1	35.43	36.18	32.93
67525	chrX	96129821	96130821	34276	Msn	14.81	6.2	0.85	-0.57	14.81	8.14	9.15	6.09	6.2	20.36	12.34	11.74	11.89	7.26	5.26	5.47	12.1	9.87	9.81	8.47	0	4.68	5.52	8.41
35097	chr2	32486904	32487904	-35934	Slc25a25	10.67	25.28	-1.6	-2.59	10.67	12.05	8.46	11.22	25.28	11.98	9.66	10.36	14.27	13.48	8.41	12.04	7.7	5.64	14.72	6.35	12.59	22.06	25.75	28.03
64576	chr9	51334988	51335988	-6571	1810046K07Rik	15.08	13.82	-0.22	-0.12	15.08	11.63	12.64	8.5	13.82	7.19	16.64	21.41	20.22	4.15	10.52	9.85	15.39	12.69	8.59	12.71	4.2	14.04	14.1	13.31
1387	chr1	60669063	60670063	-76825	Cd28	22.22	9.86	0.86	-0.77	22.22	4.86	5.64	5.91	9.86	21.56	20.93	24.17	8.32	3.11	3.16	4.38	5.5	7.05	6.13	7.41	4.2	9.36	15.33	4.9
1785	chr1	73929005	73930005	-65039	6030407O03Rik	15.95	5	1.23	-0.94	15.95	10.5	12.28	15.91	5	9.58	18.25	20.03	9.51	6.22	15.78	8.76	15.39	12.69	17.17	15.88	14.69	6.69	5.52	2.8
66454	chr9	116762236	116763236	489747	Rbms3	36.5	12.45	1.21	-1.87	36.5	12.46	13.01	7.13	12.45	34.73	30.59	44.19	15.46	12.45	9.47	13.14	13.19	12.69	9.81	5.29	6.29	14.04	13.49	9.81
51599	chr5	137745686	137746686	217	Tsc22d4	75.61	60.9	-0.04	-0.04	75.61	50.23	39.49	40.32	60.9	85.03	76.21	65.6	71.36	42.52	36.81	41.6	37.39	39.47	29.44	28.59	62.94	52.82	76.64	53.25
18324	chr13	98476125	98477125	-41560	2310005E17Rik	12.87	40.07	-2.01	-4.57	12.87	11.57	8.88	6.02	40.07	4.79	14.49	19.33	10.7	12.45	11.57	6.57	8.8	11.28	8.59	3.18	6.29	30.08	45.99	44.14
19092	chr14	7909113	7910113	84569	Dnase1l3	14.59	7.43	0.66	-0.42	14.59	5.21	7	3.45	7.43	16.77	16.64	10.36	8.32	3.11	4.21	10.95	4.4	5.64	6.13	2.12	2.1	8.02	7.97	6.31
43297	chr3	142710298	142711298	9750	Kyat3	10.92	17.77	-1.09	-1.08	10.92	12.37	8.94	11.28	17.77	8.38	11.27	13.12	13.08	12.45	11.57	8.76	11	7.05	8.59	8.47	16.78	13.37	14.72	25.22
6531	chr10	58497536	58498536	99	Ccdc138	107.51	93.88	-0.16	-0.29	107.51	73.73	72.66	55.16	93.88	117.36	96.07	109.1	101.09	61.19	58.9	74.44	75.87	67.67	60.1	52.94	52.45	98.94	99.33	83.38
7022	chr10	73543625	73544625	-277742	Pcdh15	6.34	14.97	-1.59	-0.63	6.34	2.97	2.3	1.41	14.97	0	5.9	13.12	4.76	3.11	1.05	1.09	4.4	1.41	0	2.12	2.1	11.37	15.33	18.22
50689	chr5	107687836	107688836	15144	4930428O21Rik	44.05	42.75	-0.31	-0.4	44.05	20.9	26.94	18.91	42.75	49.1	40.25	42.81	26.16	19.71	16.83	31.74	20.89	28.2	20.85	21.18	14.69	41.45	49.66	37.14
29393	chr17	81411979	81412979	325908	Slc8a1	29.62	6.29	1.86	-2.49	29.62	12.3	18.59	9.19	6.29	41.92	19.32	27.62	20.22	9.33	7.36	21.89	19.79	14.1	8.59	10.59	8.39	8.02	7.36	3.5
27084	chr16	96353680	96354680	-7577	Igsf5	18.37	5.57	1.41	-1.23	18.37	8.06	10.19	3.7	5.57	26.35	12.88	15.88	9.51	5.19	9.47	6.57	9.9	14.1	3.68	7.41	0	4.01	4.29	8.41
1638	chr1	69686928	69687928	-1468	Ikzf2	86.28	62.23	0.1	-0.13	86.28	31.15	22.3	25.09	62.23	87.42	74.06	97.36	46.38	19.71	27.35	22.99	14.29	29.61	33.11	23.29	18.88	58.83	61.31	66.56
60944	chr8	47826616	47827616	2634	Cldn22	22.38	4.3	1.98	-1.93	22.38	4.86	5.44	4.33	4.3	29.94	17.17	20.03	8.32	3.11	3.16	3.28	8.8	4.23	2.45	6.35	4.2	8.69	0	4.2
52393	chr6	15862591	15863591	142430	Mdfic	8.87	24.24	-1.86	-2.99	8.87	3.18	4.44	2.58	24.24	7.19	6.98	12.43	1.19	4.15	4.21	3.28	4.4	5.64	2.45	3.18	2.1	23.4	22.69	26.63
58979	chr7	122670500	122671500	-744	Cacng3	31.33	31.28	-0.35	-0.37	31.33	22.03	15.88	18.75	31.28	28.74	34.88	30.38	28.54	22.82	14.73	15.33	15.39	16.92	18.4	10.59	27.27	34.1	33.11	26.63
38711	chr2	158316675	158317675	10682	Lbp	13.37	26.64	-1.33	-2.09	13.37	6.05	8.04	4.91	26.64	15.57	10.73	13.81	3.57	10.37	4.21	9.85	4.4	9.87	7.36	3.18	4.2	30.08	23.91	25.92
35309	chr2	38822686	38823686	-29549	Mir181a-2	65.33	57.45	-0.17	-0.21	65.33	43.57	32.91	32.46	57.45	80.24	51.52	64.22	61.84	39.41	29.45	36.12	32.99	29.61	40.47	29.65	27.27	51.48	71.12	49.75
2203	chr1	88678034	88679034	23657	Arl4c	22.3	5.14	1.79	-1.9	22.3	5.89	4.7	5.68	5.14	31.14	15.03	20.72	8.32	7.26	2.1	3.28	6.6	4.23	8.59	4.24	4.2	5.35	3.07	7.01
40253	chr3	36689098	36690098	569	Trpc3	55.07	56.44	-0.39	-0.63	55.07	19.6	17.19	23.56	56.44	43.11	50.98	71.12	28.54	16.59	13.67	14.23	17.59	19.74	23.3	20.12	27.27	50.81	68.06	50.45
39508	chr2	181365083	181366083	160	Zgpat	73.4	55.13	0.06	-0.07	73.4	46.42	43.15	42.87	55.13	80.24	68.16	71.81	63.03	38.37	37.87	30.65	39.58	59.21	52.74	38.12	37.76	43.46	63.77	58.16
36581	chr2	85725464	85726464	4557	Olfr1009	10.13	17.93	-1.22	-1.32	10.13	3.68	5.8	6.43	17.93	8.38	7.51	14.5	4.76	2.07	4.21	7.66	5.5	4.23	2.45	4.24	12.59	20.06	19.01	14.71
11648	chr11	95823812	95824812	-188	Phospho1	36.87	43	-0.59	-0.97	36.87	20.64	20.95	16.37	43	37.13	27.91	45.57	28.54	19.71	13.67	25.18	26.39	11.28	19.62	12.71	16.78	46.13	42.92	39.94
62930	chr8	120067632	120068632	33340	Zdhhc7	23.4	14.07	0.37	-0.28	23.4	16.48	15.2	13.91	14.07	23.95	19.32	26.93	20.22	15.56	13.67	17.51	15.39	12.69	19.62	9.53	12.59	14.71	13.49	14.01
22961	chr15	50606702	50607702	281847	Trps1	20.21	11.47	0.47	-0.34	20.21	9.14	11.69	11.99	11.47	14.37	24.15	22.1	10.7	7.26	9.47	17.51	7.7	9.87	15.94	9.53	10.49	9.36	11.04	14.01
33090	chr19	29100623	29101623	-252	Rcl1	101.79	103.62	-0.38	-1.05	101.79	69.16	62.79	56.1	103.62	104.19	95.53	105.65	108.22	47.71	51.54	52.54	68.17	67.67	50.29	55.06	62.94	98.28	110.98	101.6
50339	chr5	97111174	97112174	-78	Paqr3	117.82	106.92	-0.21	-0.4	117.82	67.05	65.5	69.56	106.92	137.72	112.17	103.58	98.71	44.6	57.85	63.49	58.28	74.72	61.32	55.06	92.31	98.28	125.08	97.39
15874	chr13	8202571	8203571	205	Adarb2	81.94	49.34	0.38	-0.68	81.94	24.49	32.85	29.31	49.34	89.82	72.45	83.55	28.54	21.78	23.14	39.41	25.29	33.84	40.47	26.47	20.98	36.77	60.09	51.15
13766	chr12	47727452	47728452	-909177	Nova1	4.34	16.51	-2.17	-2.25	4.34	1.04	1.2	0.35	16.51	0	7.51	5.52	0	2.07	1.05	0	2.2	1.41	0	1.06	0	13.37	16.55	19.62
55465	chr6	131512995	131513995	27089	LOC102638913	12.35	9.94	-0.09	-0.04	12.35	1.89	4.18	0.35	9.94	11.98	6.44	18.64	3.57	1.04	1.05	4.38	1.1	7.05	0	1.06	0	10.03	8.58	11.21
57658	chr7	75515171	75516171	60137	Akap13	11.96	38.13	-2.06	-5.11	11.96	7.97	8.73	6.66	38.13	13.17	12.34	10.36	7.14	5.19	11.57	3.28	8.8	14.1	7.36	2.12	10.49	34.76	36.18	43.44
34468	chr2	11776945	11777945	140	Fbxo18	163.85	163.3	-0.36	-1.3	163.85	105.38	101.93	112.06	163.3	180.84	137.39	173.32	142.71	81.93	91.51	93.05	115.46	97.28	98.12	105.88	132.17	176.5	165.55	147.84
61163	chr8	57569135	57570135	57792	Hmgb2	31.27	16.07	0.53	-0.44	31.27	19.74	12.07	14.85	16.07	25.15	18.25	50.41	22.6	13.48	23.14	12.04	14.29	9.87	24.53	9.53	10.49	20.72	8.58	18.92
30706	chr18	38801907	38802907	-90049	Gm5820	15.77	17.93	-0.52	-0.43	15.77	14.1	14.78	13.44	17.93	13.17	18.25	15.88	21.41	10.37	10.52	12.04	15.39	16.92	9.81	9.53	20.98	16.05	15.33	22.42
26317	chr16	67423649	67424649	196759	Cadm2	13.65	8.33	0.3	-0.15	13.65	4.83	3.08	1.05	8.33	9.58	13.42	17.95	7.14	0	7.36	1.09	1.1	7.05	0	1.06	2.1	8.69	8.58	7.71
9968	chr11	41256760	41257760	-501974	Ccng1	5.51	17.59	-2.09	-2.41	5.51	2.19	2.77	2.57	17.59	2.4	3.76	10.36	2.38	1.04	3.16	2.19	3.3	2.82	2.45	1.06	4.2	15.38	22.69	14.71
65773	chr9	94136227	94137227	401354	1190002N15Rik	6.42	23.04	-2.22	-3.56	6.42	4.17	3.6	6.31	23.04	8.38	5.37	5.52	0	7.26	5.26	5.47	1.1	4.23	7.36	3.18	8.39	21.39	23.91	23.82
58935	chr7	121077485	121078485	-3455	Igsf6	18.26	13	0.15	-0.08	18.26	7.39	9.67	6.79	13	29.94	9.66	15.19	10.7	7.26	4.21	4.38	7.7	16.92	9.81	6.35	4.2	17.38	10.42	11.21
40979	chr3	63975755	63976755	112	Gmps	98.54	86.01	-0.18	-0.28	98.54	57.24	63.51	56.77	86.01	107.78	69.77	118.08	88.01	31.11	52.59	64.58	58.28	67.67	65	44.47	60.84	96.27	74.19	87.58
5464	chr10	17101794	17102794	-6512	Gm20125	13.39	10.74	-0.04	-0.02	13.39	8.46	6.11	4.62	10.74	13.17	11.81	15.19	10.7	4.15	10.52	3.28	6.6	8.46	1.23	6.35	6.29	11.37	11.04	9.81
47439	chr4	136696222	136697222	74101	Lactbl1	9.68	9.41	-0.38	-0.19	9.68	10.39	6.74	7.55	9.41	13.17	4.83	11.05	7.14	10.37	13.67	7.66	5.5	7.05	3.68	8.47	10.49	10.7	9.81	7.71
54201	chr6	88445901	88446901	138	Eefsec	27.5	21.16	0.04	-0.02	27.5	16.95	16.93	21.34	21.16	34.73	23.61	24.17	22.6	11.41	16.83	18.61	20.89	11.28	20.85	18	25.18	27.41	22.07	14.01
48954	chr5	36300629	36301629	-441	Mir7689	24.85	6.81	1.46	-1.72	24.85	10.12	12.38	11.01	6.81	25.15	25.22	24.17	9.51	12.45	8.41	9.85	13.19	14.1	9.81	14.82	8.39	8.69	6.13	5.61
43071	chr3	135628373	135629373	62674	Nfkb1	59.1	26.8	0.79	-1.54	59.1	24.86	28.84	28.09	26.8	63.47	50.98	62.84	38.06	20.74	15.78	30.65	31.89	23.97	29.44	29.65	25.18	22.06	33.11	25.22
55109	chr6	120579161	120580161	24865	1700072O05Rik	32.03	19.78	0.3	-0.27	32.03	13.71	16.41	10.05	19.78	34.73	22	39.36	11.89	15.56	13.67	14.23	20.89	14.1	12.26	7.41	10.49	20.72	19.01	19.62
39494	chr2	181008013	181009013	21978	Col20a1	33.83	8.13	1.67	-2.56	33.83	24.3	27.99	19.3	8.13	45.51	26.3	29.69	33.3	26.97	12.62	28.46	23.09	32.43	22.08	16.94	18.88	6.69	8.58	9.11
47380	chr4	135206010	135207010	66250	Clic4	9.95	14.26	-0.88	-0.7	9.95	9.14	5.27	11.59	14.26	8.38	11.81	9.67	10.7	8.3	8.41	5.47	3.3	7.05	7.36	12.71	14.69	16.05	9.2	17.52
64626	chr9	53427352	53428352	22566	4930550C14Rik	7.22	22.98	-2.01	-2.99	7.22	4.42	7.11	3.69	22.98	10.78	5.37	5.52	5.95	4.15	3.16	6.57	7.7	7.05	3.68	3.18	4.2	16.05	26.98	25.92
55814	chr6	143190764	143191764	24034	Etnk1	57.43	21.4	1.05	-2.06	57.43	35.05	35.94	25.87	21.4	67.06	42.4	62.84	48.76	29.04	27.35	26.27	40.68	40.88	34.34	28.59	14.69	22.06	14.1	28.03
65059	chr9	67633553	67634553	-74350	Tln2	18.2	19.04	-0.41	-0.28	18.2	6.75	10.76	7.96	19.04	7.19	27.37	20.03	11.89	5.19	3.16	16.42	8.8	7.05	4.91	8.47	10.49	21.39	19.62	16.12
20873	chr14	74947421	74948421	-44	Lrch1	29.34	27.49	-0.26	-0.24	29.34	17.46	14.79	25.08	27.49	26.35	25.76	35.91	27.35	14.52	10.52	8.76	18.69	16.92	18.4	21.18	35.67	28.08	31.27	23.12
45028	chr4	53462622	53463622	22709	Slc44a1	22.3	7.76	1.11	-1.02	22.3	10.35	13.32	16.31	7.76	15.57	16.1	35.22	14.27	4.15	12.62	9.85	13.19	16.92	11.04	12.71	25.18	6.02	11.65	5.61
62396	chr8	104122802	104123802	-17429	Gm29682	40.79	7.08	2.09	-3.8	40.79	8.3	7.21	11.36	7.08	41.92	25.22	55.24	7.14	8.3	9.47	5.47	7.7	8.46	9.81	15.88	8.39	4.68	6.74	9.81
51109	chr5	122263734	122264734	226	Tctn1	50.11	55.78	-0.5	-0.95	50.11	28.21	20.63	23.11	55.78	49.1	51.52	49.72	42.81	18.67	23.14	21.89	23.09	16.92	13.49	26.47	29.37	55.49	55.8	56.05
23311	chr15	63340075	63341075	139033	Gm20740	25.27	72.76	-1.86	-7.31	25.27	11.78	11.38	18.43	72.76	16.77	34.88	24.17	15.46	8.3	11.57	17.51	11	5.64	18.4	18	18.88	66.85	72.96	78.47
59305	chr7	133401784	133402784	199831	Tex36	13.8	8.47	0.29	-0.14	13.8	4.97	4.96	10.71	8.47	13.17	12.34	15.88	2.38	7.26	5.26	6.57	5.5	2.82	11.04	12.71	8.39	10.7	4.91	9.81
46758	chr4	116707968	116708968	-83	Mmachc	66.19	71.01	-0.47	-1	66.19	53.73	44.41	41.75	71.01	56.29	60.11	82.17	79.68	38.37	43.13	43.79	52.78	36.66	44.15	34.94	46.16	61.51	77.26	74.27
58902	chr7	119848774	119849774	46184	Dcun1d3	17.91	9.24	0.57	-0.39	17.91	5.89	6.63	4.32	9.24	14.37	19.32	20.03	8.32	7.26	2.1	8.76	5.5	5.64	2.45	2.12	8.39	4.68	10.42	12.61
28275	chr17	44078452	44079452	150	Enpp5	35.47	22.82	0.28	-0.25	35.47	14.95	13.89	16.96	22.82	33.53	25.22	47.65	16.65	13.48	14.73	21.89	9.9	9.87	17.17	16.94	16.78	22.73	23.3	22.42
1354	chr1	59515741	59516741	-23	Gm973	38.82	27.87	0.13	-0.1	38.82	11.52	15.83	19.51	27.87	35.93	37.03	43.5	17.84	8.3	8.41	14.23	12.1	21.15	19.62	9.53	29.37	20.72	35.56	27.33
44020	chr4	10849542	10850542	-4412	Mir3471-1	28.18	8.54	1.33	-1.54	28.18	5.96	4.96	5.15	8.54	37.13	17.71	29.69	9.51	4.15	4.21	5.47	6.6	2.82	4.91	6.35	4.2	10.03	3.68	11.91
23574	chr15	75920927	75921927	133	Pycrl	32.41	38.62	-0.59	-0.67	32.41	24.24	19.01	24.93	38.62	13.17	44.01	40.05	30.92	18.67	23.14	17.51	19.79	19.74	30.66	8.47	35.67	44.12	37.4	34.33
8	chr1	3645445	3646445	25553	Xkr4	10.99	11.55	-0.46	-0.26	10.99	9.78	7.05	2.8	11.55	7.19	11.27	14.5	9.51	10.37	9.47	3.28	6.6	11.28	0	2.12	6.29	15.38	7.36	11.91
15700	chr12	118291538	118292538	9402	Sp4	17.81	5.65	1.29	-1.11	17.81	4.47	6.38	5.73	5.65	16.77	11.81	24.86	7.14	2.07	4.21	4.38	7.7	7.05	2.45	6.35	8.39	6.02	6.74	4.2
41629	chr3	88157566	88158566	15694	Mef2d	18.02	13.77	0.05	-0.02	18.02	16.44	9.04	13.94	13.77	13.17	18.78	22.1	19.03	15.56	14.73	9.85	8.8	8.46	12.26	19.06	10.49	15.38	19.62	6.31
11763	chr11	98438387	98439387	101	Mien1	28.01	35.72	-0.7	-1.03	28.01	17.52	13.89	22.88	35.72	22.75	34.35	26.93	28.54	12.45	11.57	16.42	15.39	9.87	15.94	27.53	25.18	39.44	36.18	31.53
9683	chr11	31713506	31714506	-42144	Bod1	22.27	7.77	1.14	-1.14	22.27	17.61	18.28	9.49	7.77	15.57	23.61	27.62	22.6	19.71	10.52	19.7	15.39	19.74	7.36	14.82	6.29	8.69	5.52	9.11
32837	chr19	21653099	21654099	290	Abhd17b	118.61	113.02	-0.3	-0.74	118.61	29.77	34.94	36.57	113.02	129.34	89.09	137.41	47.57	22.82	18.93	41.6	30.79	32.43	30.66	39.18	39.86	101.62	128.15	109.3
27834	chr17	28172094	28173094	-4602	Zfp523	22.59	12.63	0.48	-0.33	22.59	27.43	23.83	12.01	12.63	28.74	20.39	18.64	41.62	23.85	16.83	17.51	28.59	25.38	8.59	19.06	8.39	10.03	6.13	21.72
19071	chr14	6604717	6605717	151840	Gm3636	10.23	5.13	0.65	-0.29	10.23	1.19	1.83	6.43	5.13	5.99	15.03	9.67	3.57	0	0	3.28	2.2	0	2.45	6.35	10.49	0.67	9.81	4.9
16073	chr13	16497711	16498711	-474788	B230303A05Rik	12.67	7.67	0.36	-0.16	12.67	4.48	4.96	4.1	7.67	22.75	6.98	8.29	7.14	1.04	5.26	7.66	4.4	2.82	4.91	5.29	2.1	4.01	9.2	9.81
63479	chr9	13592569	13593569	-26920	Maml2	20.57	4.27	1.89	-1.87	20.57	11.85	11.91	7.49	4.27	26.35	18.78	16.57	17.84	11.41	6.31	13.14	9.9	12.69	9.81	8.47	4.2	6.69	1.23	4.9
4094	chr1	167024557	167025557	23640	Fam78b	49.9	32.33	0.28	-0.31	49.9	15.84	11.08	9.13	32.33	59.88	35.96	53.86	21.41	13.48	12.62	8.76	13.19	11.28	7.36	11.65	8.39	23.4	34.34	39.24
48656	chr5	24394036	24395036	380	Abcb8	91.28	71.54	-0.02	-0.02	91.28	53.41	45.49	49.71	71.54	119.76	62.25	91.84	72.55	48.75	38.92	43.79	36.29	56.39	41.7	46.59	60.84	74.21	66.83	73.57
44059	chr4	11733855	11734855	-23802	Cdh17	29.37	10.49	1.09	-1.33	29.37	14.69	15.51	15.16	10.49	32.33	19.86	35.91	19.03	13.48	11.57	18.61	11	16.92	15.94	19.06	10.49	10.7	11.65	9.11
13581	chr12	39974636	39975636	62240	Arl4a	16.3	13.01	0.02	-0.01	16.3	14.75	14.73	12.91	13.01	10.78	18.78	19.33	20.22	11.41	12.62	13.14	9.9	21.15	13.49	6.35	18.88	11.37	12.26	15.41
43367	chr3	144669972	144670972	49863	Sh3glb1	17.17	8.39	0.67	-0.45	17.17	10.07	11.28	16.02	8.39	22.75	8.05	20.72	16.65	7.26	6.31	19.7	9.9	4.23	12.26	14.82	20.98	10.03	6.74	8.41
32015	chr18	81153544	81154544	-167466	Sall3	10.59	4.99	0.74	-0.38	10.59	5.17	5.7	2.52	4.99	11.98	8.05	11.74	7.14	4.15	4.21	4.38	9.9	2.82	1.23	2.12	4.2	2.01	7.36	5.61
29187	chr17	74020227	74021227	27189	Srd5a2	19.18	17.14	-0.17	-0.11	19.18	8.84	10.24	11.51	17.14	15.57	19.86	22.1	11.89	6.22	8.41	8.76	12.1	9.87	6.13	9.53	18.88	16.05	12.26	23.12
40179	chr3	34330582	34331582	-229299	Sox2ot	36.86	9.66	1.62	-2.77	36.86	9.03	9.14	11.45	9.66	34.73	36.49	39.36	8.32	11.41	7.36	7.66	9.9	9.87	19.62	6.35	8.39	7.35	10.42	11.21
57753	chr7	79300386	79301386	27620	Abhd2	18.24	9.89	0.47	-0.31	18.24	8.44	10.45	8.82	9.89	20.36	10.2	24.17	10.7	8.3	6.31	9.85	8.8	12.69	8.59	5.29	12.59	9.36	9.81	10.51
23416	chr15	67282810	67283810	56541	1700012I11Rik	5.52	11.85	-1.4	-1.13	5.52	8.93	6.68	5.09	11.85	3.59	5.37	7.6	14.27	8.3	4.21	12.04	6.6	1.41	3.68	5.29	6.29	9.36	12.88	13.31
52786	chr6	32280372	32281372	-230269	Plxna4os1	16.07	5.89	1.18	-0.95	16.07	5.85	5.53	2.93	5.89	16.77	15.56	15.88	7.14	7.26	3.16	7.66	3.3	5.64	2.45	4.24	2.1	4.01	7.36	6.31
35502	chr2	49771915	49772915	-15271	Lypd6b	25.71	7.6	1.36	-1.6	25.71	14.52	13.69	10.23	7.6	26.35	20.39	30.38	23.79	14.52	5.26	8.76	15.39	16.92	15.94	6.35	8.39	6.69	9.81	6.31
53263	chr6	49716148	49717148	-106062	Npy	13.84	12.58	-0.26	-0.15	13.84	5.61	3.4	4.32	12.58	14.37	11.27	15.88	9.51	4.15	3.16	3.28	5.5	1.41	2.45	2.12	8.39	16.71	9.81	11.21
29918	chr18	9814146	9815146	106998	Colec12	35.52	17.93	0.61	-0.69	35.52	19.26	25.4	22.5	17.93	27.54	27.91	51.1	20.22	20.74	16.83	16.42	32.99	26.79	23.3	16.94	27.27	20.06	19.01	14.71
49660	chr5	66948811	66949811	-19105	Limch1	42.8	15.32	1.15	-1.98	42.8	14.92	16.4	7.78	15.32	46.71	30.59	51.1	24.97	13.48	6.31	16.42	18.69	14.1	8.59	6.35	8.39	13.37	17.17	15.41
32042	chr18	82567377	82568377	13369	Mbp	10.27	11.45	-0.48	-0.25	10.27	9.13	6.89	9.54	11.45	16.77	11.27	2.76	10.7	9.33	7.36	13.14	3.3	4.23	8.59	9.53	10.49	12.03	10.42	11.91
15984	chr13	12546817	12547817	-18566	Ero1lb	22.25	7.59	1.15	-1.06	22.25	5.91	5.06	5.97	7.59	14.37	17.17	35.22	8.32	4.15	5.26	7.66	3.3	4.23	7.36	6.35	4.2	7.35	9.81	5.61
8091	chr10	106631848	106632848	-180	Ppfia2	19.22	19.74	-0.39	-0.31	19.22	6.35	4.7	1.93	19.74	16.77	18.78	22.1	10.7	5.19	3.16	4.38	5.5	4.23	3.68	2.12	0	23.4	19.01	16.82
41777	chr3	92317161	92318161	956	Sprr2b	29.27	6.64	1.77	-2.44	29.27	4.78	7.74	8.89	6.64	28.74	25.22	33.84	5.95	2.07	6.31	5.47	12.1	5.64	17.17	7.41	2.1	10.03	4.29	5.61
48848	chr5	32345870	32346870	-7210	Plb1	89.19	39.09	0.81	-2.13	89.19	41.73	47.49	16.91	39.09	106.59	62.25	98.74	59.46	38.37	27.35	43.79	54.98	43.7	15.94	18	16.78	40.11	38.63	38.54
36168	chr2	72389637	72390637	-86082	Cdca7	10.96	10.86	-0.36	-0.2	10.96	8.34	8	8.14	10.86	10.78	9.66	12.43	8.32	8.3	8.41	8.76	11	4.23	8.59	9.53	6.29	12.7	12.88	7.01
60436	chr8	31025574	31026574	-63453	Dusp26	16.74	13.56	-0.03	-0.01	16.74	6.95	8.88	5.84	13.56	16.77	18.25	15.19	8.32	6.22	6.31	7.66	7.7	11.28	4.91	2.12	10.49	12.03	10.42	18.22
2479	chr1	99560954	99561954	-211311	Cntnap5b	27.92	5.91	1.88	-2.62	27.92	12.72	10.08	1.58	5.91	33.53	24.69	25.55	13.08	11.41	13.67	9.85	7.7	12.69	3.68	1.06	0	4.68	6.74	6.31
47858	chr4	149821807	149822807	-48040	Slc25a33	21.7	20.92	-0.34	-0.28	21.7	7	4.44	8.41	20.92	25.15	17.17	22.79	9.51	6.22	5.26	4.38	3.3	5.64	7.36	5.29	12.59	20.72	24.53	17.52
28181	chr17	37840279	37841279	5868	Olfr125	36.79	4.83	2.62	-4.4	36.79	13.89	11.23	2.45	4.83	31.14	29.52	49.72	16.65	15.56	9.47	14.23	11	8.46	0	1.06	6.29	1.34	6.13	7.01
68001	chrX	142390092	142391092	-57	Acsl4	91.37	77.02	-0.11	-0.15	91.37	58.44	58.13	56.49	77.02	89.82	86.94	97.36	101.09	31.11	43.13	63.49	51.68	59.21	58.87	47.65	62.94	65.52	87.07	78.47
46909	chr4	120815304	120816304	-91	Nfyc	44.61	52.48	-0.59	-1.15	44.61	25.09	23.39	13.92	52.48	52.69	34.88	46.27	34.49	16.59	24.19	31.74	18.69	19.74	12.26	12.71	16.78	55.49	51.5	50.45
11633	chr11	95514079	95515079	-14	Nxph3	23.6	24.6	-0.44	-0.45	23.6	14.13	18.23	17.96	24.6	21.56	20.93	28.31	22.6	14.52	5.26	22.99	17.59	14.1	15.94	19.06	18.88	24.74	24.53	24.52
28725	chr17	57724776	57725776	-44294	Cntnap5c	9.64	10.4	-0.47	-0.26	9.64	2.59	2.04	1.52	10.4	11.98	5.9	11.05	3.57	1.04	3.16	0	3.3	2.82	2.45	2.12	0	12.03	7.97	11.21
58520	chr7	107637645	107638645	-27333	Ppfibp2	46.43	12.24	1.54	-3.02	46.43	19.66	25.75	18.38	12.24	52.69	32.74	53.86	21.41	21.78	15.78	27.37	23.09	26.79	24.53	22.23	8.39	14.04	7.97	14.71
57062	chr7	49462156	49463156	174179	Dbx1	44.17	17.05	0.99	-1.5	44.17	18.03	12.28	11.76	17.05	59.88	28.44	44.19	23.79	15.56	14.73	12.04	12.1	12.69	11.04	11.65	12.59	20.06	12.88	18.22
1973	chr1	79761067	79762067	202	Wdfy1	53.81	54.54	-0.4	-0.6	53.81	41.43	32.5	32.74	54.54	50.3	38.64	72.5	59.46	26.97	37.87	29.56	34.09	33.84	39.25	23.29	35.67	40.11	57.64	65.86
58958	chr7	121935787	121936787	45406	Cog7	9.95	26.71	-1.76	-3.04	9.95	6.22	10.29	11.88	26.71	8.38	11.81	9.67	7.14	4.15	7.36	7.66	7.7	15.51	13.49	13.76	8.39	25.4	28.82	25.92
49503	chr5	61646413	61647413	-161930	G6pd2	8.09	26.31	-2.05	-3.56	8.09	4.37	3.4	1.76	26.31	4.79	9.12	10.36	4.76	4.15	4.21	4.38	4.4	1.41	0	3.18	2.1	23.4	28.2	27.33
45050	chr4	54292735	54293735	467190	Tmem38b	19.71	5.16	1.59	-1.41	19.71	3.88	5.91	2.53	5.16	25.15	9.12	24.86	1.19	5.19	5.26	3.28	8.8	5.64	1.23	6.35	0	4.01	3.07	8.41
58857	chr7	118383506	118384506	59554	Syt17	11.49	4.72	0.99	-0.51	11.49	3.72	3.77	9.87	4.72	10.78	16.1	7.6	5.95	3.11	2.1	2.19	7.7	1.41	8.59	4.24	16.78	8.02	6.13	0
42339	chr3	109298796	109299796	-41387	Vav3	21.94	10.94	0.71	-0.61	21.94	12.15	7.94	11.81	10.94	21.56	26.3	17.95	16.65	12.45	7.36	8.76	6.6	8.46	12.26	8.47	14.69	9.36	12.26	11.21
61965	chr8	86185350	86186350	344848	Phkb	23.26	20.82	-0.21	-0.15	23.26	10.1	6.22	7.55	20.82	34.73	15.03	20.03	8.32	7.26	14.73	4.38	4.4	9.87	3.68	10.59	8.39	18.05	22.69	21.72
19901	chr14	37361508	37362508	-226686	Ghitm	22.16	7.2	1.23	-1.23	22.16	15.68	11.23	8.84	7.2	19.16	15.56	31.76	26.16	10.37	10.52	15.33	9.9	8.46	8.59	9.53	8.39	8.02	7.97	5.61
60633	chr8	36537132	36538132	48441	6430573F11Rik	27.75	8.72	1.31	-1.63	27.75	19.86	15.62	11.81	8.72	32.33	19.86	31.07	26.16	17.63	15.78	12.04	16.49	18.33	12.26	10.59	12.59	8.02	10.42	7.71
16961	chr13	45936454	45937454	28037	Atxn1	6.28	28.94	-2.56	-5.12	6.28	2.49	5.64	0.76	28.94	4.79	6.44	7.6	1.19	2.07	4.21	4.38	5.5	7.05	1.23	1.06	0	28.75	30.04	28.03
8776	chr10	126918798	126919798	-17927	Atp23	14.6	19.53	-0.79	-0.76	14.6	10.26	9.87	7.43	19.53	15.57	12.34	15.88	13.08	13.48	4.21	12.04	7.7	9.87	8.59	7.41	6.29	25.4	22.69	10.51
62406	chr8	104301221	104302221	8424	Cmtm1	21.33	15.87	0.05	-0.03	21.33	4.63	3.13	2.7	15.87	23.95	14.49	25.55	2.38	5.19	6.31	4.38	2.2	2.82	4.91	3.18	0	15.38	19.62	12.61
45964	chr4	89129082	89130082	-1356	Gm12602	15.07	22.83	-0.99	-1.19	15.07	8.08	10.35	8.95	22.83	11.98	11.81	21.41	19.03	3.11	2.1	8.76	11	11.28	3.68	8.47	14.69	24.07	17.78	26.63
33638	chr19	45528963	45529963	31101	Poll	13.03	5.54	0.83	-0.52	13.03	9.68	9.04	9.47	5.54	13.17	10.73	15.19	15.46	7.26	6.31	5.47	13.19	8.46	7.36	8.47	12.59	4.01	4.91	7.71
64257	chr9	41212317	41213317	6662	1700063D05Rik	32.68	26.87	-0.07	-0.05	32.68	18.15	13.42	11.06	26.87	29.94	37.03	31.07	27.35	16.59	10.52	13.14	8.8	18.33	11.04	13.76	8.39	24.74	30.66	25.22
36401	chr2	79511641	79512641	-55505	Neurod1	10.64	22.43	-1.43	-1.99	10.64	4.87	4.85	5.62	22.43	11.98	7.51	12.43	8.32	1.04	5.26	10.95	2.2	1.41	7.36	7.41	2.1	19.39	22.69	25.22
4405	chr1	176289216	176290216	-14404	Pld5	17.51	43.74	-1.69	-4.46	17.51	5.25	4.13	5.15	43.74	19.16	16.1	17.26	9.51	4.15	2.1	6.57	4.4	1.41	4.91	4.24	6.29	34.1	50.89	46.24
5671	chr10	22834232	22835232	-14604	Tcf21	14	6.17	0.78	-0.5	14	3.68	7.57	2.63	6.17	16.77	10.73	14.5	4.76	2.07	4.21	10.95	3.3	8.46	3.68	2.12	2.1	4.68	6.13	7.71
38420	chr2	150650403	150651403	-16591	E130215H24Rik	27.46	17.56	0.31	-0.25	27.46	13.81	14.04	8.77	17.56	23.95	32.2	26.24	22.6	8.3	10.52	17.51	7.7	16.92	7.36	6.35	12.59	19.39	17.17	16.12
51138	chr5	123045561	123046561	955	Morn3	9.78	11.75	-0.62	-0.37	9.78	8.89	11.76	5.26	11.75	10.78	12.34	6.21	13.08	6.22	7.36	5.47	14.29	15.51	0	3.18	12.59	17.38	12.26	5.61
25426	chr16	33891516	33892516	62351	Itgb5	26.17	44.78	-1.14	-2.69	26.17	15.22	11.65	14.38	44.78	26.35	25.22	26.93	15.46	21.78	8.41	6.57	14.29	14.1	7.36	12.71	23.08	44.12	45.37	44.84
66519	chr9	118841578	118842578	-84458	Ctdspl	14.5	10.09	0.16	-0.08	14.5	14.75	11.7	11.27	10.09	14.37	13.95	15.19	20.22	11.41	12.62	12.04	13.19	9.87	8.59	6.35	18.88	10.03	10.42	9.81
55380	chr6	128088390	128089390	54688	Tspan9	29.6	15.42	0.58	-0.56	29.6	19.43	15.41	17.66	15.42	34.73	20.93	33.15	23.79	15.56	18.93	15.33	15.39	15.51	17.17	14.82	20.98	21.39	12.26	12.61
15741	chr12	119861029	119862029	-84433	Tmem196	7.47	16.16	-1.5	-1.49	7.47	1.43	2.19	4.5	16.16	5.99	5.37	11.05	1.19	3.11	0	3.28	3.3	0	6.13	3.18	4.2	10.03	15.33	23.12
1983	chr1	80018327	80019327	-160162	Serpine2	7.86	45.3	-2.94	-8.35	7.86	5.86	6.11	6.67	45.3	4.79	4.29	14.5	7.14	6.22	4.21	3.28	6.6	8.46	7.36	6.35	6.29	48.14	42.92	44.84
42636	chr3	122508841	122509841	25772	Bcar3	17.68	9.7	0.51	-0.33	17.68	12.82	13.9	16.96	9.7	26.35	12.88	13.81	15.46	9.33	13.67	10.95	20.89	9.87	17.17	14.82	18.88	8.69	9.2	11.21
25968	chr16	51942385	51943385	44402	Gm29686	9.67	10.27	-0.38	-0.17	9.67	5.76	5.64	6.14	10.27	2.4	15.56	11.05	4.76	8.3	4.21	5.47	4.4	7.05	3.68	4.24	10.49	13.37	10.42	7.01
46139	chr4	97344007	97345007	-237436	Nfia	46.57	13.22	1.43	-2.32	46.57	8.4	11.49	18.5	13.22	69.46	29.52	40.74	9.51	6.22	9.47	18.61	8.8	7.05	26.98	20.12	8.39	18.72	15.33	5.61
67636	chrX	103288318	103289318	-32204	4930519F16Rik	15.77	10.98	0.11	-0.05	15.77	5.86	5.43	7.19	10.98	15.57	14.49	17.26	7.14	5.19	5.26	7.66	4.4	4.23	11.04	4.24	6.29	8.69	11.65	12.61
413	chr1	21838485	21839485	122957	Kcnq5	33.77	14.89	0.79	-0.96	33.77	12.82	11.91	22.76	14.89	31.14	27.37	42.81	15.46	10.37	12.62	12.04	11	12.69	28.21	21.18	18.88	14.71	11.04	18.92
294	chr1	16392233	16393233	126382	Stau2	22.41	10.69	0.68	-0.5	22.41	12.97	9.61	5.85	10.69	20.36	12.34	34.53	19.03	7.26	12.62	7.66	9.9	11.28	4.91	6.35	6.29	5.35	9.2	17.52
11289	chr11	85169763	85170763	-833	1700125H20Rik	17.65	19.96	-0.54	-0.44	17.65	10.52	10.61	11.71	19.96	17.96	12.88	22.1	19.03	6.22	6.31	8.76	13.19	9.87	9.81	14.82	10.49	10.03	19.01	30.83
64204	chr9	40116591	40117591	10948	Olfr985	11.89	16.83	-0.83	-0.65	11.89	9.96	6.79	8.84	16.83	8.38	20.39	6.91	14.27	11.41	4.21	13.14	4.4	2.82	8.59	9.53	8.39	12.03	15.33	23.12
49471	chr5	58105658	58106658	346840	4930459L07Rik	40.83	9.27	1.77	-3.3	40.83	14.65	15.2	8.89	9.27	46.71	29.52	46.27	17.84	12.45	13.67	14.23	8.8	22.56	9.81	8.47	8.39	6.69	9.2	11.91
54327	chr6	92509590	92510590	24771	Prickle2	14.6	3.83	1.64	-1.19	14.6	4.87	6.05	11.05	3.83	15.57	12.34	15.88	8.32	2.07	4.21	5.47	0	12.69	11.04	7.41	14.69	5.35	6.13	0
29828	chr18	5440791	5441791	-106484	Zfp438	14.15	15.67	-0.46	-0.33	14.15	23.76	15.41	9.01	15.67	16.77	9.12	16.57	27.35	16.59	27.35	13.14	17.59	15.51	4.91	9.53	12.59	11.37	20.23	15.41
16037	chr13	15078865	15079865	-384358	Gli3	19.6	5.23	1.6	-1.55	19.6	12.92	6	1.52	5.23	20.36	12.88	25.55	17.84	8.3	12.62	7.66	3.3	7.05	2.45	2.12	0	5.35	6.13	4.2
54227	chr6	89286429	89287429	-1204	4930512J16Rik	12.01	9.52	-0.05	-0.02	12.01	12.12	8.56	12.63	9.52	19.16	8.59	8.29	15.46	10.37	10.52	12.04	6.6	7.05	7.36	13.76	16.78	8.69	7.97	11.91
40999	chr3	65339905	65340905	9024	A730090N16Rik	39.82	7.11	2.13	-3.8	39.82	14.1	15.52	15.73	7.11	29.94	32.2	57.31	21.41	11.41	9.47	7.66	21.99	16.92	13.49	14.82	18.88	8.02	4.91	8.41
60158	chr8	20423746	20424746	568	2610005L07Rik	14.47	13.25	-0.2	-0.11	14.47	8.45	6.64	7.65	13.25	15.57	16.1	11.74	10.7	5.19	9.47	6.57	7.7	5.64	6.13	4.24	12.59	9.36	17.78	12.61
11754	chr11	98202432	98203432	-373	Cdk12	56.03	83.17	-0.92	-3.23	56.03	25.19	30.87	31.79	83.17	53.89	56.89	57.31	28.54	20.74	26.3	33.93	31.89	26.79	26.98	22.23	46.16	84.24	93.81	71.47
35379	chr2	44334293	44335293	-269469	Arhgap15os	6.56	16.58	-1.68	-1.84	6.56	5.02	4.07	3.23	16.58	4.79	5.9	8.98	3.57	6.22	5.26	4.38	2.2	5.64	1.23	6.35	2.1	11.37	20.85	17.52
59237	chr7	130654586	130655586	-37470	Tacc2	15.24	10.76	0.18	-0.09	15.24	13.3	9.25	10.99	10.76	17.96	13.95	13.81	19.03	11.41	9.47	14.23	12.1	1.41	9.81	8.47	14.69	10.03	15.94	6.31
68259	chrX	162137457	162138457	21484	Nhs	18.67	12.71	0.18	-0.1	18.67	5.02	5.59	9.49	12.71	23.95	13.42	18.64	3.57	6.22	5.26	7.66	7.7	1.41	14.72	11.65	2.1	16.05	7.36	14.71
30753	chr18	40300596	40301596	42735	Kctd16	6.69	14.35	-1.46	-1.4	6.69	1.4	3.5	4.97	14.35	4.79	6.98	8.29	0	1.04	3.16	3.28	4.4	2.82	1.23	3.18	10.49	12.03	13.49	17.52
2583	chr1	106636411	106637411	77379	Bcl2	10.37	16.52	-1.02	-0.95	10.37	8.28	4.6	5.73	16.52	13.17	9.66	8.29	5.95	3.11	15.78	4.38	6.6	2.82	2.45	4.24	10.49	22.06	13.49	14.01
42129	chr3	103146212	103147212	6386	Dennd2c	4.86	13.94	-1.91	-1.81	4.86	8.88	3.97	6.43	13.94	2.4	8.05	4.14	13.08	8.3	5.26	5.47	2.2	4.23	2.45	4.24	12.59	13.37	16.55	11.91
9401	chr11	20602939	20603939	-28538	Sertad2	28.14	12.37	0.84	-0.91	28.14	9.07	6.27	6.56	12.37	32.33	27.91	24.17	8.32	4.15	14.73	7.66	5.5	5.64	4.91	8.47	6.29	11.37	15.94	9.81
37185	chr2	113366157	113367157	38921	Fmn1	9.95	47.23	-2.57	-7.09	9.95	3.18	4.28	5.21	47.23	11.98	12.34	5.52	1.19	5.19	3.16	2.19	2.2	8.46	6.13	5.29	4.2	33.43	66.22	42.04
41472	chr3	84002465	84003465	37196	Tmem131l	11.92	18.14	-0.98	-0.98	11.92	10.32	15.46	9.81	18.14	8.38	12.88	14.5	14.27	9.33	7.36	13.14	12.1	21.15	7.36	5.29	16.78	21.39	19.01	14.01
13603	chr12	40397484	40398484	47806	Zfp277	19.98	4.77	1.75	-1.7	19.98	8.88	8.1	3.61	4.77	16.77	20.39	22.79	13.08	7.26	6.31	7.66	11	5.64	2.45	0	8.39	1.34	7.36	5.61
46784	chr4	117288784	117289784	171	Rnf220	42.39	59.08	-0.82	-1.93	42.39	19.55	15.77	20.59	59.08	43.11	48.84	35.22	27.35	17.63	13.67	21.89	9.9	15.51	19.62	21.18	20.98	52.15	66.22	58.86
39801	chr3	19270744	19271744	-6236	Pde7a	18.79	5.95	1.25	-0.93	18.79	10.18	9.56	4.1	5.95	19.16	12.34	24.86	10.7	10.37	9.47	9.85	13.19	5.64	4.91	5.29	2.1	4.01	1.23	12.61
26289	chr16	65553960	65554960	8237	Chmp2b	21.58	5.66	1.57	-1.62	21.58	14.98	11.91	8.18	5.66	15.57	18.78	30.38	26.16	11.41	7.36	10.95	12.1	12.69	9.81	6.35	8.39	7.35	6.13	3.5
42211	chr3	105452027	105453027	197	Kcnd3	41.85	34.33	-0.08	-0.06	41.85	15.61	16.82	21.08	34.33	50.3	33.81	41.43	23.79	8.3	14.73	18.61	21.99	9.87	14.72	29.65	18.88	31.42	43.53	28.03
52741	chr6	30589516	30590516	-20994	Cpa5	9.31	13.89	-0.99	-0.76	9.31	8.73	9.14	7.25	13.89	8.38	6.44	13.12	9.51	10.37	6.31	7.66	9.9	9.87	4.91	6.35	10.49	15.38	7.36	18.92
24139	chr15	93660688	93661688	-65297	Prickle1	17.36	11.54	0.23	-0.13	17.36	9.38	12.49	14.22	11.54	21.56	13.95	16.57	8.32	12.45	7.36	8.76	13.19	15.51	11.04	16.94	14.69	14.04	7.97	12.61
31193	chr18	56962659	56963659	12220	C330018D20Rik	5.46	18.61	-2.15	-2.67	5.46	3.63	2.4	4.5	18.61	7.19	6.44	2.76	3.57	2.07	5.26	1.09	3.3	2.82	6.13	3.18	4.2	12.03	22.07	21.72
60255	chr8	24595231	24596231	-65	Ido1	20.28	20.05	-0.33	-0.26	20.28	13.4	11.07	12.82	20.05	17.96	16.64	26.24	13.08	16.59	10.52	12.04	9.9	11.28	18.4	13.76	6.29	13.37	25.75	21.02
3750	chr1	157288991	157289991	-122861	2810025M15Rik	18.02	4.74	1.48	-1.3	18.02	2.93	6.16	5.67	4.74	19.16	15.56	19.33	3.57	2.07	3.16	7.66	6.6	4.23	8.59	2.12	6.29	4.68	1.84	7.71
37795	chr2	131430284	131431284	-61078	Smox	38.7	9.17	1.69	-2.93	38.7	26.93	35.26	22.77	9.17	47.9	29.52	38.67	45.19	12.45	23.14	36.12	32.99	36.66	28.21	25.41	14.69	8.69	5.52	13.31
48601	chr5	22511505	22512505	17025	Gm15421	3.49	10.3	-1.97	-1.5	3.49	2.23	4.08	4.26	10.3	4.79	4.29	1.38	3.57	2.07	1.05	2.19	4.4	5.64	1.23	1.06	10.49	9.36	11.04	10.51
7845	chr10	97345047	97346047	-77931	Mir3966	15.99	17.61	-0.51	-0.4	15.99	7.6	10.09	7.36	17.61	14.37	12.88	20.72	7.14	8.3	7.36	5.47	12.1	12.69	7.36	4.24	10.49	14.04	12.88	25.92
62460	chr8	105544477	105545477	21087	Atp6v0d1	15.53	8.73	0.48	-0.27	15.53	10.32	11.34	8.08	8.73	14.37	17.71	14.5	14.27	9.33	7.36	7.66	16.49	9.87	7.36	10.59	6.29	5.35	6.13	14.71
35218	chr2	35544557	35545557	-13401	Dab2ip	12.93	21.08	-1.05	-1.25	12.93	7.42	11.81	13.3	21.08	13.17	11.81	13.81	10.7	1.04	10.52	13.14	11	11.28	6.13	21.18	12.59	25.4	19.62	18.22
26618	chr16	80272337	80273337	273461	1700066C05Rik	15.92	24.66	-0.98	-1.27	15.92	1.14	2.3	2.4	24.66	13.17	16.64	17.95	2.38	0	1.05	4.38	1.1	1.41	6.13	1.06	0	26.07	27.59	20.32
7123	chr10	76668537	76669537	-45407	Col6a2	17	17.73	-0.4	-0.3	17	13.51	9.72	12.8	17.73	19.16	11.81	20.03	15.46	12.45	12.62	5.47	11	12.69	11.04	10.59	16.78	19.39	18.39	15.41
10414	chr11	57389273	57390273	128871	Fam114a2	15.13	10.46	0.18	-0.09	15.13	6.4	5.7	5.74	10.46	16.77	13.42	15.19	3.57	10.37	5.26	6.57	7.7	2.82	2.45	8.47	6.29	6.69	13.49	11.21
68085	chrX	150477655	150478655	-19005	Tmem29	78.46	73.59	-0.27	-0.49	78.46	51.13	46.24	39.24	73.59	87.42	64.4	83.55	84.44	34.23	34.71	38.31	53.88	46.52	42.93	32.82	41.96	64.18	80.93	75.67
13772	chr12	48211030	48212030	-1171353	Foxg1	14.85	9.08	0.3	-0.15	14.85	10.64	8.57	6.67	9.08	15.57	9.66	19.33	13.08	6.22	12.62	5.47	13.19	7.05	7.36	6.35	6.29	14.71	5.52	7.01
67081	chrX	43052867	43053867	221417	Tenm1	1.98	21.67	-4.05	-5.04	1.98	1.44	1.3	0.76	21.67	2.4	2.15	1.38	1.19	2.07	1.05	1.09	0	2.82	1.23	1.06	0	18.05	24.53	22.42
67478	chrX	93309586	93310586	23579	Arx	17.45	10.68	0.3	-0.17	17.45	3.23	4.96	6.55	10.68	14.37	14.49	23.48	2.38	3.11	4.21	7.66	4.4	2.82	12.26	3.18	4.2	9.36	7.97	14.71
37907	chr2	134643447	134644447	174	Tmx4	163.45	179.85	-0.5	-2.49	163.45	109.84	116.84	105.55	179.85	170.06	135.24	185.06	176.01	77.79	75.73	117.13	112.16	121.24	109.16	92.11	115.39	177.83	180.26	181.47
30319	chr18	24925984	24926984	217861	Fhod3	34.01	6.58	1.99	-3.23	34.01	6	10.45	10.06	6.58	33.53	23.61	44.88	10.7	4.15	3.16	9.85	8.8	12.69	12.26	9.53	8.39	6.69	6.74	6.31
58255	chr7	97960804	97961804	41346	Gdpd4	14.08	7.68	0.54	-0.3	14.08	4.82	5.23	9.88	7.68	7.19	19.86	15.19	7.14	4.15	3.16	5.47	8.8	1.41	8.59	6.35	14.69	5.35	8.58	9.11
6513	chr10	57784272	57785272	-151	Fabp7	18.92	17.56	-0.25	-0.16	18.92	10.83	10.35	8.94	17.56	27.54	16.1	13.12	9.51	11.41	11.57	6.57	13.19	11.28	3.68	6.35	16.78	12.03	19.62	21.02
2116	chr1	85736173	85737173	-67	A630001G21Rik	22.49	16.16	0.13	-0.07	22.49	8.82	10.76	11.11	16.16	26.35	20.39	20.72	11.89	11.41	3.16	9.85	15.39	7.05	12.26	10.59	10.49	10.03	15.33	23.12
24471	chr15	102524818	102525818	-697	Npff	12.76	12.54	-0.33	-0.18	12.76	13.96	9.77	10.29	12.54	11.98	11.81	14.5	17.84	10.37	13.67	7.66	13.19	8.46	9.81	8.47	12.59	19.39	9.81	8.41
41064	chr3	67070825	67071825	85358	Rsrc1	14.74	6.05	0.84	-0.55	14.74	2.09	1.2	1.58	6.05	14.37	9.12	20.72	0	2.07	4.21	1.09	1.1	1.41	3.68	1.06	0	4.68	8.58	4.9
23632	chr15	76973563	76974563	25802	1110038F14Rik	18.44	23.33	-0.67	-0.65	18.44	9.04	9.3	13.81	23.33	11.98	24.69	18.64	8.32	9.33	9.47	10.95	9.9	7.05	9.81	16.94	14.69	20.06	18.39	31.53
60094	chr8	17115355	17116355	419530	Csmd1	13.29	8.97	0.19	-0.09	13.29	7.41	9.51	5.14	8.97	13.17	8.05	18.64	10.7	3.11	8.41	10.95	7.7	9.87	4.91	2.12	8.39	8.69	9.81	8.41
37816	chr2	132006186	132007186	23302	Rassf2	35.85	53.68	-0.95	-2.25	35.85	15.39	18.39	31.47	53.68	39.52	25.22	42.81	19.03	15.56	11.57	14.23	19.79	21.15	26.98	31.76	35.67	55.49	45.99	59.56
43152	chr3	138053634	138054634	13254	Gm5105	42.51	15.99	1.06	-1.56	42.51	24.42	20	18.25	15.99	51.5	21.47	54.55	35.68	19.71	17.88	26.27	15.39	18.33	14.72	16.94	23.08	15.38	17.17	15.41
27438	chr17	12916254	12917254	425	Tcp1	82.51	72.06	-0.16	-0.24	82.51	56.86	50.99	57.12	72.06	92.21	77.28	78.03	79.68	43.56	47.33	47.07	59.38	46.52	42.93	50.82	77.62	72.2	76.03	67.96
59850	chr8	9285561	9286561	141392	4930453L07Rik	21.22	4.94	1.7	-1.67	21.22	13.95	8.93	3.28	4.94	25.15	15.03	23.48	17.84	13.48	10.52	9.85	9.9	7.05	2.45	3.18	4.2	6.69	6.74	1.4
63553	chr9	15305859	15306859	89	4931406C07Rik	66.15	64.89	-0.32	-0.57	66.15	42.51	37.03	37.23	64.89	70.66	60.11	67.67	61.84	41.49	24.19	28.46	31.89	50.75	38.02	25.41	48.25	58.83	64.38	71.47
39383	chr2	178642670	178643670	212655	Cdh26	6.18	10.52	-1.11	-0.77	6.18	2.88	7	6.6	10.52	9.58	4.83	4.14	2.38	4.15	2.1	8.76	6.6	5.64	6.13	5.29	8.39	8.69	11.65	11.21
36679	chr2	92400802	92401802	-39	Mapk8ip1	16.48	20.19	-0.63	-0.52	16.48	10.53	8.87	13.8	20.19	7.19	23.61	18.64	10.7	10.37	10.52	12.04	3.3	11.28	17.17	9.53	14.69	24.74	19.01	16.82
46230	chr4	98975433	98976433	52123	Usp1	10.97	3.09	1.51	-0.93	10.97	8.1	4.96	2.52	3.09	9.58	10.2	13.12	10.7	5.19	8.41	5.47	6.6	2.82	1.23	2.12	4.2	4.01	2.45	2.8
17742	chr13	74617062	74618062	-22291	Erap1	89.68	79.85	-0.19	-0.32	89.68	65.64	67.17	59.16	79.85	81.44	82.65	104.96	107.03	41.49	48.39	65.68	58.28	77.54	84.63	57.17	35.67	74.88	83.39	81.28
48931	chr5	35641742	35642742	37538	Htra3	19.63	16.06	-0.04	-0.02	19.63	4.02	7.99	8.84	16.06	28.74	17.71	12.43	4.76	5.19	2.1	10.95	8.8	4.23	8.59	11.65	6.29	7.35	23.3	17.52
55959	chr6	147091115	147092115	540	Klhl42	65.22	68.46	-0.42	-0.85	65.22	33.6	34.69	37.35	68.46	58.68	66.55	70.43	54.71	14.52	31.56	35.03	35.19	33.84	40.47	25.41	46.16	64.18	66.22	74.97
44645	chr4	40051569	40052569	-91196	Aco1	34.57	9.98	1.45	-2.15	34.57	29.13	25.23	8.32	9.98	45.51	30.59	27.62	40.44	26.97	19.99	28.46	27.49	19.74	12.26	10.59	2.1	7.35	8.58	14.01
11615	chr11	95096334	95097334	-20023	Itga3	6.98	21.85	-1.98	-2.84	6.98	6.4	8.83	13.04	21.85	5.99	8.05	6.91	11.89	4.15	3.16	9.85	11	5.64	8.59	11.65	18.88	16.05	21.46	28.03
62526	chr8	107065806	107066806	-662	Tmed6	6.17	17.43	-1.8	-2.11	6.17	7.2	7.36	7.61	17.43	4.79	7.51	6.21	5.95	8.3	7.36	10.95	5.5	5.64	4.91	9.53	8.39	18.05	20.23	14.01
52632	chr6	26897437	26898437	966511	Gm20756	16.56	19.28	-0.58	-0.45	16.56	5.51	6.84	4.81	19.28	20.36	8.59	20.72	7.14	5.19	4.21	8.76	3.3	8.46	4.91	7.41	2.1	8.02	23.91	25.92
34748	chr2	21958064	21959064	-268939	Myo3a	20.85	23.45	-0.55	-0.55	20.85	12.4	8.66	10.54	23.45	20.36	16.64	25.55	14.27	14.52	8.41	14.23	3.3	8.46	7.36	13.76	10.49	28.75	17.78	23.82
49499	chr5	61155641	61156641	-652702	G6pd2	14.67	32.67	-1.5	-2.82	14.67	6.85	4.13	5.85	32.67	15.57	13.95	14.5	5.95	9.33	5.26	5.47	5.5	1.41	4.91	4.24	8.39	22.06	42.31	33.63
51834	chr5	144948197	144949197	17133	Smurf1	12.59	16.48	-0.75	-0.65	12.59	10	14.89	10.95	16.48	10.78	11.81	15.19	5.95	10.37	13.67	12.04	14.29	18.33	8.59	13.76	10.49	12.03	22.69	14.71
12692	chr11	121475364	121476364	23915	Tbcd	8.39	10.29	-0.69	-0.41	8.39	13.3	5.17	9.59	10.29	5.99	5.37	13.81	19.03	11.41	9.47	3.28	6.6	5.64	9.81	8.47	10.49	10.03	11.04	9.81
13833	chr12	52097336	52098336	90	Nubpl	48.37	38.71	-0.04	-0.03	48.37	23.15	25.96	22.15	38.71	52.69	41.32	51.1	29.73	18.67	21.04	25.18	23.09	29.61	23.3	15.88	27.27	36.77	42.92	36.43
63084	chr8	123348777	123349777	16564	Spire2	11.79	7.87	0.19	-0.09	11.79	8.75	12.58	11.69	7.87	11.98	12.34	11.05	9.51	7.26	9.47	19.7	11	7.05	17.17	7.41	10.49	8.02	8.58	7.01
25649	chr16	41523965	41524965	-8361	Lsamp	12.37	9.69	0	0	12.37	5.22	3.81	3.68	9.69	7.19	16.1	13.81	8.32	2.07	5.26	3.28	1.1	7.05	3.68	1.06	6.29	14.71	7.36	7.01
61203	chr8	59831541	59832541	6392	4930470O06Rik	4.6	15.3	-2.08	-2	4.6	6.7	3.4	2.52	15.3	0	4.83	8.98	10.7	5.19	4.21	2.19	6.6	1.41	1.23	2.12	4.2	12.7	17.78	15.41
67367	chrX	74879398	74880398	42702	Gm5936	11.14	17.31	-1.03	-1.05	11.14	8.15	4.23	3.46	17.31	13.17	11.27	8.98	11.89	5.19	7.36	3.28	6.6	2.82	6.13	4.24	0	12.7	19.62	19.62
19897	chr14	37238230	37239230	-103408	Ghitm	15.96	13.57	-0.12	-0.06	15.96	9.24	9.66	11.4	13.57	11.98	9.66	26.24	13.08	6.22	8.41	13.14	8.8	7.05	11.04	8.47	14.69	11.37	10.42	18.92
58415	chr7	101393828	101394828	-60	Arap1	31.61	65.67	-1.4	-4.64	31.61	29.83	17.93	16.71	65.67	23.95	32.2	38.67	39.25	17.63	32.61	14.23	29.69	9.87	12.26	10.59	27.27	54.15	84	58.86
18577	chr13	105847763	105848763	404570	Htr1a	11.71	16.04	-0.82	-0.73	11.71	4.03	6.37	4.04	16.04	11.98	10.73	12.43	4.76	3.11	4.21	9.85	2.2	7.05	3.68	4.24	4.2	19.39	14.72	14.01
20096	chr14	48589382	48590382	72852	Otx2	13.58	10.5	-0.02	-0.01	13.58	6.99	3.87	3.34	10.5	8.38	17.17	15.19	9.51	7.26	4.21	4.38	4.4	2.82	3.68	4.24	2.1	10.03	11.65	9.81
57497	chr7	69949939	69950939	387383	Gm29683	18.4	11.64	0.32	-0.21	18.4	5.61	4.81	12.18	11.64	16.77	17.71	20.72	9.51	2.07	5.26	4.38	4.4	5.64	12.26	15.88	8.39	11.37	11.65	11.91
41750	chr3	90536963	90537963	209	S100a16	30.95	26.95	-0.16	-0.12	30.95	14.46	11.39	17.26	26.95	44.31	20.93	27.62	13.08	15.56	14.73	8.76	9.9	15.51	15.94	19.06	16.78	18.05	36.18	26.63
62114	chr8	91908646	91909646	-107492	Irx3	20.08	4.48	1.89	-1.85	20.08	4.38	9.24	5.9	4.48	22.75	20.93	16.57	4.76	2.07	6.31	9.85	6.6	11.28	6.13	5.29	6.29	1.34	3.68	8.41
65031	chr9	66732988	66733988	19802	Car12	42.35	17	0.98	-1.52	42.35	11.76	9.4	11.82	17	35.93	38.64	52.48	15.46	11.41	8.41	10.95	8.8	8.46	12.26	12.71	10.49	21.39	13.49	16.12
45350	chr4	64029295	64030295	17220	Tnc	27.06	25.69	-0.28	-0.24	27.06	12.55	15.72	13.74	25.69	35.93	15.56	29.69	17.84	11.41	8.41	14.23	13.19	19.74	15.94	10.59	14.69	22.06	26.98	28.03
1155	chr1	53296547	53297547	-19	Pms1	151.53	120.47	-0.03	-0.05	151.53	106.51	97.84	93.01	120.47	153.29	119.68	181.61	143.9	76.75	98.87	97.42	104.46	91.64	95.66	91.06	92.31	119.67	132.44	109.3
62848	chr8	117314238	117315238	-34432	Cmip	38.97	18.44	0.72	-0.93	38.97	15.09	16.87	17.42	18.44	37.13	30.05	49.72	20.22	14.52	10.52	18.61	16.49	15.51	19.62	11.65	20.98	22.73	17.17	15.41
45730	chr4	82467976	82468976	37303	Nfib	14.85	6.1	0.94	-0.6	14.85	8.43	6.16	5.5	6.1	15.57	9.66	19.33	10.7	9.33	5.26	7.66	6.6	4.23	4.91	5.29	6.29	5.35	2.45	10.51
24706	chr16	10313220	10314220	248	Emp2	39.7	30.74	0.01	-0.01	39.7	18.58	18.28	17.6	30.74	34.73	38.1	46.27	20.22	17.63	17.88	16.42	18.69	19.74	15.94	15.88	20.98	29.42	31.27	31.53
67991	chrX	142106617	142107617	89819	Gucy2f	35.63	9.75	1.46	-2.32	35.63	6.36	5.7	7.9	9.75	35.93	29.52	41.43	10.7	3.11	5.26	6.57	7.7	2.82	11.04	8.47	4.2	12.7	6.74	9.81
47834	chr4	149292693	149293693	14505	Kif1b	12.95	7.78	0.39	-0.2	12.95	7.57	6.74	8.02	7.78	16.77	9.66	12.43	5.95	5.19	11.57	6.57	6.6	7.05	6.13	9.53	8.39	10.03	4.91	8.41
20890	chr14	75487667	75488667	32185	Siah3	37.24	13.51	1.08	-1.58	37.24	16.07	25.61	10.48	13.51	32.33	33.81	45.57	27.35	12.45	8.41	16.42	30.79	29.61	13.49	13.76	4.2	16.71	9.81	14.01
22281	chr15	13067290	13068290	105885	Cdh6	32.61	42.84	-0.75	-1.14	32.61	11.56	12.8	16.54	42.84	20.36	33.27	44.19	10.7	14.52	9.47	10.95	7.7	19.74	15.94	12.71	20.98	41.45	57.64	29.43
56342	chr7	19761960	19762960	8072	Bcam	17.22	6.31	1.07	-0.82	17.22	13.26	8.78	9.94	6.31	26.35	12.88	12.43	17.84	9.33	12.62	6.57	9.9	9.87	9.81	7.41	12.59	5.35	7.97	5.61
48562	chr5	21424525	21425525	122	Fam185a	148.59	117.04	-0.02	-0.03	148.59	77.14	84.12	89.35	117.04	165.27	122.36	158.13	115.36	49.78	66.27	79.91	103.36	69.08	100.57	73.06	94.41	111.65	128.76	110.71
53865	chr6	73519600	73520600	-49079	1700065L07Rik	9.76	14.81	-0.96	-0.83	9.76	9.54	7.63	5.45	14.81	10.78	10.2	8.29	11.89	7.26	9.47	5.47	13.19	4.23	3.68	8.47	4.2	16.05	12.26	16.12
31806	chr18	75385783	75386783	18918	Smad7	57.69	67.9	-0.59	-1.42	57.69	34.55	34.75	26.6	67.9	63.47	53.67	55.93	53.52	25.93	24.19	30.65	43.98	29.61	20.85	21.18	37.76	58.83	69.9	74.97
64597	chr9	52282207	52283207	-114596	Zc3h12c	14.85	4.13	1.45	-1.11	14.85	7.55	7.1	6.27	4.13	9.58	17.71	17.26	5.95	8.3	8.41	9.85	4.4	7.05	6.13	8.47	4.2	4.68	4.91	2.8
56916	chr7	45015717	45016717	32	Scaf1	63.22	82.24	-0.74	-2.09	63.22	45.35	43.57	46.8	82.24	56.29	67.08	66.29	53.52	40.45	42.07	45.98	49.48	35.25	40.47	30.7	69.23	84.24	98.72	63.76
56140	chr7	6764969	6765969	34886	Usp29	18.16	5.74	1.34	-1.1	18.16	9.05	8.36	9.65	5.74	11.98	15.56	26.93	8.32	8.3	10.52	8.76	12.1	4.23	11.04	9.53	8.39	4.01	10.42	2.8
60687	chr8	39031263	39032263	25918	Tusc3	27.64	12.33	0.8	-0.78	27.64	9.23	9.35	5.55	12.33	27.54	18.78	36.6	13.08	8.3	6.31	7.66	7.7	12.69	6.13	4.24	6.29	8.69	7.97	20.32
30907	chr18	46703924	46704924	24078	Cdo1	12.05	7.62	0.33	-0.15	12.05	9.04	9.87	6.55	7.62	11.98	9.66	14.5	8.32	9.33	9.47	10.95	8.8	9.87	4.91	4.24	10.49	11.37	3.07	8.41
6502	chr10	57183288	57184288	302565	4930467K11Rik	13.38	10.45	-0.03	-0.01	13.38	6.65	4.8	2.58	10.45	11.98	15.03	13.12	9.51	5.19	5.26	5.47	3.3	5.64	2.45	3.18	2.1	14.71	11.04	5.61
18185	chr13	94684871	94685871	-103572	Tbca	18.62	2.36	2.63	-2.47	18.62	7.8	8.05	9	2.36	20.36	18.25	17.26	11.89	5.19	6.31	4.38	9.9	9.87	12.26	6.35	8.39	2.01	3.68	1.4
60031	chr8	14691538	14692538	-196498	Cln8	16.04	7.24	0.81	-0.56	16.04	10.14	9.92	7.43	7.24	11.98	11.27	24.86	9.51	9.33	11.57	7.66	6.6	15.51	8.59	7.41	6.29	7.35	7.36	7.01
37855	chr2	132846304	132847304	138	Crls1	70.8	72.97	-0.4	-0.86	70.8	34.84	31.44	26.3	72.97	73.05	65.47	73.89	42.81	23.85	37.87	33.93	30.79	29.61	29.44	15.88	33.57	72.2	81.55	65.16
51910	chr5	147644929	147645929	80559	Flt1	10.08	26.56	-1.78	-2.96	10.08	7.94	6.64	7.6	26.56	8.38	8.05	13.81	7.14	9.33	7.36	4.38	9.9	5.64	4.91	5.29	12.59	18.72	29.43	31.53
30797	chr18	43052098	43053098	6873	Ppp2r2b	27.33	5.37	2.08	-2.54	27.33	5.94	8.94	6.92	5.37	21.56	20.39	40.05	9.51	6.22	2.1	8.76	11	7.05	4.91	11.65	4.2	7.35	7.36	1.4
13069	chr12	17025718	17026718	-14491	2410004P03Rik	11.57	8.78	0.03	-0.01	11.57	6.89	4.6	7.14	8.78	7.19	12.34	15.19	7.14	10.37	3.16	6.57	4.4	2.82	9.81	7.41	4.2	8.02	9.2	9.11
43551	chr3	150501193	150502193	522169	Mir3963	10.91	8.32	0.04	-0.02	10.91	5.46	6.27	4.45	8.32	7.19	9.66	15.88	5.95	6.22	4.21	6.57	6.6	5.64	4.91	6.35	2.1	5.35	9.81	9.81
19544	chr14	24778822	24779822	288569	Rps24	83.19	38.11	0.78	-1.94	83.19	55.13	45.82	42.44	38.11	87.42	84.8	77.34	89.2	41.49	34.71	37.22	49.48	50.75	51.51	29.65	46.16	30.08	42.92	41.34
36235	chr2	74691309	74692309	-82	Hoxd10	52.49	49.05	-0.26	-0.32	52.49	23.68	19.38	19.93	49.05	64.67	52.06	40.74	26.16	24.89	19.99	17.51	20.89	19.74	13.49	16.94	29.37	50.81	51.5	44.84
30735	chr18	39558062	39559062	-71317	Nr3c1	25.56	8.2	1.23	-1.36	25.56	9.77	11.76	7.78	8.2	26.35	17.17	33.15	17.84	7.26	4.21	5.47	14.29	15.51	8.59	8.47	6.29	7.35	6.74	10.51
49726	chr5	70389641	70390641	452476	Gabrg1	15.52	12.19	0.03	-0.01	15.52	4.08	5.07	2.58	12.19	9.58	15.56	21.41	5.95	2.07	4.21	3.28	7.7	4.23	2.45	5.29	0	13.37	14.1	9.11
67706	chrX	107457140	107458140	-54280	Itm2a	35.79	30.07	-0.06	-0.04	35.79	0.75	2.92	1.82	30.07	25.15	45.62	36.6	1.19	0	1.05	6.57	2.2	0	1.23	2.12	2.1	22.06	47.83	20.32
48156	chr5	3151855	3152855	-191538	Cdk6	38.37	20.23	0.54	-0.62	38.37	16.41	16.51	11.17	20.23	38.32	28.44	48.34	17.84	11.41	19.99	13.14	20.89	15.51	13.49	9.53	10.49	18.72	25.14	16.82
54194	chr6	88123398	88124398	-19640	Mir6376	22.06	19.87	-0.21	-0.14	22.06	19.75	17.6	21.35	19.87	25.15	18.25	22.79	23.79	21.78	13.67	22.99	14.29	15.51	13.49	23.29	27.27	26.07	15.33	18.22
47223	chr4	131334864	131335864	-324890	A930031H19Rik	14.64	5.38	1.11	-0.78	14.64	7.3	7.15	10.07	5.38	13.17	15.56	15.19	8.32	6.22	7.36	5.47	3.3	12.69	4.91	12.71	12.59	6.69	7.36	2.1
39185	chr2	171095464	171096464	364157	Dok5	16.16	8.92	0.55	-0.37	16.16	7.75	5.33	4.04	8.92	17.96	13.95	16.57	10.7	4.15	8.41	8.76	4.4	2.82	3.68	6.35	2.1	10.03	10.42	6.31
872	chr1	41063115	41064115	117637	4930448I06Rik	12.16	10.41	-0.12	-0.05	12.16	7.25	6.11	1.76	10.41	13.17	10.2	13.12	7.14	8.3	6.31	3.28	6.6	8.46	0	5.29	0	13.37	2.45	15.41
15014	chr12	95744080	95745080	52354	Flrt2	39.01	12.35	1.28	-2.03	39.01	20.89	24.4	23.3	12.35	40.72	25.22	51.1	34.49	15.56	12.62	18.61	26.39	28.2	31.89	25.41	12.59	12.7	11.04	13.31
54037	chr6	83188170	83189170	2724	Dctn1	24.1	4.22	2.21	-2.66	24.1	11.37	13.9	13.24	4.22	26.35	20.39	25.55	14.27	9.33	10.52	7.66	14.29	19.74	12.26	19.06	8.39	6.02	2.45	4.2
89	chr1	8915380	8916380	383997	Sntg1	40.67	8.68	1.84	-3.28	40.67	8.7	14.21	8.26	8.68	44.31	25.22	52.48	8.32	8.3	9.47	10.95	17.59	14.1	11.04	11.65	2.1	8.69	11.04	6.31
25021	chr16	21333080	21334080	-224	Magef1	50.84	41.07	-0.06	-0.06	50.84	23.13	18.8	18.89	41.07	57.48	37.03	58	29.73	20.74	18.93	21.89	17.59	16.92	20.85	16.94	18.88	42.79	40.47	39.94
43589	chr3	152170116	152171116	-4716	Gipc2	4.44	20.46	-2.5	-3.45	4.44	5.17	3.6	6.66	20.46	4.79	1.61	6.91	7.14	3.11	5.26	4.38	2.2	4.23	7.36	4.24	8.39	14.71	21.46	25.22
11730	chr11	97659886	97660886	-3026	Mllt6	29.36	34.31	-0.57	-0.72	29.36	12.51	14.64	10.82	34.31	29.94	33.27	24.86	16.65	11.41	9.47	10.95	23.09	9.87	13.49	8.47	10.49	25.4	45.99	31.53
46666	chr4	114405507	114406507	-717	Trabd2b	44.45	57.65	-0.74	-1.67	44.45	27.04	24.97	31.17	57.65	38.32	41.86	53.17	40.44	23.85	16.83	29.56	24.19	21.15	20.85	28.59	44.06	57.5	50.28	65.16
47810	chr4	148841993	148842993	38101	Casz1	26.07	5.38	1.83	-2.29	26.07	6.85	9.3	14.86	5.38	32.33	18.25	27.62	5.95	8.3	6.31	13.14	7.7	7.05	17.17	12.71	14.69	4.68	7.97	3.5
66363	chr9	113741036	113742036	63	Clasp2	75.6	81.63	-0.47	-1.15	75.6	35.42	29.62	24.04	81.63	71.86	71.38	83.55	48.76	24.89	32.61	36.12	32.99	19.74	18.4	24.35	29.37	74.88	95.04	74.97
65818	chr9	95441914	95442914	-35144	Chst2	21.52	11.91	0.46	-0.34	21.52	11	9.82	5.21	11.91	26.35	16.1	22.1	14.27	13.48	5.26	6.57	8.8	14.1	6.13	7.41	2.1	14.71	9.81	11.21
65604	chr9	86898679	86899679	-18471	Snap91	25.75	9.49	1.06	-1.16	25.75	7.89	5.75	9.95	9.49	31.14	24.69	21.41	5.95	10.37	7.36	4.38	4.4	8.46	9.81	11.65	8.39	8.69	8.58	11.21
13319	chr12	30884057	30885057	233	Alkal2	32.2	27.47	-0.13	-0.1	32.2	15.83	12.23	20.06	27.47	38.32	27.91	30.38	21.41	15.56	10.52	8.76	11	16.92	23.3	18	18.88	24.07	28.2	30.13
32471	chr19	8966433	8967433	-108	Eef1g	87.45	114.78	-0.75	-3.06	87.45	55.78	49.57	63.79	114.78	106.59	70.84	84.93	78.49	39.41	49.44	48.16	48.38	52.16	66.23	32.82	92.31	108.3	123.24	112.81
8661	chr10	123316739	123317739	53163	Fam19a2	13.08	6.02	0.67	-0.39	13.08	8.83	10.14	5.49	6.02	13.17	10.2	15.88	11.89	8.3	6.31	6.57	15.39	8.46	4.91	3.18	8.39	6.69	8.58	2.8
3960	chr1	163273776	163274776	39374	Prrx1	23.93	8.49	1.12	-1.15	23.93	7.11	9.09	2.7	8.49	27.54	21.47	22.79	3.57	8.3	9.47	3.28	9.9	14.1	4.91	3.18	0	4.01	11.65	9.81
33801	chr19	49106790	49107790	901265	Sorcs3	16.88	2.82	2.14	-1.9	16.88	8.89	6.85	5.79	2.82	21.56	11.81	17.26	13.08	6.22	7.36	3.28	8.8	8.46	3.68	5.29	8.39	2.67	3.68	2.1
52382	chr6	15411051	15412051	226045	Foxp2	32.1	9.15	1.44	-2.12	32.1	9.27	8.35	6.55	9.15	28.74	31.66	35.91	14.27	9.33	4.21	16.42	4.4	4.23	4.91	6.35	8.39	6.69	11.65	9.11
34352	chr2	7825785	7826785	-430087	Celf2	33.82	8.52	1.66	-2.61	33.82	11.76	12.07	4.1	8.52	31.14	26.83	43.5	15.46	12.45	7.36	8.76	7.7	19.74	4.91	3.18	4.2	9.36	9.2	7.01
46218	chr4	98759960	98760960	-33308	Kank4os	27.91	9.79	1.12	-1.28	27.91	7.97	11.02	20.13	9.79	20.36	24.69	38.67	7.14	5.19	11.57	13.14	14.29	5.64	17.17	22.23	20.98	10.7	11.65	7.01
46424	chr4	104893684	104894684	-17786	C8a	7.96	12.92	-1.06	-0.85	7.96	7.05	3.65	3.57	12.92	4.79	8.05	11.05	10.7	5.19	5.26	9.85	1.1	0	1.23	5.29	4.2	10.03	14.72	14.01
22568	chr15	31601701	31602701	85	Fam173b	77.74	71.74	-0.26	-0.43	77.74	47.98	43.2	39.11	71.74	87.42	57.42	88.39	58.27	40.45	45.23	37.22	47.28	45.11	33.11	33.88	50.35	72.2	82.77	60.26
67238	chrX	59585355	59586355	-283	Fgf13	37.64	6.76	2.07	-3.68	37.64	9.57	8.57	5.45	6.76	39.52	25.76	47.65	13.08	9.33	6.31	6.57	12.1	7.05	3.68	8.47	4.2	4.68	8.58	7.01
67207	chrX	56467480	56468480	13141	Ints6l	20.28	6.43	1.31	-1.24	20.28	11.19	14.47	12.28	6.43	17.96	16.64	26.24	17.84	4.15	11.57	15.33	15.39	12.69	22.08	8.47	6.29	8.69	4.29	6.31
64216	chr9	40392039	40393039	-16122	Gramd1b	51.62	27	0.59	-0.88	51.62	45.16	34.95	34.33	27	62.27	45.62	46.96	65.41	28	42.07	32.84	39.58	32.43	35.57	29.65	37.76	33.43	25.14	22.42
63792	chr9	24502576	24503576	64	Dpy19l1	128.32	124.76	-0.32	-0.9	128.32	32.38	32.01	36.66	124.76	138.92	114.85	131.2	51.14	19.71	26.3	37.22	26.39	32.43	33.11	32.82	44.06	106.97	139.8	127.52
16623	chr13	34278528	34279528	66154	Slc22a23	16.45	9.15	0.53	-0.35	16.45	11.03	6.95	6.85	9.15	16.77	13.95	18.64	14.27	7.26	11.57	4.38	6.6	9.87	3.68	8.47	8.39	10.03	10.42	7.01
34841	chr2	25581254	25582254	-1655	Gm996	17.65	25.3	-0.89	-1.16	17.65	16.34	16.34	11.76	25.3	17.96	12.88	22.1	16.65	17.63	14.73	19.7	11	18.33	11.04	11.65	12.59	28.08	23.3	24.52
10593	chr11	62613534	62614534	9504	Snord65	36.05	39.04	-0.48	-0.68	36.05	19.94	12.28	20.58	39.04	43.11	23.61	41.43	27.35	10.37	22.09	12.04	12.1	12.69	12.26	20.12	29.37	36.1	41.08	39.94
27410	chr17	12290465	12291465	27695	Map3k4	19.81	13.44	0.19	-0.11	19.81	13.65	14.1	6.91	13.44	16.77	19.86	22.79	19.03	11.41	10.52	15.33	14.29	12.69	4.91	9.53	6.29	10.03	8.58	21.72
58165	chr7	95484392	95485392	-686352	Tenm4	4.59	12.7	-1.79	-1.56	4.59	5.51	3.97	4.98	12.7	4.79	4.83	4.14	7.14	6.22	3.16	4.38	3.3	4.23	1.23	7.41	6.29	12.7	18.39	7.01
62045	chr8	89316385	89317385	-272723	Sall1	14.22	7.89	0.45	-0.25	14.22	4.73	5.54	4.86	7.89	14.37	14.49	13.81	4.76	3.11	6.31	4.38	6.6	5.64	6.13	4.24	4.2	10.7	7.36	5.61
35469	chr2	48634099	48635099	-179510	Acvr2a	34.86	10.92	1.3	-1.81	34.86	25	22.09	17.72	10.92	23.95	29.52	51.1	40.44	10.37	24.19	26.27	23.09	16.92	18.4	15.88	18.88	12.7	11.65	8.41
29745	chr17	94424507	94425507	325012	Mettl4	29.77	11.12	1.05	-1.15	29.77	4.37	6.01	5.21	11.12	26.35	18.78	44.19	4.76	5.19	3.16	5.47	5.5	7.05	6.13	5.29	4.2	7.35	9.2	16.82
49825	chr5	73881609	73882609	186302	Usp46	11.98	14.64	-0.67	-0.5	11.98	5.96	6.58	6.91	14.64	13.17	14.49	8.29	9.51	4.15	4.21	6.57	3.3	9.87	4.91	9.53	6.29	10.03	17.78	16.12
66008	chr9	102667924	102668924	42128	Anapc13	23.24	5.57	1.74	-1.89	23.24	7.83	8.05	5.37	5.57	25.15	20.39	24.17	4.76	13.48	5.26	4.38	9.9	9.87	2.45	1.06	12.59	9.36	2.45	4.9
53452	chr6	55016667	55017667	-20834	Gars	18.32	22.24	-0.67	-0.68	18.32	16.16	13.94	13.34	22.24	26.35	13.42	15.19	21.41	18.67	8.41	16.42	9.9	15.51	14.72	12.71	12.59	22.06	25.75	18.92
9286	chr11	17460120	17461120	202932	C1d	26.79	38.31	-0.87	-1.58	26.79	9.25	10.35	8.41	38.31	28.74	19.86	31.76	13.08	3.11	11.57	8.76	11	11.28	7.36	5.29	12.59	38.11	41.08	35.73
2673	chr1	117171814	117172814	1138414	Tsn	16.94	26.6	-1.01	-1.42	16.94	4.88	3.03	2.46	26.6	16.77	16.1	17.95	8.32	0	6.31	3.28	4.4	1.41	0	3.18	4.2	28.75	30.04	21.02
55213	chr6	124427582	124428582	-12227	Pex5	31.44	14.24	0.78	-0.86	31.44	12.79	16.45	20.66	14.24	28.74	19.32	46.27	15.46	15.56	7.36	19.7	9.9	19.74	35.57	20.12	6.29	13.37	15.33	14.01
15790	chr13	4415972	4416972	-17871	Akr1c6	8.27	13.99	-1.1	-0.93	8.27	3.32	5.17	2.92	13.99	4.79	9.66	10.36	4.76	5.19	0	7.66	2.2	5.64	2.45	2.12	4.2	18.05	14.1	9.81
47029	chr4	125843111	125844111	78699	2610028E06Rik	17.77	3.03	2.23	-2.09	17.77	4.81	10.61	14.02	3.03	15.57	17.71	20.03	7.14	5.19	2.1	6.57	15.39	9.87	14.72	8.47	18.88	4.01	3.68	1.4
46186	chr4	98062983	98063983	285857	Nfia	15.38	40.8	-1.81	-4.49	15.38	3.58	6.54	4.1	40.8	20.36	11.27	14.5	2.38	4.15	4.21	3.28	12.1	4.23	4.91	3.18	4.2	32.09	49.66	40.64
58718	chr7	114071670	114072670	45611	Rras2	59.82	26.03	0.83	-1.53	59.82	37.22	30.61	18.84	26.03	44.31	53.67	81.48	59.46	26.97	25.24	32.84	30.79	28.2	19.62	20.12	16.78	24.74	23.91	29.43
29066	chr17	70817855	70818855	28422	Tgif1	27.54	19.21	0.16	-0.11	27.54	8.84	11.7	8.73	19.21	29.94	25.76	26.93	11.89	7.26	7.36	12.04	13.19	9.87	6.13	13.76	6.29	20.06	16.55	21.02
54895	chr6	113531138	113532138	0	Emc3	21.47	20.47	-0.27	-0.2	21.47	12.12	9.3	12.67	20.47	19.16	25.22	20.03	15.46	10.37	10.52	12.04	8.8	7.05	8.59	6.35	23.08	14.71	26.37	20.32
2893	chr1	126737484	126738484	92648	Nckap5	49.15	48.82	-0.35	-0.52	49.15	20.69	21.42	16.61	48.82	47.9	42.93	56.62	29.73	18.67	13.67	24.08	27.49	12.69	17.17	15.88	16.78	48.8	57.02	40.64
64351	chr9	44053863	44054863	10979	Thy1	8.59	3.71	0.93	-0.4	8.59	7.24	5.07	5.14	3.71	9.58	8.59	7.6	7.14	9.33	5.26	5.47	5.5	4.23	4.91	2.12	8.39	2.01	0	9.11
41837	chr3	94886468	94887468	-10	Psmb4	27.99	23.8	-0.12	-0.08	27.99	21.73	15.04	19.31	23.8	19.16	31.66	33.15	20.22	17.63	27.35	17.51	12.1	15.51	14.72	20.12	23.08	28.75	15.33	27.33
28448	chr17	47952200	47953200	-28068	Foxp4	7.83	11.98	-1	-0.67	7.83	7.3	9.45	12.87	11.98	11.98	3.22	8.29	8.32	7.26	6.31	7.66	6.6	14.1	12.26	11.65	14.69	17.38	7.36	11.21
37395	chr2	118975957	118976957	49960	Chst14	33.26	29.29	-0.14	-0.12	33.26	16.29	22.1	18.89	29.29	33.53	38.64	27.62	23.79	12.45	12.62	24.08	25.29	16.92	20.85	16.94	18.88	28.75	32.5	26.63
51626	chr5	138724888	138725888	-29693	Fam20c	7.35	22.64	-1.95	-2.71	7.35	7.16	6.95	3.28	22.64	10.78	1.61	9.67	4.76	8.3	8.41	5.47	5.5	9.87	2.45	5.29	2.1	20.72	17.78	29.43
13593	chr12	40222254	40223254	57	Mir1938	187.64	168.91	-0.21	-0.6	187.64	115.98	115.76	97.78	168.91	219.16	159.39	184.37	172.44	85.05	90.46	112.75	123.15	111.38	100.57	85.76	107	161.12	165.55	180.07
2543	chr1	105843545	105844545	63322	Tnfrsf11a	33.18	25.92	0	0	33.18	9.88	6.89	11.59	25.92	44.31	24.15	31.07	11.89	9.33	8.41	10.95	5.5	4.23	7.36	12.71	14.69	24.07	26.37	27.33
33395	chr19	37955052	37956052	88025	Myof	11.88	13.12	-0.53	-0.34	11.88	8.35	5.07	7.32	13.12	16.77	6.44	12.43	8.32	6.22	10.52	6.57	4.4	4.23	6.13	9.53	6.29	16.05	13.49	9.81
52089	chr5	151726782	151727782	-76074	Rfc3	5.48	11.22	-1.34	-1.04	5.48	5.12	7.37	10.24	11.22	4.79	7.51	4.14	5.95	4.15	5.26	8.76	7.7	5.64	8.59	9.53	12.59	10.7	11.04	11.91
12909	chr12	10589335	10590335	143447	Gm38407	14.91	13.5	-0.17	-0.09	14.91	16.32	15.26	14.84	13.5	17.96	15.03	11.74	24.97	13.48	10.52	8.76	18.69	18.33	17.17	8.47	18.88	10.03	17.17	13.31
46088	chr4	95506952	95507952	-50055	Fggy	31.88	28.21	-0.21	-0.18	31.88	12.21	10.61	12.28	28.21	25.15	26.3	44.19	17.84	10.37	8.41	9.85	12.1	9.87	14.72	9.53	12.59	30.08	30.04	24.52
61901	chr8	84203264	84204264	-4754	Mir23a	45.05	45.55	-0.36	-0.47	45.05	25.59	24.92	22.18	45.55	58.68	39.18	37.29	29.73	20.74	26.3	25.18	24.19	25.38	23.3	26.47	16.78	36.1	56.41	44.14
24022	chr15	89475662	89476662	-90	C230037L18Rik	31.91	42.88	-0.78	-1.42	31.91	38.27	30.46	33.56	42.88	23.95	33.81	37.98	51.14	35.26	28.4	28.46	31.89	31.02	34.34	26.47	39.86	42.79	46.6	39.24
52825	chr6	33726957	33727957	-301991	Lrguk	19.45	10.3	0.62	-0.47	19.45	4.02	4.97	4.51	10.3	25.15	16.64	16.57	4.76	4.15	3.16	3.28	8.8	2.82	6.13	5.29	2.1	11.37	10.42	9.11
10885	chr11	71776674	71777674	26159	Wscd1	16.98	6.71	1.02	-0.79	16.98	6.56	6.53	4.38	6.71	21.56	15.56	13.81	7.14	5.19	7.36	9.85	5.5	4.23	3.68	3.18	6.29	6.02	4.29	9.81
17684	chr13	73271502	73272502	11505	Irx4	21.09	12.77	0.36	-0.24	21.09	6.6	10.87	6.74	12.77	25.15	23.61	14.5	8.32	6.22	5.26	12.04	12.1	8.46	8.59	9.53	2.1	10.03	17.78	10.51
20951	chr14	76695440	76696440	18372	1700108F19Rik	24.02	43.11	-1.19	-2.67	24.02	11.9	9.77	11	43.11	26.35	23.61	22.1	10.7	16.59	8.41	8.76	12.1	8.46	9.81	10.59	12.59	35.43	44.15	49.75
43909	chr4	6990540	6991540	-317	Tox	86.54	71.84	-0.09	-0.11	86.54	44.36	38.29	44.94	71.84	91.02	67.08	101.51	63.03	29.04	41.02	33.93	42.88	38.07	45.38	30.7	58.74	70.2	86.45	58.86
8441	chr10	117730923	117731923	14935	Slc35e3	18.15	9.78	0.57	-0.41	18.15	11.23	6.58	11.23	9.78	19.16	16.64	18.64	10.7	10.37	12.62	6.57	3.3	9.87	14.72	8.47	10.49	11.37	11.65	6.31
46822	chr4	118179413	118180413	130	Kdm4a	118.14	124.44	-0.43	-1.38	118.14	85.38	79.08	69.45	124.44	134.13	103.58	116.7	122.49	70.53	63.11	84.29	82.47	70.49	58.87	55.06	94.41	130.37	114.04	128.92
23665	chr15	77920613	77921613	7881	Txn2	15.63	4.72	1.38	-1.03	15.63	12.06	12.12	6.15	4.72	14.37	11.81	20.72	14.27	12.45	9.47	14.23	16.49	5.64	11.04	7.41	0	6.02	6.74	1.4
60965	chr8	48136686	48137686	27173	Dctd	43.47	10.21	1.69	-2.78	43.47	15.11	22.1	16.04	10.21	55.09	31.13	44.19	20.22	10.37	14.73	18.61	20.89	26.79	19.62	20.12	8.39	8.02	3.68	18.92
34681	chr2	19732711	19733711	75149	Otud1	6.1	33.03	-2.8	-5.89	6.1	3.93	3.71	1.58	33.03	7.19	6.98	4.14	2.38	3.11	6.31	2.19	3.3	5.64	3.68	1.06	0	23.4	44.15	31.53
64741	chr9	57261962	57262962	137	1700017B05Rik	39.9	35.52	-0.19	-0.19	39.9	18.09	14.1	22.84	35.52	51.5	34.35	33.84	16.65	17.63	19.99	16.42	13.19	12.69	30.66	10.59	27.27	38.78	35.56	32.23
841	chr1	40157648	40158648	-66932	Il1r1	13.61	4.19	1.3	-0.92	13.61	5.12	8.51	9.26	4.19	17.96	11.81	11.05	5.95	4.15	5.26	8.76	5.5	11.28	9.81	13.76	4.2	4.68	3.68	4.2
58621	chr7	110941465	110942465	4222	Mrvi1	18.78	29.88	-1.06	-1.59	18.78	21.74	22.2	12.93	29.88	14.37	15.03	26.93	29.73	19.71	15.78	16.42	21.99	28.2	13.49	12.71	12.59	30.08	24.53	35.03
37156	chr2	112367530	112368530	-3	Emc4	36.85	38.9	-0.43	-0.59	36.85	19.47	17.91	25.67	38.9	39.52	26.83	44.19	24.97	14.52	18.93	18.61	15.39	19.74	23.3	22.23	31.47	41.45	37.4	37.84
32986	chr19	25450994	25451994	-54212	Dmrt1	18.82	16.9	-0.2	-0.12	18.82	11.04	8.62	11	16.9	21.56	15.56	19.33	14.27	6.22	12.62	8.76	14.29	2.82	9.81	12.71	10.49	16.71	22.07	11.91
52047	chr5	150583433	150584433	10592	N4bp2l1	18.35	6.36	1.17	-1.01	18.35	12.36	24.96	14.04	6.36	13.17	17.71	24.17	21.41	7.26	8.41	24.08	19.79	31.02	22.08	13.76	6.29	7.35	6.13	5.61
62825	chr8	116585743	116586743	81228	Dynlrb2	14.75	5.92	0.95	-0.68	14.75	7.74	5.07	6.03	5.92	15.57	10.73	17.95	10.7	6.22	6.31	4.38	6.6	4.23	8.59	7.41	2.1	6.02	6.13	5.61
34417	chr2	10293346	10294346	-76605	Sfmbt2	95.88	31.82	1.21	-4.06	95.88	27.26	33.21	29.91	31.82	101.79	71.91	113.94	45.19	15.56	21.04	39.41	26.39	33.84	30.66	33.88	25.18	38.78	25.14	31.53
33164	chr19	31336094	31337094	-120198	8430431K14Rik	13.91	5.7	0.83	-0.53	13.91	7.35	7.63	4.62	5.7	17.96	13.42	10.36	9.51	5.19	7.36	9.85	8.8	4.23	8.59	3.18	2.1	6.69	5.52	4.9
2953	chr1	128691973	128692973	-100174	Cxcr4	16.69	9.43	0.54	-0.31	16.69	3.52	9.41	14.86	9.43	9.58	22.54	17.95	1.19	6.22	3.16	4.38	15.39	8.46	17.17	14.82	12.59	2.01	12.26	14.01
60609	chr8	36082239	36083239	-12089	Prag1	25.55	5.77	1.8	-2.25	25.55	5.81	8.14	6.85	5.77	26.35	22	28.31	5.95	7.26	4.21	9.85	3.3	11.28	11.04	7.41	2.1	6.02	4.29	7.01
8745	chr10	126082293	126083293	116574	Lrig3	9.98	29.01	-1.9	-3.44	9.98	5.17	4.39	6.25	29.01	11.98	9.66	8.29	7.14	3.11	5.26	2.19	1.1	9.87	6.13	2.12	10.49	18.72	36.79	31.53
17568	chr13	68797453	68798453	200514	1700001L19Rik	19.15	4.41	1.76	-1.6	19.15	19.23	12.28	4.68	4.41	19.16	8.59	29.69	27.35	11.41	18.93	8.76	15.39	12.69	2.45	5.29	6.29	5.35	3.68	4.2
26911	chr16	91830039	91831039	101091	Atp5o	19.52	8.77	0.76	-0.6	19.52	8.44	8.67	16.31	8.77	28.74	13.95	15.88	10.7	8.3	6.31	12.04	5.5	8.46	18.4	13.76	16.78	10.03	8.58	7.71
61257	chr8	61340254	61341254	-51882	1700001D01Rik	23.84	10.1	0.87	-0.79	23.84	9.77	9.29	7.96	10.1	16.77	30.59	24.17	9.51	13.48	6.31	15.33	5.5	7.05	4.91	8.47	10.49	14.71	8.58	7.01
67956	chrX	140510527	140511527	31641	Tsc22d3	39.02	27.89	0.14	-0.12	39.02	38.47	32.38	28.88	27.89	33.53	33.81	49.72	55.9	31.11	28.4	30.65	24.19	42.29	31.89	23.29	31.47	32.09	26.37	25.22
35671	chr2	56257231	56258231	-528080	Mir195b	29.58	23.06	0.02	-0.01	29.58	7.1	3.86	7.01	23.06	27.54	22.54	38.67	11.89	4.15	5.26	5.47	3.3	2.82	7.36	5.29	8.39	18.72	29.43	21.02
6069	chr10	38992570	38993570	27555	Lama4	11.11	11.78	-0.42	-0.23	11.11	9.6	13.01	11.12	11.78	4.79	16.1	12.43	13.08	5.19	10.52	8.76	17.59	12.69	12.26	14.82	6.29	14.04	12.88	8.41
22665	chr15	35740697	35741697	-80150	Mir875	11.6	11.92	-0.44	-0.26	11.6	2.77	4.07	3.4	11.92	7.19	14.49	13.12	0	6.22	2.1	3.28	3.3	5.64	4.91	3.18	2.1	14.04	9.81	11.91
14016	chr12	58537938	58538938	-269180	Clec14a	12.39	22.74	-1.23	-1.54	12.39	6.26	5.59	6.72	22.74	10.78	13.95	12.43	8.32	4.15	6.31	6.57	8.8	1.41	8.59	5.29	6.29	22.06	15.33	30.83
5632	chr10	21794099	21795099	-87585	Sgk1	24.22	6.71	1.51	-1.51	24.22	7.59	4.7	4.5	6.71	32.33	27.91	12.43	7.14	9.33	6.31	3.28	6.6	4.23	6.13	3.18	4.2	9.36	7.97	2.8
24891	chr16	17208578	17209578	943	Rimbp3	59.31	43.43	0.09	-0.09	59.31	23.77	25.91	33.69	43.43	59.88	53.13	64.91	28.54	23.85	18.93	26.27	27.49	23.97	29.44	33.88	37.76	46.13	33.72	50.45
62233	chr8	95361995	95362995	10199	Mmp15	12.77	15.07	-0.63	-0.51	12.77	9.08	7.94	10.05	15.07	10.78	12.34	15.19	9.51	9.33	8.41	6.57	8.8	8.46	12.26	7.41	10.49	16.05	16.55	12.61
8584	chr10	121515939	121516939	-40189	Rassf3	11.72	8.55	0.08	-0.03	11.72	8.84	7.52	7.37	8.55	10.78	11.27	13.12	11.89	6.22	8.41	12.04	7.7	2.82	7.36	8.47	6.29	6.02	9.81	9.81
23699	chr15	78947356	78948356	132	Triobp	57.97	47.39	-0.07	-0.07	57.97	25.48	32.91	24.68	47.39	63.47	53.13	57.31	35.68	19.71	21.04	37.22	31.89	29.61	24.53	22.23	27.27	46.8	48.44	46.94
39876	chr3	21986159	21987159	-89993	Tbl1xr1	9.96	13.71	-0.79	-0.53	9.96	9.1	7.57	2.63	13.71	16.77	9.66	3.45	9.51	7.26	10.52	7.66	6.6	8.46	3.68	2.12	2.1	15.38	15.94	9.81
35625	chr2	52949922	52950922	92554	Fmnl2	18.63	5.34	1.47	-1.29	18.63	9.18	7.63	4.22	5.34	16.77	17.71	21.41	11.89	8.3	7.36	3.28	5.5	14.1	7.36	5.29	0	2.01	9.81	4.2
40526	chr3	50235681	50236681	207432	Slc7a11	62.2	14.64	1.72	-4.78	62.2	12.06	15.78	13.11	14.64	71.86	47.76	66.98	14.27	12.45	9.47	14.23	17.59	15.51	17.17	15.88	6.29	12.03	17.17	14.71
64367	chr9	44334349	44335349	134	H2afx	81.82	101.74	-0.66	-2.03	81.82	40.37	37.61	41.28	101.74	100.6	79.96	64.91	67.79	22.82	30.5	33.93	35.19	43.7	41.7	33.88	48.25	96.94	116.5	91.79
30945	chr18	47768655	47769655	20378	Gm4146	7.01	10.46	-0.9	-0.55	7.01	3.26	2.51	4.51	10.46	2.4	9.66	8.98	3.57	6.22	0	0	3.3	4.23	6.13	5.29	2.1	10.7	12.26	8.41
4276	chr1	171617143	171618143	-10233	Ly9	20.66	15.57	0.05	-0.03	20.66	13.95	15.15	13.1	15.57	11.98	23.08	26.93	17.84	13.48	10.52	15.33	13.19	16.92	17.17	11.65	10.49	12.03	22.07	12.61
35566	chr2	51305262	51306262	63931	Gm13497	11.8	17.97	-0.99	-0.91	11.8	4.82	5.27	2.64	17.97	4.79	11.27	19.33	7.14	3.11	4.21	5.47	3.3	7.05	3.68	4.24	0	15.38	14.72	23.82
9545	chr11	25794196	25795196	-407544	Mir6372	25.11	5.91	1.68	-1.63	25.11	7.75	8.94	1.88	5.91	15.57	20.39	39.36	10.7	5.19	7.36	8.76	11	7.05	2.45	3.18	0	2.67	2.45	12.61
3832	chr1	159657870	159658870	134601	Tnr	50.99	20.88	0.93	-1.63	50.99	24.74	24.19	14.62	20.88	63.47	37.03	52.48	34.49	17.63	22.09	19.7	27.49	25.38	19.62	11.65	12.59	21.39	25.14	16.12
30653	chr18	37822138	37823138	3092	Pcdhgc5	31.51	26.73	-0.13	-0.09	31.51	22.37	33.79	22.23	26.73	20.36	32.74	41.43	36.87	18.67	11.57	41.6	32.99	26.79	24.53	23.29	18.88	30.08	26.98	23.12
17399	chr13	60618087	60619087	16376	Dapk1	12.99	7.91	0.42	-0.22	12.99	11	9.3	19.54	7.91	15.57	7.51	15.88	13.08	5.19	14.73	10.95	9.9	7.05	26.98	19.06	12.59	9.36	7.36	7.01
33832	chr19	50419124	50420124	259022	Sorcs1	66.79	15.89	1.73	-5.14	66.79	16.45	16.57	11.57	15.89	63.47	59.57	77.34	19.03	12.45	17.88	15.33	23.09	11.28	7.36	8.47	18.88	17.38	18.39	11.91
38405	chr2	149742363	149743363	-87920	Syndig1	11.01	6.72	0.42	-0.18	11.01	9.81	3.14	1.82	6.72	7.19	18.25	7.6	19.03	8.3	2.1	1.09	5.5	2.82	1.23	4.24	0	3.34	9.81	7.01
18994	chr13	118272255	118273255	114497	Mrps30	13.71	8.69	0.3	-0.16	13.71	5.22	2.87	1.12	8.69	11.98	13.95	15.19	8.32	2.07	5.26	3.28	1.1	4.23	1.23	2.12	0	10.03	10.42	5.61
47413	chr4	136027490	136028490	-6341	Eloa	16.86	4.52	1.6	-1.35	16.86	12.16	10.35	9.54	4.52	20.36	15.03	15.19	16.65	11.41	8.41	8.76	11	11.28	8.59	11.65	8.39	2.01	7.36	4.2
14909	chr12	91539898	91540898	49251	Gtf2a1	10.85	5.5	0.56	-0.28	10.85	7.31	4.7	8.26	5.5	14.37	11.27	6.91	8.32	5.19	8.41	7.66	2.2	4.23	11.04	9.53	4.2	6.69	4.91	4.9
22364	chr15	21884879	21885879	773927	Cdh12	19.21	11.74	0.36	-0.23	19.21	4.47	8.41	5.33	11.74	14.37	17.71	25.55	7.14	2.07	4.21	7.66	7.7	9.87	1.23	8.47	6.29	14.71	13.49	7.01
55585	chr6	136672172	136673172	-10779	Plbd1	7.6	16.89	-1.58	-1.79	7.6	8.55	11.29	8.79	16.89	5.99	6.44	10.36	13.08	4.15	8.41	7.66	12.1	14.1	7.36	12.71	6.29	15.38	17.78	17.52
22145	chr15	9454921	9455921	19393	Capsl	14.04	8.53	0.32	-0.17	14.04	9.68	10.92	11.91	8.53	17.96	9.66	14.5	15.46	6.22	7.36	10.95	7.7	14.1	7.36	5.29	23.08	8.69	9.2	7.71
66890	chrX	13881680	13882680	-35624	Cask	10.49	6.43	0.37	-0.16	10.49	4.21	7.58	4.27	6.43	8.38	13.42	9.67	9.51	2.07	1.05	6.57	7.7	8.46	8.59	2.12	2.1	5.35	5.52	8.41
26626	chr16	81175127	81176127	-25070	Ncam2	36.59	24.05	0.23	-0.21	36.59	13.61	7.73	13.69	24.05	37.13	28.44	44.19	17.84	9.33	13.67	8.76	8.8	5.64	22.08	10.59	8.39	24.07	26.37	21.72
19420	chr14	20702545	20703545	18	Chchd1	28.18	33.61	-0.64	-0.91	28.18	15.49	16.66	16.84	33.61	29.94	26.3	28.31	21.41	12.45	12.62	14.23	13.19	22.56	14.72	14.82	20.98	26.74	35.56	38.54
9924	chr11	38747203	38748203	-227658	Gm12130	18.41	17.47	-0.32	-0.22	18.41	12.48	7.21	12.11	17.47	17.96	14.49	22.79	15.46	7.26	14.73	5.47	7.7	8.46	18.4	9.53	8.39	22.73	17.78	11.91
1018	chr1	45881240	45882240	43854	Slc40a1	29.24	9.54	1.28	-1.6	29.24	15.62	14.99	9.95	9.54	28.74	23.08	35.91	24.97	13.48	8.41	20.8	14.29	9.87	17.17	8.47	4.2	13.37	6.13	9.11
41325	chr3	79993681	79994681	108251	Fam198b	7.83	29.02	-2.26	-4	7.83	9.34	8.47	3.86	29.02	2.4	10.73	10.36	15.46	4.15	8.41	8.76	11	5.64	0	5.29	6.29	23.4	30.04	33.63
741	chr1	37077855	37078855	-138828	Tmem131	3.29	13	-2.33	-2.25	3.29	4.73	6.53	5.9	13	3.59	2.15	4.14	4.76	3.11	6.31	6.57	8.8	4.23	6.13	3.18	8.39	14.04	11.65	13.31
22115	chr15	8614720	8615720	95587	Slc1a3	13.88	7.3	0.57	-0.33	13.88	9.87	4.29	5.62	7.3	9.58	13.42	18.64	11.89	11.41	6.31	0	4.4	8.46	7.36	7.41	2.1	5.35	6.74	9.81
67962	chrX	140600424	140601424	-402	Tsc22d3	16.63	15.94	-0.26	-0.15	16.63	6.55	9.92	4.57	15.94	8.38	16.64	24.86	7.14	8.3	4.21	14.23	9.9	5.64	7.36	4.24	2.1	9.36	20.23	18.22
54017	chr6	82956546	82957546	10124	M1ap	5.79	15.01	-1.77	-1.85	5.79	3.32	3.03	5.32	15.01	4.79	4.29	8.29	4.76	3.11	2.1	3.28	4.4	1.41	8.59	3.18	4.2	12.7	14.1	18.22
56572	chr7	29768044	29769044	-8	Zfp84	58.94	43.36	0.09	-0.09	58.94	38.89	30.2	21.58	43.36	55.09	54.74	66.98	57.08	25.93	33.66	32.84	35.19	22.56	18.4	19.06	27.27	36.1	53.34	40.64
23240	chr15	59745923	59746923	48536	Gm19510	12.99	9.58	0.05	-0.02	12.99	6.91	6.27	13.99	9.58	17.96	8.59	12.43	7.14	5.19	8.41	8.76	4.4	5.64	13.49	15.88	12.59	10.7	6.13	11.91
32170	chr18	88340696	88341696	553011	Socs6	15.04	5.27	1.11	-0.75	15.04	6.35	6.26	2.52	5.27	14.37	10.73	20.03	10.7	4.15	4.21	9.85	3.3	5.64	1.23	2.12	4.2	10.03	3.68	2.1
10498	chr11	59775294	59776294	11428	Pld6	14.27	8.49	0.39	-0.21	14.27	3.98	8.67	9.12	8.49	14.37	13.95	14.5	3.57	2.07	6.31	10.95	6.6	8.46	7.36	7.41	12.59	9.36	4.91	11.21
25491	chr16	35583274	35584274	42412	Sema5b	24.53	7.46	1.36	-1.55	24.53	7.02	11.08	5.44	7.46	26.35	18.25	29	9.51	2.07	9.47	7.66	14.29	11.28	3.68	6.35	6.29	8.02	7.36	7.01
21571	chr14	105920663	105921663	-24344	Spry2	47.76	46.22	-0.33	-0.42	47.76	18.09	15.41	21.34	46.22	50.3	32.2	60.77	24.97	11.41	17.88	16.42	14.29	15.51	28.21	14.82	20.98	56.16	40.47	42.04
37317	chr2	117180208	117181208	-4419	Mir674	11.68	10.15	-0.13	-0.06	11.68	7.95	7.63	5.85	10.15	13.17	12.88	8.98	7.14	8.3	8.41	9.85	8.8	4.23	4.91	6.35	6.29	13.37	7.97	9.11
64508	chr9	49493668	49494668	-7943	Ttc12	7.44	14.61	-1.35	-1.29	7.44	5.51	8.57	5.85	14.61	5.99	8.05	8.29	7.14	5.19	4.21	8.76	9.9	7.05	4.91	6.35	6.29	12.03	12.88	18.92
50627	chr5	105951878	105952878	75810	Zfp326	12.11	5.53	0.72	-0.4	12.11	8.09	6.27	8.41	5.53	7.19	13.95	15.19	10.7	8.3	5.26	8.76	4.4	5.64	7.36	5.29	12.59	8.02	3.68	4.9
27754	chr17	26011604	26012604	9756	Rab11fip3	24.27	20.09	-0.08	-0.05	24.27	12.46	14.68	14.9	20.09	20.36	28.98	23.48	15.46	11.41	10.52	12.04	16.49	15.51	18.4	9.53	16.78	21.39	22.07	16.82
8306	chr10	112961913	112962913	-33387	Atxn7l3b	69.53	58.56	-0.13	-0.15	69.53	32.71	40.02	31.76	58.56	63.47	47.76	97.36	42.81	30.08	25.24	38.31	45.08	36.66	33.11	28.59	33.57	56.83	65.61	53.25
55723	chr6	140696251	140697251	69866	Aebp2	11.94	5.86	0.74	-0.42	11.94	5.15	3.86	6.08	5.86	9.58	14.49	11.74	7.14	7.26	1.05	5.47	3.3	2.82	9.81	4.24	4.2	6.02	7.36	4.2
1535	chr1	65048415	65049415	2248	Cryge	25.81	12.84	0.63	-0.6	25.81	10.22	10.81	8.49	12.84	22.75	23.61	31.07	11.89	11.41	7.36	9.85	9.9	12.69	8.59	10.59	6.29	14.71	9.81	14.01
5299	chr10	10546306	10547306	11401	Rab32	14.96	21.73	-0.89	-1.01	14.96	6.91	9.51	6.92	21.73	14.37	13.95	16.57	7.14	6.22	7.36	8.76	9.9	9.87	4.91	11.65	4.2	21.39	17.17	26.63
3775	chr1	157886889	157887889	361219	Sec16b	37.48	13.91	1.06	-1.58	37.48	8	9.29	9.88	13.91	34.73	30.05	47.65	8.32	7.26	8.41	14.23	6.6	7.05	8.59	8.47	12.59	14.04	17.17	10.51
38880	chr2	164070536	164071536	66	Tomm34	67.84	87.85	-0.74	-2.31	67.84	44.18	41.73	34.66	87.85	73.05	57.96	72.5	59.46	38.37	34.71	44.88	35.19	45.11	42.93	21.18	39.86	65.52	99.94	98.09
59151	chr7	127911994	127912994	-23	Kat8	46.4	41.55	-0.21	-0.22	46.4	26.98	24.39	23.81	41.55	43.11	47.76	48.34	29.73	23.85	27.35	26.27	18.69	28.2	20.85	25.41	25.18	46.8	33.72	44.14
53557	chr6	59412320	59413320	13470	Gprin3	10.92	38.27	-2.17	-5.48	10.92	8.33	7.73	9.71	38.27	11.98	6.98	13.81	8.32	11.41	5.26	13.14	4.4	5.64	4.91	9.53	14.69	34.76	42.92	37.14
52949	chr6	37617118	37618118	87445	Akr1d1	24.15	10.19	0.85	-0.84	24.15	23.49	27.11	16.03	10.19	26.35	19.86	26.24	29.73	20.74	19.99	21.89	24.19	35.25	19.62	15.88	12.59	8.69	8.58	13.31
67093	chrX	47482509	47483509	409604	Smarca1	14.2	14.7	-0.43	-0.3	14.2	3.72	2.24	1.52	14.7	14.37	12.34	15.88	5.95	3.11	2.1	1.09	0	5.64	2.45	2.12	0	12.03	15.94	16.12
3780	chr1	158054545	158055545	301215	Brinp2	20.93	6.81	1.18	-1.08	20.93	7	6.01	3.63	6.81	20.36	13.42	29	9.51	6.22	5.26	6.57	4.4	7.05	2.45	4.24	4.2	8.69	6.13	5.61
26727	chr16	86536258	86537258	269755	Gm32461	8.88	12.25	-0.82	-0.58	8.88	3.88	3.03	2.92	12.25	8.38	8.59	9.67	1.19	5.19	5.26	5.47	2.2	1.41	2.45	2.12	4.2	17.38	11.65	7.71
8992	chr11	5181571	5182571	-29811	Emid1	15.31	12.9	-0.1	-0.05	15.31	9.29	5.85	11.11	12.9	28.74	7.51	9.67	5.95	12.45	9.47	3.28	4.4	9.87	12.26	10.59	10.49	12.7	14.1	11.91
53667	chr6	66806051	66807051	-1219	Vmn1r39	36.06	9.94	1.51	-2.36	36.06	11.6	13.32	8.26	9.94	38.32	28.44	41.43	20.22	9.33	5.26	12.04	11	16.92	11.04	11.65	2.1	14.04	7.36	8.41
56351	chr7	19830351	19831351	-8096	Bcl3	11.31	4.76	0.86	-0.46	11.31	11.51	13.01	13.39	4.76	14.37	6.44	13.12	9.51	15.56	9.47	14.23	12.1	12.69	23.3	10.59	6.29	5.35	6.13	2.8
18343	chr13	98867531	98868531	23011	Tnpo1	15.78	8.53	0.53	-0.34	15.78	10.38	11.54	8.09	8.53	17.96	15.56	13.81	15.46	7.26	8.41	15.33	6.6	12.69	7.36	12.71	4.2	10.7	8.58	6.31
35139	chr2	33430618	33431618	206	Zbtb34	35.12	24.63	0.18	-0.14	35.12	16.29	7.1	13.45	24.63	38.32	31.13	35.91	23.79	12.45	12.62	10.95	3.3	7.05	17.17	10.59	12.59	17.38	36.18	20.32
67863	chrX	136115228	136116228	10806	5730412P04Rik	46.66	28.38	0.35	-0.41	46.66	14.16	20.42	22.05	28.38	49.1	37.03	53.86	22.6	7.26	12.62	17.51	19.79	23.97	20.85	22.23	23.08	27.41	22.69	35.03
63140	chr8	124960203	124961203	-11449	Egln1	7.27	16.98	-1.57	-1.75	7.27	7.31	5.17	7.19	16.98	4.79	8.05	8.98	8.32	5.19	8.41	5.47	4.4	5.64	3.68	7.41	10.49	16.71	20.23	14.01
4579	chr1	181584668	181585668	-73717	Ccdc121	13.01	8.27	0.29	-0.14	13.01	3.58	4.34	5.51	8.27	15.57	14.49	8.98	2.38	4.15	4.21	4.38	4.4	4.23	4.91	7.41	4.2	8.69	4.91	11.21
67936	chrX	139814956	139815956	14648	Cldn2	8.93	12.16	-0.82	-0.57	8.93	14.49	7.99	2.58	12.16	4.79	7.51	14.5	22.6	12.45	8.41	12.04	7.7	4.23	2.45	3.18	2.1	10.03	15.94	10.51
46271	chr4	100307085	100308085	-171282	Ube2u	17.82	5.86	1.28	-1.03	17.82	5.82	5.54	2.99	5.86	15.57	12.34	25.55	5.95	5.19	6.31	5.47	5.5	5.64	3.68	3.18	2.1	6.02	2.45	9.11
44547	chr4	33555211	33556211	117630	Mir8118	20.6	10.86	0.55	-0.41	20.6	8.38	7	9.08	10.86	13.17	23.08	25.55	9.51	10.37	5.26	8.76	6.6	5.64	13.49	11.65	2.1	10.7	8.58	13.31
31985	chr18	80455230	80456230	13937	Ctdp1	11.22	11.01	-0.27	-0.12	11.22	10.58	13.01	12.27	11.01	15.57	9.12	8.98	11.89	9.33	10.52	14.23	12.1	12.69	14.72	7.41	14.69	5.35	7.36	20.32
29962	chr18	11288217	11289217	-236150	1010001N08Rik	25.2	29.95	-0.61	-0.7	25.2	3.28	6.37	7.95	29.95	38.32	19.32	17.95	3.57	2.07	4.21	5.47	6.6	7.05	4.91	4.24	14.69	29.42	33.11	27.33
60653	chr8	36819797	36820797	-87243	Dlc1	61.66	35.29	0.46	-0.73	61.66	25.29	17.45	10.6	35.29	56.29	56.89	71.81	39.25	13.48	23.14	14.23	19.79	18.33	8.59	12.71	10.49	33.43	32.5	39.94
60212	chr8	23207923	23208923	30	Gpat4	98.5	97.01	-0.34	-0.79	98.5	46.85	38.39	44.97	97.01	122.15	79.43	93.91	57.08	48.75	34.71	40.5	35.19	39.47	38.02	42.35	54.55	91.59	99.94	99.49
49140	chr5	44151099	44152099	-49863	Prom1	12.81	23.51	-1.24	-1.62	12.81	5.81	2.98	8.94	23.51	8.38	10.73	19.33	5.95	6.22	5.26	2.19	1.1	5.64	11.04	5.29	10.49	21.39	28.82	20.32
2979	chr1	129750807	129751807	478003	Thsd7b	19.95	8.18	0.94	-0.76	19.95	9.13	8.99	8.19	8.18	14.37	17.17	28.31	10.7	9.33	7.36	9.85	14.29	2.82	9.81	8.47	6.29	5.35	12.88	6.31
36227	chr2	74372716	74373716	-65499	4930441J16Rik	8.12	13.47	-1.11	-0.91	8.12	6.46	5.17	10.3	13.47	4.79	6.44	13.12	4.76	8.3	6.31	7.66	2.2	5.64	9.81	10.59	10.49	12.03	12.26	16.12
67034	chrX	38189499	38190499	206	Zbtb33	68.98	55.34	-0.04	-0.04	68.98	28.82	34.74	30.35	55.34	80.24	54.2	72.5	40.44	17.63	28.4	29.56	35.19	39.47	25.76	27.53	37.76	55.49	60.09	50.45
19045	chr13	119736652	119737652	18730	Nim1k	13.46	6.63	0.71	-0.42	13.46	12.53	8.41	19.28	6.63	16.77	9.12	14.5	16.65	6.22	14.73	8.76	6.6	9.87	7.36	14.82	35.67	5.35	6.13	8.41
63619	chr9	17816730	17817730	-475037	Chordc1	39.48	64.96	-1.08	-2.87	39.48	22.62	13.43	7.55	64.96	23.95	46.15	48.34	34.49	19.71	13.67	15.33	16.49	8.46	3.68	8.47	10.49	60.17	62.54	72.17
23750	chr15	80090577	80091577	-257	Syngr1	23.13	15.94	0.18	-0.11	23.13	7.65	7.88	9	15.94	25.15	26.3	17.95	8.32	6.22	8.41	18.61	2.2	2.82	12.26	4.24	10.49	18.05	17.17	12.61
50842	chr5	113789049	113790049	10803	Tmem119	6.75	11.73	-1.15	-0.84	6.75	9.63	6.11	8.71	11.73	8.38	9.12	2.76	14.27	8.3	6.31	5.47	4.4	8.46	6.13	7.41	12.59	13.37	9.2	12.61
15332	chr12	105453479	105454479	123	D430019H16Rik	47.62	41.84	-0.18	-0.2	47.62	21.45	24.96	23.5	41.84	51.5	40.25	51.1	30.92	16.59	16.83	32.84	20.89	21.15	22.08	19.06	29.37	40.11	44.76	40.64
47201	chr4	130296908	130297908	-11370	Fabp3	12.71	7	0.49	-0.27	12.71	9.24	9.25	7.13	7	11.98	12.34	13.81	4.76	13.48	9.47	6.57	9.9	11.28	2.45	6.35	12.59	9.36	6.74	4.9
53997	chr6	82456909	82457909	54934	Tacr1	31.28	12.3	0.92	-1.04	31.28	17.71	22.05	17.85	12.3	38.32	23.08	32.45	16.65	22.82	13.67	17.51	27.49	21.15	20.85	18	14.69	8.69	8.58	19.62
57677	chr7	75853862	75854862	6024	Klhl25	17.65	10.68	0.43	-0.28	17.65	16.03	18.08	15.2	10.68	14.37	22	16.57	17.84	17.63	12.62	15.33	21.99	16.92	17.17	11.65	16.78	11.37	12.26	8.41
1271	chr1	57528640	57529640	-122466	Tyw5	80.8	20.5	1.62	-5.33	80.8	24.54	25.28	27.2	20.5	82.63	56.89	102.89	38.06	14.52	21.04	25.18	25.29	25.38	25.76	26.47	29.37	21.39	23.3	16.82
6921	chr10	69785194	69786194	-139838	Ank3	29.21	12.39	0.91	-1	29.21	13.05	14.31	9.02	12.39	20.36	37.57	29.69	13.08	15.56	10.52	14.23	13.19	15.51	12.26	10.59	4.2	12.03	15.33	9.81
10048	chr11	44398521	44399521	-1042	Il12b	34.88	27.68	-0.02	-0.02	34.88	17.63	12.64	14.26	27.68	35.93	30.05	38.67	22.6	14.52	15.78	10.95	14.29	12.69	12.26	11.65	18.88	27.41	27.59	28.03
50239	chr5	92368794	92369794	-5998	Cxcl11	9.35	9.84	-0.42	-0.22	9.35	9.33	8.47	13.75	9.84	13.17	5.9	8.98	15.46	6.22	6.31	6.57	13.19	5.64	15.94	14.82	10.49	10.7	10.42	8.41
56516	chr7	28436623	28437623	-324	Gmfg	49.79	49.71	-0.37	-0.53	49.79	27.31	24.44	28.13	49.71	45.51	42.4	61.46	38.06	21.78	22.09	26.27	23.09	23.97	38.02	21.18	25.18	64.18	42.92	42.04
40423	chr3	41284580	41285580	-202034	Pgrmc2	22.34	28.59	-0.7	-0.86	22.34	19.23	15.83	23.14	28.59	22.75	16.64	27.62	27.35	12.45	17.88	9.85	16.49	21.15	14.72	16.94	37.76	21.39	39.85	24.52
21409	chr14	101476998	101477998	131693	Tbc1d4	54.52	24.67	0.79	-1.33	54.52	53.51	42.11	22.06	24.67	69.46	49.91	44.19	82.06	29.04	49.44	40.5	50.58	35.25	20.85	24.35	20.98	18.05	30.04	25.92
50942	chr5	116023978	116024978	-50	Prkab1	50.22	54.92	-0.48	-0.86	50.22	37.58	28.89	30.5	54.92	49.1	40.79	60.77	49.95	22.82	39.97	28.46	28.59	29.61	22.08	21.18	48.25	43.46	58.25	63.06
9710	chr11	32226012	32227012	7	Mpg	36.5	25.93	0.15	-0.13	36.5	18.75	18.44	22.29	25.93	34.73	30.59	44.19	23.79	11.41	21.04	17.51	20.89	16.92	25.76	20.12	20.98	23.4	31.27	23.12
58393	chr7	100911148	100912148	20513	Arhgef17	25.26	15.35	0.37	-0.3	25.26	26.55	23.34	11.47	15.35	27.54	26.83	21.41	35.68	15.56	28.4	28.46	17.59	23.97	12.26	11.65	10.49	16.71	15.33	14.01
25359	chr16	31591921	31592921	-25712	Gm536	43.52	55.72	-0.71	-1.43	43.52	15.63	18.6	31.91	55.72	49.1	48.3	33.15	24.97	11.41	10.52	19.7	21.99	14.1	22.08	25.41	48.25	57.5	61.31	48.35
26020	chr16	54983459	54984459	299278	Zpld1	27.67	24.16	-0.13	-0.09	27.67	9.79	8.04	10.24	24.16	33.53	22.54	26.93	9.51	9.33	10.52	8.76	5.5	9.87	8.59	9.53	12.59	17.38	31.27	23.82
14653	chr12	83017730	83018730	-79075	1700085C21Rik	7.92	10.16	-0.73	-0.41	7.92	6.6	6	6.08	10.16	13.17	6.44	4.14	8.32	6.22	5.26	7.66	3.3	7.05	9.81	4.24	4.2	9.36	14.1	7.01
5476	chr10	17366718	17367718	-271436	Gm20125	54.15	27.21	0.61	-0.98	54.15	31.81	31.4	18.84	27.21	50.3	42.4	69.74	54.71	20.74	19.99	29.56	40.68	23.97	19.62	20.12	16.78	27.41	27.59	26.63
13157	chr12	25272107	25273107	143433	Gm17746	40.81	22.54	0.5	-0.58	40.81	17.26	20.47	11.06	22.54	29.94	43.47	49.03	30.92	12.45	8.41	24.08	17.59	19.74	11.04	11.65	10.49	27.41	17.78	22.42
61278	chr8	61697700	61698700	61898	Palld	75.85	26.04	1.18	-3.07	75.85	19.22	13.32	9.13	26.04	81.44	51.52	94.6	27.35	14.52	15.78	9.85	13.19	16.92	7.36	11.65	8.39	16.71	31.27	30.13
5564	chr10	19441524	19442524	-44691	Gm33104	14.22	9.17	0.22	-0.11	14.22	4.71	5.64	3.28	9.17	11.98	13.42	17.26	4.76	7.26	2.1	3.28	6.6	7.05	2.45	5.29	2.1	12.7	9.2	5.61
47337	chr4	134102211	134103211	128	Ubxn11	40.2	24.21	0.37	-0.4	40.2	16.85	14.57	14.74	24.21	47.9	35.42	37.29	20.22	11.41	18.93	18.61	11	14.1	14.72	12.71	16.78	28.75	21.46	22.42
28079	chr17	34836361	34837361	42	Stk19	46.22	31.85	0.18	-0.17	46.22	31.28	30.29	26.48	31.85	58.68	41.32	38.67	41.62	25.93	26.3	37.22	29.69	23.97	25.76	18	35.67	30.75	31.88	32.93
61070	chr8	54152925	54153925	75893	Vegfc	8.67	9.94	-0.58	-0.33	8.67	7.62	7.26	4.9	9.94	9.58	5.37	11.05	7.14	5.19	10.52	9.85	7.7	4.23	7.36	1.06	6.29	6.69	9.81	13.31
36951	chr2	104298842	104299842	110992	D430041D05Rik	15.3	9.5	0.32	-0.17	15.3	9.15	7.52	8.53	9.5	16.77	13.95	15.19	10.7	6.22	10.52	9.85	9.9	2.82	9.81	5.29	10.49	4.68	14.72	9.11
60184	chr8	22432787	22433787	21947	Mrps31	29.82	23.06	-0.01	0	29.82	15.16	15.41	22.45	23.06	35.93	20.39	33.15	13.08	13.48	18.93	15.33	15.39	15.51	22.08	18	27.27	25.4	22.07	21.72
6806	chr10	67002878	67003878	-1697	Gm31763	57.96	51.73	-0.2	-0.25	57.96	25.4	26.59	22.01	51.73	62.27	46.69	64.91	33.3	15.56	27.35	24.08	27.49	28.2	19.62	27.53	18.88	49.47	54.57	51.15
457	chr1	23732276	23733276	-29150	B3gat2	19.14	12.3	0.26	-0.16	19.14	9.4	5.9	6.44	12.3	10.78	20.39	26.24	8.32	7.26	12.62	7.66	4.4	5.64	2.45	10.59	6.29	12.03	12.26	12.61
47549	chr4	139459678	139460678	-70370	Iffo2	19.46	9.06	0.74	-0.54	19.46	14.53	14.37	14.34	9.06	21.56	11.27	25.55	15.46	18.67	9.47	9.85	21.99	11.28	13.49	16.94	12.59	14.04	6.13	7.01
16941	chr13	45283851	45284851	-105391	Mylip	15.97	6.19	0.97	-0.69	15.97	13.5	5.8	8.13	6.19	13.17	16.1	18.64	15.46	15.56	9.47	5.47	7.7	4.23	8.59	7.41	8.39	10.7	3.68	4.2
38292	chr2	145934402	145935402	118	Cfap61	67.08	66.02	-0.34	-0.61	67.08	39.05	44.24	38.8	66.02	65.87	60.11	75.27	61.84	30.08	25.24	42.69	40.68	49.34	26.98	28.59	60.84	59.5	60.09	78.47
24102	chr15	92598486	92599486	1877	Pdzrn4	22.9	16.2	0.15	-0.09	22.9	6.99	9.15	4.32	16.2	13.17	27.91	27.62	9.51	7.26	4.21	5.47	12.1	9.87	9.81	1.06	2.1	14.71	22.69	11.21
14955	chr12	92947601	92948601	496722	4930559C10Rik	16.97	8.53	0.6	-0.39	16.97	4.48	4.34	3.69	8.53	22.75	10.2	17.95	7.14	1.04	5.26	2.19	6.6	4.23	3.68	3.18	4.2	10.7	8.58	6.31
3687	chr1	155742290	155743290	-763	Lhx4	39.64	36.3	-0.22	-0.23	39.64	23.89	17.23	22.94	36.3	41.92	39.71	37.29	30.92	19.71	21.04	20.8	15.39	15.51	31.89	22.23	14.69	32.09	45.99	30.83
31453	chr18	64939173	64940173	51917	Nedd4l	12.01	6.79	0.42	-0.22	12.01	9.67	7.21	10.77	6.79	13.17	11.81	11.05	15.46	9.33	4.21	7.66	5.5	8.46	4.91	12.71	14.69	8.02	6.74	5.61
19539	chr14	24530011	24531011	39758	Rps24	12.07	10.89	-0.18	-0.09	12.07	8.69	5.85	5.39	10.89	11.98	11.81	12.43	8.32	9.33	8.41	2.19	5.5	9.87	9.81	6.35	0	9.36	13.49	9.81
24602	chr16	5627134	5628134	-257159	Rbfox1	17.36	25.5	-0.93	-1.17	17.36	10.19	8.05	10.18	25.5	15.57	17.17	19.33	10.7	7.26	12.62	5.47	8.8	9.87	7.36	10.59	12.59	32.09	27.59	16.82
34936	chr2	28387061	28388061	-60380	Ppp1r26	24.79	7.3	1.4	-1.51	24.79	18.66	14.21	11.18	7.3	32.33	22	20.03	22.6	19.71	13.67	14.23	14.29	14.1	6.13	12.71	14.69	8.69	10.42	2.8
67763	chrX	121231950	121232950	-919224	H2afb3	39.24	38.89	-0.34	-0.42	39.24	9.62	9.97	4.74	38.89	40.72	34.88	42.12	14.27	9.33	5.26	12.04	6.6	11.28	3.68	4.24	6.29	43.46	36.79	36.43
47613	chr4	141444347	141445347	174	Zbtb17	29.43	28.39	-0.28	-0.26	29.43	15.04	12.43	23.02	28.39	27.54	33.81	26.93	19.03	13.48	12.62	13.14	14.29	9.87	19.62	15.88	33.57	26.74	32.5	25.92
12591	chr11	119248741	119249741	-18722	Gaa	51.93	21.33	0.89	-1.22	51.93	17.43	19.8	13.92	21.33	86.23	39.18	30.38	26.16	12.45	13.67	20.8	23.09	15.51	12.26	14.82	14.69	24.74	19.62	19.62
63915	chr9	29681927	29682927	-268975	Ntm	6.24	16.54	-1.71	-1.67	6.24	4.77	3.03	3.34	16.54	5.99	8.59	4.14	5.95	3.11	5.26	5.47	2.2	1.41	3.68	4.24	2.1	8.02	27.59	14.01
12387	chr11	115236290	115237290	30453	Grin2c	18.12	7.3	0.94	-0.71	18.12	15.91	10.35	16.31	7.3	25.15	16.1	13.12	23.79	17.63	6.31	8.76	11	11.28	18.4	11.65	18.88	8.69	10.42	2.8
14444	chr12	77510950	77511950	101309	Fut8	30.55	6.27	1.91	-2.69	30.55	6.06	5.75	5.38	6.27	40.72	19.86	31.07	3.57	8.3	6.31	4.38	4.4	8.46	2.45	5.29	8.39	6.02	8.58	4.2
45998	chr4	91080043	91081043	291512	Elavl2	25.3	8.64	1.19	-1.33	25.3	15.82	14.63	5.21	8.64	22.75	24.15	29	20.22	8.3	18.93	9.85	14.29	19.74	6.13	5.29	4.2	9.36	11.65	4.9
21965	chr15	3582878	3583878	-26	Ghr	87.85	76.86	-0.16	-0.24	87.85	48.17	54.54	49.06	76.86	99.4	72.99	91.15	71.36	33.19	39.97	50.35	58.28	54.98	50.29	42.35	54.55	66.19	99.94	64.46
4521	chr1	180255762	180256762	38	Psen2	68	78.07	-0.56	-1.45	68	28.65	32.8	33.84	78.07	68.26	66.01	69.74	36.87	24.89	24.19	30.65	29.69	38.07	40.47	21.18	39.86	81.56	74.19	78.47
14583	chr12	80598424	80599424	45187	Erh	10.48	26.05	-1.65	-2.57	10.48	7.89	8.2	11.46	26.05	13.17	8.59	9.67	14.27	4.15	5.26	13.14	4.4	7.05	4.91	10.59	18.88	24.74	18.39	35.03
15505	chr12	110879813	110880813	8832	Cinp	11.4	5.23	0.78	-0.43	11.4	10.2	10.08	19.3	5.23	15.57	9.66	8.98	10.7	6.22	13.67	7.66	9.9	12.69	29.44	15.88	12.59	3.34	6.74	5.61
17871	chr13	81008961	81009961	45387	9330111N05Rik	36.82	28.98	-0.02	-0.02	36.82	17.99	15.93	10.89	28.98	37.13	33.27	40.05	30.92	7.26	15.78	10.95	14.29	22.56	7.36	12.71	12.59	28.08	24.53	34.33
25565	chr16	38248273	38249273	46051	Nr1i2	25.29	20.26	-0.04	-0.02	25.29	14.21	8.62	15.27	20.26	31.14	24.69	20.03	15.46	12.45	14.73	12.04	11	2.82	18.4	14.82	12.59	22.06	8.58	30.13
32606	chr19	12915831	12916831	3976	Olfr1448	12.39	5.39	0.85	-0.48	12.39	5.41	3.87	5.08	5.39	7.19	13.42	16.57	4.76	7.26	4.21	4.38	4.4	2.82	3.68	3.18	8.39	4.68	3.07	8.41
31567	chr18	68156679	68157679	-70767	Ldlrad4	17.8	15.63	-0.16	-0.09	17.8	12.55	12.33	8.12	15.63	11.98	24.15	17.26	17.84	11.41	8.41	10.95	7.7	18.33	8.59	5.29	10.49	12.03	15.94	18.92
32274	chr19	4604012	4605012	10193	Pcx	12.28	11.5	-0.31	-0.17	12.28	11.97	9.77	10.23	11.5	11.98	14.49	10.36	20.22	6.22	9.47	13.14	7.7	8.46	15.94	8.47	6.29	12.7	9.2	12.61
30330	chr18	25121042	25122042	44423	Tpgs2	19.77	9.11	0.77	-0.62	19.77	23.1	12.22	8.01	9.11	17.96	17.17	24.17	28.54	17.63	23.14	15.33	14.29	7.05	6.13	7.41	10.49	9.36	11.65	6.31
21143	chr14	85964914	85965914	-280556	4930529K09Rik	36.13	19.45	0.52	-0.56	36.13	45.78	35.73	7.09	19.45	31.14	26.83	50.41	64.22	36.3	36.81	37.22	41.78	28.2	1.23	13.76	6.29	18.05	17.17	23.12
40710	chr3	54734791	54735791	73	Exosc8	82.14	96.34	-0.6	-1.79	82.14	42.44	47.52	42.11	96.34	99.4	67.62	79.41	59.46	36.3	31.56	52.54	40.68	49.34	36.79	39.18	50.35	105.63	84.61	98.79
64424	chr9	45984207	45985207	164	Pafah1b2	34.3	36.74	-0.45	-0.6	34.3	20.8	11.8	15.72	36.74	35.93	33.81	33.15	23.79	21.78	16.83	16.42	7.7	11.28	13.49	10.59	23.08	34.1	41.08	35.03
48037	chr4	154022158	154023158	3386	Smim1	31.6	9.51	1.39	-1.96	31.6	24.98	28.99	17.01	9.51	34.73	24.15	35.91	32.11	21.78	21.04	29.56	26.39	31.02	18.4	13.76	18.88	11.37	7.36	9.81
15067	chr12	98258714	98259714	245	Galc	84.92	98.41	-0.58	-1.78	84.92	37.91	38.86	35.51	98.41	73.05	86.41	95.29	58.27	19.71	35.76	49.26	36.29	31.02	23.3	37.06	46.16	95.6	108.53	91.09
5191	chr10	7182637	7183637	29100	Cnksr3	148.33	90.91	0.34	-0.85	148.33	102.65	88.69	59.35	90.91	180.84	109.48	154.68	153.42	80.9	73.63	90.86	83.57	91.64	66.23	67.76	44.06	87.58	91.97	93.19
17920	chr13	83079337	83080337	-381504	Mir3961	10.04	39.75	-2.34	-5.88	10.04	2.23	4.23	3.69	39.75	7.19	13.95	8.98	3.57	2.07	1.05	5.47	4.4	2.82	3.68	3.18	4.2	37.44	35.56	46.24
58471	chr7	105399745	105400745	-191	Fam160a2	248.19	208.2	-0.11	-0.27	248.19	180.99	170.34	168.02	208.2	295.8	185.69	263.09	253.31	119.27	170.4	166.39	172.63	172	183.97	129.17	190.91	196.55	206.63	221.41
33311	chr19	35298546	35299546	333650	Mir1950	10.85	23.31	-1.44	-2	10.85	6.65	7.63	6.67	23.31	10.78	10.73	11.05	9.51	5.19	5.26	9.85	8.8	4.23	7.36	6.35	6.29	19.39	19.01	31.53
4610	chr1	182489488	182490488	27622	Capn2	32.51	26.97	-0.1	-0.08	32.51	15.26	22.35	23.32	26.97	41.92	25.22	30.38	15.46	13.48	16.83	22.99	18.69	25.38	18.4	15.88	35.67	29.42	26.98	24.52
52059	chr5	150952387	150953387	280	Kl	55.68	35.46	0.31	-0.39	55.68	24.1	21.89	24.15	35.46	46.71	54.74	65.6	27.35	19.71	25.24	26.27	25.29	14.1	20.85	22.23	29.37	35.43	33.11	37.84
43129	chr3	137680653	137681653	57481	Ddit4l	13.2	28.34	-1.44	-2.06	13.2	4.38	6.32	5.85	28.34	5.99	12.88	20.72	4.76	3.11	5.26	2.19	5.5	11.28	4.91	6.35	6.29	16.71	31.88	36.43
11848	chr11	101009099	101010099	147	Atp6v0a1	39.97	45.78	-0.54	-0.91	39.97	18.41	19.75	24.95	45.78	39.52	37.57	42.81	24.97	16.59	13.67	18.61	20.89	19.74	15.94	19.06	39.86	41.45	49.66	46.24
6058	chr10	38319132	38320132	143858	4930591E09Rik	18.93	22.12	-0.61	-0.55	18.93	9.82	7.53	9.76	22.12	32.33	8.59	15.88	10.7	12.45	6.31	2.19	7.7	12.69	6.13	8.47	14.69	20.72	23.91	21.72
21627	chr14	110168318	110169318	586331	Slitrk6	32.5	12.44	1.01	-1.08	32.5	15.55	16.87	10.29	12.44	39.52	19.32	38.67	22.6	10.37	13.67	19.7	15.39	15.51	9.81	8.47	12.59	12.7	4.29	20.32
15199	chr12	102202602	102203602	74375	Slc24a4	26.26	9.54	1.14	-1.29	26.26	16.32	9.35	10.54	9.54	21.56	26.83	30.38	24.97	13.48	10.52	6.57	8.8	12.69	7.36	13.76	10.49	7.35	7.97	13.31
9352	chr11	19474487	19475487	409712	4933406G16Rik	12.9	8.76	0.15	-0.07	12.9	4.24	6.64	4.69	8.76	13.17	9.66	15.88	1.19	3.11	8.41	5.47	8.8	5.64	2.45	7.41	4.2	10.7	3.68	11.91
67383	chrX	75873597	75874597	477	Pls3	35.51	31	-0.17	-0.15	35.51	18.98	21.57	19.67	31	31.14	33.27	42.12	29.73	10.37	16.83	22.99	12.1	29.61	22.08	22.23	14.69	28.08	36.18	28.73
38343	chr2	147571226	147572226	-138967	A530006G24Rik	18.54	8.41	0.8	-0.61	18.54	6.66	9.35	3.87	8.41	11.98	18.78	24.86	9.51	4.15	6.31	7.66	7.7	12.69	7.36	4.24	0	10.7	6.13	8.41
46337	chr4	102255042	102256042	603	Pde4b	21.39	30.5	-0.85	-1.16	21.39	9.97	5.9	3.57	30.5	16.77	17.71	29.69	14.27	10.37	5.26	5.47	6.6	5.64	1.23	3.18	6.29	20.72	34.34	36.43
58796	chr7	116267747	116268747	-30471	Plekha7	42.5	20.25	0.71	-1.04	42.5	11.03	10.87	20.07	20.25	45.51	39.18	42.81	5.95	13.48	13.67	8.76	15.39	8.46	15.94	21.18	23.08	19.39	24.53	16.82
39769	chr3	17834402	17835402	39240	Mir124a-2	10.9	10.74	-0.31	-0.17	10.9	7.75	6.11	4.74	10.74	11.98	9.66	11.05	10.7	5.19	7.36	5.47	4.4	8.46	11.04	3.18	0	11.37	11.04	9.81
68216	chrX	159809177	159810177	-30791	Sh3kbp1	20.49	7.54	1.09	-0.92	20.49	10.12	9.72	8.78	7.54	10.78	23.08	27.62	17.84	6.22	6.31	8.76	7.7	12.69	7.36	10.59	8.39	5.35	11.65	5.61
39935	chr3	25807231	25808231	346255	Nlgn1	11.2	7.39	0.27	-0.12	11.2	7.4	5.54	2.17	7.39	17.96	8.05	7.6	10.7	5.19	6.31	4.38	6.6	5.64	1.23	3.18	2.1	5.35	9.81	7.01
25161	chr16	25334963	25335963	48646	Tprg	79.07	17.01	1.84	-6.3	79.07	28.19	41.83	20.39	17.01	91.02	58.5	87.7	51.14	16.59	16.83	48.16	40.68	36.66	22.08	30.7	8.39	18.72	14.1	18.22
3618	chr1	153749041	153750041	115	Rnasel	32.87	31.34	-0.28	-0.28	32.87	14.75	14.63	12.29	31.34	40.72	26.83	31.07	20.22	12.45	11.57	15.33	18.69	9.87	14.72	11.65	10.49	26.74	39.24	28.03
40885	chr3	60225440	60226440	144071	Sucnr1	17.22	5.8	1.27	-1.06	17.22	4.23	3.87	1.82	5.8	13.17	19.86	18.64	1.19	4.15	7.36	2.19	6.6	2.82	1.23	4.24	0	4.01	9.2	4.2
22759	chr15	38198509	38199509	-20194	Odf1	42.58	26.92	0.31	-0.31	42.58	14.01	15.88	10.53	26.92	38.32	39.71	49.72	19.03	9.33	13.67	15.33	15.39	16.92	7.36	9.53	14.69	14.71	33.11	32.93
39403	chr2	179109493	179110493	-304943	4930591A17Rik	19.25	7.24	1.12	-0.99	19.25	5.46	11.7	9.6	7.24	25.15	18.78	13.81	5.95	7.26	3.16	9.85	15.39	9.87	9.81	10.59	8.39	7.35	7.36	7.01
62964	chr8	120667731	120668731	6	Cox4i1	38.73	42.44	-0.49	-0.74	38.73	27.77	22.05	26.31	42.44	40.72	35.42	40.05	41.62	26.97	14.73	20.8	24.19	21.15	29.44	22.23	27.27	38.78	37.4	51.15
68388	chrX	169027560	169028560	-8551	Arhgap6	5.57	20.35	-2.28	-3.02	5.57	2.54	3.13	0.76	20.35	7.19	5.37	4.14	2.38	1.04	4.21	4.38	2.2	2.82	1.23	1.06	0	10.7	25.14	25.22
24282	chr15	97992606	97993606	11618	Col2a1	32.25	30.98	-0.28	-0.28	32.25	16.15	18.85	18.14	30.98	26.35	38.64	31.76	20.22	12.45	15.78	17.51	16.49	22.56	12.26	21.18	20.98	26.74	31.88	34.33
44456	chr4	31492614	31493614	-470993	Map3k7	14.91	20.83	-0.83	-0.9	14.91	4.78	4.08	6.78	20.83	17.96	10.2	16.57	5.95	2.07	6.31	0	6.6	5.64	2.45	5.29	12.59	19.39	22.07	21.02
23220	chr15	59373711	59374711	13	Nsmce2	31.06	26.93	-0.15	-0.12	31.06	16.72	20.21	21.28	26.93	25.15	34.88	33.15	26.16	13.48	10.52	21.89	17.59	21.15	12.26	18	33.57	28.08	28.2	24.52
59398	chr7	136451670	136452670	-102755	C230079O03Rik	15.85	4.27	1.5	-1.17	15.85	4.41	7.83	7.44	4.27	19.16	11.81	16.57	5.95	5.19	2.1	9.85	6.6	7.05	8.59	9.53	4.2	6.69	1.23	4.9
47597	chr4	141060028	141061028	17	Crocc	105.44	123.38	-0.59	-2.26	105.44	72.38	64.4	65.47	123.38	120.96	86.94	108.41	102.28	59.12	55.75	70.06	68.17	54.98	63.78	48.7	83.92	129.7	131.83	108.6
5410	chr10	13782312	13783312	86145	Aig1	51.25	66.38	-0.74	-1.79	51.25	14.14	9.82	6.72	66.38	44.31	39.71	69.74	22.6	11.41	8.41	8.76	6.6	14.1	8.59	5.29	6.29	60.84	61.93	76.37
25889	chr16	49723883	49724883	25089	Ift57	22.41	7.36	1.24	-1.22	22.41	8.8	12.75	6.56	7.36	20.36	17.17	29.69	10.7	6.22	9.47	10.95	13.19	14.1	4.91	8.47	6.29	5.35	5.52	11.21
39472	chr2	180501066	180502066	1590	Ntsr1	16.47	30.12	-1.24	-1.96	16.47	10.32	12.43	8.48	30.12	23.95	7.51	17.95	14.27	10.37	6.31	15.33	12.1	9.87	8.59	8.47	8.39	26.07	30.66	33.63
28677	chr17	56424975	56425975	-6566	Mir6977	63.45	51.53	-0.07	-0.07	63.45	24.64	21.05	33.89	51.53	53.89	61.18	75.27	32.11	18.67	23.14	26.27	24.19	12.69	33.11	39.18	29.37	50.81	43.53	60.26
19517	chr14	23714609	23715609	289096	Kcnma1	24.48	7.46	1.34	-1.51	24.48	6.8	6.26	5.73	7.46	22.75	27.91	22.79	13.08	2.07	5.26	9.85	3.3	5.64	2.45	6.35	8.39	10.03	6.74	5.61
66912	chrX	16656145	16657145	36947	Maoa	8.28	11.22	-0.8	-0.52	8.28	4.83	4.03	1.12	11.22	7.19	5.9	11.74	7.14	1.04	6.31	4.38	7.7	0	1.23	2.12	0	6.69	17.17	9.81
39454	chr2	180119299	180120299	433	Osbpl2	57.83	68.57	-0.61	-1.45	57.83	35.13	29.25	40.8	68.57	68.26	52.06	53.17	49.95	21.78	33.66	31.74	26.39	29.61	39.25	30.7	52.45	60.84	69.9	74.97
67555	chrX	99285302	99286302	149741	Efnb1	45.85	28.86	0.3	-0.34	45.85	21.87	16.04	20.04	28.86	41.92	39.71	55.93	32.11	12.45	21.04	16.42	17.59	14.1	23.3	11.65	25.18	32.09	30.66	23.82
51112	chr5	122320100	122321100	33595	Rad9b	17.24	5.1	1.39	-1.15	17.24	17.99	14.1	14.29	5.1	20.36	13.42	17.95	22.6	12.45	18.93	15.33	14.29	12.69	12.26	20.12	10.49	8.02	3.07	4.2
11523	chr11	91157130	91158130	352939	4930405D11Rik	10.63	2.84	1.63	-0.98	10.63	5.17	3.5	4.68	2.84	13.17	6.98	11.74	7.14	4.15	4.21	4.38	3.3	2.82	2.45	5.29	6.29	3.34	3.07	2.1
55747	chr6	141304896	141305896	-35157	Gm10400	41.61	17.69	0.83	-1.15	41.61	9.81	8.57	10.23	17.69	57.48	30.05	37.29	10.7	13.48	5.26	9.85	8.8	7.05	15.94	8.47	6.29	18.72	14.72	19.62
63663	chr9	20976287	20977287	6	S1pr2	40.94	49.09	-0.6	-1.02	40.94	26.55	23.19	26.19	49.09	45.51	38.64	38.67	36.87	24.89	17.88	19.7	23.09	26.79	26.98	22.23	29.37	55.49	58.86	32.93
28945	chr17	66411841	66412841	37409	Mtcl1	29.02	17.46	0.39	-0.33	29.02	11.11	19.07	20.19	17.46	37.13	25.76	24.17	16.65	11.41	5.26	12.04	19.79	25.38	18.4	21.18	20.98	20.06	19.01	13.31
31250	chr18	58482721	58483721	-73019	Slc27a6	21.68	8.55	1.03	-0.91	21.68	6.55	12.7	16.31	8.55	31.14	16.64	17.26	7.14	8.3	4.21	8.76	11	18.33	18.4	13.76	16.78	4.01	10.42	11.21
36349	chr2	77790016	77791016	26300	Zfp385b	27.55	14.08	0.61	-0.56	27.55	8.75	15.04	11.24	14.08	35.93	17.71	29	9.51	6.22	10.52	20.8	8.8	15.51	7.36	13.76	12.59	16.05	17.78	8.41
55626	chr6	137440159	137441159	29938	Ptpro	29.28	14.86	0.63	-0.59	29.28	7.34	5.17	9.43	14.86	21.56	24.15	42.12	9.51	7.26	5.26	4.38	5.5	5.64	13.49	10.59	4.2	9.36	13.49	21.72
23604	chr15	76463292	76464292	6354	Scx	29.14	16.9	0.43	-0.4	29.14	28.07	26.7	20.78	16.9	34.73	25.76	26.93	39.25	19.71	25.24	19.7	30.79	29.61	15.94	25.41	20.98	16.71	17.17	16.82
41209	chr3	73707636	73708636	279	Bche	94.72	50.67	0.54	-1.25	94.72	58.55	43.83	34.07	50.67	102.99	71.38	109.79	95.14	33.19	47.33	39.41	48.38	43.7	44.15	39.18	18.88	48.14	57.64	46.24
64157	chr9	37139198	37140198	7624	Pknox2	46.35	19.95	0.89	-1.46	46.35	21.69	21.48	30.7	19.95	58.68	37.57	42.81	28.54	19.71	16.83	16.42	29.69	18.33	40.47	24.35	27.27	17.38	21.46	21.02
19949	chr14	43250389	43251389	96922	1700001F09Rik	28.1	13.67	0.68	-0.7	28.1	9.92	12.75	17.61	13.67	25.15	22.54	36.6	13.08	10.37	6.31	10.95	13.19	14.1	23.3	16.94	12.59	14.04	12.26	14.71
24223	chr15	96470666	96471666	-10323	Scaf11	17.44	5.52	1.34	-1.14	17.44	5.51	6.37	6.84	5.52	11.98	18.25	22.1	7.14	5.19	4.21	7.66	4.4	7.05	3.68	6.35	10.49	5.35	4.91	6.31
30955	chr18	49009289	49010289	-513500	1700044K03Rik	11.49	12.81	-0.51	-0.3	11.49	4.13	2.56	4.98	12.81	4.79	14.49	15.19	7.14	1.04	4.21	3.28	4.4	0	8.59	4.24	2.1	9.36	12.26	16.82
64640	chr9	53974466	53975466	335	Elmod1	41.25	27	0.25	-0.24	41.25	18.37	18.28	18.48	27	32.33	42.4	49.03	23.79	16.59	14.73	17.51	17.59	19.74	12.26	18	25.18	24.07	28.2	28.73
12557	chr11	118401487	118402487	-28	Lgals3bp	22.04	22.45	-0.35	-0.29	22.04	23.13	18.8	14.28	22.45	27.54	22	16.57	29.73	20.74	18.93	24.08	15.39	16.92	12.26	18	12.59	20.06	17.17	30.13
27315	chr17	8800646	8801646	-599	Pde10a	49.71	63.37	-0.69	-1.65	49.71	26.41	31.85	30.12	63.37	47.9	51.52	49.72	41.62	18.67	18.93	43.79	26.39	25.38	35.57	27.53	27.27	52.15	69.29	68.67
15559	chr12	112012692	112013692	-32441	Rd3l	26.33	13.83	0.53	-0.45	26.33	9.03	8.19	8.95	13.83	19.16	27.37	32.45	8.32	11.41	7.36	14.23	3.3	7.05	11.04	9.53	6.29	18.72	12.26	10.51
29236	chr17	75551327	75552327	119	Fam98a	150.01	132.46	-0.18	-0.42	150.01	92.63	84.2	81.06	132.46	172.45	122.9	154.68	128.44	68.45	80.99	76.63	75.87	100.1	89.53	55.06	98.6	140.39	123.86	133.13
50086	chr5	87333289	87334289	3406	Ugt2a3	15.2	8.77	0.45	-0.27	15.2	6.5	3.97	4.38	8.77	16.77	10.2	18.64	5.95	8.3	5.26	3.28	4.4	4.23	3.68	3.18	6.29	8.69	9.2	8.41
41922	chr3	96727061	96728061	-50	Rnf115	51.08	61.04	-0.6	-1.19	51.08	50.66	28	36.06	61.04	46.71	54.74	51.79	64.22	42.52	45.23	30.65	30.79	22.56	35.57	24.35	48.25	42.79	67.45	72.87
2307	chr1	91321484	91322484	-91	Espnl	19.63	12.37	0.31	-0.19	19.63	11.1	10.56	17.32	12.37	19.16	20.39	19.33	7.14	10.37	15.78	6.57	11	14.1	17.17	18	16.78	8.02	17.17	11.91
25337	chr16	31003469	31004469	77463	Xxylt1	12.38	29.76	-1.61	-2.73	12.38	9.53	9.03	7.62	29.76	5.99	16.64	14.5	11.89	9.33	7.36	12.04	6.6	8.46	4.91	11.65	6.29	30.08	26.98	32.23
23905	chr15	84687449	84688449	6951	Prr5	30.01	8.19	1.49	-2.02	30.01	33.22	32.27	24.58	8.19	31.14	30.59	28.31	46.38	26.97	26.3	33.93	21.99	40.88	22.08	26.47	25.18	12.03	5.52	7.01
47929	chr4	151288718	151289718	199648	Gm13090	11.35	13.95	-0.61	-0.44	11.35	13.14	11.28	7.85	13.95	9.58	13.42	11.05	15.46	15.56	8.41	9.85	9.9	14.1	9.81	9.53	4.2	11.37	17.17	13.31
9200	chr11	12291072	12292072	120568	Cobl	19.08	22.09	-0.61	-0.61	19.08	8.4	9.04	9.64	22.09	17.96	12.34	26.93	9.51	6.22	9.47	8.76	9.9	8.46	11.04	5.29	12.59	20.72	24.53	21.02
43317	chr3	143411444	143412444	168889	A830019L24Rik	14.89	20.16	-0.8	-0.78	14.89	4.67	2.66	1.93	20.16	14.37	17.17	13.12	3.57	5.19	5.26	4.38	2.2	1.41	3.68	0	2.1	28.08	18.39	14.01
37982	chr2	136679517	136680517	-33433	Snap25	67.07	40.12	0.39	-0.53	67.07	69.54	55.12	71.33	40.12	73.05	56.35	71.81	109.41	49.78	49.44	43.79	63.78	57.8	68.68	59.29	86.02	43.46	55.18	21.72
48857	chr5	32728491	32729491	17351	Pisd	15.32	15.61	-0.38	-0.27	15.32	7.54	8.83	10.12	15.61	17.96	15.56	12.43	14.27	5.19	3.16	12.04	8.8	5.64	6.13	11.65	12.59	16.71	14.72	15.41
46508	chr4	107178024	107179024	-106	Tmem59	90.95	93.92	-0.41	-1.09	90.95	87.19	59.77	58.35	93.92	98.2	77.28	97.36	122.49	58.08	80.99	53.64	69.27	56.39	53.96	47.65	73.43	89.59	91.97	100.2
36327	chr2	77143230	77144230	26905	Ccdc141	14.79	20.84	-0.87	-0.98	14.79	5.81	3.97	5.5	20.84	13.17	13.95	17.26	5.95	7.26	4.21	4.38	3.3	4.23	4.91	5.29	6.29	16.71	22.69	23.12
11210	chr11	81777794	81778794	-82383	5530401A14Rik	11.72	3.5	1.35	-0.71	11.72	20.68	7.06	4.1	3.5	10.78	11.27	13.12	20.22	18.67	23.14	7.66	12.1	1.41	4.91	5.29	2.1	0	9.81	0.7
37665	chr2	127718660	127719660	10737	Mall	13.01	4.45	1.13	-0.74	13.01	6.4	6.63	10.17	4.45	15.57	14.49	8.98	3.57	11.41	4.21	7.66	6.6	5.64	14.72	7.41	8.39	4.68	3.07	5.61
13505	chr12	36426321	36427321	11205	Mir3472	19.36	30.35	-1.02	-1.58	19.36	13.55	11.18	9.13	30.35	21.56	12.34	24.17	16.65	14.52	9.47	12.04	8.8	12.69	14.72	8.47	4.2	28.08	34.95	28.03
8312	chr10	113194361	113195361	-265835	Atxn7l3b	20.82	9.72	0.75	-0.63	20.82	5.97	6.84	3.59	9.72	22.75	20.39	19.33	9.51	1.04	7.36	6.57	5.5	8.46	1.23	9.53	0	7.35	14.1	7.71
28255	chr17	43503907	43504907	-1634	Mep1a	42.58	19.91	0.72	-1.04	42.58	8.98	13.01	8.95	19.91	39.52	34.35	53.86	15.46	6.22	5.26	14.23	12.1	12.69	3.68	10.59	12.59	22.06	20.85	16.82
14073	chr12	65062074	65063074	11364	Fkbp3	19.13	5.89	1.28	-0.96	19.13	3.47	4.44	2.34	5.89	21.56	7.51	28.31	8.32	1.04	1.05	4.38	3.3	5.64	4.91	2.12	0	9.36	0.61	7.71
48319	chr5	12127160	12128160	209617	4933402N22Rik	8.28	26.87	-2.02	-3.24	8.28	2.89	2.04	2.92	26.87	9.58	6.98	8.29	2.38	2.07	4.21	1.09	2.2	2.82	2.45	2.12	4.2	14.04	39.24	27.33
34515	chr2	13233591	13234591	37324	Rsu1	95.38	23.85	1.62	-6.28	95.38	57.38	70.06	47.02	23.85	104.19	68.69	113.25	84.44	45.63	42.07	53.64	74.77	81.77	50.29	59.29	31.47	27.41	24.53	19.62
3487	chr1	150593260	150594260	-127595	Prg4	12.71	16.74	-0.78	-0.72	12.71	9.19	9.14	5.62	16.74	11.98	12.34	13.81	11.89	6.22	9.47	10.95	6.6	9.87	7.36	7.41	2.1	14.04	16.55	19.62
12572	chr11	118874946	118875946	34126	Rbfox3	9.79	5.62	0.46	-0.21	9.79	7.62	3.76	9.64	5.62	9.58	8.05	11.74	7.14	5.19	10.52	5.47	4.4	1.41	11.04	5.29	12.59	4.68	7.97	4.2
24819	chr16	14158955	14159955	-171	Mir484	89.02	84.01	-0.27	-0.44	89.02	41.36	33.11	36.62	84.01	124.55	66.55	75.96	49.95	38.37	35.76	41.6	25.29	32.43	25.76	19.06	65.04	92.26	88.29	71.47
67665	chrX	105120559	105121559	681	Magee1	38.86	38.09	-0.31	-0.37	38.86	39.3	30.41	27.79	38.09	43.11	32.74	40.74	66.6	17.63	33.66	19.7	36.29	35.25	38.02	26.47	18.88	33.43	37.4	43.44
34777	chr2	23899154	23900154	149725	Hnmt	14.21	17.21	-0.6	-0.46	14.21	3.77	4.23	5.78	17.21	13.17	12.88	16.57	7.14	2.07	2.1	7.66	2.2	2.82	3.68	3.18	10.49	8.02	23.3	20.32
6033	chr10	37337006	37338006	-198580	Marcks	7.02	11.34	-1.07	-0.76	7.02	21.88	16.87	21.18	11.34	4.79	5.9	10.36	33.3	18.67	13.67	19.7	15.39	15.51	24.53	22.23	16.78	14.04	7.36	12.61
33121	chr19	29877386	29878386	-47227	Il33	90.71	17.86	1.96	-7.69	90.71	36.82	34.21	7.73	17.86	105.39	63.86	102.89	57.08	18.67	34.71	38.31	31.89	32.43	14.72	8.47	0	16.71	16.55	20.32
42574	chr3	121417814	121418814	-8227	Cnn3	11.37	11.7	-0.33	-0.18	11.37	10.19	5.91	10.58	11.7	9.58	15.56	8.98	10.7	8.3	11.57	4.38	7.7	5.64	8.59	8.47	14.69	13.37	14.72	7.01
38841	chr2	163252916	163253916	27962	Tox2	14.4	4	1.6	-1.21	14.4	4.12	8.41	11.35	4	11.98	13.95	17.26	7.14	3.11	2.1	7.66	7.7	9.87	9.81	11.65	12.59	5.35	2.45	4.2
27892	chr17	29450807	29451807	-39738	Pim1	15.76	38.55	-1.65	-3.76	15.76	6.94	8.93	7.48	38.55	10.78	17.17	19.33	8.32	8.3	4.21	13.14	6.6	7.05	9.81	6.35	6.29	34.1	37.4	44.14
53089	chr6	42509013	42510013	-22299	Olfr456	38.15	22.66	0.4	-0.44	38.15	12.19	6.74	9.54	22.66	33.53	38.1	42.81	16.65	5.19	14.73	4.38	8.8	7.05	8.59	11.65	8.39	21.39	26.98	19.62
52716	chr6	29735671	29736671	674	Smo	56.24	52.7	-0.27	-0.36	56.24	28.04	22.26	28.13	52.7	71.86	49.91	46.96	47.57	17.63	18.93	17.51	25.29	23.97	23.3	25.41	35.67	52.82	57.64	47.65
28262	chr17	43615283	43616283	14516	Tdrd6	18.06	7.15	0.96	-0.77	18.06	6.9	9.14	3.51	7.15	11.98	16.64	25.55	7.14	8.3	5.26	10.95	6.6	9.87	7.36	1.06	2.1	6.02	9.81	5.61
68188	chrX	158703440	158704440	-551842	Rps6ka3	30.32	13.28	0.83	-0.94	30.32	9.44	9.77	19.65	13.28	21.56	30.05	39.36	9.51	8.3	10.52	12.04	8.8	8.46	14.72	19.06	25.18	11.37	16.55	11.91
6137	chr10	40638975	40639975	9464	Ddo	56.12	17.35	1.35	-2.79	56.12	43.11	38.98	29.84	17.35	71.86	48.84	47.65	58.27	33.19	37.87	37.22	47.28	32.43	29.44	32.82	27.27	8.69	20.23	23.12
65125	chr9	70542760	70543760	545	Sltm	49.51	58.88	-0.59	-1.13	49.51	22.48	18.19	20.94	58.88	35.93	60.11	52.48	30.92	21.78	14.73	13.14	23.09	18.33	19.62	20.12	23.08	51.48	60.7	64.46
25063	chr16	22551356	22552356	-19672	Mir8095	5.3	25.49	-2.62	-4.26	5.3	4.38	6.05	7.07	25.49	2.4	5.9	7.6	4.76	3.11	5.26	12.04	3.3	2.82	8.59	4.24	8.39	23.4	35.56	17.52
25037	chr16	21643817	21644817	50348	2510009E07Rik	38.7	34.9	-0.22	-0.23	38.7	40.39	36.61	13.22	34.9	40.72	33.27	42.12	59.46	24.89	36.81	31.74	32.99	45.11	19.62	13.76	6.29	39.44	33.72	31.53
37610	chr2	126034155	126035155	-3	Fgf7	44.93	21.99	0.63	-0.89	44.93	15.69	14.89	10.06	21.99	47.9	36.49	50.41	17.84	15.56	13.67	10.95	15.39	18.33	12.26	9.53	8.39	26.74	19.62	19.62
27196	chr17	5168884	5169884	174310	Arid1b	19.4	4.77	1.71	-1.61	19.4	4.47	8.05	11.16	4.77	16.77	19.32	22.1	7.14	2.07	4.21	4.38	9.9	9.87	13.49	5.29	14.69	1.34	7.36	5.61
45128	chr4	56989442	56990442	449	Frrs1l	15.86	8.72	0.55	-0.35	15.86	7.94	3.34	8.08	8.72	10.78	20.93	15.88	7.14	10.37	6.31	3.28	1.1	5.64	7.36	10.59	6.29	8.02	10.42	7.71
22473	chr15	27536484	27537484	-34510	Mir7117	7.6	19.9	-1.74	-2.34	7.6	19.96	18.28	12.63	19.9	8.38	7.51	6.91	28.54	14.52	16.83	20.8	14.29	19.74	14.72	8.47	14.69	18.72	22.07	18.92
10030	chr11	43821366	43822366	14623	Adra1b	17.95	8.64	0.68	-0.48	17.95	7.46	6.58	3.34	8.64	23.95	11.27	18.64	3.57	9.33	9.47	4.38	5.5	9.87	3.68	4.24	2.1	5.35	7.97	12.61
16725	chr13	38296094	38297094	-49122	Bmp6	24.29	30.26	-0.67	-0.87	24.29	17.61	12.8	13.87	30.26	31.14	23.08	18.64	21.41	10.37	21.04	15.33	13.19	9.87	11.04	15.88	14.69	34.1	30.04	26.63
8594	chr10	121808925	121809925	69495	BC048403	5.29	23.12	-2.47	-3.93	5.29	5.55	4.86	2.7	23.12	3.59	5.37	6.91	8.32	6.22	2.1	4.38	8.8	1.41	4.91	3.18	0	18.72	23.3	27.33
63508	chr9	14247517	14248517	-28284	Sesn3	18.04	48.71	-1.79	-5.35	18.04	9.48	7.73	6.49	48.71	19.16	17.71	17.26	10.7	10.37	7.36	9.85	7.7	5.64	11.04	4.24	4.2	41.45	57.02	47.65
42984	chr3	132628551	132629551	-1140	Gimd1	11.83	10.69	-0.16	-0.07	11.83	2.1	4.44	1.82	10.69	10.78	15.03	9.67	0	1.04	5.26	3.28	4.4	5.64	1.23	4.24	0	5.35	14.1	12.61
9821	chr11	35178071	35179071	57115	Slit3	28.4	6.2	1.8	-2.4	28.4	12.37	14.42	15.09	6.2	34.73	26.3	24.17	13.08	11.41	12.62	15.33	20.89	7.05	14.72	13.76	16.78	8.69	4.29	5.61
67627	chrX	102361861	102362861	109710	Gm14858	17.55	14.36	-0.05	-0.03	17.55	12.71	14.42	10.01	14.36	20.36	15.03	17.26	21.41	7.26	9.47	12.04	14.29	16.92	11.04	10.59	8.39	11.37	13.49	18.22
11836	chr11	100711783	100712783	184	Kat2a	21.71	30.35	-0.84	-1.22	21.71	15.22	18.75	12	30.35	27.54	18.25	19.33	14.27	11.41	19.99	17.51	17.59	21.15	8.59	14.82	12.59	28.08	30.04	32.93
38570	chr2	154300272	154301272	-6472	Bpifb9b	11.37	7.15	0.34	-0.15	11.37	7.95	6.37	8.42	7.15	9.58	5.9	18.64	7.14	8.3	8.41	6.57	5.5	7.05	14.72	4.24	6.29	7.35	4.29	9.81
3611	chr1	153598931	153599931	-49717	Npl	40.21	20.44	0.61	-0.79	40.21	21.4	16.09	12.45	20.44	34.73	37.57	48.34	29.73	16.59	17.88	15.33	13.19	19.74	18.4	8.47	10.49	18.05	25.75	17.52
52455	chr6	17748713	17749713	43	St7	80.12	46.59	0.42	-0.8	80.12	36.13	38.91	31.01	46.59	87.42	73.52	79.41	58.27	24.89	25.24	47.07	32.99	36.66	39.25	28.59	25.18	40.78	47.83	51.15
29645	chr17	87892706	87893706	-81844	Msh6	14.97	5.25	1.16	-0.83	14.97	8.98	6.63	8.94	5.25	10.78	18.25	15.88	15.46	6.22	5.26	10.95	3.3	5.64	11.04	5.29	10.49	2.01	6.74	7.01
11386	chr11	88086633	88087633	-10925	2210416O15Rik	23.88	24.88	-0.4	-0.36	23.88	16.23	13.84	13.34	24.88	21.56	30.05	20.03	22.6	15.56	10.52	17.51	9.9	14.1	14.72	14.82	10.49	30.75	26.37	17.52
10507	chr11	59921010	59922010	11	1810063I02Rik	61.84	74.57	-0.63	-1.7	61.84	14.1	15.99	12.33	74.57	65.87	49.91	69.74	21.41	10.37	10.52	18.61	20.89	8.46	8.59	7.41	20.98	72.87	82.16	68.67
17841	chr13	79309289	79310289	-1110916	Nr2f1	44.67	13.21	1.38	-2.48	44.67	12.06	12.81	6.31	13.21	49.1	38.64	46.27	22.6	7.26	6.31	8.76	19.79	9.87	7.36	3.18	8.39	15.38	6.74	17.52
25951	chr16	51196865	51197865	413956	1700116B05Rik	35.11	8	1.76	-2.77	35.11	32.48	27.89	8.72	8	35.93	25.22	44.19	53.52	17.63	26.3	18.61	24.19	40.88	13.49	8.47	4.2	5.35	6.74	11.91
35398	chr2	44999633	45000633	23044	Mir5129	13.59	12.66	-0.26	-0.14	13.59	4.37	5.44	2.92	12.66	16.77	10.2	13.81	4.76	5.19	3.16	4.38	7.7	4.23	2.45	2.12	4.2	13.37	14.1	10.51
25669	chr16	42123451	42124451	179518	Mir6540	16.88	8.35	0.67	-0.48	16.88	10.17	8.46	5.68	8.35	15.57	15.03	20.03	10.7	12.45	7.36	12.04	7.7	5.64	8.59	4.24	4.2	7.35	8.58	9.11
9627	chr11	29763829	29764829	45766	Rtn4	28.36	7.04	1.62	-1.88	28.36	9.05	8.83	7.21	7.04	29.94	12.34	42.81	8.32	8.3	10.52	12.04	8.8	5.64	3.68	13.76	4.2	8.69	6.13	6.31
30117	chr18	15660292	15661292	57254	Chst9	15.72	16.22	-0.38	-0.22	15.72	7.76	7.21	5.73	16.22	25.15	12.34	9.67	10.7	3.11	9.47	5.47	7.7	8.46	9.81	3.18	4.2	6.02	20.23	22.42
53071	chr6	42190894	42191894	-23934	Tas2r144	10.08	28.01	-1.83	-3.09	10.08	6.69	5.07	6.08	28.01	4.79	7.51	17.95	10.7	6.22	3.16	4.38	6.6	4.23	2.45	5.29	10.49	26.74	30.66	26.63
45565	chr4	73488668	73489668	-84096	Gm11487	90.02	82.1	-0.23	-0.39	90.02	33.97	39.07	13.99	82.1	77.84	81.04	111.17	47.57	23.85	30.5	39.41	34.09	43.7	13.49	15.88	12.59	65.52	88.29	92.49
48356	chr5	13399000	13400000	191	Sema3a	64.38	51.23	-0.03	-0.02	64.38	25.67	21.88	23.22	51.23	64.67	45.62	82.86	40.44	17.63	18.93	21.89	19.79	23.97	23.3	23.29	23.08	49.47	60.09	44.14
25712	chr16	43363539	43364539	56157	Gm15713	52.98	40.61	0.02	-0.01	52.98	26.22	23.92	16.96	40.61	67.06	40.79	51.1	36.87	20.74	21.04	32.84	21.99	16.92	24.53	11.65	14.69	34.76	38.01	49.05
38662	chr2	157006332	157007332	243	Dsn1	35.05	51.55	-0.9	-1.96	35.05	23.3	22	23.15	51.55	27.54	42.4	35.22	33.3	15.56	21.04	21.89	28.59	15.51	14.72	19.06	35.67	46.13	59.47	49.05
2500	chr1	102687363	102688363	1532095	Gm20268	29.29	7	1.67	-1.93	29.29	7.95	8.36	8.48	7	26.35	11.81	49.72	7.14	8.3	8.41	1.09	9.9	14.1	8.59	8.47	8.39	8.02	7.36	5.61
351	chr1	19673937	19674937	462383	Tfap2b	25.64	16.8	0.26	-0.19	25.64	11.67	12.28	5.73	16.8	19.16	22.54	35.22	21.41	5.19	8.41	12.04	12.1	12.69	9.81	5.29	2.1	14.04	20.23	16.12
8691	chr10	124165695	124166695	-302879	4930503E24Rik	10.46	21.85	-1.43	-1.5	10.46	5.74	2.66	1.47	21.85	2.4	9.66	19.33	3.57	2.07	11.57	3.28	3.3	1.41	1.23	3.18	0	16.05	31.27	18.22
40456	chr3	42908034	42909034	1165916	D3Ertd751e	29.96	13.49	0.77	-0.86	29.96	4.37	7.26	3.4	13.49	28.74	25.22	35.91	4.76	4.15	4.21	3.28	4.4	14.1	4.91	5.29	0	14.71	15.94	9.81
21027	chr14	78972274	78973274	123596	Vwa8	36.04	8.84	1.68	-2.77	36.04	13.93	12.85	6.09	8.84	32.33	29.52	46.27	16.65	6.22	18.93	12.04	11	15.51	9.81	6.35	2.1	11.37	6.74	8.41
64148	chr9	37053648	37054648	93174	Pknox2	41.48	59.99	-0.89	-2.15	41.48	20.38	14.11	16.05	59.99	29.94	41.32	53.17	21.41	16.59	23.14	10.95	18.69	12.69	13.49	5.29	29.37	48.14	63.15	68.67
57898	chr7	83076885	83077885	-71085	A530021J07Rik	19.8	24.72	-0.69	-0.78	19.8	14.4	21.32	9.99	24.72	20.36	20.39	18.64	20.22	11.41	11.57	16.42	26.39	21.15	11.04	6.35	12.59	18.72	33.72	21.72
38413	chr2	150310905	150311905	51360	3300002I08Rik	80.04	76.28	-0.31	-0.58	80.04	59.05	52.81	49.41	76.28	85.03	56.35	98.74	90.38	38.37	48.39	58.02	53.88	46.52	65	37.06	46.16	69.53	76.64	82.68
24834	chr16	14894321	14895321	-11825	Efcab1	9.74	27.88	-1.82	-3.29	9.74	7.35	4.81	4.68	27.88	9.58	8.59	11.05	9.51	5.19	7.36	3.28	5.5	5.64	2.45	5.29	6.29	24.07	34.34	25.22
13254	chr12	28799824	28800824	48496	Eipr1	12.68	5.49	0.81	-0.47	12.68	14.44	6.16	4.92	5.49	19.16	11.27	7.6	13.08	18.67	11.57	8.76	5.5	4.23	7.36	5.29	2.1	5.35	5.52	5.61
33350	chr19	36789567	36790567	-44165	Tnks2	73.24	60.34	-0.08	-0.09	73.24	35.33	36.82	32.77	60.34	91.02	56.89	71.81	55.9	28	22.09	42.69	39.58	28.2	39.25	33.88	25.18	53.48	68.67	58.86
57973	chr7	86211068	86212068	34633	Vmn2r76	16.84	18.39	-0.51	-0.43	16.84	8.84	13.01	11.17	18.39	16.77	12.34	21.41	11.89	6.22	8.41	12.04	14.29	12.69	6.13	10.59	16.78	16.71	20.23	18.22
62514	chr8	106798028	106799028	-71714	Has3	14.19	3.75	1.6	-1.15	14.19	4.8	5.28	4.92	3.75	9.58	15.03	17.95	7.14	6.22	1.05	4.38	4.4	7.05	7.36	5.29	2.1	6.69	2.45	2.1
28102	chr17	35241264	35242264	18	Ddx39b	55.84	79.24	-0.87	-2.9	55.84	43.6	32.65	29.64	79.24	49.1	54.2	64.22	70.17	25.93	34.71	37.22	39.58	21.15	33.11	22.23	33.57	72.87	82.16	82.68
8322	chr10	114735519	114736519	65351	Trhde	32.13	25.04	0.01	-0.01	32.13	8.9	9.98	6.38	25.04	28.74	28.98	38.67	4.76	9.33	12.62	5.47	13.19	11.28	1.23	7.41	10.49	20.72	26.37	28.03
18081	chr13	91460268	91461268	-329	Ssbp2	123.55	126.78	-0.41	-1.32	123.55	85.76	77.9	75.64	126.78	122.15	101.43	147.08	122.49	63.27	71.53	73.34	91.27	69.08	65	42.35	119.58	117.66	128.15	134.53
36345	chr2	77746053	77747053	-43281	Zfp385b	33.38	6.73	1.95	-2.83	33.38	7.1	6.53	4.92	6.73	45.51	21.47	33.15	11.89	5.19	4.21	7.66	7.7	4.23	7.36	5.29	2.1	10.03	7.36	2.8
46929	chr4	122815706	122816706	-20021	Ppt1	15.32	2.63	2.35	-1.89	15.32	24.63	17.86	2.87	2.63	21.56	11.27	13.12	32.11	20.74	21.04	14.23	15.39	23.97	1.23	5.29	2.1	3.34	2.45	2.1
37572	chr2	125135617	125136617	-575	Ctxn2	23.31	16.07	0.15	-0.09	23.31	12.87	13.22	10.82	16.07	22.75	11.27	35.91	16.65	9.33	12.62	13.14	11	15.51	6.13	11.65	14.69	16.05	15.33	16.82
36981	chr2	105126043	105127043	14	Wt1	91.23	75.42	-0.08	-0.11	91.23	49.99	52.67	43.17	75.42	94.61	81.04	98.05	82.06	32.15	35.76	48.16	70.37	39.47	51.51	40.23	37.76	68.86	75.42	81.98
61710	chr8	78170312	78171312	-42530	Ttc29	40.83	4.9	2.67	-5	40.83	16.13	17.82	11.71	4.9	49.1	35.42	37.98	28.54	9.33	10.52	15.33	19.79	18.33	9.81	16.94	8.39	2.01	9.2	3.5
41356	chr3	81069545	81070545	33629	Pdgfc	12.22	10.27	-0.1	-0.04	12.22	4.38	3.13	1.05	10.27	15.57	10.73	10.36	4.76	2.07	6.31	3.28	3.3	2.82	0	1.06	2.1	9.36	11.65	9.81
38773	chr2	160432945	160433945	-66380	Mafb	9.27	14.12	-0.97	-0.75	9.27	11.9	11.12	10.3	14.12	4.79	6.44	16.57	19.03	10.37	6.31	16.42	9.9	7.05	17.17	9.53	4.2	13.37	12.88	16.12
51847	chr5	145203878	145204878	-181	Zkscan5	113.44	118.03	-0.42	-1.26	113.44	104.73	99.88	80.46	118.03	136.52	86.41	117.39	160.55	68.45	85.2	99.61	105.56	94.46	83.4	69.88	88.11	117	125.69	111.41
61119	chr8	56451145	56452145	33323	4930518J21Rik	7.15	19.62	-1.79	-2.33	7.15	4.03	5.17	2.53	19.62	4.79	6.98	9.67	4.76	3.11	4.21	4.38	5.5	5.64	1.23	6.35	0	23.4	16.55	18.92
59960	chr8	12628806	12629806	42794	Tubgcp3	11.55	9.93	-0.19	-0.09	11.55	10.63	9.2	8.89	9.93	16.77	7.51	10.36	13.08	8.3	10.52	3.28	8.8	15.51	9.81	8.47	8.39	10.7	8.58	10.51
34234	chr2	4651520	4652520	115	Prpf18	44.47	32.04	0.12	-0.11	44.47	23.28	26.53	22.26	32.04	47.9	46.15	39.36	33.3	19.71	16.83	29.56	17.59	32.43	18.4	14.82	33.57	26.74	39.24	30.13
16782	chr13	40585019	40586019	-142289	Gm26688	8.21	17.07	-1.46	-1.6	8.21	5.41	6.16	6.02	17.07	8.38	5.9	10.36	4.76	6.22	5.26	7.66	6.6	4.23	1.23	4.24	12.59	16.71	13.49	21.02
2461	chr1	98047348	98048348	-55	B230216N24Rik	33.83	19.05	0.43	-0.37	33.83	21.27	13.22	25.01	19.05	43.11	15.56	42.81	26.16	15.56	22.09	16.42	17.59	5.64	24.53	16.94	33.57	22.73	23.91	10.51
6880	chr10	68735481	68736481	12235	Tmem26	11.14	6.73	0.34	-0.15	11.14	3.63	9.45	9.36	6.73	13.17	6.44	13.81	3.57	3.11	4.21	8.76	5.5	14.1	12.26	9.53	6.29	4.68	4.29	11.21
42326	chr3	108911003	108912003	226	Prpf38b	104.73	87.04	-0.09	-0.12	104.73	68.87	57.32	47.13	87.04	119.76	94.99	99.44	101.09	50.82	54.7	42.69	71.47	57.8	47.83	22.23	71.33	63.51	107.91	89.69
22857	chr15	41830359	41831359	-99	Oxr1	69.81	76.83	-0.5	-1.17	69.81	50.15	40.9	28.26	76.83	76.65	59.57	73.2	68.98	39.41	42.07	36.12	42.88	43.7	25.76	29.65	29.37	68.19	70.51	91.79
24576	chr16	4789475	4790475	-34	Cdip1	93.49	87.07	-0.26	-0.48	93.49	49.84	46.55	64.32	87.07	118.56	78.35	83.55	60.65	38.37	50.49	45.98	52.78	40.88	53.96	57.17	81.82	86.91	89.52	84.78
35250	chr2	36191249	36192249	-38677	Ptgs1	4.99	14.8	-1.96	-1.82	4.99	8.25	6.63	10.59	14.8	2.4	9.12	3.45	5.95	9.33	9.47	10.95	3.3	5.64	8.59	10.59	12.59	9.36	19.62	15.41
31637	chr18	70261501	70262501	-17417	Dynap	51.76	9.69	2.01	-4.59	51.76	45.87	35.84	4.98	9.69	57.48	41.86	55.93	65.41	26.97	45.23	31.74	46.18	29.61	1.23	7.41	6.29	12.7	12.88	3.5
56246	chr7	16804358	16805358	-11031	Strn4	17.35	11.26	0.25	-0.14	17.35	11.22	7.94	6.61	11.26	19.16	17.71	15.19	19.03	7.26	7.36	10.95	4.4	8.46	6.13	7.41	6.29	16.71	7.97	9.11
36764	chr2	94690107	94691107	-252421	Api5	36.73	36.16	-0.33	-0.37	36.73	20.53	13.84	6.68	36.16	44.31	37.57	28.31	34.49	16.59	10.52	12.04	15.39	14.1	7.36	10.59	2.1	30.08	39.85	38.54
48710	chr5	26444669	26445669	48145	4930584F24Rik	12.93	6.3	0.66	-0.36	12.93	18.32	18.81	6.84	6.3	16.77	7.51	14.5	22.6	17.63	14.73	15.33	24.19	16.92	11.04	5.29	4.2	6.02	3.07	9.81
34649	chr2	18777959	18778959	-17597	Gm3363	9.9	9.41	-0.29	-0.14	9.9	4.08	4.34	5.51	9.41	8.38	12.34	8.98	5.95	2.07	4.21	4.38	4.4	4.23	4.91	7.41	4.2	8.69	10.42	9.11
41671	chr3	89147233	89148233	11110	Pklr	16.19	9.62	0.35	-0.2	16.19	15.64	9.14	17.33	9.62	11.98	14.49	22.1	24.97	9.33	12.62	9.85	7.7	9.87	17.17	20.12	14.69	14.04	9.2	5.61
66977	chrX	21775305	21776305	60905	Slc6a14	3.22	19.39	-2.89	-3.68	3.22	2.19	2.2	5.85	19.39	0	4.83	4.83	2.38	1.04	3.16	1.09	5.5	0	4.91	4.24	8.39	18.05	18.39	21.72
13554	chr12	38778240	38779240	-1342	Etv1	110.69	81.86	0.09	-0.12	110.69	61.87	65.28	52.75	81.86	119.76	97.68	114.63	99.9	38.37	47.33	77.72	65.97	52.16	53.96	47.65	56.65	66.19	93.2	86.18
32577	chr19	11818227	11819227	676	Stx3	50.56	61.92	-0.64	-1.5	50.56	22.34	25.7	38.43	61.92	51.5	45.62	54.55	35.68	14.52	16.83	28.46	27.49	21.15	40.47	37.06	37.76	60.17	57.64	67.96
19966	chr14	44107300	44108300	4913	Ear3	13.24	5.31	0.94	-0.6	13.24	5.7	2.87	5.33	5.31	13.17	8.59	17.95	11.89	4.15	1.05	2.19	2.2	4.23	8.59	5.29	2.1	6.02	4.29	5.61
53403	chr6	53778294	53779294	42031	Tril	2.87	23.06	-3.49	-4.96	2.87	10.48	11.02	7.14	23.06	2.4	0	6.21	9.51	10.37	11.57	12.04	5.5	15.51	9.81	7.41	4.2	20.06	23.91	25.22
30107	chr18	15281117	15282117	121382	Aqp4	20.48	34.91	-1.09	-1.6	20.48	12.05	8.25	7.96	34.91	9.58	31.13	20.72	14.27	13.48	8.41	6.57	5.5	12.69	4.91	8.47	10.49	26.07	38.01	40.64
19771	chr14	32597028	32598028	-1880	Prrxl1	39.62	28.24	0.14	-0.12	39.62	22.48	26.48	19.35	28.24	47.9	34.35	36.6	30.92	20.74	15.78	30.65	21.99	26.79	23.3	15.88	18.88	23.4	26.98	34.33
9387	chr11	20400513	20401513	-68300	Slc1a4	20.47	25.88	-0.72	-0.81	20.47	14.87	10.76	11.18	25.88	13.17	17.17	31.07	14.27	12.45	17.88	14.23	11	7.05	6.13	12.71	14.69	24.74	31.88	21.02
15310	chr12	104983244	104984244	14933	Syne3	33.4	12.13	1.1	-1.35	33.4	27.63	23.65	25.44	12.13	35.93	26.3	37.98	46.38	21.78	14.73	29.56	13.19	28.2	25.76	21.18	29.37	8.02	7.36	21.02
32344	chr19	5893703	5894703	-75	Tigd3	47.94	48.28	-0.36	-0.54	47.94	28.42	17.44	24.44	48.28	49.1	47.76	46.96	32.11	35.26	17.88	19.7	14.29	18.33	26.98	19.06	27.27	46.13	54.57	44.14
26215	chr16	62853973	62854973	166	Pros1	69.44	52.07	0.06	-0.06	69.44	33.05	31.49	26.95	52.07	74.25	57.42	76.65	59.46	19.71	19.99	31.74	27.49	35.25	35.57	18	27.27	46.13	63.15	46.94
27052	chr16	95665316	95666316	-36591	Ets2	30.42	4.54	2.35	-3.31	30.42	17.39	14.21	6.15	4.54	40.72	23.61	26.93	16.65	17.63	17.88	16.42	12.1	14.1	3.68	8.47	6.29	6.69	5.52	1.4
17427	chr13	63092745	63093745	128352	2010111I01Rik	26.08	7.61	1.43	-1.69	26.08	9.25	12.44	13.85	7.61	27.54	23.08	27.62	13.08	4.15	10.52	10.95	16.49	9.87	11.04	9.53	20.98	2.67	11.04	9.11
50077	chr5	86684367	86685367	-8569	Tmprss11b	14.64	15.79	-0.49	-0.33	14.64	8.41	6.69	7.33	15.79	13.17	5.9	24.86	9.51	5.19	10.52	8.76	9.9	1.41	6.13	11.65	4.2	18.72	15.33	13.31
644	chr1	34100112	34101112	-16747	Mir6896	22.39	9.81	0.8	-0.68	22.39	8.74	6.48	4.38	9.81	28.74	12.88	25.55	9.51	8.3	8.41	5.47	5.5	8.46	3.68	3.18	6.29	10.7	6.13	12.61
3360	chr1	139857422	139858422	777	Cfhr2	11.85	5.51	0.69	-0.39	11.85	4.56	1.83	1.93	5.51	10.78	12.34	12.43	9.51	2.07	2.1	4.38	1.1	0	3.68	2.12	0	4.01	5.52	7.01
48746	chr5	28476154	28477154	-9553	Shh	16.46	7.43	0.8	-0.59	16.46	10.44	6.95	8.13	7.43	13.17	18.25	17.95	16.65	5.19	9.47	5.47	5.5	9.87	8.59	7.41	8.39	8.02	7.97	6.31
25201	chr16	26400505	26401505	-29166	Cldn1	51.79	22.31	0.85	-1.46	51.79	14.87	15.88	18.24	22.31	59.88	40.25	55.24	23.79	14.52	6.31	14.23	16.49	16.92	22.08	13.76	18.88	16.05	31.27	19.62
50274	chr5	92953984	92954984	56491	Shroom3	20.24	13.21	0.23	-0.14	20.24	15.29	16.97	16.84	13.21	19.16	13.95	27.62	24.97	9.33	11.57	19.7	14.29	16.92	14.72	14.82	20.98	12.03	12.88	14.71
18633	chr13	107922777	107923777	-33213	Zswim6	22.99	5.91	1.59	-1.78	22.99	11.65	11.23	8.6	5.91	23.95	23.61	21.41	11.89	6.22	16.83	10.95	4.4	18.33	11.04	8.47	6.29	8.02	5.52	4.2
34773	chr2	23321006	23322006	260	Nxph2	27.97	17.18	0.36	-0.28	27.97	10.53	12.12	13.67	17.18	19.16	24.69	40.05	10.7	9.33	11.57	6.57	14.29	15.51	14.72	7.41	18.88	17.38	20.85	13.31
32997	chr19	25688204	25689204	16293	Dmrt2	20.79	4.61	1.88	-1.87	20.79	9.25	12.02	7.25	4.61	14.37	15.56	32.45	13.08	4.15	10.52	8.76	13.19	14.1	12.26	5.29	4.2	5.35	4.29	4.2
2273	chr1	90397048	90398048	193568	Ackr3	17.58	7.26	0.92	-0.72	17.58	9.48	5.18	6.33	7.26	16.77	16.64	19.33	10.7	9.33	8.41	2.19	7.7	5.64	7.36	9.53	2.1	4.01	7.97	9.81
60247	chr8	24445280	24446280	-6834	Tcim	9.71	39.81	-2.4	-6.32	9.71	2.64	5.85	4.27	39.81	7.19	10.2	11.74	4.76	0	3.16	7.66	9.9	0	1.23	3.18	8.39	42.79	37.4	39.24
49463	chr5	57756870	57757870	39289	Pcdh7	47.39	19.77	0.89	-1.55	47.39	31.46	25.07	18.66	19.77	47.9	39.71	54.55	46.38	28	19.99	21.89	20.89	32.43	23.3	18	14.69	20.06	19.62	19.62
39578	chr3	7331622	7332622	-34482	Pkia	13.8	10.6	0.05	-0.02	13.8	2.98	2.61	2.98	10.6	16.77	12.88	11.74	4.76	2.07	2.1	2.19	0	5.64	3.68	1.06	4.2	5.35	15.94	10.51
9207	chr11	12374668	12375668	36972	Cobl	30.14	30.58	-0.37	-0.4	30.14	16.5	16.4	22.46	30.58	37.13	28.44	24.86	11.89	18.67	18.93	10.95	14.29	23.97	14.72	21.18	31.47	34.1	28.2	29.43
24416	chr15	101221312	101222312	565	AU021063	35.23	27.08	0.02	-0.01	35.23	16.08	11.91	11.18	27.08	43.11	32.2	30.38	19.03	16.59	12.62	9.85	13.19	12.69	13.49	11.65	8.39	28.08	30.04	23.12
41307	chr3	79696927	79697927	40524	Rxfp1	11.17	4.45	0.98	-0.53	11.17	4.41	5.12	2.93	4.45	7.19	11.81	14.5	5.95	6.22	1.05	3.28	2.2	9.87	2.45	4.24	2.1	6.69	2.45	4.2
3330	chr1	138730709	138731709	-49134	Gm5833	36.3	21.66	0.41	-0.43	36.3	30.24	18.28	13.57	21.66	34.73	37.57	36.6	49.95	18.67	22.09	24.08	20.89	9.87	19.62	10.59	10.49	16.71	30.04	18.22
64718	chr9	56559284	56560284	75864	Lingo1	14.1	6.4	0.76	-0.45	14.1	16.43	19.22	16.68	6.4	22.75	6.44	13.12	27.35	9.33	12.62	16.42	18.69	22.56	18.4	19.06	12.59	5.35	6.13	7.71
52670	chr6	28860736	28861736	-29489	Lrrc4	15.01	5.49	1.16	-0.84	15.01	8.29	10.61	5.91	5.49	21.56	9.66	13.81	7.14	9.33	8.41	9.85	12.1	9.87	6.13	7.41	4.2	3.34	6.13	7.01
26786	chr16	88280089	88281089	9669	Grik1	16.78	6.1	1.1	-0.85	16.78	4.52	3.97	3.4	6.1	20.36	13.42	16.57	8.32	2.07	3.16	3.28	4.4	4.23	4.91	3.18	2.1	9.36	6.13	2.8
36594	chr2	89972388	89973388	-4892	Olfr1260	19.99	30.67	-0.98	-1.5	19.99	19.16	15.1	3.98	30.67	15.57	16.1	28.31	24.97	7.26	25.24	12.04	12.1	21.15	2.45	5.29	4.2	26.07	33.72	32.23
19554	chr14	24997252	24998252	-111509	Gm32123	17.48	20.61	-0.6	-0.56	17.48	5.42	6.53	16.43	20.61	13.17	22	17.26	4.76	5.19	6.31	8.76	6.6	4.23	20.85	11.65	16.78	22.06	20.85	18.92
14735	chr12	85279944	85280944	-9	Acyp1	46.37	41.62	-0.21	-0.23	46.37	17.82	21.2	18.94	41.62	38.32	48.3	52.48	19.03	19.71	14.73	24.08	19.79	19.74	14.72	14.82	27.27	33.43	41.69	49.75
4857	chr1	190190115	190191115	-19788	Prox1	8.3	19.05	-1.55	-1.85	8.3	4.63	2.3	5.91	19.05	9.58	9.12	6.21	2.38	3.11	8.41	0	5.5	1.41	6.13	7.41	4.2	22.73	14.1	20.32
4828	chr1	189245653	189246653	97200	Kcnk2	9.76	13.41	-0.79	-0.6	9.76	4.38	6.74	3.45	13.41	9.58	10.73	8.98	4.76	3.11	5.26	8.76	4.4	7.05	6.13	2.12	2.1	10.7	19.01	10.51
64756	chr9	57644952	57645952	201	Csk	39.48	49.26	-0.66	-1.09	39.48	22.07	16.77	14.97	49.26	55.09	39.18	24.17	29.73	23.85	12.62	15.33	20.89	14.1	12.26	13.76	18.88	45.46	53.96	48.35
53885	chr6	75558148	75559148	-1683829	Lrrtm1	7.5	35.69	-2.58	-6.12	7.5	5.35	8.15	8.71	35.69	4.79	8.05	9.67	11.89	2.07	2.1	7.66	5.5	11.28	6.13	7.41	12.59	32.09	34.34	40.64
38675	chr2	157456956	157457956	33163	Src	61.63	68.12	-0.5	-1.08	61.63	28.63	31.13	36.85	68.12	63.47	60.64	60.77	27.35	25.93	32.61	28.46	29.69	35.25	29.44	37.06	44.06	70.87	61.31	72.17
24007	chr15	89088693	89089693	155	Selenoo	41.62	44.51	-0.44	-0.58	41.62	26.85	22.83	22.35	44.51	46.71	47.76	30.38	26.16	22.82	31.56	19.7	21.99	26.79	26.98	23.29	16.78	44.79	55.8	32.93
21275	chr14	96217749	96218749	300785	Klhl1	59.72	13.5	1.81	-4.77	59.72	6.32	13.11	17.25	13.5	59.88	58.5	60.77	9.51	1.04	8.41	13.14	12.1	14.1	15.94	14.82	20.98	6.69	18.39	15.41
2001	chr1	80854045	80855045	-95992	Dock10	46.52	15.42	1.22	-2	46.52	15.45	10.35	5.32	15.42	51.5	25.22	62.84	20.22	12.45	13.67	7.66	12.1	11.28	8.59	3.18	4.2	18.05	18.39	9.81
50980	chr5	117626591	117627591	213089	Ksr2	20.66	13.41	0.29	-0.19	20.66	6.9	12.7	10.88	13.41	17.96	24.69	19.33	7.14	7.26	6.31	12.04	17.59	8.46	14.72	9.53	8.39	14.04	17.78	8.41
66469	chr9	117072042	117073042	179941	Rbms3	30.43	19.62	0.25	-0.19	30.43	9.52	13.94	9.13	19.62	31.14	21.47	38.67	11.89	11.41	5.26	19.7	6.6	15.51	7.36	9.53	10.49	25.4	15.94	17.52
47559	chr4	139865249	139866249	-32781	Pax7	8.41	8.91	-0.47	-0.19	8.41	3.18	6.74	9.47	8.91	17.96	5.9	1.38	1.19	4.15	4.21	5.47	7.7	7.05	7.36	6.35	14.69	8.69	6.13	11.91
52669	chr6	28854295	28855295	-23048	Lrrc4	25.06	13.82	0.46	-0.35	25.06	8.51	10.04	9.3	13.82	37.13	11.81	26.24	11.89	2.07	11.57	5.47	17.59	7.05	11.04	8.47	8.39	12.03	14.72	14.71
38326	chr2	147083872	147084872	973	Nkx2-4	24.85	29.08	-0.6	-0.73	24.85	10.63	6.64	12.29	29.08	31.14	17.17	26.24	13.08	8.3	10.52	6.57	7.7	5.64	7.36	14.82	14.69	30.75	31.27	25.22
39634	chr3	9066750	9067750	5286	4930539M17Rik	13.62	14.41	-0.44	-0.29	13.62	8.73	8.1	5.85	14.41	19.16	8.59	13.12	9.51	9.33	7.36	9.85	8.8	5.64	4.91	4.24	8.39	17.38	15.33	10.51
30857	chr18	44996684	44997684	168519	Ythdc2	3.94	15.38	-2.44	-2.57	3.94	4.67	3.87	3.51	15.38	2.4	3.22	6.21	3.57	6.22	4.21	4.38	4.4	2.82	0	4.24	6.29	14.71	10.42	21.02
61725	chr8	78678161	78679161	142491	Lsm6	20.48	9.83	0.73	-0.61	20.48	6.57	7.11	7.66	9.83	21.56	15.03	24.86	7.14	3.11	9.47	2.19	12.1	7.05	6.13	8.47	8.39	10.03	11.04	8.41
65238	chr9	74530026	74531026	-317911	Gm16551	7.42	17.21	-1.56	-1.6	7.42	5.72	4.34	7	17.21	4.79	11.27	6.21	3.57	6.22	7.36	3.28	5.5	4.23	7.36	1.06	12.59	19.39	9.81	22.42
12364	chr11	114675074	114676074	106	Ttyh2	41.89	41.04	-0.31	-0.39	41.89	25.39	20.1	21.11	41.04	51.5	37.57	36.6	33.3	18.67	24.19	27.37	13.19	19.74	23.3	16.94	23.08	42.79	41.08	39.24
26517	chr16	76765026	76766026	13566	Gm30790	45.64	28.26	0.33	-0.38	45.64	19.88	14.84	10.48	28.26	43.11	41.32	52.48	26.16	13.48	19.99	15.33	16.49	12.69	13.49	11.65	6.29	27.41	25.14	32.23
13244	chr12	28556905	28557905	-9068	Dcdc2c	11.37	4.04	1.17	-0.68	11.37	10.51	6.48	5.27	4.04	9.58	10.73	13.81	10.7	14.52	6.31	5.47	5.5	8.46	7.36	4.24	4.2	6.69	1.23	4.2
56683	chr7	34888717	34889717	-23190	Pepd	14.79	4.68	1.2	-0.86	14.79	5.41	6.22	6.32	4.68	14.37	13.42	16.57	4.76	6.22	5.26	4.38	4.4	9.87	7.36	7.41	4.2	2.67	8.58	2.8
44492	chr4	32054812	32055812	91205	Map3k7	16.16	19.52	-0.64	-0.6	16.16	14.17	11.39	14.15	19.52	15.57	12.88	20.03	14.27	12.45	15.78	7.66	11	15.51	9.81	13.76	18.88	20.72	14.72	23.12
4669	chr1	184051519	184052519	17638	Dusp10	23.89	6.46	1.56	-1.8	23.89	13.66	6.64	12.92	6.46	22.75	22	26.93	19.03	10.37	11.57	5.47	8.8	5.64	13.49	10.59	14.69	6.69	4.29	8.41
45756	chr4	83166806	83167806	-115140	Frem1	12.04	42.24	-2.13	-5.07	12.04	6.04	4.81	4.85	42.24	9.58	18.25	8.29	11.89	5.19	1.05	4.38	4.4	5.64	6.13	2.12	6.29	33.43	58.25	35.03
53111	chr6	43265455	43266455	311	Arhgef5	72.2	65.3	-0.22	-0.32	72.2	23.88	27.21	33.14	65.3	74.25	57.42	84.93	30.92	21.78	18.93	31.74	23.09	26.79	47.83	22.23	29.37	46.13	69.9	79.88
42429	chr3	116007348	116008348	399	Extl2	95.56	93.05	-0.33	-0.74	95.56	63.15	62.16	55.43	93.05	93.41	86.94	106.34	89.2	51.86	48.39	62.4	64.88	59.21	58.87	46.59	60.84	98.28	82.77	98.09
44386	chr4	26506267	26507267	-160115	Manea	30.68	9.8	1.3	-1.77	30.68	16.25	15.05	10.6	9.8	31.14	23.61	37.29	22.6	11.41	14.73	12.04	17.59	15.51	15.94	13.76	2.1	8.02	12.26	9.11
58028	chr7	89603411	89604411	-28907	Me3	6.87	22.02	-2.02	-2.86	6.87	3.13	6.63	2.16	22.02	7.19	3.76	9.67	0	5.19	4.21	8.76	5.5	5.64	1.23	1.06	4.2	14.04	28.2	23.82
5173	chr10	6694146	6695146	-63947	Oprm1	18.2	12.95	0.13	-0.07	18.2	10.43	11.6	7.89	12.95	16.77	15.03	22.79	16.65	6.22	8.41	8.76	7.7	18.33	11.04	6.35	6.29	13.37	17.78	7.71
3171	chr1	134764578	134765578	38643	Ppp1r12b	46.26	11.71	1.59	-3.24	46.26	14.74	22.31	16.75	11.71	51.5	37.57	49.72	20.22	13.48	10.52	21.89	25.29	19.74	19.62	22.23	8.39	16.05	8.58	10.51
58961	chr7	121981081	121982081	112	Cog7	25.25	39.22	-1	-1.89	25.25	23.12	19.07	17.84	39.22	22.75	19.86	33.15	29.73	23.85	15.78	16.42	25.29	15.51	13.49	19.06	20.98	32.09	38.63	46.94
62055	chr8	89605605	89606605	-561943	Sall1	47.26	7.17	2.32	-5.01	47.26	25.19	28.52	28.09	7.17	63.47	32.74	45.57	38.06	25.93	11.57	30.65	25.29	29.61	29.44	29.65	25.18	6.69	9.2	5.61
6593	chr10	59920639	59921639	30631	Ddit4	23.66	27.57	-0.56	-0.62	23.66	15.34	11.75	15.54	27.57	16.77	25.22	29	17.84	14.52	13.67	12.04	7.7	15.51	24.53	7.41	14.69	21.39	31.88	29.43
48875	chr5	33487904	33488904	-54314	Nkx1-1	16.47	8.97	0.55	-0.35	16.47	6.81	9.03	10.76	8.97	11.98	18.78	18.64	4.76	8.3	7.36	12.04	6.6	8.46	12.26	9.53	10.49	5.35	11.04	10.51
60500	chr8	33584197	33585197	14153	Tex15	15.41	14.44	-0.23	-0.14	15.41	6.56	8.15	5.09	14.44	16.77	12.88	16.57	7.14	5.19	7.36	4.38	8.8	11.28	3.68	5.29	6.29	13.37	15.94	14.01
51341	chr5	130028903	130029903	97	Crcp	27.53	25.31	-0.24	-0.2	27.53	21.82	13.53	16.48	25.31	31.14	25.22	26.24	30.92	12.45	22.09	18.61	12.1	9.87	14.72	11.65	23.08	25.4	33.72	16.82
13802	chr12	50877272	50878272	-127384	1700008C04Rik	13.12	5.5	0.91	-0.55	13.12	5.52	6.27	3.75	5.5	8.38	12.34	18.64	7.14	3.11	6.31	6.57	6.6	5.64	4.91	6.35	0	8.02	4.29	4.2
14686	chr12	84030663	84031663	-7216	Acot4	12.74	8.32	0.24	-0.12	12.74	5.85	4.23	8.36	8.32	14.37	10.73	13.12	7.14	7.26	3.16	4.38	5.5	2.82	6.13	6.35	12.59	9.36	8.58	7.01
25495	chr16	35703726	35704726	65130	Dirc2	15.25	36.11	-1.6	-3.36	15.25	6.21	7	10.17	36.11	14.37	18.25	13.12	7.14	5.19	6.31	7.66	7.7	5.64	14.72	7.41	8.39	29.42	45.99	32.93
38382	chr2	148509873	148510873	-66838	Cd93	18.43	22.07	-0.62	-0.58	18.43	3.33	5.59	8.19	22.07	9.58	18.78	26.93	4.76	2.07	3.16	8.76	6.6	1.41	9.81	8.47	6.29	18.72	20.85	26.63
21439	chr14	101901204	101902204	61081	Lmo7	35.07	17.78	0.64	-0.76	35.07	6.71	5.44	6.97	17.78	34.73	35.96	34.53	10.7	3.11	6.31	4.38	7.7	4.23	6.13	10.59	4.2	23.4	15.94	14.01
58895	chr7	119525762	119526762	-3	Acsm5	5.07	12.49	-1.71	-1.29	5.07	9.1	7	7.55	12.49	2.4	1.07	11.74	9.51	6.22	11.57	7.66	7.7	5.64	3.68	8.47	10.49	13.37	12.88	11.21
22070	chr15	7216801	7217801	76759	Lifr	15.88	4.93	1.32	-0.9	15.88	8.83	9.77	14.15	4.93	15.57	13.42	18.64	11.89	8.3	6.31	13.14	7.7	8.46	9.81	11.65	20.98	0	4.29	10.51
47459	chr4	137200045	137201045	-35479	Gm13003	13.71	6.31	0.75	-0.47	13.71	12.62	12.12	16.39	6.31	17.96	10.73	12.43	19.03	6.22	12.62	12.04	8.8	15.51	12.26	20.12	16.78	5.35	7.97	5.61
20734	chr14	70129786	70130786	23505	Ccar2	36.45	11.78	1.28	-1.85	36.45	14.77	15.99	16.39	11.78	44.31	33.27	31.76	13.08	22.82	8.41	13.14	16.49	18.33	19.62	19.06	10.49	17.38	11.65	6.31
43614	chr3	152568769	152569769	-97644	AI115009	12.5	31.41	-1.71	-3.33	12.5	10.68	5.18	9.81	31.41	9.58	13.42	14.5	14.27	8.3	9.47	2.19	7.7	5.64	7.36	3.18	18.88	24.07	38.63	31.53
39651	chr3	9406912	9407912	4334	C030034L19Rik	24.63	30.07	-0.65	-0.86	24.63	12.82	10.71	10.41	30.07	23.95	20.93	29	15.46	10.37	12.62	9.85	11	11.28	12.26	10.59	8.39	30.75	30.04	29.43
51304	chr5	129007885	129008885	187	Stx2	52.03	45.02	-0.15	-0.16	52.03	34.64	19.12	22.64	45.02	58.68	45.62	51.79	47.57	32.15	24.19	14.23	21.99	21.15	25.76	21.18	20.98	36.77	57.64	40.64
13899	chr12	54203140	54204140	234	Egln3	59.73	51.15	-0.15	-0.18	59.73	23.34	23.4	23.79	51.15	61.08	50.45	67.67	26.16	22.82	21.04	29.56	20.89	19.74	20.85	19.06	31.47	52.82	50.89	49.75
42895	chr3	130449484	130450484	-167464	Etnppl	14.54	6.64	0.74	-0.48	14.54	8.48	11.07	6.33	6.64	16.77	12.34	14.5	11.89	8.3	5.26	13.14	8.8	11.28	7.36	9.53	2.1	4.68	6.13	9.11
60167	chr8	20874280	20875280	-1719	Gm21944	30.67	12.11	1	-1.23	30.67	8.04	10.34	8.78	12.11	28.74	27.37	35.91	9.51	7.26	7.36	9.85	9.9	11.28	7.36	10.59	8.39	9.36	17.17	9.81
35318	chr2	39007580	39008580	-59	Arpc5l	80.23	81.28	-0.38	-0.84	80.23	53.98	68.81	55.15	81.28	92.21	69.77	78.72	77.3	40.45	44.18	55.83	75.87	74.72	52.74	51.88	60.84	69.53	89.52	84.78
23421	chr15	67385807	67386807	159538	1700012I11Rik	5.72	10.9	-1.18	-0.83	5.72	4.67	3.76	3.33	10.9	3.59	8.05	5.52	3.57	5.19	5.26	5.47	4.4	1.41	3.68	2.12	4.2	12.03	7.36	13.31
51082	chr5	121384864	121385864	45	Trafd1	38.8	46.11	-0.6	-0.99	38.8	21.28	20.78	26.14	46.11	50.3	34.35	31.76	26.16	12.45	25.24	26.27	12.1	23.97	25.76	23.29	29.37	39.44	58.25	40.64
41491	chr3	84352910	84353910	26511	4930565D16Rik	19.18	6.15	1.32	-1.15	19.18	4.68	5.9	9	6.15	21.56	16.64	19.33	3.57	4.15	6.31	5.47	6.6	5.64	12.26	6.35	8.39	11.37	4.29	2.8
1435	chr1	62612575	62613575	-90242	Nrp2	8.1	3.65	0.81	-0.33	8.1	2.94	2.4	5.27	3.65	7.19	10.2	6.91	3.57	0	5.26	1.09	3.3	2.82	7.36	4.24	4.2	0	6.74	4.2
31468	chr18	65430613	65431613	116	Malt1	119.08	100.08	-0.11	-0.18	119.08	64.94	60.71	65.26	100.08	122.15	102.51	132.58	89.2	43.56	62.06	50.35	72.57	59.21	58.87	59.29	77.62	105.63	99.33	95.29
27338	chr17	9764509	9765509	10857	4930452A19Rik	36.01	27.46	0.04	-0.03	36.01	10.24	10.34	9.56	27.46	29.94	35.96	42.12	11.89	7.26	11.57	9.85	9.9	11.28	8.59	18	2.1	26.07	32.5	23.82
483	chr1	24361969	24362969	167266	Col9a1	18.62	9.54	0.59	-0.42	18.62	9.58	6.27	2.7	9.54	21.56	12.88	21.41	13.08	8.3	7.36	7.66	5.5	5.64	4.91	3.18	0	8.02	12.88	7.71
38527	chr2	152951102	152952102	-20	Dusp15	25.98	21.13	-0.08	-0.05	25.98	14.79	11.33	14.02	21.13	27.54	19.32	31.07	21.41	12.45	10.52	18.61	5.5	9.87	14.72	6.35	20.98	18.72	20.85	23.82
39061	chr2	167941936	167942936	10109	Ptpn1	24.3	13.01	0.54	-0.44	24.3	17.59	11.7	13.46	13.01	32.33	15.03	25.55	21.41	14.52	16.83	10.95	14.29	9.87	17.17	12.71	10.49	13.37	16.55	9.11
68145	chrX	155167641	155168641	-20292	Cldn34b2	6.71	11.23	-1.1	-0.75	6.71	2.49	5.8	1.64	11.23	10.78	5.9	3.45	1.19	2.07	4.21	8.76	4.4	4.23	4.91	0	0	8.02	16.55	9.11
66797	chrX	9077412	9078412	14822	Fthl17f	8.04	7.06	-0.24	-0.09	8.04	7.69	6.37	5.73	7.06	8.38	5.37	10.36	9.51	7.26	6.31	6.57	5.5	7.05	2.45	6.35	8.39	4.01	7.36	9.81
65100	chr9	69452934	69453934	-249	Anxa2	38.45	49.03	-0.72	-1.43	38.45	27.71	25.08	22.81	49.03	43.11	27.37	44.88	30.92	26.97	25.24	16.42	26.39	32.43	22.08	21.18	25.18	43.46	54.57	49.05
60142	chr8	19702753	19703753	-26323	Gm21119	46.34	36.23	0	0	46.34	24.87	24.86	23.16	36.23	53.89	45.08	40.05	38.06	19.71	16.83	21.89	23.09	29.61	14.72	21.18	33.57	34.76	41.69	32.23
7983	chr10	101358966	101359966	-322021	Mgat4c	8.23	11.58	-0.87	-0.61	8.23	3.94	3.13	2.52	11.58	7.19	6.44	11.05	2.38	2.07	7.36	3.28	3.3	2.82	1.23	2.12	4.2	13.37	12.26	9.11
26892	chr16	91464616	91465616	12	A930006K02Rik	47.75	45.71	-0.29	-0.37	47.75	20.46	22.3	25.08	45.71	47.9	40.79	54.55	23.79	18.67	18.93	18.61	18.69	29.61	25.76	18	31.47	51.48	52.73	32.93
7758	chr10	94585529	94586529	170	Mir7211	14.62	7.71	0.64	-0.38	14.62	17.38	8.42	15.32	7.71	9.58	17.71	16.57	24.97	12.45	14.73	4.38	11	9.87	12.26	14.82	18.88	5.35	12.88	4.9
22065	chr15	7118568	7119568	-10504	Lifr	17.16	6.74	0.95	-0.73	17.16	11.58	9.55	6.43	6.74	17.96	15.56	17.95	10.7	11.41	12.62	16.42	6.6	5.64	2.45	4.24	12.59	6.02	3.68	10.51
2080	chr1	83831922	83832922	386539	Mir6353	17.56	21.3	-0.62	-0.62	17.56	5.76	5.8	3.97	21.3	15.57	19.86	17.26	4.76	6.22	6.31	6.57	6.6	4.23	2.45	3.18	6.29	24.74	20.23	18.92
23525	chr15	73706937	73707937	68	Gpr20	25.09	25.8	-0.42	-0.42	25.09	14.44	12.75	16.21	25.8	23.95	20.93	30.38	13.08	18.67	11.57	13.14	11	14.1	15.94	18	14.69	20.72	25.14	31.53
56679	chr7	34745841	34746841	66370	Chst8	9.25	27.61	-1.94	-3.52	9.25	12.05	10.61	21.01	27.61	9.58	6.44	11.74	14.27	13.48	8.41	8.76	13.19	9.87	20.85	23.29	18.88	26.07	24.53	32.23
11996	chr11	103675258	103676258	21952	Gosr2	12.42	9.95	0.03	-0.01	12.42	7.59	8.05	14.09	9.95	9.58	11.81	15.88	7.14	10.37	5.26	4.38	9.9	9.87	8.59	12.71	20.98	9.36	13.49	7.01
66653	chr9	121995418	121996418	108	Pomgnt2	32.95	23.05	0.13	-0.1	32.95	17.62	15.4	14.53	23.05	34.73	22	42.12	22.6	16.59	13.67	19.7	11	15.51	17.17	22.23	4.2	20.72	28.82	19.62
2416	chr1	95294348	95295348	-18780	Fam174a	12.03	41.5	-2.14	-5.55	12.03	3.47	4.59	1.76	41.5	7.19	12.34	16.57	8.32	1.04	1.05	7.66	3.3	2.82	0	3.18	2.1	35.43	48.44	40.64
49054	chr5	39715733	39716733	-71602	Hs3st1	16.16	48.87	-1.94	-0.61	16.16	11.48	4.8	11.11	48.87	0	18.78	29.69	16.65	7.26	10.52	5.47	3.3	5.64	4.91	9.53	18.88	49.47	50.89	46.24
34601	chr2	17252904	17253904	-239678	4930515L03Rik	14.87	9.12	0.37	-0.2	14.87	6.01	9.51	9.78	9.12	22.75	8.05	13.81	10.7	2.07	5.26	9.85	8.8	9.87	13.49	11.65	4.2	6.69	12.26	8.41
21753	chr14	118686356	118687356	-9925	Abcc4	33.13	16.58	0.62	-0.69	33.13	17.78	20.06	23.21	16.58	31.14	26.83	41.43	26.16	11.41	15.78	15.33	20.89	23.97	23.3	19.06	27.27	16.71	14.1	18.92
17627	chr13	70772874	70773874	68437	Adamts16	13.16	4.04	1.37	-0.88	13.16	6.35	4.6	7.37	4.04	19.16	8.59	11.74	10.7	4.15	4.21	6.57	4.4	2.82	7.36	8.47	6.29	1.34	3.07	7.71
64451	chr9	47217758	47218758	219517	Gm4791	11.71	3.03	1.62	-1.04	11.71	6.3	7.68	5.78	3.03	9.58	14.49	11.05	9.51	5.19	4.21	6.57	6.6	9.87	3.68	3.18	10.49	4.01	3.68	1.4
60568	chr8	35021917	35022917	-56727	Tnks	11.16	3.14	1.34	-0.78	11.16	6.99	4.7	4.21	3.14	14.37	8.05	11.05	9.51	7.26	4.21	6.57	3.3	4.23	0	6.35	6.29	4.68	1.23	3.5
23411	chr15	67206045	67207045	-20224	1700012I11Rik	45.26	13.21	1.39	-2.48	45.26	25.68	12.85	7.65	13.21	58.68	27.37	49.72	32.11	21.78	23.14	10.95	12.1	15.51	6.13	4.24	12.59	15.38	11.65	12.61
22381	chr15	24595941	24596941	817323	Basp1	11.8	7.14	0.37	-0.18	11.8	7.22	7.52	4.44	7.14	14.37	8.59	12.43	5.95	5.19	10.52	12.04	7.7	2.82	4.91	2.12	6.29	8.02	9.2	4.2
64068	chr9	34498372	34499372	10141	Kirrel3	8.79	12.62	-0.91	-0.25	8.79	10.94	8.2	7.6	12.62	0	9.12	17.26	11.89	8.3	12.62	7.66	9.9	7.05	12.26	6.35	4.2	10.7	15.94	11.21
27983	chr17	32235638	32236638	-5782	Gm4432	11.87	6.38	0.53	-0.27	11.87	10.69	10.91	1.47	6.38	14.37	10.2	11.05	14.27	6.22	11.57	12.04	6.6	14.1	1.23	3.18	0	2.67	7.36	9.11
26951	chr16	92883647	92884647	-58073	Runx1	6.38	10.67	-1.07	-0.72	6.38	6.15	5.69	10.57	10.67	4.79	10.2	4.14	5.95	8.3	4.21	7.66	6.6	2.82	8.59	6.35	16.78	8.02	13.49	10.51
30771	chr18	42261715	42262715	-144	Lars	119.26	97.03	-0.06	-0.09	119.26	64.68	68.85	73.07	97.03	134.13	106.26	117.39	92.76	52.89	48.39	61.3	74.77	70.49	68.68	58.23	92.31	86.91	110.98	93.19
4536	chr1	180568543	180569543	152	Parp1	65.07	78.07	-0.62	-1.55	65.07	29.64	31.54	34.79	78.07	82.63	60.11	52.48	44	21.78	23.14	36.12	27.49	31.02	38.02	28.59	37.76	70.87	82.77	80.58
27553	chr17	16004795	16005795	-178709	Rgmb	14.57	31.64	-1.47	-2.39	14.57	5.87	6.84	7.3	31.64	9.58	18.25	15.88	7.14	4.15	6.31	6.57	5.5	8.46	6.13	5.29	10.49	18.72	30.66	45.54
12431	chr11	116109809	116110809	-74	Trim47	21.81	23.7	-0.49	-0.48	21.81	9.83	13.79	14.4	23.7	25.15	16.1	24.17	10.7	10.37	8.41	9.85	13.19	18.33	14.72	15.88	12.59	24.07	28.82	18.22
23437	chr15	68108593	68109593	149763	Zfat	4.94	14.27	-1.84	-1.71	4.94	5.55	4.81	5.15	14.27	2.4	4.83	7.6	8.32	6.22	2.1	3.28	5.5	5.64	4.91	6.35	4.2	11.37	20.23	11.21
41443	chr3	83374030	83375030	199588	1700028M03Rik	15.35	22.2	-0.9	-1.06	15.35	4.52	5.18	4.51	22.2	14.37	17.17	14.5	0	8.3	5.26	2.19	7.7	5.64	6.13	5.29	2.1	22.73	21.46	22.42
20924	chr14	76258065	76259065	7103	2900040C04Rik	12.63	13.65	-0.47	-0.32	12.63	15.88	10.24	7.55	13.65	11.98	10.73	15.19	22.6	14.52	10.52	7.66	13.19	9.87	11.04	7.41	4.2	13.37	12.88	14.71
40602	chr3	51859113	51860113	198434	Mgst2	16.45	8.41	0.59	-0.39	16.45	9.92	12.54	6.68	8.41	22.75	15.56	11.05	13.08	9.33	7.36	12.04	14.29	11.28	7.36	8.47	4.2	8.69	6.74	9.81
1409	chr1	61275662	61276662	-102270	9530026F06Rik	6.37	14.18	-1.54	-1.48	6.37	2.58	4.7	4.21	14.18	8.38	5.9	4.83	3.57	2.07	2.1	5.47	4.4	4.23	7.36	1.06	4.2	13.37	11.65	17.52
59025	chr7	124610188	124611188	98247	3100003L05Rik	22.16	11.13	0.66	-0.56	22.16	8.66	9.66	10.81	11.13	22.75	20.93	22.79	7.14	7.26	11.57	13.14	8.8	7.05	13.49	6.35	12.59	12.03	7.36	14.01
5895	chr10	30089120	30090120	110920	Cenpw	30.93	11.88	1	-1.17	30.93	13.11	8.94	11.45	11.88	22.75	27.91	42.12	22.6	7.26	9.47	7.66	12.1	7.05	12.26	7.41	14.69	16.71	9.81	9.11
43940	chr4	8423098	8424098	-112046	Rab2a	13.08	21.45	-1.03	-1.2	13.08	5.21	7.32	6.31	21.45	16.77	10.73	11.74	8.32	4.15	3.16	3.28	8.8	9.87	7.36	5.29	6.29	15.38	25.14	23.82
42359	chr3	109818651	109819651	245144	Vav3	10.32	29.02	-1.85	-3.55	10.32	5.68	3.86	7.18	29.02	10.78	9.12	11.05	2.38	5.19	9.47	5.47	3.3	2.82	3.68	3.18	14.69	27.41	28.82	30.83
60428	chr8	30735468	30736468	167573	4933433F19Rik	34.98	8.71	1.67	-2.77	34.98	6.86	8.94	28	8.71	39.52	29.52	35.91	5.95	6.22	8.41	8.76	11	7.05	35.57	19.06	29.37	6.69	11.04	8.41
33889	chr19	53345400	53346400	15492	Mxi1	18.69	8.19	0.82	-0.64	18.69	7.39	4.33	5.91	8.19	19.16	13.42	23.48	10.7	8.3	3.16	5.47	3.3	4.23	6.13	7.41	4.2	10.03	6.13	8.41
29234	chr17	75532153	75533153	19293	Fam98a	22	20.17	-0.24	-0.17	22	10.69	14.84	12.4	20.17	20.36	21.47	24.17	14.27	5.19	12.62	12.04	19.79	12.69	9.81	12.71	14.69	18.72	26.37	15.41
47045	chr4	126155558	126156558	6607	Sh3d21	11.27	19.51	-1.1	-1.15	11.27	11.14	8.67	7.14	19.51	7.19	15.56	11.05	8.32	10.37	14.73	10.95	6.6	8.46	2.45	8.47	10.49	17.38	25.75	15.41
45772	chr4	83417336	83418336	112	Snapc3	91.73	68.63	0.06	-0.07	91.73	69.46	53.39	59.39	68.63	93.41	78.89	102.89	98.71	53.93	55.75	52.54	58.28	49.34	61.32	45.53	71.33	62.17	72.96	70.77
39144	chr2	170220423	170221423	-78248	Zfp217	30.98	18.01	0.43	-0.4	30.98	23.08	22.04	16.49	18.01	40.72	27.37	24.86	28.54	21.78	18.93	26.27	18.69	21.15	14.72	15.88	18.88	16.71	23.3	14.01
17227	chr13	55182142	55183142	-27140	Nsd1	17.74	19.07	-0.49	-0.43	17.74	11.77	13.27	12.98	19.07	19.16	16.1	17.95	15.46	10.37	9.47	7.66	11	21.15	7.36	10.59	20.98	20.06	19.62	17.52
1088	chr1	51477481	51478481	418	Nabp1	93.36	83.5	-0.2	-0.34	93.36	56.31	48.43	56.23	83.5	102.99	68.69	108.41	83.25	41.49	44.18	40.5	58.28	46.52	53.96	41.29	73.43	76.21	99.33	74.97
979	chr1	44575680	44576680	24509	Gulp1	15.86	23.4	-0.89	-1.04	15.86	8.53	5.64	1.88	23.4	11.98	15.56	20.03	13.08	8.3	4.21	5.47	4.4	7.05	2.45	3.18	0	19.39	31.88	18.92
15060	chr12	98106107	98107107	152852	Galc	10.78	24.86	-1.55	-2.35	10.78	5.35	4.12	8.6	24.86	7.19	8.59	16.57	11.89	2.07	2.1	7.66	3.3	1.41	11.04	8.47	6.29	22.73	24.53	27.33
26463	chr16	74701849	74702849	-290524	Robo2	17.56	10.75	0.3	-0.17	17.56	6.01	11.65	11.76	10.75	25.15	12.34	15.19	2.38	9.33	6.31	13.14	7.7	14.1	18.4	10.59	6.29	8.69	16.55	7.01
26039	chr16	55719852	55720852	101786	Nfkbiz	22.97	6.01	1.56	-1.71	22.97	7.55	13.43	3.63	6.01	23.95	21.47	23.48	5.95	8.3	8.41	8.76	13.19	18.33	2.45	4.24	4.2	4.01	4.91	9.11
45671	chr4	79885727	79886727	-947986	Tyrp1	10.35	20	-1.33	-1.56	10.35	2.59	3.13	2.99	20	7.19	10.73	13.12	3.57	1.04	3.16	4.38	2.2	2.82	3.68	3.18	2.1	14.71	16.55	28.73
43157	chr3	138143109	138144109	92	Trmt10a	129.47	152.14	-0.59	-2.87	129.47	65.33	70.09	82.09	152.14	136.52	113.78	138.1	91.57	53.93	50.49	74.44	68.17	67.67	67.46	50.82	127.98	143.74	165.55	147.14
10381	chr11	55216815	55217815	12975	Slc36a1	31.96	8.28	1.57	-2.16	31.96	13.25	16.03	13.39	8.28	43.11	23.08	29.69	17.84	12.45	9.47	17.51	16.49	14.1	15.94	9.53	14.69	6.02	5.52	13.31
50671	chr5	107213048	107214048	76081	Tgfbr3	7.09	31.78	-2.52	-5.04	7.09	7	7.74	7.3	31.78	2.4	11.27	7.6	9.51	6.22	5.26	4.38	13.19	5.64	6.13	3.18	12.59	32.09	33.11	30.13
31075	chr18	53340587	53341587	76920	Ppic	17.17	6.22	1.12	-0.9	17.17	14.53	14.21	22.4	6.22	16.77	20.93	13.81	23.79	12.45	7.36	9.85	18.69	14.1	20.85	21.18	25.18	5.35	9.81	3.5
3764	chr1	157552759	157553759	27089	Sec16b	9.97	15.71	-0.97	-0.89	9.97	9.87	15.05	9.83	15.71	9.58	8.59	11.74	11.89	11.41	6.31	13.14	16.49	15.51	7.36	9.53	12.59	18.05	12.26	16.82
1707	chr1	72123328	72124328	88479	Mreg	15.5	16.24	-0.43	-0.3	15.5	9.4	6.63	6.31	16.24	21.56	11.81	13.12	8.32	8.3	11.57	7.66	6.6	5.64	7.36	3.18	8.39	21.39	14.72	12.61
30555	chr18	34776773	34777773	265	Kdm3b	55.28	67.58	-0.63	-1.48	55.28	15.88	18.17	18.76	67.58	51.5	56.35	58	30.92	8.3	8.41	19.7	16.49	18.33	11.04	15.88	29.37	53.48	83.39	65.86
32614	chr19	14240284	14241284	195166	Gm8630	120.03	74.69	0.32	-0.71	120.03	51.75	35.62	14.75	74.69	125.75	90.7	143.63	65.41	42.52	47.33	40.5	29.69	36.66	22.08	15.88	6.29	68.86	85.84	69.37
23398	chr15	66903990	66904990	13097	Wisp1	9.99	8.18	-0.09	-0.04	9.99	10.59	9.14	7.66	8.18	10.78	10.2	8.98	11.89	8.3	11.57	9.85	7.7	9.87	6.13	6.35	10.49	8.69	6.74	9.11
8038	chr10	104591729	104592729	304960	Mir6411	38.89	45.3	-0.57	-0.95	38.89	12.33	10.09	3.75	45.3	43.11	30.05	43.5	11.89	10.37	14.73	5.47	12.1	12.69	4.91	4.24	2.1	53.48	45.99	36.43
17110	chr13	51656200	51657200	4992	Secisbp2	32.01	6.51	1.97	-2.99	32.01	3.28	4.44	8.72	6.51	31.14	24.15	40.74	3.57	3.11	3.16	3.28	4.4	5.64	6.13	11.65	8.39	4.01	9.2	6.31
28955	chr17	66680330	66681330	-33626	1700016K05Rik	11.67	14.74	-0.7	-0.48	11.67	7.16	6.89	8.95	14.74	4.79	10.2	20.03	4.76	7.26	9.47	12.04	4.4	4.23	11.04	9.53	6.29	9.36	15.94	18.92
2517	chr1	104924313	104925313	156293	Cdh20	13.02	19.12	-0.92	-0.96	13.02	4.58	6.11	5.46	19.12	11.98	13.95	13.12	1.19	4.15	8.41	3.28	6.6	8.46	3.68	10.59	2.1	14.71	25.14	17.52
7547	chr10	87847683	87848683	-10082	Igf1	14.7	11.63	-0.03	-0.01	14.7	4.51	7.01	6.49	11.63	9.58	14.49	20.03	8.32	4.15	1.05	4.38	11	5.64	11.04	4.24	4.2	10.03	12.26	12.61
63757	chr9	23041469	23042469	-181107	Bmper	134.96	52.61	1	-4.52	134.96	99.12	94	47.47	52.61	141.32	106.8	156.75	133.2	70.53	93.62	73.34	109.96	98.69	31.89	39.18	71.33	47.47	56.41	53.95
62395	chr8	104091091	104092091	-10034	Cdh5	23.99	19.87	-0.11	-0.07	23.99	9.92	12.75	14.69	19.87	29.94	17.17	24.86	13.08	10.37	6.31	6.57	7.7	23.97	13.49	18	12.59	16.71	18.39	24.52
34477	chr2	12001975	12002975	224722	Ankrd16	16.35	15.44	-0.28	-0.18	16.35	7.46	7.58	7.41	15.44	14.37	13.95	20.72	11.89	2.07	8.41	4.38	9.9	8.46	8.59	1.06	12.59	20.06	12.26	14.01
19591	chr14	25754342	25755342	14014	Zcchc24	23.79	10.57	0.8	-0.75	23.79	14.79	9.87	11.82	10.57	20.36	26.83	24.17	21.41	13.48	9.47	9.85	9.9	9.87	12.26	12.71	10.49	12.7	9.2	9.81
24668	chr16	8512893	8513893	-36	Abat	65.33	57.28	-0.17	-0.22	65.33	39.03	33.7	30.52	57.28	67.06	53.67	75.27	52.33	32.15	32.61	26.27	39.58	35.25	29.44	24.35	37.76	54.82	68.67	48.35
20635	chr14	66695584	66696584	60833	Adra1a	9.61	4.33	0.8	-0.35	9.61	4.65	5.9	3.34	4.33	13.17	8.05	7.6	3.57	9.33	1.05	5.47	6.6	5.64	3.68	4.24	2.1	1.34	1.84	9.81
16934	chr13	45030752	45031752	-29156	Dtnbp1	14.48	19.62	-0.78	-0.75	14.48	11.96	9.51	8.12	19.62	10.78	16.1	16.57	20.22	7.26	8.41	7.66	11	9.87	8.59	5.29	10.49	20.06	12.88	25.92
15095	chr12	99116242	99117242	46066	4930474N09Rik	48.85	13.13	1.52	-3.23	48.85	26.91	29.31	8.72	13.13	53.89	42.93	49.72	45.19	15.56	19.99	20.8	31.89	35.25	6.13	11.65	8.39	16.71	12.88	9.81
28774	chr17	61325203	61326203	1555614	Efna5	5.53	15.38	-1.88	-1.72	5.53	3.28	3.86	2.87	15.38	2.4	5.9	8.29	3.57	3.11	3.16	5.47	3.3	2.82	1.23	3.18	4.2	7.35	12.88	25.92
40677	chr3	53705413	53706413	-48558	Frem2	17.35	7.33	0.86	-0.66	17.35	6.16	4.33	4.04	7.33	16.77	11.81	23.48	5.95	6.22	6.31	5.47	3.3	4.23	3.68	4.24	4.2	7.35	5.52	9.11
22647	chr15	35025157	35026157	130149	Stk3	6.07	13.49	-1.53	-1.35	6.07	2.99	4.23	2.69	13.49	2.4	7.51	8.29	4.76	1.04	3.16	6.57	3.3	2.82	4.91	1.06	2.1	10.7	17.17	12.61
603	chr1	33097766	33098766	-550973	Gm5415	9.02	15.64	-1.11	-0.94	9.02	3.93	3.71	6.78	15.64	7.19	10.2	9.67	2.38	3.11	6.31	2.19	3.3	5.64	9.81	4.24	6.29	13.37	25.14	8.41
8009	chr10	102927868	102928868	100409	Alx1	9.6	35.49	-2.21	-4.78	9.6	2.18	1.46	3.52	35.49	4.79	15.03	8.98	2.38	2.07	2.1	1.09	3.3	0	0	6.35	4.2	38.78	31.27	36.43
25522	chr16	36739237	36740237	45225	Slc15a2	66.15	13.72	1.9	-4.65	66.15	12.83	15.93	12.08	13.72	55.09	61.18	82.17	24.97	10.37	3.16	14.23	11	22.56	9.81	22.23	4.2	20.06	4.29	16.82
90	chr1	9207030	9208030	92347	Sntg1	25.67	6.99	1.46	-1.75	25.67	21.69	12.17	4.8	6.99	27.54	17.71	31.76	28.54	19.71	16.83	15.33	9.9	11.28	4.91	5.29	4.2	4.68	8.58	7.71
54847	chr6	112553202	112554202	-63877	Oxtr	15.19	11.25	0.09	-0.04	15.19	5.07	5.9	4.45	11.25	15.57	18.25	11.74	4.76	5.19	5.26	6.57	5.5	5.64	4.91	4.24	4.2	14.04	9.2	10.51
54225	chr6	89071496	89072496	-24114	4933427D06Rik	18.85	5.05	1.55	-1.38	18.85	11.82	15.1	17.75	5.05	11.98	20.39	24.17	16.65	8.3	10.52	13.14	20.89	11.28	18.4	24.35	10.49	2.01	6.13	7.01
9717	chr11	32324335	32325335	-22976	Sh3pxd2b	15.06	10.06	0.26	-0.13	15.06	11.68	10.66	5.67	10.06	11.98	16.64	16.57	13.08	9.33	12.62	12.04	14.29	5.64	8.59	2.12	6.29	10.03	6.13	14.01
28043	chr17	34079278	34080278	-12601	H2-Oa	12.11	11.23	-0.24	-0.12	12.11	9.13	7.01	8.48	11.23	10.78	9.66	15.88	10.7	10.37	6.31	4.38	11	5.64	8.59	8.47	8.39	4.68	12.88	16.12
39959	chr3	27182584	27183584	80	Nceh1	79.27	55.26	0.15	-0.19	79.27	47.57	41.99	49.83	55.26	85.03	59.57	93.22	65.41	37.34	39.97	36.12	36.29	53.57	36.79	47.65	65.04	56.83	46.6	62.36
12522	chr11	117848518	117849518	-219	Birc5	46.82	49.59	-0.43	-0.66	46.82	34.85	27.33	29.19	49.59	55.09	46.69	38.67	44	33.19	27.35	26.27	37.39	18.33	30.66	27.53	29.37	40.78	53.34	54.65
16338	chr13	24831324	24832324	165	Tdp2	80.63	76.51	-0.29	-0.48	80.63	43.87	51.7	44.7	76.51	102.99	67.08	71.81	59.46	30.08	42.07	59.11	49.48	46.52	33.11	29.65	71.33	91.59	74.19	63.76
41078	chr3	67709006	67710006	126738	Mfsd1	64.2	27.06	0.89	-1.9	64.2	9.53	18.01	29.35	27.06	67.06	60.64	64.91	11.89	8.3	8.41	24.08	8.8	21.15	34.34	24.35	29.37	31.42	19.62	30.13
51676	chr5	139657840	139658840	77993	Micall2	9.15	13.6	-0.95	-0.78	9.15	4.63	7.68	10.58	13.6	7.19	11.27	8.98	2.38	5.19	6.31	6.57	6.6	9.87	15.94	7.41	8.39	12.7	14.1	14.01
29538	chr17	85020158	85021158	-7689	Slc3a1	9.51	5.31	0.5	-0.19	9.51	8.78	8.88	8.3	5.31	8.38	13.95	6.21	10.7	10.37	5.26	6.57	8.8	11.28	4.91	7.41	12.59	0	6.13	9.81
25797	chr16	45723862	45724862	169	Tagln3	53.4	34.16	0.29	-0.32	53.4	26.64	24.35	21.83	34.16	41.92	45.08	73.2	39.25	23.85	16.83	20.8	29.69	22.56	30.66	24.35	10.49	23.4	44.76	34.33
17644	chr13	71458207	71459207	351618	Mir466f-4	16.17	23.89	-0.94	-1.17	16.17	13.65	9.72	7.89	23.89	14.37	18.25	15.88	19.03	11.41	10.52	5.47	11	12.69	11.04	4.24	8.39	28.75	23.3	19.62
30271	chr18	23751867	23752867	34	Mapre2	61.07	65.37	-0.46	-0.87	61.07	35.25	24.74	27.96	65.37	47.9	57.96	77.34	44	22.82	38.92	32.84	13.19	28.2	26.98	27.53	29.37	52.82	71.12	72.17
20061	chr14	47753272	47754272	90016	Ktn1	13.33	5.68	0.74	-0.43	13.33	12.9	12.02	8.84	5.68	8.38	10.2	21.41	17.84	12.45	8.41	10.95	11	14.1	8.59	9.53	8.39	4.68	6.74	5.61
48328	chr5	12301817	12302817	-80849	Sema3d	94.06	22.73	1.69	-6.95	94.06	18.47	22.83	14.5	22.73	101.79	78.89	101.51	26.16	14.52	14.73	17.51	24.19	26.79	31.89	7.41	4.2	22.73	20.23	25.22
29227	chr17	75193435	75194435	15154	Ltbp1	16.52	6.45	1.03	-0.81	16.52	9.28	8.78	11.25	6.45	15.57	13.95	20.03	14.27	7.26	6.31	8.76	7.7	9.87	14.72	14.82	4.2	6.02	4.91	8.41
53740	chr6	70709181	70710181	82494	Rpia	39.5	18.25	0.76	-1	39.5	24.96	22.25	23.97	18.25	43.11	28.44	46.96	32.11	24.89	17.88	24.08	18.69	23.97	17.17	19.06	35.67	21.39	21.46	11.91
27829	chr17	28080174	28081174	-35	Tcp11	26.96	25.2	-0.24	-0.2	26.96	13.23	15.62	21.34	25.2	32.33	25.76	22.79	16.65	7.26	15.78	12.04	16.49	18.33	13.49	19.06	31.47	25.4	26.37	23.82
7145	chr10	77130414	77131414	-17209	Col18a1	20.36	19.42	-0.28	-0.2	20.36	11.39	11.91	8.24	19.42	14.37	27.37	19.33	14.27	6.22	13.67	7.66	15.39	12.69	11.04	5.29	8.39	14.04	23.91	20.32
61385	chr8	67712757	67713757	105038	Psd3	23.55	12.2	0.61	-0.52	23.55	7.69	6.43	8.77	12.2	21.56	16.64	32.45	9.51	8.3	5.26	8.76	7.7	2.82	7.36	8.47	10.49	9.36	15.33	11.91
32651	chr19	15387954	15388954	536168	Psat1	5.17	10.07	-1.21	-0.82	5.17	1.74	3.5	5.9	10.07	4.79	5.9	4.83	0	2.07	3.16	4.38	3.3	2.82	6.13	5.29	6.29	11.37	10.42	8.41
26592	chr16	78636684	78637684	-60496	D16Ertd472e	15.47	14.2	-0.28	-0.17	15.47	8.9	9.98	8.88	14.2	17.96	9.12	19.33	13.08	3.11	10.52	8.76	9.9	11.28	9.81	6.35	10.49	17.38	14.72	10.51
42632	chr3	122462327	122463327	-20742	Bcar3	27.8	23.56	-0.12	-0.08	27.8	12.03	13.68	11.52	23.56	20.36	25.76	37.29	13.08	9.33	13.67	15.33	8.8	16.92	13.49	10.59	10.49	29.42	25.14	16.12
52938	chr6	37377566	37378566	64082	Creb3l2	10.33	3.86	1.07	-0.59	10.33	11.56	13.27	5.38	3.86	9.58	9.66	11.74	19.03	9.33	6.31	10.95	17.59	11.28	9.81	4.24	2.1	1.34	6.74	3.5
16657	chr13	35449845	35450845	-209517	Cdyl	19.64	6.13	1.34	-1.26	19.64	19.08	14.21	14.67	6.13	23.95	12.88	22.1	23.79	15.56	17.88	10.95	17.59	14.1	13.49	11.65	18.88	7.35	6.13	4.9
44960	chr4	49957981	49958981	-112712	Grin3a	12.5	9.88	0.02	-0.01	12.5	8.33	3.03	7.83	9.88	9.58	18.25	9.67	8.32	10.37	6.31	3.28	4.4	1.41	9.81	3.18	10.49	8.69	15.33	5.61
50428	chr5	100091376	100092376	13914	Tmem150cos	28.34	13.35	0.73	-0.67	28.34	12.51	11.75	10.11	13.35	16.77	26.83	41.43	16.65	11.41	9.47	9.85	9.9	15.51	13.49	6.35	10.49	14.04	19.01	7.01
53952	chr6	80401978	80402978	382835	Lrrtm4	7.89	20.61	-1.79	-2.18	7.89	3.02	4.44	2.86	20.61	4.79	6.44	12.43	5.95	2.07	1.05	6.57	1.1	5.64	1.23	1.06	6.29	18.05	31.88	11.91
40441	chr3	41742075	41743075	-40	D3Ertd751e	161.82	143.03	-0.19	-0.43	161.82	90.24	82.91	71.96	143.03	191.61	123.97	169.87	139.14	67.41	64.16	77.72	93.46	77.54	73.59	73.06	69.23	143.74	136.12	149.24
30874	chr18	45789928	45790928	230274	Kcnn2	13.73	5.85	0.94	-0.6	13.73	6.41	6.9	4.45	5.85	9.58	15.03	16.57	11.89	2.07	5.26	6.57	9.9	4.23	4.91	6.35	2.1	6.69	2.45	8.41
55335	chr6	127006461	127007461	-8581	Fgf6	17.48	6.32	1.06	-0.86	17.48	5.13	3.49	7.31	6.32	16.77	17.71	17.95	5.95	2.07	7.36	7.66	0	2.82	6.13	7.41	8.39	2.67	8.58	7.71
5581	chr10	20124916	20125916	-23504	Map7	18.07	14.5	-0.07	-0.03	18.07	11.67	7.89	8.35	14.5	25.15	16.64	12.43	13.08	11.41	10.52	6.57	14.29	2.82	6.13	4.24	14.69	22.06	6.74	14.71
44798	chr4	45270810	45271810	-25858	Trmt10b	10.56	3.3	1.34	-0.79	10.56	9.28	8.73	8.07	3.3	9.58	14.49	7.6	5.95	13.48	8.41	4.38	7.7	14.1	7.36	8.47	8.39	3.34	3.07	3.5
41523	chr3	85378365	85379365	61346	1700036G14Rik	16.09	4.83	1.29	-0.97	16.09	9.95	7.31	6.55	4.83	20.36	8.59	19.33	13.08	5.19	11.57	9.85	2.2	9.87	12.26	5.29	2.1	8.02	3.68	2.8
23596	chr15	76326920	76327920	23	Exosc4	65.22	54.55	-0.11	-0.13	65.22	26.09	25.97	26.02	54.55	77.84	56.35	61.46	33.3	18.67	26.3	19.7	28.59	29.61	30.66	20.12	27.27	61.51	50.28	51.85
11356	chr11	87461440	87462440	34349	Tex14	10.08	13.42	-0.76	-0.54	10.08	8.05	6.48	6.49	13.42	4.79	12.34	13.12	9.51	6.22	8.41	6.57	4.4	8.46	3.68	5.29	10.49	11.37	18.39	10.51
51165	chr5	123720540	123721540	4	Zcchc8	46.64	43.9	-0.26	-0.32	46.64	27.51	22.45	17.24	43.9	51.5	45.62	42.81	42.81	16.59	23.14	30.65	19.79	16.92	8.59	13.76	29.37	37.44	46.6	47.65
20326	chr14	55822951	55823951	-1344	Nfatc4	70.16	84.03	-0.62	-1.75	70.16	26.92	23.72	20.85	84.03	82.63	57.42	70.43	36.87	19.71	24.19	17.51	29.69	23.97	25.76	9.53	27.27	86.91	94.42	70.77
11977	chr11	103142156	103143156	9297	Hexim2	30.08	11.73	1	-1.07	30.08	20.43	14.63	16.43	11.73	47.9	20.93	21.41	22.6	16.59	22.09	12.04	21.99	9.87	13.49	12.71	23.08	13.37	14.1	7.71
7119	chr10	76442332	76443332	80	Pcnt	108.19	100.81	-0.26	-0.54	108.19	63.7	58.75	52.41	100.81	118.56	90.7	115.32	92.76	38.37	59.96	65.68	52.78	57.8	55.19	32.82	69.23	105.63	113.43	83.38
37563	chr2	124931076	124932076	-136551	Slc24a5	16.99	6.89	0.96	-0.75	16.99	4.61	3.71	3.34	6.89	16.77	15.56	18.64	2.38	8.3	3.16	2.19	3.3	5.64	3.68	4.24	2.1	4.01	11.04	5.61
43187	chr3	138741707	138742707	-1	Tspan5	56.27	59.41	-0.42	-0.77	56.27	19.24	17.24	22.04	59.41	50.3	51.52	66.98	27.35	9.33	21.04	16.42	19.79	15.51	20.85	18	27.27	51.48	69.29	57.45
26295	chr16	65664414	65665414	-102217	Chmp2b	21.93	8.69	0.96	-0.82	21.93	6.59	8.41	7.07	8.69	32.33	13.42	20.03	8.32	8.3	3.16	10.95	4.4	9.87	8.59	2.12	10.49	4.01	12.26	9.81
55683	chr6	139577162	139578162	-38653	Pik3c2g	18.24	13.58	0.08	-0.04	18.24	7.27	4.6	7.3	13.58	23.95	10.73	20.03	7.14	3.11	11.57	5.47	5.5	2.82	6.13	5.29	10.49	16.05	13.49	11.21
10425	chr11	57673755	57674755	-24761	4933424L21Rik	6.08	20.75	-2.05	-2.69	6.08	5.32	7.05	5.61	20.75	3.59	9.12	5.52	2.38	6.22	7.36	3.28	6.6	11.28	7.36	3.18	6.29	13.37	20.85	28.03
18882	chr13	113888452	113889452	94444	Arl15	25.91	7.71	1.31	-1.49	25.91	12.12	12.85	10.41	7.71	20.36	21.47	35.91	15.46	10.37	10.52	15.33	17.59	5.64	12.26	10.59	8.39	8.69	6.74	7.71
36376	chr2	78868405	78869405	-142	Ube2e3	112.4	118.74	-0.44	-1.28	112.4	33.51	34.17	41.59	118.74	138.92	91.24	107.03	45.19	29.04	26.3	35.03	40.68	26.79	41.7	22.23	60.84	116.33	135.5	104.4
53154	chr6	45974177	45975177	914616	Cntnap2	33.21	16.03	0.71	-0.78	33.21	8.29	7.47	10.7	16.03	27.54	27.91	44.19	7.14	9.33	8.41	8.76	6.6	7.05	18.4	7.41	6.29	23.4	13.49	11.21
47707	chr4	144949164	144950164	56527	Dhrs3	142.56	64.42	0.79	-3.18	142.56	71.43	64.57	50.83	64.42	167.66	119.14	140.87	103.47	47.71	63.11	56.92	64.88	71.9	50.29	47.65	54.55	62.84	68.06	62.36
41361	chr3	81148683	81149683	112767	Pdgfc	17.98	12.25	0.21	-0.11	17.98	7.45	10.5	9.94	12.25	20.36	17.71	15.88	11.89	3.11	7.36	12.04	11	8.46	9.81	9.53	10.49	6.02	20.23	10.51
39202	chr2	171790316	171791316	171983	1700028P15Rik	15.43	11.9	0	0	15.43	5.56	5.32	5.14	11.9	13.17	14.49	18.64	8.32	4.15	4.21	9.85	3.3	2.82	4.91	2.12	8.39	8.02	17.17	10.51
19677	chr14	29562460	29563460	158904	Cacna2d3	8.1	9.9	-0.67	-0.4	8.1	4.46	5.38	2.23	9.9	7.19	10.2	6.91	7.14	5.19	1.05	4.38	3.3	8.46	2.45	4.24	0	8.69	9.81	11.21
57797	chr7	80245860	80246860	-16	Ttll13	63.19	58.72	-0.25	-0.38	63.19	37.79	31.76	31.5	58.72	73.05	48.84	67.67	64.22	20.74	28.4	28.46	32.99	33.84	35.57	21.18	37.76	56.16	62.54	57.45
63822	chr9	25519069	25520069	37972	Eepd1	19.3	12.6	0.2	-0.12	19.3	7.06	8.05	8.5	12.6	19.16	16.64	22.1	10.7	3.11	7.36	6.57	7.7	9.87	8.59	12.71	4.2	18.72	8.58	10.51
36438	chr2	80434990	80435990	11906	Frzb	10.77	21.52	-1.32	-1.35	10.77	7.05	7.31	5.73	21.52	8.38	12.88	11.05	10.7	5.19	5.26	6.57	5.5	9.87	9.81	5.29	2.1	7.35	36.18	21.02
12842	chr12	8803148	8804148	32252	Sdc1	21.65	7.79	1.14	-1.11	21.65	6.85	11.23	8.08	7.79	19.16	20.93	24.86	5.95	8.3	6.31	14.23	11	8.46	7.36	10.59	6.29	9.36	9.81	4.2
62304	chr8	100416480	100417480	1000306	A330008L17Rik	6.97	15.12	-1.5	-1.53	6.97	2.98	0.73	2.58	15.12	4.79	6.44	9.67	4.76	2.07	2.1	1.09	1.1	0	2.45	3.18	2.1	14.71	15.94	14.71
18238	chr13	95999045	96000045	-107623	Iqgap2	44.78	16.31	1.11	-1.89	44.78	22.08	23.4	21.41	16.31	53.89	30.05	50.41	38.06	14.52	13.67	26.27	24.19	19.74	22.08	19.06	23.08	15.38	15.33	18.22
65133	chr9	70986911	70987911	-35190	Lipc	16.39	8.76	0.55	-0.33	16.39	8.39	9.98	15.21	8.76	8.38	21.47	19.33	9.51	8.3	7.36	10.95	7.7	11.28	17.17	13.76	14.69	7.35	9.81	9.11
39306	chr2	174075737	174076737	-814	Stx16	82.74	97.66	-0.6	-1.95	82.74	54.02	55.58	58.89	97.66	95.81	68.16	84.24	78.49	40.45	43.13	45.98	51.68	69.08	42.93	56.12	77.62	90.92	106.07	95.99
39042	chr2	167661190	167662190	-146	Tmem189	38.35	40.3	-0.42	-0.57	38.35	15.5	15.15	18.01	40.3	46.71	33.81	34.53	21.41	11.41	13.67	16.42	12.1	16.92	17.17	15.88	20.98	39.44	42.92	38.54
39162	chr2	170520185	170521185	-8758	Gm16796	17.88	11.83	0.24	-0.13	17.88	5.9	6.73	5.55	11.83	20.36	18.78	14.5	8.32	6.22	3.16	10.95	2.2	7.05	6.13	4.24	6.29	16.05	6.13	13.31
23578	chr15	75968663	75969663	40	Zfp707	38.48	30.19	0	0	38.48	22.12	21.78	20.01	30.19	43.11	34.35	37.98	21.41	19.71	25.24	19.7	23.09	22.56	22.08	21.18	16.78	21.39	25.75	43.44
35672	chr2	56454430	56455430	-330881	Mir195b	22.72	17.86	-0.01	-0.01	22.72	6.11	8.52	5.15	17.86	22.75	19.86	25.55	4.76	6.22	7.36	5.47	8.8	11.28	4.91	6.35	4.2	16.71	16.55	20.32
2783	chr1	121327433	121328433	91	Insig2	113.76	90.13	-0.03	-0.03	113.76	60.22	62.06	40.36	90.13	122.15	90.7	128.44	93.95	42.52	44.18	52.54	65.97	67.67	36.79	38.12	46.16	68.86	109.75	91.79
53574	chr6	61067387	61068387	-112438	Ccser1	34.48	24.66	0.16	-0.11	34.48	9.52	10.92	8.38	24.66	22.75	36.49	44.19	11.89	12.45	4.21	14.23	14.29	4.23	6.13	12.71	6.29	11.37	37.4	25.22
14021	chr12	58803781	58804781	207736	Sec23a	35.42	22.24	0.28	-0.22	35.42	25.28	30.4	36.64	22.24	29.94	20.39	55.93	39.25	16.59	19.99	37.22	28.59	25.38	39.25	41.29	29.37	24.07	25.14	17.52
58159	chr7	95132819	95133819	-1037925	Tenm4	4.48	19.78	-2.44	-2.91	4.48	2.88	2.04	2.28	19.78	0	3.76	9.67	2.38	4.15	2.1	2.19	1.1	2.82	3.68	1.06	2.1	19.39	24.53	15.41
13138	chr12	24696793	24697793	-10961	Rrm2	5.63	8.41	-0.92	-0.52	5.63	14.21	11.23	11.93	8.41	4.79	5.9	6.21	23.79	6.22	12.62	15.33	9.9	8.46	7.36	11.65	16.78	10.7	6.13	8.41
7735	chr10	94129298	94130298	-18133	Nr2c1	7.03	16.98	-1.57	-1.77	7.03	5.02	4.76	4.63	16.98	5.99	7.51	7.6	3.57	6.22	5.26	4.38	9.9	0	1.23	8.47	4.2	15.38	15.94	19.62
43391	chr3	145602139	145603139	26423	Znhit6	19.43	19.24	-0.33	-0.24	19.43	21.66	15.78	19.13	19.24	21.56	13.95	22.79	27.35	16.59	21.04	14.23	17.59	15.51	18.4	20.12	18.88	22.06	15.33	20.32
15102	chr12	99351428	99352428	98146	Foxn3	11.82	15.84	-0.78	-0.67	11.82	6.75	9.15	9.08	15.84	14.37	10.73	10.36	3.57	11.41	5.26	6.57	11	9.87	6.13	14.82	6.29	15.38	15.33	16.82
1997	chr1	80715472	80716472	42581	Dock10	14.91	31.15	-1.44	-2.7	14.91	10.03	5.64	6.84	31.15	14.37	14.49	15.88	15.46	7.26	7.36	5.47	4.4	7.05	11.04	5.29	4.2	29.42	32.5	31.53
63625	chr9	18385560	18386560	-24	Naalad2	20.85	22.19	-0.43	-0.38	20.85	7.55	7.47	7.83	22.19	20.36	16.64	25.55	14.27	3.11	5.26	5.47	9.9	7.05	9.81	5.29	8.39	18.05	28.2	20.32
52161	chr6	5297893	5298893	-20	Pon2	51.74	48.72	-0.28	-0.38	51.74	22.69	23.82	24.4	48.72	50.3	43.47	61.46	35.68	14.52	17.88	28.46	27.49	15.51	33.11	25.41	14.69	51.48	48.44	46.24
19703	chr14	30591095	30592095	18715	Prkcd	12.47	9.18	0.1	-0.04	12.47	11.46	11.81	8.59	9.18	9.58	16.1	11.74	16.65	9.33	8.41	9.85	14.29	11.28	11.04	6.35	8.39	10.03	9.81	7.71
59088	chr7	126700805	126701805	2915	Coro1a	12.48	19.02	-1.01	-1.1	12.48	10.69	13.32	15.21	19.02	11.98	12.34	13.12	14.27	5.19	12.62	9.85	13.19	16.92	17.17	13.76	14.69	22.73	19.62	14.71
55134	chr6	121173248	121174248	-9919	Pex26	20.95	15.73	0.05	-0.03	20.95	15.04	13.85	11.16	15.73	14.37	18.78	29.69	19.03	13.48	12.62	10.95	16.49	14.1	6.13	8.47	18.88	15.38	12.88	18.92
33745	chr19	47699429	47700429	-7887	Col17a1	16.64	10.53	0.28	-0.14	16.64	16.94	15.41	15.79	10.53	19.16	20.39	10.36	22.6	13.48	14.73	14.23	16.49	15.51	7.36	16.94	23.08	4.01	7.97	19.62
25149	chr16	25041703	25042703	-17436	A230028O05Rik	39.51	32.3	-0.07	-0.05	39.51	32.65	28.36	21.59	32.3	32.33	36.49	49.72	49.95	26.97	21.04	28.46	24.19	32.43	18.4	23.29	23.08	34.1	26.37	36.43
2077	chr1	83745730	83746730	-338030	Sphkap	10.07	12.16	-0.59	-0.38	10.07	8.14	7.89	7.48	12.16	9.58	7.51	13.12	11.89	6.22	6.31	8.76	12.1	2.82	9.81	6.35	6.29	15.38	9.2	11.91
65760	chr9	93863296	93864296	674285	1190002N15Rik	3.76	10.04	-1.81	-1.3	3.76	2.49	4.34	1.58	10.04	2.4	2.68	6.21	1.19	3.11	3.16	1.09	7.7	4.23	3.68	1.06	0	6.02	12.88	11.21
42156	chr3	104026467	104027467	-58651	Phtf1os	23.65	5.89	1.69	-1.81	23.65	8.44	9.4	7.09	5.89	27.54	22	21.41	10.7	8.3	6.31	13.14	6.6	8.46	8.59	8.47	4.2	8.02	1.23	8.41
24676	chr16	8768748	8769748	-30906	Usp7	27.58	19.4	0.13	-0.08	27.58	13.66	11.55	11.53	19.4	34.73	15.56	32.45	19.03	10.37	11.57	6.57	15.39	12.69	13.49	12.71	8.39	26.74	15.33	16.12
66060	chr9	104100997	104101997	25146	Ackr4	21.79	10.53	0.68	-0.59	21.79	7.49	4.18	3.34	10.53	21.56	18.25	25.55	13.08	6.22	3.16	1.09	4.4	7.05	3.68	4.24	2.1	10.03	11.04	10.51
57374	chr7	65884982	65885982	23346	Pcsk6	11.37	7.47	0.24	-0.1	11.37	7.16	7.05	7.61	7.47	7.19	14.49	12.43	4.76	8.3	8.41	5.47	4.4	11.28	12.26	8.47	2.1	9.36	6.74	6.31
10573	chr11	61950314	61951314	-5949	Specc1	6.14	12	-1.29	-1.05	6.14	7.17	3.24	5.9	12	5.99	4.83	7.6	4.76	6.22	10.52	3.28	2.2	4.23	6.13	3.18	8.39	12.7	13.49	9.81
39086	chr2	168601341	168602341	-184	Nfatc2	42.04	74.79	-1.19	-4.25	42.04	13.09	10.5	19.35	74.79	55.09	31.66	39.36	13.08	8.3	17.88	9.85	13.19	8.46	8.59	18	31.47	66.19	79.71	78.47
1552	chr1	65925253	65926253	-769	Crygf	77.66	46.25	0.38	-0.64	77.66	27.37	28.68	9.83	46.25	79.04	62.79	91.15	39.25	19.71	23.14	19.7	29.69	36.66	7.36	11.65	10.49	45.46	38.63	54.65
41450	chr3	83562003	83563003	11615	1700028M03Rik	19.1	9.44	0.6	-0.45	19.1	10.76	4.85	7.65	9.44	17.96	14.49	24.86	16.65	9.33	6.31	9.85	3.3	1.41	6.13	4.24	12.59	8.69	9.81	9.81
67157	chrX	51680024	51681024	-47	Hs6st2	23.73	17.19	0.12	-0.07	23.73	9.88	16.62	15.21	17.19	29.94	24.69	16.57	11.89	9.33	8.41	9.85	23.09	16.92	17.17	13.76	14.69	14.71	16.55	20.32
30068	chr18	14091182	14092182	-118949	Zfp521	17.17	16.47	-0.25	-0.14	17.17	8.29	8.83	6.2	16.47	7.19	23.61	20.72	15.46	5.19	4.21	12.04	8.8	5.64	4.91	5.29	8.39	10.7	18.39	20.32
24459	chr15	102325754	102326754	138	Pfdn5	27.22	25.39	-0.29	-0.25	27.22	12.21	12.17	16.46	25.39	38.32	19.86	23.48	17.84	10.37	8.41	10.95	14.29	11.28	14.72	3.18	31.47	24.74	22.69	28.73
61586	chr8	72443337	72444337	-43	1700030K09Rik	50.84	58.8	-0.56	-1.15	50.84	42.7	41.64	45.99	58.8	41.92	47.76	62.84	57.08	36.3	34.71	38.31	52.78	33.84	38.02	32.82	67.13	54.82	61.31	60.26
43266	chr3	142098887	142099887	70038	Bmpr1b	9.64	20.22	-1.42	-0.46	9.64	5.47	2.56	1.99	20.22	0	12.34	16.57	5.95	3.11	7.36	2.19	5.5	0	4.91	1.06	0	17.38	25.75	17.52
23195	chr15	58746633	58747633	76294	Tmem65	16.65	4.49	1.44	-1.11	16.65	13.26	12.28	8.95	4.49	11.98	14.49	23.48	17.84	10.37	11.57	8.76	15.39	12.69	11.04	9.53	6.29	6.02	6.74	0.7
63004	chr8	121377472	121378472	163982	1700018B08Rik	39.72	23.96	0.37	-0.4	39.72	7.95	9.87	13.97	23.96	41.92	41.32	35.91	7.14	8.3	8.41	9.85	9.9	9.87	13.49	11.65	16.78	28.08	22.07	21.72
42008	chr3	99204823	99205823	-5870	Mir6481	9.46	3.02	1.33	-0.74	9.46	3.98	9.25	6.15	3.02	9.58	9.12	9.67	3.57	4.15	4.21	5.47	11	11.28	3.68	8.47	6.29	2.67	4.29	2.1
37200	chr2	113647866	113648866	-36724	Fmn1	13.35	13.53	-0.33	-0.2	13.35	7.62	11.29	7.6	13.53	15.57	8.59	15.88	7.14	3.11	12.62	8.76	11	14.1	12.26	4.24	6.29	14.04	15.33	11.21
60398	chr8	28299213	28300213	-214860	Gm8096	12.17	23.2	-1.25	-1.61	12.17	5.91	6.64	3.97	23.2	11.98	15.56	8.98	8.32	4.15	5.26	5.47	8.8	5.64	2.45	1.06	8.39	20.72	30.66	18.22
23040	chr15	53641698	53642698	-27919	Mir28c	13.19	2.71	1.97	-1.34	13.19	10.02	13.69	3.46	2.71	15.57	10.2	13.81	15.46	8.3	6.31	8.76	15.39	16.92	6.13	4.24	0	2.01	6.13	0
9612	chr11	29373386	29374386	-286	Ccdc88a	132.74	137.48	-0.41	-1.45	132.74	85.82	70.42	91.27	137.48	132.93	117.53	147.77	132.01	53.93	71.53	63.49	75.87	71.9	111.61	72	90.21	137.05	142.25	133.13
35681	chr2	57187955	57188955	6624	4930555B11Rik	31.06	10.81	1.12	-1.28	31.06	17.59	17.44	12.99	10.81	16.77	27.37	49.03	29.73	8.3	14.73	21.89	12.1	18.33	14.72	11.65	12.59	10.7	9.81	11.91
61006	chr8	48764851	48765851	-90661	Tenm3	26.41	7.45	1.47	-1.66	26.41	10.74	11.07	6.96	7.45	34.73	18.25	26.24	15.46	5.19	11.57	13.14	8.8	11.28	13.49	5.29	2.1	12.03	6.13	4.2
52677	chr6	28980699	28981699	-41420	Mir129-1	33.93	37.21	-0.51	-0.73	33.93	17.13	18.5	19	37.21	37.13	27.37	37.29	27.35	10.37	13.67	16.42	26.39	12.69	23.3	14.82	18.88	40.78	38.63	32.23
32678	chr19	15997851	15998851	13276	C130060C02Rik	14.59	17.13	-0.61	-0.52	14.59	6.61	6.58	6.43	17.13	16.77	11.81	15.19	8.32	5.19	6.31	4.38	5.5	9.87	9.81	5.29	4.2	18.72	16.55	16.12
45619	chr4	76142352	76143352	201391	Ptprd	9.84	2.85	1.37	-0.78	9.84	1.74	4.7	3.16	2.85	9.58	7.51	12.43	0	2.07	3.16	7.66	2.2	4.23	7.36	2.12	0	2.67	3.07	2.8
4292	chr1	172126246	172127246	-9	Pex19	39.76	38.25	-0.3	-0.36	39.76	20.36	18.86	21.06	38.25	37.13	43.47	38.67	29.73	15.56	15.78	16.42	17.59	22.56	14.72	21.18	27.27	43.46	35.56	35.73
2664	chr1	116243515	116244515	558878	Cntnap5a	25.4	7.21	1.49	-1.77	25.4	23.93	12.23	5.9	7.21	29.94	19.32	26.93	40.44	15.56	15.78	8.76	11	16.92	6.13	3.18	8.39	4.01	9.2	8.41
41972	chr3	98197753	98198753	-23903	Reg4	37.94	24.97	0.27	-0.24	37.94	46.92	38.97	15.27	24.97	37.13	35.96	40.74	67.79	45.63	27.35	33.93	40.68	42.29	11.04	18	16.78	30.08	29.43	15.41
8081	chr10	105840899	105841899	-19	Mettl25	142.23	142.32	-0.37	-1.21	142.23	118.72	105.62	108.15	142.32	160.48	119.14	147.08	171.25	89.19	95.72	113.84	109.96	93.05	105.48	84.7	134.27	148.42	149.61	128.92
48785	chr5	30774668	30775668	-39473	Mapre3	18.34	24.32	-0.77	-0.85	18.34	8.7	8.78	9.64	24.32	11.98	16.1	26.93	8.32	7.26	10.52	7.66	8.8	9.87	11.04	5.29	12.59	20.06	31.88	21.02
36657	chr2	91921540	91922540	-149	Chrm4	30.58	24.64	-0.03	-0.02	30.58	20.26	19.16	22.21	24.64	29.94	30.05	31.76	27.35	15.56	17.88	26.27	14.29	16.92	17.17	15.88	33.57	29.42	22.07	22.42
61016	chr8	49260498	49261498	-586308	Tenm3	14.32	27.51	-1.29	-1.93	14.32	7.99	4.54	5.9	27.51	11.98	12.34	18.64	8.32	8.3	7.36	5.47	1.1	7.05	13.49	2.12	2.1	21.39	38.01	23.12
55117	chr6	120835847	120836847	117	Bcl2l13	73.23	61.08	-0.1	-0.11	73.23	41.92	37.7	29.37	61.08	86.23	59.57	73.89	63.03	25.93	36.81	38.31	29.69	45.11	26.98	31.76	29.37	66.85	72.96	43.44
34371	chr2	8975386	8976386	-213629	1700061F12Rik	57.96	12.08	1.85	-4.35	57.96	7.66	7.84	7.85	12.08	64.67	38.1	71.12	8.32	5.19	9.47	6.57	9.9	7.05	9.81	9.53	4.2	18.72	9.81	7.71
57870	chr7	82192585	82193585	18289	Sh3gl3	18	6.4	1.12	-0.83	18	10	6.27	8.59	6.4	9.58	11.27	33.15	5.95	10.37	13.67	6.57	6.6	5.64	11.04	4.24	10.49	5.35	6.13	7.71
38848	chr2	163409686	163410686	9284	Oser1	22.6	3.02	2.57	-2.87	22.6	13.01	6.37	5.86	3.02	27.54	20.93	19.33	20.22	8.3	10.52	7.66	4.4	7.05	4.91	8.47	4.2	1.34	4.91	2.8
13855	chr12	52726356	52727356	27473	Akap6	18.63	5.88	1.28	-1.1	18.63	7.41	6.78	7.61	5.88	13.17	17.17	25.55	10.7	3.11	8.41	15.33	2.2	2.82	4.91	9.53	8.39	2.67	7.97	7.01
52646	chr6	28243566	28244566	17535	Zfp800	34.24	9.66	1.46	-2.13	34.24	9.54	9.09	5.51	9.66	39.52	30.05	33.15	11.89	6.22	10.52	15.33	7.7	4.23	4.91	7.41	4.2	9.36	4.91	14.71
20397	chr14	58321579	58322579	249393	Fgf9	16.64	4.78	1.37	-1.09	16.64	6.96	5.38	5.03	4.78	19.16	20.39	10.36	8.32	5.19	7.36	3.28	4.4	8.46	9.81	5.29	0	6.02	5.52	2.8
48646	chr5	24205008	24206008	40545	Nupl2	13.5	7.91	0.36	-0.17	13.5	3.58	1.46	2.74	7.91	17.96	8.05	14.5	2.38	5.19	3.16	1.09	3.3	0	6.13	0	2.1	5.35	3.68	14.71
46623	chr4	110287089	110288089	-62	Elavl4	26.96	11.43	0.89	-0.97	26.96	12.72	16.98	14.97	11.43	23.95	23.08	33.84	13.08	11.41	13.67	16.42	17.59	16.92	19.62	12.71	12.59	12.03	11.04	11.21
2269	chr1	90283033	90284033	79553	Ackr3	33.9	15.44	0.78	-0.96	33.9	11.11	10.14	8.6	15.44	34.73	28.98	37.98	16.65	10.37	6.31	7.66	14.29	8.46	11.04	8.47	6.29	20.06	12.26	14.01
35901	chr2	64483934	64484934	-386396	Fign	5.25	11.97	-1.57	-1.25	5.25	3.29	2.77	2.58	11.97	2.4	6.44	6.91	3.57	1.04	5.26	1.09	4.4	2.82	2.45	3.18	2.1	9.36	15.33	11.21
45025	chr4	53415546	53416546	-24367	Slc44a1	4.15	15.18	-2.16	-2.28	4.15	5.17	5.9	4.79	15.18	4.79	2.15	5.52	7.14	4.15	4.21	7.66	4.4	5.64	4.91	1.06	8.39	11.37	15.94	18.22
25848	chr16	47921600	47922600	236399	6430553K19Rik	19.11	12.09	0.27	-0.16	19.11	5.56	4.96	6.56	12.09	10.78	23.08	23.48	8.32	4.15	4.21	6.57	5.5	2.82	4.91	8.47	6.29	14.71	11.04	10.51
6481	chr10	56745064	56746064	313583	Gm36595	26.05	6.26	1.67	-2.03	26.05	11.06	10.6	3.58	6.26	25.15	19.86	33.15	15.46	12.45	5.26	14.23	7.7	9.87	1.23	7.41	2.1	8.02	7.97	2.8
1478	chr1	63614262	63615262	72165	Dytn	20.99	10.83	0.65	-0.5	20.99	8.65	7.21	9.88	10.83	21.56	24.15	17.26	7.14	9.33	9.47	8.76	4.4	8.46	8.59	8.47	12.59	5.35	15.94	11.21
36684	chr2	92482135	92483135	-22117	Slc35c1	15.05	7.98	0.52	-0.31	15.05	12.81	6.42	11.82	7.98	19.16	8.05	17.95	15.46	12.45	10.52	12.04	4.4	2.82	12.26	14.82	8.39	8.69	6.13	9.11
51537	chr5	136198474	136199474	-20	Prkrip1	36.52	41.42	-0.52	-0.75	36.52	24.43	24.34	18.08	41.42	35.93	41.86	31.76	27.35	24.89	21.04	28.46	21.99	22.56	11.04	20.12	23.08	36.77	54.57	32.93
15564	chr12	112145006	112146006	-702	Kif26a	28.9	25.93	-0.21	-0.17	28.9	13.5	18.07	21.74	25.93	26.35	27.91	32.45	15.46	14.52	10.52	20.8	16.49	16.92	22.08	13.76	29.37	25.4	35.56	16.82
54981	chr6	116228472	116229472	20939	Washc2	4.61	8.57	-1.24	-0.76	4.61	6.96	6.79	5.08	8.57	2.4	5.9	5.52	8.32	5.19	7.36	6.57	1.1	12.69	3.68	3.18	8.39	8.02	8.58	9.11
23469	chr15	70920574	70921574	806764	Fam135b	9.84	9.76	-0.35	-0.18	9.84	6.92	4.91	5.32	9.76	9.58	12.34	7.6	7.14	4.15	9.47	3.28	4.4	7.05	8.59	3.18	4.2	12.03	6.74	10.51
12299	chr11	113050372	113051372	150966	2610035D17Rik	22.94	11.43	0.68	-0.57	22.94	4.38	7.11	10.01	11.43	33.53	16.64	18.64	4.76	2.07	6.31	5.47	8.8	7.05	11.04	12.71	6.29	13.37	10.42	10.51
10255	chr11	51470356	51471356	-113901	Phykpl	15.09	22.81	-0.95	-1.13	15.09	7.35	7.88	8.02	22.81	11.98	13.95	19.33	9.51	5.19	7.36	8.76	2.2	12.69	6.13	9.53	8.39	19.39	29.43	19.62
28166	chr17	36836766	36837766	120	Trim26	128.22	111.61	-0.17	-0.33	128.22	92.69	59.03	72.81	111.61	152.09	94.46	138.1	147.47	63.27	67.32	53.64	67.07	56.39	77.27	65.64	75.53	109.64	115.88	109.3
66509	chr9	118606302	118607302	93	Itga9	33.61	27.9	-0.07	-0.05	33.61	13.63	12.07	13.97	27.9	38.32	34.88	27.62	17.84	7.26	15.78	12.04	14.29	9.87	13.49	9.53	18.88	31.42	31.27	21.02
15050	chr12	97888510	97889510	370449	Galc	37.51	19.98	0.56	-0.63	37.51	15.2	10.08	9.65	19.98	33.53	32.74	46.27	22.6	10.37	12.62	8.76	8.8	12.69	11.04	9.53	8.39	12.03	27.59	20.32
5826	chr10	27591109	27592109	25333	Lama2	16.64	29.45	-1.17	-1.76	16.64	11.74	8.67	5.49	29.45	9.58	18.25	22.1	14.27	6.22	14.73	7.66	9.9	8.46	4.91	3.18	8.39	22.73	36.18	29.43
68427	chrY	90767428	90768428	-12878	G530011O06Rik	9.17	11.29	-0.65	-0.38	9.17	0.35	0	1.05	11.29	16.77	5.9	4.83	0	0	1.05	0	0	0	0	1.06	2.1	13.37	8.58	11.91
62564	chr8	108351486	108352486	232691	Lncbate1	17.94	3.03	2.23	-0.87	17.94	10.99	7.94	9.24	3.03	10.78	20.93	22.1	13.08	7.26	12.62	8.76	6.6	8.46	9.81	9.53	8.39	0.67	0	8.41
19626	chr14	27237334	27238334	-176	Arhgef3	23.83	13.81	0.39	-0.3	23.83	10.82	13.11	9.59	13.81	23.95	17.17	30.38	17.84	8.3	6.31	10.95	14.29	14.1	9.81	8.47	10.49	14.71	14.1	12.61
58162	chr7	95350001	95351001	-820743	Tenm4	26.43	14.44	0.51	-0.43	26.43	9.65	8.78	5.73	14.44	16.77	25.22	37.29	14.27	4.15	10.52	6.57	9.9	9.87	9.81	3.18	4.2	17.38	14.72	11.21
4790	chr1	187832625	187833625	-164702	Esrrg	14.25	3.07	2.08	-1.58	14.25	6.3	4.13	6.71	3.07	14.37	16.64	11.74	9.51	5.19	4.21	6.57	4.4	1.41	8.59	1.06	10.49	5.35	2.45	1.4
3652	chr1	154928739	154929739	154025	Gm9530	11.53	30.19	-1.72	-3.02	11.53	5.32	4.81	5.73	30.19	9.58	13.95	11.05	2.38	6.22	7.36	4.38	4.4	5.64	9.81	3.18	4.2	18.05	36.79	35.73
57742	chr7	78895379	78896379	-48	Aen	76.2	72.6	-0.3	-0.52	76.2	57.99	51.92	44.85	72.6	63.47	71.91	93.22	80.87	37.34	55.75	53.64	52.78	49.34	35.57	40.23	58.74	66.19	71.74	79.88
13526	chr12	37141877	37142877	33837	Meox2	143.5	39.14	1.49	-8.06	143.5	131.31	124.95	30.65	39.14	153.29	107.34	169.87	197.42	88.16	108.34	112.75	125.35	136.75	30.66	46.59	14.69	36.77	33.72	46.94
35300	chr2	38668879	38669879	-25473	Psmb7	18.17	10.91	0.34	-0.21	18.17	11.63	12.43	17.31	10.91	20.36	13.42	20.72	11.89	9.33	13.67	14.23	13.19	9.87	17.17	15.88	18.88	8.02	8.58	16.12
56932	chr7	45215452	45216452	199	Tead2	32.2	28.58	-0.15	-0.12	32.2	13.23	17.76	14.42	28.58	28.74	40.25	27.62	16.65	8.3	14.73	20.8	19.79	12.69	8.59	7.41	27.27	29.42	32.5	23.82
6453	chr10	55923613	55924613	-182804	Msl3l2	11.46	6.24	0.54	-0.26	11.46	3.23	3.13	1.05	6.24	14.37	9.66	10.36	2.38	4.15	3.16	3.28	3.3	2.82	0	1.06	2.1	11.37	2.45	4.9
60085	chr8	16620818	16621818	-452480	Mir3106	18.93	2.03	2.86	-2.5	18.93	3.53	3.24	3.74	2.03	26.35	11.81	18.64	1.19	5.19	4.21	3.28	2.2	4.23	4.91	2.12	4.2	4.68	0	1.4
31446	chr18	64750633	64751633	-90133	Atp8b1	24.65	10.59	0.84	-0.82	24.65	16.49	10.03	17.2	10.59	23.95	18.25	31.76	20.22	14.52	14.73	7.66	15.39	7.05	14.72	18	18.88	9.36	9.81	12.61
8383	chr10	116473443	116474443	-420	Kcnmb4	32.26	37.92	-0.6	-0.9	32.26	15.68	13.33	15.44	37.92	25.15	34.35	37.29	26.16	11.41	9.47	10.95	21.99	7.05	14.72	14.82	16.78	40.11	38.63	35.03
30223	chr18	21734955	21735955	-83087	Klhl14	40.57	29.01	0.1	-0.08	40.57	10.47	10.55	5.61	29.01	44.31	26.3	51.1	17.84	6.22	7.36	7.66	9.9	14.1	7.36	3.18	6.29	33.43	26.98	26.63
20798	chr14	72506127	72507127	203376	Fndc3a	16.77	15.04	-0.21	-0.12	16.77	11.08	9.24	9.13	15.04	11.98	20.39	17.95	15.46	7.26	10.52	9.85	6.6	11.28	7.36	9.53	10.49	10.7	23.91	10.51
726	chr1	36709218	36710218	207	Actr1b	60.76	60.12	-0.35	-0.56	60.76	42.36	41.11	40.99	60.12	79.04	44.54	58.69	57.08	33.19	36.81	38.31	38.49	46.52	35.57	37.06	50.35	61.51	65.61	53.25
59410	chr7	136735776	136736776	-25672	Gm6249	11.13	28.38	-1.68	-3.02	11.13	6.35	2.92	5.62	28.38	11.98	9.66	11.74	10.7	4.15	4.21	5.47	3.3	0	7.36	5.29	4.2	23.4	28.82	32.93
55156	chr6	121837181	121838181	-860	Mug1	31.26	9.83	1.27	-1.73	31.26	22.45	23.61	8.66	9.83	32.33	24.15	37.29	38.06	10.37	18.93	26.27	21.99	22.56	12.26	9.53	4.2	8.02	11.65	9.81
53561	chr6	59497769	59498769	-71979	Gprin3	17.93	11.3	0.3	-0.18	17.93	4.86	6.84	4.97	11.3	14.37	16.64	22.79	8.32	3.11	3.16	8.76	3.3	8.46	8.59	2.12	4.2	14.71	7.97	11.21
7179	chr10	77969383	77970383	-11	Trpm2	11.43	8.13	0.14	-0.06	11.43	5.52	7.21	6.67	8.13	8.38	10.73	15.19	7.14	2.07	7.36	8.76	4.4	8.46	7.36	6.35	6.29	10.03	7.36	7.01
37989	chr2	136977688	136978688	78837	Slx4ip	13.91	50.49	-2.21	-7.02	13.91	6.11	4.13	5.44	50.49	11.98	11.81	17.95	4.76	7.26	6.31	5.47	5.5	1.41	3.68	6.35	6.29	41.45	49.05	60.96
22905	chr15	43757934	43758934	111595	Tmem74	6.96	10.44	-0.91	-0.6	6.96	5.61	4.6	8.07	10.44	8.38	6.98	5.52	9.51	3.11	4.21	5.47	5.5	2.82	7.36	6.35	10.49	8.02	13.49	9.81
33975	chr19	55923720	55924720	28899	Tcf7l2	29.69	13.97	0.75	-0.84	29.69	9.42	6.37	5.79	13.97	33.53	27.91	27.62	17.84	7.26	3.16	5.47	6.6	7.05	3.68	5.29	8.39	13.37	15.94	12.61
31717	chr18	73493812	73494812	-78393	Mex3c	20.42	3.71	2.1	-2.21	20.42	9.01	8.67	11.35	3.71	22.75	15.03	23.48	7.14	7.26	12.62	12.04	5.5	8.46	9.81	13.76	10.49	3.34	4.29	3.5
67053	chrX	39198898	39199898	-146868	Cypt15	7.88	13.95	-1.15	-0.99	7.88	10.76	3.24	1.82	13.95	5.99	10.73	6.91	16.65	10.37	5.26	1.09	4.4	4.23	1.23	2.12	2.1	14.71	15.94	11.21
22243	chr15	12394594	12395594	73598	Golph3	26.36	6.83	1.63	-2.03	26.36	7.94	9.04	3.75	6.83	21.56	20.93	36.6	7.14	9.33	7.36	7.66	11	8.46	4.91	4.24	2.1	5.35	6.74	8.41
33537	chr19	42478038	42479038	-40267	R3hcc1l	12.44	3.52	1.41	-0.95	12.44	11.12	11.91	11.81	3.52	13.17	14.49	9.67	8.32	14.52	10.52	10.95	12.1	12.69	12.26	8.47	14.69	2.67	3.68	4.2
13917	chr12	54738364	54739364	-42970	Eapp	8.16	9.02	-0.53	-0.27	8.16	6.4	5.28	6.6	9.02	8.38	6.44	9.67	11.89	4.15	3.16	2.19	6.6	7.05	6.13	5.29	8.39	5.35	9.81	11.91
63437	chr9	11432409	11433409	-528134	Cntn5	9.84	14.94	-0.99	-0.87	9.84	8.54	6.74	2.87	14.94	7.19	11.27	11.05	13.08	5.19	7.36	4.38	8.8	7.05	1.23	3.18	4.2	18.72	13.49	12.61
29561	chr17	86034435	86035435	110240	Srbd1	17.62	14.79	-0.1	-0.06	17.62	8.42	8.05	3.69	14.79	15.57	14.49	22.79	10.7	11.41	3.16	5.47	8.8	9.87	3.68	5.29	2.1	16.71	12.26	15.41
32531	chr19	10602482	10603482	1276	Tkfc	36.93	30.25	-0.07	-0.05	36.93	16.58	21.98	21.35	30.25	26.35	40.25	44.19	22.6	15.56	11.57	26.27	14.29	25.38	20.85	20.12	23.08	20.06	39.85	30.83
22529	chr15	30747296	30748296	-291330	4930430F21Rik	10.2	4.77	0.63	-0.28	10.2	2.09	1.93	0	4.77	17.96	6.44	6.21	0	2.07	4.21	1.09	3.3	1.41	0	0	0	6.69	5.52	2.1
68177	chrX	157612505	157613505	-14290	Mbtps2	22.85	14.84	0.22	-0.14	22.85	14.55	12.9	9.29	14.84	26.35	11.81	30.38	23.79	9.33	10.52	16.42	11	11.28	11.04	6.35	10.49	10.7	23.3	10.51
27324	chr17	9031432	9032432	43599	1700010I14Rik	12.25	12.68	-0.4	-0.23	12.25	7.34	9.4	9.82	12.68	15.57	8.05	13.12	9.51	7.26	5.26	9.85	9.9	8.46	7.36	7.41	14.69	6.69	15.94	15.41
27049	chr16	95585138	95586138	955	Erg	24.73	23.59	-0.28	-0.23	24.73	14.1	15.21	13.92	23.59	20.36	24.15	29.69	21.41	11.41	9.47	13.14	19.79	12.69	19.62	13.76	8.39	23.4	21.46	25.92
21106	chr14	80845422	80846422	845620	Olfm4	31.44	28.34	-0.23	-0.18	31.44	20.21	17.97	22.03	28.34	19.16	26.83	48.34	34.49	10.37	15.78	14.23	14.29	25.38	20.85	15.88	29.37	26.07	23.91	35.03
58247	chr7	97580018	97581018	622	Rsf1	53.32	51.92	-0.32	-0.45	53.32	29.25	33.53	26.26	51.92	57.48	47.23	55.24	42.81	20.74	24.19	43.79	28.59	28.2	28.21	23.29	27.27	41.45	68.06	46.24
44701	chr4	41645216	41646216	-5414	Enho	9.66	5.19	0.61	-0.29	9.66	9.14	6.11	9.76	5.19	7.19	10.73	11.05	10.7	7.26	9.47	6.57	3.3	8.46	6.13	8.47	14.69	4.01	7.36	4.2
40630	chr3	52602870	52603870	86406	Gm30173	28.87	6.42	1.83	-2.5	28.87	11.59	7.68	5.04	6.42	23.95	24.69	37.98	10.7	8.3	15.78	8.76	4.4	9.87	2.45	8.47	4.2	4.01	6.13	9.11
7699	chr10	92906856	92907856	174240	Cfap54	13.29	5.84	0.89	-0.57	13.29	2.58	5.48	7.03	5.84	15.57	13.95	10.36	3.57	2.07	2.1	9.85	6.6	0	7.36	9.53	4.2	5.35	7.97	4.2
24241	chr15	97054480	97055480	976	Slc38a4	17.72	19.16	-0.47	-0.35	17.72	10.93	14.31	9.13	19.16	23.95	20.93	8.29	11.89	9.33	11.57	13.14	14.29	15.51	7.36	9.53	10.49	23.4	16.55	17.52
15133	chr12	99957743	99958743	-6256	Kcnk13	15.24	7.09	0.75	-0.48	15.24	10.79	5.43	3.34	7.09	15.57	8.05	22.1	8.32	10.37	13.67	6.57	5.5	4.23	3.68	4.24	2.1	6.02	6.13	9.11
14601	chr12	80925582	80926582	-1635	1700052I22Rik	18.45	5.5	1.32	-1.19	18.45	8.52	10.76	6.37	5.5	20.36	12.88	22.1	13.08	9.33	3.16	13.14	12.1	7.05	8.59	2.12	8.39	4.68	5.52	6.31
49024	chr5	38741054	38742054	-56728	Zfp518b	13.74	7.63	0.5	-0.26	13.74	5.81	6.16	5.73	7.63	20.36	13.95	6.91	5.95	6.22	5.26	7.66	6.6	4.23	9.81	3.18	4.2	2.67	10.42	9.81
20421	chr14	59478483	59479483	32	Cab39l	24.19	10.14	0.89	-0.84	24.19	11.53	8.41	6.38	10.14	31.14	14.49	26.93	17.84	5.19	11.57	9.85	5.5	9.87	8.59	6.35	4.2	6.69	10.42	13.31
44335	chr4	23601415	23602415	-894536	Mms22l	27.8	22.9	-0.08	-0.05	27.8	11.46	12.38	7.62	22.9	26.35	32.2	24.86	16.65	9.33	8.41	13.14	9.9	14.1	4.91	11.65	6.29	16.05	19.01	33.63
12785	chr12	5375091	5376091	91	Klhl29	64.67	67.69	-0.43	-0.85	64.67	34.21	26.12	31.88	67.69	70.66	46.69	76.65	45.19	30.08	27.35	24.08	27.49	26.79	35.57	28.59	31.47	68.19	61.31	73.57
12078	chr11	106255503	106256503	81	Ftsj3	48.25	60.4	-0.67	-1.45	48.25	23.01	25.34	23.16	60.4	55.09	50.98	38.67	26.16	18.67	24.19	27.37	27.49	21.15	22.08	22.23	25.18	58.83	70.51	51.85
6205	chr10	42987315	42988315	3347	Gm5079	16.96	14.25	-0.16	-0.09	16.96	14.84	15.58	7.78	14.25	14.37	12.34	24.17	22.6	11.41	10.52	10.95	23.09	12.69	8.59	6.35	8.39	16.05	14.1	12.61
56175	chr7	12749101	12750101	-16496	Vmn2r56	10.3	14.21	-0.84	-0.68	10.3	11.28	8.82	10.05	14.21	13.17	8.05	9.67	11.89	10.37	11.57	15.33	5.5	5.64	12.26	7.41	10.49	16.71	14.72	11.21
33386	chr19	37692598	37693598	-4710	Cyp26a1	15.87	20.68	-0.73	-0.69	15.87	12.26	9.35	12.46	20.68	13.17	22	12.43	10.7	15.56	10.52	7.66	7.7	12.69	11.04	13.76	12.59	16.05	26.37	19.62
19802	chr14	33684200	33685200	95430	Ptpn20	13.2	2.91	1.75	-1.21	13.2	5.7	10.61	10.43	2.91	14.37	10.73	14.5	3.57	9.33	4.21	9.85	12.1	9.87	12.26	14.82	4.2	0.67	2.45	5.61
21366	chr14	100009451	100010451	139845	Klf12	16.02	9.2	0.43	-0.25	16.02	10.13	9.72	6.9	9.2	19.16	17.17	11.74	9.51	11.41	9.47	8.76	7.7	12.69	4.91	5.29	10.49	12.7	8.58	6.31
40982	chr3	64191719	64192719	-54739	Vmn2r2	89.75	18.11	1.93	-7.64	89.75	55.7	35.67	10.36	18.11	98.2	72.99	98.05	92.76	24.89	49.44	35.03	29.69	42.29	11.04	11.65	8.39	12.03	22.69	19.62
9449	chr11	21827444	21828444	173707	Otx1	13.7	5.44	0.9	-0.55	13.7	5.07	5.64	5.73	5.44	7.19	11.81	22.1	4.76	4.15	6.31	5.47	4.4	7.05	2.45	6.35	8.39	6.69	6.13	3.5
67459	chrX	87702816	87703816	412307	Il1rapl1	10.76	30.44	-1.81	-3.06	10.76	3.78	4.8	2.98	30.44	3.59	15.56	13.12	7.14	1.04	3.16	5.47	3.3	5.64	3.68	1.06	4.2	24.74	29.43	37.14
46196	chr4	98243207	98244207	139558	Tm2d1	18.16	16.53	-0.23	-0.15	18.16	12.42	11.6	13.86	16.53	21.56	12.88	20.03	14.27	9.33	13.67	13.14	13.19	8.46	11.04	13.76	16.78	14.04	15.94	19.62
5141	chr10	4899156	4900156	169407	Syne1	5.84	20.22	-2.11	-2.9	5.84	5.81	4.49	5.05	20.22	4.79	3.76	8.98	5.95	6.22	5.26	6.57	5.5	1.41	2.45	10.59	2.1	17.38	20.85	22.42
46280	chr4	100547573	100548573	69206	Ube2u	7.32	12.05	-1.07	-0.8	7.32	5.46	5.33	8.48	12.05	8.38	8.05	5.52	5.95	6.22	4.21	5.47	7.7	2.82	8.59	8.47	8.39	16.71	11.04	8.41
10362	chr11	54866052	54867052	169	Hint1	53.96	55.82	-0.4	-0.58	53.96	22.39	15.51	15.03	55.82	69.46	50.98	41.43	28.54	20.74	17.88	18.61	11	16.92	20.85	11.65	12.59	42.12	74.19	51.15
15004	chr12	95458113	95459113	-233613	Flrt2	16	2.47	2.23	-1.88	16	13	10.29	4.38	2.47	13.17	18.25	16.57	20.22	11.41	7.36	12.04	13.19	5.64	3.68	3.18	6.29	2.67	1.23	3.5
952	chr1	43445730	43446730	479	Nck2	69.16	59.26	-0.14	-0.18	69.16	24.94	22.15	31.45	59.26	68.26	66.01	73.2	30.92	19.71	24.19	20.8	23.09	22.56	26.98	25.41	41.96	58.83	60.09	58.86
4498	chr1	179560416	179561416	14387	Cnst	6.95	23.7	-2.05	-0.84	6.95	3.22	5.8	5.32	23.7	0	13.95	6.91	2.38	5.19	2.1	4.38	8.8	4.23	1.23	4.24	10.49	24.07	23.91	23.12
9636	chr11	30056990	30057990	-31457	Eml6	12.93	10.48	-0.02	-0.01	12.93	12.47	9.72	8.54	10.48	7.19	15.03	16.57	15.46	9.33	12.62	6.57	9.9	12.69	9.81	9.53	6.29	9.36	12.26	9.81
37670	chr2	127788402	127789402	-11	Nphp1	29.17	26.53	-0.21	-0.17	29.17	11.77	12.7	15.08	26.53	31.14	27.37	29	15.46	9.33	10.52	9.85	19.79	8.46	14.72	9.53	20.98	15.38	31.27	32.93
36042	chr2	69053988	69054988	-81312	Nostrin	12.21	43.61	-2.22	-6.33	12.21	7.53	6.9	6.14	43.61	10.78	13.42	12.43	14.27	7.26	1.05	8.76	7.7	4.23	11.04	5.29	2.1	42.79	50.89	37.14
66447	chr9	116511187	116512187	322507	Gm4668	15.3	9.32	0.3	-0.16	15.3	6.01	4.91	9.13	9.32	20.36	9.66	15.88	2.38	8.3	7.36	3.28	4.4	7.05	7.36	11.65	8.39	10.7	11.65	5.61
56234	chr7	16491450	16492450	-15170	Npas1	13.12	13.43	-0.36	-0.22	13.12	9.15	8.1	10.06	13.43	17.96	9.66	11.74	10.7	5.19	11.57	9.85	8.8	5.64	12.26	9.53	8.39	9.36	14.1	16.82
51730	chr5	141188760	141189760	-52274	Sdk1	2.61	18.97	-3.2	-3.97	2.61	2.87	4.44	1.47	18.97	2.4	2.68	2.76	2.38	5.19	1.05	4.38	3.3	5.64	1.23	3.18	0	16.71	12.88	27.33
20859	chr14	74529077	74530077	-111297	Htr2a	2.45	18.04	-3.32	-3.72	2.45	3.68	2.3	2.64	18.04	0	3.22	4.14	4.76	2.07	4.21	2.19	3.3	1.41	3.68	4.24	0	12.7	28.82	12.61
42629	chr3	122419382	122420382	125	Bcar3	64.97	55.74	-0.14	-0.18	64.97	24.16	30.18	26.49	55.74	67.06	57.42	70.43	28.54	17.63	26.3	35.03	23.09	32.43	25.76	22.23	31.47	50.81	58.25	58.16
61592	chr8	72642605	72643605	-3606	Nwd1	10.2	12.36	-0.59	-0.36	10.2	6.64	5.12	6.56	12.36	15.57	10.2	4.83	1.19	15.56	3.16	7.66	7.7	0	4.91	8.47	6.29	8.69	17.17	11.21
45468	chr4	69362304	69363304	-408407	Brinp1	4.52	22.78	-2.69	-3.65	4.52	3.86	2.19	1.82	22.78	1.2	2.68	9.67	1.19	9.33	1.05	5.47	1.1	0	1.23	4.24	0	26.74	12.88	28.73
20224	chr14	53976827	53977827	276602	Dad1	24.61	11.46	0.73	-0.69	24.61	11.86	10.35	9.35	11.46	22.75	24.15	26.93	17.84	9.33	8.41	6.57	13.19	11.28	12.26	5.29	10.49	8.02	11.65	14.71
60694	chr8	39297772	39298772	292	Gm6213	33.68	34.93	-0.41	-0.51	33.68	8.09	14.68	5.55	34.93	35.93	25.76	39.36	10.7	6.22	7.36	15.33	13.19	15.51	6.13	4.24	6.29	39.44	33.11	32.23
54737	chr6	107751861	107752861	222635	Lrrn1	44.16	13.51	1.33	-2.35	44.16	26.16	30.5	17.08	13.51	51.5	35.42	45.57	44	15.56	18.93	36.12	28.59	26.79	26.98	13.76	10.49	18.72	9.2	12.61
51364	chr5	131142176	131143176	164846	Wbscr17	16.48	5.31	1.24	-1	16.48	13.17	8.2	8.24	5.31	19.16	12.34	17.95	23.79	5.19	10.52	7.66	9.9	7.05	3.68	6.35	14.69	7.35	3.68	4.9
45538	chr4	72068656	72069656	131737	Tle1	9.53	17.47	-1.2	-1.26	9.53	2.98	3.24	4.91	17.47	7.19	9.66	11.74	4.76	2.07	2.1	2.19	3.3	4.23	7.36	3.18	4.2	16.05	15.33	21.02
5949	chr10	32077372	32078372	-468147	Rnf217	7.38	9.37	-0.66	-0.36	7.38	5.03	5.07	3.8	9.37	4.79	6.98	10.36	3.57	4.15	7.36	4.38	6.6	4.23	6.13	3.18	2.1	11.37	10.42	6.31
30496	chr18	33292596	33293596	-79234	Stard4	68.34	41.46	0.36	-0.57	68.34	32.38	22.98	14.27	41.46	74.25	56.89	73.89	42.81	24.89	29.45	21.89	23.09	23.97	4.91	14.82	23.08	45.46	41.08	37.84
64823	chr9	60187091	60188091	-46371	Thsd4	39.12	14.27	1.13	-1.79	39.12	20.41	19.64	6.78	14.27	46.71	30.59	40.05	30.92	13.48	16.83	17.51	23.09	18.33	9.81	4.24	6.29	11.37	15.33	16.12
37528	chr2	123311921	123312921	530422	Sqor	22.71	29.95	-0.74	-1.03	22.71	11.81	11.65	14.28	29.95	21.56	23.08	23.48	16.65	11.41	7.36	10.95	9.9	14.1	12.26	18	12.59	31.42	32.5	25.92
12525	chr11	117912356	117913356	-39330	Tha1	13.69	12.03	-0.17	-0.09	13.69	6.21	9.4	8.18	12.03	16.77	9.12	15.19	7.14	5.19	6.31	9.85	9.9	8.46	9.81	4.24	10.49	7.35	14.72	14.01
12492	chr11	117134940	117135940	20268	Sec14l1	28.47	16.21	0.45	-0.4	28.47	11.8	11.18	6.55	16.21	32.33	26.83	26.24	16.65	12.45	6.31	8.76	12.1	12.69	12.26	5.29	2.1	10.7	19.01	18.92
8729	chr10	125844964	125845964	-120755	Lrig3	31.75	56.36	-1.16	-3.02	31.75	16.38	13.48	7.9	56.36	27.54	40.79	26.93	26.16	11.41	11.57	12.04	14.29	14.1	11.04	8.47	4.2	52.15	54.57	62.36
15385	chr12	107789321	107790321	-54333	4930465M20Rik	13.06	6	0.79	-0.44	13.06	5.51	5.96	9.89	6	16.77	8.59	13.81	7.14	6.22	3.16	7.66	8.8	1.41	8.59	10.59	10.49	8.02	8.58	1.4
65327	chr9	77556233	77557233	-11881	Lrrc1	12.81	5.51	0.84	-0.53	12.81	6.99	7.32	5.98	5.51	15.57	11.81	11.05	9.51	7.26	4.21	4.38	7.7	9.87	7.36	8.47	2.1	6.02	4.91	5.61
15036	chr12	97061146	97062146	-1014424	1700019M22Rik	467.7	381.75	-0.08	-0.06	467.7	3.72	2.3	2.16	381.75	691.01	310.2	401.88	5.95	3.11	2.1	4.38	1.1	1.41	1.23	1.06	4.2	387.09	353.17	404.99
3948	chr1	162792291	162793291	19758	Fmo4	11.14	9.4	-0.1	-0.04	11.14	5.81	7.48	10.01	9.4	13.17	11.27	8.98	5.95	6.22	5.26	4.38	11	7.05	11.04	10.59	8.39	9.36	15.33	3.5
66617	chr9	121313722	121314722	16720	Trak1	36.34	46.25	-0.7	-1.33	36.34	15.91	16.09	15.6	46.25	41.92	28.44	38.67	23.79	17.63	6.31	14.23	14.29	19.74	11.04	10.59	25.18	40.11	50.28	48.35
55009	chr6	117159925	117160925	-8110	Cxcl12	21.11	51.08	-1.62	-4.22	21.11	13.16	12.43	7.43	51.08	19.16	24.15	20.03	15.46	12.45	11.57	15.33	12.1	9.87	1.23	8.47	12.59	31.42	54.57	67.26
30975	chr18	49530904	49531904	8115	1700044K03Rik	11.07	3.67	1.29	-0.79	11.07	4.82	5.8	5.9	3.67	9.58	13.95	9.67	7.14	3.11	4.21	5.47	7.7	4.23	6.13	5.29	6.29	4.01	4.91	2.1
55240	chr6	124839313	124840313	462	Gnb3	29.07	11.47	0.98	-1.13	29.07	15.85	15.25	12.35	11.47	31.14	18.78	37.29	21.41	10.37	15.78	13.14	14.29	18.33	15.94	14.82	6.29	9.36	11.04	14.01
51273	chr5	127119423	127120423	-50642	4930572K03Rik	4.98	10.8	-1.33	-0.94	4.98	2.33	2.77	0.41	10.8	3.59	8.59	2.76	5.95	1.04	0	4.38	1.1	2.82	1.23	0	0	11.37	9.81	11.21
31745	chr18	74003868	74004868	-13539	D730045A05Rik	31.34	12.34	1.03	-1.21	31.34	17.86	19.75	14.15	12.34	44.31	28.98	20.72	28.54	14.52	10.52	15.33	24.19	19.74	9.81	13.76	18.88	15.38	10.42	11.21
24375	chr15	100113047	100114047	-40849	Dip2b	10.76	10.95	-0.41	-0.21	10.76	15.37	10.86	13.52	10.95	9.58	12.34	10.36	17.84	9.33	18.93	15.33	8.8	8.46	11.04	14.82	14.69	18.05	4.29	10.51
32209	chr18	90509588	90510588	-66	Tmx3	158.31	156.93	-0.36	-1.13	158.31	89.27	82.74	81.4	156.93	161.67	116.46	196.8	140.33	59.12	68.37	82.1	85.77	80.36	80.95	70.94	92.31	169.14	159.42	142.24
49858	chr5	74535087	74536087	105	Fip1l1	62.48	67.75	-0.47	-1	62.48	32.72	37.25	38.49	67.75	59.88	68.16	59.39	51.14	21.78	25.24	33.93	43.98	33.84	19.62	41.29	54.55	62.84	71.74	68.67
25903	chr16	50045597	50046597	26755	Gm4827	47.94	28.03	0.39	-0.48	47.94	15.89	20.21	21.75	28.03	49.1	33.27	61.46	22.6	12.45	12.62	22.99	16.49	21.15	22.08	18	25.18	28.75	29.43	25.92
50184	chr5	90855268	90856268	-35477	Cxcl1	111.68	25.25	1.78	-8.32	111.68	68.7	46.14	10.47	25.25	123.35	80.5	131.2	105.85	50.82	49.44	29.56	53.88	54.98	13.49	9.53	8.39	25.4	25.14	25.22
24952	chr16	18543183	18544183	43286	Tbx1	17.17	5.62	1.16	-0.93	17.17	12.41	13.01	13.15	5.62	20.36	16.64	14.5	14.27	12.45	10.52	8.76	17.59	12.69	3.68	10.59	25.18	2.67	8.58	5.61
7163	chr10	77434123	77435123	16247	Gm17769	10.96	14.99	-0.86	-0.72	10.96	9.05	10.4	8.55	14.99	13.17	5.9	13.81	8.32	8.3	10.52	5.47	18.69	7.05	9.81	11.65	4.2	20.72	11.65	12.61
64479	chr9	47893816	47894816	-76108	Gm10677	32.48	13.33	0.91	-1	32.48	19.06	16.72	15.32	13.33	41.92	23.08	32.45	23.79	19.71	13.67	12.04	19.79	18.33	19.62	13.76	12.59	16.71	18.39	4.9
40634	chr3	52840237	52841237	86929	Gm20750	3.73	20.29	-2.71	-3.9	3.73	4.51	3.76	3.05	20.29	3.59	4.83	2.76	8.32	4.15	1.05	5.47	4.4	1.41	4.91	4.24	0	16.71	24.53	19.62
22652	chr15	35265687	35266687	-29925	Osr2	44.7	9.87	1.84	-3.72	44.7	8.1	11.97	9.31	9.87	49.1	31.13	53.86	10.7	5.19	8.41	8.76	18.69	8.46	11.04	10.59	6.29	7.35	11.04	11.21
62292	chr8	99443143	99444143	26969	A330008L17Rik	11.85	14.08	-0.63	-0.47	11.85	5.42	6	7.08	14.08	14.37	8.05	13.12	4.76	5.19	6.31	7.66	3.3	7.05	8.59	6.35	6.29	12.03	14.1	16.12
28098	chr17	35185649	35186649	2291	Lst1	14.21	13.69	-0.27	-0.15	14.21	6.7	5.07	9.84	13.69	15.57	9.12	17.95	2.38	10.37	7.36	5.47	5.5	4.23	7.36	13.76	8.39	9.36	13.49	18.22
15488	chr12	110498058	110499058	12819	Ppp2r5c	25.01	6.51	1.55	-1.68	25.01	12.65	10.35	7.67	6.51	39.52	18.25	17.26	20.22	10.37	7.36	8.76	11	11.28	6.13	10.59	6.29	5.35	8.58	5.61
32261	chr19	4268585	4269585	148	Ssh3	32.39	20.45	0.3	-0.25	32.39	16.52	19.85	25.05	20.45	37.13	33.81	26.24	21.41	18.67	9.47	19.7	18.69	21.15	24.53	27.53	23.08	12.03	22.69	26.63
40948	chr3	63323852	63324852	28257	Mme	13.36	30.45	-1.55	-2.89	13.36	12.39	10.5	5.69	30.45	13.17	9.66	17.26	14.27	16.59	6.31	12.04	11	8.46	8.59	8.47	0	29.42	27.59	34.33
58083	chr7	90886824	90887824	-203462	Dlg2	70.59	59.17	-0.1	-0.1	70.59	39.84	35.2	27.68	59.17	49.1	70.84	91.84	63.03	22.82	33.66	31.74	32.99	40.88	28.21	29.65	25.18	53.48	63.77	60.26
65171	chr9	72169476	72170476	-58157	Tcf12	15.76	19.57	-0.69	-0.66	15.76	7.3	8.2	5.44	19.57	14.37	12.88	20.03	8.32	6.22	7.36	7.66	9.9	7.05	11.04	3.18	2.1	18.05	24.53	16.12
64199	chr9	39508708	39509708	2510	Olfr957	11.35	15.01	-0.76	-0.62	11.35	5.2	6.63	5.08	15.01	9.58	8.59	15.88	8.32	5.19	2.1	8.76	5.5	5.64	3.68	3.18	8.39	10.7	19.62	14.71
34288	chr2	6164298	6165298	-28453	A230108P19Rik	28.23	31.26	-0.49	-0.55	28.23	15.79	11.18	7.08	31.26	33.53	31.13	20.03	28.54	7.26	11.57	12.04	8.8	12.69	8.59	6.35	6.29	24.07	31.88	37.84
47602	chr4	141147590	141148590	168	Fbxo42	50.28	61.09	-0.62	-1.15	50.28	27.58	24.23	20.76	61.09	50.3	61.18	39.36	45.19	21.78	15.78	28.46	23.09	21.15	15.94	19.06	27.27	42.79	76.03	64.46
35630	chr2	53070317	53071317	120370	Prpf40a	18.43	29.49	-1.05	-1.5	18.43	22.6	21.52	12.1	29.49	19.16	11.27	24.86	42.81	16.59	8.41	21.89	18.69	23.97	11.04	8.47	16.78	23.4	25.14	39.94
34183	chr2	3512243	3513243	71	Hspa14	154.92	134.31	-0.16	-0.34	154.92	112.91	111.92	86.5	134.31	184.43	122.9	157.44	165.31	82.97	90.46	112.75	98.96	124.06	84.63	80.47	94.41	132.37	146.54	124.02
48247	chr5	7276355	7277355	-27309	Tex47	244.93	188.4	0	0	244.93	2.18	3.39	3.22	188.4	359.28	169.05	206.47	2.38	3.11	1.05	5.47	3.3	1.41	1.23	4.24	4.2	185.86	174.75	204.59
41875	chr3	95871015	95872015	-1	Mrps21	26.47	25.44	-0.29	-0.25	26.47	22	10.87	13.92	25.44	29.94	27.37	22.1	27.35	19.71	18.93	10.95	13.19	8.46	12.26	14.82	14.69	17.38	28.82	30.13
15636	chr12	116047321	116048321	97	Zfp386	121.8	118.18	-0.32	-0.85	121.8	90.25	88.07	70.05	118.18	140.12	98.21	127.06	130.82	71.56	68.37	86.48	84.67	93.05	78.49	56.12	75.53	122.34	125.69	106.5
32718	chr19	17318322	17319322	20683	Gcnt1	37.23	6.66	2.11	-3.48	37.23	7.7	6.11	4.74	6.66	49.1	27.37	35.22	9.51	6.22	7.36	5.47	4.4	8.46	3.68	4.24	6.29	3.34	6.13	10.51
61763	chr8	79829819	79830819	118470	Anapc10	20.31	12.91	0.32	-0.19	20.31	10.12	11.44	4.16	12.91	29.94	12.34	18.64	9.51	13.48	7.36	8.76	14.29	11.28	6.13	6.35	0	14.04	18.39	6.31
46931	chr4	122837720	122838720	1993	Ppt1	20.66	7.84	1.02	-0.9	20.66	27.99	19.54	21	7.84	15.57	18.78	27.62	46.38	19.71	17.88	19.7	21.99	16.92	20.85	21.18	20.98	10.03	3.68	9.81
11722	chr11	97468589	97469589	18929	Arhgap23	12.8	14.23	-0.54	-0.37	12.8	10.92	10.5	15.3	14.23	7.19	13.95	17.26	11.89	11.41	9.47	10.95	12.1	8.46	19.62	7.41	18.88	16.05	14.72	11.91
61505	chr8	70630393	70631393	1202	Gdf15	25.13	32.29	-0.71	-0.99	25.13	23.48	23.15	23.91	32.29	25.15	24.69	25.55	29.73	22.82	17.88	20.8	27.49	21.15	23.3	19.06	29.37	38.11	34.95	23.82
33009	chr19	26135245	26136245	463334	Dmrt2	58.43	18.05	1.33	-3.04	58.43	9.04	10.55	7.73	18.05	47.9	49.37	78.03	16.65	4.15	6.31	15.33	12.1	4.23	14.72	8.47	0	19.39	16.55	18.22
41572	chr3	86976246	86977246	-9840	Cd1d2	10.16	10.85	-0.51	-0.3	10.16	5.76	5.28	6.48	10.85	14.37	6.44	9.67	4.76	7.26	5.26	2.19	6.6	7.05	3.68	3.18	12.59	11.37	8.58	12.61
19183	chr14	11154902	11155902	6633	Fhit	27.53	8.61	1.3	-1.57	27.53	12.97	11.29	5.21	8.61	26.35	23.08	33.15	19.03	6.22	13.67	8.76	11	14.1	6.13	7.41	2.1	7.35	12.88	5.61
61601	chr8	72954700	72955700	-61312	Mir28b	10.48	16.92	-1.01	-0.99	10.48	18.18	7.67	4.33	16.92	9.58	8.05	13.81	19.03	16.59	18.93	9.85	3.3	9.87	2.45	6.35	4.2	15.38	17.17	18.22
17301	chr13	57449936	57450936	457896	Spock1	17.9	12.21	0.21	-0.12	17.9	7.94	10.76	6.96	12.21	23.95	11.81	17.95	7.14	10.37	6.31	10.95	14.29	7.05	6.13	8.47	6.29	12.03	9.2	15.41
13131	chr12	24498185	24499185	104	Taf1b	27.09	20.8	0.03	-0.02	27.09	19.73	15.15	15.12	20.8	32.33	22	26.93	32.11	18.67	8.41	16.42	12.1	16.92	23.3	5.29	16.78	15.38	23.91	23.12
2104	chr1	85096893	85097893	12460	A530032D15Rik	17.13	14.87	-0.14	-0.07	17.13	2.18	1.83	1.12	14.87	25.15	9.66	16.57	2.38	3.11	1.05	3.28	2.2	0	1.23	2.12	0	17.38	10.42	16.82
10582	chr11	62280787	62281787	108	Zswim7	68.79	70.82	-0.4	-0.81	68.79	24.78	25.38	32.48	70.82	65.87	59.03	81.48	35.68	17.63	21.04	26.27	23.09	26.79	34.34	16.94	46.16	70.2	83.39	58.86
62000	chr8	87861226	87862226	-57287	Zfp423	13.71	35.61	-1.72	-3.86	13.71	20.17	11.34	6.55	35.61	11.98	13.95	15.19	24.97	15.56	19.99	10.95	13.19	9.87	4.91	6.35	8.39	33.43	40.47	32.93
55796	chr6	142945953	142946953	17999	St8sia1	14.02	6.5	0.71	-0.45	14.02	9.1	6.95	5.62	6.5	14.37	11.81	15.88	9.51	7.26	10.52	5.47	5.5	9.87	7.36	5.29	4.2	6.02	8.58	4.9
24630	chr16	7212450	7213450	143115	Rbfox1	13.01	5.76	0.87	-0.56	13.01	8.49	5.54	7.2	5.76	9.58	12.88	16.57	11.89	6.22	7.36	1.09	9.9	5.64	3.68	9.53	8.39	5.35	4.91	7.01
2126	chr1	85933228	85934228	5245	4933407L21Rik	86.3	28.2	1.24	-3.74	86.3	81.11	76.18	44.71	28.2	100.6	59.57	98.74	118.93	53.93	70.47	52.54	85.77	90.23	46.61	47.65	39.86	29.42	35.56	19.62
10758	chr11	68901195	68902195	106	Gm15772	32.86	46.25	-0.84	-1.67	32.86	20.71	17.07	18.02	46.25	29.94	37.57	31.07	21.41	20.74	19.99	19.7	13.19	18.33	17.17	18	18.88	50.81	46.6	41.34
4221	chr1	170697627	170698627	53595	Olfml2b	19.49	15.2	0.01	0	19.49	13.61	15.21	7.79	15.2	20.36	18.78	19.33	17.84	9.33	13.67	12.04	20.89	12.69	8.59	10.59	4.2	11.37	10.42	23.82
49253	chr5	48184333	48185333	-39109	Mir218-1	34.04	6.02	2.07	-3.27	34.04	7.4	9.88	4.28	6.02	39.52	22.54	40.05	10.7	5.19	6.31	7.66	12.1	9.87	8.59	4.24	0	6.69	8.58	2.8
25075	chr16	23060492	23061492	2692	Kng1	45.33	10.04	1.8	-3.41	45.33	10.08	14.21	5.57	10.04	62.27	34.35	39.36	8.32	11.41	10.52	14.23	14.29	14.1	6.13	8.47	2.1	11.37	6.13	12.61
65013	chr9	66157599	66158599	-127	Dapk2	17.07	24.32	-0.88	-1.1	17.07	10.82	11.08	9.95	24.32	16.77	12.34	22.1	17.84	8.3	6.31	7.66	14.29	11.28	9.81	11.65	8.39	20.06	26.98	25.92
29880	chr18	7979277	7980277	110064	Wac	18.23	10.64	0.44	-0.27	18.23	8.7	7.16	7.39	10.64	23.95	15.56	15.19	8.32	6.22	11.57	8.76	9.9	2.82	7.36	12.71	2.1	4.68	20.23	7.01
59690	chr7	145221924	145222924	-14305	1810010D01Rik	5.81	11.92	-1.46	-1.13	5.81	20.33	14.94	21.15	11.92	2.4	5.37	9.67	20.22	18.67	22.09	13.14	17.59	14.1	9.81	15.88	37.76	16.05	9.2	10.51
21848	chr14	121225449	121226449	-22757	B930095G15Rik	13.27	23.39	-1.15	-1.46	13.27	19.21	17.81	12.86	23.39	9.58	15.03	15.19	27.35	15.56	14.73	19.7	15.39	18.33	12.26	9.53	16.78	23.4	30.66	16.12
20504	chr14	61681828	61682828	45	Dleu2	65.43	62.05	-0.29	-0.48	65.43	28.24	26.22	22.7	62.05	73.05	59.03	64.22	44	21.78	18.93	25.18	25.29	28.2	19.62	23.29	25.18	63.51	63.77	58.86
41808	chr3	93607450	93608450	44736	Tdpoz2	9.34	16.1	-1.12	-1.02	9.34	7	6.9	10.23	16.1	4.79	8.05	15.19	9.51	6.22	5.26	7.66	8.8	4.23	1.23	10.59	18.88	19.39	13.49	15.41
5130	chr10	4530518	4531518	21146	Ccdc170	23.33	10.51	0.82	-0.79	23.33	5.07	9.2	10.93	10.51	22.75	23.08	24.17	4.76	4.15	6.31	10.95	11	5.64	15.94	8.47	8.39	11.37	11.04	9.11
14108	chr12	67326040	67327040	-103991	Mdga2	92.84	15.94	2.17	-9.13	92.84	38.31	51.82	31.31	15.94	95.81	75.67	107.03	44	41.49	29.45	53.64	53.88	47.93	38.02	34.94	20.98	12.7	14.1	21.02
25998	chr16	52930508	52931508	-115264	4930404A05Rik	14.5	3.48	1.76	-1.32	14.5	5.12	5.75	4.4	3.48	15.57	8.59	19.33	5.95	4.15	5.26	3.28	5.5	8.46	3.68	7.41	2.1	5.35	3.68	1.4
6243	chr10	44003433	44004433	913	Crybg1	26.35	28.68	-0.47	-0.48	26.35	14.69	16.4	21.93	28.68	19.16	29.52	30.38	27.35	8.3	8.41	13.14	12.1	23.97	25.76	19.06	20.98	21.39	38.01	26.63
46229	chr4	98923444	98924444	134	Usp1	108.15	114.76	-0.45	-1.17	108.15	62.38	62.79	63.41	114.76	144.91	84.26	95.29	95.14	38.37	53.64	63.49	67.07	57.8	56.42	62.47	71.33	98.94	122.02	123.32
13975	chr12	56987734	56988734	172409	Slc25a21	15.56	3.59	1.83	-1.45	15.56	6.6	5.06	7.09	3.59	19.16	12.34	15.19	8.32	7.26	4.21	7.66	3.3	4.23	8.59	8.47	4.2	5.35	1.23	4.2
8349	chr10	115520443	115521443	-49043	A930009A15Rik	53.25	16.95	1.28	-2.69	53.25	29.39	31.81	19.19	16.95	56.29	41.32	62.15	46.38	19.71	22.09	28.46	27.49	39.47	12.26	22.23	23.08	12.03	22.69	16.12
64192	chr9	37783347	37784347	11210	Olfr875	6.31	11.24	-1.21	-0.93	6.31	9.44	11.97	4.27	11.24	7.19	4.83	6.91	9.51	8.3	10.52	6.57	11	18.33	1.23	5.29	6.29	10.7	10.42	12.61
65512	chr9	83977290	83978290	29009	Bckdhb	10.8	5.4	0.65	-0.34	10.8	9.29	7.63	8.3	5.4	10.78	11.27	10.36	14.27	5.19	8.41	8.76	9.9	4.23	4.91	5.29	14.69	5.35	7.36	3.5
27426	chr17	12740816	12741816	5	Airn	27.39	32.72	-0.59	-0.74	27.39	22.09	17.98	18.71	32.72	29.94	32.2	20.03	29.73	18.67	17.88	13.14	25.29	15.51	17.17	15.88	23.08	33.43	32.5	32.23
54672	chr6	103697756	103698756	187380	Chl1	16.46	2.66	2.45	-2.09	16.46	6.85	7.41	7.36	2.66	15.57	14.49	19.33	5.95	8.3	6.31	8.76	2.2	11.28	7.36	4.24	10.49	1.34	2.45	4.2
48948	chr5	35990725	35991725	97906	Afap1	22.91	9.38	0.94	-0.92	22.91	6.89	5.75	8.24	9.38	23.95	22	22.79	7.14	9.33	4.21	4.38	4.4	8.46	11.04	5.29	8.39	12.03	9.81	6.31
3670	chr1	155281003	155282003	122800	Stx6	45.46	28.35	0.3	-0.31	45.46	30.78	27.67	21.72	28.35	43.11	31.13	62.15	46.38	21.78	24.19	33.93	20.89	28.2	14.72	10.59	39.86	25.4	23.91	35.73
7239	chr10	79840487	79841487	-13445	Ptbp1	57.81	87.46	-0.95	-3.4	57.81	24.54	20.17	13.5	87.46	57.48	57.96	58	38.06	15.56	19.99	20.8	24.19	15.51	11.04	10.59	18.88	88.25	105.46	68.67
40820	chr3	57688307	57689307	3730	Ankub1	6.88	11.95	-1.09	-0.77	6.88	4.68	4.34	2.87	11.95	11.98	5.9	2.76	3.57	4.15	6.31	2.19	6.6	4.23	1.23	5.29	2.1	10.03	10.42	15.41
15683	chr12	117684414	117685414	-158947	Cdca7l	44.55	16.88	1	-1.45	44.55	26.32	31.24	23.27	16.88	47.9	33.27	52.48	30.92	23.85	24.19	40.5	36.29	16.92	31.89	16.94	20.98	26.74	9.2	14.71
47534	chr4	139111034	139112034	-18564	Nbl1	22.49	13.93	0.33	-0.24	22.49	5.42	11.65	7.6	13.93	22.75	19.86	24.86	4.76	4.15	7.36	5.47	15.39	14.1	12.26	4.24	6.29	10.7	12.88	18.22
35676	chr2	57063188	57064188	51350	Nr4a2	33.52	9.82	1.36	-1.96	33.52	7.3	14.21	19.61	9.82	37.13	22	41.43	8.32	6.22	7.36	13.14	15.39	14.1	20.85	23.29	14.69	10.7	11.04	7.71
57483	chr7	68930456	68931456	-181718	Arrdc4	84.96	24.59	1.41	-4.11	84.96	11.58	9.08	10.46	24.59	117.36	67.08	70.43	19.03	5.19	10.52	9.85	3.3	14.1	13.49	7.41	10.49	26.74	19.01	28.03
17164	chr13	53176595	53177595	109014	Ror2	29.15	11.6	0.99	-1.17	29.15	20.61	15.67	13.1	11.6	23.95	33.81	29.69	35.68	11.41	14.73	17.51	15.39	14.1	24.53	8.47	6.29	8.69	13.49	12.61
2969	chr1	129416895	129417895	144091	Thsd7b	3.72	13.25	-2.13	-1.72	3.72	4.32	2.66	3.69	13.25	1.2	8.59	1.38	3.57	5.19	4.21	3.28	3.3	1.41	3.68	3.18	4.2	11.37	12.26	16.12
21985	chr15	4375352	4376352	361	Plcxd3	44.13	20.89	0.74	-1.08	44.13	21.84	18.85	18.83	20.89	37.13	38.64	56.62	32.11	16.59	16.83	20.8	13.19	22.56	19.62	18	18.88	17.38	21.46	23.82
20949	chr14	76685499	76686499	8431	1700108F19Rik	28.74	9.91	1.18	-1.43	28.74	9.58	10.41	18.23	9.91	29.94	30.05	26.24	13.08	7.26	8.41	4.38	19.79	7.05	22.08	9.53	23.08	6.69	15.33	7.71
4909	chr1	191717640	191718640	116	Lpgat1	46.56	49.12	-0.45	-0.74	46.56	14.17	10.7	16.59	49.12	43.11	46.15	50.41	14.27	10.37	17.88	14.23	6.6	11.28	17.17	9.53	23.08	46.8	46.6	53.95
50256	chr5	92728893	92729893	45958	Shroom3	14.56	4.05	1.52	-1.11	14.56	6.16	6.79	9.24	4.05	10.78	17.71	15.19	5.95	7.26	5.26	10.95	6.6	2.82	9.81	7.41	10.49	6.02	1.23	4.9
5148	chr10	5096887	5097887	-28324	Syne1	20.52	23.65	-0.54	-0.56	20.52	12.35	16.24	22.82	23.65	22.75	13.95	24.86	21.41	9.33	6.31	17.51	14.29	16.92	22.08	25.41	20.98	23.4	25.14	22.42
68136	chrX	153366437	153367437	7324	Klf8	14.31	7.49	0.61	-0.35	14.31	7.06	7.94	6.14	7.49	7.19	15.03	20.72	10.7	3.11	7.36	7.66	7.7	8.46	3.68	4.24	10.49	6.69	7.36	8.41
40571	chr3	51276282	51277282	21	4930577N17Rik	68.97	79.37	-0.56	-1.47	68.97	32.31	27.47	22.23	79.37	75.45	61.72	69.74	41.62	30.08	25.24	32.84	24.19	25.38	24.53	21.18	20.98	68.19	90.75	79.18
48555	chr5	21304599	21305599	-67574	Fgl2	20.69	5.02	1.7	-1.79	20.69	9.84	13.06	4.92	5.02	20.36	23.08	18.64	10.7	8.3	10.52	15.33	15.39	8.46	7.36	5.29	2.1	5.35	5.52	4.2
2406	chr1	94175523	94176523	-123470	Pdcd1	21.36	9.28	0.89	-0.8	21.36	11.87	8.25	7.49	9.28	22.75	17.17	24.17	17.84	8.3	9.47	13.14	8.8	2.82	9.81	8.47	4.2	7.35	13.49	7.01
76	chr1	7139185	7140185	50765	Pcmtd1	35.44	17.79	0.65	-0.76	35.44	19.21	15.87	10.23	17.79	27.54	31.13	47.65	27.35	15.56	14.73	17.51	13.19	16.92	15.94	8.47	6.29	19.39	17.17	16.82
53025	chr6	39898912	39899912	27976	Tmem178b	10.27	7.3	0.07	-0.03	10.27	5.56	3.97	4.38	7.3	7.19	9.12	14.5	8.32	3.11	5.26	4.38	3.3	4.23	3.68	3.18	6.29	11.37	4.91	5.61
30716	chr18	38918356	38919356	-157	Fgf1	44.34	17.14	1.05	-1.54	44.34	29.86	25.49	15.32	17.14	47.9	49.91	35.22	41.62	30.08	17.88	21.89	26.39	28.2	12.26	14.82	18.88	7.35	25.14	18.92
56580	chr7	29905881	29906881	-128	Mir7668	31.46	28.5	-0.22	-0.18	31.46	12.78	15.72	8.89	28.5	38.32	33.27	22.79	15.46	17.63	5.26	19.7	17.59	9.87	9.81	8.47	8.39	26.74	34.95	23.82
22494	chr15	28024064	28025064	1284	Trio	71.39	52.41	0.08	-0.09	71.39	39.19	35.05	30.13	52.41	80.24	57.96	75.96	55.9	26.97	34.71	36.12	35.19	33.84	28.21	30.7	31.47	54.15	48.44	54.65
8151	chr10	108483575	108484575	151886	Pawr	14.9	16.96	-0.57	-0.42	14.9	5.15	7.32	6.72	16.96	7.19	16.1	21.41	7.14	6.22	2.1	4.38	7.7	9.87	8.59	5.29	6.29	11.37	17.78	21.72
4431	chr1	177382510	177383510	-59341	Zbtb18	15.59	12.53	-0.07	-0.03	15.59	12.08	8.78	6.72	12.53	16.77	8.59	21.41	14.27	8.3	13.67	8.76	7.7	9.87	15.94	2.12	2.1	10.7	12.88	14.01
42435	chr3	116095546	116096546	33642	Vcam1	5.84	16.78	-1.86	-2.06	5.84	7.6	6.75	4.45	16.78	2.4	7.51	7.6	7.14	7.26	8.41	2.19	11	7.05	4.91	6.35	2.1	16.71	14.72	18.92
22789	chr15	39041803	39042803	-34629	Cthrc1	52.07	25.72	0.65	-1.03	52.07	16.57	20.75	37.86	25.72	47.9	41.32	66.98	22.6	16.59	10.52	14.23	29.69	18.33	42.93	41.29	29.37	22.06	26.37	28.73
2587	chr1	106679659	106680659	34131	Bcl2	47.15	10.54	1.76	-3.68	47.15	46.59	50.41	12.47	10.54	55.09	31.13	55.24	66.6	33.19	39.97	47.07	50.58	53.57	18.4	14.82	4.2	10.7	10.42	10.51
62739	chr8	113957487	113958487	-109148	Adamts18	22.25	5.59	1.61	-1.62	22.25	15.16	7.26	7.14	5.59	32.33	17.17	17.26	21.41	9.33	14.73	7.66	9.9	4.23	2.45	10.59	8.39	2.67	9.2	4.9
14671	chr12	83500022	83501022	-12786	Dpf3	13.46	7.22	0.49	-0.26	13.46	3.17	8.62	5.03	7.22	10.78	12.34	17.26	1.19	6.22	2.1	7.66	5.5	12.69	9.81	5.29	0	6.69	3.07	11.91
33191	chr19	32111595	32112595	-8955	Asah2	35.81	10.58	1.43	-2.23	35.81	9.58	9.14	6.31	10.58	44.31	32.74	30.38	13.08	7.26	8.41	10.95	6.6	9.87	7.36	5.29	6.29	8.02	10.42	13.31
234	chr1	14357247	14358247	-47548	Eya1	7.38	20.36	-1.81	-2.33	7.38	4.07	4.75	5.73	20.36	7.19	8.05	6.91	5.95	3.11	3.16	2.19	2.2	9.87	2.45	4.24	10.49	12.03	29.43	19.62
46344	chr4	102429401	102430401	-140159	Pde4b	24.1	17.7	0.12	-0.08	24.1	33.54	26.17	25.26	17.7	22.75	19.86	29.69	46.38	32.15	22.09	28.46	27.49	22.56	14.72	23.29	37.76	21.39	18.39	13.31
40668	chr3	53598082	53599082	58773	Frem2	10.93	14.9	-0.77	-0.58	10.93	7.68	5.28	5.97	14.9	10.78	17.17	4.83	9.51	9.33	4.21	3.28	5.5	7.05	7.36	6.35	4.2	14.04	15.94	14.71
32143	chr18	84951351	84952351	-327	Timm21	123.92	131.34	-0.44	-1.56	123.92	71.39	71.52	57.86	131.34	140.12	102.51	129.13	95.14	63.27	55.75	64.58	78.07	71.9	66.23	40.23	67.13	123.01	143.48	127.52
12040	chr11	105261306	105262306	-30840	Mrc2	3.14	17.24	-2.91	-3.26	3.14	3.28	2.61	2.57	17.24	0	3.22	6.21	3.57	2.07	4.21	1.09	1.1	5.64	2.45	1.06	4.2	22.73	12.88	16.12
34875	chr2	26500310	26501310	3012	Notch1	67.17	30.71	0.79	-1.71	67.17	33.9	38.29	28.11	30.71	76.65	55.81	69.05	54.71	24.89	22.09	30.65	36.29	47.93	38.02	16.94	29.37	27.41	37.4	27.33
10127	chr11	46564337	46565337	-6676	BC053393	17.66	7.73	0.81	-0.61	17.66	13.26	6.32	2.11	7.73	19.16	14.49	19.33	17.84	11.41	10.52	3.28	4.4	11.28	0	2.12	4.2	9.36	6.13	7.71
46636	chr4	111400518	111401518	-13988	Bend5	31.97	9.9	1.37	-1.91	31.97	13.15	11.44	6.6	9.9	35.93	26.83	33.15	15.46	13.48	10.52	9.85	13.19	11.28	13.49	2.12	4.2	5.35	11.04	13.31
11973	chr11	103080212	103081212	236	Plcd3	14.49	13.92	-0.32	-0.2	14.49	8.78	14.83	19.28	13.92	13.17	12.34	17.95	10.7	10.37	5.26	18.61	13.19	12.69	14.72	13.76	29.37	11.37	17.78	12.61
9191	chr11	11923729	11924729	-26085	Ddc	18.76	8.7	0.73	-0.56	18.76	5.42	5.91	12.17	8.7	19.16	15.03	22.1	4.76	5.19	6.31	4.38	7.7	5.64	12.26	11.65	12.59	11.37	4.91	9.81
61721	chr8	78595143	78596143	86315	Slc10a7	46.73	16.39	1.16	-2.15	46.73	19.79	21.88	14.79	16.39	53.89	38.64	47.65	33.3	15.56	10.52	22.99	18.69	23.97	15.94	11.65	16.78	16.05	13.49	19.62
50974	chr5	117566005	117567005	152503	Ksr2	16.1	5.75	1.13	-0.88	16.1	6.65	12.17	10.71	5.75	19.16	13.95	15.19	9.51	5.19	5.26	13.14	12.1	11.28	11.04	12.71	8.39	7.35	4.29	5.61
35016	chr2	30604925	30605925	10381	Cstad	17.96	33.93	-1.28	-2.46	17.96	8.83	10.29	11.12	33.93	20.36	15.56	17.95	11.89	9.33	5.26	10.95	14.29	5.64	12.26	12.71	8.39	36.1	35.56	30.13
27181	chr17	4777877	4778877	143397	4930517M08Rik	9.18	10.54	-0.57	-0.33	9.18	12.86	10.45	5.9	10.54	9.58	4.83	13.12	16.65	10.37	11.57	6.57	12.1	12.69	6.13	3.18	8.39	7.35	11.65	12.61
47056	chr4	126309386	126310386	11817	Adprhl2	25.46	14.05	0.5	-0.43	25.46	15.83	13.99	15.08	14.05	19.16	26.83	30.38	20.22	6.22	21.04	19.7	11	11.28	7.36	12.71	25.18	14.04	14.1	14.01
6669	chr10	61648048	61649048	-73	Ppa1	34.48	48.78	-0.85	-1.8	34.48	29	23.09	29.03	48.78	40.72	31.66	31.07	36.87	25.93	24.19	20.8	23.09	25.38	28.21	14.82	44.06	51.48	52.12	42.74
3502	chr1	151040668	151041668	-47733	Hmcn1	21.08	13.55	0.28	-0.19	21.08	29.91	17.08	6.14	13.55	16.77	20.93	25.55	41.62	19.71	28.4	15.33	17.59	18.33	3.68	6.35	8.39	14.71	14.72	11.21
64563	chr9	50856582	50857582	158	Ppp2r1b	53.27	56.07	-0.42	-0.71	53.27	26.08	23.26	27.64	56.07	44.31	59.57	55.93	41.62	13.48	23.14	15.33	31.89	22.56	28.21	16.94	37.76	52.15	60.7	55.35
61134	chr8	56982721	56983721	337638	AV026068	7.35	30.26	-2.32	-4.62	7.35	3.32	3.97	3.16	30.26	4.79	9.66	7.6	4.76	3.11	2.1	3.28	4.4	4.23	0	3.18	6.29	30.08	26.37	34.33
17340	chr13	59011165	59012165	203968	Ntrk2	23.15	14.26	0.39	-0.29	23.15	7.19	9.98	11.41	14.26	28.74	24.15	16.57	5.95	10.37	5.26	8.76	9.9	11.28	11.04	10.59	12.59	15.38	14.1	13.31
65038	chr9	66988620	66989620	-13636	Lactb	6.66	30.37	-2.46	-4.96	6.66	9.07	6.27	9.08	30.37	4.79	9.66	5.52	9.51	12.45	5.26	6.57	6.6	5.64	6.13	12.71	8.39	26.74	34.95	29.43
119	chr1	10037429	10038429	230	Cops5	87.65	71.73	-0.07	-0.09	87.65	41.58	37.5	41.09	71.73	101.79	71.38	89.77	54.71	32.15	37.87	42.69	37.39	32.43	45.38	29.65	48.25	72.87	77.87	64.46
12956	chr12	12420533	12421533	-28558	4921511I17Rik	22.9	25.73	-0.53	-0.57	22.9	20.3	21.21	24.21	25.73	22.75	15.56	30.38	28.54	16.59	15.78	22.99	20.89	19.74	22.08	23.29	27.27	23.4	25.75	28.03
59167	chr7	128417788	128418788	-116	Rgs10	30.84	35.45	-0.56	-0.75	30.84	20.04	15.62	16.32	35.45	27.54	21.47	43.5	30.92	16.59	12.62	15.33	13.19	18.33	18.4	15.88	14.69	38.11	37.4	30.83
40672	chr3	53630890	53631890	25965	Frem2	35	11.02	1.31	-1.99	35	8.08	9.2	13.57	11.02	40.72	31.13	33.15	10.7	10.37	3.16	4.38	7.7	15.51	19.62	10.59	10.49	8.02	11.04	14.01
37494	chr2	121955683	121956683	-91	Mageb3	89.78	132.38	-0.92	-5.07	89.78	70.97	65.82	63.97	132.38	100.6	71.38	97.36	102.28	60.15	50.49	65.68	72.57	59.21	46.61	59.29	86.02	131.04	143.48	122.62
52602	chr6	24551785	24552785	24141	Asb15	22.12	8.25	1.1	-1.03	22.12	9.18	10.61	9.29	8.25	14.37	20.93	31.07	11.89	8.3	7.36	9.85	12.1	9.87	11.04	6.35	10.49	8.02	10.42	6.31
29887	chr18	8341677	8342677	472464	Wac	10.3	27.6	-1.82	-3.26	10.3	2.53	3.71	1.46	27.6	7.19	11.27	12.43	2.38	3.11	2.1	3.28	2.2	5.64	1.23	1.06	2.1	24.74	30.04	28.03
59643	chr7	143822238	143823238	114	Nadsyn1	56.21	65.42	-0.57	-1.16	56.21	34.43	38.8	36.31	65.42	65.87	46.15	56.62	41.62	28	33.66	38.31	32.99	45.11	40.47	28.59	39.86	56.83	88.29	51.15
30337	chr18	25408192	25409192	239672	AW554918	30.74	12.66	0.92	-1.14	30.74	9.72	13.74	10.65	12.66	29.94	28.44	33.84	16.65	7.26	5.26	16.42	12.1	12.69	9.81	11.65	10.49	10.03	15.33	12.61
14311	chr12	73517001	73518001	28894	Tmem30b	13.65	14.29	-0.43	-0.28	13.65	9.7	8.05	11.39	14.29	19.16	10.73	11.05	7.14	9.33	12.62	5.47	8.8	9.87	11.04	6.35	16.78	14.04	9.2	19.62
55447	chr6	129543770	129544770	-10986	1700101I11Rik	21.57	22.47	-0.4	-0.36	21.57	16.3	15.04	13.68	22.47	16.77	23.08	24.86	23.79	10.37	14.73	15.33	14.29	15.51	7.36	12.71	20.98	24.07	20.23	23.12
31022	chr18	51152250	51153250	34852	Prr16	36.06	11.53	1.27	-1.89	36.06	12.76	13.8	8.36	11.53	41.92	33.81	32.45	14.27	13.48	10.52	10.95	21.99	8.46	6.13	6.35	12.59	14.71	7.97	11.91
41284	chr3	79179824	79180824	-32595	4921511C10Rik	25.5	9.88	1.04	-1.12	25.5	11.06	7.94	9.6	9.88	20.36	25.76	30.38	15.46	10.37	7.36	7.66	7.7	8.46	9.81	12.71	6.29	8.02	10.42	11.21
40133	chr3	32213636	32214636	-151353	4930429B21Rik	18.81	9.97	0.57	-0.41	18.81	12.96	13.33	12.69	9.97	22.75	19.86	13.81	19.03	9.33	10.52	12.04	20.89	7.05	8.59	10.59	18.88	13.37	6.74	9.81
38898	chr2	164493561	164494561	-3464	Pigt	13.37	6.1	0.83	-0.53	13.37	7.69	6.37	6.56	6.1	15.57	10.73	13.81	9.51	7.26	6.31	9.85	2.2	7.05	4.91	8.47	6.29	4.01	7.97	6.31
19726	chr14	31215159	31216159	-2214	Sema3g	18.89	14.27	0.01	-0.01	18.89	7.7	11.28	12.33	14.27	19.16	16.1	21.41	9.51	6.22	7.36	14.23	15.39	4.23	8.59	9.53	18.88	16.71	13.49	12.61
18138	chr13	93338121	93339121	30587	Homer1	15	12.23	-0.08	-0.04	15	4.42	3.39	3.4	12.23	16.77	12.34	15.88	5.95	4.15	3.16	5.47	3.3	1.41	4.91	3.18	2.1	9.36	9.81	17.52
63200	chr8	126482670	126483670	-8105	Tarbp1	10.45	11.58	-0.44	-0.26	10.45	7.93	11.18	8.07	11.58	9.58	10.73	11.05	7.14	12.45	4.21	9.85	11	12.69	7.36	8.47	8.39	13.37	12.26	9.11
30347	chr18	25557691	25558691	121557	Celf4	48.49	17.26	1.12	-2.12	48.49	21.99	29.88	38.21	17.26	51.5	35.96	58	35.68	14.52	15.78	25.18	26.39	38.07	42.93	38.12	33.57	14.04	20.23	17.52
25307	chr16	30283662	30284662	-908	Lrrc15	27.96	17.36	0.3	-0.22	27.96	14.65	12.64	19.16	17.36	38.32	14.49	31.07	17.84	12.45	13.67	13.14	12.1	12.69	19.62	10.59	27.27	15.38	22.69	14.01
20733	chr14	70123348	70124348	23755	Bin3	14.73	5.47	1.01	-0.73	14.73	12.87	13.37	13.17	5.47	15.57	13.42	15.19	16.65	8.3	13.67	9.85	7.7	22.56	18.4	12.71	8.39	4.68	6.13	5.61
60264	chr8	25093360	25094360	7951	Plekha2	32.94	10.34	1.3	-1.78	32.94	16.55	26.75	20.29	10.34	39.52	22	37.29	21.41	12.45	15.78	25.18	29.69	25.38	13.49	20.12	27.27	14.04	8.58	8.41
14424	chr12	76837046	76838046	79	Fntb	88.75	83.18	-0.27	-0.48	88.75	44.29	40.28	34.75	83.18	117.36	61.18	87.7	70.17	28	34.71	39.41	46.18	35.25	22.08	38.12	44.06	80.23	85.23	84.08
37874	chr2	133346579	133347579	-205080	Bmp2	34.82	21.36	0.34	-0.33	34.82	19.35	20.89	9.88	21.36	37.13	30.05	37.29	30.92	15.56	11.57	25.18	12.1	25.38	8.59	8.47	12.59	16.71	21.46	25.92
18194	chr13	95102680	95103680	119870	Pde8b	10.38	3.72	1.21	-0.7	10.38	8.99	9.98	6.6	3.72	9.58	13.95	7.6	15.46	5.19	6.31	8.76	9.9	11.28	6.13	5.29	8.39	2.67	4.29	4.2
40899	chr3	60638850	60639850	138171	Mbnl1	4.45	22.7	-2.72	-4.07	4.45	3.24	3.39	3.69	22.7	2.4	7.51	3.45	2.38	2.07	5.26	5.47	3.3	1.41	3.68	3.18	4.2	20.72	21.46	25.92
13839	chr12	52347435	52348435	132674	Gm35135	20.9	6.57	1.27	-1.01	20.9	4.98	6.37	7.2	6.57	10.78	18.78	33.15	2.38	5.19	7.36	5.47	6.6	7.05	11.04	8.47	2.1	12.7	4.91	2.1
16150	chr13	19619080	19620080	250	Epdr1	104.28	55.23	0.56	-1.46	104.28	59.59	58.02	55.57	55.23	97	90.16	125.68	86.82	42.52	49.44	63.49	52.78	57.8	68.68	51.88	46.16	53.48	53.34	58.86
10346	chr11	54112580	54113580	12156	P4ha2	40.45	40.39	-0.34	-0.42	40.45	33.73	26.28	28.53	40.39	52.69	32.74	35.91	49.95	20.74	30.5	18.61	26.39	33.84	31.89	22.23	31.47	30.08	44.15	46.94
43769	chr3	157717156	157718156	150764	Ptger3	29.58	25.75	-0.16	-0.13	29.58	9.84	11.44	15.14	25.75	31.14	23.08	34.53	10.7	8.3	10.52	14.23	8.8	11.28	15.94	10.59	18.88	27.41	23.91	25.92
8071	chr10	105657295	105658295	83244	Gm15663	33.84	8.82	1.61	-2.44	33.84	5.81	5.28	5.15	8.82	26.35	31.66	43.5	5.95	6.22	5.26	4.38	4.4	7.05	4.91	6.35	4.2	10.7	7.36	8.41
7965	chr10	100603953	100604953	12067	1700017N19Rik	20.89	15.64	0.05	-0.03	20.89	5.06	6.95	5.43	15.64	17.96	15.03	29.69	4.76	6.22	4.21	3.28	7.7	9.87	3.68	2.12	10.49	15.38	14.72	16.82
16485	chr13	30259613	30260613	-76243	Agtr1a	8.73	10.93	-0.7	-0.39	8.73	11.24	4.44	6.61	10.93	14.37	2.15	9.67	10.7	8.3	14.73	5.47	2.2	5.64	6.13	7.41	6.29	10.03	7.36	15.41
26522	chr16	76895983	76896983	114398	1700041M19Rik	29.67	29.55	-0.37	-0.39	29.67	14.25	21.26	15.15	29.55	26.35	24.69	37.98	16.65	13.48	12.62	17.51	20.89	25.38	23.3	11.65	10.49	32.76	25.75	30.13
28429	chr17	47610740	47611740	252	Bysl	34.89	53.09	-0.95	-2.17	34.89	32.3	27.63	23.75	53.09	26.35	42.4	35.91	40.44	23.85	32.61	27.37	23.09	32.43	26.98	21.18	23.08	55.49	53.34	50.45
28233	chr17	43105761	43106761	52030	E130008D07Rik	14.53	9.63	0.23	-0.11	14.53	7.24	7.68	7.54	9.63	10.78	20.39	12.43	7.14	10.37	4.21	6.57	6.6	9.87	11.04	5.29	6.29	9.36	5.52	14.01
46211	chr4	98593627	98594627	47493	Patj	29	12.34	0.89	-1.02	29	14.7	17.19	8.79	12.34	29.94	22.54	34.53	19.03	11.41	13.67	19.7	21.99	9.87	7.36	12.71	6.29	10.03	17.17	9.81
49892	chr5	75544468	75545468	-30019	Kit	14.96	49.2	-2.09	-6.1	14.96	40.67	22.61	8.06	49.2	8.38	17.17	19.33	48.76	26.97	46.28	19.7	14.29	33.84	7.36	4.24	12.59	39.44	52.12	56.05
45608	chr4	75803396	75804396	-525604	Dmac1	6.69	13.97	-1.4	-1.27	6.69	3.28	1.94	4.74	13.97	4.79	6.98	8.29	3.57	2.07	4.21	0	4.4	1.41	3.68	4.24	6.29	15.38	10.42	16.12
32127	chr18	84588864	84589864	140	Zfp407	59.41	70.29	-0.59	-1.43	59.41	36.71	31.03	29.06	70.29	52.69	60.64	64.91	54.71	22.82	32.61	27.37	31.89	33.84	28.21	23.29	35.67	60.84	72.96	77.07
30241	chr18	22290154	22291154	-54435	Asxl3	30.06	24.81	-0.1	-0.06	30.06	6.52	7.32	8.93	24.81	13.17	30.05	46.96	5.95	5.19	8.41	4.38	7.7	9.87	3.68	4.24	18.88	28.08	28.82	17.52
13292	chr12	29950770	29951770	13234	Pxdn	14.04	25.17	-1.17	-1.61	14.04	23.34	16.14	4.45	25.17	9.58	11.81	20.72	42.81	9.33	17.88	16.42	16.49	15.51	4.91	4.24	4.2	25.4	26.98	23.12
27900	chr17	29660173	29661173	78	Cmtr1	38.13	54.76	-0.88	-2.15	38.13	28.68	22.73	26.43	54.76	38.32	38.1	37.98	38.06	28	19.99	21.89	30.79	15.51	24.53	23.29	31.47	48.14	60.09	56.05
37047	chr2	106895351	106896351	74540	Arl14ep	31.82	6.82	1.89	-2.88	31.82	8.58	8.21	9.89	6.82	26.35	31.13	37.98	14.27	7.26	4.21	6.57	11	7.05	8.59	10.59	10.49	8.02	6.13	6.31
42198	chr3	105058459	105059459	-5813	Cttnbp2nl	15.92	22.64	-0.85	-0.94	15.92	9.38	10.39	13.15	22.64	13.17	11.81	22.79	8.32	11.41	8.41	14.23	9.9	7.05	11.04	9.53	18.88	19.39	28.2	20.32
30569	chr18	35089200	35090200	-29212	Ctnna1	9.44	31.63	-2.11	-4.35	9.44	8.34	7.11	9.31	31.63	11.98	8.05	8.29	8.32	9.33	7.36	4.38	9.9	7.05	3.68	13.76	10.49	37.44	29.43	28.03
1260	chr1	57377090	57378090	-30	1700066M21Rik	108.56	77.72	0.12	-0.18	108.56	59.4	57.73	45.45	77.72	117.36	87.48	120.84	90.38	37.34	50.49	51.45	68.17	53.57	47.83	44.47	44.06	70.87	85.23	77.07
43222	chr3	139985638	139986638	-42111	Mir7j	62.9	10.52	2.23	-6.47	62.9	65.29	49.52	10.59	10.52	68.26	47.23	73.2	98.71	47.71	49.44	49.26	52.78	46.52	15.94	9.53	6.29	12.03	10.42	9.11
35367	chr2	44009919	44010919	54905	Arhgap15os	29.53	6.67	1.78	-2.47	29.53	26.48	14.16	6.83	6.67	27.54	23.08	37.98	34.49	19.71	25.24	13.14	11	18.33	3.68	2.12	14.69	8.02	4.29	7.71
2220	chr1	89095420	89096420	25505	Sh3bp4	21.28	6.08	1.48	-1.45	21.28	7.66	9.87	14.23	6.08	11.98	26.3	25.55	8.32	5.19	9.47	9.85	9.9	9.87	18.4	18	6.29	6.69	7.36	4.2
8043	chr10	105019865	105020865	554114	Tmtc2	17.69	26.99	-0.95	-1.22	17.69	5.06	5.33	6.2	26.99	9.58	24.15	19.33	4.76	6.22	4.21	7.66	5.5	2.82	4.91	7.41	6.29	24.74	28.2	28.03
11877	chr11	101447872	101448872	-40	Ifi35	12.59	16.84	-0.79	-0.72	12.59	14.7	10.08	11.7	16.84	14.37	12.34	11.05	19.03	12.45	12.62	9.85	7.7	12.69	9.81	12.71	12.59	16.71	18.39	15.41
17005	chr13	47974164	47975164	43944	4931429P17Rik	10.65	18.41	-1.12	-1.21	10.65	5.51	4.13	6.56	18.41	10.78	12.88	8.29	7.14	6.22	3.16	6.57	4.4	1.41	4.91	8.47	6.29	17.38	19.62	18.22
49307	chr5	51085515	51086515	467906	Ppargc1a	12.43	3.51	1.38	-0.92	12.43	1.05	4.44	2.23	3.51	14.37	9.12	13.81	0	0	3.16	4.38	3.3	5.64	2.45	4.24	0	3.34	3.68	3.5
51726	chr5	140852355	140853355	-22424	Gna12	61.89	10.35	2.22	-5.87	61.89	23.1	20.84	12.52	10.35	85.03	44.01	56.62	28.54	18.67	22.09	19.7	23.09	19.74	12.26	14.82	10.49	13.37	8.58	9.11
21069	chr14	79770850	79771850	-38	Pcdh8	55.03	52.95	-0.31	-0.47	55.03	37.69	35.52	37.96	52.95	51.5	49.37	64.22	61.84	22.82	28.4	35.03	36.29	35.25	45.38	32.82	35.67	55.49	46.6	56.75
25145	chr16	24941001	24942001	-118138	A230028O05Rik	80.83	26.81	1.22	-3.19	80.83	15.59	17.55	14.8	26.81	100.6	49.37	92.53	23.79	10.37	12.62	15.33	17.59	19.74	15.94	15.88	12.59	32.09	29.43	18.92
15179	chr12	101717845	101718845	178	Tc2n	69.79	58.18	-0.12	-0.13	69.79	18.43	23.04	32.97	58.18	81.44	45.08	82.86	24.97	13.48	16.83	25.18	24.19	19.74	42.93	41.29	14.69	54.82	49.66	70.07
34911	chr2	27441902	27442902	-34	Brd3os	55.88	59.7	-0.45	-0.68	55.88	35.2	34.74	40.7	59.7	85.03	46.69	35.91	44	32.15	29.45	29.56	35.19	39.47	36.79	37.06	48.25	58.83	65.61	54.65
34537	chr2	13888249	13889249	-95229	St8sia6	9.44	42.06	-2.52	-6.85	9.44	3.08	4.86	1.11	42.06	5.99	11.27	11.05	7.14	1.04	1.05	7.66	5.5	1.41	1.23	0	2.1	33.43	47.21	45.54
57432	chr7	67618037	67619037	26699	Lrrc28	15.14	6.6	0.8	-0.49	15.14	6.34	6.43	4.74	6.6	17.96	15.03	12.43	10.7	6.22	2.1	6.57	9.9	2.82	3.68	4.24	6.29	12.7	4.29	2.8
19171	chr14	10720229	10721229	-17824	Fhitos	5.39	14.49	-1.81	-1.85	5.39	7.64	4.34	3.51	14.49	7.19	4.83	4.14	8.32	8.3	6.31	2.19	6.6	4.23	7.36	3.18	0	10.7	15.94	16.82
44036	chr4	11190709	11191709	-142	Ccne2	150.65	130.37	-0.16	-0.34	150.65	60.94	58.76	59.29	130.37	160.48	125.05	166.42	95.14	48.75	38.92	62.4	56.08	57.8	51.51	52.94	73.43	121.68	154.51	114.91
4387	chr1	175668707	175669707	19146	Chml	14.39	11.81	-0.07	-0.03	14.39	10.87	10.6	8.07	11.81	7.19	11.81	24.17	19.03	6.22	7.36	15.33	6.6	9.87	7.36	6.35	10.49	10.03	13.49	11.91
11822	chr11	100414129	100415129	190	P3h4	61.78	78.48	-0.7	-2.03	61.78	46.87	39.14	32.02	78.48	69.46	60.64	55.24	65.41	37.34	37.87	33.93	53.88	29.61	31.89	20.12	44.06	70.87	84	80.58
3445	chr1	148316370	148317370	1605569	Pla2g4a	20.24	5.24	1.56	-1.54	20.24	8.43	7.79	6.84	5.24	19.16	13.95	27.62	19.03	4.15	2.1	4.38	7.7	11.28	11.04	5.29	4.2	4.68	6.13	4.9
66253	chr9	109862112	109863112	-12967	Cdc25a	13.27	12.89	-0.33	-0.2	13.27	7.94	8.41	12.93	12.89	11.98	11.27	16.57	7.14	10.37	6.31	6.57	8.8	9.87	13.49	14.82	10.49	12.03	14.72	11.91
27024	chr16	94764853	94765853	91337	Kcnj6	14.56	26.22	-1.23	-1.5	14.56	17.86	9.4	5.62	26.22	8.38	11.81	23.48	20.22	20.74	12.62	14.23	5.5	8.46	7.36	5.29	4.2	12.7	38.63	27.33
7335	chr10	81105592	81106592	177	Map2k2	67.35	82.62	-0.64	-1.77	67.35	41.13	35.52	32.81	82.62	67.06	73.52	61.46	60.65	26.97	35.76	41.6	39.58	25.38	33.11	31.76	33.57	85.57	90.13	72.17
60072	chr8	15811427	15812427	356911	Mir3106	22.55	12.24	0.5	-0.39	22.55	6.16	5.9	4.39	12.24	25.15	15.56	26.93	5.95	7.26	5.26	7.66	4.4	5.64	3.68	5.29	4.2	12.03	8.58	16.12
42397	chr3	114789926	114790926	-113652	Olfm3	7.9	35.91	-2.51	-5.45	7.9	3.63	1.2	2.93	35.91	3.59	11.81	8.29	3.57	4.15	3.16	0	2.2	1.41	2.45	4.24	2.1	45.46	34.95	27.33
1959	chr1	79000183	79001183	183772	Kcne4	13.39	6.04	0.77	-0.45	13.39	4.67	6.27	4.57	6.04	13.17	6.98	20.03	3.57	6.22	4.21	4.38	8.8	5.64	7.36	4.24	2.1	5.35	8.58	4.2
55693	chr6	139941905	139942905	99012	Plcz1	6.9	12.31	-1.18	-0.96	6.9	2.84	2.77	2.52	12.31	7.19	5.9	7.6	1.19	2.07	5.26	3.28	2.2	2.82	1.23	2.12	4.2	10.03	12.88	14.01
42979	chr3	132462158	132463158	-167533	Gimd1	81.87	18.34	1.8	-6.52	81.87	61.33	39.49	16.28	18.34	89.82	66.01	89.77	95.14	38.37	50.49	41.6	37.39	39.47	17.17	23.29	8.39	14.04	22.07	18.92
49061	chr5	40223155	40224155	-579024	Hs3st1	8.44	16.33	-1.26	-1.28	8.44	3.28	3.6	4.32	16.33	5.99	9.66	9.67	3.57	3.11	3.16	3.28	3.3	4.23	2.45	2.12	8.39	14.04	20.23	14.71
62677	chr8	111743399	111744399	-50	Bcar1	30.96	43.04	-0.83	-1.48	30.96	10.3	15.78	19.3	43.04	23.95	36.49	32.45	13.08	4.15	13.67	10.95	20.89	15.51	14.72	18	25.18	38.11	54.57	36.43
11627	chr11	95365358	95366358	-18998	Slc35b1	4.82	19.01	-2.28	-3.07	4.82	4.22	6.01	8.65	19.01	4.79	4.83	4.83	1.19	6.22	5.26	4.38	6.6	7.05	12.26	5.29	8.39	16.05	22.07	18.92
41383	chr3	81583293	81584293	-218232	A830029E22Rik	72.11	37.99	0.56	-1	72.11	23.29	16.3	17.47	37.99	70.66	57.96	87.7	33.3	16.59	19.99	17.51	18.69	12.69	20.85	10.59	20.98	32.09	30.04	51.85
58828	chr7	117139164	117140164	-241315	Xylt1	8.64	23.36	-1.78	-2.62	8.64	8.53	7.74	7.08	23.36	5.99	12.34	7.6	13.08	7.26	5.26	5.47	12.1	5.64	8.59	6.35	6.29	26.74	20.23	23.12
519	chr1	27277468	27278468	-590508	4931408C20Rik	8.87	2.04	1.73	-0.85	8.87	5.33	3.76	2.46	2.04	7.19	6.98	12.43	2.38	5.19	8.41	4.38	5.5	1.41	0	5.29	2.1	4.01	0	2.1
6383	chr10	52703944	52704944	13943	Slc35f1	63.17	45.72	0.11	-0.12	63.17	30.59	30.29	26.08	45.72	59.88	53.67	75.96	49.95	18.67	23.14	36.12	30.79	23.97	31.89	21.18	25.18	40.11	56.41	40.64
50409	chr5	99598135	99599135	130425	A930011G23Rik	27.28	14.4	0.6	-0.57	27.28	21.63	22.51	14.86	14.4	31.14	23.08	27.62	35.68	17.63	11.57	21.89	23.09	22.56	9.81	18	16.78	17.38	10.42	15.41
43850	chr4	4635805	4636805	-106847	Gm11780	47.11	14.94	1.3	-2.34	47.11	15.01	14.27	13.44	14.94	35.93	41.86	63.53	17.84	12.45	14.73	12.04	20.89	9.87	9.81	9.53	20.98	15.38	19.62	9.81
60062	chr8	15438264	15439264	381111	Myom2	17.11	6.72	0.92	-0.66	17.11	6.99	7.31	7.42	6.72	21.56	6.98	22.79	9.51	7.26	4.21	5.47	6.6	9.87	1.23	6.35	14.69	6.69	8.58	4.9
45059	chr4	54688456	54689456	-258989	Zfp462	18.38	5.75	1.37	-1.27	18.38	10.64	5.9	6.25	5.75	15.57	20.93	18.64	13.08	7.26	11.57	8.76	3.3	5.64	6.13	4.24	8.39	6.02	4.91	6.31
63855	chr9	27538144	27539144	141432	Spata19	34.94	12.56	1.1	-1.53	34.94	9.63	10.71	8.3	12.56	29.94	27.91	46.96	14.27	8.3	6.31	10.95	9.9	11.28	4.91	5.29	14.69	10.7	17.17	9.81
15644	chr12	116280693	116281693	-29	Esyt2	207.73	211.47	-0.39	-1.87	207.73	165.09	156.5	148.72	211.47	228.74	182.47	211.99	248.56	107.86	138.85	157.63	163.84	148.03	154.53	115.41	176.23	203.91	223.8	206.7
59203	chr7	129941224	129942224	-20441	Gm4265	27.56	7.63	1.5	-1.74	27.56	8.42	7.94	6.09	7.63	17.96	34.35	30.38	10.7	11.41	3.16	6.57	8.8	8.46	9.81	6.35	2.1	2.67	10.42	9.81
36151	chr2	71966500	71967500	-14215	Rapgef4	24.92	8.43	1.2	-1.25	24.92	9.24	10.61	5.33	8.43	34.73	14.49	25.55	13.08	6.22	8.41	8.76	13.19	9.87	8.59	5.29	2.1	9.36	6.13	9.81
66913	chrX	16740931	16741931	75935	Maob	9.65	2.38	1.66	-0.86	9.65	3.27	1.1	2.52	2.38	10.78	6.44	11.74	3.57	5.19	1.05	1.09	2.2	0	1.23	2.12	4.2	4.68	2.45	0
16082	chr13	16761162	16762162	-738239	B230303A05Rik	9.25	15.76	-1.16	-0.95	9.25	6.95	8.63	10.51	15.76	7.19	10.2	10.36	8.32	7.26	5.26	2.19	11	12.69	7.36	5.29	18.88	9.36	9.2	28.73
26114	chr16	57473418	57474418	-75324	Filip1l	47.03	15.27	1.25	-2.33	47.03	14.21	13.89	14.03	15.27	45.51	32.74	62.84	15.46	12.45	14.73	20.8	11	9.87	7.36	11.65	23.08	14.71	17.78	13.31
63714	chr9	21988206	21989206	747	Rgl3	16.96	14.18	-0.12	-0.06	16.96	11.16	14.93	16.57	14.18	14.37	22	14.5	17.84	10.37	5.26	21.89	8.8	14.1	15.94	21.18	12.59	13.37	16.55	12.61
60340	chr8	26747130	26748130	76793	2310008N11Rik	40.94	53.26	-0.72	-1.53	40.94	25.86	21.67	33.9	53.26	45.51	38.64	38.67	36.87	22.82	17.88	25.18	18.69	21.15	34.34	25.41	41.96	44.79	53.34	61.66
54306	chr6	91712500	91713500	28933	Slc6a6	17.84	6.84	1.06	-0.76	17.84	23.97	27.31	26.55	6.84	7.19	21.47	24.86	33.3	20.74	17.88	33.93	19.79	28.2	26.98	25.41	27.27	3.34	7.36	9.81
56901	chr7	44839590	44840590	3802	Il4i1	21.07	20.21	-0.26	-0.2	21.07	16.55	16.92	22.92	20.21	21.56	20.93	20.72	21.41	12.45	15.78	15.33	14.29	21.15	17.17	22.23	29.37	19.39	20.23	21.02
51694	chr5	139981728	139982728	74285	Elfn1	10.79	12.81	-0.53	-0.32	10.79	8.73	8.72	9.66	12.81	11.98	15.56	4.83	9.51	9.33	7.36	6.57	5.5	14.1	11.04	11.65	6.29	13.37	11.04	14.01
39257	chr2	173131967	173132967	7718	Ctcflos	18.75	8.36	0.8	-0.62	18.75	13.07	14.78	7.91	8.36	23.95	15.03	17.26	13.08	12.45	13.67	13.14	14.29	16.92	11.04	10.59	2.1	10.7	7.36	7.01
61455	chr8	69831970	69832970	-154	Pbx4	81.73	68.02	-0.09	-0.11	81.73	51.93	38.7	47.11	68.02	77.84	71.38	95.98	78.49	38.37	38.92	38.31	34.09	43.7	60.1	49.76	31.47	58.83	87.07	58.16
21586	chr14	106269389	106270389	163691	Trim52	66.63	21.79	1.22	-3.07	66.63	45.23	41.43	8.78	21.79	71.86	47.23	80.79	76.11	26.97	32.61	33.93	49.48	40.88	14.72	9.53	2.1	24.74	19.62	21.02
8530	chr10	120476092	120477092	-123	Hmga2	53.01	45.67	-0.15	-0.16	53.01	36.08	43.1	34.19	45.67	61.08	50.98	46.96	48.76	34.23	25.24	38.31	47.28	43.7	25.76	26.47	50.35	48.8	49.66	38.54
55207	chr6	123971485	123972485	-52773	Vmn2r26	65.62	32.78	0.63	-1.12	65.62	19.07	12.74	7.45	32.78	85.03	57.96	53.86	23.79	16.59	16.83	18.61	5.5	14.1	8.59	11.65	2.1	36.77	30.04	31.53
50775	chr5	111262476	111263476	-67721	Pitpnb	11.01	24.28	-1.5	-2.3	11.01	12.47	9.66	11.81	24.28	13.17	10.2	9.67	15.46	9.33	12.62	13.14	8.8	7.05	12.26	8.47	14.69	24.74	26.37	21.72
28513	chr17	49563679	49564679	158	Daam2	56.04	53.61	-0.3	-0.44	56.04	30.16	30.83	31.94	53.61	65.87	40.79	61.46	40.44	32.15	17.88	30.65	40.68	21.15	36.79	29.65	29.37	52.15	53.34	55.35
45256	chr4	62256635	62257635	-29294	Slc31a2	11.98	8.97	0.07	-0.03	11.98	4.03	5.54	8.82	8.97	10.78	13.42	11.74	4.76	2.07	5.26	4.38	6.6	5.64	8.59	5.29	12.59	8.69	9.81	8.41
25569	chr16	38341346	38342346	14	Maats1	33.17	30.66	-0.25	-0.24	33.17	12.12	8.2	11.11	30.66	29.94	24.69	44.88	15.46	9.33	11.57	7.66	9.9	7.05	19.62	7.41	6.29	32.76	31.88	27.33
33099	chr19	29354911	29355911	6460	Plgrkt	25.9	24.83	-0.33	-0.3	25.9	11.87	7.84	9.46	24.83	31.14	18.25	28.31	17.84	8.3	9.47	7.66	8.8	7.05	14.72	3.18	10.49	24.74	24.53	25.22
31363	chr18	61741622	61742622	15732	1500015A07Rik	11.13	10.86	-0.33	-0.17	11.13	9.03	6.58	5.62	10.86	8.38	13.95	11.05	8.32	11.41	7.36	5.47	4.4	9.87	7.36	7.41	2.1	7.35	14.72	10.51
13925	chr12	55007260	55008260	-21424	Baz1a	29.53	7.62	1.56	-2.02	29.53	10.03	10.87	11.3	7.62	37.13	20.39	31.07	7.14	13.48	9.47	9.85	14.29	8.46	8.59	14.82	10.49	10.7	7.97	4.2
39466	chr2	180346785	180347785	-12606	Gata5	10.21	12.72	-0.65	-0.46	10.21	7.89	6.9	13.58	12.72	11.98	9.66	8.98	5.95	12.45	5.26	6.57	9.9	4.23	12.26	15.88	12.59	13.37	12.88	11.91
39776	chr3	18215050	18216050	27788	Cyp7b1	14.58	35.68	-1.65	-3.34	14.58	8.54	3.76	7.72	35.68	11.98	9.66	22.1	13.08	6.22	6.31	5.47	4.4	1.41	7.36	7.41	8.39	25.4	41.69	39.94
52577	chr6	23938681	23939681	30879	Tas2r118	9.51	23.49	-1.71	-2.51	9.51	4.32	6.63	10.17	23.49	5.99	8.05	14.5	3.57	5.19	4.21	8.76	5.5	5.64	14.72	7.41	8.39	24.74	28.2	17.52
36148	chr2	71897080	71898080	22676	Pdk1	11.75	4.07	1.22	-0.74	11.75	6.21	8.78	10.34	4.07	10.78	8.59	15.88	7.14	6.22	5.26	4.38	12.1	9.87	11.04	5.29	14.69	4.68	6.13	1.4
53613	chr6	64649452	64650452	-79173	Atoh1	33.01	28.46	-0.15	-0.12	33.01	18.86	14.99	9.78	28.46	37.13	22.54	39.36	27.35	15.56	13.67	14.23	11	19.74	13.49	11.65	4.2	27.41	25.75	32.23
17401	chr13	60683683	60684683	81972	Dapk1	38.61	7.78	1.91	-3.39	38.61	23.08	22.21	19.15	7.78	39.52	30.05	46.27	36.87	17.63	14.73	17.51	30.79	18.33	25.76	25.41	6.29	4.68	6.74	11.91
15673	chr12	117486192	117487192	-29787	Rapgef5	83.33	29.98	1.12	-3.48	83.33	10.56	28.21	23.6	29.98	85.03	82.11	82.86	20.22	7.26	4.21	30.65	28.59	25.38	23.3	32.82	14.69	25.4	33.72	30.83
7993	chr10	102434963	102435963	54955	Nts	16.2	20.32	-0.67	-0.62	16.2	8.49	9.4	5.86	20.32	10.78	15.03	22.79	11.89	7.26	6.31	10.95	8.8	8.46	4.91	8.47	4.2	18.05	28.2	14.71
28089	chr17	35046351	35047351	-106	Msh5	59.3	64.21	-0.49	-1.01	59.3	42.75	33.12	39.75	64.21	69.46	50.45	58	57.08	24.89	46.28	35.03	31.89	32.43	31.89	32.82	54.55	68.86	60.7	63.06
39194	chr2	171552863	171553863	409436	1700028P15Rik	20.85	6.56	1.33	-1.28	20.85	7	7	3.61	6.56	19.16	26.83	16.57	9.51	5.19	6.31	5.47	9.9	5.64	2.45	0	8.39	4.01	7.97	7.71
60631	chr8	36528015	36529015	39324	6430573F11Rik	13.02	30.06	-1.54	-2.38	13.02	8.26	6.63	6.91	30.06	17.96	10.73	10.36	5.95	8.3	10.52	7.66	6.6	5.64	12.26	8.47	0	15.38	40.47	34.33
33924	chr19	53903189	53904189	338	Pdcd4	96.88	105.46	-0.49	-1.52	96.88	37.46	33.9	35.63	105.46	98.2	87.48	104.96	55.9	21.78	34.71	40.5	32.99	28.2	26.98	21.18	58.74	101.62	120.18	94.59
28928	chr17	66101056	66102056	3	Ndufv2	110.57	106.39	-0.3	-0.77	110.57	49.67	47.8	47.97	106.39	114.97	101.43	115.32	73.73	32.15	43.13	49.26	56.08	38.07	34.34	50.82	58.74	98.28	111.59	109.3
45323	chr4	63307072	63308072	-36984	Orm1	25.01	12.58	0.63	-0.47	25.01	10.57	10.92	10.93	12.58	35.93	22.54	16.57	11.89	11.41	8.41	8.76	9.9	14.1	8.59	7.41	16.78	20.06	3.68	14.01
47475	chr4	137707117	137708117	112	Rap1gap	41.09	33.42	-0.04	-0.03	41.09	13.28	15.26	15.68	33.42	45.51	37.03	40.74	9.51	12.45	17.88	10.95	16.49	18.33	19.62	16.94	10.49	26.07	39.85	34.33
58724	chr7	114149013	114150013	-31732	Rras2	14.2	6.55	0.73	-0.46	14.2	7.35	7.63	14.38	6.55	14.37	17.17	11.05	9.51	6.22	6.31	6.57	12.1	4.23	7.36	12.71	23.08	6.69	7.36	5.61
51779	chr5	143112337	143113337	183	Rnf216	46.95	44.94	-0.32	-0.42	46.95	15.94	22.62	19.02	44.94	57.48	39.18	44.19	23.79	11.41	12.62	26.27	27.49	14.1	15.94	24.35	16.78	44.79	51.5	38.54
37851	chr2	132715905	132716905	25807	1110034G24Rik	17.59	8.25	0.73	-0.54	17.59	14.66	6.27	12.27	8.25	21.56	13.95	17.26	17.84	10.37	15.78	5.47	7.7	5.64	14.72	7.41	14.69	6.69	11.04	7.01
49217	chr5	46969061	46970061	-1013594	Slit2	10.57	31.9	-1.95	-3.72	10.57	4.42	4.44	4.68	31.9	8.38	15.03	8.29	5.95	4.15	3.16	4.38	3.3	5.64	2.45	5.29	6.29	31.42	40.47	23.82
64700	chr9	56151773	56152773	8797	Tspan3	8.84	10.38	-0.54	-0.31	8.84	4.68	8.36	7.21	10.38	7.19	9.66	9.67	3.57	4.15	6.31	6.57	4.4	14.1	3.68	11.65	6.29	8.02	14.72	8.41
40973	chr3	63870953	63871953	-20462	Plch1	19.37	15.22	-0.03	-0.01	19.37	14.2	13.95	10.77	15.22	13.17	16.64	28.31	23.79	8.3	10.52	12.04	14.29	15.51	12.26	11.65	8.39	12.03	19.62	14.01
52952	chr6	37657901	37658901	128228	Akr1d1	16.28	3.66	1.67	-1.38	16.28	5.47	3.76	4.33	3.66	13.17	12.88	22.79	5.95	5.19	5.26	5.47	4.4	1.41	2.45	6.35	4.2	2.67	5.52	2.8
26015	chr16	54682567	54683567	600170	Zpld1	35.08	12.31	1.15	-1.65	35.08	18.13	20.26	16.15	12.31	39.52	23.61	42.12	26.16	11.41	16.83	20.8	13.19	26.79	22.08	15.88	10.49	10.03	12.88	14.01
24143	chr15	93852995	93853995	73616	9430014N10Rik	26.16	22.03	-0.17	-0.11	26.16	26.8	19.13	4.63	22.03	23.95	14.49	40.05	42.81	18.67	18.93	13.14	23.09	21.15	8.59	5.29	0	24.74	19.62	21.72
21808	chr14	120296967	120297967	-8985	Mbnl2	32.74	47.81	-0.91	-1.9	32.74	11.24	12.95	7.83	47.81	41.92	25.22	31.07	19.03	3.11	11.57	12.04	9.9	16.92	9.81	5.29	8.39	44.79	60.09	38.54
54337	chr6	92787005	92788005	-81321	Prickle2	13.63	9.78	0.13	-0.06	13.63	8.14	10.82	12.88	9.78	9.58	11.27	20.03	11.89	7.26	5.26	8.76	11	12.69	12.26	15.88	10.49	5.35	8.58	15.41
65227	chr9	73867096	73868096	65971	Unc13c	57.65	16.82	1.4	-3.41	57.65	16.58	24.96	16.03	16.82	59.88	53.67	59.39	30.92	8.3	10.52	25.18	18.69	31.02	26.98	14.82	6.29	20.06	17.78	12.61
8299	chr10	112803260	112804260	-33992	Gm3942	12.55	10.03	-0.03	-0.01	12.55	7.11	5.69	4.45	10.03	9.58	8.05	20.03	3.57	8.3	9.47	8.76	5.5	2.82	4.91	4.24	4.2	8.02	12.26	9.81
53419	chr6	54039463	54040463	31	Chn2	46.71	29.27	0.36	-0.39	46.71	28.21	29.87	25.04	29.27	46.71	54.74	38.67	42.81	17.63	24.19	30.65	20.89	38.07	24.53	25.41	25.18	19.39	31.27	37.14
50652	chr5	106927252	106928252	-1862	Hfm1	8	20.41	-1.67	-1.91	8	4.72	0.36	3.04	20.41	9.58	12.34	2.07	4.76	4.15	5.26	1.09	0	0	4.91	2.12	2.1	20.06	25.75	15.41
20016	chr14	46397848	46398848	-7679	Bmp4	9.61	9.85	-0.36	-0.18	9.61	9.13	9.41	10.78	9.85	13.17	8.05	7.6	10.7	9.33	7.36	5.47	14.29	8.46	4.91	16.94	10.49	10.03	10.42	9.11
6892	chr10	69278554	69279554	65860	Rhobtb1	11.8	15.16	-0.73	-0.6	11.8	8.64	6.37	6.33	15.16	13.17	9.12	13.12	7.14	11.41	7.36	6.57	5.5	7.05	7.36	9.53	2.1	17.38	14.1	14.01
24425	chr15	101339226	101340226	-29626	Mir1941	7.56	10.61	-0.83	-0.54	7.56	7.5	8.78	6.56	10.61	7.19	8.59	6.91	4.76	9.33	8.41	7.66	8.8	9.87	4.91	8.47	6.29	14.04	7.97	9.81
969	chr1	44101944	44102944	-3	Tex30	116.4	98.95	-0.14	-0.22	116.4	69.6	71.66	59.78	98.95	140.12	89.63	119.46	92.76	50.82	65.22	70.06	65.97	78.95	61.32	57.17	60.84	85.57	100.56	110.71
61881	chr8	83862361	83863361	-37237	Adgrl1	12.85	12.45	-0.34	-0.19	12.85	11.06	8.57	7.39	12.45	13.17	10.2	15.19	15.46	10.37	7.36	10.95	7.7	7.05	7.36	12.71	2.1	19.39	6.74	11.21
34490	chr2	12293171	12294171	-7575	E030013I19Rik	33.39	8.88	1.6	-2.22	33.39	20.28	12.43	7.78	8.88	43.11	32.2	24.86	27.35	12.45	21.04	14.23	13.19	9.87	8.59	6.35	8.39	3.34	13.49	9.81
67682	chrX	106135724	106136724	-7051	Tlr13	23.85	8.68	1.08	-1.1	23.85	9.67	8.57	7.44	8.68	19.16	22	30.38	15.46	9.33	4.21	7.66	11	7.05	8.59	9.53	4.2	8.69	6.13	11.21
54286	chr6	91212277	91213277	13	Fbln2	15.82	17.61	-0.49	-0.37	15.82	17.99	10.03	18.95	17.61	10.78	16.64	20.03	23.79	22.82	7.36	12.04	11	7.05	22.08	18	16.78	10.7	23.91	18.22
38811	chr2	162430009	162431009	39696	Ptprtos	12.88	10.58	-0.06	-0.03	12.88	6.74	5.22	5.27	10.58	9.58	16.64	12.43	11.89	6.22	2.1	8.76	5.5	1.41	7.36	4.24	4.2	12.03	9.2	10.51
1501	chr1	64142285	64143285	-21396	Klf7	1.51	12.08	-3.54	-2.81	1.51	4.08	2.77	3.75	12.08	0	1.07	3.45	5.95	2.07	4.21	2.19	3.3	2.82	4.91	6.35	0	11.37	12.26	12.61
54047	chr6	83397451	83398451	3151	Mir6374	16.2	4.54	1.41	-1.04	16.2	6.61	7.42	8.25	4.54	22.75	13.42	12.43	8.32	5.19	6.31	6.57	4.4	11.28	11.04	7.41	6.29	4.68	1.23	7.71
36702	chr2	93014076	93015076	-14772	4631405J19Rik	38.82	34.11	-0.18	-0.18	38.82	29.21	25.6	28.66	34.11	38.32	33.27	44.88	33.3	24.89	29.45	28.46	28.59	19.74	19.62	30.7	35.67	26.74	44.76	30.83
43571	chr3	151537397	151538397	100015	Adgrl4	21.45	11.71	0.5	-0.35	21.45	6.21	4.97	3.69	11.71	21.56	19.32	23.48	7.14	5.19	6.31	4.38	7.7	2.82	3.68	5.29	2.1	20.06	7.36	7.71
25895	chr16	49855153	49856153	-1	Cd47	164.88	142.06	-0.15	-0.35	164.88	81.41	79.24	71.27	142.06	177.24	126.12	191.28	117.74	56.01	70.47	77.72	82.47	77.54	58.87	79.41	75.53	140.39	147.77	138.03
32783	chr19	19004795	19005795	-4178	Rorb	21.16	13.68	0.27	-0.16	21.16	10.11	11.08	6.66	13.68	20.36	18.25	24.86	8.32	5.19	16.83	10.95	11	11.28	7.36	4.24	8.39	12.03	22.69	6.31
49657	chr5	66932970	66933970	-34946	Limch1	29.72	5.47	2.03	-2.9	29.72	7.27	10.08	14.58	5.47	28.74	30.05	30.38	7.14	4.15	10.52	8.76	8.8	12.69	11.04	18	14.69	8.69	4.91	2.8
22917	chr15	44363641	44364641	-63970	Eny2	15.1	10.75	0.1	-0.05	15.1	9.65	10.55	9.77	10.75	19.16	7.51	18.64	5.95	9.33	13.67	10.95	6.6	14.1	6.13	10.59	12.59	8.69	11.65	11.91
946	chr1	43357892	43358892	-87359	Nck2	21.64	8.4	1.01	-0.91	21.64	21.74	18.96	8.61	8.4	14.37	18.78	31.76	38.06	13.48	13.67	16.42	16.49	23.97	11.04	10.59	4.2	8.02	7.36	9.81
13569	chr12	39223678	39224678	440467	Etv1	31.38	10.26	1.21	-1.57	31.38	10.53	5.53	6.2	10.26	32.33	20.39	41.43	10.7	9.33	11.57	8.76	2.2	5.64	12.26	6.35	0	10.03	11.65	9.11
67416	chrX	78277400	78278400	-31979	Gm14743	29.36	5.92	1.93	-2.76	29.36	7.19	5.53	5.91	5.92	23.95	26.83	37.29	5.95	10.37	5.26	9.85	1.1	5.64	6.13	7.41	4.2	6.02	6.13	5.61
40402	chr3	40540396	40541396	129	Intu	37.07	40.01	-0.46	-0.66	37.07	22.57	20.41	24.67	40.01	34.73	34.35	42.12	33.3	20.74	13.67	20.8	6.6	33.84	24.53	18	31.47	39.44	44.15	36.43
12166	chr11	108889331	108890331	-30518	Axin2	24.29	10.72	0.83	-0.79	24.29	20.33	28.52	24.17	10.72	33.53	19.32	20.03	28.54	12.45	19.99	26.27	29.69	29.61	20.85	28.59	23.08	8.69	12.26	11.21
1361	chr1	59602530	59603530	67804	Sumo1	5.22	11.18	-1.51	-1.13	5.22	6.86	3.29	6.57	11.18	2.4	9.12	4.14	5.95	6.22	8.41	7.66	2.2	0	4.91	12.71	2.1	12.7	11.04	9.81
31347	chr18	61489076	61490076	-4969	A530050N04Rik	16.97	19.76	-0.6	-0.56	16.97	12.46	13.01	16.96	19.76	19.16	14.49	17.26	15.46	11.41	10.52	9.85	16.49	12.69	9.81	15.88	25.18	24.07	18.39	16.82
30300	chr18	24443474	24444474	-14804	Mir187	39.54	11.2	1.43	-2.28	39.54	36.34	43.25	27.39	11.2	41.92	26.3	50.41	46.38	32.15	30.5	45.98	42.88	40.88	36.79	28.59	16.78	10.03	16.55	7.01
15522	chr12	111353065	111354065	24153	Cdc42bpb	21.65	20.43	-0.26	-0.18	21.65	20.84	23.39	31.39	20.43	22.75	21.47	20.72	24.97	22.82	14.73	25.18	15.39	29.61	33.11	23.29	37.76	11.37	23.3	26.63
23601	chr15	76368514	76369514	116	Hgh1	33.47	28.4	-0.14	-0.11	33.47	19.42	18.95	12.87	28.4	43.11	28.98	28.31	23.79	17.63	16.83	26.27	16.49	14.1	19.62	12.71	6.29	26.07	27.59	31.53
51820	chr5	144321348	144322348	-36075	Dmrt1i	15.42	15.2	-0.36	-0.23	15.42	14.75	11.9	16.31	15.2	14.37	13.95	17.95	20.22	12.45	11.57	16.42	6.6	12.69	18.4	11.65	18.88	10.03	11.04	24.52
12809	chr12	7670064	7671064	-290234	1700101O22Rik	18.34	17.83	-0.32	-0.21	18.34	6.26	4.91	1.82	17.83	21.56	13.42	20.03	8.32	5.19	5.26	2.19	5.5	7.05	1.23	4.24	0	13.37	13.49	26.63
55328	chr6	126752195	126753195	-12021	Kcna6	16.69	12.58	-0.01	0	16.69	11.82	9.3	9.7	12.58	13.17	13.42	23.48	16.65	9.33	9.47	10.95	9.9	7.05	12.26	6.35	10.49	14.71	10.42	12.61
53512	chr6	56912817	56913817	10615	Nt5c3	11.85	48.25	-2.36	-6.38	11.85	9.77	6.37	6.31	48.25	4.79	15.56	15.19	17.84	8.3	3.16	7.66	4.4	7.05	7.36	5.29	6.29	36.77	43.53	64.46
33038	chr19	27097548	27098548	-118436	Vldlr	9.64	18.76	-1.29	-1.45	9.64	8.97	3.61	4.15	18.76	11.98	10.73	6.21	15.46	8.3	3.16	2.19	4.4	4.23	6.13	2.12	4.2	17.38	22.07	16.82
41071	chr3	67514836	67515836	187	Rarres1	49.86	34.9	0.17	-0.15	49.86	35.65	22.67	23.58	34.9	33.53	55.28	60.77	46.38	30.08	30.5	24.08	24.19	19.74	23.3	26.47	20.98	24.74	38.63	41.34
64048	chr9	33886935	33887935	-154936	7630403G23Rik	14.57	13.46	-0.27	-0.16	14.57	9.68	13.75	15.44	13.46	9.58	13.42	20.72	15.46	7.26	6.31	7.66	20.89	12.69	22.08	11.65	12.59	14.71	11.65	14.01
41537	chr3	85793050	85794050	-47341	Fam160a1	13.26	6.88	0.55	-0.31	13.26	8.11	4.7	8.62	6.88	19.16	7.51	13.12	10.7	4.15	9.47	6.57	3.3	4.23	11.04	12.71	2.1	8.02	4.91	7.71
39428	chr2	179697922	179698922	255991	Cdh4	14.04	9.37	0.23	-0.11	14.04	8.1	11.08	12.58	9.37	14.37	13.95	13.81	10.7	5.19	8.41	8.76	13.19	11.28	13.49	11.65	12.59	7.35	6.74	14.01
29676	chr17	88610838	88611838	-15217	Ston1	23.27	10.72	0.77	-0.69	23.27	8.35	12.54	6.96	10.72	21.56	22	26.24	8.32	7.26	9.47	7.66	18.69	11.28	6.13	6.35	8.39	8.69	7.36	16.12
50413	chr5	99728466	99729466	94	A930011G23Rik	48.39	28.27	0.42	-0.52	48.39	28.74	22.72	22.63	28.27	59.88	49.37	35.91	39.25	26.97	19.99	19.7	23.09	25.38	18.4	22.23	27.27	26.74	30.04	28.03
51061	chr5	120560538	120561538	27575	Tpcn1	37.53	41.01	-0.45	-0.62	37.53	10.94	10.13	11.82	41.01	33.53	44.54	34.53	11.89	8.3	12.62	16.42	5.5	8.46	12.26	12.71	10.49	38.78	47.83	36.43
19081	chr14	7754578	7755578	-62879	Flnb	14.77	3.77	1.69	-1.21	14.77	5.17	3.34	3.04	3.77	9.58	16.1	18.64	7.14	4.15	4.21	3.28	1.1	5.64	4.91	2.12	2.1	0	4.29	7.01
27162	chr17	4034425	4035425	48070	4930470H14Rik	14.79	27.27	-1.26	-1.86	14.79	16.73	9.51	5.21	27.27	13.17	13.95	17.26	26.16	12.45	11.57	9.85	8.8	9.87	6.13	5.29	4.2	36.1	28.2	17.52
28346	chr17	45766481	45767481	32475	F630040K05Rik	14.04	30.33	-1.47	-2.68	14.04	22.12	12.9	15.44	30.33	11.98	12.88	17.26	39.25	16.59	10.52	17.51	9.9	11.28	22.08	13.76	10.49	26.07	36.18	28.73
23308	chr15	62990487	62991487	488621	Gm20740	16.13	4.28	1.55	-1.26	16.13	8.54	9.66	4.98	4.28	15.57	10.73	22.1	13.08	6.22	6.31	12.04	9.9	7.05	8.59	4.24	2.1	2.67	7.36	2.8
59587	chr7	142454429	142455429	-5883	Lsp1	22.1	24.15	-0.51	-0.51	22.1	7.65	8.67	8.82	24.15	29.94	12.88	23.48	8.32	6.22	8.41	8.76	8.8	8.46	8.59	5.29	12.59	20.06	25.75	26.63
48921	chr5	35361532	35362532	479	4930478P22Rik	15.17	21.28	-0.88	-0.92	15.17	13.16	10.91	9.34	21.28	23.95	9.12	12.43	15.46	12.45	11.57	13.14	5.5	14.1	12.26	3.18	12.59	24.07	20.85	18.92
49104	chr5	43225815	43226815	-7148	Cpeb2	11.2	5.33	0.7	-0.36	11.2	5.02	7.2	8.83	5.33	11.98	11.27	10.36	3.57	6.22	5.26	10.95	2.2	8.46	8.59	7.41	10.49	4.68	9.2	2.1
2341	chr1	92334740	92335740	129302	Mir6900	16.31	6.89	0.88	-0.63	16.31	5.77	7.11	6.37	6.89	11.98	20.39	16.57	4.76	5.19	7.36	5.47	8.8	7.05	8.59	4.24	6.29	5.35	5.52	9.81
25350	chr16	31347377	31348377	22587	AV205837	10.27	9.11	-0.18	-0.07	10.27	7.66	6.01	8.78	9.11	13.17	5.9	11.74	8.32	5.19	9.47	2.19	8.8	7.05	7.36	10.59	8.39	7.35	7.36	12.61
38041	chr2	138277981	138278981	-12	Btbd3	67.15	52.84	-0.01	-0.01	67.15	26.47	33.95	25.15	52.84	61.08	59.57	80.79	34.49	20.74	24.19	28.46	29.69	43.7	19.62	24.35	31.47	51.48	55.18	51.85
29173	chr17	73707897	73708897	2054	Galnt14	42.22	8.54	1.92	-3.76	42.22	7.33	17.65	22.47	8.54	45.51	30.05	51.1	9.51	10.37	2.1	19.7	12.1	21.15	29.44	23.29	14.69	10.03	8.58	7.01
14855	chr12	89242190	89243190	289300	Nrxn3	9.53	8.18	-0.15	-0.06	9.53	9.88	10.09	6.31	8.18	7.19	9.66	11.74	11.89	9.33	8.41	6.57	11	12.69	7.36	5.29	6.29	8.69	6.74	9.11
57126	chr7	51754036	51755036	-107479	Gas2	100.86	34.1	1.21	-4.69	100.86	47.24	75.71	40.81	34.1	101.79	89.63	111.17	74.92	36.3	30.5	62.4	85.77	78.95	52.74	48.7	20.98	36.1	31.88	34.33
10947	chr11	74584619	74585619	5039	Rap1gap2	23.7	6.67	1.47	-1.54	23.7	10.53	13.69	12.16	6.67	33.53	18.25	19.33	10.7	10.37	10.52	9.85	14.29	16.92	12.26	9.53	14.69	8.02	9.2	2.8
3827	chr1	159539459	159540459	16190	Tnr	11.97	5.27	0.83	-0.47	11.97	4.42	11.86	13.85	5.27	14.37	13.95	7.6	5.95	4.15	3.16	9.85	18.69	7.05	18.4	8.47	14.69	6.69	4.91	4.2
4589	chr1	181975177	181976177	44303	Enah	9.51	9.34	-0.3	-0.15	9.51	3.97	4.23	7.42	9.34	9.58	8.59	10.36	3.57	5.19	3.16	6.57	3.3	2.82	8.59	5.29	8.39	9.36	11.65	7.01
22506	chr15	28473678	28474678	270412	Dnah5	63.64	14	1.84	-4.79	63.64	9.92	5.23	4.9	14	56.29	43.47	91.15	13.08	9.33	7.36	6.57	7.7	1.41	7.36	1.06	6.29	13.37	15.33	13.31
2992	chr1	130437841	130438841	-15298	Cd55b	12.43	3.69	1.4	-0.93	12.43	3.37	4.85	3.75	3.69	11.98	12.88	12.43	5.95	2.07	2.1	9.85	3.3	1.41	4.91	4.24	2.1	4.68	4.29	2.1
57289	chr7	63315962	63316962	-103936	Chrna7	5.07	17.79	-2.15	-2.57	5.07	7.4	4.54	6.6	17.79	4.79	6.98	3.45	10.7	5.19	6.31	3.28	3.3	7.05	6.13	5.29	8.39	14.04	23.91	15.41
4409	chr1	176355032	176356032	-80220	Pld5	29.46	16.47	0.5	-0.41	29.46	10.95	6.94	6.33	16.47	14.37	33.27	40.74	11.89	6.22	14.73	8.76	2.2	9.87	7.36	9.53	2.1	14.04	22.07	13.31
45318	chr4	63233728	63234728	18816	Col27a1	23.02	22.58	-0.32	-0.26	23.02	15.48	9.25	10.41	22.58	29.94	17.71	21.41	21.41	15.56	9.47	8.76	7.7	11.28	12.26	8.47	10.49	17.38	25.14	25.22
57076	chr7	49758611	49759611	5	Htatip2	15.8	14.35	-0.19	-0.1	15.8	13.16	14.52	15.01	14.35	17.96	12.88	16.57	15.46	11.41	12.62	15.33	9.9	18.33	20.85	7.41	16.78	12.03	23.3	7.71
163	chr1	12397952	12398952	-27534	Mir6341	52.96	44.16	-0.1	-0.1	52.96	40.05	20.69	12.35	44.16	47.9	44.01	66.98	60.65	31.11	28.4	17.51	21.99	22.56	15.94	12.71	8.39	48.14	32.5	51.85
13148	chr12	24931786	24932786	-42646	Kidins220	31.39	6.97	1.84	-2.31	31.39	21.87	19.12	9.71	6.97	34.73	21.47	37.98	23.79	18.67	23.14	16.42	19.79	21.15	12.26	8.47	8.39	13.37	1.23	6.31
45526	chr4	71756572	71757572	443821	Tle1	12.6	41.45	-2.08	-5.51	12.6	6.22	7.94	9.95	41.45	9.58	12.34	15.88	7.14	4.15	7.36	10.95	4.4	8.46	9.81	13.76	6.29	34.76	39.85	49.75
53478	chr6	55716919	55717919	32848	Gm3279	12.15	10.77	-0.17	-0.08	12.15	8.19	4.96	7.42	10.77	11.98	8.59	15.88	4.76	11.41	8.41	8.76	3.3	2.82	8.59	3.18	10.49	14.71	9.2	8.41
53751	chr6	70871840	70872840	27825	Eif2ak3	13.41	17.2	-0.74	-0.58	13.41	5.06	10.45	18.17	17.2	16.77	4.83	18.64	4.76	7.26	3.16	8.76	9.9	12.69	13.49	13.76	27.27	16.05	11.04	24.52
12594	chr11	119299465	119300465	78	Eif4a3	42.21	62.05	-0.9	-2.32	42.21	33.9	30.15	19.13	62.05	39.52	47.76	39.36	54.71	23.85	23.14	27.37	36.29	26.79	18.4	18	20.98	70.2	61.31	54.65
12322	chr11	113611826	113612826	-7155	Sstr2	29.08	14.38	0.65	-0.66	29.08	11.76	10.34	12.4	14.38	26.35	23.61	37.29	15.46	12.45	7.36	9.85	9.9	11.28	9.81	12.71	14.69	12.03	12.88	18.22
1531	chr1	64956209	64957209	115	Plekhm3	62.37	41.01	0.24	-0.24	62.37	25.34	23.15	25.27	41.01	32.33	57.42	97.36	40.44	13.48	22.09	17.51	30.79	21.15	22.08	24.35	29.37	35.43	44.15	43.44
66555	chr9	119588643	119589643	-10127	Scn5a	17.18	10.76	0.3	-0.17	17.18	7.21	11.6	10.34	10.76	21.56	13.42	16.57	5.95	7.26	8.41	13.14	13.19	8.46	11.04	5.29	14.69	8.02	16.55	7.71
38845	chr2	163353457	163354457	44016	Jph2	37.28	10.92	1.39	-2.21	37.28	16.67	10.24	9.95	10.92	43.11	30.05	38.67	24.97	14.52	10.52	9.85	11	9.87	2.45	14.82	12.59	10.7	7.36	14.71
47280	chr4	133013002	133014002	1996	Ahdc1	41.48	27.34	0.25	-0.25	41.48	29.26	23.93	23.43	27.34	45.51	40.25	38.67	34.49	25.93	27.35	24.08	30.79	16.92	28.21	12.71	29.37	30.08	28.82	23.12
14627	chr12	82188937	82189937	19421	Sipa1l1	31.99	9.76	1.31	-1.82	31.99	20.06	15.25	7.13	9.76	33.53	23.08	39.36	30.92	14.52	14.73	12.04	15.39	18.33	9.81	5.29	6.29	8.69	12.88	7.71
1333	chr1	59236632	59237632	-39	Als2	55.61	58.73	-0.44	-0.85	55.61	38.69	30.62	42.63	58.73	56.29	50.45	60.08	52.33	29.04	34.71	26.27	37.39	28.2	40.47	37.06	50.35	55.49	62.54	58.16
61992	chr8	87536515	87537515	-26892	4933402J07Rik	19.18	19.81	-0.38	-0.31	19.18	10.08	13.01	10.71	19.81	17.96	20.93	18.64	8.32	12.45	9.47	13.14	13.19	12.69	11.04	10.59	10.49	20.72	18.39	20.32
14439	chr12	77238351	77239351	112	Fut8	113.36	146.76	-0.73	-3.84	113.36	54.21	52.29	46.46	146.76	117.36	109.48	113.25	83.25	39.41	39.97	52.54	54.98	49.34	39.25	51.88	48.25	137.05	148.38	154.85
51567	chr5	137024788	137025788	-5007	Vgf	14.18	12.12	-0.17	-0.08	14.18	7	11.49	14.72	12.12	19.16	12.34	11.05	9.51	6.22	5.26	16.42	11	7.05	14.72	8.47	20.98	10.7	16.55	9.11
38564	chr2	153998409	153999409	-9367	Bpifa2	17.45	7.26	0.86	-0.61	17.45	2.24	11.03	5.27	7.26	14.37	14.49	23.48	3.57	1.04	2.1	6.57	11	15.51	7.36	6.35	2.1	4.01	12.88	4.9
62170	chr8	94186271	94187271	7682	Mt1	19.99	25.02	-0.7	-0.82	19.99	11.17	10.92	19.05	25.02	19.16	21.47	19.33	17.84	8.3	7.36	6.57	12.1	14.1	24.53	9.53	23.08	22.06	26.37	26.63
46891	chr4	120259270	120260270	27491	Foxo6	62.13	9.97	2.28	-6.46	62.13	26.35	23.62	18.54	9.97	74.25	56.89	55.24	40.44	20.74	17.88	20.8	27.49	22.56	20.85	15.88	18.88	8.02	8.58	13.31
61949	chr8	85167393	85168393	15969	Cks1brt	33.99	7.76	1.71	-2.7	33.99	17.68	26.85	16.96	7.76	38.32	28.44	35.22	23.79	13.48	15.78	29.56	24.19	26.79	17.17	16.94	16.78	6.02	6.74	10.51
52524	chr6	21803528	21804528	48487	Tspan12	5.26	25.01	-2.57	-4.36	5.26	5.17	7.52	5.31	25.01	3.59	8.05	4.14	7.14	2.07	6.31	6.57	3.3	12.69	8.59	1.06	6.29	28.08	24.53	22.42
16668	chr13	35740784	35741784	-118	Cdyl	136.58	133.06	-0.32	-0.95	136.58	57.18	58.55	56.1	133.06	154.49	111.63	143.63	88.01	42.52	41.02	54.73	56.08	64.85	44.15	38.12	86.02	130.37	148.99	119.81
25979	chr16	52310749	52311749	141832	Alcam	20.84	12.48	0.4	-0.27	20.84	12.12	11.07	7.78	12.48	15.57	19.32	27.62	15.46	10.37	10.52	13.14	8.8	11.28	8.59	6.35	8.39	10.03	9.2	18.22
27777	chr17	26676032	26677032	136	Atp6v0e	35.63	36.44	-0.39	-0.47	35.63	18.17	18.08	14.32	36.44	41.92	31.13	33.84	35.68	7.26	11.57	12.04	25.29	16.92	13.49	10.59	18.88	45.46	28.82	35.03
1329	chr1	59119616	59120616	-20	Tmem237	90.62	95.72	-0.43	-1.16	90.62	50.9	41.68	34.62	95.72	94.61	82.65	94.6	70.17	39.41	43.13	41.6	43.98	39.47	41.7	30.7	31.47	95.6	106.07	85.48
36432	chr2	80388248	80389248	-2616	Gm13752	16.54	6.38	0.94	-0.67	16.54	7.69	2.66	5.5	6.38	13.17	15.03	21.41	9.51	8.3	5.26	3.28	3.3	1.41	4.91	5.29	6.29	4.68	11.65	2.8
28565	chr17	51346043	51347043	68555	Mir669a-6	25.05	14.51	0.41	-0.29	25.05	9.62	6	10.2	14.51	19.16	16.64	39.36	14.27	9.33	5.26	7.66	3.3	7.05	7.36	16.94	6.29	20.06	7.36	16.12
3728	chr1	156777553	156778553	-59143	Fam20b	43.83	14	1.27	-2.13	43.83	10.36	9.4	14.38	14	51.5	26.83	53.17	15.46	10.37	5.26	9.85	9.9	8.46	14.72	11.65	16.78	12.03	11.04	18.92
3568	chr1	152687011	152688011	-62294	Rgl1	27.77	42.88	-0.97	-1.92	27.77	16.32	16.97	11.28	42.88	29.94	25.76	27.62	16.65	20.74	11.57	17.51	16.49	16.92	15.94	7.41	10.49	53.48	38.01	37.14
39112	chr2	169610627	169611627	-22519	Tshz2	26.83	18.43	0.16	-0.11	26.83	9.79	13.8	14.38	18.43	29.94	28.44	22.1	9.51	9.33	10.52	6.57	16.49	18.33	14.72	11.65	16.78	24.74	16.55	14.01
54181	chr6	87838334	87839334	-75	Isy1	56.91	49.82	-0.14	-0.13	56.91	31.51	24.87	26.61	49.82	49.1	67.08	54.55	55.9	20.74	17.88	21.89	32.99	19.74	28.21	24.35	27.27	35.43	69.9	44.14
47126	chr4	128970783	128971783	-8828	Azin2	9.04	10.7	-0.61	-0.37	9.04	9.77	9.93	8.26	10.7	7.19	7.51	12.43	9.51	12.45	7.36	8.76	15.39	5.64	11.04	9.53	4.2	12.03	11.65	8.41
320	chr1	17450610	17451610	-150791	Pi15	122.38	64.3	0.55	-1.46	122.38	72.2	67.18	17.74	64.3	150.9	81.58	134.65	105.85	51.86	58.9	56.92	67.07	77.54	18.4	22.23	12.59	62.84	70.51	59.56
59541	chr7	141265812	141266812	112	Irf7	26.87	18.36	0.17	-0.12	26.87	14.2	13.17	12.11	18.36	31.14	22.54	26.93	23.79	8.3	10.52	13.14	16.49	9.87	11.04	12.71	12.59	16.71	20.85	17.52
41975	chr3	98226923	98227923	5267	Reg4	11.77	13.45	-0.61	-0.4	11.77	11.28	7.73	14.28	13.45	17.96	6.98	10.36	20.22	4.15	9.47	8.76	8.8	5.64	12.26	15.88	14.69	20.72	9.81	9.81
24994	chr16	20548056	20549056	0	Gm15760	74.35	63.8	-0.14	-0.19	74.35	47.36	42.62	45.28	63.8	89.82	57.96	75.27	68.98	37.34	35.76	40.5	45.08	42.29	36.79	48.7	50.35	66.85	60.09	64.46
58087	chr7	91063108	91064108	-27178	Dlg2	17.77	13.57	0.05	-0.03	17.77	7.45	9.98	6.43	13.57	11.98	26.83	14.5	11.89	3.11	7.36	7.66	11	11.28	9.81	5.29	4.2	7.35	16.55	16.82
45776	chr4	83570208	83571208	45163	Ccdc171	10.38	9.64	-0.27	-0.05	10.38	4.38	5.28	5.38	9.64	0	11.81	19.33	4.76	2.07	6.31	3.28	5.5	7.05	2.45	7.41	6.29	10.7	9.81	8.41
47249	chr4	132211522	132212522	234	Ythdf2	49.61	68.19	-0.8	-2.25	49.61	20.56	23.34	25.91	68.19	45.51	46.69	56.62	26.16	16.59	18.93	26.27	19.79	23.97	20.85	25.41	31.47	66.19	76.03	62.36
37932	chr2	135439328	135440328	143392	9630028H03Rik	72.96	56.96	0	0	72.96	33.11	19.48	20.25	56.96	85.03	60.64	73.2	52.33	22.82	24.19	21.89	15.39	21.15	26.98	21.18	12.59	62.17	58.25	50.45
20755	chr14	70599211	70600211	124	Fam160b2	49.46	50.89	-0.41	-0.66	49.46	24.05	22.57	21.21	50.89	59.88	38.1	50.41	27.35	30.08	14.73	17.51	21.99	28.2	18.4	13.76	31.47	50.81	47.21	54.65
2578	chr1	106583017	106584017	-36886	Mir3473f	13.12	28.95	-1.5	-2.54	13.12	7.05	5.22	10	28.95	8.38	17.17	13.81	10.7	5.19	5.26	8.76	5.5	1.41	11.04	8.47	10.49	26.07	30.66	30.13
52062	chr5	151023075	151024075	70968	Kl	25.26	19.34	0.03	-0.02	25.26	18.48	15.72	9.71	19.34	27.54	17.17	31.07	17.84	19.71	17.88	18.61	18.69	9.87	12.26	8.47	8.39	10.03	26.98	21.02
40048	chr3	29757587	29758587	121343	Mir21b	7.51	17.58	-1.58	-1.77	7.51	5.36	2.56	4.73	17.58	7.19	9.12	6.21	3.57	8.3	4.21	2.19	5.5	0	3.68	2.12	8.39	14.04	23.3	15.41
23301	chr15	62875989	62876989	603119	Gm20740	5.08	15.9	-2.03	-2.02	5.08	1.43	3.6	1.12	15.9	9.58	4.29	1.38	1.19	3.11	0	3.28	3.3	4.23	1.23	2.12	0	18.72	17.78	11.21
4716	chr1	185331647	185332647	-12	Bpnt1	39.52	30.93	-0.01	-0.01	39.52	23.97	18.59	17.82	30.93	50.3	36.49	31.76	33.3	20.74	17.88	22.99	18.69	14.1	13.49	12.71	27.27	34.1	30.66	28.03
12408	chr11	115627734	115628734	61	Slc25a19	59.49	60.23	-0.36	-0.53	59.49	37.06	38.7	37.16	60.23	77.84	58.5	42.12	46.38	28	36.81	48.16	34.09	33.84	36.79	24.35	50.35	47.47	63.15	70.07
52872	chr6	35133147	35134147	90	Cnot4	106.59	95.43	-0.21	-0.42	106.59	54.8	53.22	47.95	95.43	117.36	91.24	111.17	80.87	43.56	39.97	47.07	40.68	71.9	41.7	43.41	58.74	93.6	98.1	94.59
18496	chr13	103314824	103315824	19168	Mast4	6.3	9.73	-0.87	-0.52	6.3	3.73	3.97	2.99	9.73	4.79	8.59	5.52	5.95	2.07	3.16	5.47	2.2	4.23	3.68	5.29	0	6.69	14.1	8.41
37866	chr2	133113316	133114316	-167780	Fermt1	23.49	22.04	-0.27	-0.22	23.49	8.09	9.87	9.99	22.04	25.15	22.54	22.79	10.7	7.26	6.31	9.85	9.9	9.87	11.04	6.35	12.59	24.07	24.53	17.52
27443	chr17	13043538	13044538	8242	Gpr31b	14.38	13.14	-0.27	-0.16	14.38	11.39	7.99	7.38	13.14	16.77	9.12	17.26	14.27	6.22	13.67	10.95	8.8	4.23	7.36	10.59	4.2	12.7	14.1	12.61
1378	chr1	60409169	60410169	50	Abi2	98.16	88.92	-0.22	-0.36	98.16	50.43	43.31	46.99	88.92	119.76	79.43	95.29	74.92	30.08	46.28	47.07	56.08	26.79	35.57	55.06	50.35	66.19	111.59	88.98
57113	chr7	50847783	50848783	249093	4933405O20Rik	14.29	6.38	0.84	-0.53	14.29	16.2	15.51	11.23	6.38	21.56	7.51	13.81	21.41	11.41	15.78	15.33	14.29	16.92	14.72	8.47	10.49	2.67	7.36	9.11
49712	chr5	69511908	69512908	30239	Yipf7	18.54	11.7	0.32	-0.2	18.54	7.59	8.3	4.81	11.7	17.96	15.56	22.1	7.14	10.37	5.26	10.95	5.5	8.46	4.91	7.41	2.1	7.35	16.55	11.21
22206	chr15	11411524	11412524	-12366	Tars	9.21	13.86	-0.98	-0.77	9.21	7.21	5.17	5.9	13.86	5.99	6.44	15.19	5.95	7.26	8.41	4.38	5.5	5.64	6.13	5.29	6.29	11.37	14.1	16.12
34336	chr2	7087154	7088154	-6352	Celf2	12.91	5.86	0.77	-0.19	12.91	3.63	5.28	7.25	5.86	9.58	9.12	20.03	3.57	2.07	5.26	3.28	5.5	7.05	12.26	5.29	4.2	13.37	0	4.2
3797	chr1	158553860	158554860	48735	Mir488	29.52	13.91	0.71	-0.76	29.52	9.34	12.48	6.79	13.91	26.35	26.3	35.91	15.46	5.19	7.36	12.04	9.9	15.51	9.81	8.47	2.1	12.03	17.78	11.91
24029	chr15	89622228	89623228	-30805	Rabl2	8.9	10.4	-0.55	-0.32	8.9	10.59	9.04	8.02	10.4	9.58	10.2	6.91	11.89	8.3	11.57	10.95	7.7	8.46	6.13	9.53	8.39	12.03	7.97	11.21
7537	chr10	87492633	87493633	527	Ascl1	51.59	38.94	0.06	-0.05	51.59	22.37	19.26	18	38.94	56.29	51.52	46.96	27.35	15.56	24.19	26.27	13.19	18.33	17.17	13.76	23.08	28.08	41.08	47.65
61472	chr8	70130811	70131811	-16	Nr2c2ap	14.43	18.88	-0.78	-0.75	14.43	16.16	18.22	22.69	18.88	14.37	12.34	16.57	21.41	18.67	8.41	24.08	16.49	14.1	19.62	21.18	27.27	18.72	14.1	23.82
40845	chr3	58525164	58526164	-157	Eif2a	131.36	97.66	0.06	-0.08	131.36	84.35	80.97	71.43	97.66	146.11	105.73	142.25	121.31	56.01	75.73	77.72	89.07	76.13	69.91	70.94	73.43	101.62	92.58	98.79
25447	chr16	34421232	34422232	92295	Kalrn	21.48	7	1.28	-1.28	21.48	13.3	11.13	13.88	7	17.96	25.76	20.72	19.03	11.41	9.47	15.33	11	7.05	11.04	18	12.59	9.36	6.74	4.9
26167	chr16	59524424	59525424	30828	Crybg3	23.36	5.93	1.71	-1.96	23.36	11.13	18.07	12.1	5.93	16.77	23.61	29.69	16.65	7.26	9.47	20.8	16.49	16.92	11.04	8.47	16.78	5.35	6.13	6.31
5899	chr10	30200073	30201073	-33	Cenpw	80.06	80.27	-0.37	-0.67	80.06	53.52	57.83	64.49	80.27	55.09	69.77	115.32	74.92	43.56	42.07	50.35	58.28	64.85	65	52.94	75.53	81.56	87.07	72.17
32610	chr19	14128179	14129179	209657	Olfr1505	31.21	40.78	-0.75	-1.18	31.21	9.49	9.25	11.03	40.78	38.32	26.3	29	10.7	7.26	10.52	5.47	11	11.28	11.04	3.18	18.88	29.42	36.18	56.75
44349	chr4	24720544	24721544	130080	Klhl32	18.48	18.23	-0.37	-0.29	18.48	10.98	10.45	12.45	18.23	16.77	14.49	24.17	13.08	9.33	10.52	6.57	12.1	12.69	11.04	9.53	16.78	19.39	17.78	17.52
67042	chrX	38473187	38474187	-17227	Lamp2	78.17	63.13	-0.05	-0.06	78.17	40.73	32.38	28.43	63.13	85.03	63.86	85.62	77.3	24.89	19.99	38.31	26.39	32.43	22.08	27.53	35.67	59.5	71.74	58.16
52712	chr6	29693656	29694656	-58	Tspan33	57.76	43.29	0.05	-0.05	57.76	19.61	21	21.81	43.29	67.06	50.98	55.24	28.54	14.52	15.78	21.89	24.19	16.92	23.3	16.94	25.18	40.11	43.53	46.24
1311	chr1	58303563	58304563	25737	Aox2	5.81	17.7	-1.99	-2.41	5.81	7.95	5.96	7.37	17.7	4.79	6.44	6.21	7.14	8.3	8.41	4.38	12.1	1.41	7.36	8.47	6.29	12.03	21.46	19.62
49285	chr5	49999429	50000429	59067	Adgra3	20.72	5.09	1.61	-1.4	20.72	11.69	6.22	8.14	5.09	33.53	8.59	20.03	13.08	6.22	15.78	4.38	4.4	9.87	8.59	9.53	6.29	2.67	9.81	2.8
46481	chr4	106655346	106656346	4777	Pars2	42.64	10.29	1.69	-3.35	42.64	13.97	14.42	6.37	10.29	46.71	41.86	39.36	17.84	8.3	15.78	13.14	13.19	16.92	8.59	4.24	6.29	10.03	11.04	9.81
18487	chr13	103027302	103028302	267547	1700099I09Rik	18.67	10.93	0.41	-0.26	18.67	7.3	5.28	8.54	10.93	14.37	20.93	20.72	8.32	7.26	6.31	2.19	6.6	7.05	2.45	8.47	14.69	12.03	6.74	14.01
39886	chr3	22184936	22185936	-65934	Rprl2	20.05	5.95	1.38	-1.26	20.05	12.63	11.96	12.4	5.95	29.94	15.03	15.19	10.7	11.41	15.78	13.14	14.29	8.46	17.17	11.65	8.39	4.01	6.13	7.71
11081	chr11	77785055	77786055	8320	Myo18a	12.38	12.36	-0.34	-0.19	12.38	12.37	9.87	8.77	12.36	11.98	8.59	16.57	13.08	11.41	12.62	12.04	7.7	9.87	7.36	8.47	10.49	16.05	9.81	11.21
58659	chr7	112299519	112300519	-68289	Micalcl	59.05	23.71	0.96	-1.88	59.05	36.17	33.01	25.26	23.71	79.04	45.62	52.48	59.46	28	21.04	30.65	27.49	40.88	29.44	19.06	27.27	20.06	25.14	25.92
25268	chr16	29644581	29645581	65747	Opa1	4.38	11.01	-1.72	-1.38	4.38	4.96	3.45	4.9	11.01	4.79	2.15	6.21	2.38	9.33	3.16	2.19	1.1	7.05	7.36	1.06	6.29	10.7	10.42	11.91
15993	chr13	12702814	12703814	-52919	Gpr137b-ps	15.6	14.62	-0.22	-0.12	15.6	11.02	9.51	5.86	14.62	8.38	17.71	20.72	14.27	9.33	9.47	5.47	13.19	9.87	4.91	8.47	4.2	13.37	17.17	13.31
62338	chr8	102983512	102984512	-198901	Cdh11	34.31	9	1.51	-2.28	34.31	14.69	14.94	16.37	9	43.11	22.54	37.29	19.03	14.52	10.52	10.95	9.9	23.97	26.98	11.65	10.49	10.7	8.58	7.71
24442	chr15	102017522	102018522	-10194	Krt18	41.47	20.35	0.66	-0.84	41.47	7.11	8	9.18	20.35	56.29	32.2	35.91	3.57	8.3	9.47	8.76	11	4.23	8.59	8.47	10.49	21.39	16.55	23.12
59117	chr7	127253834	127254834	6333	Dctpp1	66.53	76.86	-0.56	-1.43	66.53	39.81	35.72	42.66	76.86	63.47	67.08	69.05	54.71	35.26	29.45	49.26	29.69	28.2	34.34	30.7	62.94	70.2	74.19	86.18
48796	chr5	30929800	30930800	8741	Khk	9.93	14.5	-0.83	-0.6	9.93	6.84	7.84	6.74	14.5	16.77	7.51	5.52	5.95	11.41	3.16	7.66	8.8	7.05	8.59	9.53	2.1	10.03	11.04	22.42
52832	chr6	34101637	34102637	72689	Lrguk	11.9	10.2	-0.15	-0.07	11.9	7.94	6.27	8.01	10.2	14.37	7.51	13.81	7.14	9.33	7.36	6.57	6.6	5.64	6.13	7.41	10.49	10.7	12.88	7.01
11366	chr11	87629533	87630533	12869	Hsf5	7.74	3.77	0.71	-0.3	7.74	5.41	5.64	3.39	3.77	7.19	9.12	6.91	4.76	7.26	4.21	3.28	6.6	7.05	4.91	1.06	4.2	5.35	2.45	3.5
61317	chr8	64323520	64324520	-118012	Tll1	46.46	7.97	2.15	-1.72	46.46	25.36	23.19	8.65	7.97	37.13	35.96	66.29	33.3	23.85	18.93	28.46	24.19	16.92	12.26	7.41	6.29	12.7	9.81	1.4
34039	chr19	57452528	57453528	122	Trub1	26.45	25.81	-0.3	-0.26	26.45	17.04	17.61	16.49	25.81	22.75	28.98	27.62	24.97	11.41	14.73	16.42	20.89	15.51	22.08	12.71	14.69	30.75	26.37	20.32
66302	chr9	111170105	111171105	52494	Lrrfip2	22.03	4.27	1.98	-2.1	22.03	5.03	4.7	1.41	4.27	26.35	15.56	24.17	3.57	4.15	7.36	6.57	3.3	4.23	0	4.24	0	4.68	6.74	1.4
48236	chr5	5693652	5694652	-63	Steap2	77.58	70.31	-0.22	-0.35	77.58	37.73	34.69	33.11	70.31	88.62	63.33	80.79	54.71	29.04	29.45	32.84	37.39	33.84	39.25	30.7	29.37	64.85	80.93	65.16
47543	chr4	139282688	139283688	27520	Pqlc2	57.35	24.2	0.9	-1.78	57.35	35.37	35.68	18.65	24.2	61.08	58.5	52.48	47.57	25.93	32.61	24.08	40.68	42.29	15.94	14.82	25.18	20.06	29.43	23.12
9359	chr11	19670675	19671675	-253267	Spred2	19.39	13.51	0.17	-0.1	19.39	12.47	10.7	7.08	13.51	14.37	18.25	25.55	15.46	10.37	11.57	14.23	6.6	11.28	8.59	6.35	6.29	13.37	11.04	16.12
28139	chr17	35969175	35970175	75	Abcf1	57.14	68.9	-0.61	-1.38	57.14	49.51	43.41	43.56	68.9	46.71	66.01	58.69	70.17	37.34	41.02	38.31	43.98	47.93	52.74	33.88	44.06	56.83	79.1	70.77
11192	chr11	81119802	81120802	32601	Asic2	33.45	9.13	1.49	-2.25	33.45	15.4	14.94	15.21	9.13	35.93	35.42	29	19.03	12.45	14.73	14.23	16.49	14.1	17.17	13.76	14.69	8.02	11.65	7.71
40085	chr3	30647361	30648361	-25	Lrriq4	41.05	20.23	0.66	-0.87	41.05	28.41	26.17	19.96	20.23	35.93	40.25	46.96	39.25	21.78	24.19	20.8	25.29	32.43	28.21	21.18	10.49	14.71	21.46	24.52
61645	chr8	75315607	75316607	102163	Rasd2	11.22	16.74	-0.91	-0.85	11.22	10.82	9.56	13.58	16.74	9.58	12.34	11.74	9.51	13.48	9.47	15.33	7.7	5.64	12.26	18	10.49	16.05	20.85	13.31
3877	chr1	161034293	161035293	56	Zbtb37	134.16	138.58	-0.41	-1.45	134.16	77.11	77.54	75.88	138.58	144.91	113.24	144.32	105.85	52.89	72.58	63.49	100.06	69.08	76.04	59.29	92.31	143.07	146.54	126.12
46278	chr4	100478494	100479494	127	Ube2u	17.8	10.53	0.38	-0.21	17.8	10.77	10.7	5.97	10.53	14.37	10.73	28.31	16.65	8.3	7.36	14.23	6.6	11.28	7.36	6.35	4.2	13.37	4.91	13.31
21197	chr14	87510702	87511702	94619	Tdrd3	10.1	14.03	-0.85	-0.65	10.1	3.68	6.38	2.22	14.03	15.57	6.44	8.29	4.76	3.11	3.16	3.28	8.8	7.05	2.45	2.12	2.1	10.03	15.94	16.12
10314	chr11	53430327	53431327	4	Uqcrq	88.83	103.28	-0.57	-1.8	88.83	46.28	35.42	46	103.28	104.19	74.6	87.7	67.79	33.19	37.87	32.84	39.58	33.84	45.38	33.88	58.74	97.61	123.24	88.98
38935	chr2	165215149	165216149	19088	Cdh22	20.79	20.3	-0.32	-0.25	20.79	12.42	10.5	7.96	20.3	23.95	17.71	20.72	14.27	11.41	11.57	9.85	13.19	8.46	12.26	9.53	2.1	24.74	21.46	14.71
12385	chr11	115186935	115187935	-52	Tmem104	39.54	45.19	-0.55	-0.89	39.54	29.71	24.43	23.68	45.19	47.9	37.57	33.15	36.87	22.82	29.45	31.74	17.59	23.97	18.4	19.06	33.57	44.12	46.6	44.84
48938	chr5	35773739	35774739	16359	Ablim2	18.07	7.56	0.95	-0.76	18.07	14.04	21.05	29.95	7.56	19.16	19.86	15.19	11.89	19.71	10.52	22.99	17.59	22.56	31.89	28.59	29.37	5.35	6.13	11.21
14768	chr12	86078809	86079809	-268	Tgfb3	46.92	60.55	-0.73	-1.48	46.92	24.43	22.78	26.19	60.55	57.48	46.69	36.6	35.68	17.63	19.99	16.42	20.89	31.02	26.98	20.12	31.47	65.52	45.37	70.77
37433	chr2	120044011	120045011	11078	Pla2g4b	7	17.31	-1.65	-1.85	7	11.67	8.25	13.39	17.31	7.19	9.66	4.14	13.08	11.41	10.52	6.57	5.5	12.69	15.94	9.53	14.69	16.71	18.39	16.82
19054	chr13	120168026	120169026	28280	Gm20767	9.49	5.3	0.43	-0.19	9.49	2.88	2.92	0.71	5.3	8.38	6.98	13.12	2.38	3.11	3.16	5.47	3.3	0	0	2.12	0	4.68	4.91	6.31
61564	chr8	71725055	71726055	126	Fcho1	40	24.23	0.36	-0.4	40	17.32	16.4	18.66	24.23	38.32	35.42	46.27	23.79	15.56	12.62	17.51	17.59	14.1	15.94	19.06	20.98	22.06	23.3	27.33
19655	chr14	28662980	28663980	152075	Wnt5a	10.77	12.77	-0.6	-0.36	10.77	4.73	7.58	5.2	12.77	4.79	17.17	10.36	4.76	3.11	6.31	5.47	8.8	8.46	6.13	3.18	6.29	6.69	19.01	12.61
65074	chr9	68016248	68017248	8966	Gm20745	6.7	6.17	-0.11	-0.03	6.7	7.55	8.83	6.72	6.17	5.99	8.59	5.52	5.95	8.3	8.41	10.95	9.9	5.64	8.59	5.29	6.29	6.69	10.42	1.4
12295	chr11	112869581	112870581	-44953	1700012H19Rik	28.9	13.84	0.73	-0.75	28.9	11.87	10.4	7.02	13.84	29.94	33.27	23.48	9.51	13.48	12.62	10.95	13.19	7.05	7.36	7.41	6.29	9.36	15.33	16.82
2530	chr1	105411722	105412722	-55512	Rnf152	27.78	14.2	0.59	-0.57	27.78	8.16	10.5	14.68	14.2	26.35	25.22	31.76	11.89	3.11	9.47	14.23	8.8	8.46	20.85	10.59	12.59	17.38	14.72	10.51
15968	chr13	12165162	12166162	20826	Gm10336	10.29	21.47	-1.43	-1.79	10.29	7.59	4.65	5.21	21.47	10.78	6.98	13.12	7.14	10.37	5.26	2.19	3.3	8.46	6.13	5.29	4.2	28.75	15.33	20.32
59662	chr7	144678330	144679330	59762	Ano1	13.64	12.28	-0.18	-0.09	13.64	8.24	9.98	11.63	12.28	14.37	18.25	8.29	14.27	4.15	6.31	10.95	7.7	11.28	8.59	9.53	16.78	13.37	12.26	11.21
6682	chr10	61965159	61966159	13449	Col13a1	40.09	12.4	1.33	-2.27	40.09	27.88	27.11	19.65	12.4	43.11	34.35	42.81	52.33	16.59	14.73	27.37	28.59	25.38	22.08	18	18.88	15.38	9.2	12.61
49928	chr5	76760047	76761047	-80052	C530008M17Rik	10.51	24.26	-1.58	-2.38	10.51	9.89	9.3	9.06	24.26	8.38	10.73	12.43	11.89	7.26	10.52	10.95	9.9	7.05	6.13	6.35	14.69	25.4	21.46	25.92
42939	chr3	131482275	131483275	-81993	Papss1	8.61	15.18	-1.17	-0.95	8.61	6.61	6.53	10.93	15.18	7.19	14.49	4.14	8.32	5.19	6.31	10.95	4.4	4.23	15.94	6.35	10.49	12.7	10.42	22.42
40909	chr3	61002393	61003393	108	P2ry1	162.25	108.25	0.22	-0.55	162.25	75.32	83.9	69.46	108.25	176.05	142.22	168.49	115.36	63.27	47.33	72.25	83.57	95.87	87.08	73.06	48.25	96.94	122.02	105.8
57765	chr7	79594571	79595571	22586	Rhcg	10.74	10.12	-0.26	-0.13	10.74	10.03	11.65	9.96	10.12	8.38	10.73	13.12	15.46	6.22	8.41	9.85	11	14.1	2.45	16.94	10.49	8.02	10.42	11.91
59103	chr7	126949471	126950471	-389	Asphd1	32.61	33.65	-0.4	-0.49	32.61	22.4	19.17	21.69	33.65	29.94	30.59	37.29	20.22	24.89	22.09	21.89	18.69	16.92	35.57	14.82	14.69	35.43	31.88	33.63
34459	chr2	11447074	11448074	-49074	8030442B05Rik	15.48	7.28	0.7	-0.47	15.48	9.28	7	6.79	7.28	14.37	13.42	18.64	22.6	1.04	4.21	6.57	8.8	5.64	9.81	6.35	4.2	6.69	6.74	8.41
46657	chr4	111961024	111962024	-11403	Skint7	10.55	9.29	-0.22	-0.1	10.55	4.67	3.97	4.45	9.29	10.78	9.12	11.74	3.57	6.22	4.21	4.38	3.3	4.23	4.91	6.35	2.1	6.69	8.58	12.61
5001	chr1	193859387	193860387	-352357	Mir205	18.34	34.35	-1.28	-2.3	18.34	8.54	6.37	8.54	34.35	21.56	13.42	20.03	13.08	5.19	7.36	8.76	3.3	7.05	2.45	8.47	14.69	44.79	28.82	29.43
58128	chr7	92698548	92699548	-29136	Pcf11	11.34	9.44	-0.14	-0.06	11.34	13.99	11.34	25.21	9.44	7.19	7.51	19.33	19.03	13.48	9.47	9.85	14.29	9.87	28.21	24.35	23.08	4.68	11.04	12.61
25581	chr16	38562452	38563452	138	Tmem39a	49.52	52.05	-0.43	-0.71	49.52	30.7	34.43	40.52	52.05	58.68	42.93	46.96	35.68	25.93	30.5	28.46	39.58	35.25	40.47	34.94	46.16	51.48	52.12	52.55
60300	chr8	25719695	25720695	147	Plpp5	45.99	50.73	-0.49	-0.82	45.99	30.37	25.86	29.06	50.73	43.11	52.06	42.81	45.19	25.93	19.99	25.18	24.19	28.2	28.21	25.41	33.57	53.48	44.76	53.95
30024	chr18	12941100	12942100	241	Osbpl1a	56.68	63.42	-0.52	-0.95	56.68	27.8	27.83	21.89	63.42	40.72	69.23	60.08	33.3	26.97	23.14	33.93	24.19	25.38	24.53	24.35	16.78	68.86	62.54	58.86
51463	chr5	134435544	134436544	20218	Gtf2ird1	18.65	7.17	0.98	-0.79	18.65	15.14	13.11	17.24	7.17	14.37	13.95	27.62	21.41	13.48	10.52	9.85	15.39	14.1	15.94	10.59	25.18	4.68	9.81	7.01
14235	chr12	71309245	71310245	-139	Dact1	60.52	68.98	-0.55	-1.24	60.52	22.76	18.9	23.72	68.98	70.66	51.52	59.39	36.87	11.41	19.99	22.99	15.39	18.33	19.62	15.88	35.67	64.18	64.99	77.77
11696	chr11	96943458	96944458	61	Pnpo	45.59	45.1	-0.32	-0.41	45.59	21.05	25.49	24.21	45.1	51.5	44.54	40.74	29.73	16.59	16.83	22.99	25.29	28.2	22.08	23.29	27.27	53.48	40.47	41.34
4108	chr1	167337113	167338113	-12378	Aldh9a1	20.22	9.62	0.74	-0.47	20.22	12.37	12.64	8.77	9.62	25.15	8.59	26.93	13.08	12.45	11.57	9.85	15.39	12.69	7.36	6.35	12.59	13.37	14.1	1.4
28107	chr17	35379447	35380447	330	H2-Q4	30.83	34.19	-0.51	-0.65	30.83	22.44	18.4	16.67	34.19	25.15	30.05	37.29	38.06	14.52	14.73	16.42	27.49	11.28	18.4	14.82	16.78	28.75	37.4	36.43
29295	chr17	79163745	79164745	112339	Qpct	19.78	11.38	0.43	-0.29	19.78	9.83	11.91	11.7	11.38	19.16	18.78	21.41	19.03	5.19	5.26	10.95	12.1	12.69	9.81	10.59	14.69	14.71	6.13	13.31
45300	chr4	62944161	62945161	-20913	Zfp618	14.4	7.32	0.61	-0.37	14.4	12.86	8.57	17.24	7.32	11.98	13.95	17.26	16.65	10.37	11.57	8.76	9.9	7.05	8.59	13.76	29.37	6.02	6.13	9.81
37584	chr2	125384137	125385137	121801	Fbn1	11.21	4.44	1.03	-0.61	11.21	5.02	7.68	5.85	4.44	10.78	11.81	11.05	3.57	6.22	5.26	5.47	7.7	9.87	4.91	4.24	8.39	5.35	3.07	4.9
15774	chr13	3944518	3945518	331	Ucn3	25.27	15.2	0.38	-0.3	25.27	7.98	11.02	11.58	15.2	26.35	17.71	31.76	8.32	10.37	5.26	7.66	9.9	15.51	14.72	9.53	10.49	16.71	13.49	15.41
48886	chr5	33894836	33895836	3635	Mir7024	10.67	8	0.07	-0.03	10.67	7.78	6.16	9.24	8	11.98	9.66	10.36	3.57	14.52	5.26	10.95	3.3	4.23	9.81	7.41	10.49	5.35	11.65	7.01
32025	chr18	81646507	81647507	345073	Mir5127	13.67	6.48	0.65	-0.36	13.67	5.11	5.64	3.75	6.48	7.19	14.49	19.33	5.95	6.22	3.16	5.47	4.4	7.05	4.91	6.35	0	4.01	9.81	5.61
27730	chr17	25570379	25571379	68	2810468N07Rik	42.3	44.62	-0.44	-0.6	42.3	26.43	24.5	33.58	44.62	53.89	44.01	29	26.16	37.34	15.78	19.7	24.19	29.61	34.34	34.94	31.47	44.79	43.53	45.54
8494	chr10	119482628	119483628	29094	Grip1	24.55	10.4	0.85	-0.85	24.55	7.14	8.47	8.48	10.4	29.94	20.93	22.79	13.08	5.19	3.16	8.76	11	5.64	8.59	8.47	8.39	10.7	8.58	11.91
1188	chr1	54665656	54666656	-108472	Pgap1	12.97	11.94	-0.26	-0.13	12.97	9.19	8.36	4.68	11.94	21.56	6.98	10.36	11.89	6.22	9.47	8.76	12.1	4.23	2.45	5.29	6.29	12.7	9.81	13.31
47778	chr4	148151337	148152337	88	Fbxo6	45.66	45.67	-0.35	-0.45	45.66	51.01	45.38	37.07	45.67	40.72	52.06	44.19	72.55	35.26	45.23	44.88	36.29	54.98	34.34	30.7	46.16	46.8	55.18	35.03
31119	chr18	54846482	54847482	143198	Zfp608	53.51	36.59	0.19	-0.2	53.51	31.56	35.58	7.97	36.59	56.29	53.13	51.1	57.08	18.67	18.93	27.37	38.49	40.88	4.91	12.71	6.29	30.08	35.56	44.14
42478	chr3	116835554	116836554	-23513	Frrs1	42.38	34.72	-0.09	-0.07	42.38	11.91	13.74	19.13	34.72	47.9	34.35	44.88	10.7	15.56	9.47	14.23	14.29	12.69	18.4	18	20.98	36.1	43.53	24.52
45357	chr4	64276773	64277773	-670	Gm11217	14.04	24.5	-1.15	-1.62	14.04	11.63	8.83	4.75	24.5	14.37	13.95	13.81	11.89	10.37	12.62	9.85	11	5.64	3.68	8.47	2.1	25.4	26.37	21.72
46707	chr4	114947087	114948087	-21574	Foxe3	17.39	14.28	-0.08	-0.04	17.39	16.73	11.23	10.98	14.28	15.57	9.66	26.93	17.84	17.63	14.73	10.95	14.29	8.46	17.17	5.29	10.49	12.7	14.72	15.41
54936	chr6	114899386	114900386	21935	Vgll4	41.28	18.86	0.79	-1.11	41.28	33.8	32.81	23.73	18.86	34.73	45.62	43.5	60.65	19.71	21.04	35.03	35.19	28.2	26.98	16.94	27.27	12.7	26.37	17.52
18462	chr13	102506920	102507920	-186127	Cd180	13.03	3.2	1.61	-1.1	13.03	6.51	7.16	8.13	3.2	16.77	11.27	11.05	5.95	6.22	7.36	8.76	9.9	2.82	8.59	7.41	8.39	2.67	5.52	1.4
11274	chr11	84671227	84672227	48705	1700109G15Rik	21.36	4.19	1.93	-2.11	21.36	9.49	6.27	11.12	4.19	23.95	16.64	23.48	10.7	7.26	10.52	3.28	9.9	5.64	12.26	14.82	6.29	4.68	3.68	4.2
29003	chr17	67988751	67989751	14857	Arhgap28	72.72	32.72	0.78	-1.72	72.72	45	42.31	35.02	32.72	82.63	59.57	75.96	70.17	26.97	37.87	41.6	37.39	47.93	28.21	28.59	48.25	38.78	35.56	23.82
23760	chr15	80407858	80408858	30245	Gm31369	17.44	5.61	1.26	-1.05	17.44	6.22	13.32	12.93	5.61	11.98	18.25	22.1	7.14	4.15	7.36	9.85	13.19	16.92	13.49	12.71	12.59	5.35	7.97	3.5
23406	chr15	67095017	67096017	81365	St3gal1	4.95	17.79	-2.28	-2.71	4.95	11.28	4.23	8.82	17.79	1.2	5.37	8.29	11.89	10.37	11.57	5.47	4.4	2.82	8.59	5.29	12.59	17.38	17.78	18.22
61422	chr8	68766440	68767440	-26989	Ints10	26.4	24.33	-0.24	-0.19	26.4	16.76	10.87	15.32	24.33	22.75	19.86	36.6	17.84	12.45	19.99	13.14	11	8.46	12.26	14.82	18.88	24.74	25.14	23.12
50073	chr5	86191014	86192014	6387	Gnrhr	25.7	16.71	0.25	-0.18	25.7	6.9	10.71	4.4	16.71	29.94	20.93	26.24	7.14	7.26	6.31	9.85	11	11.28	3.68	7.41	2.1	22.73	14.1	13.31
16314	chr13	24268266	24269266	12024	Carmil1	23.8	5.36	1.79	-1.88	23.8	5.92	7.58	8.43	5.36	34.73	11.81	24.86	8.32	1.04	8.41	6.57	7.7	8.46	7.36	9.53	8.39	2.67	4.29	9.11
48427	chr5	15906163	15907163	-22897	4930519H02Rik	40.38	8.36	1.86	-3.21	40.38	18.68	12.38	3.4	8.36	45.51	30.05	45.57	22.6	14.52	18.93	15.33	7.7	14.1	4.91	3.18	2.1	6.69	3.68	14.71
41799	chr3	93446851	93447851	5021	Tchh	78.71	86.18	-0.5	-1.28	78.71	33.17	35.67	30.67	86.18	85.03	60.64	90.46	53.52	20.74	25.24	27.37	27.49	52.16	39.25	33.88	18.88	71.53	88.91	98.09
32247	chr19	4125553	4126553	93	Tmem134	59.69	64.32	-0.46	-0.92	59.69	35.29	34.63	36.05	64.32	71.86	54.74	52.48	54.71	25.93	25.24	42.69	32.99	28.2	35.57	20.12	52.45	60.17	66.22	66.56
67971	chrX	141175092	141176092	218685	Atg4a	14.26	13.22	-0.21	-0.1	14.26	4.39	5.02	2.63	13.22	7.19	15.56	20.03	4.76	1.04	7.36	2.19	4.4	8.46	3.68	2.12	2.1	9.36	18.39	11.91
63106	chr8	123948685	123949685	80	Nup133	22.45	39.7	-1.19	-2.42	22.45	19.46	17.86	26.62	39.7	31.14	18.25	17.95	24.97	17.63	15.78	22.99	16.49	14.1	20.85	29.65	29.37	40.78	40.47	37.84
16216	chr13	21530494	21531494	120	Zkscan8	54.17	63.34	-0.59	-1.3	54.17	32.94	33.49	35.9	63.34	62.27	47.76	52.48	47.57	20.74	30.5	30.65	37.39	32.43	31.89	31.76	44.06	64.85	55.8	69.37
65190	chr9	72836426	72837426	29652	Prtg	22.81	12.98	0.48	-0.38	22.81	11.63	12.64	6.74	12.98	23.95	18.25	26.24	11.89	9.33	13.67	12.04	13.19	12.69	1.23	10.59	8.39	10.03	13.49	15.41
53366	chr6	52584039	52585039	55761	Hibadh	13.35	5.5	0.96	-0.62	13.35	7.31	5.9	5.51	5.5	11.98	12.88	15.19	8.32	5.19	8.41	5.47	6.6	5.64	4.91	9.53	2.1	8.02	4.29	4.2
41010	chr3	65635703	65636703	-23085	Mir8120	26.6	12.47	0.7	-0.68	26.6	11.78	7.99	6.84	12.47	29.94	18.78	31.07	15.46	7.26	12.62	9.85	9.9	4.23	3.68	6.35	10.49	12.7	8.58	16.12
63809	chr9	25176956	25177956	-25675	Herpud2	7.3	28.49	-2.32	-4.42	7.3	4.33	4.18	4.39	28.49	4.79	10.2	6.91	3.57	4.15	5.26	3.28	2.2	7.05	3.68	5.29	4.2	29.42	24.53	31.53
46309	chr4	101264600	101265600	182	Jak1	72.83	78.25	-0.47	-1.12	72.83	48.72	39.81	35.8	78.25	75.45	67.08	75.96	67.79	36.3	42.07	41.6	43.98	33.84	36.79	34.94	35.67	83.57	79.71	71.47
28433	chr17	47694516	47695516	-191	Frs3	73.4	73.55	-0.36	-0.73	73.4	42.98	32.6	33.51	73.55	80.24	68.16	71.81	46.38	37.34	45.23	35.03	37.39	25.38	33.11	29.65	37.76	79.56	76.64	64.46
22092	chr15	7641702	7642702	-167846	Gdnf	13.35	8.95	0.15	-0.07	13.35	5.83	7.05	2.28	8.95	14.37	9.12	16.57	5.95	2.07	9.47	6.57	3.3	11.28	3.68	1.06	2.1	4.68	11.65	10.51
20318	chr14	55745171	55746171	13	Dhrs1	30.27	31.56	-0.4	-0.43	30.27	23	18.65	18.06	31.56	23.95	36.49	30.38	26.16	19.71	23.14	14.23	21.99	19.74	11.04	15.88	27.27	25.4	39.85	29.43
6825	chr10	67537140	67538140	-229	Egr2	88.29	99.89	-0.54	-1.7	88.29	43.18	35.25	32.57	99.89	98.2	76.21	90.46	60.65	37.34	31.56	40.5	28.59	36.66	28.21	29.65	39.86	102.96	99.33	97.39
39969	chr3	27326404	27327404	9827	Tnfsf10	38.26	7.53	2.02	-3.64	38.26	17.1	13.9	6.96	7.53	45.51	25.76	43.5	17.84	14.52	18.93	15.33	16.49	9.87	6.13	8.47	6.29	7.35	6.13	9.11
61635	chr8	75017996	75018996	2274	Hmgxb4	10.33	23.58	-1.52	-2.18	10.33	12.97	12.28	12.33	23.58	9.58	9.66	11.74	19.03	7.26	12.62	9.85	14.29	12.69	8.59	9.53	18.88	24.07	16.55	30.13
63197	chr8	126381913	126382913	-40088	Coa6	9.8	6.69	0.18	-0.07	9.8	6.31	10.03	6.33	6.69	11.98	9.12	8.29	9.51	2.07	7.36	5.47	7.7	16.92	7.36	9.53	2.1	5.35	4.91	9.81
42370	chr3	110349943	110350943	-99444	Prmt6	14.67	3.64	1.64	-1.24	14.67	8.15	7.37	5.85	3.64	13.17	12.88	17.95	11.89	5.19	7.36	7.66	8.8	5.64	4.91	6.35	6.29	4.01	5.52	1.4
28518	chr17	49690850	49691850	76178	Kif6	12.18	22.85	-1.29	-1.64	12.18	4.77	6.48	5.85	22.85	10.78	11.27	14.5	5.95	4.15	4.21	5.47	5.5	8.46	4.91	6.35	6.29	31.42	14.72	22.42
29451	chr17	83252774	83253774	37991	Pkdcc	9.3	13.81	-0.96	-0.78	9.3	8.75	6.48	11.35	13.81	9.58	5.9	12.43	9.51	7.26	9.47	6.57	4.4	8.46	9.81	11.65	12.59	12.7	9.81	18.92
44099	chr4	12875636	12876636	-30701	Triqk	13.79	19.86	-0.89	-0.85	13.79	2.93	2.04	2.22	19.86	8.38	15.03	17.95	3.57	3.11	2.1	1.09	2.2	2.82	2.45	2.12	2.1	12.03	30.04	17.52
22215	chr15	11691353	11692353	213821	Npr3	7.77	13.77	-1.12	-0.96	7.77	2.53	3.24	4.33	13.77	9.58	7.51	6.21	2.38	3.11	2.1	1.09	4.4	4.23	2.45	6.35	4.2	15.38	14.72	11.21
20533	chr14	62570003	62571003	14766	Fam124a	19.37	30.96	-1.03	-1.47	19.37	11.75	15.63	14.15	30.96	10.78	15.56	31.76	5.95	10.37	18.93	8.76	19.79	18.33	9.81	13.76	18.88	26.74	32.5	33.63
63703	chr9	21804025	21805025	5475	Mir7083	19.57	17.97	-0.23	-0.14	19.57	23.92	21.73	35.9	17.97	29.94	12.88	15.88	32.11	22.82	16.83	19.7	18.69	26.79	31.89	31.76	44.06	15.38	24.53	14.01
37955	chr2	135908581	135909581	-143258	Lamp5	7.39	15.06	-1.4	-1.35	7.39	3.96	3.34	2.52	15.06	8.38	9.66	4.14	3.57	7.26	1.05	2.19	2.2	5.64	1.23	2.12	4.2	12.7	17.78	14.71
48289	chr5	9199287	9200287	-38011	Dmtf1	7.89	19.26	-1.62	-2	7.89	5.12	1.93	4.45	19.26	4.79	11.27	7.6	5.95	4.15	5.26	1.09	3.3	1.41	4.91	4.24	4.2	16.71	21.46	19.62
34645	chr2	18693837	18694837	-4685	Spag6	50.8	55.27	-0.47	-0.85	50.8	35.96	33.23	28.61	55.27	49.1	51.52	51.79	45.19	30.08	32.61	28.46	37.39	33.84	25.76	30.7	29.37	47.47	54.57	63.76
45516	chr4	71190798	71191798	-656370	Megf9	9.58	35.75	-2.24	-1.45	9.58	3.28	4.07	3.75	35.75	1.2	17.17	10.36	3.57	3.11	3.16	4.38	2.2	5.64	4.91	4.24	2.1	32.09	33.11	42.04
48299	chr5	9725580	9726580	-728	Grm3	75.45	88.66	-0.58	-1.7	75.45	22.96	22.78	25.98	88.66	70.66	73.52	82.17	34.49	21.78	12.62	15.33	21.99	31.02	36.79	26.47	14.69	78.89	103.01	84.08
21652	chr14	113878294	113879294	-953171	4930524C18Rik	9.62	17.37	-1.25	-1.09	9.62	6.95	4.23	5.74	17.37	2.4	11.27	15.19	8.32	7.26	5.26	3.28	6.6	2.82	2.45	8.47	6.29	12.7	13.49	25.92
31610	chr18	69428302	69429302	82642	Tcf4	16.71	25.55	-0.95	-1.2	16.71	6.76	6.21	4.21	25.55	16.77	16.1	17.26	11.89	2.07	6.31	6.57	2.2	9.87	0	6.35	6.29	14.71	32.5	29.43
30111	chr18	15351407	15352407	51092	Aqp4	15.56	8.73	0.48	-0.29	15.56	11.87	7.42	6.56	8.73	16.77	11.27	18.64	9.51	14.52	11.57	10.95	9.9	1.41	4.91	8.47	6.29	11.37	9.2	5.61
53525	chr6	57812018	57813018	12607	Vopp1	26.08	9.88	1.05	-1.03	26.08	13.15	14.42	18.33	9.88	21.56	21.47	35.22	15.46	13.48	10.52	14.23	12.1	16.92	17.17	6.35	31.47	17.38	7.36	4.9
67560	chrX	99383411	99384411	59886	Gm14812	14.5	3.02	1.91	-1.47	14.5	8.44	5.8	5.73	3.02	14.37	13.95	15.19	10.7	7.26	7.36	4.38	8.8	4.23	2.45	4.24	10.49	1.34	4.91	2.8
63729	chr9	22410998	22411998	-13	9530077C05Rik	59.13	54.2	-0.23	-0.31	59.13	38.24	34.27	39.66	54.2	65.87	54.2	57.31	59.46	35.26	19.99	25.18	29.69	47.93	29.44	39.18	50.35	50.14	61.31	51.15
37768	chr2	130731043	130732043	-34024	Slc4a11	23.64	6.03	1.52	-1.57	23.64	5.46	12.22	3.58	6.03	35.93	12.88	22.1	5.95	6.22	4.21	10.95	8.8	16.92	1.23	7.41	2.1	6.69	3.68	7.71
53856	chr6	73279313	73280313	31308	Suclg1	28.82	5.28	2.16	-2.8	28.82	14.33	20.42	9.65	5.28	31.14	21.47	33.84	19.03	15.56	8.41	22.99	14.29	23.97	11.04	7.41	10.49	4.01	10.42	1.4
1456	chr1	62900996	62901996	-106764	4930487H11Rik	4.52	12.9	-1.81	-1.48	4.52	7.3	6.69	6.9	12.9	0	8.05	5.52	8.32	7.26	6.31	4.38	4.4	11.28	4.91	5.29	10.49	11.37	14.72	12.61
21400	chr14	101102165	101103165	97404	Prr30	11.04	4.39	0.98	-0.55	11.04	5.87	5.27	6.77	4.39	7.19	10.73	15.19	7.14	4.15	6.31	5.47	3.3	7.05	9.81	2.12	8.39	4.68	4.29	4.2
42086	chr3	101805830	101806830	29893	Mab21l3	27.61	22.63	-0.08	-0.05	27.61	19.02	17.71	11.99	22.63	37.13	18.78	26.93	22.6	17.63	16.83	18.61	17.59	16.92	15.94	9.53	10.49	27.41	20.85	19.62
61526	chr8	70873126	70874126	-136	Ccdc124	41.93	47.29	-0.53	-0.91	41.93	42.61	25.96	31.09	47.29	46.71	39.71	39.36	64.22	39.41	24.19	24.08	24.19	29.61	19.62	23.29	50.35	46.13	50.89	44.84
47428	chr4	136310318	136311318	-124	Hnrnpr	71.45	92.83	-0.73	-2.15	71.45	41.16	42.98	39.55	92.83	85.03	69.23	60.08	53.52	37.34	32.61	49.26	37.39	42.29	35.57	24.35	58.74	75.55	119.56	83.38
14902	chr12	91399910	91400910	-583	Tshr	51.25	35.95	0.15	-0.16	51.25	26.1	26.48	24.8	35.95	47.9	45.08	60.77	42.81	18.67	16.83	30.65	21.99	26.79	19.62	25.41	29.37	30.08	44.15	33.63
53828	chr6	72696458	72697458	67127	Gm15401	37.54	12.3	1.25	-1.94	37.54	10.85	15.04	9.94	12.3	45.51	28.44	38.67	9.51	8.3	14.73	14.23	15.39	15.51	9.81	9.53	10.49	8.69	13.49	14.71
63020	chr8	121828915	121829915	154	Klhdc4	21.54	29.01	-0.78	-1.04	21.54	14.96	14.68	16.1	29.01	20.36	26.3	17.95	16.65	12.45	15.78	16.42	12.1	15.51	20.85	19.06	8.39	26.07	34.34	26.63
42379	chr3	112138372	112139372	256969	Gm6602	19.97	14.93	0.07	-0.04	19.97	6.74	6.27	4.67	14.93	21.56	15.56	22.79	11.89	6.22	2.1	6.57	6.6	5.64	2.45	3.18	8.39	16.05	9.81	18.92
35240	chr2	36021456	36022456	27336	Ndufa8	26.13	16.31	0.3	-0.23	26.13	11.07	10.03	15.66	16.31	31.14	18.25	29	15.46	9.33	8.41	14.23	8.8	7.05	19.62	10.59	16.78	17.38	14.72	16.82
20551	chr14	63177706	63178706	-319	Fdft1	96.13	85.77	-0.2	-0.35	96.13	57.16	53.65	51.4	85.77	108.98	75.13	104.27	78.49	43.56	49.44	48.16	54.98	57.8	40.47	46.59	67.13	78.89	99.94	78.47
41125	chr3	68869893	68870893	807	1110032F04Rik	48.54	33.93	0.14	-0.13	48.54	17.09	13.11	17.31	33.93	53.89	36.49	55.24	26.16	9.33	15.78	12.04	13.19	14.1	17.17	15.88	18.88	36.1	35.56	30.13
50343	chr5	97278003	97279003	113827	Naa11	28.74	12.47	0.82	-0.93	28.74	5.89	9.24	5.56	12.47	25.15	27.91	33.15	8.32	7.26	2.1	9.85	6.6	11.28	6.13	6.35	4.2	10.7	14.1	12.61
55754	chr6	141433864	141434864	-89990	Slco1c1	30.86	25.58	-0.1	-0.06	30.86	7.74	8.2	7.78	25.58	25.15	27.37	40.05	10.7	6.22	6.31	7.66	9.9	7.05	8.59	8.47	6.29	14.04	36.79	25.92
50396	chr5	99252276	99253276	151	Rasgef1b	78.1	78.67	-0.37	-0.81	78.1	43.76	46.33	45.64	78.67	75.45	74.6	84.24	66.6	37.34	27.35	47.07	43.98	47.93	38.02	31.76	67.13	76.88	82.77	76.37
42411	chr3	115588311	115589311	126244	S1pr1	9.84	30.05	-1.93	-3.69	9.84	3.23	4.8	5.09	30.05	9.58	12.34	7.6	2.38	3.11	4.21	6.57	2.2	5.64	3.68	5.29	6.29	32.09	34.95	23.12
2195	chr1	88456356	88457356	49846	Spp2	9.34	4.83	0.53	-0.23	9.34	9.5	6.95	12.97	4.83	8.38	8.59	11.05	10.7	6.22	11.57	4.38	6.6	9.87	7.36	8.47	23.08	8.02	3.68	2.8
27703	chr17	24803915	24804915	33	Meiob	23.66	23.54	-0.34	-0.28	23.66	14.1	10.4	11.18	23.54	29.94	18.25	22.79	21.41	9.33	11.57	13.14	11	7.05	13.49	11.65	8.39	23.4	32.5	14.71
19204	chr14	11774934	11775934	221881	Ptprg	36.73	10.14	1.5	-2.28	36.73	31.71	17.13	14.61	10.14	35.93	25.22	49.03	44	29.04	22.09	12.04	15.39	23.97	19.62	9.53	14.69	12.03	13.49	4.9
5202	chr10	7589453	7590453	153	Lrp11	96.97	84	-0.15	-0.24	96.97	54.72	45.96	46.93	84	99.4	90.7	100.82	78.49	41.49	44.18	56.92	42.88	38.07	49.06	51.88	39.86	72.87	85.23	93.89
64036	chr9	33295626	33296626	-367160	Gm27162	13.53	4.91	1.08	-0.72	13.53	4.03	6.17	5.85	4.91	14.37	9.66	16.57	4.76	2.07	5.26	6.57	7.7	4.23	4.91	4.24	8.39	3.34	3.68	7.71
27212	chr17	5491048	5492048	-1052	Zdhhc14	67.15	40.71	0.34	-0.51	67.15	34.8	36.88	34.09	40.71	73.05	53.13	75.27	42.81	33.19	28.4	32.84	34.09	43.7	38.02	28.59	35.67	46.8	41.69	33.63
24501	chr15	103135188	103136188	11140	D930007P13Rik	37.49	18.95	0.63	-0.74	37.49	34.78	28.89	19.88	18.95	38.32	42.4	31.76	49.95	22.82	31.56	27.37	29.69	29.61	19.62	16.94	23.08	23.4	20.85	12.61
49369	chr5	52893479	52894479	59844	Anapc4	22.38	6.89	1.42	-1.52	22.38	18.99	22.62	17.66	6.89	22.75	25.76	18.64	30.92	17.63	8.41	17.51	26.39	23.97	17.17	14.82	20.98	7.35	4.91	8.41
48394	chr5	14902998	14903998	11391	Gm9758	15.96	11.28	0.11	-0.05	15.96	8.03	5.23	4.76	11.28	11.98	14.49	21.41	9.51	10.37	4.21	5.47	8.8	1.41	3.68	10.59	0	12.03	14.1	7.71
22612	chr15	33862081	33863081	-174698	Tspyl5	6.43	18.29	-1.81	-2.06	6.43	6.22	4.7	4.39	18.29	4.79	4.83	9.67	7.14	3.11	8.41	4.38	5.5	4.23	3.68	5.29	4.2	12.03	28.82	14.01
48481	chr5	17689098	17690098	114782	Sema3c	26.97	52.12	-1.32	-3.69	26.97	18.62	12.27	8.3	52.12	31.14	26.3	23.48	29.73	12.45	13.67	15.33	8.8	12.69	4.91	5.29	14.69	50.81	60.7	44.84
50791	chr5	111876884	111877884	-115656	E130006D01Rik	13.46	8.33	0.37	-0.2	13.46	13.01	10.03	14.71	8.33	16.77	13.95	9.67	11.89	13.48	13.67	8.76	4.4	16.92	7.36	7.41	29.37	6.69	9.2	9.11
20386	chr14	57977835	57978835	20927	Micu2	19.22	5.89	1.41	-1.26	19.22	4.86	2.77	3.98	5.89	28.74	12.34	16.57	8.32	3.11	3.16	4.38	1.1	2.82	2.45	5.29	4.2	4.01	7.36	6.31
46209	chr4	98559868	98560868	13734	Patj	10.92	13.5	-0.68	-0.51	10.92	6.26	1.57	2.52	13.5	11.98	6.98	13.81	8.32	5.19	5.26	2.19	1.1	1.41	1.23	2.12	4.2	14.04	15.94	10.51
52443	chr6	17496432	17497432	32975	Met	16.15	7.93	0.67	-0.46	16.15	7.7	10.61	4.16	7.93	13.17	16.64	18.64	9.51	5.19	8.41	4.38	17.59	9.87	6.13	4.24	2.1	10.03	6.74	7.01
40357	chr3	39343799	39344799	457359	Fat4	22.61	60.49	-1.79	-6.2	22.61	9.24	10.61	5.96	60.49	20.36	19.86	27.62	13.08	6.22	8.41	9.85	12.1	9.87	7.36	4.24	6.29	56.83	49.66	74.97
51860	chr5	146451416	146452416	-30027	Gm6408	21.12	6.36	1.36	-1.31	21.12	6.7	8.15	5.55	6.36	21.56	20.39	21.41	10.7	4.15	5.26	7.66	5.5	11.28	6.13	4.24	6.29	11.37	4.91	2.8
36950	chr2	104266734	104267734	143100	D430041D05Rik	36	8.81	1.69	-2.85	36	24.86	19.23	9.07	8.81	39.52	28.44	40.05	38.06	21.78	14.73	15.33	19.79	22.56	6.13	10.59	10.49	9.36	7.97	9.11
48506	chr5	18445655	18446655	-85742	Gnai1	13.81	13.13	-0.38	-0.19	13.81	10.82	8.46	4.39	13.13	5.99	6.44	29	17.84	7.26	7.36	9.85	9.9	5.64	3.68	5.29	4.2	16.71	7.97	14.71
41093	chr3	68308839	68309839	-158844	Schip1	15.78	1.74	2.92	-2.38	15.78	5.32	6.01	8.09	1.74	17.96	15.56	13.81	2.38	6.22	7.36	1.09	9.9	7.05	7.36	14.82	2.1	0.67	2.45	2.1
52402	chr6	16606871	16607871	291070	Tfec	45.19	12.76	1.45	-2.8	45.19	20.31	24.76	10.07	12.76	51.5	44.01	40.05	28.54	14.52	17.88	20.8	25.29	28.2	12.26	11.65	6.29	10.7	17.78	9.81
28225	chr17	42978049	42979049	-38006	Tnfrsf21	11.4	7.12	0.36	-0.17	11.4	10.21	11.13	6.03	7.12	9.58	8.05	16.57	11.89	13.48	5.26	15.33	11	7.05	8.59	5.29	4.2	7.35	4.91	9.11
24691	chr16	9477842	9478842	514191	Grin2a	6.11	16.09	-1.8	-0.77	6.11	2.92	3.34	5.1	16.09	0	5.9	12.43	3.57	4.15	1.05	2.19	2.2	5.64	3.68	9.53	2.1	21.39	12.88	14.01
22929	chr15	44706007	44707007	-19	Sybu	17.66	7.08	0.91	-0.71	17.66	7.29	5.43	5.39	7.08	22.75	15.03	15.19	16.65	2.07	3.16	7.66	4.4	4.23	9.81	6.35	0	4.68	6.74	9.81
48605	chr5	22851291	22852291	-104907	A930003O13Rik	16.25	14.34	-0.21	-0.12	16.25	6.91	4.33	5.52	14.34	10.78	14.49	23.48	7.14	5.19	8.41	5.47	3.3	4.23	4.91	11.65	0	16.05	17.17	9.81
67163	chrX	51912940	51913940	59332	1700080O16Rik	13.66	9.01	0.24	-0.12	13.66	7.69	6.48	7.37	9.01	14.37	10.73	15.88	9.51	7.26	6.31	6.57	4.4	8.46	7.36	8.47	6.29	6.02	9.81	11.21
29839	chr18	5989584	5990584	146014	Arhgap12	127.56	97.3	0.03	-0.04	127.56	84.78	71.41	72.4	97.3	141.32	104.65	136.72	115.36	65.34	73.63	61.3	72.57	80.36	76.04	63.53	77.62	88.25	104.85	98.79
6423	chr10	53915005	53916005	160291	Man1a	48.55	46.18	-0.28	-0.36	48.55	24.04	12.02	10.01	46.18	64.67	35.42	45.57	34.49	17.63	19.99	9.85	12.1	14.1	11.04	12.71	6.29	44.12	45.37	49.05
64320	chr9	43105403	43106403	-185	Arhgef12	40.91	53.54	-0.73	-1.53	40.91	20.5	19.5	21.75	53.54	43.11	45.08	34.53	33.3	13.48	14.73	10.95	26.39	21.15	14.72	19.06	31.47	49.47	55.8	55.35
62469	chr8	105636166	105637166	128	Ctcf	86.5	104.45	-0.63	-2.01	86.5	32.96	21.05	35.23	104.45	104.19	82.11	73.2	48.76	24.89	25.24	28.46	21.99	12.69	25.76	23.29	56.65	92.26	110.37	110.71
61240	chr8	60992637	60993637	-56	Nek1	151.02	149.07	-0.34	-1.09	151.02	96.48	106.76	93.98	149.07	177.24	126.66	149.15	129.63	78.82	80.99	108.37	103.36	108.56	101.8	83.64	96.51	149.75	164.32	133.13
26226	chr16	63287270	63288270	433463	Pros1	15.6	35.72	-1.53	-2.71	15.6	3.63	1.82	6.37	35.72	8.38	17.71	20.72	3.57	2.07	5.26	5.47	0	0	8.59	4.24	6.29	20.72	47.21	39.24
37321	chr2	117249219	117250219	-20	Fam98b	88.56	70.21	-0.03	-0.04	88.56	30	35.47	30.92	70.21	105.39	71.91	88.39	35.68	26.97	27.35	30.65	36.29	39.47	30.66	22.23	39.86	74.88	69.9	65.86
26425	chr16	73433810	73434810	771161	Robo1	7.74	18.61	-1.61	-1.96	7.74	5.9	4.12	6.68	18.61	7.19	9.12	6.91	8.32	6.22	3.16	8.76	2.2	1.41	7.36	8.47	4.2	17.38	20.23	18.22
37536	chr2	124071061	124072061	-18408	Sema6d	47.66	12.75	1.51	-3.13	47.66	29.81	22.15	13.05	12.75	46.71	42.4	53.86	30.92	28	30.5	20.8	23.09	22.56	15.94	12.71	10.49	16.71	11.04	10.51
23352	chr15	64356534	64357534	25885	Asap1	26.84	6.98	1.57	-1.91	26.84	12.62	14.16	18.42	6.98	22.75	17.71	40.05	19.03	8.3	10.52	12.04	12.1	18.33	25.76	12.71	16.78	7.35	7.97	5.61
49737	chr5	71311330	71312330	-215981	Gabra2	17.64	5.61	1.25	-1.01	17.64	3.18	4.7	4.1	5.61	19.16	12.34	21.41	1.19	5.19	3.16	4.38	5.5	4.23	4.91	3.18	4.2	2.01	9.2	5.61
12350	chr11	114203075	114204075	5317	1700092K14Rik	17.32	8.74	0.65	-0.46	17.32	7.96	6.58	5.1	8.74	16.77	19.32	15.88	7.14	6.22	10.52	3.28	6.6	9.87	3.68	7.41	4.2	10.7	9.2	6.31
31499	chr18	66146987	66147987	71846	Mir694	17.85	11.74	0.21	-0.1	17.85	5.76	4.96	9.11	11.74	8.38	13.42	31.76	4.76	6.22	6.31	5.47	6.6	2.82	7.36	5.29	14.69	12.7	9.2	13.31
28154	chr17	36205233	36206233	-15582	H2-T3	20.95	15.08	0.13	-0.07	20.95	12.37	8.72	7.85	15.08	23.95	16.1	22.79	13.08	10.37	13.67	13.14	8.8	4.23	9.81	9.53	4.2	8.02	19.01	18.22
61531	chr8	71370946	71371946	148	Ocel1	104.75	108.9	-0.42	-1.21	104.75	63.26	54.32	56.61	108.9	105.39	92.85	116.01	91.57	45.63	52.59	56.92	53.88	52.16	53.96	52.94	62.94	90.92	120.18	115.61
10429	chr11	57732293	57733293	68674	2010001A14Rik	33.56	13.21	1.01	-1.35	33.56	13.11	10.81	7.48	13.21	38.32	25.76	36.6	22.6	6.22	10.52	12.04	7.7	12.69	9.81	4.24	8.39	10.03	13.49	16.12
32402	chr19	6995650	6996650	19	Trpt1	30.96	24.32	-0.02	-0.01	30.96	25.07	18.65	20.94	24.32	43.11	26.3	23.48	34.49	20.74	19.99	17.51	18.69	19.74	19.62	22.23	20.98	27.41	24.53	21.02
56857	chr7	43495030	43496030	-5507	Iglon5	16.71	11.84	0.11	-0.06	16.71	11.87	9.41	13.16	11.84	22.75	12.88	14.5	17.84	7.26	10.52	8.76	11	8.46	11.04	11.65	16.78	13.37	11.65	10.51
39057	chr2	167894713	167895713	-37114	Ptpn1	12.67	21.17	-1.07	-1.13	12.67	7.99	6.63	11.41	21.17	16.77	15.03	6.21	8.32	8.3	7.36	12.04	2.2	5.64	18.4	9.53	6.29	14.71	21.46	27.33
15127	chr12	99873723	99874723	9219	Efcab11	18.01	5.25	1.42	-1.24	18.01	11.06	6.38	6.96	5.25	10.78	17.71	25.55	15.46	10.37	7.36	4.38	7.7	7.05	13.49	3.18	4.2	4.01	6.13	5.61
36119	chr2	71055360	71056360	116	Dcaf17	91.06	91.83	-0.38	-0.92	91.06	52.8	52.4	50.98	91.83	81.44	87.48	104.27	82.06	31.11	45.23	44.88	61.58	50.75	39.25	44.47	69.23	88.92	101.78	84.78
56780	chr7	38141457	38142457	-34467	Ccne1	12.74	14.61	-0.52	-0.34	12.74	11.27	11.23	11.82	14.61	8.38	18.78	11.05	11.89	11.41	10.52	14.23	11	8.46	12.26	12.71	10.49	17.38	11.04	15.41
8860	chr10	128376679	128377679	55	Ankrd52	53.32	59.01	-0.49	-0.86	53.32	14.3	15.72	16.72	59.01	45.51	48.84	65.6	17.84	13.48	11.57	12.04	15.39	19.74	12.26	14.82	23.08	58.16	75.42	43.44
57859	chr7	81898809	81899809	35150	Hdgfl3	18.47	4.33	1.73	-1.52	18.47	11.78	6.43	8.77	4.33	23.95	10.73	20.72	15.46	8.3	11.57	3.28	13.19	2.82	7.36	6.35	12.59	6.69	4.91	1.4
11186	chr11	80982603	80983603	124714	Spaca3	20.53	8.98	0.88	-0.67	20.53	9.57	7.78	6.31	8.98	25.15	19.86	16.57	13.08	9.33	6.31	5.47	6.6	11.28	7.36	5.29	6.29	15.38	2.45	9.11
26467	chr16	74814092	74815092	278178	Robo2	29.76	9.73	1.25	-1.54	29.76	10.95	14.99	25.74	9.73	31.14	18.78	39.36	13.08	15.56	4.21	19.7	15.39	9.87	31.89	24.35	20.98	6.69	14.1	8.41
4650	chr1	183296661	183297661	101	Aida	71.95	76.11	-0.44	-1.01	71.95	40.92	39.43	25.2	76.11	76.65	61.18	78.03	64.22	26.97	31.56	39.41	35.19	43.7	35.57	19.06	20.98	72.87	84	71.47
23231	chr15	59614971	59615971	-33183	Trib1	15.59	7.45	0.64	-0.41	15.59	10.22	11.81	11.11	7.45	19.16	14.49	13.12	11.89	10.37	8.41	12.04	12.1	11.28	12.26	10.59	10.49	10.7	6.74	4.9
33863	chr19	52721179	52722179	-201502	AA387883	35.74	13.21	1.08	-1.45	35.74	8.03	9.3	5.87	13.21	31.14	23.61	52.48	9.51	9.33	5.26	9.85	11	7.05	4.91	10.59	2.1	10.03	13.49	16.12
18201	chr13	95324698	95325698	373	Zbed3	47.69	51.02	-0.46	-0.77	47.69	16.94	19.43	21.8	51.02	55.09	37.57	50.41	14.27	17.63	18.93	16.42	16.49	25.38	15.94	15.88	33.57	48.14	45.37	59.56
7153	chr10	77240409	77241409	18314	Gm10941	16.55	16.03	-0.32	-0.2	16.55	8.24	12.95	8.02	16.03	11.98	10.73	26.93	5.95	11.41	7.36	15.33	6.6	16.92	6.13	9.53	8.39	12.7	17.17	18.22
54416	chr6	95098066	95099066	19065	Kbtbd8os	13.59	13.01	-0.3	-0.17	13.59	9.09	7.46	9.35	13.01	10.78	8.59	21.41	9.51	8.3	9.47	12.04	3.3	7.05	12.26	5.29	10.49	10.03	12.88	16.12
51941	chr5	148450647	148451647	-51243	Slc7a1	14.01	11.73	-0.09	-0.04	14.01	6.52	6.84	5.91	11.73	11.98	15.56	14.5	5.95	4.15	9.47	7.66	4.4	8.46	6.13	7.41	4.2	13.37	9.2	12.61
26804	chr16	89590126	89591126	-19443	Krtap11-1	17.49	4.87	1.53	-1.36	17.49	8.34	8.57	4.39	4.87	17.96	14.49	20.03	8.32	9.33	7.36	10.95	7.7	7.05	3.68	5.29	4.2	4.01	4.29	6.31
39560	chr3	5785762	5786762	-210014	Pex2	17.32	9.31	0.5	-0.32	17.32	7.59	6.48	1.06	9.31	14.37	18.25	19.33	7.14	10.37	5.26	4.38	6.6	8.46	0	3.18	0	12.7	6.13	9.11
7304	chr10	80621896	80622896	-384	Csnk1g2	125.96	148.51	-0.59	-2.52	125.96	60.61	55.53	75.46	148.51	143.71	120.22	113.94	85.63	40.45	55.75	55.83	57.18	53.57	67.46	58.23	100.7	144.41	143.48	157.65
56223	chr7	16299331	16300331	-9752	Bbc3	44.73	29.23	0.24	-0.24	44.73	46.51	43.67	40.98	29.23	47.9	33.81	52.48	64.22	30.08	45.23	40.5	43.98	46.52	50.29	28.59	44.06	34.1	31.88	21.72
3414	chr1	144018306	144019306	-14657	Rgs2	14.47	29.59	-1.4	-2.32	14.47	7.99	10.55	12.8	29.59	17.96	12.34	13.12	8.32	9.33	6.31	15.33	12.1	4.23	25.76	4.24	8.39	37.44	23.3	28.03
11553	chr11	93519354	93520354	365912	Utp18	12.83	6.55	0.68	-0.37	12.83	6.96	7	6.43	6.55	15.57	9.12	13.81	8.32	4.15	8.41	7.66	7.7	5.64	9.81	5.29	4.2	1.34	9.2	9.11
7742	chr10	94377588	94378588	66139	Tmcc3	45.51	23.26	0.61	-0.8	45.51	15.79	11.75	10.34	23.26	34.73	37.57	64.22	20.22	14.52	12.62	12.04	7.7	15.51	18.4	4.24	8.39	18.72	30.04	21.02
35746	chr2	59290408	59291408	95774	5330411J11Rik	29.01	8.68	1.38	-1.65	29.01	10.28	16.14	7.01	8.68	32.33	18.78	35.91	13.08	8.3	9.47	15.33	17.59	15.51	7.36	5.29	8.39	3.34	12.88	9.81
18813	chr13	112439140	112440140	-24430	Il6st	28.47	20.91	0.1	-0.07	28.47	8.64	9.4	5.67	20.91	29.94	20.93	34.53	7.14	11.41	7.36	9.85	9.9	8.46	8.59	2.12	6.29	23.4	23.91	15.41
7638	chr10	91033666	91034666	48577	Apaf1	7.99	13.91	-1.12	-0.86	7.99	10.42	9.14	8.07	13.91	4.79	15.03	4.14	16.65	8.3	6.31	8.76	8.8	9.87	7.36	6.35	10.49	14.04	17.17	10.51
21030	chr14	79006921	79007921	158243	Vwa8	6.54	13.11	-1.36	-1.23	6.54	6.17	6.27	6.31	13.11	7.19	4.83	7.6	5.95	5.19	7.36	4.38	8.8	5.64	7.36	3.18	8.39	12.7	14.72	11.91
14964	chr12	93460514	93461514	-16191	4930559C10Rik	20.16	5.26	1.54	-1.56	20.16	6.2	5.33	3.75	5.26	20.36	16.64	23.48	7.14	8.3	3.16	4.38	8.8	2.82	4.91	4.24	2.1	5.35	5.52	4.9
44467	chr4	31641877	31642877	-321730	Map3k7	21.23	26.75	-0.69	-0.84	21.23	13.27	10.35	10.64	26.75	23.95	15.56	24.17	17.84	8.3	13.67	7.66	12.1	11.28	9.81	7.41	14.69	28.75	22.07	29.43
31530	chr18	67288777	67289777	54	Impa2	67.46	62.3	-0.25	-0.36	67.46	23.08	30.97	29.74	62.3	73.05	54.74	74.58	28.54	22.82	17.88	36.12	28.59	28.2	28.21	16.94	44.06	67.52	76.64	42.74
1686	chr1	71827572	71828572	-60040	Gm8883	3.25	17.77	-2.92	-3.61	3.25	4.68	5.28	3.98	17.77	2.4	3.22	4.14	3.57	2.07	8.41	2.19	6.6	7.05	2.45	5.29	4.2	15.38	19.01	18.92
15841	chr13	6275365	6276365	-272292	Pitrm1	24.59	16.02	0.22	-0.15	24.59	8.75	8.2	4.5	16.02	19.16	26.3	28.31	9.51	7.26	9.47	8.76	8.8	7.05	6.13	3.18	4.2	20.72	14.72	12.61
63536	chr9	14859804	14860804	94	Gpr83	41.6	30.78	0.09	-0.07	41.6	26.12	25.12	24.41	30.78	27.54	46.15	51.1	34.49	20.74	23.14	24.08	23.09	28.2	25.76	30.7	16.78	26.74	31.27	34.33
58699	chr7	113377585	113378585	-8746	Btbd10	21.5	18.45	-0.13	-0.08	21.5	13.07	15.15	13.39	18.45	21.56	23.61	19.33	13.08	12.45	13.67	13.14	15.39	16.92	8.59	10.59	20.98	14.71	19.62	21.02
52914	chr6	36960321	36961321	-150642	Ptn	20.56	7.6	1.07	-0.98	20.56	7.1	13.95	9.78	7.6	23.95	17.71	20.03	11.89	4.15	5.26	14.23	12.1	15.51	13.49	11.65	4.2	10.03	8.58	4.2
48446	chr5	16469812	16470812	-83183	Hgf	68.24	50.61	0.06	-0.06	68.24	40.2	33.95	19.93	50.61	52.69	57.42	94.6	64.22	29.04	27.35	29.56	28.59	43.7	28.21	12.71	18.88	42.79	45.99	63.06
31585	chr18	68852493	68853493	98535	4930546C10Rik	11.92	6.03	0.55	-0.29	11.92	3.27	4.24	1.46	6.03	11.98	8.59	15.19	3.57	5.19	1.05	2.19	7.7	2.82	1.23	1.06	2.1	6.69	3.68	7.71
56011	chr6	148632216	148633216	-18407	Gm6313	2.6	17.37	-3.06	-3.63	2.6	3.28	2.3	3.28	17.37	3.59	2.15	2.07	3.57	3.11	3.16	1.09	4.4	1.41	2.45	5.29	2.1	18.05	21.46	12.61
26339	chr16	70114878	70115878	-198571	Gbe1	14.67	3.71	1.63	-1.26	14.67	7.66	10.5	6.43	3.71	19.16	9.66	15.19	8.32	4.15	10.52	8.76	14.29	8.46	9.81	5.29	4.2	3.34	4.29	3.5
26232	chr16	63498080	63499080	365577	Epha3	9.06	28.8	-2.01	-3.47	9.06	2.58	2.04	1.46	28.8	4.79	13.42	8.98	3.57	3.11	1.05	2.19	1.1	2.82	1.23	1.06	2.1	24.74	39.24	22.42
11980	chr11	103217614	103218614	318	Spata32	22.45	26.72	-0.61	-0.67	22.45	7.9	6.43	9.3	26.72	31.14	13.42	22.79	5.95	9.33	8.41	6.57	9.9	2.82	3.68	9.53	14.69	23.4	29.43	27.33
1065	chr1	50963307	50964307	36284	Tmeff2	25.33	6.43	1.63	-1.8	25.33	19.41	17.07	6.43	6.43	28.74	18.25	29	23.79	18.67	15.78	19.7	13.19	18.33	9.81	5.29	4.2	8.69	9.2	1.4
68035	chrX	143884674	143885674	47950	Dcx	27.62	21.89	-0.03	-0.02	27.62	11.43	13.32	10.48	21.89	27.54	21.47	33.84	15.46	6.22	12.62	10.95	12.1	16.92	13.49	11.65	6.29	18.72	24.53	22.42
57296	chr7	63802441	63803441	-113916	E030018B13Rik	27.3	22.77	-0.11	-0.07	27.3	18.9	15.24	26.41	22.77	26.35	18.25	37.29	28.54	17.63	10.52	19.7	7.7	18.33	31.89	15.88	31.47	25.4	13.49	29.43
58290	chr7	98743011	98744011	40264	Thap12	10.01	12.7	-0.63	-0.4	10.01	10.22	10.24	13.17	12.7	4.79	15.56	9.67	11.89	10.37	8.41	8.76	12.1	9.87	11.04	15.88	12.59	12.7	13.49	11.91
22675	chr15	36151653	36152653	-11753	Rgs22	13.81	12.23	-0.21	-0.11	13.81	9.03	7.78	7.43	12.23	14.37	13.95	13.12	8.32	10.37	8.41	6.57	5.5	11.28	8.59	7.41	6.29	14.71	12.88	9.11
6002	chr10	35770511	35771511	-735796	Hs3st5	8.05	3.58	0.84	-0.35	8.05	3.96	5.17	4.33	3.58	9.58	6.98	7.6	3.57	7.26	1.05	4.38	5.5	5.64	2.45	6.35	4.2	4.01	6.74	0
2749	chr1	120073326	120074326	-46	Tmem37	63.94	41.17	0.27	-0.35	63.94	29.87	26.95	23.06	41.17	81.44	46.15	64.22	41.62	28	19.99	30.65	21.99	28.2	19.62	26.47	23.08	41.45	48.44	33.63
44304	chr4	21879257	21880257	-96	Coq3	75.32	64.46	-0.14	-0.19	75.32	41.73	38.81	38.2	64.46	71.86	62.25	91.84	49.95	35.26	39.97	43.79	37.39	35.25	42.93	36	35.67	65.52	71.12	56.75
44898	chr4	47713099	47714099	238938	Sec61b	12.36	6.28	0.58	-0.31	12.36	7.04	6.48	5.27	6.28	14.37	7.51	15.19	10.7	7.26	3.16	2.19	8.8	8.46	7.36	6.35	2.1	8.69	7.36	2.8
30624	chr18	36453897	36454897	98	Pfdn1	28.72	30.77	-0.44	-0.47	28.72	11.62	13.38	11.81	30.77	22.75	31.66	31.76	11.89	12.45	10.52	10.95	16.49	12.69	12.26	10.59	12.59	20.06	38.63	33.63
9216	chr11	12558815	12559815	-94355	Cobl	29.17	18.77	0.26	-0.21	29.17	15.59	10.86	7.13	18.77	33.53	23.61	30.38	23.79	11.41	11.57	9.85	4.4	18.33	9.81	5.29	6.29	18.05	16.55	21.72
1021	chr1	45925127	45926127	-33	Slc40a1	105.62	92.96	-0.18	-0.33	105.62	41.3	45.85	43.07	92.96	105.39	98.21	113.25	73.73	21.78	28.4	48.16	32.99	56.39	49.06	44.47	35.67	81.56	99.94	97.39
5094	chr10	3972977	3973977	402	Mthfd1l	127.91	88.54	0.16	-0.29	127.91	87.91	91.47	77.02	88.54	149.7	91.77	142.25	141.52	61.19	61.01	88.67	91.27	94.46	84.63	68.82	77.62	76.88	101.17	87.58
36104	chr2	70508841	70509841	522	Erich2	56.69	42.85	0.06	-0.05	56.69	35.63	24.17	27.56	42.85	51.5	58.5	60.08	45.19	25.93	35.76	30.65	16.49	25.38	33.11	30.7	18.88	35.43	44.76	48.35
52537	chr6	22103909	22104909	118499	Cped1	28.74	11.83	0.92	-0.97	28.74	13.41	12.02	9.89	11.83	25.15	23.08	37.98	21.41	8.3	10.52	9.85	12.1	14.1	8.59	10.59	10.49	16.05	6.13	13.31
5990	chr10	34367832	34368832	-21649	Col10a1	12.6	9.08	0.15	-0.06	12.6	3.33	3.5	3.74	9.08	13.17	12.88	11.74	4.76	2.07	3.16	3.28	4.4	2.82	4.91	2.12	4.2	9.36	12.26	5.61
3537	chr1	151796446	151797446	41572	Edem3	9.64	6.81	0.16	-0.06	9.64	6.15	7.1	3.63	6.81	9.58	9.66	9.67	5.95	9.33	3.16	9.85	4.4	7.05	2.45	4.24	4.2	6.69	6.74	7.01
52723	chr6	30047465	30048465	-23	Nrf1	69.94	70.08	-0.36	-0.65	69.94	22.86	20.01	22.21	70.08	87.42	64.4	58	30.92	14.52	23.14	16.42	25.29	18.33	24.53	14.82	27.27	68.19	64.99	77.07
62080	chr8	90861627	90862627	33292	Chd9	13.56	17.61	-0.72	-0.63	13.56	9.54	6.79	8.77	17.61	14.37	16.64	9.67	11.89	7.26	9.47	7.66	9.9	2.82	7.36	8.47	10.49	20.06	15.94	16.82
4821	chr1	189115697	189116697	-108357	Kctd3	16.68	33.84	-1.35	-1.9	16.68	6.21	9.98	8.54	33.84	4.79	15.56	29.69	7.14	6.22	5.26	8.76	9.9	11.28	17.17	4.24	4.2	22.06	42.31	37.14
14002	chr12	57866739	57867739	-204328	BC042761	11.74	5.45	0.72	-0.39	11.74	5.95	7	4.16	5.45	15.57	8.59	11.05	9.51	5.19	3.16	10.95	4.4	5.64	6.13	4.24	2.1	8.02	5.52	2.8
21073	chr14	79872754	79873754	-4078	Gm10845	61.65	9.54	2.3	-6.28	61.65	10.82	16.82	8.79	9.54	73.05	40.79	71.12	17.84	8.3	6.31	16.42	14.29	19.74	14.72	11.65	0	11.37	6.74	10.51
32425	chr19	7381981	7382981	-522	1700105P06Rik	38.23	53.68	-0.84	-1.44	38.23	23.53	18.39	22	53.68	17.96	50.45	46.27	29.73	11.41	29.45	20.8	23.09	11.28	12.26	26.47	27.27	58.83	59.47	42.74
63046	chr8	122536671	122537671	14158	Piezo1	13.42	25.69	-1.28	-1.8	13.42	10.06	9.25	10.01	25.69	15.57	15.03	9.67	7.14	8.3	14.73	7.66	8.8	11.28	11.04	10.59	8.39	34.76	22.69	19.62
34744	chr2	21909232	21910232	-317771	Myo3a	20.24	20.7	-0.41	-0.34	20.24	9.92	9.46	12.36	20.7	26.35	15.03	19.33	13.08	9.33	7.36	9.85	14.29	4.23	8.59	18	10.49	22.06	23.91	16.12
37152	chr2	112265222	112266222	-592	Slc12a6	114.17	106.72	-0.26	-0.62	114.17	57.65	51.6	53.53	106.72	112.57	98.75	131.2	90.38	36.3	46.28	56.92	52.78	45.11	47.83	56.12	56.65	112.32	104.85	103
25824	chr16	46133853	46134853	-14105	Cd96	16.28	25.28	-1	-1.14	16.28	9.49	11.39	4.39	25.28	9.58	17.17	22.1	10.7	8.3	9.47	12.04	16.49	5.64	3.68	5.29	4.2	31.42	12.88	31.53
63894	chr9	29100255	29101255	311930	Ntm	5.31	9.94	-1.27	-0.87	5.31	3.23	5.8	6.89	9.94	7.19	3.22	5.52	2.38	3.11	4.21	3.28	9.9	4.23	4.91	3.18	12.59	8.02	14.1	7.71
7473	chr10	85640115	85641115	42204	Btbd11	17.59	5.96	1.2	-1.02	17.59	11.91	9.51	12.39	5.96	21.56	13.95	17.26	19.03	8.3	8.41	8.76	9.9	9.87	9.81	8.47	18.88	5.35	5.52	7.01
52158	chr6	5277471	5278471	20402	Pon2	15.07	16.52	-0.52	-0.41	15.07	2.57	5.28	4.8	16.52	11.98	11.81	21.41	3.57	4.15	0	2.19	6.6	7.05	4.91	5.29	4.2	14.71	15.94	18.92
23671	chr15	78173741	78174741	-133	Ift27	96.67	93.13	-0.31	-0.67	96.67	68.64	55.26	42.94	93.13	114.97	83.19	91.84	96.33	61.19	48.39	51.45	49.48	64.85	39.25	43.41	46.16	94.93	101.78	82.68
28170	chr17	36957870	36958870	58	Znrd1	83.2	79.63	-0.3	-0.6	83.2	38.4	33.08	49.74	79.63	92.21	72.45	84.93	63.03	29.04	23.14	25.18	37.39	36.66	42.93	37.06	69.23	79.56	86.45	72.87
60726	chr8	40511236	40512236	18	Cnot7	124.73	137.77	-0.5	-1.99	124.73	83.02	76.89	71.83	137.77	125.75	108.95	139.49	115.36	66.38	67.32	75.53	74.77	80.36	63.78	69.88	81.82	137.05	150.83	125.42
21959	chr15	3408185	3409185	-105159	Ccdc152	4.31	15.27	-2.15	-2.11	4.31	4.04	4.6	2.23	15.27	7.19	1.61	4.14	4.76	1.04	6.31	5.47	5.5	2.82	2.45	4.24	0	7.35	20.23	18.22
21820	chr14	120659877	120660877	181916	Rap2a	13.38	9.36	0.17	-0.08	13.38	6.4	6.64	5.91	9.36	10.78	10.73	18.64	11.89	3.11	4.21	5.47	8.8	5.64	6.13	7.41	4.2	13.37	4.91	9.81
65320	chr9	77469691	77470691	-70775	5730403I07Rik	55	18.64	1.19	-2.59	55	16.53	16.14	25.26	18.64	58.68	43.47	62.84	21.41	15.56	12.62	15.33	17.59	15.51	36.79	20.12	18.88	20.72	18.39	16.82
7427	chr10	84354060	84355060	85911	Nuak1	13.57	7.28	0.54	-0.28	13.57	1.89	4.23	6.67	7.28	7.19	15.56	17.95	3.57	1.04	1.05	4.38	5.5	2.82	7.36	6.35	6.29	12.03	4.91	4.9
61753	chr8	79514869	79515869	-115901	Smad1	14.25	4.84	1.16	-0.84	14.25	3.61	3.6	5.55	4.84	14.37	11.81	16.57	3.57	6.22	1.05	4.38	2.2	4.23	6.13	4.24	6.29	4.01	4.91	5.61
56128	chr7	6382702	6383702	-116	Zfp28	85.1	70.8	-0.1	-0.12	85.1	74.56	76.05	60.7	70.8	100.6	60.11	94.6	104.66	63.27	55.75	75.53	73.67	78.95	51.51	55.06	75.53	76.21	71.74	64.46
39977	chr3	27434907	27435907	64056	Ghsr	25.98	14.57	0.48	-0.41	25.98	13.7	10.55	5.16	14.57	25.15	18.25	34.53	20.22	10.37	10.52	8.76	8.8	14.1	4.91	8.47	2.1	16.05	12.26	15.41
22895	chr15	43195342	43196342	-25024	Rspo2	63.61	22.32	1.15	-2.68	63.61	23.64	28.53	20.6	22.32	58.68	52.06	80.1	41.62	11.41	17.88	30.65	35.19	19.74	26.98	20.12	14.69	19.39	30.04	17.52
3466	chr1	149912727	149913727	9212	Pla2g4a	40.63	59.52	-0.92	-2.5	40.63	20.36	17.03	8	59.52	39.52	35.42	46.96	29.73	14.52	16.83	16.42	12.1	22.56	6.13	5.29	12.59	57.5	60.09	60.96
37812	chr2	131909448	131910448	20	Prnp	45.17	59.52	-0.75	-1.81	45.17	26.57	26.06	24.03	59.52	50.3	42.4	42.81	36.87	19.71	23.14	33.93	23.09	21.15	33.11	18	20.98	51.48	61.93	65.16
36805	chr2	100929513	100930513	-694735	Rag2	8.67	13.69	-0.98	-0.28	8.67	5.85	4.44	3.92	13.69	0	12.88	13.12	7.14	7.26	3.16	5.47	2.2	5.64	1.23	4.24	6.29	12.7	17.17	11.21
20955	chr14	76764089	76765089	4458	4930431P22Rik	21.1	22.11	-0.44	-0.36	21.1	10.69	7.89	8.06	22.11	32.33	12.34	18.64	14.27	5.19	12.62	7.66	13.19	2.82	7.36	4.24	12.59	16.05	20.85	29.43
3632	chr1	154149802	154150802	-50885	Zfp648	21.92	19.81	-0.21	-0.13	21.92	21.03	16.04	11.88	19.81	14.37	23.08	28.31	29.73	20.74	12.62	8.76	15.39	23.97	13.49	13.76	8.39	10.03	22.07	27.33
49964	chr5	77392826	77393826	14719	Igfbp7	15.52	5.56	1.13	-0.79	15.52	5.03	5.17	3.22	5.56	15.57	17.17	13.81	3.57	3.11	8.41	6.57	3.3	5.64	1.23	4.24	4.2	1.34	5.52	9.81
20950	chr14	76687724	76688724	10656	1700108F19Rik	14.59	21.82	-0.93	-0.93	14.59	11	10.66	17.94	21.82	19.16	12.88	11.74	14.27	13.48	5.26	14.23	12.1	5.64	15.94	12.71	25.18	19.39	35.56	10.51
6030	chr10	37193807	37194807	-55381	Marcks	9.26	22.78	-1.69	-2.47	9.26	6.13	5.7	6.9	22.78	8.38	6.98	12.43	4.76	4.15	9.47	5.47	8.8	2.82	4.91	7.41	8.39	17.38	25.75	25.22
39119	chr2	169740660	169741660	107514	Tshz2	37.7	15.64	0.91	-1.21	37.7	18.34	18.76	18.91	15.64	28.74	33.27	51.1	22.6	13.48	18.93	15.33	19.79	21.15	20.85	23.29	12.59	11.37	20.85	14.71
52821	chr6	33480614	33481614	231986	Exoc4	12.49	5.31	0.84	-0.5	12.49	4.82	4.86	3.75	5.31	14.37	8.59	14.5	7.14	2.07	5.26	4.38	8.8	1.41	4.91	4.24	2.1	4.01	4.91	7.01
5808	chr10	26896326	26897326	124314	Arhgap18	12	9.61	-0.07	-0.03	12	4.41	6.06	4.86	9.61	11.98	10.2	13.81	5.95	5.19	2.1	6.57	8.8	2.82	6.13	6.35	2.1	14.04	4.29	10.51
54366	chr6	93524890	93525890	387573	Magi1	10.94	1.98	2.09	-1.3	10.94	5.42	8.15	3.28	1.98	9.58	8.05	15.19	4.76	5.19	6.31	4.38	8.8	11.28	2.45	5.29	2.1	2.01	1.84	2.1
8682	chr10	123691816	123692816	428240	Fam19a2	49.83	16.25	1.25	-2.39	49.83	21.28	13.06	7.02	16.25	49.1	52.06	48.34	44	10.37	9.47	13.14	17.59	8.46	7.36	7.41	6.29	22.73	14.1	11.91
49586	chr5	65079586	65080586	-27482	Klhl5	7.07	15.27	-1.48	-1.43	7.07	4.58	5.65	6.14	15.27	4.79	10.2	6.21	1.19	5.19	7.36	2.19	7.7	7.05	11.04	5.29	2.1	20.06	11.04	14.71
19767	chr14	32513123	32514123	102	Ercc6	40.59	39.09	-0.31	-0.38	40.59	26.11	20.69	29.78	39.09	50.3	34.88	36.6	34.49	23.85	19.99	16.42	23.09	22.56	28.21	29.65	31.47	40.11	38.63	38.54
11253	chr11	83742432	83743432	-4008	Wfdc21	11.82	1.93	2.21	-1.4	11.82	2.79	5.85	6.03	1.93	14.37	10.73	10.36	0	4.15	4.21	3.28	4.4	9.87	8.59	5.29	4.2	0	3.68	2.1
39199	chr2	171719933	171720933	242366	1700028P15Rik	4.4	28.54	-3.06	-5.45	4.4	2.54	1.94	2.17	28.54	2.4	8.05	2.76	2.38	2.07	3.16	0	4.4	1.41	1.23	3.18	2.1	22.73	25.75	37.14
6604	chr10	60097426	60098426	-8331	Spock2	28.61	10.41	1.1	-1.26	28.61	10.81	7.37	5.92	10.41	37.13	25.22	23.48	17.84	9.33	5.26	8.76	7.7	5.64	6.13	9.53	2.1	13.37	12.26	5.61
49838	chr5	74121661	74122661	28631	Snora26	27	9.81	1.14	-1.32	27	4.82	7.16	21.19	9.81	21.56	31.13	28.31	7.14	3.11	4.21	7.66	11	2.82	24.53	24.35	14.69	9.36	11.65	8.41
47885	chr4	150281102	150282102	-314	Rere	69.42	72.84	-0.43	-0.88	69.42	30.35	21.42	20.51	72.84	73.05	70.3	64.91	44	20.74	26.3	16.42	25.29	22.56	18.4	13.76	29.37	76.88	82.77	58.86
28577	chr17	51971175	51972175	88948	Gm20098	8.98	5.06	0.48	-0.21	8.98	4.07	3.76	8.48	5.06	8.38	7.51	11.05	5.95	4.15	2.1	4.38	5.5	1.41	8.59	8.47	8.39	6.69	4.29	4.2
52807	chr6	32946876	32947876	112884	Chchd3	19.37	7.22	1.04	-0.9	19.37	7.7	6.53	3.22	7.22	22.75	13.95	21.41	9.51	6.22	7.36	9.85	5.5	4.23	1.23	4.24	4.2	4.68	8.58	8.41
55002	chr6	117049359	117050359	-118676	Cxcl12	23.88	14.92	0.32	-0.23	23.88	8.09	10.19	10.88	14.92	21.56	20.39	29.69	10.7	8.3	5.26	6.57	9.9	14.1	7.36	10.59	14.69	10.7	21.46	12.61
17459	chr13	63901402	63902402	86662	Ercc6l2	25.93	21.36	-0.08	-0.05	25.93	8.24	14.46	16.73	21.36	20.36	33.27	24.17	14.27	4.15	6.31	19.7	11	12.69	12.26	16.94	20.98	26.07	23.3	14.71
59995	chr8	13455031	13456031	20072	Tmem255b	10.13	6.81	0.16	-0.06	10.13	9.65	10.92	15.03	6.81	14.37	9.12	6.91	5.95	10.37	12.62	8.76	9.9	14.1	13.49	12.71	18.88	6.69	6.74	7.01
40459	chr3	43250876	43251876	1508758	D3Ertd751e	14.24	6.02	0.9	-0.59	14.24	8.55	6.79	4.51	6.02	11.98	15.56	15.19	13.08	4.15	8.41	5.47	2.2	12.69	6.13	5.29	2.1	8.69	3.07	6.31
9508	chr11	24196100	24197100	115905	Bcl11a	7.47	19.01	-1.72	-1.99	7.47	6.3	5.75	5.55	19.01	2.4	9.66	10.36	9.51	6.22	3.16	3.28	5.5	8.46	6.13	4.24	6.29	16.05	22.07	18.92
11574	chr11	94235746	94236746	6333	Wfikkn2	16.1	23.87	-0.95	-1.2	16.1	12.77	16.77	17.07	23.87	19.16	13.95	15.19	14.27	11.41	12.62	17.51	18.69	14.1	12.26	15.88	23.08	26.07	19.62	25.92
39176	chr2	170837795	170838795	106488	Dok5	39.4	42.04	-0.46	-0.66	39.4	55.64	55.22	30.53	42.04	37.13	32.74	48.34	84.44	42.52	39.97	45.98	60.48	59.21	29.44	28.59	33.57	42.12	49.66	34.33
59520	chr7	140908195	140909195	2631	BC024386	17.94	18.43	-0.41	-0.32	17.94	15.9	9.14	14.31	18.43	19.16	18.78	15.88	22.6	9.33	15.78	7.66	9.9	9.87	13.49	8.47	20.98	24.74	16.55	14.01
18624	chr13	107783611	107784611	96714	1700006H21Rik	15.66	4.47	1.49	-1.04	15.66	6.95	5.43	7.89	4.47	13.17	19.32	14.5	8.32	7.26	5.26	6.57	5.5	4.23	11.04	4.24	8.39	0	4.29	9.11
32319	chr19	5529166	5530166	-19149	Snx32	31.95	30	-0.26	-0.25	31.95	15.65	18.7	17.9	30	28.74	23.61	43.5	16.65	13.48	16.83	16.42	14.29	25.38	14.72	18	20.98	32.09	31.27	26.63
20263	chr14	54700987	54701987	10687	Cebpe	10.65	9.75	-0.16	-0.07	10.65	5.18	7.84	4.57	9.75	13.17	9.12	9.67	7.14	1.04	7.36	7.66	8.8	7.05	7.36	4.24	2.1	7.35	13.49	8.41
20476	chr14	60894997	60895997	110931	Mipep	16.01	6	1.05	-0.8	16.01	6.66	8.31	6.5	6	14.37	15.03	18.64	9.51	3.11	7.36	8.76	7.7	8.46	3.68	9.53	6.29	6.69	4.29	7.01
18988	chr13	118053396	118054396	333356	Mrps30	35.84	18.69	0.58	-0.68	35.84	13.58	9.87	9.6	18.69	34.73	27.91	44.88	16.65	7.26	16.83	9.85	9.9	9.87	9.81	10.59	8.39	16.05	19.01	21.02
48575	chr5	21672932	21673932	27448	Armc10	27.33	26.58	-0.32	-0.3	27.33	7.84	12.9	26.15	26.58	34.73	23.08	24.17	13.08	5.19	5.26	15.33	12.1	11.28	40.47	23.29	14.69	24.74	31.88	23.12
37441	chr2	120154123	120155123	-48	Ehd4	83.11	67.74	-0.07	-0.08	83.11	49.95	50.46	38.76	67.74	93.41	70.3	85.62	80.87	31.11	37.87	53.64	58.28	39.47	33.11	32.82	50.35	59.5	82.77	60.96
778	chr1	38268211	38269211	136628	Gm5099	10.65	8.03	0.06	-0.02	10.65	7.86	4.96	4.74	8.03	13.17	9.12	9.67	4.76	8.3	10.52	9.85	2.2	2.82	3.68	6.35	4.2	5.35	11.04	7.71
27341	chr17	9905777	9906777	-130411	4930452A19Rik	24.29	24.58	-0.37	-0.33	24.29	12.91	10.82	10.71	24.58	17.96	20.39	34.53	17.84	11.41	9.47	8.76	11	12.69	11.04	12.71	8.39	29.42	23.3	21.02
32876	chr19	22960721	22961721	-180005	Klf9	28.45	10.43	1.07	-1.18	28.45	15.86	14	12.35	10.43	16.77	35.42	33.15	22.6	17.63	7.36	18.61	12.1	11.28	15.94	14.82	6.29	10.7	12.88	7.71
6297	chr10	45866318	45867318	59114	D030045P18Rik	13.21	6.12	0.79	-0.48	13.21	4.48	6.79	4.16	6.12	9.58	10.73	19.33	7.14	1.04	5.26	1.09	6.6	12.69	6.13	6.35	0	4.68	7.36	6.31
49121	chr5	43597702	43598702	-3720	C1qtnf7	12.3	4.47	1.15	-0.73	12.3	6.3	7.21	4.27	4.47	11.98	11.81	13.12	9.51	6.22	3.16	8.76	4.4	8.46	1.23	3.18	8.39	5.35	2.45	5.61
13696	chr12	44746617	44747617	327366	Stxbp6	5.41	11.9	-1.51	-1.24	5.41	6.86	6.58	4.44	11.9	3.59	6.44	6.21	5.95	6.22	8.41	5.47	4.4	9.87	4.91	2.12	6.29	10.03	16.55	9.11
23754	chr15	80159037	80160037	-14184	Mgat3	50.4	16.41	1.25	-2.29	50.4	34.34	26.84	24.41	16.41	55.09	33.27	62.84	40.44	37.34	25.24	31.74	21.99	26.79	25.76	28.59	18.88	18.05	22.07	9.11
10369	chr11	54997939	54998939	35032	Anxa6	14.59	12.64	-0.12	-0.06	14.59	6.91	7.37	11.29	12.64	16.77	16.64	10.36	7.14	6.22	7.36	8.76	7.7	5.64	8.59	10.59	14.69	9.36	15.94	12.61
25127	chr16	24442634	24443634	-4957	Lpp	27.36	36.28	-0.77	-1.19	27.36	10.27	11.23	11.1	36.28	33.53	16.1	32.45	13.08	10.37	7.36	15.33	9.9	8.46	12.26	6.35	14.69	33.43	36.18	39.24
13575	chr12	39873590	39874590	163286	Arl4a	22.12	59.35	-1.79	-6.13	22.12	5.52	4.44	2.99	59.35	14.37	20.93	31.07	7.14	3.11	6.31	4.38	3.3	5.64	3.68	5.29	0	56.83	58.86	62.36
18050	chr13	90501866	90502866	402989	Atp6ap1l	29.35	8.37	1.46	-1.82	29.35	15.98	11.96	10.93	8.37	21.56	25.76	40.74	24.97	12.45	10.52	15.33	12.1	8.46	15.94	8.47	8.39	13.37	6.13	5.61
40208	chr3	35280627	35281627	-358476	Mir6378	6.63	16.56	-1.66	-1.81	6.63	6.22	6.9	8.38	16.56	5.99	6.98	6.91	7.14	4.15	7.36	6.57	9.9	4.23	6.13	12.71	6.29	21.39	12.88	15.41
29685	chr17	88844462	88845462	-52986	Lhcgr	16.97	16.12	-0.27	-0.17	16.97	5.95	5.17	9.36	16.12	16.77	18.25	15.88	9.51	5.19	3.16	5.47	4.4	5.64	12.26	9.53	6.29	16.05	14.1	18.22
35812	chr2	60703010	60704010	19093	Itgb6	4.79	13.34	-1.79	-1.69	4.79	8.38	6.01	7.66	13.34	4.79	2.68	6.91	9.51	11.41	4.21	2.19	8.8	7.05	6.13	8.47	8.39	14.71	14.1	11.21
9369	chr11	19830322	19831322	-93620	Spred2	10.79	13.16	-0.65	-0.42	10.79	7.56	8.31	9.83	13.16	11.98	10.73	9.67	5.95	7.26	9.47	6.57	9.9	8.46	7.36	9.53	12.59	22.06	5.52	11.91
29433	chr17	83024983	83025983	52742	Gm19689	16.46	20.75	-0.74	-0.75	16.46	11.77	12.22	10.75	20.75	19.16	10.2	20.03	15.46	9.33	10.52	12.04	7.7	16.92	12.26	7.41	12.59	26.07	16.55	19.62
5863	chr10	28854379	28855379	131427	2310057J18Rik	26.2	8.85	1.24	-1.33	26.2	7.8	7.11	8.94	8.85	28.74	18.78	31.07	11.89	4.15	7.36	5.47	8.8	7.05	11.04	5.29	10.49	3.34	9.2	14.01
31700	chr18	72610956	72611956	-260387	Dcc	34.52	14.38	0.9	-1.18	34.52	18.82	22.88	18.19	14.38	39.52	24.69	39.36	26.16	15.56	14.73	24.08	21.99	22.56	13.49	18	23.08	12.03	12.88	18.22
3219	chr1	135765812	135766812	227	Phlda3	60.5	61.08	-0.37	-0.61	60.5	30.47	25.65	19.42	61.08	73.05	45.62	62.84	47.57	23.85	19.99	18.61	23.09	35.25	17.17	20.12	20.98	47.47	74.8	60.96
8161	chr10	108733670	108734670	-34010	Gm5136	15.46	15.59	-0.37	-0.25	15.46	8.09	8.83	8.84	15.59	16.77	7.51	22.1	10.7	7.26	6.31	9.85	11	5.64	8.59	9.53	8.39	12.7	21.46	12.61
28010	chr17	32992932	32993932	293	Zfp952	35.67	30.02	-0.13	-0.1	35.67	21.48	14.16	13.63	30.02	49.1	26.83	31.07	40.44	13.48	10.52	12.04	12.1	18.33	13.49	12.71	14.69	26.74	27.59	35.73
13863	chr12	52867789	52868789	168906	Akap6	26.98	15.72	0.47	-0.41	26.98	18.47	22.52	12.82	15.72	33.53	17.71	29.69	26.16	14.52	14.73	18.61	26.39	22.56	11.04	14.82	12.59	13.37	18.39	15.41
35799	chr2	60382814	60383814	-83	Ly75	69.38	52.64	0.04	-0.04	69.38	32.58	30.93	40.44	52.64	77.84	63.33	66.98	55.9	16.59	25.24	32.84	37.39	22.56	45.38	44.47	31.47	58.16	57.02	42.74
17766	chr13	75839565	75840565	179	Glrx	131.59	102.65	-0.01	-0.01	131.59	78.27	83.53	75.12	102.65	124.55	105.19	165.04	109.41	58.08	67.32	75.53	89.07	86	88.31	72	65.04	90.92	99.33	117.71
18425	chr13	101311599	101312599	57780	4933416M06Rik	47.92	9.48	1.95	-4.39	47.92	10.38	16.29	6.44	9.48	57.48	38.64	47.65	15.46	6.22	9.47	20.8	15.39	12.69	2.45	8.47	8.39	9.36	8.58	10.51
60279	chr8	25347821	25348821	-42051	5430421F17Rik	33.89	10.92	1.26	-1.72	33.89	24.22	17.76	5.15	10.92	35.93	28.44	37.29	30.92	23.85	17.88	15.33	15.39	22.56	4.91	4.24	6.29	10.7	17.17	4.9
27380	chr17	11513717	11514717	368972	D17Ertd648e	27.78	14.67	0.56	-0.51	27.78	12.56	10.66	6.67	14.67	20.36	28.44	34.53	17.84	9.33	10.52	7.66	8.8	15.51	14.72	3.18	2.1	17.38	14.72	11.91
27921	chr17	30287150	30288150	108530	Gm6402	15.42	2.89	2.2	-1.8	15.42	6.57	9.04	10.11	2.89	9.58	16.64	20.03	7.14	4.15	8.41	7.66	11	8.46	13.49	6.35	10.49	2.01	2.45	4.2
54380	chr6	94009972	94010972	-96782	Magi1	27.62	7.58	1.49	-1.92	27.62	5.07	13.11	8.42	7.58	26.35	26.83	29.69	4.76	4.15	6.31	14.23	11	14.1	7.36	7.41	10.49	6.02	5.52	11.21
61152	chr8	57410245	57411245	-45178	Scrg1	16.04	18.46	-0.58	-0.5	16.04	6.65	6.27	8.54	18.46	20.36	13.95	13.81	9.51	5.19	5.26	4.38	8.8	5.64	9.81	9.53	6.29	14.04	19.62	21.72
25940	chr16	50863333	50864333	80424	1700116B05Rik	7.33	25.02	-2.13	-3.07	7.33	5.21	3.24	5.37	25.02	1.2	6.98	13.81	8.32	4.15	3.16	2.19	3.3	4.23	9.81	0	6.29	22.06	31.27	21.72
2987	chr1	130299796	130300796	-122528	Gm15674	24.27	24.43	-0.35	-0.27	24.27	9.68	6.42	11.35	24.43	17.96	23.08	31.76	15.46	7.26	6.31	13.14	3.3	2.82	9.81	13.76	10.49	11.37	37.4	24.52
37360	chr2	118353807	118354807	19112	Gpr176	7.55	14.74	-1.29	-1.2	7.55	7.15	6.16	5.61	14.74	4.79	7.51	10.36	4.76	10.37	6.31	7.66	6.6	4.23	7.36	3.18	6.29	11.37	15.33	17.52
45544	chr4	72311988	72312988	111244	C630043F03Rik	15.22	9.07	0.41	-0.22	15.22	2.87	4.81	3.45	9.07	10.78	20.39	14.5	2.38	5.19	1.05	4.38	4.4	5.64	6.13	2.12	2.1	4.01	9.2	14.01
18330	chr13	98533865	98534865	-99300	2310005E17Rik	23.96	38.78	-1.01	-1.93	23.96	10.78	7.99	8.54	38.78	27.54	23.61	20.72	16.65	6.22	9.47	6.57	3.3	14.1	9.81	7.41	8.39	39.44	40.47	36.43
60954	chr8	47924613	47925613	65438	Wwc2	7.05	18.6	-1.7	-2.03	7.05	9.58	3.4	5.51	18.6	3.59	8.59	8.98	13.08	7.26	8.41	4.38	4.4	1.41	4.91	7.41	4.2	16.05	15.94	23.82
56671	chr7	34594640	34595640	57792	Kctd15	28.21	18.44	0.27	-0.21	28.21	12.82	8.88	6.68	18.44	32.33	24.69	27.62	15.46	9.33	13.67	5.47	9.9	11.28	7.36	10.59	2.1	18.72	23.3	13.31
37640	chr2	127133330	127134330	124	Ncaph	53.96	46.52	-0.15	-0.17	53.96	27.81	26.47	30.61	46.52	51.5	50.98	59.39	41.62	18.67	23.14	31.74	20.89	26.79	17.17	20.12	54.55	54.15	44.76	40.64
5426	chr10	14281166	14282166	263370	Adgrg6	12.38	28.71	-1.57	-2.83	12.38	6.17	5.9	11.46	28.71	11.98	13.42	11.74	5.95	4.15	8.41	6.57	5.5	5.64	12.26	9.53	12.59	28.75	30.04	27.33
39397	chr2	178967415	178968415	-447021	4930591A17Rik	84.37	15.01	2.11	-7.2	84.37	61.35	62.2	28.22	15.01	97	55.28	100.82	86.82	42.52	54.7	59.11	52.78	74.72	24.53	37.06	23.08	21.39	11.04	12.61
65079	chr9	68759891	68760891	-4955	9530091C08Rik	30.93	3.14	2.87	-4.32	30.93	13.16	10.6	6.49	3.14	28.74	29.52	34.53	15.46	11.41	12.62	14.23	7.7	9.87	11.04	4.24	4.2	2.67	1.84	4.9
17521	chr13	67222683	67223683	28677	Zfp455	30.86	6.18	1.92	-2.9	30.86	13.15	13.58	19.08	6.18	34.73	24.69	33.15	23.79	7.26	8.41	13.14	12.1	15.51	24.53	22.23	10.49	8.02	4.91	5.61
64753	chr9	57605750	57606750	31	Cplx3	10.32	13.3	-0.76	-0.56	10.32	11.82	7.16	11.3	13.3	7.19	13.42	10.36	8.32	14.52	12.62	7.66	11	2.82	15.94	13.76	4.2	12.03	11.04	16.82
12709	chr12	3235189	3236189	-102	Rab10os	96.73	108.45	-0.53	-1.79	96.73	78.67	74.02	73.95	108.45	98.2	79.43	112.56	120.12	60.15	55.75	64.58	71.47	86	72.36	57.17	92.31	100.95	111.59	112.81
28350	chr17	45886379	45887379	-5427	4930542M03Rik	15.7	14	-0.19	-0.1	15.7	10.51	11.18	5.79	14	17.96	13.95	15.19	10.7	13.48	7.36	9.85	11	12.69	3.68	5.29	8.39	10.03	21.46	10.51
3999	chr1	164366434	164367434	59262	Nme7	7.7	12.53	-1.12	-0.84	7.7	6.51	5.75	9.07	12.53	8.38	1.61	13.12	5.95	7.26	6.31	3.28	5.5	8.46	6.13	10.59	10.49	14.04	11.65	11.91
19271	chr14	14519840	14520840	173845	Il3ra	34.22	11.21	1.24	-1.74	34.22	18.47	12.95	12.11	11.21	32.33	26.83	43.5	26.16	14.52	14.73	17.51	14.29	7.05	18.4	9.53	8.39	9.36	16.55	7.71
63937	chr9	30218027	30219027	-208802	Snx19	22.54	8.61	0.96	-0.84	22.54	9.88	11.23	6.14	8.61	16.77	27.37	23.48	11.89	9.33	8.41	15.33	9.9	8.46	3.68	6.35	8.39	14.71	5.52	5.61
40840	chr3	58336059	58337059	-78161	Tsc22d2	38.22	19.9	0.61	-0.75	38.22	8.49	9.98	8.26	19.9	46.71	32.74	35.22	11.89	7.26	6.31	9.85	8.8	11.28	11.04	11.65	2.1	15.38	23.3	21.02
39213	chr2	172306343	172307343	-38734	Fam210b	36.66	5.72	2.33	-4.18	36.66	4.67	9.51	12.88	5.72	37.13	30.05	42.81	3.57	6.22	4.21	5.47	13.19	9.87	12.26	18	8.39	7.35	4.91	4.9
23725	chr15	79505464	79506464	-723	Kcnj4	19.61	23.96	-0.7	-0.76	19.61	9.88	9.51	12.21	23.96	19.16	13.42	26.24	11.89	9.33	8.41	8.76	9.9	9.87	13.49	6.35	16.78	16.71	30.66	24.52
21460	chr14	102763566	102764566	218566	Mir5130	15.77	3.07	2.07	-1.7	15.77	5.12	7.21	4.91	3.07	9.58	17.71	20.03	5.95	3.11	6.31	8.76	4.4	8.46	7.36	3.18	4.2	1.34	3.68	4.2
66500	chr9	118271182	118272182	121451	Gm17399	10.07	6.79	0.15	-0.06	10.07	5.13	6.59	3.45	6.79	13.17	8.05	8.98	5.95	2.07	7.36	2.19	7.7	9.87	6.13	2.12	2.1	8.02	6.74	5.61
66459	chr9	116872757	116873757	379226	Rbms3	13.64	29.04	-1.43	-2.44	13.64	8.44	12.23	10.39	29.04	10.78	12.88	17.26	10.7	6.22	8.41	9.85	19.79	7.05	4.91	5.29	20.98	33.43	26.37	27.33
34268	chr2	5714222	5715222	40	Camk1d	80.22	58.56	0.08	-0.09	80.22	30.02	39.64	31.63	58.56	91.02	58.5	91.15	35.68	22.82	31.56	42.69	39.58	36.66	38.02	23.29	33.57	54.82	66.22	54.65
56113	chr7	5019928	5020928	52	Zfp865	82.87	96.13	-0.57	-1.78	82.87	67.28	57.57	62.15	96.13	82.63	76.21	89.77	96.33	51.86	53.64	50.35	65.97	56.39	67.46	47.65	71.33	104.29	94.42	89.69
44229	chr4	19035287	19036287	-245063	Cngb3	41.03	20.91	0.62	-0.81	41.03	13.06	10.81	4.16	20.91	44.31	40.79	37.98	21.41	8.3	9.47	10.95	8.8	12.69	6.13	6.35	0	20.06	25.14	17.52
59184	chr7	129235781	129236781	-20813	Plpp4	26.14	8.01	1.34	-1.5	26.14	4.42	10.61	5.79	8.01	29.94	13.95	34.53	5.95	4.15	3.16	9.85	12.1	9.87	3.68	7.41	6.29	6.69	11.04	6.31
12313	chr11	113334191	113335191	-125022	4732490B19Rik	11.23	21.85	-1.3	-1.56	11.23	11.56	10.03	10.65	21.85	5.99	16.64	11.05	19.03	8.3	7.36	12.04	11	7.05	9.81	11.65	10.49	24.74	23.3	17.52
36467	chr2	81336730	81337730	697966	Nup35	86.5	13.74	2.28	-8.11	86.5	19.55	21.42	7.33	13.74	89.82	63.33	106.34	35.68	11.41	11.57	18.61	23.09	22.56	6.13	11.65	4.2	20.72	13.49	7.01
13016	chr12	15491198	15492198	309403	Mir6387	8.55	15.97	-1.31	-1.31	8.55	2.1	3.71	1.87	15.97	11.98	5.37	8.29	0	1.04	5.26	3.28	2.2	5.64	2.45	1.06	2.1	18.05	16.55	13.31
58099	chr7	91591009	91592009	-470885	Dlg2	15.03	8.38	0.47	-0.28	15.03	40.55	37.97	43.33	8.38	15.57	10.2	19.33	55.9	36.3	29.45	38.31	31.89	43.7	25.76	39.18	65.04	7.35	7.97	9.81
23685	chr15	78717927	78718927	-314	Elfn2	7.09	9.34	-0.64	-0.35	7.09	7.1	7.52	12.21	9.34	4.79	7.51	8.98	3.57	11.41	6.31	13.14	6.6	2.82	13.49	6.35	16.78	7.35	12.26	8.41
28028	chr17	33890238	33891238	-105	Kifc1	71.78	74.48	-0.41	-0.78	71.78	58.89	52.75	50.55	74.48	85.03	68.16	62.15	95.14	35.26	46.28	54.73	52.78	50.75	45.38	34.94	71.33	80.23	86.45	56.75
16490	chr13	30394062	30395062	58206	Agtr1a	38.41	4.4	2.89	-4.78	38.41	10.42	12.02	8.42	4.4	33.53	30.59	51.1	16.65	7.26	7.36	10.95	11	14.1	7.36	7.41	10.49	9.36	2.45	1.4
43057	chr3	135368727	135369727	21198	Slc9b1	12.48	4.47	1.16	-0.73	12.48	12.27	8.1	4.32	4.47	11.98	7.51	17.95	19.03	7.26	10.52	8.76	9.9	5.64	2.45	2.12	8.39	5.35	2.45	5.61
48652	chr5	24351273	24352273	-169	Kcnh2	55.42	66.55	-0.62	-1.45	55.42	25.9	22.15	27.71	66.55	56.29	59.57	50.41	28.54	19.71	29.45	22.99	20.89	22.56	29.44	22.23	31.47	64.85	71.74	63.06
5858	chr10	28684250	28685250	16390	Themis	16.84	19.73	-0.61	-0.56	16.84	5.06	2.66	4.44	19.73	13.17	21.47	15.88	4.76	6.22	4.21	3.28	3.3	1.41	4.91	2.12	6.29	18.72	20.85	19.62
54742	chr6	107893947	107894947	-170598	Setmar	28.5	16.53	0.45	-0.4	28.5	13.69	12.65	8.95	16.53	26.35	22.54	36.6	20.22	12.45	8.41	7.66	17.59	12.69	11.04	7.41	8.39	16.05	20.23	13.31
19841	chr14	34569989	34570989	18118	Ldb3	15.65	17.71	-0.54	-0.43	15.65	16.16	8.93	13.74	17.71	17.96	9.66	19.33	20.22	10.37	17.88	13.14	6.6	7.05	8.59	13.76	18.88	15.38	25.14	12.61
67539	chrX	98835692	98836692	54833	Ophn1	13.96	12.19	-0.14	-0.06	13.96	4.37	4.18	1.82	12.19	11.98	16.1	13.81	4.76	4.15	4.21	1.09	4.4	7.05	1.23	4.24	0	17.38	3.07	16.12
22311	chr15	15627294	15628294	-1150307	Cdh9	11.55	23.25	-1.36	-1.9	11.55	3.61	1.83	3.28	23.25	9.58	11.27	13.81	3.57	6.22	1.05	4.38	1.1	0	2.45	3.18	4.2	28.75	22.07	18.92
47384	chr4	135286397	135287397	-14137	Clic4	19.5	10.96	0.49	-0.33	19.5	10.31	14.37	8.17	10.96	25.15	16.1	17.26	14.27	12.45	4.21	15.33	16.49	11.28	9.81	2.12	12.59	17.38	9.2	6.31
34784	chr2	24342679	24343679	-2112	Il1rn	11.07	22.42	-1.39	-1.86	11.07	4.68	2.19	4.97	22.42	9.58	9.12	14.5	3.57	3.11	7.36	4.38	2.2	0	1.23	3.18	10.49	25.4	15.94	25.92
1746	chr1	72897784	72898784	-23419	Igfbp5	5.25	16.09	-2.02	-2.17	5.25	11.45	7.01	4.45	16.09	2.4	6.44	6.91	16.65	12.45	5.26	4.38	11	5.64	4.91	4.24	4.2	10.7	21.46	16.12
65279	chr9	75720018	75721018	-36462	Scg3	8.48	8.56	-0.34	-0.16	8.48	6.71	9.25	10.24	8.56	9.58	9.66	6.21	10.7	3.11	6.31	7.66	8.8	11.28	8.59	9.53	12.59	8.69	8.58	8.41
50917	chr5	115393863	115394863	-35322	Msi1	39.92	10.4	1.59	-2.88	39.92	13.94	15.36	12.99	10.4	45.51	34.88	39.36	17.84	15.56	8.41	15.33	11	19.74	14.72	13.76	10.49	12.03	7.97	11.21
11853	chr11	101119470	101120470	-129	Retreg3	72.07	90.33	-0.68	-2.23	72.07	36.36	34	26.78	90.33	80.24	67.62	68.36	55.9	32.15	21.04	38.31	34.09	29.61	24.53	24.35	31.47	89.59	88.91	92.49
4551	chr1	180903728	180904728	-46	Pycr2	67.31	63.95	-0.28	-0.44	67.31	27.84	30.91	30.34	63.95	77.84	63.33	60.77	34.49	28	21.04	29.56	20.89	42.29	33.11	22.23	35.67	68.19	66.22	57.45
3356	chr1	139421832	139422832	-51	Zbtb41	124.46	108.04	-0.17	-0.31	124.46	54.86	49.67	43.71	108.04	134.13	88.02	151.22	80.87	31.11	52.59	52.54	52.78	43.7	40.47	46.59	44.06	97.61	116.5	110
33573	chr19	43655455	43656455	-13948	Gm4311	6.38	9.53	-0.89	-0.52	6.38	10.04	6.95	10.4	9.53	4.79	10.2	4.14	7.14	11.41	11.57	10.95	9.9	0	12.26	6.35	12.59	10.03	7.36	11.21
23796	chr15	81729571	81730571	-152	Rangap1	58.96	52.89	-0.21	-0.27	58.96	33.92	26.86	36.23	52.89	64.67	49.37	62.84	54.71	19.71	27.35	22.99	30.79	26.79	31.89	24.35	52.45	46.13	55.8	56.75
62597	chr8	109565243	109566243	118	Dhx38	61.23	73.28	-0.63	-1.6	61.23	35.86	36.25	39.29	73.28	75.45	48.84	59.39	51.14	24.89	31.56	38.31	35.19	35.25	29.44	33.88	54.55	65.52	77.26	77.07
10663	chr11	65162212	65163212	249	Arhgap44	47.2	20.35	0.87	-1.43	47.2	26.74	19.94	14.33	20.35	45.51	47.76	48.34	41.62	22.82	15.78	24.08	13.19	22.56	13.49	12.71	16.78	18.05	27.59	15.41
44984	chr4	52429171	52430171	9293	Smc2os	23.63	7.03	1.4	-1.4	23.63	13.85	10.6	7.39	7.03	23.95	24.15	22.79	15.46	15.56	10.52	14.23	7.7	9.87	7.36	14.82	0	4.01	3.07	14.01
49998	chr5	80039073	80040073	-980998	Adgrl3	74.79	17.21	1.75	-5.72	74.79	24.05	13.9	3.93	17.21	82.63	59.57	82.17	34.49	13.48	24.19	14.23	17.59	9.87	1.23	6.35	4.2	12.03	22.07	17.52
26847	chr16	90418311	90419311	32414	Hunk	80.21	57.56	0.12	-0.16	80.21	30.89	29.25	32.51	57.56	82.63	70.3	87.7	40.44	25.93	26.3	32.84	25.29	29.61	34.34	27.53	35.67	58.83	56.41	57.45
1868	chr1	75770680	75771680	224718	Slc4a3	3.97	14.75	-2.35	-2.42	3.97	5.17	6.01	5.08	14.75	2.4	5.37	4.14	7.14	4.15	4.21	3.28	7.7	7.05	3.68	3.18	8.39	16.05	18.39	9.81
50739	chr5	110362975	110363975	18745	Lrcol1	62.83	44.99	0.13	-0.15	62.83	26.55	31.82	32.03	44.99	59.88	59.57	69.05	36.87	23.85	18.93	31.74	43.98	19.74	39.25	21.18	35.67	40.11	57.02	37.84
40810	chr3	57470287	57471287	45377	Tm4sf4	36.17	37.18	-0.4	-0.47	36.17	25.66	26.12	27.66	37.18	22.75	33.27	52.48	32.11	24.89	19.99	24.08	27.49	26.79	28.21	25.41	29.37	37.44	40.47	33.63
27146	chr17	3273423	3274423	-52650	Tiam2	13.03	15.8	-0.65	-0.54	13.03	10.36	10.09	9.35	15.8	10.78	14.49	13.81	15.46	12.45	3.16	4.38	13.19	12.69	12.26	7.41	8.39	14.04	16.55	16.82
24419	chr15	101245958	101246958	-20388	Nr4a1	78.07	82.39	-0.43	-0.92	78.07	41.66	35.52	44.35	82.39	97	68.16	69.05	57.08	33.19	34.71	40.5	40.68	25.38	40.47	29.65	62.94	78.22	102.4	66.56
24016	chr15	89314842	89315842	-31	Sbf1	65.03	66.31	-0.38	-0.63	65.03	51.01	37.51	48.61	66.31	50.3	72.99	71.81	72.55	36.3	44.18	31.74	38.49	42.29	47.83	49.76	48.25	74.21	73.58	51.15
8725	chr10	125786640	125787640	-179079	Lrig3	36.57	30.81	-0.1	-0.08	36.57	10.65	9.15	10.13	30.81	39.52	32.2	37.98	13.08	5.19	13.67	5.47	12.1	9.87	6.13	13.76	10.49	30.75	34.34	27.33
45504	chr4	70601010	70602010	-66582	Megf9	18.65	10.64	0.42	-0.27	18.65	10.81	10.35	12	10.64	23.95	11.27	20.72	9.51	15.56	7.36	8.76	11	11.28	8.59	12.71	14.69	14.04	7.36	10.51
12579	chr11	119052327	119053327	-11914	Cbx8	25.52	67	-1.73	-6.37	25.52	7.35	9.77	11.65	67	27.54	28.98	20.03	9.51	6.22	6.31	9.85	11	8.46	8.59	13.76	12.59	51.48	76.64	72.87
29167	chr17	73400173	73401173	-1377	Capn13	5.08	15.76	-1.87	-1.8	5.08	4.78	6.95	3.22	15.76	3.59	7.51	4.14	5.95	2.07	6.31	4.38	6.6	9.87	1.23	4.24	4.2	7.35	24.53	15.41
15024	chr12	96275687	96276687	-228965	1700019M22Rik	7.01	29.07	-2.41	-4.22	7.01	3.42	4.33	3.28	29.07	2.4	9.66	8.98	7.14	2.07	1.05	7.66	1.1	4.23	2.45	3.18	4.2	18.72	30.66	37.84
55272	chr6	125313400	125314400	-15	Ltbr	41.36	50.83	-0.65	-1.01	41.36	28.21	30.14	21.32	50.83	47.9	25.76	50.41	42.81	18.67	23.14	26.27	27.49	36.66	26.98	28.59	8.39	29.42	75.42	47.65
36457	chr2	80901706	80902706	262942	Nup35	28.4	9.72	1.2	-1.48	28.4	13.1	10.24	6.84	9.72	25.15	28.98	31.07	22.6	8.3	8.41	7.66	13.19	9.87	11.04	5.29	4.2	7.35	14.1	7.71
35488	chr2	49599940	49600940	-18874	Kif5c	8.1	45.49	-2.86	-8.56	8.1	8.32	6.8	4.68	45.49	7.19	10.2	6.91	8.32	13.48	3.16	6.57	11	2.82	2.45	5.29	6.29	47.47	44.15	44.84
6314	chr10	47446882	47447882	1202633	Snord14c	9.13	33.24	-2.24	-4.87	9.13	7.54	3.87	1.23	33.24	8.38	10.73	8.29	14.27	4.15	4.21	1.09	7.7	2.82	3.68	0	0	26.07	33.72	39.94
63064	chr8	122917508	122918508	69634	Cdh15	11.14	13.3	-0.56	-0.37	11.14	10.32	8.15	6.31	13.3	7.19	9.66	16.57	14.27	9.33	7.36	4.38	8.8	11.28	7.36	5.29	6.29	13.37	15.33	11.21
31812	chr18	75446612	75447612	-67533	Gm10532	7.89	21.86	-1.81	-2.68	7.89	20.1	18.17	11.4	21.86	7.19	7.51	8.98	23.79	21.78	14.73	19.7	16.49	18.33	11.04	8.47	14.69	18.72	25.14	21.72
59258	chr7	131415523	131416523	5422	Acadsb	15.85	10.11	0.29	-0.16	15.85	10.25	11.65	8.36	10.11	9.58	19.32	18.64	13.08	14.52	3.16	10.95	9.9	14.1	6.13	6.35	12.59	6.69	11.04	12.61
33720	chr19	47264027	47265027	9062	Mir6995	16.31	10.93	0.21	-0.11	16.31	9.69	12.33	10.75	10.93	17.96	12.34	18.64	15.46	5.19	8.41	14.23	14.29	8.46	12.26	5.29	14.69	6.69	13.49	12.61
5819	chr10	27194482	27195482	-194884	4930579H20Rik	10.59	19.73	-1.25	-1.44	10.59	4.07	3.5	2.63	19.73	8.38	7.51	15.88	5.95	4.15	2.1	3.28	4.4	2.82	3.68	0	4.2	14.71	22.07	22.42
68154	chrX	155592933	155593933	29894	Ptchd1	16.08	8.93	0.5	-0.32	16.08	5.17	7.26	8.95	8.93	15.57	16.1	16.57	7.14	3.11	5.26	7.66	9.9	4.23	18.4	4.24	4.2	11.37	9.81	5.61
37996	chr2	137097994	137098994	18026	Jag1	37.18	18.03	0.69	-0.87	37.18	14.34	18.9	13.91	18.03	45.51	27.37	38.67	19.03	13.48	10.52	28.46	9.9	18.33	12.26	10.59	18.88	17.38	17.78	18.92
13996	chr12	57623671	57624671	-5569	4921518K17Rik	6.57	17.74	-1.75	-2.12	6.57	4.37	4.96	5.04	17.74	5.99	7.51	6.21	4.76	5.19	3.16	5.47	6.6	2.82	2.45	8.47	4.2	17.38	19.01	16.82
45699	chr4	81307192	81308192	135123	Mpdz	7.42	23.42	-2.03	-3.21	7.42	7.98	4.76	8.24	23.42	8.38	6.98	6.91	8.32	11.41	4.21	3.28	11	0	3.68	6.35	14.69	21.39	20.85	28.03
22693	chr15	36422495	36423495	73739	Ankrd46	6.86	10.8	-1	-0.62	6.86	7.21	6.27	4.45	10.8	2.4	11.27	6.91	5.95	7.26	8.41	8.76	4.4	5.64	4.91	6.35	2.1	7.35	11.04	14.01
14460	chr12	77789135	77790135	379494	Fut8	16.17	13.33	-0.09	-0.04	16.17	6.42	4.02	9.19	13.33	16.77	14.49	17.26	3.57	6.22	9.47	6.57	5.5	0	8.59	10.59	8.39	8.02	16.55	15.41
66429	chr9	115896828	115897828	-12127	Gadl1	11.53	6.98	0.36	-0.17	11.53	4.71	3.97	4.28	6.98	9.58	9.12	15.88	4.76	7.26	2.1	2.19	5.5	4.23	1.23	7.41	4.2	8.69	7.36	4.9
41851	chr3	95173887	95174887	10048	Sema6c	14.62	21.42	-0.84	-0.82	14.62	10.62	12.65	13.91	21.42	9.58	22.54	11.74	13.08	10.37	8.41	8.76	16.49	12.69	12.26	10.59	18.88	26.07	22.07	16.12
57018	chr7	47007891	47008891	23	Spty2d1	91.96	86.89	-0.28	-0.52	91.96	50.1	47.89	50.48	86.89	114.97	69.77	91.15	67.79	40.45	42.07	52.54	41.78	49.34	44.15	31.76	75.53	88.92	97.49	74.27
6542	chr10	58739610	58740610	43365	BB019430	12.55	3.37	1.39	-0.85	12.55	5.82	5.07	7.84	3.37	9.58	8.05	20.03	5.95	3.11	8.41	6.57	4.4	4.23	9.81	7.41	6.29	6.69	0.61	2.8
47755	chr4	147442862	147443862	-109915	Zfp985	85.8	65.98	0.01	-0.01	85.8	22.84	25.76	19.47	65.98	105.39	62.25	89.77	39.25	13.48	15.78	28.46	31.89	16.92	25.76	13.76	18.88	62.17	64.99	70.77
45596	chr4	75259144	75260144	18648	Dmac1	11.84	38.61	-2.07	-5.01	11.84	5.16	2.4	6.14	38.61	8.38	16.1	11.05	7.14	5.19	3.16	4.38	0	2.82	3.68	4.24	10.49	37.44	44.76	33.63
1200	chr1	54898484	54899484	27403	Ankrd44	10.18	14.91	-0.91	-0.78	10.18	7.29	7.16	3.22	14.91	11.98	7.51	11.05	8.32	8.3	5.26	6.57	12.1	2.82	1.23	4.24	4.2	16.71	9.81	18.22
64400	chr9	45115371	45116371	-2005	Scn2b	16.13	10.02	0.36	-0.2	16.13	9.34	9.2	5.91	10.02	21.56	17.17	9.67	15.46	4.15	8.41	10.95	11	5.64	6.13	7.41	4.2	6.69	7.97	15.41
61938	chr8	84976145	84977145	2103	Junb	69.06	63.37	-0.22	-0.3	69.06	36.04	28.06	33.85	63.37	73.05	74.06	60.08	55.9	26.97	25.24	24.08	31.89	28.2	33.11	26.47	41.96	57.5	82.16	50.45
45296	chr4	62805477	62806477	132003	Rgs3	16.35	7.02	0.8	-0.55	16.35	12.57	9.98	8.08	7.02	14.37	13.95	20.72	17.84	7.26	12.62	10.95	7.7	11.28	14.72	9.53	0	2.67	8.58	9.81
51310	chr5	129103584	129104584	7334	Adgrd1	15.03	11.54	0.06	-0.03	15.03	7.25	8.78	18.2	11.54	19.16	15.56	10.36	7.14	8.3	6.31	7.66	8.8	9.87	28.21	18	8.39	12.03	13.49	9.11
1413	chr1	61353114	61354114	-24818	9530026F06Rik	28.82	9.09	1.32	-1.7	28.82	6.9	4.96	3.81	9.09	29.94	22	34.53	7.14	8.3	5.26	6.57	5.5	2.82	6.13	5.29	0	8.69	12.26	6.31
36033	chr2	68873630	68874630	12689	Cers6	42.77	20.37	0.69	-0.91	42.77	24.72	23.46	19.95	20.37	44.31	27.37	56.62	34.49	20.74	18.93	20.8	24.19	25.38	20.85	20.12	18.88	24.07	20.23	16.82
43423	chr3	146072457	146073457	35079	Wdr63	10.51	10.24	-0.35	-0.18	10.51	10.96	7.84	7.01	10.24	11.98	11.27	8.29	21.41	6.22	5.26	4.38	12.1	7.05	7.36	3.18	10.49	11.37	11.65	7.71
33209	chr19	32366077	32367077	-17261	Sgms1	19.37	9.16	0.75	-0.61	19.37	11.2	5.43	8.88	9.16	20.36	17.71	20.03	9.51	8.3	15.78	6.57	5.5	4.23	9.81	6.35	10.49	8.02	11.04	8.41
57880	chr7	82496524	82497524	151504	Saxo2	20.92	4.69	1.8	-1.88	20.92	3.98	6.06	4.74	4.69	21.56	17.71	23.48	3.57	2.07	6.31	7.66	7.7	2.82	3.68	6.35	4.2	6.02	2.45	5.61
55590	chr6	136816328	136817328	8580	H2afj	12.92	17.55	-0.85	-0.76	12.92	10.78	7	6.55	17.55	14.37	11.27	13.12	8.32	11.41	12.62	7.66	7.7	5.64	4.91	6.35	8.39	27.41	14.72	10.51
32045	chr18	82691026	82692026	1208	Zfp236	19.2	13.11	0.15	-0.08	19.2	11.37	14.68	12.1	13.11	25.15	14.49	17.95	14.27	10.37	9.47	13.14	15.39	15.51	18.4	7.41	10.49	8.69	15.94	14.71
43328	chr3	143783890	143784890	-72247	Gm6260	57.46	18.05	1.31	-2.96	57.46	17.14	9.35	5.16	18.05	57.48	52.06	62.84	27.35	9.33	14.73	7.66	7.7	12.69	4.91	8.47	2.1	16.05	12.88	25.22
53439	chr6	54681105	54682105	-19	Mturn	81.15	68.28	-0.12	-0.15	81.15	45.68	47.89	30.41	68.28	101.79	62.25	79.41	61.84	37.34	37.87	50.35	43.98	49.34	34.34	25.41	31.47	62.17	70.51	72.17
27972	chr17	32024138	32025138	9870	Hsf2bp	22.59	9.35	0.9	-0.86	22.59	12.86	12.95	14.75	9.35	26.35	19.32	22.1	16.65	12.45	9.47	13.14	8.8	16.92	14.72	16.94	12.59	6.69	12.26	9.11
29481	chr17	83889601	83890601	-35683	C430042M11Rik	16.25	28.52	-1.16	-1.71	16.25	12.76	11.65	15.67	28.52	22.75	12.88	13.12	14.27	12.45	11.57	14.23	16.49	4.23	19.62	12.71	14.69	25.4	25.14	35.03
61118	chr8	56343811	56344811	49759	Hpgd	64.79	31.83	0.67	-1.29	64.79	35.61	30.41	6.92	31.83	70.66	47.76	75.96	61.84	17.63	27.35	24.08	31.89	35.25	4.91	11.65	4.2	30.75	32.5	32.23
67152	chrX	51400060	51401060	-194570	Mbnl3	16.2	3.78	1.78	-1.51	16.2	9.17	8.25	6.14	3.78	16.77	11.81	20.03	11.89	10.37	5.26	7.66	4.4	12.69	11.04	3.18	4.2	4.68	2.45	4.2
63237	chr8	127183651	127184651	-115461	Pard3	20.7	14.86	0.13	-0.06	20.7	14.28	19.69	10.93	14.86	16.77	17.71	27.62	16.65	8.3	17.88	16.42	18.69	23.97	15.94	6.35	10.49	5.35	14.72	24.52
65665	chr9	89210990	89211990	106	Mthfs	26.55	33.73	-0.72	-1.08	26.55	14.62	9.72	12.45	33.73	26.35	18.78	34.53	16.65	9.33	17.88	5.47	11	12.69	18.4	6.35	12.59	34.1	35.56	31.53
55219	chr6	124541892	124542892	-33	C1s1	23.59	31.92	-0.8	-1.11	23.59	8.7	7.58	12.57	31.92	16.77	23.61	30.38	8.32	7.26	10.52	4.38	9.9	8.46	6.13	12.71	18.88	28.75	26.37	40.64
38047	chr2	138708277	138709277	-111152	Mir1952	15.87	21.09	-0.74	-0.73	15.87	7.9	4.96	6.38	21.09	9.58	21.47	16.57	14.27	3.11	6.31	5.47	6.6	2.82	1.23	9.53	8.39	22.73	20.23	20.32
23444	chr15	68415116	68416116	-74327	Mir30d	11.81	7.14	0.32	-0.15	11.81	8	5.17	6.21	7.14	9.58	13.42	12.43	8.32	6.22	9.47	6.57	3.3	5.64	4.91	9.53	4.2	6.69	4.91	9.81
68283	chrX	163050517	163051517	-86418	S100g	8.97	30.16	-2.03	-3.83	8.97	7.28	6.63	8.17	30.16	9.58	11.81	5.52	7.14	2.07	12.62	8.76	5.5	5.64	9.81	2.12	12.59	23.4	30.66	36.43
34130	chr19	60070654	60071654	-73521	E330013P04Rik	3.43	22.28	-3.08	-4.6	3.43	3.32	3.87	4.8	22.28	2.4	3.76	4.14	4.76	3.11	2.1	2.19	6.6	2.82	4.91	5.29	4.2	21.39	25.14	20.32
32071	chr18	83106305	83107305	-186245	4930592I03Rik	11.14	3.92	1.1	-0.61	11.14	6.41	7.83	9.07	3.92	13.17	11.27	8.98	3.57	7.26	8.41	9.85	6.6	7.05	6.13	10.59	10.49	6.69	3.68	1.4
1236	chr1	55940026	55941026	9285	9130227L01Rik	12.62	4.33	1.14	-0.69	12.62	5.07	3.97	4.43	4.33	13.17	10.2	14.5	4.76	5.19	5.26	2.19	5.5	4.23	4.91	0	8.39	6.69	4.91	1.4
24801	chr16	13447523	13448523	-1500	Mir193b	40.43	36.13	-0.2	-0.2	40.43	18.17	21.83	20.09	36.13	45.51	34.35	41.43	27.35	13.48	13.67	26.27	20.89	18.33	8.59	28.59	23.08	35.43	38.63	34.33
2413	chr1	95122239	95123239	-190889	Fam174a	11.97	3.93	1.23	-0.74	11.97	4.13	2.03	1.4	3.93	17.96	9.66	8.29	7.14	1.04	4.21	3.28	0	2.82	0	0	4.2	6.02	3.68	2.1
32266	chr19	4438940	4439940	3	Rhod	17.69	25.38	-0.86	-1	17.69	17.58	12.39	16.61	25.38	9.58	24.15	19.33	21.41	16.59	14.73	13.14	19.79	4.23	17.17	15.88	16.78	21.39	28.82	25.92
51350	chr5	130327627	130328627	-41331	Caln1	8.62	30.84	-2.17	-1.36	8.62	6.31	4.96	5.55	30.84	8.38	16.1	1.38	9.51	4.15	5.26	7.66	4.4	2.82	6.13	2.12	8.39	24.74	35.56	32.23
9730	chr11	32693445	32694445	51390	Fbxw11	17.34	20.5	-0.6	-0.54	17.34	13.23	11.18	11.8	20.5	17.96	16.1	17.95	16.65	7.26	15.78	8.76	12.1	12.69	4.91	7.41	23.08	21.39	13.49	26.63
30722	chr18	39068118	39069118	75473	Arhgap26	23.41	6.07	1.6	-1.77	23.41	10.24	9.66	8.78	6.07	32.33	17.17	20.72	11.89	7.26	11.57	13.14	8.8	7.05	7.36	10.59	8.39	5.35	7.97	4.9
15501	chr12	110844755	110845755	4226	4921507G05Rik	54.82	65.28	-0.61	-1.47	54.82	43.82	33.47	32.63	65.28	55.09	47.23	62.15	58.27	31.11	42.07	40.5	27.49	32.43	29.44	28.59	39.86	64.18	69.29	62.36
48518	chr5	19908647	19909647	1629	Magi2	38.76	13	1.23	-2	38.76	17.87	15.26	11.29	13	40.72	37.57	37.98	28.54	11.41	13.67	9.85	17.59	18.33	15.94	11.65	6.29	16.05	11.04	11.91
21012	chr14	78649534	78650534	-5583	Dgkh	13.27	17.12	-0.72	-0.62	13.27	5.82	8.36	7.6	17.12	9.58	10.2	20.03	5.95	4.15	7.36	7.66	13.19	4.23	12.26	4.24	6.29	14.04	18.39	18.92
63533	chr9	14813018	14814018	28864	Mre11a	14.11	11.72	-0.11	-0.05	14.11	5.21	7.58	4.86	11.72	19.16	10.73	12.43	8.32	3.11	4.21	6.57	7.7	8.46	6.13	4.24	4.2	17.38	7.97	9.81
24650	chr16	7978311	7979311	446325	Tmem114	5.72	17.14	-1.97	-2.31	5.72	4.8	4.23	3.28	17.14	7.19	3.76	6.21	7.14	6.22	1.05	5.47	4.4	2.82	2.45	3.18	4.2	10.7	19.01	21.72
3990	chr1	164138415	164139415	-12920	F5	32.51	28.69	-0.18	-0.15	32.51	12.6	13.27	9.71	28.69	41.92	25.22	30.38	10.7	16.59	10.52	13.14	15.39	11.28	12.26	10.59	6.29	24.07	36.79	25.22
60823	chr8	44801472	44802472	-148236	Fat1	55.02	30.02	0.5	-0.75	55.02	15.61	16.97	16.14	30.02	62.27	41.32	61.46	23.79	8.3	14.73	18.61	15.39	16.92	14.72	12.71	20.98	30.75	31.27	28.03
28035	chr17	33955262	33956262	-38	Vps52	44.82	54.75	-0.64	-1.24	44.82	32.02	27.26	23.57	54.75	58.68	39.18	36.6	41.62	18.67	35.76	28.46	20.89	32.43	23.3	22.23	25.18	48.8	55.18	60.26
17492	chr13	64497255	64498255	37	Fam240b	42.66	18.21	0.84	-1.28	42.66	7.79	14.15	8.19	18.21	38.32	36.49	53.17	11.89	6.22	5.26	18.61	15.39	8.46	9.81	8.47	6.29	16.71	19.01	18.92
57684	chr7	76164698	76165698	-64689	Agbl1	22.23	40.65	-1.22	-2.6	22.23	15.34	12.69	11.82	40.65	20.36	26.3	20.03	17.84	14.52	13.67	16.42	13.19	8.46	12.26	14.82	8.39	39.44	45.37	37.14
11986	chr11	103332214	103333214	11988	Arhgap27	12.1	27.34	-1.59	-2.56	12.1	13.16	15.1	14.45	27.34	8.38	13.42	14.5	15.46	11.41	12.62	13.14	11	21.15	8.59	15.88	18.88	35.43	22.07	24.52
25385	chr16	32515864	32516864	20083	Zdhhc19	27.08	15.56	0.47	-0.4	27.08	24.09	17.82	19.57	15.56	27.54	29.52	24.17	35.68	15.56	21.04	14.23	20.89	18.33	13.49	11.65	33.57	11.37	22.69	12.61
12818	chr12	8207711	8208711	84	Ldah	39.03	31.09	-0.02	-0.01	39.03	25.38	22.05	35.14	31.09	26.35	42.4	48.34	41.62	13.48	21.04	17.51	27.49	21.15	45.38	26.47	33.57	33.43	32.5	27.33
29253	chr17	78075597	78076597	-124151	Crim1	8.58	12.29	-0.81	-0.56	8.58	3.63	3.03	2.52	12.29	4.79	11.27	9.67	3.57	3.11	4.21	4.38	3.3	1.41	1.23	2.12	4.2	9.36	13.49	14.01
61181	chr8	57934614	57935614	-282059	Galnt7	38.24	9.54	1.62	-2.69	38.24	12.67	13.06	8.53	9.54	34.73	26.83	53.17	20.22	7.26	10.52	12.04	8.8	18.33	9.81	5.29	10.49	8.02	12.88	7.71
33324	chr19	36119551	36120551	-207	Ankrd1	21.08	6.14	1.39	-1.41	21.08	13.87	10.87	7.49	6.14	22.75	17.71	22.79	15.46	11.41	14.73	12.04	12.1	8.46	9.81	8.47	4.2	8.69	5.52	4.2
63821	chr9	25498503	25499503	17406	Eepd1	26.03	16.55	0.33	-0.25	26.03	12.27	9.19	8.59	16.55	21.56	22	34.53	19.03	7.26	10.52	13.14	8.8	5.64	11.04	6.35	8.39	9.36	22.07	18.22
14626	chr12	82177793	82178793	8277	Sipa1l1	5.28	23.6	-2.61	-3.91	5.28	2.67	5.33	0.71	23.6	1.2	4.29	10.36	5.95	2.07	0	7.66	5.5	2.82	0	2.12	0	19.39	22.69	28.73
4090	chr1	166964158	166965158	35072	Gm16701	13.92	8.36	0.36	-0.18	13.92	8.49	8.83	8	8.36	11.98	6.98	22.79	11.89	7.26	6.31	8.76	12.1	5.64	6.13	3.18	14.69	4.68	9.2	11.21
45954	chr4	88781074	88782074	-557	Ifnz	3.66	6.12	-1.13	-0.53	3.66	7.82	1.83	10.35	6.12	5.99	4.29	0.69	3.57	7.26	12.62	3.28	2.2	0	11.04	9.53	10.49	6.02	6.74	5.61
50513	chr5	102735836	102736836	-32474	Arhgap24	3.42	17.61	-2.59	-2.81	3.42	5.51	7	2.17	17.61	0	7.51	2.76	7.14	6.22	3.16	7.66	7.7	5.64	1.23	5.29	0	20.06	20.85	11.91
62255	chr8	95951495	95952495	-63630	Got2	15.91	23.53	-0.93	-0.93	15.91	15.84	8.05	11.51	23.53	8.38	14.49	24.86	21.41	13.48	12.62	5.47	8.8	9.87	13.49	6.35	14.69	11.37	26.98	32.23
38641	chr2	156420552	156421552	143	Epb41l1	18.99	23.87	-0.69	-0.8	18.99	19.03	16.66	16.73	23.87	16.77	18.78	21.41	22.6	15.56	18.93	19.7	17.59	12.69	12.26	16.94	20.98	24.74	25.14	21.72
30839	chr18	44557483	44558483	-103682	A930012L18Rik	22.53	16.93	0.03	-0.02	22.53	9.05	8.98	7.66	16.93	15.57	16.1	35.91	8.32	6.22	12.62	7.66	6.6	12.69	6.13	8.47	8.39	18.72	15.94	16.12
29923	chr18	10181517	10182517	-225	Rock1	145.77	129.02	-0.18	-0.44	145.77	80.74	72.5	65.92	129.02	150.9	128.27	158.13	110.6	64.3	67.32	67.87	69.27	80.36	57.64	64.59	75.53	119.67	139.18	128.22
58334	chr7	99424487	99425487	-41017	Klhl35	33.33	10.83	1.23	-1.62	33.33	19.81	18.07	16.68	10.83	28.74	33.27	37.98	24.97	17.63	16.83	17.51	19.79	16.92	18.4	16.94	14.69	18.05	6.74	7.71
60377	chr8	27260050	27261050	223	Eif4ebp1	68.26	50.15	0.09	-0.09	68.26	41.57	27.89	32.84	50.15	71.86	54.2	78.72	54.71	34.23	35.76	32.84	29.69	21.15	25.76	41.29	31.47	49.47	53.34	47.65
1523	chr1	64787322	64788322	-50072	Fzd5	16.99	20.86	-0.65	-0.6	16.99	7.59	7.74	8.13	20.86	20.36	20.93	9.67	7.14	11.41	4.21	6.57	11	5.64	8.59	7.41	8.39	22.73	20.23	19.62
5613	chr10	21011913	21012913	-28407	Ahi1	20.89	5.03	1.62	-1.58	20.89	6.91	11.55	18.48	5.03	14.37	28.98	19.33	7.14	5.19	8.41	10.95	11	12.69	12.26	18	25.18	6.69	4.91	3.5
3578	chr1	152828692	152829692	29039	Ncf2	18.37	4.73	1.65	-1.48	18.37	15.47	11.65	7.2	4.73	20.36	20.93	13.81	21.41	17.63	7.36	8.76	12.1	14.1	3.68	9.53	8.39	2.01	7.97	4.2
63838	chr9	27131688	27132688	23233	Jam3	6.53	11.3	-1.14	-0.83	6.53	4.77	6.64	7.97	11.3	4.79	3.76	11.05	5.95	3.11	5.26	4.38	9.9	5.64	4.91	12.71	6.29	10.7	14.1	9.11
44818	chr4	45724953	45725953	38770	Gm12409	17.34	7.17	0.91	-0.7	17.34	11.08	6.74	7.44	7.17	17.96	20.93	13.12	15.46	7.26	10.52	7.66	5.5	7.05	1.23	10.59	10.49	4.68	9.81	7.01
65446	chr9	81863134	81864134	-36	Mei4	78.41	58.49	0.05	-0.06	78.41	38.59	33.28	33.81	58.49	83.83	59.57	91.84	58.27	23.85	33.66	29.56	40.68	29.61	31.89	33.88	35.67	61.51	50.89	63.06
6546	chr10	58914650	58915650	101791	Sh3rf3	18.44	5.36	1.44	-1.28	18.44	7.6	7.94	5.1	5.36	17.96	16.64	20.72	7.14	7.26	8.41	6.57	8.8	8.46	3.68	7.41	4.2	8.02	2.45	5.61
31355	chr18	61637698	61638698	-1455	Bvht	18.62	24.09	-0.72	-0.84	18.62	14.04	17.08	21.06	24.09	17.96	17.17	20.72	11.89	18.67	11.57	20.8	12.1	18.33	22.08	20.12	20.98	27.41	24.53	20.32
63651	chr9	20754381	20755381	-8585	Olfm2	14.81	8.75	0.41	-0.23	14.81	6.7	6.27	6.38	8.75	17.96	16.1	10.36	10.7	5.19	4.21	6.57	6.6	5.64	8.59	6.35	4.2	11.37	8.58	6.31
44080	chr4	12088857	12089857	-13	Rbm12b2	32.2	33.84	-0.43	-0.55	32.2	34.99	26.74	29.22	33.84	35.93	26.83	33.84	55.9	25.93	23.14	30.65	24.19	25.38	24.53	21.18	41.96	32.76	33.72	35.03
53425	chr6	54225005	54226005	-39353	Chn2	12.67	4.31	1.15	-0.7	12.67	9.42	8.67	8.94	4.31	13.17	14.49	10.36	9.51	12.45	6.31	8.76	8.8	8.46	11.04	5.29	10.49	4.68	1.23	7.01
34425	chr2	10567032	10568032	49377	Mir669h	23.26	9.45	0.95	-0.92	23.26	11.5	8.15	6.14	9.45	19.16	20.93	29.69	17.84	11.41	5.26	9.85	13.19	1.41	11.04	5.29	2.1	13.37	7.97	7.01
33607	chr19	44582370	44583370	20016	Hif1an	20.13	17.61	-0.17	-0.11	20.13	11.68	14.73	18.96	17.61	22.75	20.39	17.26	13.08	9.33	12.62	13.14	9.9	21.15	14.72	21.18	20.98	18.05	16.55	18.22
15375	chr12	107118810	107119810	-402986	4933406K04Rik	11.97	3.98	1.17	-0.73	11.97	4.38	5.01	11.63	3.98	14.37	9.12	12.43	4.76	2.07	6.31	3.28	3.3	8.46	8.59	7.41	18.88	4.68	3.07	4.2
43330	chr3	143807239	143808239	-95596	Gm6260	31.12	8.28	1.54	-2.23	31.12	24.69	19.22	11.41	8.28	33.53	22.54	37.29	33.3	17.63	23.14	19.7	15.39	22.56	11.04	12.71	10.49	8.02	9.81	7.01
42253	chr3	107333120	107334120	-331	Rbm15	185.25	204.23	-0.5	-2.37	185.25	146.74	133.58	128.65	204.23	217.96	146.51	191.28	218.83	113.05	108.34	125.89	145.14	129.7	109.16	98.47	178.33	227.31	201.11	184.28
30478	chr18	32523947	32524947	35587	Gypc	8.6	17.25	-1.38	-1.5	8.6	5.71	6.95	8.3	17.25	8.38	9.12	8.29	3.57	7.26	6.31	5.47	5.5	9.87	4.91	7.41	12.59	20.06	18.39	13.31
64515	chr9	49703904	49704904	94665	Ncam1	13.25	10.14	-0.02	-0.01	13.25	4.28	6.63	3.4	10.14	14.37	15.03	10.36	2.38	5.19	5.26	7.66	6.6	5.64	4.91	3.18	2.1	12.03	8.58	9.81
45462	chr4	68864811	68865811	89086	Brinp1	21.5	12.38	0.42	-0.29	21.5	28.14	28.25	29.49	12.38	16.77	11.81	35.91	41.62	22.82	19.99	38.31	25.29	21.15	36.79	28.59	23.08	10.7	11.04	15.41
23205	chr15	59054493	59055493	27033	Mtss1	16.34	16.67	-0.37	-0.27	16.34	10.18	11.07	11.35	16.67	14.37	18.78	15.88	10.7	10.37	9.47	15.33	6.6	11.28	9.81	13.76	10.49	12.7	18.39	18.92
2233	chr1	89454380	89455380	69	Agap1	67.67	75.8	-0.52	-1.28	67.67	18.7	17.97	20.7	75.8	65.87	61.18	75.96	22.6	12.45	21.04	18.61	19.79	15.51	14.72	18	29.37	61.51	84.61	81.28
62652	chr8	111328397	111329397	9308	Mlkl	14.99	3.25	1.84	-1.47	14.99	13.19	11.08	5.61	3.25	11.98	19.86	13.12	16.65	14.52	8.41	10.95	11	11.28	0	4.24	12.59	2.67	4.29	2.8
52853	chr6	34684586	34685586	-24358	Cald1	18.86	22.54	-0.61	-0.61	18.86	17.27	12.38	4.45	22.54	16.77	17.71	22.1	22.6	16.59	12.62	13.14	9.9	14.1	4.91	6.35	2.1	18.05	30.66	18.92
56520	chr7	28527667	28528667	5331	Ifnl3	12.69	9.53	0.02	-0.01	12.69	11.49	7.89	10.41	9.53	11.98	10.2	15.88	8.32	9.33	16.83	4.38	6.6	12.69	12.26	8.47	10.49	12.03	6.74	9.81
68260	chrX	162158601	162159601	340	Nhs	52.1	37.71	0.08	-0.08	52.1	26.24	29.83	22.22	37.71	53.89	40.25	62.15	36.87	15.56	26.3	25.18	31.89	32.43	24.53	19.06	23.08	38.78	33.72	40.64
66928	chrX	17571479	17572479	28	Fundc1	84.49	71.69	-0.13	-0.17	84.49	47.69	46.9	46.37	71.69	91.02	59.57	102.89	76.11	25.93	41.02	44.88	45.08	50.75	45.38	39.18	54.55	70.2	84.61	60.26
33670	chr19	46135653	46136653	4254	Elovl3	27.68	25.84	-0.25	-0.21	27.68	15.24	16.88	16.79	25.84	31.14	33.27	18.64	23.79	12.45	9.47	10.95	24.19	15.51	13.49	18	18.88	25.4	27.59	24.52
46041	chr4	94007060	94008060	549236	Caap1	26.18	19.68	0.06	-0.04	26.18	10.59	12.33	8.02	19.68	15.57	28.44	34.53	11.89	8.3	11.57	10.95	17.59	8.46	13.49	8.47	2.1	20.06	21.46	17.52
35617	chr2	52785125	52786125	-43476	Stam2	20.84	14.73	0.13	-0.07	20.84	19.06	10.66	6.27	14.73	25.15	16.64	20.72	32.11	12.45	12.62	15.33	11	5.64	6.13	8.47	4.2	8.02	16.55	19.62
43025	chr3	134015115	134016115	-220880	Cxxc4	14.99	8.53	0.45	-0.26	14.99	7.2	6.9	13.4	8.53	17.96	16.64	10.36	14.27	3.11	4.21	7.66	8.8	4.23	15.94	15.88	8.39	10.7	8.58	6.31
37629	chr2	126674887	126675887	-35	Gabpb1	62.14	77.42	-0.67	-1.78	62.14	28.41	28.63	26.53	77.42	62.27	65.47	58.69	39.25	21.78	24.19	25.18	29.69	31.02	26.98	16.94	35.67	82.23	87.68	62.36
32702	chr19	16735264	16736264	45169	Vps13a	20.7	4.06	2.02	-2.02	20.7	6.6	3.24	1.17	4.06	22.75	24.15	15.19	8.32	7.26	4.21	0	5.5	4.23	2.45	1.06	0	5.35	1.23	5.61
23127	chr15	56766110	56767110	-72064	Has2	69.25	21.05	1.34	-3.55	69.25	46.07	49.74	22.95	21.05	73.05	50.45	84.24	63.03	38.37	36.81	42.69	57.18	49.34	24.53	27.53	16.78	23.4	15.94	23.82
20199	chr14	52316281	52317281	-458	Sall2	67.9	23.77	1.14	-2.71	67.9	25.67	31.09	29.12	23.77	81.44	50.45	71.81	32.11	23.85	21.04	26.27	37.39	29.61	29.44	24.35	33.57	30.75	20.23	20.32
52994	chr6	39024409	39025409	42677	1700025N23Rik	17.2	17.48	-0.33	-0.2	17.2	7.3	9.41	4.39	17.48	7.19	25.76	18.64	8.32	6.22	7.36	7.66	12.1	8.46	3.68	5.29	4.2	13.37	15.94	23.12
64663	chr9	54764266	54765266	18	Crabp1	12.11	19.73	-1.05	-1.07	12.11	8.75	9.98	8.54	19.73	10.78	9.66	15.88	9.51	6.22	10.52	5.47	13.19	11.28	9.81	7.41	8.39	18.72	11.04	29.43
58583	chr7	109993049	109994049	-7319	Tmem41b	3.91	11.25	-1.85	-1.36	3.91	7.44	8.99	11.98	11.25	0	4.83	6.91	11.89	7.26	3.16	5.47	8.8	12.69	8.59	8.47	18.88	12.03	14.72	7.01
23140	chr15	57471368	57472368	5757	Slc22a22	13.55	39.9	-1.91	-4.39	13.55	4.6	5.64	3.51	39.9	11.98	20.39	8.29	2.38	9.33	2.1	5.47	4.4	7.05	7.36	3.18	0	42.79	40.47	36.43
29513	chr17	84465735	84466735	-27	Thada	64.37	52.44	-0.06	-0.06	64.37	26	31.09	25.4	52.44	77.84	57.96	57.31	40.44	22.82	14.73	22.99	40.68	29.61	24.53	30.7	20.98	54.15	47.83	55.35
59916	chr8	11187192	11188192	-125113	Col4a2	17.59	17.64	-0.34	-0.24	17.59	13.85	13.53	12.5	17.64	19.16	12.88	20.72	15.46	13.48	12.62	15.33	15.39	9.87	12.26	8.47	16.78	16.05	21.46	15.41
62455	chr8	105496433	105497433	-31	Zdhhc1	35.02	33.5	-0.26	-0.27	35.02	19.89	18.13	21.47	33.5	28.74	39.71	36.6	27.35	20.74	11.57	20.8	20.89	12.69	15.94	23.29	25.18	28.08	37.4	35.03
4461	chr1	178551239	178552239	22614	Kif26b	21.47	5.04	1.73	-1.83	21.47	12.12	13.27	13.87	5.04	16.77	19.32	28.31	15.46	10.37	10.52	13.14	15.39	11.28	18.4	12.71	10.49	6.02	4.91	4.2
19001	chr13	118472117	118473117	-83551	1700003P14Rik	12.49	23.25	-1.24	-1.67	12.49	1.78	3.71	6.08	23.25	10.78	12.88	13.81	1.19	3.11	1.05	2.19	3.3	5.64	2.45	5.29	10.49	24.74	18.39	26.63
15413	chr12	108403596	108404596	-6537	Eml1	4.77	20.92	-2.53	-3.71	4.77	8.09	5.01	7.91	20.92	4.79	5.37	4.14	10.7	6.22	7.36	5.47	1.1	8.46	3.68	11.65	8.39	24.74	18.39	19.62
64108	chr9	35421095	35422095	-30481	Cdon	139.49	111.52	-0.04	-0.05	139.49	57.96	36.25	54.62	111.52	146.11	136.32	136.03	79.68	34.23	59.96	37.22	36.29	35.25	57.64	30.7	75.53	111.65	117.11	105.8
20690	chr14	68124231	68125231	273	Nefm	23.43	28.01	-0.58	-0.63	23.43	16.2	15.72	20.76	28.01	20.36	30.59	19.33	21.41	12.45	14.73	13.14	14.29	19.74	15.94	19.06	27.27	21.39	32.5	30.13
1602	chr1	67681861	67682861	559334	Cps1	4.76	9.38	-1.39	-0.88	4.76	3.69	2.3	2.11	9.38	8.38	1.07	4.83	4.76	1.04	5.26	3.28	2.2	1.41	0	2.12	4.2	10.7	10.42	7.01
4226	chr1	170867303	170868303	-32	Atf6	35.98	32.17	-0.2	-0.18	35.98	27.77	22.14	13.28	32.17	32.33	30.05	45.57	40.44	18.67	24.19	20.8	13.19	32.43	13.49	11.65	14.69	20.06	43.53	32.93
67547	chrX	99191221	99192221	55660	Efnb1	46.86	14.34	1.36	-2.68	46.86	16.78	13.85	11.71	14.34	46.71	48.3	45.57	19.03	17.63	13.67	9.85	17.59	14.1	9.81	14.82	10.49	18.05	11.65	13.31
62759	chr8	114452458	114453458	13306	Wwox	12.55	11.71	-0.22	-0.11	12.55	11.72	10.55	7.2	11.71	15.57	14.49	7.6	14.27	10.37	10.52	12.04	5.5	14.1	3.68	9.53	8.39	8.69	11.04	15.41
42482	chr3	116968221	116969221	231	Palmd	37.49	14.05	1.06	-1.44	37.49	14.1	13.63	20.13	14.05	32.33	35.96	44.19	21.41	9.33	11.57	17.51	12.1	11.28	24.53	21.18	14.69	18.05	17.78	6.31
18356	chr13	99162776	99163776	-21547	Zfp366	17.63	5.5	1.24	-1.04	17.63	12.31	9.66	6.96	5.5	14.37	15.03	23.48	11.89	14.52	10.52	7.66	4.4	16.92	6.13	6.35	8.39	6.69	4.91	4.9
103	chr1	9629853	9630853	739	2610203C22Rik	15.98	28.76	-1.17	-1.66	15.98	9.36	9.67	11.3	28.76	9.58	15.56	22.79	7.14	7.26	13.67	9.85	12.1	7.05	8.59	14.82	10.49	27.41	39.24	19.62
8228	chr10	111050224	111051224	-40658	Zdhhc17	3.75	13.7	-2.27	-2.2	3.75	3.68	3.77	4.38	13.7	1.2	5.9	4.14	4.76	3.11	3.16	2.19	7.7	1.41	3.68	1.06	8.39	14.04	16.55	10.51
52141	chr6	4988216	4989216	85396	Ppp1r9a	21.82	8.4	1.05	-0.9	21.82	41.88	28.16	6.31	8.4	10.78	23.61	31.07	53.52	32.15	39.97	25.18	29.69	29.61	7.36	5.29	6.29	9.36	11.65	4.2
40992	chr3	65088039	65089039	-20475	Kcnab1	19.6	9.74	0.63	-0.44	19.6	5.87	8.15	6.31	9.74	22.75	9.12	26.93	7.14	3.11	7.36	8.76	4.4	11.28	7.36	5.29	6.29	13.37	6.74	9.11
55602	chr6	136962675	136963675	8652	Pde6h	27.15	6.57	1.66	-2.09	27.15	5.89	10.03	5.38	6.57	37.13	18.78	25.55	8.32	7.26	2.1	12.04	11	7.05	2.45	7.41	6.29	8.69	6.13	4.9
64355	chr9	44093832	44094832	-7438	Mfrp	12.66	12.59	-0.34	-0.19	12.66	6.64	7.47	11.98	12.59	8.38	17.17	12.43	9.51	7.26	3.16	7.66	7.7	7.05	15.94	7.41	12.59	14.04	10.42	13.31
53637	chr6	65564301	65565301	-25597	Tnip3	11.32	4.95	0.84	-0.45	11.32	4.39	6.58	6.72	4.95	9.58	16.1	8.29	4.76	1.04	7.36	4.38	5.5	9.87	8.59	5.29	6.29	4.68	2.45	7.71
36698	chr2	92914626	92915626	25	Syt13	15.39	10.51	0.2	-0.1	15.39	11.82	10.34	16.24	10.51	19.16	11.81	15.19	8.32	13.48	13.67	10.95	8.8	11.28	9.81	11.65	27.27	7.35	7.36	16.82
4528	chr1	180386932	180387932	-56883	Gm5069	81.5	87.91	-0.45	-0.88	81.5	44.38	36.88	49.69	87.91	108.98	78.89	56.62	63.03	24.89	45.23	33.93	42.88	33.84	41.7	40.23	67.13	68.86	107.3	87.58
26861	chr16	90676691	90677691	50180	Mis18a	45.11	13.28	1.42	-2.77	45.11	26.64	31.34	46.5	13.28	47.9	46.69	40.74	39.25	24.89	15.78	31.74	34.09	28.2	55.19	42.35	41.96	12.7	15.94	11.21
52135	chr6	4909812	4910812	6992	Ppp1r9a	63.54	18.71	1.37	-3.54	63.54	27.85	31.02	25.49	18.71	64.67	47.23	78.72	42.81	19.71	21.04	31.74	27.49	33.84	26.98	22.23	27.27	18.72	17.78	19.62
[truncated: 66,433 more rows]

## Sheet: 1-2 NPC vs NFC up
peakID	chr	start	end	toTSS	gene	mean_NPC	mean_NFC	log2FC	log10padj	mean_NPC	mean_No-C	mean_Lo-C	mean_Hi-C	mean_NFC	NPC_r1	NPC_r2	NPC_r3	No-C_r1	No-C_r2	No-C_r3	Lo-C_r1	Lo-C_r2	Lo-C_r3	Hi-C_r1	Hi-C_r2	Hi-C_r3	NFC_r1	NFC_r2	NFC_r3
956	chr1	43555205	43556205	109954	Nck2	147.64	23.87	2.26	-14.22	147.64	66.28	82.47	31.65	23.87	177.24	123.44	142.25	105.85	43.56	49.44	87.57	78.07	81.77	30.66	32.82	31.47	24.74	25.14	21.72
13890	chr12	53969270	53970270	234104	Egln3	89.79	10.56	2.71	-11.35	89.79	21.95	25.9	16.91	10.56	92.21	85.33	91.84	26.16	19.71	19.99	33.93	19.79	23.97	15.94	18	16.78	11.37	9.81	10.51
57043	chr7	49088492	49089492	73166	9130015G15Rik	99.8	16.71	2.19	-10.16	99.8	16.84	33.79	27.69	16.71	110.18	89.09	100.13	20.22	13.48	16.83	38.31	26.39	36.66	35.57	32.82	14.69	16.05	16.55	17.52
17953	chr13	84022978	84023978	41296	Gm17750	110.13	20.89	2.03	-10.07	110.13	49.22	39.08	21.08	20.89	119.76	89.09	121.53	80.87	36.3	30.5	36.12	47.28	33.84	22.08	26.47	14.69	19.39	25.75	17.52
46613	chr4	110125133	110126133	147608	Dmrta2	104.78	18.06	2.18	-9.93	104.78	88.42	97.79	47.95	18.06	107.78	76.74	129.82	136.77	63.27	65.22	95.23	102.26	95.87	77.27	54	12.59	15.38	22.69	16.12
21082	chr14	80002824	80003824	3022	Olfm4	90.31	11.32	2.65	-9.86	90.31	33.77	40.9	30.56	11.32	105.39	58.5	107.03	51.14	21.78	28.4	47.07	41.78	33.84	29.44	37.06	25.18	15.38	7.36	11.21
45078	chr4	55141648	55142648	194203	Zfp462	90.95	13.19	2.44	-9.76	90.95	67.97	71.17	39.75	13.19	104.19	69.23	99.44	104.66	47.71	51.54	54.73	86.87	71.9	30.66	50.82	37.76	13.37	17.78	8.41
30712	chr18	38881849	38882849	-10107	Gm5820	105.77	19.55	2.06	-9.72	105.77	68.02	76.49	56.82	19.55	120.96	81.04	115.32	89.2	60.15	54.7	62.4	82.47	84.59	57.64	62.47	50.35	18.72	19.62	20.32
5259	chr10	8955428	8956428	-69858	Sash1	112.97	20.66	2.07	-9.68	112.97	10.63	20.11	22.53	20.66	143.71	82.65	112.56	13.08	8.3	10.52	18.61	21.99	19.74	30.66	22.23	14.69	18.72	25.75	17.52
60715	chr8	40239446	40240446	47007	Fgf20	94.4	14.43	2.34	-9.4	94.4	29.58	24.29	4.51	14.43	111.38	60.64	111.17	42.81	24.89	21.04	24.08	21.99	26.79	6.13	5.29	2.1	14.04	15.94	13.31
7472	chr10	85616996	85617996	19085	Btbd11	101.71	18.35	2.08	-9.39	101.71	50.68	42.15	12.54	18.35	107.78	79.96	117.39	73.73	41.49	36.81	33.93	41.78	50.75	4.91	20.12	12.59	20.72	14.72	19.62
14108	chr12	67326040	67327040	-103991	Mdga2	92.84	15.94	2.17	-9.13	92.84	38.31	51.82	31.31	15.94	95.81	75.67	107.03	44	41.49	29.45	53.64	53.88	47.93	38.02	34.94	20.98	12.7	14.1	21.02
35192	chr2	34982857	34983857	-21585	Traf1	107.99	19.32	2.09	-9.09	107.99	47.28	46.08	13.63	19.32	142.51	75.13	106.34	66.6	35.26	39.97	38.31	50.58	49.34	13.49	14.82	12.59	18.72	19.62	19.62
1477	chr1	63552708	63553708	107317	Adam23	90.54	14.16	2.3	-9.02	90.54	38.96	30.3	21.75	14.16	116.17	71.91	83.55	59.46	30.08	27.35	24.08	32.99	33.84	20.85	36	8.39	14.71	16.55	11.21
54262	chr6	90620695	90621695	1949	Slc41a3	91.18	15.53	2.2	-8.98	91.18	47.42	51.3	28.74	15.53	104.19	69.23	100.13	70.17	34.23	37.87	48.16	54.98	50.75	42.93	28.59	14.69	11.37	18.39	16.82
55501	chr6	134526644	134527644	39769	Lrp6	95.21	15.8	2.21	-8.98	95.21	23.7	29.57	21.49	15.8	114.97	67.08	103.58	34.49	14.52	22.09	26.27	28.59	33.84	15.94	29.65	18.88	10.7	17.78	18.92
29465	chr17	83538974	83539974	-25141	Cox7a2l	110.42	18.9	2.19	-8.85	110.42	31.24	32.7	12.48	18.9	152.09	63.86	115.32	48.76	19.71	25.24	28.46	32.99	36.66	11.04	18	8.39	17.38	19.01	20.32
42763	chr3	127241955	127242955	81150	LOC100862268	74.22	9.87	2.54	-8.76	74.22	9.43	20.06	5.85	9.87	70.66	71.91	80.1	17.84	4.15	6.31	17.51	18.69	23.97	4.91	6.35	6.29	12.7	9.2	7.71
28258	chr17	43557240	43558240	-10711	Pla2g7	91.83	16.6	2.1	-8.71	91.83	39.14	51.15	30.69	16.6	97	83.19	95.29	64.22	31.11	22.09	43.79	56.08	53.57	31.89	43.41	16.78	20.72	17.17	11.91
55661	chr6	138376523	138377523	44491	Lmo3	82.22	13.4	2.26	-8.61	82.22	35.29	43.67	34.28	13.4	77.84	68.69	100.13	63.03	19.71	23.14	47.07	47.28	36.66	41.7	33.88	27.27	12.7	13.49	14.01
23987	chr15	87692854	87693854	68124	Fam19a5	73.36	9.97	2.51	-8.5	73.36	10.08	14.47	17.09	9.97	82.63	64.94	72.5	8.32	12.45	9.47	14.23	16.49	12.69	19.62	19.06	12.59	12.03	7.36	10.51
55975	chr6	147458382	147459382	-16989	Ccdc91	86.9	15.32	2.17	-8.5	86.9	39.55	42.89	40.53	15.32	95.81	70.3	94.6	57.08	34.23	27.35	41.6	46.18	40.88	33.11	40.23	48.25	13.37	12.26	20.32
21162	chr14	86619382	86620382	373912	4930529K09Rik	75.06	7.85	2.85	-8.44	75.06	19.42	22.4	22.02	7.85	91.02	45.08	89.08	23.79	16.59	17.88	28.46	17.59	21.15	26.98	30.7	8.39	4.01	5.52	14.01
48568	chr5	21553446	21554446	10419	Lrrc17	92.98	17.15	2.05	-8.38	92.98	45.23	42.98	29.43	17.15	97	73.52	108.41	67.79	34.23	33.66	47.07	39.58	42.29	28.21	32.82	27.27	22.73	14.72	14.01
46402	chr4	103896508	103897508	-470530	Dab1	93.16	17.22	2.06	-8.34	93.16	22.89	46.43	27.56	17.22	108.98	67.62	102.89	32.11	18.67	17.88	48.16	41.78	49.34	33.11	30.7	18.88	18.72	19.62	13.31
34123	chr19	59917409	59918409	25455	Rab11fip2	65.53	7.07	2.79	-8.34	65.53	9.63	15.77	16.43	7.07	68.26	50.98	77.34	14.27	8.3	6.31	18.61	13.19	15.51	13.49	12.71	23.08	8.69	5.52	7.01
5682	chr10	23181429	23182429	167961	Eya4	84.61	14.74	2.16	-8.26	84.61	33.5	27.58	8.67	14.74	85.03	78.35	90.46	44	21.78	34.71	28.46	27.49	26.79	4.91	14.82	6.29	20.06	12.26	11.91
5085	chr10	3829198	3830198	-42969	Plekhg1	78.69	11.76	2.42	-8.24	78.69	21	22.94	14.46	11.76	69.46	59.57	107.03	20.22	24.89	17.88	15.33	25.29	28.2	8.59	18	16.78	13.37	13.49	8.41
55620	chr6	137294744	137295744	42945	Ptpro	85.99	14.33	2.21	-8.2	85.99	19.62	25.97	12.23	14.33	104.19	58.5	95.29	28.54	13.48	16.83	20.8	27.49	29.61	13.49	14.82	8.39	14.71	12.88	15.41
44618	chr4	35401766	35402766	-176386	3110043O21Rik	82.72	10.52	2.62	-8.2	82.72	25.13	29.15	12.23	10.52	113.77	41.86	92.53	35.68	19.71	19.99	26.27	32.99	28.2	13.49	14.82	8.39	12.03	10.42	9.11
4327	chr1	172614514	172615514	-12463	Fcrl6	84.57	14.38	2.19	-8.12	84.57	31.93	38.39	18.85	14.38	100.6	58.5	94.6	48.76	20.74	26.3	33.93	41.78	39.47	19.62	22.23	14.69	13.37	17.17	12.61
36467	chr2	81336730	81337730	697966	Nup35	86.5	13.74	2.28	-8.11	86.5	19.55	21.42	7.33	13.74	89.82	63.33	106.34	35.68	11.41	11.57	18.61	23.09	22.56	6.13	11.65	4.2	20.72	13.49	7.01
9068	chr11	7226799	7227799	-13376	Igfbp3	64.25	7.02	2.82	-8.1	64.25	35.08	36.51	16.37	7.02	68.26	45.08	79.41	58.27	25.93	21.04	33.93	31.89	43.7	19.62	12.71	16.78	8.02	6.74	6.31
6064	chr10	38883683	38884683	-62404	Rfpl4b	81.35	12.61	2.31	-8.1	81.35	61.87	45.8	26.43	12.61	71.86	61.72	110.48	99.9	38.37	47.33	48.16	38.49	50.75	24.53	23.29	31.47	14.71	9.81	13.31
37845	chr2	132622857	132623857	25161	AU019990	71.32	9.27	2.56	-8.04	71.32	14.75	18.49	20.25	9.27	91.02	50.45	72.5	20.22	10.37	13.67	19.7	23.09	12.69	19.62	24.35	16.78	8.02	8.58	11.21
51851	chr5	146205240	146206240	15161	Rnf6	99.11	18.7	2.03	-8.01	99.11	49.53	68.79	37.63	18.7	131.73	65.47	100.13	79.68	35.26	33.66	63.49	68.17	74.72	45.38	40.23	27.27	19.39	17.78	18.92
43117	chr3	137288137	137289137	-52441	Emcn	83.46	15.42	2.05	-7.99	83.46	48.24	52.49	37.78	15.42	86.23	72.99	91.15	82.06	31.11	31.56	54.73	50.58	52.16	41.7	33.88	37.76	14.71	14.72	16.82
17634	chr13	70876759	70877759	-5689	8030423J24Rik	78.93	12.84	2.23	-7.98	78.93	15.24	12.17	7.77	12.84	86.23	60.11	90.46	23.79	10.37	11.57	14.23	11	11.28	8.59	4.24	10.49	9.36	16.55	12.61
34450	chr2	11224665	11225665	52783	Prkcq	80.98	13.04	2.27	-7.9	80.98	43.61	40.33	29.51	13.04	80.24	61.18	101.51	63.03	40.45	27.35	33.93	46.18	40.88	36.79	37.06	14.69	17.38	14.72	7.01
40928	chr3	62440118	62441118	66370	Dhx36	98.79	18.7	2.02	-7.79	98.79	17.58	22.71	10.94	18.7	114.97	58.5	122.91	29.73	9.33	13.67	33.93	18.69	15.51	15.94	10.59	6.29	19.39	17.78	18.92
7819	chr10	96398437	96399437	172730	4930459C07Rik	80.79	14.72	2.09	-7.77	80.79	20.79	20.69	19.96	14.72	80.24	65.47	96.67	40.44	11.41	10.52	17.51	21.99	22.56	28.21	21.18	10.49	12.7	15.33	16.12
62686	chr8	111901745	111902745	7954	Chst5	73.56	10.65	2.43	-7.76	73.56	20.66	28.37	27.17	10.65	74.25	69.77	76.65	28.54	15.56	17.88	29.56	32.99	22.56	33.11	16.94	31.47	4.01	10.42	17.52
16452	chr13	29284812	29285812	269057	A330102I10Rik	87.07	16.63	2.02	-7.73	87.07	36.36	61.26	44.37	16.63	88.62	67.62	104.96	55.9	33.19	19.99	70.06	51.68	62.03	61.32	48.7	23.08	18.72	12.26	18.92
60232	chr8	24086959	24087959	351487	Tcim	68.99	10.73	2.38	-7.66	68.99	43.53	30.29	13.33	10.73	76.65	58.5	71.81	67.79	22.82	39.97	30.65	26.39	33.84	7.36	13.76	18.88	13.37	10.42	8.41
64303	chr9	42702990	42703990	-231232	Tbcel	65.47	9.44	2.46	-7.62	65.47	63.06	62.41	50.93	9.44	71.86	61.72	62.84	86.82	49.78	52.59	72.25	57.18	57.8	60.1	42.35	50.35	6.69	10.42	11.21
21174	chr14	86772180	86773180	368544	Diaph3	80.26	14.46	2.12	-7.58	80.26	24.88	17.76	11.41	14.46	80.24	63.86	96.67	38.06	16.59	19.99	15.33	15.39	22.56	11.04	12.71	10.49	19.39	13.49	10.51
65610	chr9	86996517	86997517	-18520	Ripply2	79.93	15.35	2.02	-7.57	79.93	11.62	24.87	40.53	15.35	76.65	74.06	89.08	11.89	11.41	11.57	25.18	29.69	19.74	40.47	37.06	44.06	14.71	15.94	15.41
16427	chr13	28697566	28698566	12807	Mir6368	78.43	14.04	2.09	-7.56	78.43	33.56	29.5	17.03	14.04	87.42	62.25	85.62	54.71	21.78	24.19	36.12	24.19	28.2	18.4	18	14.69	12.7	14.72	14.71
710	chr1	36478195	36479195	7098	Cnnm4	69.04	10.18	2.43	-7.56	69.04	20.36	32.17	32.02	10.18	85.03	60.64	61.46	29.73	15.56	15.78	29.56	27.49	39.47	30.66	40.23	25.18	8.02	14.1	8.41
62334	chr8	102907229	102908229	-122618	Cdh11	68.36	9.95	2.46	-7.54	68.36	65.49	58.93	16.91	9.95	75.45	48.84	80.79	103.47	44.6	48.39	50.35	71.47	54.98	23.3	16.94	10.49	7.35	14.1	8.41
52182	chr6	5749928	5750928	24789	Dync1i1	67.89	9.09	2.5	-7.44	67.89	11.96	9.87	3.63	9.09	82.63	45.08	75.96	11.89	13.48	10.52	10.95	8.8	9.87	2.45	4.24	4.2	6.69	12.88	7.71
41172	chr3	69993326	69994326	-13787	Otol1	76.19	12.75	2.22	-7.42	76.19	24.8	37.03	31.08	12.75	77.84	54.74	95.98	35.68	14.52	24.19	42.69	37.39	31.02	33.11	34.94	25.18	9.36	18.39	10.51
4154	chr1	168743076	168744076	252933	Mir6348	65.39	9.3	2.44	-7.28	65.39	14.72	29.87	27.12	9.3	73.05	49.91	73.2	28.54	11.41	4.21	33.93	27.49	28.2	30.66	36	14.69	6.02	8.58	13.31
39397	chr2	178967415	178968415	-447021	4930591A17Rik	84.37	15.01	2.11	-7.2	84.37	61.35	62.2	28.22	15.01	97	55.28	100.82	86.82	42.52	54.7	59.11	52.78	74.72	24.53	37.06	23.08	21.39	11.04	12.61
5892	chr10	29921439	29922439	278601	Cenpw	70.8	12.14	2.19	-7.2	70.8	14.08	23.34	18.52	12.14	76.65	56.35	79.41	21.41	14.52	6.31	26.27	19.79	23.97	19.62	29.65	6.29	11.37	11.04	14.01
57541	chr7	71405972	71406972	-503223	4930441H08Rik	61.15	7.8	2.58	-7.2	61.15	32.96	42.67	20.01	7.8	74.25	52.59	56.62	48.76	26.97	23.14	40.5	39.58	47.93	22.08	19.06	18.88	8.69	4.91	9.81
44213	chr4	17985836	17986836	132878	Mmp16	79.09	14.37	2.09	-7.13	79.09	48.2	33.75	14.09	14.37	85.03	54.2	98.05	71.36	26.97	46.28	28.46	41.78	31.02	15.94	11.65	14.69	16.05	11.65	15.41
9845	chr11	35593353	35594353	-22963	Mir218-2	82.82	15.57	2.04	-7.11	82.82	28.11	26.22	11.88	15.57	110.18	59.57	78.72	40.44	20.74	23.14	30.65	29.69	18.33	13.49	11.65	10.49	14.04	16.55	16.12
29697	chr17	89319292	89320292	-435	4933400B14Rik	57.1	6.76	2.66	-7.11	57.1	7.1	8.35	23.93	6.76	57.48	46.15	67.67	11.89	3.11	6.31	15.33	5.5	4.23	30.66	24.35	16.78	6.69	7.97	5.61
12763	chr12	4783507	4784507	14712	Pfn4	72.73	13.39	2.09	-7.1	72.73	33.97	45.55	28.16	13.39	77.84	64.4	75.96	55.9	19.71	26.3	43.79	50.58	42.29	23.3	36	25.18	11.37	14.1	14.71
49480	chr5	58258124	58259124	194374	4930459L07Rik	60.47	8.38	2.55	-7.1	60.47	12.21	8.56	5.91	8.38	74.25	47.76	59.39	26.16	4.15	6.31	13.14	5.5	7.05	6.13	7.41	4.2	9.36	7.36	8.41
49978	chr5	77762252	77763252	297264	1700017L05Rik	77.31	12.99	2.2	-7.09	77.31	35.01	29.09	16.72	12.99	83.83	49.37	98.74	55.9	22.82	26.3	29.56	25.29	32.43	19.62	13.76	16.78	11.37	17.78	9.81
22044	chr15	6619460	6620460	34343	LOC102632231	77.15	14.01	2.1	-7.07	77.15	20.6	34.84	17.86	14.01	94.61	52.59	84.24	35.68	12.45	13.67	28.46	35.19	40.88	20.85	22.23	10.49	12.7	15.33	14.01
67987	chrX	141884044	141885044	-159327	Irs4	77.45	14.65	2.04	-7.05	77.45	20.63	29.46	17.51	14.65	82.63	70.3	79.41	36.87	15.56	9.47	29.56	26.39	32.43	20.85	21.18	10.49	18.72	9.81	15.41
61604	chr8	73052087	73053087	36075	Mir28b	75.73	13.46	2.14	-7.05	75.73	41.45	33.12	7.25	13.46	68.26	67.08	91.84	68.98	25.93	29.45	31.74	35.19	32.43	12.26	5.29	4.2	7.35	14.1	18.92
49142	chr5	44217065	44218065	9041	Tapt1	76.64	14.58	2.02	-6.97	76.64	35.4	40.7	20.55	14.58	79.04	59.03	91.84	48.76	28	29.45	43.79	47.28	31.02	25.76	23.29	12.59	14.04	12.88	16.82
16105	chr13	17858999	17859999	-54402	Cdk13	88.87	16.65	2.07	-6.94	88.87	27.37	28.42	12.11	16.65	89.82	64.94	111.86	39.25	19.71	23.14	20.8	26.39	38.07	18.4	9.53	8.39	17.38	7.36	25.22
18611	chr13	107513206	107514206	43884	AI197445	75.65	12.52	2.25	-6.94	75.65	24.48	42.94	32.3	12.52	77.84	72.45	76.65	28.54	23.85	21.04	39.41	42.88	46.52	29.44	33.88	33.57	22.06	9.2	6.31
54612	chr6	101243163	101244163	134234	Pdzrn3	64.63	10.25	2.28	-6.93	64.63	9.98	34.53	40.88	10.25	65.87	52.06	75.96	14.27	7.26	8.41	37.22	39.58	26.79	40.47	36	46.16	8.69	12.26	9.81
18047	chr13	90425114	90426114	335947	Tmem167	92.23	17.26	2.06	-6.92	92.23	42.41	68.17	53.05	17.26	125.75	56.35	94.6	58.27	33.19	35.76	61.3	67.07	76.13	45.38	52.94	60.84	23.4	12.26	16.12
57149	chr7	52252228	52253228	-237012	1700015G11Rik	75.37	14.78	2.01	-6.9	75.37	63.74	51.1	13.95	14.78	83.83	69.77	72.5	95.14	48.75	47.33	45.98	59.38	47.93	12.26	23.29	6.29	14.04	18.39	11.91
32014	chr18	81090629	81091629	-104551	Sall3	67.63	11.57	2.21	-6.88	67.63	13.19	14.94	13.57	11.57	70.66	54.2	78.03	16.65	14.52	8.41	12.04	18.69	14.1	12.26	13.76	14.69	14.04	12.26	8.41
3388	chr1	143096604	143097604	-543593	B3galt2	78.27	14.51	2.08	-6.84	78.27	12.97	25.74	14.76	14.51	73.05	64.4	97.36	19.03	8.3	11.57	30.65	19.79	26.79	14.72	19.06	10.49	10.7	10.42	22.42
66896	chrX	14279186	14280186	68538	H2al1n	69.16	11.15	2.29	-6.84	69.16	21.66	15.15	3.34	11.15	71.86	52.06	83.55	35.68	11.41	17.88	12.04	16.49	16.92	3.68	4.24	2.1	11.37	17.17	4.9
56503	chr7	28196152	28197152	16336	Dyrk1b	67.27	10.3	2.34	-6.82	67.27	22.85	32.55	15.46	10.3	92.21	48.84	60.77	30.92	16.59	21.04	22.99	35.19	39.47	14.72	19.06	12.59	9.36	11.04	10.51
5196	chr10	7292980	7293980	-81243	Cnksr3	69.62	12.96	2.09	-6.8	69.62	32.52	39.12	22.98	12.96	70.66	57.42	80.79	54.71	18.67	24.19	47.07	40.68	29.61	24.53	38.12	6.29	11.37	13.49	14.01
41330	chr3	80119752	80120752	234322	Fam198b	64.11	9.32	2.4	-6.8	64.11	19.06	16.46	6.33	9.32	73.05	44.01	75.27	32.11	12.45	12.62	9.85	19.79	19.74	7.36	9.53	2.1	12.03	6.13	9.81
37155	chr2	112360289	112361289	7238	Emc4	72.82	13.94	2.05	-6.8	72.82	39.15	34.48	17.23	13.94	73.05	66.01	79.41	54.71	26.97	35.76	33.93	38.49	31.02	22.08	25.41	4.2	17.38	10.42	14.01
33411	chr19	38232183	38233183	-8551	Fra10ac1	68.82	12.23	2.16	-6.79	68.82	17.83	27.58	65.9	12.23	65.87	61.18	79.41	27.35	11.41	14.73	26.27	29.69	26.79	57.64	60.35	79.72	7.35	15.33	14.01
49479	chr5	58257456	58258456	195042	4930459L07Rik	58.36	8.1	2.5	-6.78	58.36	11.41	7.73	3.62	8.1	69.46	53.13	52.48	15.46	10.37	8.41	7.66	9.9	5.64	2.45	2.12	6.29	6.69	9.2	8.41
68169	chrX	157334257	157335257	80529	Phex	69.05	10.35	2.36	-6.77	69.05	27.92	24.97	16.65	10.35	87.42	42.4	77.34	45.19	23.85	14.73	17.51	26.39	31.02	18.4	8.47	23.08	8.02	15.33	7.71
42807	chr3	128180863	128181863	50242	D030025E07Rik	71.87	12.42	2.17	-6.77	71.87	8.93	14.94	10.13	12.42	80.24	50.45	84.93	14.27	7.26	5.26	18.61	21.99	4.23	13.49	12.71	4.2	10.03	10.42	16.82
25634	chr16	40696959	40697959	713095	Lsamp	60.59	9.2	2.34	-6.75	60.59	25.23	22.58	6.27	9.2	58.68	54.74	68.36	38.06	17.63	19.99	18.61	30.79	18.33	6.13	8.47	4.2	10.7	9.2	7.71
30015	chr18	12784972	12785972	34435	Osbpl1a	73.68	13.78	2.06	-6.74	73.68	17.11	19.75	12.47	13.78	87.42	59.03	74.58	27.35	14.52	9.47	16.42	23.09	19.74	11.04	15.88	10.49	12.7	10.42	18.22
36759	chr2	94498161	94499161	-60475	Api5	65.58	10.9	2.22	-6.74	65.58	43.23	26.95	10.25	10.9	58.68	62.79	75.27	70.17	30.08	29.45	26.27	26.39	28.2	8.59	13.76	8.39	6.69	14.1	11.91
37947	chr2	135757184	135758184	-7154	Plcb4	52.74	6.19	2.77	-6.69	52.74	39.51	28.94	27.43	6.19	50.3	45.08	62.84	55.9	34.23	28.4	31.74	29.69	25.38	23.3	25.41	33.57	3.34	6.13	9.11
47571	chr4	140549704	140550704	98552	Arhgef10l	52.56	5.87	2.86	-6.69	52.56	15.14	17.92	10.41	5.87	68.26	44.54	44.88	21.41	13.48	10.52	15.33	18.69	19.74	12.26	10.59	8.39	3.34	7.97	6.31
40428	chr3	41366194	41367194	126505	Platr4	63.44	10.53	2.25	-6.68	63.44	13.05	17.34	16.45	10.53	73.05	50.98	66.29	13.08	15.56	10.52	20.8	14.29	16.92	20.85	20.12	8.39	11.37	10.42	9.81
9765	chr11	33607498	33608498	-29041	Gabrp	74.19	13.95	2.03	-6.68	74.19	25.15	14.84	9.54	13.95	87.42	53.67	81.48	35.68	13.48	26.3	8.76	13.19	22.56	8.59	11.65	8.39	14.71	15.94	11.21
50020	chr5	81248338	81249338	227245	Adgrl3	56.83	6.82	2.65	-6.67	56.83	9.12	7.2	6.96	6.82	71.86	41.32	57.31	10.7	11.41	5.26	9.85	3.3	8.46	6.13	8.47	6.29	10.03	5.52	4.9
31054	chr18	52831560	52832560	63916	Sncaip	72.1	13.79	2.03	-6.64	72.1	49.56	49.78	7.56	13.79	82.63	61.18	72.5	79.68	30.08	38.92	42.69	51.68	54.98	11.04	11.65	0	17.38	13.49	10.51
19871	chr14	36288583	36289583	194118	4930474N05Rik	70.19	11.66	2.22	-6.62	70.19	23.42	19.17	4.81	11.66	86.23	45.62	78.72	36.87	18.67	14.73	18.61	21.99	16.92	4.91	9.53	0	10.03	16.55	8.41
65557	chr9	85498935	85499935	-172285	Fam46a	61.88	8.83	2.41	-6.62	61.88	17.56	28.26	11.17	8.83	70.66	39.71	75.27	29.73	13.48	9.47	32.84	30.79	21.15	20.85	8.47	4.2	8.02	7.97	10.51
25960	chr16	51475442	51476442	511345	Gm29686	63.96	10.32	2.25	-6.6	63.96	18.96	26.85	16.04	10.32	63.47	48.3	80.1	29.73	14.52	12.62	21.89	21.99	36.66	12.26	21.18	14.69	10.03	10.42	10.51
49318	chr5	51567894	51568894	-669	Ppargc1a	69.67	11.71	2.2	-6.6	69.67	28.9	13.06	8.43	11.71	83.83	45.08	80.1	42.81	19.71	24.19	8.76	12.1	18.33	7.36	9.53	8.39	8.69	11.04	15.41
44055	chr4	11673834	11674834	-30113	Gem	78.11	15.06	2.04	-6.58	78.11	15.24	25.86	20.37	15.06	92.21	50.98	91.15	23.79	11.41	10.52	30.65	28.59	18.33	29.44	21.18	10.49	11.37	13.49	20.32
36819	chr2	101372708	101373708	-251540	Rag2	66.84	10.24	2.32	-6.57	66.84	6.5	18.71	13.34	10.24	64.67	53.67	82.17	5.95	8.3	5.26	8.76	21.99	25.38	7.36	15.88	16.78	16.71	9.81	4.2
46559	chr4	108629176	108630176	9720	Cc2d1b	65.99	11.6	2.14	-6.56	65.99	20.47	24.03	34.89	11.6	74.25	62.25	61.46	23.79	17.63	19.99	20.8	23.09	28.2	46.61	39.18	18.88	10.7	12.88	11.21
31474	chr18	65550382	65551382	-29348	Zfp532	46.35	4.31	3.08	-6.54	46.35	29.34	32.65	11.94	4.31	46.71	48.84	43.5	45.19	20.74	22.09	26.27	30.79	40.88	7.36	13.76	14.69	4.01	6.13	2.8
29111	chr17	71810745	71811745	29298	Clip4	70.16	13.41	2.03	-6.54	70.16	32.61	33.64	8.54	13.41	76.65	55.81	78.03	48.76	25.93	23.14	26.27	35.19	39.47	9.81	7.41	8.39	16.05	12.26	11.91
40429	chr3	41372859	41373859	119840	Platr4	68.79	10.73	2.3	-6.52	68.79	53.59	48.15	34.27	10.73	79.04	42.4	84.93	85.63	41.49	33.66	51.45	45.08	47.93	34.34	30.7	37.76	13.37	5.52	13.31
56987	chr7	46115876	46116876	-15612	Kcnj11	63.5	9.94	2.3	-6.5	63.5	15.47	27.16	26.27	9.94	81.44	48.3	60.77	20.22	7.26	18.93	27.37	23.09	31.02	28.21	25.41	25.18	8.02	9.2	12.61
19279	chr14	14639710	14640710	-62815	Slc4a7	67.58	11.5	2.21	-6.49	67.58	49.54	58.25	31.82	11.5	82.63	48.3	71.81	71.36	41.49	35.76	60.21	63.78	50.75	40.47	48.7	6.29	7.35	11.04	16.12
31346	chr18	61416252	61417252	-16321	Ppargc1b	66.52	12.43	2.11	-6.49	66.52	16.47	24.75	14.21	12.43	71.86	57.96	69.74	28.54	12.45	8.41	30.65	15.39	28.2	11.04	14.82	16.78	15.38	13.49	8.41
57755	chr7	79323749	79324749	50983	Abhd2	60.51	8.62	2.43	-6.49	60.51	19.9	25.29	26.63	8.62	71.86	41.32	68.36	27.35	17.63	14.73	18.61	31.89	25.38	28.21	28.59	23.08	8.69	12.26	4.9
43222	chr3	139985638	139986638	-42111	Mir7j	62.9	10.52	2.23	-6.47	62.9	65.29	49.52	10.59	10.52	68.26	47.23	73.2	98.71	47.71	49.44	49.26	52.78	46.52	15.94	9.53	6.29	12.03	10.42	9.11
33279	chr19	34406314	34407314	68321	Ch25h	51.02	6.38	2.65	-6.47	51.02	37.17	37.76	8.89	6.38	53.89	46.69	52.48	58.27	29.04	24.19	47.07	35.19	31.02	9.81	8.47	8.39	6.69	6.13	6.31
46891	chr4	120259270	120260270	27491	Foxo6	62.13	9.97	2.28	-6.46	62.13	26.35	23.62	18.54	9.97	74.25	56.89	55.24	40.44	20.74	17.88	20.8	27.49	22.56	20.85	15.88	18.88	8.02	8.58	13.31
12866	chr12	9275406	9276406	245909	Ttc32	65.83	11.96	2.13	-6.44	65.83	8.34	21.84	48.88	11.96	75.45	53.67	68.36	8.32	8.3	8.41	22.99	24.19	18.33	60.1	55.06	31.47	13.37	14.1	8.41
25856	chr16	48405725	48406725	6191	Gm5485	64.24	10.51	2.26	-6.43	64.24	21.18	26.91	30.43	10.51	59.88	47.23	85.62	24.97	24.89	13.67	27.37	30.79	22.56	34.34	33.88	23.08	12.7	10.42	8.41
52256	chr6	8419226	8420226	89435	A430035B10Rik	65.62	11.48	2.17	-6.4	65.62	17.29	19.33	9.31	11.48	81.44	47.76	67.67	22.6	13.48	15.78	16.42	17.59	23.97	11.04	10.59	6.29	10.7	10.42	13.31
25661	chr16	41827065	41828065	294223	Lsamp	67.67	11.96	2.14	-6.4	67.67	30.05	43.09	40.51	11.96	71.86	53.13	78.03	45.19	19.71	25.24	44.88	40.68	43.7	39.25	48.7	33.57	6.02	16.55	13.31
61379	chr8	67436209	67437209	-54049	Nat1	71.52	11.28	2.28	-6.39	71.52	40.29	41.9	13.51	11.28	80.24	44.54	89.77	58.27	35.26	27.35	37.22	46.18	42.29	18.4	11.65	10.49	10.7	4.91	18.22
57688	chr7	76321704	76322704	92317	Agbl1	54.74	7.54	2.47	-6.39	54.74	11.51	20.26	14.36	7.54	52.69	44.54	66.98	17.84	9.33	7.36	19.7	14.29	26.79	13.49	23.29	6.29	8.69	5.52	8.41
59181	chr7	129141941	129142941	-114653	Plpp4	56.65	8.96	2.36	-6.39	56.65	11.78	12.28	4.57	8.96	53.89	55.28	60.77	15.46	8.3	11.57	9.85	14.29	12.69	7.36	6.35	0	7.35	10.42	9.11
65901	chr9	98300301	98301301	4231	Nmnat3	67.8	13.15	2.02	-6.39	67.8	34.39	30.3	8.14	13.15	74.25	60.11	69.05	41.62	36.3	25.24	28.46	28.59	33.84	8.59	9.53	6.29	14.04	13.49	11.91
5021	chr1	194482075	194483075	-137254	Plxna2	49.28	5.45	2.76	-6.37	49.28	19.6	25.02	18.86	5.45	44.31	48.3	55.24	28.54	16.59	13.67	32.84	25.29	16.92	20.85	8.47	27.27	4.01	6.74	5.61
16744	chr13	38863688	38864688	96349	Slc35b3	70.81	12.28	2.18	-6.35	70.81	23.2	28.79	14.26	12.28	91.02	41.32	80.1	30.92	16.59	22.09	16.42	31.89	38.07	12.26	9.53	20.98	13.37	12.26	11.21
40154	chr3	32856394	32857394	39268	Usp13	72.6	12.12	2.18	-6.35	72.6	21.36	23.46	11.52	12.12	88.62	45.62	83.55	38.06	18.67	7.36	20.8	24.19	25.38	13.49	10.59	10.49	14.71	5.52	16.12
49654	chr5	66861518	66862518	-106398	Limch1	62.92	10.82	2.19	-6.33	62.92	16.75	24.82	14.1	10.82	68.26	54.2	66.29	26.16	8.3	15.78	22.99	27.49	23.97	8.59	16.94	16.78	13.37	13.49	5.61
54665	chr6	103473017	103474017	-37359	Chl1	55.89	8.21	2.45	-6.31	55.89	9.23	9.71	6.5	8.21	49.1	53.67	64.91	13.08	8.3	6.31	10.95	5.5	12.69	11.04	6.35	2.1	5.35	7.36	11.91
44603	chr4	35094254	35095254	-57301	Ifnk	56.8	8.94	2.31	-6.3	56.8	21.24	26.59	14.99	8.94	62.27	51.52	56.62	24.97	11.41	27.35	25.18	26.39	28.2	19.62	19.06	6.29	8.69	10.42	7.71
28809	chr17	62694837	62695837	185980	Efna5	73.11	13.14	2.12	-6.3	73.11	20.21	21.94	10.73	13.14	69.46	55.28	94.6	34.49	11.41	14.73	22.99	23.09	19.74	11.04	16.94	4.2	7.35	11.04	21.02
58681	chr7	112784961	112785961	26077	Tead1	56.45	8.71	2.35	-6.3	56.45	34.32	24.14	12.05	8.71	64.67	46.69	58	47.57	24.89	30.5	16.42	26.39	29.61	9.81	11.65	14.69	8.69	10.42	7.01
21073	chr14	79872754	79873754	-4078	Gm10845	61.65	9.54	2.3	-6.28	61.65	10.82	16.82	8.79	9.54	73.05	40.79	71.12	17.84	8.3	6.31	16.42	14.29	19.74	14.72	11.65	0	11.37	6.74	10.51
29415	chr17	82432422	82433422	645303	Gm19689	51.57	7.03	2.53	-6.24	51.57	17.39	22.09	22.52	7.03	58.68	45.62	50.41	24.97	11.41	15.78	19.7	19.79	26.79	23.3	23.29	20.98	7.35	6.74	7.01
3911	chr1	161952473	161953473	16175	4930558K02Rik	64.28	11.88	2.06	-6.23	64.28	23.07	37.99	21.02	11.88	70.66	57.96	64.22	36.87	19.71	12.62	25.18	45.08	43.7	28.21	24.35	10.49	12.7	11.04	11.91
49385	chr5	53249160	53250160	-17446	Smim20	70.55	13.21	2.05	-6.21	70.55	14.7	13.69	14.65	13.21	86.23	51.52	73.89	19.03	12.45	12.62	7.66	16.49	16.92	19.62	20.12	4.2	8.02	19.01	12.61
59648	chr7	144102025	144103025	-72995	Shank2	64.19	10.12	2.26	-6.2	64.19	15.82	24.59	14.76	10.12	81.44	43.47	67.67	21.41	17.63	8.41	26.27	16.49	31.02	14.72	21.18	8.39	10.03	14.72	5.61
16204	chr13	21319965	21320965	8262	Gpx6	49.5	5.57	2.76	-6.19	49.5	8.38	6.01	8.37	5.57	58.68	35.96	53.86	9.51	10.37	5.26	4.38	6.6	7.05	6.13	10.59	8.39	8.02	3.07	5.61
37214	chr2	113987762	113988762	-25303	A530058N18Rik	56.3	8.46	2.4	-6.15	56.3	19.06	17.24	12.69	8.46	67.06	44.54	57.31	23.79	18.67	14.73	18.61	17.59	15.51	15.94	9.53	12.59	4.01	12.26	9.11
2796	chr1	121771097	121772097	-203617	Ddx18	69.61	12.79	2.05	-6.14	69.61	48.24	38.21	26.73	12.79	85.03	45.08	78.72	82.06	32.15	30.5	25.18	52.78	36.66	30.66	24.35	25.18	12.7	11.65	14.01
13345	chr12	31366013	31367013	-15042	Dld	46.61	5.17	2.86	-6.13	46.61	9.09	6.64	5.55	5.17	46.71	36.49	56.62	9.51	8.3	9.47	5.47	8.8	5.64	6.13	4.24	6.29	5.35	7.36	2.8
39303	chr2	174020168	174021168	-56383	Stx16	55.7	8.43	2.37	-6.08	55.7	29.06	37.66	21.42	8.43	53.89	43.47	69.74	38.06	21.78	27.35	39.41	34.09	39.47	29.44	20.12	14.69	9.36	6.13	9.81
617	chr1	33657408	33658408	11886	Prim2	66.54	12.93	2.02	-6.08	66.54	36.56	41.54	28.24	12.93	69.46	49.37	80.79	42.81	32.15	34.71	39.41	52.78	32.43	33.11	24.35	27.27	11.37	14.1	13.31
13001	chr12	13444357	13445357	175730	Nbas	51.13	6.7	2.57	-6.08	51.13	29.9	26.54	17.84	6.7	50.3	40.25	62.84	41.62	20.74	27.35	21.89	25.29	32.43	20.85	15.88	16.78	6.69	9.2	4.2
61136	chr8	57092299	57093299	228060	AV026068	60.49	10.3	2.22	-6.05	60.49	15.1	13.53	5.98	10.3	62.27	41.86	77.34	20.22	11.41	13.67	16.42	14.29	9.87	7.36	8.47	2.1	11.37	10.42	9.11
11112	chr11	78373865	78374865	12243	Foxn1	55.22	8.32	2.42	-6.05	55.22	12.07	15.3	16.16	8.32	71.86	41.32	52.48	14.27	11.41	10.52	16.42	15.39	14.1	22.08	18	8.39	7.35	9.2	8.41
12720	chr12	3568341	3569341	-3550	Dtnb	53.67	7.72	2.43	-5.98	53.67	21.44	22.84	12.81	7.72	58.68	38.1	64.22	30.92	17.63	15.78	19.7	31.89	16.92	18.4	11.65	8.39	10.03	6.13	7.01
48242	chr5	5916105	5917105	-167288	Steap1	48.35	5.32	2.74	-5.97	48.35	54.6	49.94	13.11	5.32	45.51	42.93	56.62	76.11	45.63	42.07	43.79	53.88	52.16	9.81	14.82	14.69	6.69	8.58	0.7
52798	chr6	32653876	32654876	-66184	Plxna4	44.29	3.2	3.36	-5.95	44.29	9.68	12.59	6.56	3.2	46.71	24.69	61.46	15.46	6.22	7.36	9.85	11	16.92	4.91	8.47	6.29	0.67	6.13	2.8
40129	chr3	32121436	32122436	219233	Kcnmb2	55.18	7.98	2.36	-5.94	55.18	62.39	55.59	14.5	7.98	46.71	45.62	73.2	85.63	34.23	67.32	45.98	61.58	59.21	9.81	12.71	20.98	6.69	6.74	10.51
25258	chr16	29297329	29298329	80903	Atp13a5	64.88	11.82	2.07	-5.94	64.88	35.49	44.76	23.98	11.82	71.86	50.98	71.81	51.14	29.04	26.3	43.79	43.98	46.52	17.17	25.41	29.37	9.36	8.58	17.52
26779	chr16	87957204	87958204	48433	4930590A17Rik	52.07	7.75	2.4	-5.93	52.07	15.88	18.29	15.75	7.75	51.5	41.86	62.84	22.6	15.56	9.47	13.14	21.99	19.74	20.85	20.12	6.29	8.02	6.13	9.11
40351	chr3	39202318	39203318	315878	Fat4	69.03	13.16	2.02	-5.92	69.03	24.74	19.33	11.07	13.16	81.44	48.3	77.34	34.49	17.63	22.09	18.61	25.29	14.1	18.4	12.71	2.1	15.38	7.97	16.12
18480	chr13	102875242	102876242	115487	1700099I09Rik	70.63	13.2	2.03	-5.92	70.63	23.52	30.44	13.99	13.2	85.03	44.01	82.86	39.25	17.63	13.67	36.12	24.19	31.02	13.49	18	10.49	12.7	17.78	9.11
52569	chr6	23728507	23729507	-73871	Rnf148	73.46	13.41	2.08	-5.89	73.46	61.36	49.75	34.68	13.41	80.24	43.47	96.67	79.68	54.97	49.44	35.03	64.88	49.34	28.21	33.88	41.96	16.05	17.17	7.01
19766	chr14	32428786	32429786	35564	Slc18a3	41.83	4.03	3.14	-5.89	41.83	10.88	14.94	10.48	4.03	43.11	35.42	46.96	10.7	10.37	11.57	13.14	17.59	14.1	13.49	11.65	6.29	3.34	2.45	6.31
51726	chr5	140852355	140853355	-22424	Gna12	61.89	10.35	2.22	-5.87	61.89	23.1	20.84	12.52	10.35	85.03	44.01	56.62	28.54	18.67	22.09	19.7	23.09	19.74	12.26	14.82	10.49	13.37	8.58	9.11
48137	chr4	155968989	155969989	7177	C1qtnf12	60.97	10.44	2.19	-5.86	60.97	32.83	47.9	68.35	10.44	71.86	46.15	64.91	45.19	24.89	28.4	38.31	46.18	59.21	72.36	57.17	75.53	15.38	6.13	9.81
65807	chr9	95079968	95080968	326802	Chst2	58.9	9.67	2.25	-5.85	58.9	10.91	16.03	10.77	9.67	77.84	42.93	55.93	11.89	13.48	7.36	18.61	15.39	14.1	12.26	13.76	6.29	6.69	10.42	11.91
13611	chr12	40546045	40547045	100492	Dock4	65.81	12.21	2.05	-5.85	65.81	23.04	24.75	10.66	12.21	83.83	44.54	69.05	35.68	14.52	18.93	26.27	19.79	28.2	17.17	12.71	2.1	8.69	15.33	12.61
64112	chr9	35473822	35474822	22246	Cdon	57.67	10.28	2.12	-5.83	57.67	20.06	16.66	13.04	10.28	59.88	50.98	62.15	22.6	20.74	16.83	21.89	15.39	12.69	8.59	11.65	18.88	10.7	11.04	9.11
2523	chr1	105067604	105068604	-287903	Gm17634	64.33	11.84	2.09	-5.83	64.33	17.98	18.72	17.16	11.84	71.86	42.4	78.72	22.6	15.56	15.78	9.85	30.79	15.51	20.85	22.23	8.39	8.02	13.49	14.01
20171	chr14	51786770	51787770	-12776	AY358078	63.87	12.13	2.05	-5.82	63.87	24.16	20.9	14.99	12.13	68.26	46.69	76.65	29.73	25.93	16.83	19.7	27.49	15.51	19.62	19.06	6.29	8.02	17.17	11.21
25280	chr16	29826660	29827660	151964	Gm1968	56.68	8.94	2.23	-5.81	56.68	11.95	12.49	14.04	8.94	58.68	45.08	66.29	11.89	15.56	8.41	12.04	19.79	5.64	14.72	12.71	14.69	8.69	5.52	12.61
142	chr1	11006199	11007199	13234	Prex2	42.8	4.59	2.85	-5.79	42.8	8.89	5.44	11.87	4.59	43.11	39.71	45.57	13.08	6.22	7.36	3.28	8.8	4.23	6.13	12.71	16.78	3.34	5.52	4.9
15906	chr13	9192515	9193515	-83510	Dip2c	59.18	10.34	2.14	-5.79	59.18	41.89	46.9	17.05	10.34	59.88	47.23	70.43	63.03	32.15	30.5	48.16	41.78	50.75	25.76	21.18	4.2	14.04	8.58	8.41
8391	chr10	116746400	116747400	17647	4930579P08Rik	60.72	11.17	2.1	-5.76	60.72	14.6	19.38	27.81	11.17	62.27	51.52	68.36	24.97	7.26	11.57	20.8	17.59	19.74	38.02	32.82	12.59	10.03	7.36	16.12
20430	chr14	59677243	59678243	52462	Shisa2	63.84	12.13	2.04	-5.74	63.84	22.69	28.05	13.97	12.13	74.25	46.15	71.12	35.68	14.52	17.88	30.65	25.29	28.2	13.49	9.53	18.88	8.02	12.26	16.12
4557	chr1	181000316	181001316	16753	Ephx1	63.19	11.91	2.03	-5.74	63.19	14.61	13.84	13.16	11.91	75.45	49.91	64.22	16.65	12.45	14.73	17.51	9.9	14.1	11.04	11.65	16.78	9.36	16.55	9.81
20077	chr14	48198607	48199607	391	Gm6498	50.03	7.09	2.47	-5.73	50.03	17.28	20.79	16.58	7.09	62.27	38.1	49.72	22.6	14.52	14.73	25.18	23.09	14.1	15.94	25.41	8.39	6.02	6.13	9.11
8335	chr10	115247811	115248811	3182	Tbc1d15	66.79	10.32	2.31	-5.73	66.79	39.9	42.68	10.05	10.32	94.61	38.1	67.67	73.73	22.82	23.14	30.65	39.58	57.8	4.91	8.47	16.78	17.38	7.97	5.61
57523	chr7	70847666	70848666	-481420	Nr2f2	53.2	8.5	2.26	-5.72	53.2	39.64	41.89	27.1	8.5	58.68	42.93	58	59.46	34.23	25.24	31.74	41.78	52.16	30.66	29.65	20.98	8.69	9.81	7.01
54247	chr6	90340117	90341117	7328	Uroc1	45.02	5.07	2.71	-5.7	45.02	18.98	16.97	19.13	5.07	44.31	37.57	53.17	21.41	16.59	18.93	19.7	14.29	16.92	18.4	20.12	18.88	8.02	3.68	3.5
68241	chrX	161581867	161582867	-134669	Rai2	62.08	11.5	2.08	-5.7	62.08	35.6	41.1	10.89	11.5	58.68	44.01	83.55	45.19	31.11	30.5	43.79	32.99	46.52	7.36	12.71	12.59	11.37	9.81	13.31
67258	chrX	62350226	62351226	63584	4933402E13Rik	51.64	6.64	2.59	-5.69	51.64	19.13	13.32	4.81	6.64	71.86	35.42	47.65	34.49	16.59	6.31	8.76	14.29	16.92	4.91	7.41	2.1	6.69	10.42	2.8
61817	chr8	81489884	81490884	147822	Inpp4b	75.56	14.89	2.01	-5.68	75.56	25.56	32.34	34.58	14.89	63.47	76.21	87.01	46.38	13.48	16.83	33.93	36.29	26.79	47.83	32.82	23.08	5.35	14.1	25.22
5264	chr10	9094778	9095778	-209208	Sash1	62.09	11.32	2.08	-5.68	62.09	29.99	18.28	4.86	11.32	70.66	42.4	73.2	44	21.78	24.19	16.42	18.69	19.74	6.13	4.24	4.2	13.37	12.88	7.71
41412	chr3	82376700	82377700	19013	Map9	54.67	9.27	2.19	-5.68	54.67	11.62	13.74	8.96	9.27	51.5	48.3	64.22	11.89	11.41	11.57	13.14	15.39	12.69	3.68	12.71	10.49	8.02	8.58	11.21
22088	chr15	7601436	7602436	-203541	Egflam	50.04	7.44	2.4	-5.67	50.04	14.56	12.95	8.32	7.44	49.1	40.25	60.77	15.46	12.45	15.78	20.8	11	7.05	12.26	10.59	2.1	9.36	7.36	5.61
19163	chr14	10212942	10213942	240016	Fhit	62.12	11.17	2.09	-5.65	62.12	35.6	33.64	17.21	11.17	71.86	46.15	68.36	53.52	24.89	28.4	36.12	35.19	29.61	14.72	20.12	16.78	8.02	17.78	7.71
3304	chr1	137955075	137956075	-10880	Mir181a-1	51.35	8.29	2.27	-5.65	51.35	23.87	23.41	11.7	8.29	51.5	44.54	58	30.92	22.82	17.88	17.51	32.99	19.74	17.17	11.65	6.29	7.35	9.81	7.71
18083	chr13	91581759	91582759	121162	Ssbp2	55.47	9.25	2.25	-5.62	55.47	26.32	21.68	12.59	9.25	69.46	37.57	59.39	30.92	23.85	24.19	17.51	26.39	21.15	13.49	15.88	8.39	7.35	9.2	11.21
13685	chr12	44462159	44463159	133774	Nrcam	53.28	7.65	2.42	-5.62	53.28	13.72	16.03	3.63	7.65	56.29	33.81	69.74	20.22	7.26	13.67	18.61	15.39	14.1	2.45	6.35	2.1	10.7	7.36	4.9
32735	chr19	17639263	17640263	197869	Pcsk5	45.09	5.1	2.8	-5.62	45.09	23.9	20.96	10.01	5.1	38.32	42.4	54.55	30.92	17.63	23.14	13.14	28.59	21.15	11.04	10.59	8.39	9.36	2.45	3.5
1773	chr1	73591260	73592260	-184191	Pinc	66.62	12.38	2.02	-5.61	66.62	7	7.31	5.67	12.38	87.42	46.15	66.29	9.51	6.22	5.26	5.47	6.6	9.87	8.59	2.12	6.29	14.71	14.72	7.71
29378	chr17	81010566	81011566	54019	Thumpd2	48.23	6.44	2.49	-5.6	48.23	16.61	25.13	20.24	6.44	53.89	39.71	51.1	32.11	10.37	7.36	22.99	24.19	28.2	19.62	20.12	20.98	10.03	3.68	5.61
1709	chr1	72170913	72171913	40894	Mreg	49.16	7.27	2.44	-5.59	49.16	31.87	24.71	15.46	7.27	56.29	35.96	55.24	47.57	23.85	24.19	21.89	29.69	22.56	14.72	21.18	10.49	5.35	7.36	9.11
53732	chr6	70215432	70216432	576243	Rpia	55.35	9.17	2.25	-5.59	55.35	30.29	18.28	5.56	9.17	65.87	35.96	64.22	51.14	16.59	23.14	20.8	14.29	19.74	6.13	6.35	4.2	7.35	11.04	9.11
38149	chr2	142169490	142170490	731474	Kif16b	63.94	11.83	2.04	-5.58	63.94	20.28	27.01	14.64	11.83	71.86	44.01	75.96	19.03	19.71	22.09	26.27	30.79	23.97	12.26	19.06	12.59	10.7	7.97	16.82
37016	chr2	106528971	106529971	-6368	Gm14015	56.54	9.61	2.18	-5.58	56.54	12.09	23.15	29.32	9.61	44.31	54.2	71.12	14.27	7.26	14.73	17.51	30.79	21.15	25.76	34.94	27.27	10.7	10.42	7.71
6634	chr10	60823873	60824873	7208	Unc5b	49.58	7.39	2.39	-5.57	49.58	19.59	33.8	38.61	7.39	57.48	38.1	53.17	28.54	18.67	11.57	32.84	41.78	26.79	44.15	38.12	33.57	7.35	9.2	5.61
31238	chr18	58203988	58204988	5438	Fbn2	60.31	11.51	2.01	-5.57	60.31	31.2	21.32	13.34	11.51	65.87	46.69	68.36	47.57	16.59	29.45	16.42	26.39	21.15	7.36	15.88	16.78	8.69	15.33	10.51
22317	chr15	16076434	16077434	-701167	Cdh9	53.88	8.69	2.27	-5.56	53.88	11.75	7.37	5.73	8.69	45.51	42.93	73.2	23.79	8.3	3.16	6.57	9.9	5.64	9.81	3.18	4.2	8.02	11.04	7.01
9351	chr11	19468307	19469307	403532	4933406G16Rik	51.82	7.9	2.32	-5.56	51.82	5.06	8.67	10.19	7.9	50.3	40.25	64.91	4.76	7.26	3.16	7.66	9.9	8.46	14.72	11.65	4.2	4.68	9.2	9.81
14866	chr12	89831041	89832041	19058	Nrxn3	50.38	6.87	2.47	-5.56	50.38	24.2	17.34	9.41	6.87	53.89	31.66	65.6	29.73	17.63	25.24	16.42	18.69	16.92	6.13	7.41	14.69	8.69	4.91	7.01
2133	chr1	86119220	86120220	-7750	Htr2b	47.49	6.44	2.55	-5.56	47.49	12.91	16.98	12.35	6.44	59.88	37.03	45.57	17.84	9.33	11.57	13.14	20.89	16.92	15.94	12.71	8.39	4.01	10.42	4.9
34632	chr2	18217601	18218601	153516	Mllt10	55.4	8.63	2.3	-5.55	55.4	15.2	18.29	12.04	8.63	56.29	38.1	71.81	22.6	10.37	12.62	14.23	20.89	19.74	9.81	9.53	16.78	10.03	11.65	4.2
67462	chrX	88236145	88237145	-121022	Il1rapl1	52.62	7.33	2.46	-5.55	52.62	22.58	16.98	5.21	7.33	50.3	34.35	73.2	33.3	19.71	14.73	15.33	18.69	16.92	6.13	5.29	4.2	5.35	6.13	10.51
45920	chr4	87939311	87940311	93596	Mllt3	49.04	7.2	2.38	-5.55	49.04	18.53	22.99	11.9	7.2	52.69	39.18	55.24	27.35	12.45	15.78	24.08	30.79	14.1	6.13	21.18	8.39	4.68	9.2	7.71
60918	chr8	47211832	47212832	77070	Stox2	49.93	7.44	2.39	-5.53	49.93	12.52	16.92	12	7.44	50.3	35.96	63.53	16.65	8.3	12.62	18.61	11	21.15	8.59	12.71	14.69	9.36	7.36	5.61
43704	chr3	154704430	154705430	-6203	Erich3	60.47	11.36	2.06	-5.53	60.47	15.49	19.75	13.11	11.36	49.1	51.52	80.79	21.41	12.45	12.62	18.61	20.89	19.74	17.17	15.88	6.29	8.69	13.49	11.91
32762	chr19	18573095	18574095	58218	Ostf1	60.45	9.38	2.31	-5.52	60.45	15.15	15.1	9.43	9.38	70.66	30.59	80.1	29.73	4.15	11.57	13.14	20.89	11.28	6.13	15.88	6.29	8.69	6.13	13.31
23332	chr15	64025175	64026175	-27609	Fam49b	47.98	6.72	2.43	-5.52	47.98	18.78	22.77	11.01	6.72	40.72	44.54	58.69	33.3	8.3	14.73	27.37	19.79	21.15	9.81	14.82	8.39	6.69	8.58	4.9
46580	chr4	109210550	109211550	-7363	Calr4	58.59	11.28	2.01	-5.51	58.59	22.29	25.56	16.43	11.28	59.88	50.98	64.91	34.49	15.56	16.83	16.42	36.29	23.97	20.85	13.76	14.69	12.03	9.2	12.61
9785	chr11	34124470	34125470	-26416	4930469K13Rik	55.75	10.29	2.08	-5.5	55.75	40.04	34.47	14.18	10.29	53.89	47.76	65.6	60.65	34.23	25.24	30.65	31.89	40.88	9.81	22.23	10.49	10.03	11.04	9.81
27168	chr17	4208063	4209063	-86461	4930548J01Rik	59.51	10.87	2.06	-5.47	59.51	5.47	9.41	14.92	10.87	69.46	43.47	65.6	5.95	5.19	5.26	7.66	12.1	8.46	18.4	13.76	12.59	8.69	9.2	14.71
44460	chr4	31569251	31570251	-394356	Map3k7	58.68	10.13	2.19	-5.47	58.68	11.71	21.47	19.02	10.13	52.69	46.69	76.65	14.27	12.45	8.41	22.99	23.09	18.33	23.3	21.18	12.59	9.36	4.91	16.12
58077	chr7	90649230	90650230	-173735	Tmem126b	51.14	8.67	2.27	-5.47	51.14	16.93	20.89	26.92	8.67	49.1	45.62	58.69	22.6	14.52	13.67	26.27	20.89	15.51	34.34	29.65	16.78	5.35	12.26	8.41
37330	chr2	117570833	117571833	-228456	Rasgrp1	47.95	7.3	2.42	-5.44	47.95	18.86	14.21	6.96	7.3	38.32	50.98	54.55	27.35	15.56	13.67	13.14	15.39	14.1	6.13	6.35	8.39	7.35	6.13	8.41
39605	chr3	8346777	8347777	115821	Gm6194	47.32	6.21	2.6	-5.43	47.32	29.37	30.57	17.01	6.21	44.31	37.57	60.08	46.38	24.89	16.83	22.99	36.29	32.43	18.4	13.76	18.88	11.37	3.07	4.2
6988	chr10	71464088	71465088	116825	Ipmk	55.48	9.77	2.16	-5.43	55.48	19.45	15.51	4.98	9.77	55.09	54.74	56.62	33.3	14.52	10.52	16.42	13.19	16.92	8.59	4.24	2.1	15.38	5.52	8.41
46373	chr4	103173074	103174074	41602	Slc35d1	56.99	8.39	2.34	-5.43	56.99	14.29	19.07	15.05	8.39	80.24	37.57	53.17	17.84	15.56	9.47	17.51	24.19	15.51	20.85	18	6.29	14.04	5.52	5.61
49012	chr5	38258000	38259000	-1685	Tmem128	45.13	4.63	2.9	-5.41	45.13	20.79	20.36	7.19	4.63	64.67	23.08	47.65	32.11	16.59	13.67	19.7	13.19	28.2	3.68	7.41	10.49	6.02	3.68	4.2
4035	chr1	165142346	165143346	17927	Tbx19	53.83	9.66	2.11	-5.41	53.83	19.93	27.42	17.61	9.66	53.89	46.15	61.46	19.03	18.67	22.09	28.46	24.19	29.61	23.3	16.94	12.59	9.36	9.81	9.81
26832	chr16	90080666	90081666	-61071	Gm10789	46.68	6.46	2.5	-5.39	46.68	24.9	24.4	12.17	6.46	56.29	35.42	48.34	39.25	21.78	13.67	22.99	31.89	18.33	12.26	11.65	12.59	5.35	4.91	9.11
40398	chr3	40508921	40509921	13491	1700017G19Rik	50.45	8.23	2.25	-5.39	50.45	14.05	16.35	21.56	8.23	49.1	45.62	56.62	20.22	12.45	9.47	14.23	16.49	18.33	18.4	12.71	33.57	6.02	11.65	7.01
38167	chr2	142624624	142625624	276340	Kif16b	61.57	10.55	2.16	-5.39	61.57	20.61	18.03	11.22	10.55	76.65	39.71	68.36	27.35	15.56	18.93	13.14	19.79	21.15	7.36	9.53	16.78	14.04	14.1	3.5
43969	chr4	9057384	9058384	-211409	Clvs1	65.21	11.59	2.09	-5.39	65.21	26.5	29.16	27.44	11.59	85.03	38.1	72.5	35.68	25.93	17.88	21.89	37.39	28.2	30.66	28.59	23.08	14.71	6.74	13.31
61294	chr8	61996826	61997826	69239	Ddx60	53.29	8.48	2.25	-5.37	53.29	18.16	22.31	5.62	8.48	67.06	37.57	55.24	27.35	14.52	12.62	15.33	21.99	29.61	7.36	7.41	2.1	8.02	5.52	11.91
30440	chr18	31085873	31086873	230755	Rit2	58.87	11.2	2.04	-5.37	58.87	31.7	23.24	10.36	11.2	63.47	41.32	71.81	42.81	21.78	30.5	27.37	19.79	22.56	11.04	11.65	8.39	13.37	10.42	9.81
41373	chr3	81368359	81369359	332443	Pdgfc	49.09	7.6	2.33	-5.37	49.09	12.47	17.29	5.86	7.6	55.09	44.54	47.65	15.46	10.37	11.57	16.42	14.29	21.15	4.91	8.47	4.2	10.03	8.58	4.2
50395	chr5	99224105	99225105	28322	Rasgef1b	59.11	11.21	2.05	-5.37	59.11	42.65	36.25	15.16	11.21	71.86	39.18	66.29	64.22	31.11	32.61	39.41	34.09	35.25	15.94	19.06	10.49	11.37	11.04	11.21
12711	chr12	3349769	3350769	-14863	Kif3c	57.64	10.85	2.03	-5.37	57.64	20.29	23.91	34.07	10.85	63.47	44.54	64.91	28.54	18.67	13.67	35.03	9.9	26.79	44.15	41.29	16.78	8.02	14.72	9.81
45869	chr4	86519711	86520711	38092	Saxo1	50.6	8.19	2.24	-5.36	50.6	5.17	11.08	8.67	8.19	55.09	40.79	55.93	7.14	4.15	4.21	10.95	11	11.28	4.91	14.82	6.29	6.69	7.36	10.51
28969	chr17	67114897	67115897	-89162	Mir5709	55.83	9.61	2.16	-5.36	55.83	30.86	21.52	9.7	9.61	63.47	41.86	62.15	48.76	24.89	18.93	20.8	19.79	23.97	12.26	4.24	12.59	6.69	6.74	15.41
5979	chr10	34172557	34173557	34494	Dse	53.8	9.06	2.15	-5.34	53.8	21.18	20.63	9.01	9.06	57.48	39.71	64.22	33.3	18.67	11.57	27.37	17.59	16.92	12.26	8.47	6.29	6.69	8.58	11.91
5380	chr10	13232913	13233913	-40276	Ltv1	69.92	13.18	2.03	-5.33	69.92	22.68	21.63	10.19	13.18	77.84	50.45	81.48	35.68	17.63	14.73	18.61	20.89	25.38	14.72	13.76	2.1	8.69	24.53	6.31
45660	chr4	78416858	78417858	-176689	A430085M09Rik	55.09	8.87	2.26	-5.32	55.09	18.99	21.47	6.27	8.87	53.89	45.08	66.29	29.73	7.26	19.99	18.61	17.59	28.2	6.13	8.47	4.2	2.01	14.1	10.51
57905	chr7	83429634	83430634	-154797	Tmc3	42.09	5.31	2.63	-5.31	42.09	9.57	13.37	25.1	5.31	47.9	34.88	43.5	13.08	9.33	6.31	14.23	13.19	12.69	25.76	26.47	23.08	4.01	4.91	7.01
34353	chr2	7837623	7838623	-441925	Celf2	47.01	6.98	2.38	-5.31	47.01	14.6	13.79	6.96	6.98	53.89	38.1	49.03	16.65	13.48	13.67	10.95	12.1	18.33	6.13	8.47	6.29	8.69	7.36	4.9
6885	chr10	69118598	69119598	-89454	Rhobtb1	61.14	9.64	2.28	-5.31	61.14	19.55	11.44	2.23	9.64	80.24	37.57	65.6	35.68	11.41	11.57	13.14	9.9	11.28	2.45	4.24	0	16.05	3.07	9.81
65350	chr9	78135163	78136163	22425	Ick	44.62	5.89	2.62	-5.3	44.62	13.22	15.05	6.74	5.89	61.08	32.74	40.05	16.65	9.33	13.67	13.14	16.49	15.51	8.59	9.53	2.1	4.01	7.36	6.31
23022	chr15	53021003	53022003	309058	Med30	48.37	6.48	2.55	-5.3	48.37	49.37	38.77	12.99	6.48	52.69	26.83	65.6	76.11	41.49	30.5	29.56	47.28	39.47	14.72	13.76	10.49	7.35	3.68	8.41
18541	chr13	104482780	104483780	195445	Adamts6	57.18	10.29	2.1	-5.29	57.18	16.97	14.21	8.88	10.29	70.66	35.96	64.91	23.79	15.56	11.57	13.14	15.39	14.1	9.81	6.35	10.49	10.03	11.04	9.81
19902	chr14	37421074	37422074	-286252	Ghitm	53.81	9.32	2.16	-5.28	53.81	15.1	7.52	4.5	9.32	53.89	44.01	63.53	20.22	12.45	12.62	9.85	9.9	2.82	6.13	3.18	4.2	14.04	5.52	8.41
56082	chr7	4492001	4493001	9179	Ppp1r12c	44.4	5.16	2.77	-5.26	44.4	10.62	11.65	12.58	5.16	63.47	28.98	40.74	13.08	10.37	8.41	10.95	9.9	14.1	13.49	11.65	12.59	6.02	2.45	7.01
57068	chr7	49539789	49540789	96546	Dbx1	55.55	9.51	2.16	-5.26	55.55	16.13	22.35	14.86	9.51	63.47	42.4	60.77	20.22	15.56	12.62	24.08	17.59	25.38	17.17	14.82	12.59	4.01	14.72	9.81
27915	chr17	30160654	30161654	156115	Zfand3	54.55	10.55	2.04	-5.26	54.55	35.57	27.37	14.57	10.55	63.47	45.62	54.55	53.52	31.11	22.09	21.89	26.39	33.84	11.04	15.88	16.78	10.03	10.42	11.21
9727	chr11	32576214	32577214	43448	Stk10	50.1	8.12	2.21	-5.26	50.1	23.24	22.87	13.34	8.12	57.48	42.4	50.41	32.11	17.63	19.99	29.56	16.49	22.56	14.72	12.71	12.59	8.69	7.97	7.71
18879	chr13	113844903	113845903	50895	Arl15	49	7.58	2.3	-5.24	49	25.14	17.18	9.2	7.58	57.48	37.03	52.48	35.68	15.56	24.19	24.08	17.59	9.87	8.59	12.71	6.29	8.02	9.81	4.9
63586	chr9	16138812	16139812	238919	Fat3	54.77	10.06	2.09	-5.23	54.77	20.66	15.88	6.57	10.06	57.48	53.67	53.17	28.54	14.52	18.93	13.14	7.7	26.79	4.91	10.59	4.2	10.03	6.13	14.01
962	chr1	43781107	43782107	46101	Uxs1	61.19	11.49	2.05	-5.23	61.19	25.66	31.86	17.44	11.49	76.65	36.49	70.43	40.44	19.71	16.83	24.08	26.39	45.11	19.62	18	14.69	10.03	15.33	9.11
61611	chr8	73328845	73329845	24195	Large1	52.06	8.99	2.17	-5.23	52.06	5.01	10.87	12.52	8.99	55.09	37.57	63.53	3.57	7.26	4.21	10.95	13.19	8.46	19.62	11.65	6.29	11.37	8.58	7.01
23206	chr15	59064638	59065638	16888	Mtss1	50.98	8.9	2.18	-5.22	50.98	26.52	33.86	52.73	8.9	56.29	43.47	53.17	35.68	20.74	23.14	29.56	39.58	32.43	53.96	41.29	62.94	9.36	6.13	11.21
53042	chr6	40381647	40382647	53988	E330009J07Rik	57.8	10.53	2.1	-5.21	57.8	37.83	31.92	9.95	10.53	75.45	36.49	61.46	65.41	21.78	26.3	21.89	32.99	40.88	9.81	13.76	6.29	11.37	10.42	9.81
67259	chrX	63593942	63594942	557756	Gm6760	35.18	2.43	3.54	-5.21	35.18	8.8	4.18	4.21	2.43	37.13	26.3	42.12	10.7	5.19	10.52	2.19	3.3	7.05	7.36	3.18	2.1	1.34	2.45	3.5
46870	chr4	119555576	119556576	13740	Foxj3	43.75	5.8	2.6	-5.21	43.75	20.61	12.44	2.92	5.8	45.51	38.1	47.65	27.35	16.59	17.88	10.95	16.49	9.87	2.45	2.12	4.2	8.02	7.97	1.4
11060	chr11	76982083	76983083	-16014	Slc6a4	39.39	3.7	3.06	-5.2	39.39	16.24	16.76	4.32	3.7	44.31	33.81	40.05	22.6	12.45	13.67	20.8	15.39	14.1	2.45	2.12	8.39	8.02	3.07	0
49240	chr5	47744073	47745073	-238582	Slit2	37.69	3.54	2.99	-5.2	37.69	14.14	21.52	9.71	3.54	33.53	33.27	46.27	22.6	12.45	7.36	29.56	20.89	14.1	12.26	10.59	6.29	4.68	2.45	3.5
9795	chr11	34343817	34344817	29495	Fam196b	50.39	8.44	2.23	-5.2	50.39	47.89	41.41	19.49	8.44	56.29	37.57	57.31	72.55	29.04	42.07	40.5	32.99	50.75	25.76	22.23	10.49	5.35	12.26	7.71
[truncated: 1,386 more rows]

## Sheet: 1-3 NPC vs NFC down
peakID	chr	start	end	toTSS	gene	mean_NPC	mean_NFC	log2FC	log10padj	mean_NPC	mean_No-C	mean_Lo-C	mean_Hi-C	mean_NFC	NPC_r1	NPC_r2	NPC_r3	NPC-0uM_r1	NPC-0uM_r2	NPC-0uM_r3	NPC-1_25uM_r1	NPC-1_25uM_r2	NPC-1_25uM_r3	NPC-5uM_r1	NPC-5uM_r2	NPC-5uM_r3	disc_r1	disc_r2	disc_r3
[truncated: 2,714 more rows]

[truncated: 3 more sheets: 2-1 lo-C vs hi-C all, 2-2 lo-C vs hi-C up, 2-3 lo-C vs hi-C down]
