# Supplementary material for: A β-catenin-driven switch in TCF/LEF transcription factor binding to DNA target sites promotes commitment of mammalian nephron progenitor cells
Source: eLife. 2021 Feb 15;10:e64444. doi: 10.7554/eLife.64444 (PMC7924951; doi:10.7554/eLife.64444)
Supplement: Supplementary file 4. [file elife-64444-supp4.xlsx]

## Sheet: Notes
This table relates to Fig. 5B
target1	gene symbol with TSS within +/-2.5 kb of anchor 1 (x1, y1)
target2	gene symbol with TSS within +/-2.5 kb of anchor 1 (x2, y2)
other columns:	Please refer to https://github.com/aidenlab/juicer/wiki/HiCCUPS and Rao et al., 2014 Supplemental Methods

## Sheet: Lo-CHIR only
chr1	x1	x2	chr2	y1	y2	name	score	strand1	strand2	color	observed	expectedBL	expectedDonut	expectedH	expectedV	binBL	binDonut	binH	binV	fdrBL	fdrDonut	fdrH	fdrV	target1	target2
1	135541693	135546693	1	135586527	135591527	.	.	.	.	0,0,0	108	43.1281	39.7821	43.3768	33.4262	16	16	16	15	2.02437e-10	2.62702e-10	3.36587e-10	3.95904e-16	NA	NA,Nav1,Gm4793
1	131289997	131294997	1	131543956	131548956	.	.	.	.	0,0,0	106	24.743	19.9232	27.3787	25.3586	14	13	14	14	3.69506e-22	1.77663e-29	6.00712e-22	5.64843e-22	NA,Ikbke	NA
1	165695000	165700000	1	165735030	165740030	.	.	.	.	0,0,0	120	41.7423	49.1969	43.1092	51.7084	16	17	16	17	5.52908e-07	0.00235927	8.35886e-07	0.00348886	NA,Rcsd1,Rcsd1	NA
1	16617464	16622464	1	16652558	16657558	.	.	.	.	0,0,0	104	48.6026	41.7668	50.6511	41.031	16	16	17	16	5.37161e-05	7.60015e-05	0.0537155	8.54359e-05	NA,Ube2w,Ube2w,Ube2w,Ube2w	NA,Tmem70,D030040B21Rik,Eloc,Tmem70,Eloc
1	75341649	75346649	1	75388399	75393399	.	.	.	.	0,0,0	80	30.5138	32.2597	44.5383	34.5236	14	15	16	15	1.36296e-10	2.07995e-06	0.00315059	2.19066e-06	NA	NA,Speg,Speg,Speg
1	179800045	179805045	1	179840000	179845000	.	.	.	.	0,0,0	80	41.8686	31.2092	30.2607	36.5718	16	15	14	15	0.0023763	2.07995e-06	1.9786e-10	2.19066e-06	NA,Ahctf1	NA
1	192734932	192739932	1	192770022	192775022	.	.	.	.	0,0,0	80	43.0174	36.9271	35.9196	45.7576	16	15	15	16	0.0023763	2.07995e-06	2.12902e-06	0.00336425	NA	NA,Hhat
1	74405044	74410044	1	74445000	74450000	.	.	.	.	0,0,0	78	39.6265	36.615	41.8551	35.5619	16	15	16	15	0.00538549	7.31155e-06	0.00722325	7.70693e-06	NA,Vil1,Mir26b	NA
1	165660042	165665042	1	165695042	165700042	.	.	.	.	0,0,0	108	44.6823	43.7241	42.5458	45.2455	16	16	16	16	0.00538549	0.00645974	0.00722325	0.00743002	NA	NA,Rcsd1,Rcsd1
1	75504912	75509912	1	75550010	75555010	.	.	.	.	0,0,0	102	32.5833	35.8662	32.9308	47.5742	15	15	15	16	1.95908e-05	2.46051e-05	2.52089e-05	0.0161365	NA,Obsl1,Inha,Stk11ip,Inha,Obsl1	NA,Slc4a3,Slc4a3,Slc4a3
1	131933740	131938740	1	131978734	131983734	.	.	.	.	0,0,0	100	30.9908	27.2894	27.043	33.2075	15	14	14	15	6.29043e-05	2.51807e-08	2.95884e-08	8.46979e-05	NA	NA,Slc45a3
1	130874991	130879991	1	131051115	131056115	.	.	.	.	0,0,0	72	10.1971	10.2758	12.833	12.2109	10	10	11	10	8.21769e-25	3.79588e-25	9.69777e-20	9.81489e-25	NA,Il24,Fcmr	NA
1	153289945	153294945	1	153327513	153332513	.	.	.	.	0,0,0	68	31.3462	35.6687	32.0714	35.2474	15	15	15	15	0.00147209	0.001744	0.00193476	0.00200874	NA	NA,Lamc1
1	134152504	134157504	1	134197486	134202486	.	.	.	.	0,0,0	78	27.7224	25.8121	25.9374	36.447	14	14	14	15	7.55894e-06	9.37923e-06	1.04601e-05	0.00505609	NA	NA,Mybph,Mybph
1	135962442	135967442	1	136002504	136007504	.	.	.	.	0,0,0	66	28.0207	29.858	29.7305	28.1791	14	14	14	14	7.55894e-06	9.37923e-06	1.04601e-05	1.06657e-05	NA	NA,Tmem9,Tmem9,Tmem9,Igfn1
1	179910025	179915025	1	179949999	179954999	.	.	.	.	0,0,0	66	34.1025	30.862	30.8998	37.245	15	14	14	15	0.0036945	9.37923e-06	1.04601e-05	0.00505609	NA	NA,Cdc42bpa,Cdc42bpa,Cdc42bpa,Cdc42bpa,Cdc42bpa,Cdc42bpa,Cdc42bpa,Cdc42bpa,Cdc42bpa,Cdc42bpa,Cdc42bpa,Cdc42bpa,Cdc42bpa
1	36150038	36155038	1	36230000	36235000	.	.	.	.	0,0,0	68	29.5168	26.892	37.9573	26.6651	14	14	15	14	2.8116e-05	3.47663e-05	0.0115155	3.97569e-05	NA,Mir6897	NA,Uggt1
1	128590041	128595041	1	128665008	128670008	.	.	.	.	0,0,0	66	22.7249	21.1094	30.9013	21.1212	13	13	14	13	1.90236e-08	1.89333e-08	3.90146e-05	2.63034e-08	NA,Cxcr4,Cxcr4	NA
1	72255000	72260000	1	72304976	72309976	.	.	.	.	0,0,0	62	26.5767	24.2814	28.9655	28.3335	14	13	14	14	9.71061e-05	1.05436e-07	0.000135863	0.000138322	NA,D230017M19Rik	NA,Xrcc5,Xrcc5,Xrcc5
1	74242488	74247488	1	74279976	74284976	.	.	.	.	0,0,0	74	28.4339	28.0122	32.1174	25.7361	14	14	15	14	9.71061e-05	0.000119655	0.0256062	0.000138322	NA,Arpc2,Arpc2	NA,Aamp,Aamp,Pnkd,Gpbar1,Pnkd
1	93664976	93669976	1	93724999	93729999	.	.	.	.	0,0,0	62	24.3262	26.1902	29.5222	29.3399	13	14	14	14	1.0447e-07	0.000119655	0.000135863	0.000138322	NA	NA,Thap4
1	36374977	36379977	1	36410045	36415045	.	.	.	.	0,0,0	60	34.9129	36.9788	36.7861	34.5415	15	15	15	15	0.0402183	0.0441069	0.0533244	0.055271	NA,Fer1l5,Kansl3,Kansl3	NA
1	86224933	86229933	1	86295022	86300022	.	.	.	.	0,0,0	60	17.5848	24.3485	28.8845	25.7232	12	13	14	14	2.66402e-10	5.50919e-07	0.000446413	0.000448046	NA	NA,B3gnt7,Gm28626
1	132256626	132261626	1	132295021	132300021	.	.	.	.	0,0,0	60	33.4742	31.443	26.5075	35.4648	15	15	14	15	0.0402183	0.0441069	0.000446413	0.055271	NA	NA,Klhdc8a
1	132365074	132370074	1	132422500	132427500	.	.	.	.	0,0,0	68	26.9999	24.8254	19.7136	29.5658	14	14	13	14	0.000315754	0.000387068	7.67142e-07	0.000448046	NA,Tmcc2	NA,Dstyk
1	134192531	134197531	1	134237510	134242510	.	.	.	.	0,0,0	60	27.9459	24.8199	18.602	25.0698	14	14	12	14	0.000315754	0.000387068	3.45156e-10	0.000448046	NA,Mybph,Chil1,Mybph	NA,Adora1,Adora1,Adora1,Adora1,Adora1
1	172247479	172252479	1	172287520	172292520	.	.	.	.	0,0,0	64	33.091	33.1867	25.4505	35.2783	15	15	14	15	0.0402183	0.0441069	0.000446413	0.055271	NA,Atp1a4	NA,Atp1a2
1	192785026	192790026	1	192844976	192849976	.	.	.	.	0,0,0	84	31.2864	32.9161	28.7424	32.4351	15	15	14	15	0.0402183	0.0441069	0.000446413	0.055271	NA	NA,Sertad4,1700065J18Rik,Gm15867,A730013G03Rik,Sertad4
1	131116004	131121004	1	131156010	131161010	.	.	.	.	0,0,0	76	19.7939	16.3191	17.9447	19.1716	13	12	12	12	2.60047e-06	1.74819e-09	2.58005e-09	2.50048e-09	NA	NA,Eif2d,Eif2d
1	191121678	191126678	1	191166678	191171678	.	.	.	.	0,0,0	58	25.2429	28.2247	28.3604	28.7033	14	14	14	14	0.000956817	0.00118414	0.00137067	0.00137378	NA	NA,Atf3,Fam71a
1	191669981	191674981	1	191710018	191715018	.	.	.	.	0,0,0	60	28.9921	30.8654	30.6246	28.8281	14	14	14	14	0.000956817	0.00118414	0.00137067	0.00137378	NA	NA,Lpgat1,Lpgat1
1	37540003	37545003	1	37632479	37637479	.	.	.	.	0,0,0	82	22.0685	19.6614	20.7368	23.6721	13	13	13	13	1.15321e-05	1.21293e-05	1.63764e-05	1.61125e-05	NA,Mgat4a,Mgat4a	NA
1	72454981	72459981	1	72575000	72580000	.	.	.	.	0,0,0	56	22.9317	21.0829	22.8582	23.9381	13	13	13	13	1.15321e-05	1.21293e-05	1.63764e-05	1.61125e-05	NA	NA,Smarcal1
1	89079975	89084975	1	89137460	89142460	.	.	.	.	0,0,0	58	23.7334	23.7069	29.2166	21.8069	13	13	14	13	1.15321e-05	1.21293e-05	0.00385165	1.61125e-05	NA,Sh3bp4	NA
1	89849999	89854999	1	89931267	89936267	.	.	.	.	0,0,0	64	21.7054	21.1694	19.5658	26.6648	13	13	13	14	1.15321e-05	1.21293e-05	1.63764e-05	0.00385202	NA	NA,Gbx2
1	167220006	167225006	1	167310054	167315054	.	.	.	.	0,0,0	90	18.9803	16.0618	30.4236	14.7371	12	12	14	11	1.40341e-08	1.23176e-08	0.00385165	7.6069e-12	NA	NA,Tmco1
1	36172448	36177448	1	36234982	36239982	.	.	.	.	0,0,0	68	22.1977	26.236	29.4705	26.0817	13	14	14	14	4.76276e-05	0.00848507	0.0101081	0.0100593	NA	NA,Uggt1
1	86615000	86620000	1	86655033	86660033	.	.	.	.	0,0,0	78	24.602	22.4866	25.6079	21.8795	14	13	14	13	0.00702877	5.0634e-05	0.0101081	6.7155e-05	NA	NA,Nppc
1	87046248	87051248	1	87191224	87196224	.	.	.	.	0,0,0	60	22.176	16.7373	18.0949	22.0311	13	12	12	13	4.76276e-05	8.14775e-08	1.20339e-07	6.7155e-05	NA	NA,Prss56,Chrnd,Chrng
1	153245000	153250000	1	153324983	153329983	.	.	.	.	0,0,0	54	20.8043	19.455	18.4622	26.5057	13	12	12	14	4.76276e-05	8.14775e-08	1.20339e-07	0.0100593	NA	NA,Lamc1
1	182145789	182150789	1	182288326	182293326	.	.	.	.	0,0,0	54	10.0521	13.2384	16.596	14.0376	10	11	12	11	2.1583e-14	5.00592e-11	1.20339e-07	7.76987e-11	NA,Vmn1r1	NA,1700047M11Rik,Degs1,Degs1
1	191380026	191385026	1	191540047	191545047	.	.	.	.	0,0,0	88	18.4276	22.6406	24.4563	24.105	12	13	13	13	9.15139e-08	5.0634e-05	6.72711e-05	6.7155e-05	NA,Ppp2r5a	NA
1	59444954	59449954	1	59479984	59484984	.	.	.	.	0,0,0	52	30.7452	26.0675	30.0333	23.8723	14	14	14	13	0.0171209	0.0202867	0.0242977	0.000255018	NA	NA,Fzd7
1	93356675	93361675	1	93421670	93426670	.	.	.	.	0,0,0	52	23.9515	22.676	24.2214	21.8561	13	13	13	13	0.000179309	0.00019367	0.000257224	0.000255018	NA,Mir6902,Mir6345,Ano7,Ano7	NA
1	136162514	136167514	1	136207518	136212518	.	.	.	.	0,0,0	52	27.7512	27.5912	22.2501	29.8542	14	14	13	14	0.0171209	0.0202867	0.000257224	0.024324	NA	NA,Mroh3
1	178328763	178333763	1	178404992	178409992	.	.	.	.	0,0,0	76	20.395	21.4583	23.2236	27.6432	13	13	13	14	0.000179309	0.00019367	0.000257224	0.024324	NA,Cox20,Hnrnpu,Hnrnpu	NA,Efcab2
1	180277478	180282478	1	180327478	180332478	.	.	.	.	0,0,0	62	20.5487	17.943	22.2131	16.6311	13	12	13	12	0.000179309	5.03044e-07	0.000257224	7.06697e-07	NA	NA,Itpkb,Gm5069
1	182411689	182416689	1	182453337	182458337	.	.	.	.	0,0,0	60	21.1956	21.0774	22.1798	23.9213	13	13	13	13	0.000179309	0.00019367	0.000257224	0.000255018	NA,Trp53bp2	NA
1	182905000	182910000	1	182942539	182947539	.	.	.	.	0,0,0	52	26.0514	27.8648	29.2396	25.8402	14	14	14	14	0.0171209	0.0202867	0.0242977	0.024324	NA	NA,Tlr5
1	86184959	86189959	1	86310033	86315033	.	.	.	.	0,0,0	50	19.2564	25.2923	29.6962	27.0156	12	14	14	14	3.0288e-06	0.0444927	0.0539207	0.0540063	NA	NA,B3gnt7,Gm28626
1	132889960	132894960	1	132960000	132965000	.	.	.	.	0,0,0	50	20.6072	22.5632	23.4239	25.4473	13	13	13	14	0.000624846	0.000684552	0.000899735	0.0540063	NA,Lrrn2	NA
1	178539974	178544974	1	178580025	178585025	.	.	.	.	0,0,0	50	26.7448	25.9957	28.1597	22.6062	14	14	14	13	0.0381449	0.0444927	0.0539207	0.000891467	NA,Kif26b	NA
1	185249999	185254999	1	185290037	185295037	.	.	.	.	0,0,0	50	26.4284	27.2496	28.5832	28.3969	14	14	14	14	0.0381449	0.0444927	0.0539207	0.0540063	NA,Mir664,Snora36b	NA
1	189640012	189645012	1	189677506	189682506	.	.	.	.	0,0,0	64	22.5349	17.8995	23.0584	24.4351	13	12	13	13	0.000624846	2.8171e-06	0.000899735	0.000891467	NA	NA,Cenpf
1	191774975	191779975	1	191810012	191815012	.	.	.	.	0,0,0	50	23.9721	20.8725	25.8831	21.6641	13	13	14	13	0.000624846	0.000684552	0.0539207	0.000891467	NA	NA,Nek2
1	72397458	72402458	1	72575003	72580003	.	.	.	.	0,0,0	48	11.851	16.4488	17.2004	18.8618	10	12	12	12	5.21164e-11	1.46372e-05	2.00658e-05	1.99038e-05	NA	NA,Smarcal1
1	93676685	93681685	1	93754988	93759988	.	.	.	.	0,0,0	52	19.5417	21.2157	23.3846	18.101	12	13	13	12	1.5342e-05	0.0022036	0.00288377	1.99038e-05	NA,Bok	NA,Thap4,Atg4b
1	130870724	130875724	1	130975707	130980707	.	.	.	.	0,0,0	64	10.8811	11.5079	15.5919	11.9791	10	10	12	10	5.21164e-11	3.60598e-11	2.00658e-05	6.18407e-11	NA,Il24,Fcmr	NA
1	133847488	133852488	1	133892488	133897488	.	.	.	.	0,0,0	50	22.7713	22.2896	21.0235	21.948	13	13	13	13	0.00199232	0.0022036	0.00288377	0.00286254	NA	NA,Optc,Optc,Optc,Optc
1	136179976	136184976	1	136250023	136255023	.	.	.	.	0,0,0	48	17.6304	18.3832	21.3717	15.1829	12	12	13	11	1.5342e-05	1.46372e-05	0.00288377	5.00031e-08	NA	NA,Gpr25
1	156754994	156759994	1	156824970	156829970	.	.	.	.	0,0,0	48	18.4341	21.0569	21.7436	20.6488	12	13	13	13	1.5342e-05	0.0022036	0.00288377	0.00286254	NA	NA,Angptl1
1	166159988	166164988	1	166369980	166374980	.	.	.	.	0,0,0	48	14.1329	10.1414	17.5159	10.9342	11	10	12	10	4.42902e-08	3.60598e-11	2.00658e-05	6.18407e-11	NA	NA,Tada1
1	172585011	172590011	1	172632494	172637494	.	.	.	.	0,0,0	48	20.9352	22.7104	22.4012	24.537	13	13	13	13	0.00199232	0.0022036	0.00288377	0.00286254	NA,Slamf8	NA,Dusp23
1	106652521	106657521	1	106704989	106709989	.	.	.	.	0,0,0	66	19.6887	20.3488	17.3772	19.5694	13	13	12	13	0.0057497	0.00644834	9.24471e-05	0.00826849	NA	NA,Bcl2,Bcl2
1	106755010	106760010	1	106795000	106800000	.	.	.	.	0,0,0	60	23.9278	21.919	18.4974	20.6027	13	13	12	13	0.0057497	0.00644834	9.24471e-05	0.00826849	NA,Kdsr,Kdsr	NA,Vps4b
1	178404999	178409999	1	178444989	178449989	.	.	.	.	0,0,0	78	18.9523	16.5908	15.8538	21.5689	12	12	12	13	7.0485e-05	6.90113e-05	9.24471e-05	0.00826849	NA,Efcab2	NA
1	37478336	37483336	1	37534968	37539968	.	.	.	.	0,0,0	74	18.817	18.9258	21.3172	19.8571	12	12	13	13	0.000293111	0.000295744	0.0217121	0.0219071	NA,4930594C11Rik	NA,Mgat4a,Mgat4a
1	64535000	64540000	1	64608305	64613305	.	.	.	.	0,0,0	56	16.4077	14.5824	18.8015	15.8	12	11	12	12	0.000293111	1.73377e-06	0.000389273	0.000387596	NA,Creb1,Creb1,Creb1	NA,Mettl21a
1	133930000	133935000	1	133985000	133990000	.	.	.	.	0,0,0	44	16.2755	20.2384	21.7412	19.586	12	13	13	13	0.000293111	0.017148	0.0217121	0.0219071	NA,Prelp	NA
1	133987534	133992534	1	134032514	134037514	.	.	.	.	0,0,0	44	17.7857	18.8307	15.5765	22.6609	12	12	12	13	0.000293111	0.000295744	0.000389273	0.0219071	NA	NA,Fmod
1	194974990	194979990	1	195035000	195040000	.	.	.	.	0,0,0	44	23.9844	18.4551	23.7106	17.4039	13	12	13	12	0.0152065	0.000295744	0.0217121	0.000387596	NA,Gm16897	NA,Mir29b-2,Mir29c
1	9700009	9705009	1	9744990	9749990	.	.	.	.	0,0,0	54	14.1253	12.6114	14.8402	12.6425	11	11	11	11	1.24015e-05	1.04956e-05	1.4655e-05	1.43615e-05	NA,Mybl1,Mybl1	NA,1700034P13Rik,Vcpip1
1	24135000	24140000	1	24170009	24175009	.	.	.	.	0,0,0	50	19.0553	17.5344	18.1747	17.6465	12	12	12	12	0.00109074	0.00113134	0.00146086	0.00144164	NA	NA,Col9a1
1	36739990	36744990	1	36780009	36785009	.	.	.	.	0,0,0	42	17.9371	15.7558	16.538	16.3495	12	12	12	12	0.00109074	0.00113134	0.00146086	0.00144164	NA	NA,Zap70
1	36884971	36889971	1	36925009	36930009	.	.	.	.	0,0,0	42	23.852	21.9717	18.3811	23.8333	13	13	12	13	0.0365944	0.0411484	0.00146086	0.0521681	NA	NA,Tmem131
1	58400000	58405000	1	58455009	58460009	.	.	.	.	0,0,0	52	20.6363	18.3234	19.1405	18.1339	13	12	12	12	0.0365944	0.00113134	0.00146086	0.00144164	NA,Bzw1	NA,Ppil3,Nif3l1,Ppil3,Ppil3,Ppil3
1	64069972	64074972	1	64105009	64110009	.	.	.	.	0,0,0	52	17.6923	17.1291	17.1634	18.8819	12	12	12	12	0.00109074	0.00113134	0.00146086	0.00144164	NA	NA,Klf7
1	74072511	74077511	1	74124993	74129993	.	.	.	.	0,0,0	80	22.4722	21.2821	23.1566	23.4832	13	13	13	13	0.0365944	0.0411484	0.0516631	0.0521681	NA	NA,Tns1,Tns1,Rufy4,Rufy4
1	85850000	85855000	1	85895000	85900000	.	.	.	.	0,0,0	58	19.0592	19.1816	15.8323	15.5107	12	12	12	11	0.00109074	0.00113134	0.00146086	1.43615e-05	NA	NA,Itm2c
1	88562513	88567513	1	88620009	88625009	.	.	.	.	0,0,0	42	21.2021	20.5735	23.0993	21.7636	13	13	13	13	0.0365944	0.0411484	0.0516631	0.0521681	NA,Gm19589	NA
1	88764972	88769972	1	88900009	88905009	.	.	.	.	0,0,0	42	17.0803	17.2765	24.3714	15.3567	12	12	13	11	0.00109074	0.00113134	0.0516631	1.43615e-05	NA,Platr5	NA
1	127205000	127210000	1	127301671	127306671	.	.	.	.	0,0,0	44	18.4765	17.6901	20.6088	16.7203	12	12	13	12	0.00109074	0.00113134	0.0516631	0.00144164	NA,Mgat5	NA
1	130686667	130691667	1	130778335	130783335	.	.	.	.	0,0,0	56	11.5755	11.7647	12.5329	15.7442	10	10	11	12	5.7751e-08	4.42904e-08	1.4655e-05	0.00144164	NA,C4bp-ps1	NA,Gm28856
1	151492469	151497469	1	151692513	151697513	.	.	.	.	0,0,0	42	12.4701	14.7178	13.376	21.2635	11	11	11	13	1.24015e-05	1.04956e-05	1.4655e-05	0.0521681	NA,Rnf2,Rnf2,Rnf2,Rnf2	NA
1	152574991	152579991	1	152620008	152625008	.	.	.	.	0,0,0	60	17.3659	19.1317	19.1576	23.4602	12	12	12	13	0.00109074	0.00113134	0.00146086	0.0521681	NA	NA,Rgl1
1	153125008	153130008	1	153190000	153195000	.	.	.	.	0,0,0	52	18.9283	21.5832	21.4492	24.2993	12	13	13	13	0.00109074	0.0411484	0.0516631	0.0521681	NA	NA,Lamc2
1	155809967	155814967	1	155859991	155864991	.	.	.	.	0,0,0	50	16.4756	17.3968	20.0339	24.0995	12	12	13	13	0.00109074	0.00113134	0.0516631	0.0521681	NA,Qsox1,Qsox1	NA
1	165494978	165499978	1	165550021	165555021	.	.	.	.	0,0,0	46	18.9902	20.5194	23.8752	20.5278	12	13	13	13	0.00109074	0.0411484	0.0516631	0.0521681	NA,Adcy10,Adcy10	NA
1	167234999	167239999	1	167275002	167280002	.	.	.	.	0,0,0	66	20.0159	21.2732	22.1499	22.265	13	13	13	13	0.0365944	0.0411484	0.0516631	0.0521681	NA	NA,Uck2,Mir6347
1	179544991	179549991	1	179585000	179590000	.	.	.	.	0,0,0	50	20.6821	22.8818	20.4714	22.4574	13	13	13	13	0.0365944	0.0411484	0.0516631	0.0521681	NA,Cnst,Tfb2m,Tfb2m,Tfb2m	NA
1	182762495	182767495	1	182959982	182964982	.	.	.	.	0,0,0	48	16.8657	12.7408	12.243	18.2874	12	11	10	12	0.00109074	1.04956e-05	6.6567e-08	0.00144164	NA,Susd4,Susd4,Susd4,Susd4,Susd4	NA,Tlr5
1	191614991	191619991	1	191711688	191716688	.	.	.	.	0,0,0	44	14.7718	17.92	22.5299	21.0082	11	12	13	13	1.24015e-05	0.00113134	0.0516631	0.0521681	NA	NA,Lpgat1,Lpgat1
1	39540025	39545025	1	39650000	39655000	.	.	.	.	0,0,0	44	16.9669	13.469	15.9357	18.4874	12	11	12	12	0.00368742	5.79125e-05	0.0048989	0.0048709	NA,Cnot11,Snord89	NA,Creg2
1	40578334	40583334	1	40763334	40768334	.	.	.	.	0,0,0	40	7.64439	8.22391	10.5993	10.7844	8	9	10	10	5.12414e-12	1.51739e-09	5.593e-07	5.83388e-07	NA,Slc9a4	NA
1	71562495	71567495	1	72120000	72125000	.	.	.	.	0,0,0	40	15.7291	15.4087	17.4257	17.8641	12	11	12	12	0.00368742	5.79125e-05	0.0048989	0.0048709	NA,Atic	NA
1	74202504	74207504	1	74279975	74284975	.	.	.	.	0,0,0	44	13.9408	12.0441	15.5554	14.4285	11	10	11	11	6.52467e-05	3.88536e-07	7.84691e-05	7.78082e-05	NA,Cxcr1,Mir1928	NA,Aamp,Aamp,Pnkd,Gpbar1,Pnkd
1	105995000	106000000	1	106032495	106037495	.	.	.	.	0,0,0	46	18.2353	15.4814	18.8099	16.4838	12	11	12	12	0.00368742	5.79125e-05	0.0048989	0.0048709	NA,Zcchc2,Gm7160,Zcchc2	NA
1	121437506	121442506	1	121487498	121492498	.	.	.	.	0,0,0	50	21.2932	18.7696	18.0894	19.258	13	12	12	12	0.0800953	0.00388347	0.0048989	0.0048709	NA,Ccdc93,Ccdc93	NA
1	125504991	125509991	1	125555000	125560000	.	.	.	.	0,0,0	48	16.0095	17.03	18.8902	15.7471	12	12	12	12	0.00368742	0.00388347	0.0048989	0.0048709	NA	NA,Slc35f5,Slc35f5
1	131772487	131777487	1	131849987	131854987	.	.	.	.	0,0,0	40	14.7266	15.6006	18.8742	14.0681	11	12	12	11	6.52467e-05	0.00388347	0.0048989	7.78082e-05	NA	NA,Rab29
1	10042500	10047500	1	10087500	10092500	.	.	.	.	0,0,0	38	13.3257	14.4634	17.6961	16.2684	11	11	12	12	0.000309348	0.000287016	0.0147779	0.0147251	NA,Cops5,Cops5,Cspp1,Cops5	NA
1	80279984	80284984	1	80327480	80332480	.	.	.	.	0,0,0	52	19.467	17.8828	11.1508	18.9203	12	12	10	12	0.0111176	0.0119182	4.27537e-06	0.0147251	NA	NA,Cul3,Cul3
1	86667480	86672480	1	86910007	86915007	.	.	.	.	0,0,0	38	15.6133	15.6492	19.4916	14.4964	12	12	12	11	0.0111176	0.0119182	0.0147779	0.00037049	NA,Nppc	NA
1	87630000	87635000	1	87665015	87670015	.	.	.	.	0,0,0	38	16.0862	17.5972	18.4274	16.4894	12	12	12	12	0.0111176	0.0119182	0.0147779	0.0147251	NA,Inpp5d,Inpp5d,Inpp5d,Inpp5d	NA
1	133699996	133704996	1	134044996	134049996	.	.	.	.	0,0,0	38	12.1025	9.94645	8.77255	16.3246	10	10	9	12	3.68718e-06	3.05739e-06	2.92834e-08	0.0147251	NA,Lax1,Lax1	NA,Fmod
1	13789992	13794992	1	14684992	14689992	.	.	.	.	0,0,0	36	5.53049	8.37877	17.4649	6.66088	7	9	12	8	7.44933e-12	1.99826e-07	0.0390663	1.82112e-09	NA,Gm5523	NA
1	20935000	20940000	1	21215000	21220000	.	.	.	.	0,0,0	36	7.85586	8.84849	12.4507	5.82783	9	9	11	7	2.50448e-07	1.99826e-07	0.00157772	6.47014e-12	NA,Efhc1	NA,Tmem14a,Tmem14a
1	51812517	51817517	1	51905000	51910000	.	.	.	.	0,0,0	36	12.615	13.942	15.4312	17.1361	11	11	11	12	0.00129874	0.00125832	0.00157772	0.0392094	NA	NA,Myo1b,Myo1b,Myo1b
1	58297496	58302496	1	58387503	58392503	.	.	.	.	0,0,0	42	11.3137	9.85517	10.4082	10.3781	10	10	10	10	2.46826e-05	2.10581e-05	2.8219e-05	2.91867e-05	NA	NA,Bzw1
1	74459993	74464993	1	74494996	74499996	.	.	.	.	0,0,0	68	15.5726	16.5849	16.8658	15.4173	12	12	12	11	0.0296973	0.0322078	0.0390663	0.00154596	NA	NA,Usp37,Cnot9
1	118824993	118829993	1	119050000	119055000	.	.	.	.	0,0,0	42	12.6907	16.5078	15.4407	16.7464	11	12	11	12	0.00129874	0.0322078	0.00157772	0.0392094	NA	NA,Gli2
1	128169986	128174986	1	128205000	128210000	.	.	.	.	0,0,0	36	15.2102	17.1973	16.3158	14.9897	11	12	12	11	0.00129874	0.0322078	0.0390663	0.00154596	NA	NA,Mir128-1
1	130547496	130552496	1	130632496	130637496	.	.	.	.	0,0,0	36	16.6282	15.0012	15.4272	18.4926	12	11	11	12	0.0296973	0.00125832	0.00157772	0.0392094	NA	NA,Zp3r
1	131275016	131280016	1	131564979	131569979	.	.	.	.	0,0,0	94	19.0962	11.5748	11.4164	9.85255	12	10	10	10	0.0296973	2.10581e-05	2.8219e-05	2.91867e-05	NA,Ikbke	NA
1	133234993	133239993	1	133304989	133309989	.	.	.	.	0,0,0	46	16.994	17.7976	19.3376	17.7858	12	12	12	12	0.0296973	0.0322078	0.0390663	0.0392094	NA,Plekha6,Plekha6	NA,Golt1a
1	133795006	133800006	1	133890013	133895013	.	.	.	.	0,0,0	52	16.2519	15.4857	13.3188	18.3816	12	11	11	12	0.0296973	0.00125832	0.00157772	0.0392094	NA	NA,Optc,Optc,Optc
1	149899993	149904993	1	149945013	149950013	.	.	.	.	0,0,0	38	17.1961	17.8517	17.0503	15.1856	12	12	12	11	0.0296973	0.0322078	0.0390663	0.00154596	NA	NA,Pla2g4a
1	155150013	155155013	1	155205000	155210000	.	.	.	.	0,0,0	60	17.6563	17.0923	16.8054	18.7668	12	12	12	12	0.0296973	0.0322078	0.0390663	0.0392094	NA,Mr1,Stx6,Mr1,Mr1	NA
1	162924979	162929979	1	163039993	163044993	.	.	.	.	0,0,0	40	11.2768	16.7713	13.253	16.337	10	12	11	12	2.46826e-05	0.0322078	0.00157772	0.0392094	NA,Fmo6	NA
1	169527503	169532503	1	170132506	170137506	.	.	.	.	0,0,0	36	2.83957	3.34499	5.54744	3.68284	4	5	7	5	4.40456e-20	2.42104e-17	7.3776e-12	1.83836e-17	NA,Nuf2,Nuf2	NA
1	182560006	182565006	1	182729993	182734993	.	.	.	.	0,0,0	36	15.0432	13.9275	19.3059	13.4362	11	11	12	11	0.00129874	0.00125832	0.0390663	0.00154596	NA,Capn8,Capn8	NA
1	182860013	182865013	1	182965013	182970013	.	.	.	.	0,0,0	36	16.9355	13.3948	9.70356	19.2482	12	11	9	12	0.0296973	0.00125832	3.01536e-07	0.0392094	NA	NA,Tlr5
1	195040000	195045000	1	195129993	195134993	.	.	.	.	0,0,0	36	11.1177	11.6135	14.1503	15.0556	10	10	11	11	2.46826e-05	2.10581e-05	0.00157772	0.00154596	NA,Mir29b-2,Mir29c	NA,Cr1l,Cr1l,Cr1l
1	34535006	34540006	1	34582490	34587490	.	.	.	.	0,0,0	34	13.8038	17.8311	14.1544	17.8475	11	12	11	12	0.00477156	0.0770009	0.0057994	0.0928797	NA,Cfc1,Cfc1	NA,Amer3
1	36524980	36529980	1	36674987	36679987	.	.	.	.	0,0,0	42	18.2337	15.3205	15.0846	17.2388	12	11	11	12	0.0708272	0.00477465	0.0057994	0.0928797	NA,Ankrd23,Ankrd23	NA,Cox5b,Fam178b,Fam178b
1	36694980	36699980	1	36739993	36744993	.	.	.	.	0,0,0	34	17.1905	16.0708	11.2461	16.9919	12	12	10	12	0.0708272	0.0770009	0.000166057	0.0928797	NA,Actr1b,Cox5b,Fam178b,Fam178b	NA
1	37149996	37154996	1	37215003	37220003	.	.	.	.	0,0,0	44	15.7317	16.2275	18.7159	16.949	12	12	12	12	0.0708272	0.0770009	0.0921578	0.0928797	NA	NA,Cnga3,Cnga3
1	57423750	57428750	1	58031248	58036248	.	.	.	.	0,0,0	34	10.8402	9.41091	17.6516	8.2567	10	9	12	9	0.000143123	1.92897e-06	0.0921578	2.78294e-06	NA	NA,Aox1
1	61630006	61635006	1	61760007	61765007	.	.	.	.	0,0,0	34	10.5838	10.0008	9.40179	12.7345	10	10	9	11	0.000143123	0.000128458	2.73076e-06	0.00569329	NA,Pard3b	NA
1	72647490	72652490	1	72699981	72704981	.	.	.	.	0,0,0	34	13.6898	13.5206	13.4725	16.0754	11	11	11	12	0.00477156	0.00477465	0.0057994	0.0928797	NA	NA,Ankar,Rpl37a,Ankar
1	74610018	74615018	1	74700003	74705003	.	.	.	.	0,0,0	52	13.4679	15.2758	15.7187	15.5215	11	11	12	11	0.00477156	0.00477465	0.0921578	0.00569329	NA,Rnf25,Stk36,Rnf25	NA,Cyp27a1
1	84754987	84759987	1	84830003	84835003	.	.	.	.	0,0,0	42	12.1188	13.3106	14.5781	16.6459	10	11	11	12	0.000143123	0.00477465	0.0057994	0.0928797	NA	NA,Fbxo36,Trip12
1	90784984	90789984	1	90829993	90834993	.	.	.	.	0,0,0	52	16.2482	15.5914	15.2698	13.936	12	12	11	11	0.0708272	0.0770009	0.0057994	0.00569329	NA	NA,Col6a3,Col6a3
1	92490000	92495000	1	92554981	92559981	.	.	.	.	0,0,0	34	16.9811	18.3307	19.2618	18.477	12	12	12	12	0.0708272	0.0770009	0.0921578	0.0928797	NA,Olfr1416,Olfr1415	NA
1	93172496	93177496	1	93347490	93352490	.	.	.	.	0,0,0	36	12.973	13.7003	18.1955	13.7589	11	11	12	11	0.00477156	0.00477465	0.0921578	0.00569329	NA,2310007B03Rik,Crocc2,2310007B03Rik	NA,Mir6902,Ppp1r7,Pask,Mir6345
1	119834996	119839996	1	119914978	119919978	.	.	.	.	0,0,0	34	13.2782	13.7634	19.0618	12.9639	11	11	12	11	0.00477156	0.00477465	0.0921578	0.00569329	NA,Ptpn4	NA,Tmem177
1	120225012	120230012	1	120275006	120280006	.	.	.	.	0,0,0	34	14.2875	14.7346	14.5491	15.7671	11	11	11	12	0.00477156	0.00477465	0.0057994	0.0928797	NA	NA,Steap3,Steap3
1	120329999	120334999	1	120464981	120469981	.	.	.	.	0,0,0	34	10.3679	12.3972	17.723	15.2705	10	11	12	11	0.000143123	0.00477465	0.0921578	0.00569329	NA,C1ql2	NA
1	130679987	130684987	1	130725012	130730012	.	.	.	.	0,0,0	34	16.8168	15.9393	17.6025	13.3285	12	12	12	11	0.0708272	0.0770009	0.0921578	0.00569329	NA,C4bp-ps1	NA,Pfkfb2,Yod1,AA986860,Pfkfb2,Pfkfb2,Pfkfb2
1	132234996	132239996	1	132359996	132364996	.	.	.	.	0,0,0	38	10.3066	10.3044	9.1381	13.6267	10	10	9	11	0.000143123	0.000128458	2.73076e-06	0.00569329	NA,Lemd1,Lemd1,Lemd1	NA,Tmcc2
1	133930005	133935005	1	134025005	134030005	.	.	.	.	0,0,0	42	13.0978	15.7539	9.1067	17.0234	11	12	9	12	0.00477156	0.0770009	2.73076e-06	0.0928797	NA,Prelp	NA,Fmod
1	134449994	134454994	1	134605000	134610000	.	.	.	.	0,0,0	40	15.8034	13.2335	11.2562	16.8462	12	11	10	12	0.0708272	0.00477465	0.000166057	0.0928797	NA,Klhl12,Klhl12	NA
1	138902502	138907502	1	138959982	138964982	.	.	.	.	0,0,0	34	12.2498	13.2429	13.2792	15.1766	10	11	11	11	0.000143123	0.00477465	0.0057994	0.00569329	NA	NA,Dennd1b,Dennd1b
1	154227502	154232502	1	154727520	154732520	.	.	.	.	0,0,0	38	10.4023	9.7003	6.71553	14.7282	10	9	8	11	0.000143123	1.92897e-06	2.75959e-08	0.00569329	NA	NA,Cacna1e
1	156475011	156480011	1	156535005	156540005	.	.	.	.	0,0,0	34	14.9628	14.7074	18.5098	13.0894	11	11	12	11	0.00477156	0.00477465	0.0921578	0.00569329	NA,Soat1	NA
1	159912491	159917491	1	160068763	160073763	.	.	.	.	0,0,0	34	11.0136	11.4503	11.4319	12.5811	10	10	10	11	0.000143123	0.000128458	0.000166057	0.00569329	NA	NA,4930562F07Rik,4930562F07Rik
1	164930005	164935005	1	164994982	164999982	.	.	.	.	0,0,0	36	13.1836	13.2506	15.1504	15.0783	11	11	11	11	0.00477156	0.00477465	0.0057994	0.00569329	NA,Xcl1	NA
1	166163329	166168329	1	166249994	166254994	.	.	.	.	0,0,0	40	14.735	13.2672	13.6253	13.5145	11	11	11	11	0.00477156	0.00477465	0.0057994	0.00569329	NA	NA,Ildr2,Mael,Ildr2,Ildr2,Ildr2,Ildr2,Ildr2
1	167454994	167459994	1	167490000	167495000	.	.	.	.	0,0,0	38	16.4838	17.0844	17.1937	19.4747	12	12	12	12	0.0708272	0.0770009	0.0921578	0.0928797	NA,Lrrc52	NA
1	171140000	171145000	1	171420000	171425000	.	.	.	.	0,0,0	36	1.87738	3.03302	3.70979	3.43707	2	4	5	5	4.00983e-24	1.66112e-18	1.28612e-15	1.01671e-15	NA,Mpz,Mpz,Sdhc,Mpz	NA,Usf1,Tstd1,Gm26641,Usf1,Usf1,Usf1
1	171539982	171544982	1	171674988	171679988	.	.	.	.	0,0,0	42	17.2176	17.8204	16.9012	16.9279	12	12	12	12	0.0708272	0.0770009	0.0921578	0.0928797	NA,Itln1	NA,Cd48,Cd48
1	179659988	179664988	1	179750017	179755017	.	.	.	.	0,0,0	34	15.6086	17.2918	11.771	16.4234	12	12	10	12	0.0708272	0.0770009	0.000166057	0.0928797	NA,Sccpdh	NA
1	184535005	184540005	1	184570020	184575020	.	.	.	.	0,0,0	34	18.9584	18.3451	18.3187	18.5739	12	12	12	12	0.0708272	0.0770009	0.0921578	0.0928797	NA	NA,1700112H15Rik
1	13225017	13230017	1	13364994	13369994	.	.	.	.	0,0,0	36	11.6465	11.8907	10.1337	15.0945	10	10	10	11	0.000722858	0.000680464	0.000834431	0.0183317	NA	NA,Ncoa2,Ncoa2
1	35690000	35695000	1	36055011	36060011	.	.	.	.	0,0,0	32	6.62243	6.3952	6.59612	8.82697	8	8	8	9	2.87141e-07	2.45511e-07	3.46143e-07	2.22427e-05	NA	NA,Hs6st1
1	36014988	36019988	1	36130017	36135017	.	.	.	.	0,0,0	32	6.90691	8.06905	10.1542	12.4284	8	9	10	11	2.87141e-07	1.6278e-05	0.000834431	0.0183317	NA	NA,Mir6897
1	43825005	43830005	1	43874988	43879988	.	.	.	.	0,0,0	50	9.97068	11.2849	12.6219	13.6872	10	10	11	11	0.000722858	0.000680464	0.0185848	0.0183317	NA,Uxs1	NA
1	62712493	62717493	1	62915013	62920013	.	.	.	.	0,0,0	34	7.56826	10.4608	11.217	12.9838	8	10	10	11	2.87141e-07	0.000680464	0.000834431	0.0183317	NA,Nrp2,Nrp2,Nrp2,Nrp2,Nrp2,Nrp2	NA
1	74584983	74589983	1	74660011	74665011	.	.	.	.	0,0,0	36	13.7165	13.8894	9.91324	7.63333	11	11	10	8	0.0152617	0.0157429	0.000834431	3.36413e-07	NA,Zfp142,Zfp142,Bcs1l,Rnf25,Stk36,Bcs1l,Rnf25	NA,Ttll4
1	84775011	84780011	1	84834994	84839994	.	.	.	.	0,0,0	60	11.109	11.3853	9.88463	11.7941	10	10	10	10	0.000722858	0.000680464	0.000834431	0.000852571	NA	NA,Fbxo36,Trip12
1	90205000	90210000	1	90435008	90440008	.	.	.	.	0,0,0	40	10.5684	11.4218	15.3116	10.4944	10	10	11	10	0.000722858	0.000680464	0.0185848	0.000852571	NA,Ackr3,Ackr3	NA
1	93985005	93990005	1	94074999	94079999	.	.	.	.	0,0,0	38	11.4756	8.83123	10.4584	12.5542	10	9	10	11	0.000722858	1.6278e-05	0.000834431	0.0183317	NA,Gal3st2c	NA
1	130729989	130734989	1	130775010	130780010	.	.	.	.	0,0,0	52	12.9112	13.0505	14.3065	14.5529	11	11	11	11	0.0152617	0.0157429	0.0185848	0.0183317	NA,AA986860,Pfkfb2	NA,Gm28856
1	134504989	134509989	1	134569983	134574983	.	.	.	.	0,0,0	68	13.9916	15.5097	14.1906	13.6872	11	11	11	11	0.0152617	0.0157429	0.0185848	0.0183317	NA,Rabif	NA,Kdm5b
1	160947486	160952486	1	161170000	161175000	.	.	.	.	0,0,0	38	8.51478	9.60208	9.58207	12.1067	9	9	9	10	1.87223e-05	1.6278e-05	2.17487e-05	0.000852571	NA	NA,Tex50
1	166085000	166090000	1	166135000	166140000	.	.	.	.	0,0,0	32	12.0249	12.3059	9.50201	12.9017	10	10	9	11	0.000722858	0.000680464	2.17487e-05	0.0183317	NA	NA,Dusp27,Gpa33,Gpa33,Gpa33,Dusp27
1	171315001	171320001	1	171470011	171475011	.	.	.	.	0,0,0	34	11.3044	10.9354	12.6871	13.2143	10	10	11	11	0.000722858	0.000680464	0.0185848	0.0183317	NA,Dedd,Dedd,Dedd,Dedd,Dedd,Dedd	NA
1	191300010	191305010	1	191562494	191567494	.	.	.	.	0,0,0	34	14.8421	9.54708	10.6673	14.6054	11	9	10	11	0.0152617	1.6278e-05	0.000834431	0.0183317	NA	NA,Dtl,Ints7,Dtl,Ints7,Ints7
1	191312502	191317502	1	191392494	191397494	.	.	.	.	0,0,0	40	12.5598	11.1088	11.6443	8.08938	11	10	10	9	0.0152617	0.000680464	0.000834431	2.22427e-05	NA,Tmem206,Nenf	NA,Ppp2r5a
1	14305000	14310000	1	14460000	14465000	.	.	.	.	0,0,0	36	10.9281	9.12447	8.6958	12.3114	10	9	9	10	0.00312435	0.000118048	0.000145272	0.00366917	NA,Eya1,Eya1,Eya1	NA
1	16010005	16015005	1	16080010	16085010	.	.	.	.	0,0,0	30	12.0994	11.7823	11.9904	10.8318	10	10	10	10	0.00312435	0.00306124	0.00361511	0.00366917	NA	NA,4930444P10Rik,4930444P10Rik
1	33820002	33825002	1	33874997	33879997	.	.	.	.	0,0,0	42	13.2831	13.7298	12.3855	14.1569	11	11	11	11	0.0422094	0.044602	0.0513002	0.0509858	NA,Zfp451,Zfp451,Zfp451,Zfp451,Zfp451	NA
1	34679989	34684989	1	34785000	34790000	.	.	.	.	0,0,0	30	12.022	11.0359	10.1668	10.5365	10	10	10	10	0.00312435	0.00306124	0.00361511	0.00366917	NA	NA,Arhgef4
1	41189989	41194989	1	41245005	41250005	.	.	.	.	0,0,0	30	13.7483	13.8314	15.4857	11.2729	11	11	11	10	0.0422094	0.044602	0.0513002	0.00366917	NA,4930448I06Rik	NA
1	52804994	52809994	1	52844994	52849994	.	.	.	.	0,0,0	30	13.8621	12.6376	11.1411	15.1772	11	11	10	11	0.0422094	0.044602	0.00361511	0.0509858	NA,Inpp1	NA,Hibch
1	64034997	64039997	1	64115000	64120000	.	.	.	.	0,0,0	52	12.3927	12.5747	12.8382	14.5978	11	11	11	11	0.0422094	0.044602	0.0513002	0.0509858	NA,Mir6899	NA,Klf7
1	72875000	72880000	1	73040002	73045002	.	.	.	.	0,0,0	34	14.3416	11.0321	14.4362	9.253	11	10	11	9	0.0422094	0.00306124	0.0513002	0.000148993	NA,Igfbp5	NA
1	72884994	72889994	1	72970005	72975005	.	.	.	.	0,0,0	34	12.73	10.7449	14.4135	10.4338	11	10	11	10	0.0422094	0.00306124	0.0513002	0.00366917	NA,Igfbp5	NA
1	75120005	75125005	1	75197482	75202482	.	.	.	.	0,0,0	42	12.656	9.17155	8.96545	7.99065	11	9	9	9	0.0422094	0.000118048	0.000145272	0.000148993	NA,Slc23a3	NA,Atg9a,Glb1l,Stk16,Atg9a,Ankzf1,Stk16,Ankzf1,Stk16,Atg9a,Ankzf1,Ankzf1,Atg9a
1	79790005	79795005	1	79845015	79850015	.	.	.	.	0,0,0	30	13.6374	12.9109	13.1226	15.3562	11	11	11	11	0.0422094	0.044602	0.0513002	0.0509858	NA	NA,Serpine2
1	82837507	82842507	1	82902502	82907502	.	.	.	.	0,0,0	36	14.8821	15.0987	14.4944	14.2429	11	11	11	11	0.0422094	0.044602	0.0513002	0.0509858	NA,Agfg1,Agfg1,Agfg1	NA
1	85799994	85804994	1	85839989	85844989	.	.	.	.	0,0,0	58	13.295	12.0984	14.5922	10.9635	11	10	11	10	0.0422094	0.00306124	0.0513002	0.00366917	NA,Cab39,Cab39,Cab39	NA
1	88759990	88764990	1	88995009	89000009	.	.	.	.	0,0,0	30	12.1309	10.6546	14.6795	6.857	10	10	11	8	0.00312435	0.00306124	0.0513002	3.67606e-06	NA,Platr5	NA
1	92684995	92689995	1	92900000	92905000	.	.	.	.	0,0,0	34	11.2638	10.4728	12.1381	12.6481	10	10	10	11	0.00312435	0.00306124	0.00361511	0.0509858	NA	NA,Dusp28,5033417F24Rik,5033417F24Rik,Ankmy1,Ankmy1,Rnpepl1
1	95604999	95609999	1	95715000	95720000	.	.	.	.	0,0,0	30	10.3279	9.87561	11.114	8.11784	10	10	10	9	0.00312435	0.00306124	0.00361511	0.000148993	NA	NA,4930598F16Rik
1	126750009	126755009	1	126815009	126820009	.	.	.	.	0,0,0	36	2.51011	4.86783	6.19312	4.50378	4	6	7	6	2.75798e-14	5.74334e-10	5.82613e-08	4.75751e-10	NA	NA,Nckap5,Nckap5
1	161995005	162000005	1	162229986	162234986	.	.	.	.	0,0,0	56	9.84542	8.5778	12.9288	7.94995	9	9	11	9	0.000128464	0.000118048	0.0513002	0.000148993	NA,2810442N19Rik	NA,Dnm3os,Mir214,Mir199a-2
1	165794985	165799985	1	165894995	165899995	.	.	.	.	0,0,0	50	9.8798	12.1648	15.4937	11.5377	10	10	11	10	0.00312435	0.00306124	0.0513002	0.00366917	NA,Cd247,Cd247,Cd247,Cd247,Cd247	NA
1	170634995	170639995	1	170705014	170710014	.	.	.	.	0,0,0	34	11.1337	9.95419	10.7421	9.20118	10	10	10	9	0.00312435	0.00306124	0.00361511	0.000148993	NA,Olfml2b	NA
1	189691666	189696666	1	189968336	189973336	.	.	.	.	0,0,0	34	6.67813	7.15442	9.55838	7.5684	8	8	9	8	3.13776e-06	2.79224e-06	0.000145272	3.67606e-06	NA,Cenpf	NA
1	16614985	16619985	1	16735000	16740000	.	.	.	.	0,0,0	28	10.9547	11.3546	9.21477	10.4064	10	10	9	10	0.0115665	0.011802	0.000836743	0.0133797	NA,Ube2w,Ube2w,Ube2w,Ube2w	NA
1	40159984	40164984	1	40219991	40224991	.	.	.	.	0,0,0	50	5.18437	8.39571	4.76802	10.0017	7	9	6	10	7.79987e-07	0.000717831	1.18187e-08	0.0133797	NA	NA,Il1r1
1	43560009	43565009	1	43739995	43744995	.	.	.	.	0,0,0	28	8.78181	7.76207	7.58822	9.44486	9	8	8	9	0.000738383	2.69435e-05	3.37114e-05	0.000854993	NA	NA,1500015O10Rik
1	58419995	58424995	1	58494985	58499985	.	.	.	.	0,0,0	34	10.9404	10.307	10.5354	10.8196	10	10	10	10	0.0115665	0.011802	0.0132497	0.0133797	NA,Clk1,Clk1,Clk1	NA,Orc2,Orc2,Orc2
1	60115009	60120009	1	60234990	60239990	.	.	.	.	0,0,0	28	9.37624	11.3109	9.79991	11.3317	9	10	9	10	0.000738383	0.011802	0.000836743	0.0133797	NA,Carf,Carf	NA
1	73629986	73634986	1	73859995	73864995	.	.	.	.	0,0,0	30	8.63229	8.05171	11.1243	8.10178	9	9	10	9	0.000738383	0.000717831	0.0132497	0.000854993	NA	NA,Mir6351,6030407O03Rik
1	77315001	77320001	1	77505005	77510005	.	.	.	.	0,0,0	48	8.14301	6.38109	5.79288	10.5317	9	8	7	10	0.000738383	2.69435e-05	8.44304e-07	0.0133797	NA	NA,Mir6352,Epha4
1	92645000	92650000	1	92891666	92896666	.	.	.	.	0,0,0	34	11.7164	9.94041	10.4152	12.3458	10	10	10	10	0.0115665	0.011802	0.0132497	0.0133797	NA,Cops9,Cops9,Otos	NA,Dusp28,Ankmy1,Ankmy1
1	93632511	93637511	1	93799995	93804995	.	.	.	.	0,0,0	28	10.6909	9.43494	10.16	12.2473	10	9	10	10	0.0115665	0.000717831	0.0132497	0.0133797	NA,Stk25	NA,Ing5,Dtymk,Dtymk
1	127989990	127994990	1	128150000	128155000	.	.	.	.	0,0,0	30	10.6108	11.7137	9.37923	9.22153	10	10	9	9	0.0115665	0.011802	0.000836743	0.000854993	NA	NA,R3hdm1
1	150575013	150580013	1	151000009	151005009	.	.	.	.	0,0,0	28	5.38328	7.61657	6.17761	12.2841	7	8	7	10	7.79987e-07	2.69435e-05	8.44304e-07	0.0133797	NA	NA,Hmcn1
1	162005009	162010009	1	162175004	162180004	.	.	.	.	0,0,0	36	7.68538	9.91171	11.6349	8.36893	8	10	10	9	2.87841e-05	0.011802	0.0132497	0.000854993	NA,2810442N19Rik	NA
1	182804991	182809991	1	182950006	182955006	.	.	.	.	0,0,0	46	9.76136	11.298	11.7215	12.2741	9	10	10	10	0.000738383	0.011802	0.0132497	0.0133797	NA	NA,Tlr5
1	13244995	13249995	1	13364995	13369995	.	.	.	.	0,0,0	36	10.5632	9.49585	8.54266	12.2891	10	9	9	10	0.0359981	0.00361298	0.0039917	0.0412185	NA	NA,Ncoa2,Ncoa2
1	20815004	20820004	1	20885004	20890004	.	.	.	.	0,0,0	26	11.5247	10.4988	12.0494	10.9538	10	10	10	10	0.0359981	0.0378072	0.0409486	0.0412185	NA,Mcm3	NA,Paqr8,6720483E21Rik
1	25244986	25249986	1	25284991	25289991	.	.	.	.	0,0,0	26	8.80166	9.57924	12.1012	9.98923	9	9	10	10	0.00351298	0.00361298	0.0409486	0.0412185	NA	NA,Gm20172
1	39850004	39855004	1	39969995	39974995	.	.	.	.	0,0,0	30	9.18193	8.68418	7.63332	11.305	9	9	8	10	0.00351298	0.00361298	0.000244761	0.0412185	NA,1700066B17Rik	NA
1	42939995	42944995	1	42974995	42979995	.	.	.	.	0,0,0	42	9.92317	11.4385	11.1955	10.8113	10	10	10	10	0.0359981	0.0378072	0.0409486	0.0412185	NA,Gpr45	NA
1	59005000	59010000	1	59225004	59230004	.	.	.	.	0,0,0	26	9.86408	7.6027	10.0761	10.3265	10	8	10	10	0.0359981	0.000214713	0.0409486	0.0412185	NA	NA,Als2,Als2,Als2
1	72365008	72370008	1	72689986	72694986	.	.	.	.	0,0,0	30	7.66395	7.99709	9.03488	8.27726	8	9	9	9	0.000217023	0.00361298	0.0039917	0.00400034	NA	NA,Ankar,Ankar
1	74205000	74210000	1	74385004	74390004	.	.	.	.	0,0,0	38	9.26524	7.81888	11.502	7.76597	9	8	10	8	0.00351298	0.000214713	0.0409486	0.000247555	NA,Cxcr1,Mir1928	NA,Ctdsp1,Mir26b,Slc11a1
1	77010008	77015008	1	77512502	77517502	.	.	.	.	0,0,0	26	6.96409	6.84104	6.02847	9.04238	8	8	7	9	0.000217023	0.000214713	1.00269e-05	0.00400034	NA	NA,Epha4
1	91014987	91019987	1	91050008	91055008	.	.	.	.	0,0,0	52	11.0292	9.70561	11.1465	9.688	10	9	10	9	0.0359981	0.00361298	0.0409486	0.00400034	NA	NA,Lrrfip1,Lrrfip1,Lrrfip1
1	93539993	93544993	1	93640010	93645010	.	.	.	.	0,0,0	30	10.4436	11.7881	12.1187	10.2071	10	10	10	10	0.0359981	0.0378072	0.0409486	0.0412185	NA	NA,Stk25
1	97600004	97605004	1	97660004	97665004	.	.	.	.	0,0,0	26	11.2955	10.9588	11.2799	9.81248	10	10	10	9	0.0359981	0.0378072	0.0409486	0.00400034	NA	NA,D1Ertd622e,D1Ertd622e,D1Ertd622e,D1Ertd622e,D1Ertd622e
1	118620004	118625004	1	118759995	118764995	.	.	.	.	0,0,0	36	10.2174	8.97622	8.85671	11.4469	10	9	9	10	0.0359981	0.00361298	0.0039917	0.0412185	NA,Tfcp2l1	NA
1	125595004	125600004	1	125664999	125669999	.	.	.	.	0,0,0	26	11.4943	9.91287	8.60245	9.98149	10	10	9	10	0.0359981	0.0378072	0.0039917	0.0412185	NA	NA,Gpr39
1	132610008	132615008	1	132740000	132745000	.	.	.	.	0,0,0	32	10.2449	8.90084	9.86678	7.40796	10	9	10	8	0.0359981	0.00361298	0.0409486	0.000247555	NA	NA,Nfasc,Gm10538,Nfasc
1	133655002	133660002	1	133890012	133895012	.	.	.	.	0,0,0	30	8.39979	9.63092	9.87594	11.4898	9	9	10	10	0.00351298	0.00361298	0.0409486	0.0412185	NA,Zc3h11a,Zc3h11a,Zbed6,Zc3h11a	NA,Optc,Optc,Optc
1	135464993	135469993	1	135674992	135679992	.	.	.	.	0,0,0	42	10.0679	11.01	11.3382	11.5901	10	10	10	10	0.0359981	0.0378072	0.0409486	0.0412185	NA,Mir1231	NA
1	164005004	164010004	1	164180004	164185004	.	.	.	.	0,0,0	28	10.0266	8.90858	11.5722	9.36965	10	9	10	9	0.0359981	0.00361298	0.0409486	0.00400034	NA,BC055324,Mettl18,BC055324,Mettl18	NA
1	165775000	165780000	1	165999995	166004995	.	.	.	.	0,0,0	34	10.4165	6.91958	11.6282	6.17491	10	8	10	7	0.0359981	0.000214713	0.0409486	9.44824e-06	NA,Cd247,Creg1,Cd247,Cd247,Cd247,Creg1,Cd247	NA,Pou2f1,Pou2f1
1	168430000	168435000	1	168740000	168745000	.	.	.	.	0,0,0	30	8.83007	7.7015	6.8255	9.02066	9	8	8	9	0.00351298	0.000214713	0.000244761	0.00400034	NA,Pbx1,Pbx1,Pbx1,Pbx1	NA
1	182555004	182560004	1	182810012	182815012	.	.	.	.	0,0,0	42	7.70906	7.10366	10.7935	5.57306	8	8	10	7	0.000217023	0.000214713	0.0409486	9.44824e-06	NA,Capn8,Capn8	NA
1	189340000	189345000	1	189620004	189625004	.	.	.	.	0,0,0	28	6.43302	7.69132	7.29206	10.7989	8	8	8	10	0.000217023	0.000214713	0.000244761	0.0412185	NA,Kcnk2,Kcnk2,Kcnk2,Kcnk2	NA
1	192069991	192074991	1	192120008	192125008	.	.	.	.	0,0,0	26	11.9507	11.0244	11.0359	11.7306	10	10	10	10	0.0359981	0.0378072	0.0409486	0.0412185	NA	NA,Gm10516
1	5090012	5095012	1	5160004	5165004	.	.	.	.	0,0,0	26	9.53964	8.28617	7.73999	6.21833	9	9	8	7	0.0137964	0.0147084	0.00147685	9.10705e-05	NA,Atp6v1h,Atp6v1h	NA
1	40594986	40599986	1	40774991	40779991	.	.	.	.	0,0,0	32	6.21959	6.06863	5.83236	7.32791	7	7	7	8	8.85484e-05	8.88559e-05	9.42026e-05	0.00147889	NA	NA,Mfsd9
1	42470000	42475000	1	42690000	42695000	.	.	.	.	0,0,0	30	8.53797	8.18832	9.5519	9.17309	9	9	9	9	0.0137964	0.0147084	0.0154667	0.0154249	NA	NA,Pou3f3,Pantr1,2900092D14Rik
1	59240007	59245007	1	59487493	59492493	.	.	.	.	0,0,0	36	6.58008	6.02204	7.56122	6.03697	8	7	8	7	0.00131139	8.88559e-05	0.00147685	9.10705e-05	NA,Als2,Als2,Als2,Cdk15,Cdk15	NA,Fzd7
1	61649987	61654987	1	61755009	61760009	.	.	.	.	0,0,0	34	8.20283	7.55546	5.79448	7.49224	9	8	7	8	0.0137964	0.00138095	9.42026e-05	0.00147889	NA,Pard3b	NA
1	72459999	72464999	1	72710000	72715000	.	.	.	.	0,0,0	26	6.98664	5.77112	7.27376	6.65736	8	7	8	8	0.00131139	8.88559e-05	0.00147685	0.00147889	NA	NA,Ankar,Rpl37a,Ankar
1	85750008	85755008	1	85839991	85844991	.	.	.	.	0,0,0	34	9.22505	8.69999	8.29809	9.75676	9	9	9	9	0.0137964	0.0147084	0.0154667	0.0154249	NA,Mir8096	NA
1	149830004	149835004	1	150100000	150105000	.	.	.	.	0,0,0	32	9.05933	7.18021	8.04573	8.61518	9	8	9	9	0.0137964	0.00138095	0.0154667	0.0154249	NA	NA,Ptgs2os,Ptgs2
1	152899994	152904994	1	153330003	153335003	.	.	.	.	0,0,0	26	7.02087	8.36949	8.11124	6.4396	8	9	9	8	0.00131139	0.0147084	0.0154667	0.00147889	NA,Smg7,Smg7,Smg7,Smg7	NA,Lamc1
1	161745001	161750001	1	161869994	161874994	.	.	.	.	0,0,0	30	8.32438	7.01062	9.16175	5.2192	9	8	9	7	0.0137964	0.00138095	0.0154667	9.10705e-05	NA	NA,Suco,Suco,Suco,Suco,Suco
1	168489992	168494992	1	168575007	168580007	.	.	.	.	0,0,0	26	8.42619	8.75715	7.42304	9.55584	9	9	8	9	0.0137964	0.0147084	0.00147685	0.0154249	NA,Mir6348	NA
1	180262501	180267501	1	180547509	180552509	.	.	.	.	0,0,0	26	3.90541	4.33811	6.06211	4.6155	5	6	7	6	1.38402e-07	4.627e-06	9.42026e-05	3.63241e-06	NA,Psen2	NA
1	182220007	182225007	1	182410007	182415007	.	.	.	.	0,0,0	24	4.3225	5.09398	6.00808	4.69538	6	7	7	6	4.05494e-06	8.88559e-05	9.42026e-05	3.63241e-06	NA	NA,Trp53bp2
1	190390011	190395011	1	190584996	190589996	.	.	.	.	0,0,0	24	8.30512	8.35211	8.53049	6.57739	9	9	9	8	0.0137964	0.0147084	0.0154667	0.00147889	NA,Gm29678	NA
1	5100000	5105000	1	5900003	5905003	.	.	.	.	0,0,0	22	3.11701	2.92592	3.42719	4.3223	4	4	5	6	1.19538e-07	1.12385e-07	2.19098e-06	4.51999e-05	NA	NA,Npbwr1
1	11237501	11242501	1	11409996	11414996	.	.	.	.	0,0,0	22	4.76104	6.54773	8.2568	6.7128	6	8	9	8	4.84291e-05	0.00702475	0.0493812	0.00710092	NA	NA,A830018L16Rik,A830018L16Rik,A830018L16Rik,A830018L16Rik,A830018L16Rik
1	13679996	13684996	1	13755011	13760011	.	.	.	.	0,0,0	24	9.73738	8.57614	6.40226	9.73918	9	9	8	9	0.0450188	0.0482933	0.00703196	0.049304	NA,Xkr9	NA
1	13785000	13790000	1	14285000	14290000	.	.	.	.	0,0,0	22	3.95993	3.84197	7.93752	3.28656	6	5	9	5	4.84291e-05	3.27093e-06	0.0493812	1.9749e-06	NA,Gm5523	NA
1	15870007	15875007	1	16095005	16100005	.	.	.	.	0,0,0	26	6.13359	5.81741	9.08844	8.44785	7	7	9	9	0.000665805	0.000719886	0.0493812	0.049304	NA	NA,Rdh10,Rpl7,4930444P10Rik,4930444P10Rik
1	16515003	16520003	1	16724992	16729992	.	.	.	.	0,0,0	30	6.61505	6.74126	8.13144	8.19117	8	8	9	9	0.00629987	0.00702475	0.0493812	0.049304	NA,Stau2,Stau2,Stau2,Stau2	NA
1	21080005	21085005	1	21145006	21150006	.	.	.	.	0,0,0	36	6.1144	6.13424	4.49567	8.30093	7	7	6	9	0.000665805	0.000719886	4.80606e-05	0.049304	NA,Tram2	NA
1	21214998	21219998	1	21340000	21345000	.	.	.	.	0,0,0	24	6.72803	7.38148	6.13968	8.67289	8	8	7	9	0.00629987	0.00702475	0.000695252	0.049304	NA,Tmem14a,Tmem14a	NA,Khdc1a
1	23250003	23255003	1	23380000	23385000	.	.	.	.	0,0,0	22	7.29782	6.22164	4.96789	7.99127	8	7	7	9	0.00629987	0.000719886	0.000695252	0.049304	NA	NA,Ogfrl1
1	34649990	34654990	1	34860005	34865005	.	.	.	.	0,0,0	40	7.28797	7.38907	7.48437	6.73251	8	8	8	8	0.00629987	0.00702475	0.00703196	0.00710092	NA	NA,Plekhb2,Plekhb2,Plekhb2
1	42874992	42879992	1	42955007	42960007	.	.	.	.	0,0,0	28	6.55798	7.01294	7.27231	6.86517	8	8	8	8	0.00629987	0.00702475	0.00703196	0.00710092	NA	NA,Gpr45
1	54204996	54209996	1	54349988	54354988	.	.	.	.	0,0,0	22	6.93572	7.49409	7.80211	7.70543	8	8	8	8	0.00629987	0.00702475	0.00703196	0.00710092	NA,Hecw2,Hecw2	NA
1	55414990	55419990	1	55720010	55725010	.	.	.	.	0,0,0	52	6.48613	9.28501	9.84647	6.8117	8	9	9	8	0.00629987	0.0482933	0.0493812	0.00710092	NA,Plcl1	NA
1	63774994	63779994	1	64120003	64125003	.	.	.	.	0,0,0	30	5.24214	6.51867	7.45438	9.0955	7	8	8	9	0.000665805	0.00702475	0.00703196	0.049304	NA,4933402D24Rik	NA,Klf7
1	71650000	71655000	1	71999988	72004988	.	.	.	.	0,0,0	26	6.73512	7.13324	8.31438	9.29315	8	8	9	9	0.00629987	0.00702475	0.0493812	0.049304	NA,Fn1,Apol7d,Fn1,Fn1,Fn1,Fn1,Fn1,Fn1	NA,4933417E11Rik
1	79430007	79435007	1	79610000	79615000	.	.	.	.	0,0,0	26	7.37958	8.43876	8.36712	9.78332	8	9	9	9	0.00629987	0.0482933	0.0493812	0.049304	NA,Scg2,Scg2	NA
1	87174996	87179996	1	87290000	87295000	.	.	.	.	0,0,0	22	6.0064	6.96921	7.37021	7.1129	7	8	8	8	0.000665805	0.00702475	0.00703196	0.00710092	NA,Prss56,Chrnd	NA
1	91160007	91165007	1	91354988	91359988	.	.	.	.	0,0,0	30	8.12591	7.36546	6.93407	6.54413	9	8	8	8	0.0450188	0.00702475	0.00703196	0.00710092	NA	NA,Klhl30,Erfe
1	119684992	119689992	1	119899992	119904992	.	.	.	.	0,0,0	26	6.5792	7.4494	7.69721	8.25808	8	8	8	9	0.00629987	0.00702475	0.00703196	0.049304	NA	NA,Tmem177
1	129285013	129290013	1	129369998	129374998	.	.	.	.	0,0,0	30	6.81424	6.79942	7.18721	7.52311	8	8	8	8	0.00629987	0.00702475	0.00703196	0.00710092	NA,Thsd7b	NA
1	149879999	149884999	1	150094992	150099992	.	.	.	.	0,0,0	22	4.70813	6.97542	6.64212	8.3666	6	8	8	9	4.84291e-05	0.00702475	0.00703196	0.049304	NA	NA,Ptgs2os,Ptgs2
1	151475007	151480007	1	151740011	151745011	.	.	.	.	0,0,0	32	8.78598	8.11799	8.82565	5.95196	9	9	9	7	0.0450188	0.0482933	0.0493812	0.000691176	NA	NA,Edem3,Edem3,2810414N06Rik,2810414N06Rik,2810414N06Rik,Edem3
1	152934992	152939992	1	153415000	153420000	.	.	.	.	0,0,0	26	7.05234	7.52248	8.93704	7.93585	8	8	9	9	0.00629987	0.00702475	0.0493812	0.049304	NA	NA,E330020D12Rik,Shcbp1l
1	155304988	155309988	1	155544992	155549992	.	.	.	.	0,0,0	116	7.9462	7.59382	7.56514	7.14238	9	8	8	8	0.0450188	0.00702475	0.00703196	0.00710092	NA	NA,Acbd6,Acbd6,Acbd6
1	175935003	175940003	1	176219996	176224996	.	.	.	.	0,0,0	26	4.2435	3.4008	3.52864	3.66106	6	5	5	5	4.84291e-05	3.27093e-06	2.19098e-06	1.9749e-06	NA	NA,Pld5,Pld5,Pld5
1	182284996	182289996	1	182395007	182400007	.	.	.	.	0,0,0	38	9.07104	9.02526	9.04828	6.79889	9	9	9	8	0.0450188	0.0482933	0.0493812	0.00710092	NA,1700047M11Rik,Degs1,Degs1	NA,Trp53bp2
1	182575000	182580000	1	182885000	182890000	.	.	.	.	0,0,0	30	7.21961	9.13743	9.2492	9.08818	8	9	9	9	0.00629987	0.0482933	0.0493812	0.049304	NA,Capn8,Capn8	NA
1	182979999	182984999	1	183147509	183152509	.	.	.	.	0,0,0	32	2.50217	3.1437	8.4527	2.0459	4	5	9	3	1.19538e-07	3.27093e-06	0.0493812	1.50239e-09	NA	NA,Disp1
1	191905000	191910000	1	191989992	191994992	.	.	.	.	0,0,0	22	7.23159	5.55817	8.61945	6.26504	8	7	9	8	0.00629987	0.000719886	0.0493812	0.00710092	NA,Slc30a1,1700034H15Rik	NA,Mir3473c,Rd3
1	192190000	192195000	1	192314992	192319992	.	.	.	.	0,0,0	26	7.87034	8.65591	8.27646	6.63641	9	9	9	8	0.0450188	0.0482933	0.0493812	0.00710092	NA,Kcnh1,Kcnh1	NA
2	152767269	152772269	2	152825645	152830645	.	.	.	.	0,0,0	108	34.6071	33.8318	31.2881	54.6136	15	15	15	17	2.15349e-12	2.76401e-12	2.79945e-12	0.0015975	NA	NA,Bcl2l1,Bcl2l1,Bcl2l1,Bcl2l1,Bcl2l1,Bcl2l1
2	26187434	26192434	2	26222482	26227482	.	.	.	.	0,0,0	82	29.3355	37.0527	32.4176	37.0977	14	15	15	15	2.32466e-11	5.51252e-07	5.73186e-07	5.90371e-07	NA	NA,Qsox2,Qsox2
2	32495000	32500000	2	32530000	32535000	.	.	.	.	0,0,0	88	35.8311	43.1641	40.7906	33.2324	15	16	16	15	1.62885e-06	0.00297397	0.00315059	2.19066e-06	NA	NA,Fam102a
2	93367483	93372483	2	93402483	93407483	.	.	.	.	0,0,0	86	39.0439	41.0421	36.7997	48.3269	16	16	15	16	0.0023763	0.00297397	2.12902e-06	0.00336425	NA	NA,Gm13807
2	164919968	164924968	2	164955000	164960000	.	.	.	.	0,0,0	80	28.2486	23.7347	29.2815	24.9315	14	13	14	14	1.36296e-10	2.38201e-15	1.9786e-10	2.02391e-10	NA,Zfp335	NA,Slc12a5,Mmp9,Slc12a5,Slc12a5
2	132529990	132534990	2	132565000	132570000	.	.	.	.	0,0,0	92	29.4247	27.4639	36.1744	27.5561	14	14	15	14	3.9216e-09	4.92559e-09	2.52089e-05	5.94734e-09	NA	NA,Gpcpd1,Gpcpd1,Gpcpd1,Gpcpd1,Gpcpd1,Gpcpd1,Gpcpd1,Gpcpd1,Gpcpd1,Gpcpd1,Gpcpd1
2	26447499	26452499	2	26494972	26499972	.	.	.	.	0,0,0	76	36.4945	34.7286	37.8787	37.863	15	15	15	15	6.29043e-05	7.80087e-05	8.16251e-05	8.46979e-05	NA,Sec16a,0610009E02Rik,0610009E02Rik,0610009E02Rik	NA,Notch1,Gm35978
2	84675000	84680000	2	84710000	84715000	.	.	.	.	0,0,0	94	39.1708	33.6883	35.3091	36.7096	16	15	15	15	0.0881404	0.0006569	0.000716992	0.000740405	NA,Med19,Tmx2,Tmx2,Selenoh,Selenoh	NA,Clp1,Zdhhc5,Clp1
2	26227489	26232489	2	26272489	26277489	.	.	.	.	0,0,0	66	30.6076	29.1725	30.0067	29.0723	14	14	14	14	7.55894e-06	9.37923e-06	1.04601e-05	1.06657e-05	NA,Qsox2,Qsox2	NA
2	39010000	39015000	2	39057503	39062503	.	.	.	.	0,0,0	68	31.6563	27.9885	36.9565	30.5972	15	14	15	14	0.0036945	9.37923e-06	0.00489899	1.06657e-05	NA,Arpc5l,Rpl35,Wdr38	NA,Golga1,Golga1,Golga1
2	26297526	26302526	2	26352489	26357489	.	.	.	.	0,0,0	114	26.1625	25.3187	29.4336	25.0164	14	14	14	14	2.8116e-05	3.47663e-05	3.90146e-05	3.97569e-05	NA,Gpsm1,Ccdc187,Gpsm1	NA,Dnlz,Dnlz,Dnlz,Card9
2	31090000	31095000	2	31136233	31141233	.	.	.	.	0,0,0	68	28.347	32.8117	26.5925	35.0217	14	15	14	15	9.71061e-05	0.0213931	0.000135863	0.0264397	NA,Fnbp1	NA,Fnbp1,Fnbp1,Gpr107,D330023K18Rik,Fnbp1,Fnbp1,Fnbp1,Fnbp1
2	90540000	90545000	2	90575016	90580016	.	.	.	.	0,0,0	62	29.8828	29.7321	27.9538	32.6054	14	14	14	15	9.71061e-05	0.000119655	0.000135863	0.0264397	NA	NA,Ptprj
2	91195008	91200008	2	91235000	91240000	.	.	.	.	0,0,0	70	38.246	30.5725	30.3657	33.1227	15	14	14	15	0.0192299	0.000119655	0.000135863	0.0264397	NA,Acp2,Madd,Acp2,Nr1h3,Nr1h3,Madd,Nr1h3	NA,Ddb2,A330069E16Rik,Ddb2
2	93277495	93282495	2	93329979	93334979	.	.	.	.	0,0,0	70	30.2228	29.1548	32.3479	31.8858	14	14	15	15	9.71061e-05	0.000119655	0.0256062	0.0264397	NA	NA,Tspan18
2	109615031	109620031	2	109667524	109672524	.	.	.	.	0,0,0	62	19.7496	20.0171	20.9592	16.4725	13	13	13	12	1.0447e-07	1.05436e-07	1.48217e-07	4.11102e-11	NA	NA,Bdnf,Bdnf,Bdnf,Bdnf,Bdnf
2	131985015	131990015	2	132027492	132032492	.	.	.	.	0,0,0	74	27.1015	26.1632	29.999	28.5987	14	14	14	14	9.71061e-05	0.000119655	0.000135863	0.000138322	NA	NA,Rassf2,Rassf2
2	177321660	177326660	2	177501660	177506660	.	.	.	.	0,0,0	62	29.885	23.039	35.1881	26.4892	14	13	15	14	9.71061e-05	1.05436e-07	0.0256062	0.000138322	NA	NA,Gm14403
2	49570000	49575000	2	49615014	49620014	.	.	.	.	0,0,0	60	34.1608	35.6811	34.6873	38.2316	15	15	15	15	0.0402183	0.0441069	0.0533244	0.055271	NA	NA,Kif5c
2	51984963	51989963	2	52022536	52027536	.	.	.	.	0,0,0	60	29.7559	33.0322	36.4417	27.713	14	15	15	14	0.000315754	0.0441069	0.0533244	0.000448046	NA,Nmi,Nmi,Nmi	NA,Tnfaip6
2	131432492	131437492	2	131482464	131487464	.	.	.	.	0,0,0	88	24.8797	26.0511	34.9732	25.2602	14	14	15	14	0.000315754	0.000387068	0.0533244	0.000448046	NA	NA,Smox,Smox,Smox,Smox,Smox,Smox,Smox,Smox,Smox
2	165990009	165995009	2	166039985	166044985	.	.	.	.	0,0,0	76	32.1068	32.2484	32.1971	32.7705	15	15	15	15	0.0402183	0.0441069	0.0533244	0.055271	NA,Ncoa3	NA
2	167694986	167699986	2	167740041	167745041	.	.	.	.	0,0,0	74	27.9477	26.7538	35.41	24.2704	14	14	15	13	0.000315754	0.000387068	0.0533244	7.49769e-07	NA,Cebpb,Cebpb,A530013C23Rik,Cebpb,A530013C23Rik	NA
2	29190020	29195020	2	29237513	29242513	.	.	.	.	0,0,0	68	30.2022	28.4313	22.3508	29.0924	14	14	13	14	0.000956817	0.00118414	3.67658e-06	0.00137378	NA	NA,Ntng2,Ntng2,Ntng2,6530402F18Rik
2	28752531	28757531	2	28837468	28842468	.	.	.	.	0,0,0	56	22.8997	23.0463	28.4618	20.3304	13	13	14	13	1.15321e-05	1.21293e-05	0.00385165	1.61125e-05	NA	NA,Ddx31,Gtf3c4,Gtf3c4,Ddx31
2	90476663	90481663	2	90576656	90581656	.	.	.	.	0,0,0	68	18.2472	18.0237	29.1524	17.8554	12	12	14	12	1.40341e-08	1.23176e-08	0.00385165	1.78741e-08	NA,Ptprj	NA,Ptprj
2	128077500	128082500	2	128119987	128124987	.	.	.	.	0,0,0	72	30.2405	26.1377	28.7775	30.149	14	14	14	14	0.00268484	0.0032834	0.00385165	0.00385202	NA	NA,Bcl2l11,Bcl2l11,Bcl2l11,Bcl2l11,Bcl2l11
2	165075000	165080000	2	165110000	165115000	.	.	.	.	0,0,0	66	27.6918	30.7385	30.1838	28.7629	14	14	14	14	0.00268484	0.0032834	0.00385165	0.00385202	NA,1700025C18Rik	NA
2	80577505	80582505	2	80637494	80642494	.	.	.	.	0,0,0	54	22.6453	22.9242	18.0664	29.3227	13	13	12	14	4.76276e-05	5.0634e-05	1.20339e-07	0.0100593	NA,Nckap1,Nckap1,Nckap1,Nckap1	NA,Nup35,Mir684-1,Nup35
2	155669986	155674986	2	155755008	155760008	.	.	.	.	0,0,0	66	19.3362	20.6826	18.6275	28.1077	12	13	12	14	9.15139e-08	5.0634e-05	1.20339e-07	0.0100593	NA	NA,Procr
2	144469989	144474989	2	144505005	144510005	.	.	.	.	0,0,0	52	26.6466	26.4183	28.0052	29.5368	14	14	14	14	0.0171209	0.0202867	0.0242977	0.024324	NA,Zfp133-ps,Gm38402	NA
2	166910020	166915020	2	166947515	166952515	.	.	.	.	0,0,0	64	20.5683	21.1433	19.1222	23.6765	13	13	12	13	0.000179309	0.00019367	7.20484e-07	0.000255018	NA,Cse1l	NA,Stau1
2	168766652	168771652	2	168871682	168876682	.	.	.	.	0,0,0	62	21.8454	21.5898	29.2962	23.6971	13	13	14	13	0.000179309	0.00019367	0.0242977	0.000255018	NA,Sall4,Sall4,Sall4	NA
2	6122509	6127509	2	6162504	6167504	.	.	.	.	0,0,0	70	27.0627	25.6461	23.6977	26.0869	14	14	13	14	0.0381449	0.0444927	0.000899735	0.0540063	NA,Gm10857,Proser2,Proser2,Gm10857	NA
2	30125009	30130009	2	30262504	30267504	.	.	.	.	0,0,0	50	18.1636	23.1838	22.3747	27.4257	12	13	13	14	3.0288e-06	0.000684552	0.000899735	0.0540063	NA,Tbc1d13,Zer1,Zer1	NA,Phyhd1,Phyhd1,Phyhd1,Phyhd1,Phyhd1
2	32815009	32820009	2	32854999	32859999	.	.	.	.	0,0,0	50	22.707	23.5248	22.5514	26.8587	13	13	13	14	0.000624846	0.000684552	0.000899735	0.0540063	NA	NA,Stxbp1,Stxbp1
2	35299997	35304997	2	35340013	35345013	.	.	.	.	0,0,0	98	23.6809	26.4902	28.2342	25.351	13	14	14	14	0.000624846	0.0444927	0.0539207	0.0540063	NA	NA,Stom
2	51930004	51935004	2	52042485	52047485	.	.	.	.	0,0,0	50	11.8602	10.9756	12.3827	11.8512	10	10	11	10	4.1614e-12	2.81e-12	6.27638e-09	4.96663e-12	NA,Rbm43,Rbm43,Rbm43,Rbm43,Rbm43,Rbm43,Rbm43	NA,Tnfaip6
2	101597485	101602485	2	101642523	101647523	.	.	.	.	0,0,0	50	21.1083	22.7817	24.9238	19.0831	13	13	14	12	0.000624846	0.000684552	0.0539207	3.89698e-06	NA	NA,Rag1
2	117043336	117048336	2	117110019	117115019	.	.	.	.	0,0,0	50	20.4133	20.4502	24.3312	21.5061	13	13	13	13	0.000624846	0.000684552	0.000899735	0.000891467	NA	NA,Spred1,Spred1
2	131085012	131090012	2	131159996	131164996	.	.	.	.	0,0,0	66	18.446	20.3082	21.2903	26.4173	12	13	13	14	3.0288e-06	0.000684552	0.000899735	0.0540063	NA,Siglec1	NA,Spef1,1700037H04Rik,1700037H04Rik,1700037H04Rik,1700037H04Rik,1700037H04Rik
2	132574990	132579990	2	132654981	132659981	.	.	.	.	0,0,0	56	17.7813	21.7449	29.9152	21.0663	12	13	14	13	3.0288e-06	0.000684552	0.0539207	0.000891467	NA,Gpcpd1,Gpcpd1,Gpcpd1,Gpcpd1,Gpcpd1,Gpcpd1,Gpcpd1,Gpcpd1,Gpcpd1,Gpcpd1,Gpcpd1	NA
2	145850013	145855013	2	145887518	145892518	.	.	.	.	0,0,0	60	29.7415	29.0366	26.3825	30.0991	14	14	14	14	0.0381449	0.0444927	0.0539207	0.0540063	NA	NA,Naa20,Naa20
2	156179981	156184981	2	156245018	156250018	.	.	.	.	0,0,0	50	26.7339	28.8669	29.7932	30.1466	14	14	14	14	0.0381449	0.0444927	0.0539207	0.0540063	NA,Rbm39,Phf20,Rbm39,Rbm39,Rbm39,Rbm39,Rbm39,Rbm39,Rbm39,Rbm39,Rbm39	NA
2	156612495	156617495	2	156700009	156705009	.	.	.	.	0,0,0	50	16.5115	16.3477	17.5506	23.6085	12	12	12	13	3.0288e-06	2.8171e-06	3.96515e-06	0.000891467	NA,Dlgap4,Dlgap4,Dlgap4,Gm14169	NA
2	164952522	164957522	2	165027504	165032504	.	.	.	.	0,0,0	60	22.0894	23.3842	24.7089	28.1498	13	13	14	14	0.000624846	0.000684552	0.0539207	0.0540063	NA,Slc12a5,Mmp9,Slc12a5,Slc12a5	NA,Ncoa5
2	165527495	165532495	2	165589990	165594990	.	.	.	.	0,0,0	58	24.205	24.2095	28.2756	29.5296	13	13	14	14	0.000624846	0.000684552	0.0539207	0.0540063	NA	NA,Eya2
2	166352486	166357486	2	166440000	166445000	.	.	.	.	0,0,0	50	19.0575	19.6993	24.5894	24.4999	12	13	13	13	3.0288e-06	0.000684552	0.000899735	0.000891467	NA	NA,5031425F14Rik
2	25780000	25785000	2	25819991	25824991	.	.	.	.	0,0,0	50	22.4874	22.9323	23.3899	18.7162	13	13	13	12	0.00199232	0.0022036	0.00288377	1.99038e-05	NA,Gm13539,Lcn11	NA,Glt6d1,Lcn9
2	25974973	25979973	2	26014982	26019982	.	.	.	.	0,0,0	60	19.1221	18.0873	16.7838	15.5909	12	12	12	12	1.5342e-05	1.46372e-05	2.00658e-05	1.99038e-05	NA,Camsap1,Camsap1,Camsap1	NA,Ubac1,Ubac1
2	28754995	28759995	2	28905004	28910004	.	.	.	.	0,0,0	48	17.1265	17.0887	22.6705	15.9489	12	12	13	12	1.5342e-05	1.46372e-05	0.00288377	1.99038e-05	NA	NA,Barhl1,Barhl1,Barhl1,Barhl1
2	84859982	84864982	2	84894991	84899991	.	.	.	.	0,0,0	58	17.0768	20.6344	24.1601	18.7876	12	13	13	12	1.5342e-05	0.0022036	0.00288377	1.99038e-05	NA	NA,Rtn4rl2
2	121240017	121245017	2	121432495	121437495	.	.	.	.	0,0,0	48	14.5313	11.2666	14.2279	17.0144	11	10	11	12	4.42902e-08	3.60598e-11	5.00458e-08	1.99038e-05	NA	NA,Serf2,Ell3,Serf2,Serf2
2	166438331	166443331	2	166553331	166558331	.	.	.	.	0,0,0	54	21.6734	14.9539	11.698	18.0165	13	11	10	12	0.00199232	3.43239e-08	6.21745e-11	1.99038e-05	NA,5031425F14Rik	NA,Gm29679
2	168688330	168693330	2	168743330	168748330	.	.	.	.	0,0,0	70	21.7685	21.6736	22.6274	23.5862	13	13	13	13	0.00199232	0.0022036	0.00288377	0.00286254	NA	NA,Atp9a,Atp9a,Atp9a
2	173264991	173269991	2	173350000	173355000	.	.	.	.	0,0,0	50	17.2488	20.0132	18.9227	18.6835	12	13	12	12	1.5342e-05	0.0022036	2.00658e-05	1.99038e-05	NA,Pmepa1	NA
2	181720000	181725000	2	181797504	181802504	.	.	.	.	0,0,0	62	20.271	20.5098	21.0082	19.9959	13	13	13	13	0.00199232	0.0022036	0.00288377	0.00286254	NA,Oprl1,Oprl1,Oprl1,Oprl1,Oprl1,Oprl1,Oprl1,Oprl1,Oprl1	NA,Myt1
2	5339983	5344983	2	5375016	5380016	.	.	.	.	0,0,0	46	22.9257	22.206	22.1923	22.362	13	13	13	13	0.0057497	0.00644834	0.00827338	0.00826849	NA	NA,Mir466d
2	35456638	35461638	2	35508335	35513335	.	.	.	.	0,0,0	62	20.054	20.0387	22.5976	21.0561	13	13	13	13	0.0057497	0.00644834	0.00827338	0.00826849	NA,Ggta1,Ggta1,Ggta1,Ggta1	NA
2	90629991	90634991	2	90674987	90679987	.	.	.	.	0,0,0	46	19.9915	17.5397	19.2791	14.7612	13	12	12	11	0.0057497	6.90113e-05	9.24471e-05	3.63184e-07	NA	NA,Nup160
2	91324991	91329991	2	91452479	91457479	.	.	.	.	0,0,0	60	14.6861	19.7663	17.6988	24.2469	11	13	12	13	3.21072e-07	0.00644834	9.24471e-05	0.00826849	NA	NA,Lrp4,Lrp4,1110051M20Rik,1110051M20Rik
2	115515995	115520995	2	115852998	115857998	.	.	.	.	0,0,0	50	9.08483	7.10283	8.33798	9.41109	9	8	9	9	6.711e-13	2.77774e-16	7.61343e-13	7.83931e-13	NA,3110099E03Rik	NA
2	155702498	155707498	2	155753760	155758760	.	.	.	.	0,0,0	50	16.0348	20.92	24.2774	22.6605	12	13	13	13	7.0485e-05	0.00644834	0.00827338	0.00826849	NA,Trpc4ap,Trpc4ap	NA,Procr
2	156871669	156876669	2	157083348	157088348	.	.	.	.	0,0,0	46	16.7287	19.0824	19.6513	18.5812	12	12	13	12	7.0485e-05	6.90113e-05	0.00827338	9.20132e-05	NA,5430405H02Rik,5430405H02Rik,Rab5if,Sla2,Sla2	NA,Soga1,Tldc2
2	157219996	157224996	2	157264984	157269984	.	.	.	.	0,0,0	46	18.8208	19.6841	19.049	20.295	12	13	12	13	7.0485e-05	0.00644834	9.24471e-05	0.00826849	NA	NA,Rpn2,Rpn2,Rpn2,Rpn2,Mroh8
2	168544986	168549986	2	168585003	168590003	.	.	.	.	0,0,0	58	18.8767	20.4672	21.6376	21.4545	12	13	13	13	7.0485e-05	0.00644834	0.00827338	0.00826849	NA	NA,Nfatc2,Nfatc2,Nfatc2,Nfatc2,Nfatc2,Nfatc2,Nfatc2,Nfatc2,Nfatc2,Nfatc2,Nfatc2,Nfatc2,Nfatc2,Nfatc2,Nfatc2,Nfatc2,Nfatc2,Nfatc2
2	18065023	18070023	2	18139992	18144992	.	.	.	.	0,0,0	44	19.73	20.6346	23.9413	22.5747	13	13	13	13	0.0152065	0.017148	0.0217121	0.0219071	NA,Mllt10,Mllt10,Mir7655,Mllt10,Mllt10,Mllt10,Mllt10	NA
2	27882519	27887519	2	27962496	27967496	.	.	.	.	0,0,0	48	14.8145	14.8346	13.6925	21.601	11	11	11	13	2.12549e-06	1.73377e-06	2.44656e-06	0.0219071	NA,Col5a1	NA
2	49785011	49790011	2	49839984	49844984	.	.	.	.	0,0,0	52	19.6599	19.2789	19.3227	21.1264	13	12	12	13	0.0152065	0.000295744	0.000389273	0.0219071	NA,Lypd6b	NA
2	118817526	118822526	2	118872503	118877503	.	.	.	.	0,0,0	58	17.9539	19.9324	19.137	22.9957	12	13	12	13	0.000293111	0.017148	0.000389273	0.0219071	NA,Knstrn	NA,Ivd
2	120102500	120107500	2	120142503	120147503	.	.	.	.	0,0,0	72	19.0592	24.4712	20.6214	22.6757	12	13	13	13	0.000293111	0.017148	0.0217121	0.0219071	NA	NA,Ehd4
2	129547525	129552525	2	129640007	129645007	.	.	.	.	0,0,0	44	13.4238	16.6601	15.4008	19.9677	11	12	11	13	2.12549e-06	0.000295744	2.44656e-06	0.0219071	NA,F830045P16Rik	NA
2	131047511	131052511	2	131157477	131162477	.	.	.	.	0,0,0	46	17.337	17.805	21.211	18.7952	12	12	13	12	0.000293111	0.000295744	0.0217121	0.000387596	NA,Adam33,Adam33,Gfra4,Gfra4,Gfra4,Mir6973b,Gfra4,Adam33	NA,Spef1,1700037H04Rik,1700037H04Rik,1700037H04Rik,1700037H04Rik,1700037H04Rik
2	131350002	131355002	2	131414988	131419988	.	.	.	.	0,0,0	74	24.212	22.6165	24.4947	23.3448	13	13	13	13	0.0152065	0.017148	0.0217121	0.0219071	NA,Rnf24	NA
2	134795000	134800000	2	134830000	134835000	.	.	.	.	0,0,0	44	16.6866	20.6056	24.1232	18.1381	12	13	13	12	0.000293111	0.017148	0.0217121	0.000387596	NA,Plcb1,Plcb1	NA
2	135661247	135666247	2	135919992	135924992	.	.	.	.	0,0,0	52	20.5129	21.3468	21.2705	23.5034	13	13	13	13	0.0152065	0.017148	0.0217121	0.0219071	NA,Plcb4,Plcb4,Plcb4,Plcb4	NA
2	151507503	151512503	2	151552518	151557518	.	.	.	.	0,0,0	58	14.8315	14.2139	15.6089	11.9084	11	11	12	10	2.12549e-06	1.73377e-06	0.000389273	7.19305e-09	NA	NA,Fkbp1a,Fkbp1a,Fkbp1a,Fkbp1a,Fkbp1a,Fkbp1a,Fkbp1a,Fkbp1a
2	152784988	152789988	2	152834979	152839979	.	.	.	.	0,0,0	108	22.6239	23.4383	22.2161	21.3366	13	13	13	13	0.0152065	0.017148	0.0217121	0.0219071	NA	NA,Bcl2l1,Tpx2,Bcl2l1,Bcl2l1,Bcl2l1,Tpx2,Tpx2,Tpx2,Tpx2,Bcl2l1,Bcl2l1
2	19660000	19665000	2	19715014	19720014	.	.	.	.	0,0,0	42	22.5845	20.3028	16.913	23.0863	13	13	12	13	0.0365944	0.0411484	0.00146086	0.0521681	NA,Gm3230,Otud1	NA
2	22959985	22964985	2	23029978	23034978	.	.	.	.	0,0,0	42	15.7629	17.6273	17.9186	24.3416	12	12	12	13	0.00109074	0.00113134	0.00146086	0.0521681	NA	NA,Abi1,Abi1,Abi1,Abi1,Abi1,Abi1,Abi1,Abi1
2	25660021	25665021	2	25900014	25905014	.	.	.	.	0,0,0	42	14.9623	15.6825	19.4345	16.688	11	12	12	12	1.24015e-05	0.00113134	0.00146086	0.00144164	NA,Lcn5,Lcn6,Lcn5,Lcn8,Lcn6,Lcn5	NA
2	72985018	72990018	2	73035006	73040006	.	.	.	.	0,0,0	46	21.5843	21.526	24.2143	23.1261	13	13	13	13	0.0365944	0.0411484	0.0516631	0.0521681	NA,Sp3,Sp3os,Sp3	NA
2	104884986	104889986	2	105185006	105190006	.	.	.	.	0,0,0	42	7.23665	8.5485	11.9836	8.7144	8	9	10	9	2.39267e-13	1.10418e-10	6.6567e-08	1.81045e-10	NA,Ccdc73	NA
2	117121665	117126665	2	117226667	117231667	.	.	.	.	0,0,0	48	16.5012	12.7961	15.5756	14.134	12	11	12	11	0.00109074	1.04956e-05	0.00146086	1.43615e-05	NA,Spred1,Spred1	NA
2	117279993	117284993	2	117339979	117344979	.	.	.	.	0,0,0	42	17.0909	18.1466	16.9237	19.5588	12	12	12	12	0.00109074	0.00113134	0.00146086	0.00144164	NA	NA,Rasgrp1
2	121025000	121030000	2	121110000	121115000	.	.	.	.	0,0,0	50	20.6302	19.683	18.5777	23.3836	13	13	12	13	0.0365944	0.0411484	0.00146086	0.0521681	NA,Epb42	NA,Tgm7
2	130665013	130670013	2	130725000	130730000	.	.	.	.	0,0,0	60	22.6799	23.0445	21.2569	18.0261	13	13	13	12	0.0365944	0.0411484	0.0516631	0.00144164	NA,Ddrgk1,Itpa,Itpa	NA
2	131092498	131097498	2	131140024	131145024	.	.	.	.	0,0,0	66	16.5633	18.1707	20.6628	22.4481	12	12	13	13	0.00109074	0.00113134	0.0516631	0.0521681	NA,Siglec1	NA
2	131279993	131284993	2	131322525	131327525	.	.	.	.	0,0,0	42	20.7955	23.6391	23.367	21.3744	13	13	13	13	0.0365944	0.0411484	0.0516631	0.0521681	NA,Mir103-2	NA
2	158658994	158663994	2	158737004	158742004	.	.	.	.	0,0,0	54	19.0964	20.2884	21.7234	22.9174	12	13	13	13	0.00109074	0.0411484	0.0516631	0.0521681	NA,Ppp1r16b,Ppp1r16b	NA
2	163455000	163460000	2	163499986	163504986	.	.	.	.	0,0,0	42	23.4063	22.9002	20.7118	23.9622	13	13	13	13	0.0365944	0.0411484	0.0516631	0.0521681	NA	NA,R3hdml,Hnf4a,Hnf4a
2	164003328	164008328	2	164055016	164060016	.	.	.	.	0,0,0	42	18.7793	16.6285	18.1868	12.5818	12	12	12	11	0.00109074	0.00113134	0.00146086	1.43615e-05	NA,Ywhab	NA,Tomm34,Tomm34
2	167685006	167690006	2	167767483	167772483	.	.	.	.	0,0,0	50	22.6942	18.1394	24.3551	12.7998	13	12	13	11	0.0365944	0.00113134	0.0516631	1.43615e-05	NA,Cebpb,Cebpb,A530013C23Rik,Cebpb,A530013C23Rik	NA
2	19559980	19564980	2	19608328	19613328	.	.	.	.	0,0,0	42	13.1296	16.4854	18.6978	12.0112	11	12	12	10	6.52467e-05	0.00388347	0.0048989	5.83388e-07	NA,4921504E06Rik	NA
2	30469993	30474993	2	30804982	30809982	.	.	.	.	0,0,0	62	13.5392	16.8165	17.6707	16.3098	11	12	12	12	6.52467e-05	0.00388347	0.0048989	0.0048709	NA,Ier5l	NA,Ntmt1,Ntmt1,Ntmt1,1700001O22Rik,1700001O22Rik,1700001O22Rik,Ntmt1,Ntmt1,Ntmt1,Ntmt1,Ntmt1
2	38500000	38505000	2	38591644	38596644	.	.	.	.	0,0,0	46	18.0129	18.0374	18.472	19.4656	12	12	12	12	0.00368742	0.00388347	0.0048989	0.0048709	NA,Nek6,Nek6	NA
2	50075000	50080000	2	50170006	50175006	.	.	.	.	0,0,0	40	16.4625	16.6863	17.0655	16.313	12	12	12	12	0.00368742	0.00388347	0.0048989	0.0048709	NA,Lypd6,Lypd6	NA
2	76257500	76262500	2	76349996	76354996	.	.	.	.	0,0,0	44	18.5224	17.5353	16.6084	18.4908	12	12	12	12	0.00368742	0.00388347	0.0048989	0.0048709	NA	NA,Cyct,Pde11a
2	111874999	111879999	2	111910000	111915000	.	.	.	.	0,0,0	42	11.5146	14.0942	14.8692	9.41626	10	11	11	9	4.90633e-07	5.79125e-05	7.84691e-05	2.43449e-09	NA,Olfr1305	NA,Olfr1306
2	122245006	122250006	2	122290015	122295015	.	.	.	.	0,0,0	42	20.3609	19.4206	17.1769	17.2479	13	12	12	12	0.0800953	0.00388347	0.0048989	0.0048709	NA,Sord	NA,Duoxa2,Duox2
2	164249993	164254993	2	164324993	164329993	.	.	.	.	0,0,0	40	10.4142	11.7538	13.6293	12.7373	10	10	11	11	4.90633e-07	3.88536e-07	7.84691e-05	7.78082e-05	NA,Svs2,Svs3b	NA,Svs5,Svs6
2	18590011	18595011	2	18669993	18674993	.	.	.	.	0,0,0	44	13.5433	12.2021	13.9982	11.589	11	10	11	10	0.000309348	3.05739e-06	0.00037403	4.3412e-06	NA	NA,Bmi1,Commd3
2	19267503	19272503	2	19337509	19342509	.	.	.	.	0,0,0	38	17.5165	16.372	18.7017	14.7064	12	12	12	11	0.0111176	0.0119182	0.0147779	0.00037049	NA	NA,4930447M23Rik
2	26921238	26926238	2	27023735	27028735	.	.	.	.	0,0,0	44	14.1283	11.9968	9.30599	15.7168	11	10	9	12	0.000309348	3.05739e-06	2.92834e-08	0.0147251	NA,Surf1,Med22,Surf1,Surf2,Surf1,Surf4,Rpl7a,Stkld1,Med22	NA,Slc2a6,Slc2a6
2	33024999	33029999	2	33129992	33134992	.	.	.	.	0,0,0	58	16.0298	16.5527	18.4993	18.1379	12	12	12	12	0.0111176	0.0119182	0.0147779	0.0147251	NA	NA,Garnl3,Garnl3
2	70274980	70279980	2	70470005	70475005	.	.	.	.	0,0,0	42	13.0386	16.3791	17.9941	18.3563	11	12	12	12	0.000309348	0.0119182	0.0147779	0.0147251	NA	NA,Sp5
2	72987494	72992494	2	73055005	73060005	.	.	.	.	0,0,0	46	16.7874	15.8948	16.3435	16.4171	12	12	12	12	0.0111176	0.0119182	0.0147779	0.0147251	NA,Sp3,Sp3os,Sp3	NA
2	90914994	90919994	2	91007508	91012508	.	.	.	.	0,0,0	38	14.6731	14.6611	14.9544	15.4223	11	11	11	11	0.000309348	0.000287016	0.00037403	0.00037049	NA,Kbtbd4,Kbtbd4,Kbtbd4,Ptpmt1,Ndufs3	NA
2	101898341	101903341	2	102071680	102076680	.	.	.	.	0,0,0	42	16.2359	12.9085	18.448	11.9872	12	11	12	10	0.0111176	0.000287016	0.0147779	4.3412e-06	NA,Commd9	NA
2	104785000	104790000	2	104825011	104830011	.	.	.	.	0,0,0	38	14.9154	15.2916	17.731	10.5504	11	11	12	10	0.000309348	0.000287016	0.0147779	4.3412e-06	NA	NA,Qser1
2	152025000	152030000	2	152100011	152105011	.	.	.	.	0,0,0	82	15.1136	13.6995	15.6635	13.6277	11	11	12	11	0.000309348	0.000287016	0.0147779	0.00037049	NA	NA,Srxn1
2	167220001	167225001	2	167417499	167422499	.	.	.	.	0,0,0	42	12.7961	13.628	18.2806	15.3102	11	11	12	11	0.000309348	0.000287016	0.0147779	0.00037049	NA	NA,Slc9a8,Slc9a8,Slc9a8,Slc9a8
2	170729999	170734999	2	170850002	170855002	.	.	.	.	0,0,0	60	13.1179	14.8801	16.0379	14.9963	11	11	12	11	0.000309348	0.000287016	0.0147779	0.00037049	NA,Dok5,Dok5	NA
2	173739988	173744988	2	173785005	173790005	.	.	.	.	0,0,0	38	14.0111	14.253	15.7595	18.2736	11	11	12	12	0.000309348	0.000287016	0.0147779	0.0147251	NA,Vapb	NA
2	19550000	19555000	2	19655000	19660000	.	.	.	.	0,0,0	36	10.4176	11.429	10.593	12.8933	10	10	10	11	2.46826e-05	2.10581e-05	2.8219e-05	0.00154596	NA,4921504E06Rik	NA,Gm3230,Otud1
2	30485011	30490011	2	30582486	30587486	.	.	.	.	0,0,0	40	14.6612	14.9384	16.5369	17.17	11	11	12	12	0.00129874	0.00125832	0.0390663	0.0392094	NA,Ier5l	NA,Cstad
2	31480011	31485011	2	31569994	31574994	.	.	.	.	0,0,0	56	17.1324	17.1897	18.3993	15.902	12	12	12	12	0.0296973	0.0322078	0.0390663	0.0392094	NA,Ass1,Gm5424	NA,Fubp3,Fubp3,Fubp3,Fubp3,Fubp3
2	34414994	34419994	2	34455000	34460000	.	.	.	.	0,0,0	56	17.1691	18.0219	19.5566	18.6651	12	12	12	12	0.0296973	0.0322078	0.0390663	0.0392094	NA,Mapkap1,Mapkap1,Mapkap1,Mapkap1,Mapkap1,Mapkap1	NA
2	34869994	34874994	2	34909989	34914989	.	.	.	.	0,0,0	42	17.9149	17.0026	19.1807	12.5785	12	12	12	11	0.0296973	0.0322078	0.0390663	0.00154596	NA,Psmd5,Cutal,Cutal,Psmd5	NA,Phf19
2	34870002	34875002	2	34967497	34972497	.	.	.	.	0,0,0	50	8.57461	9.71897	8.59796	19.1022	9	9	9	12	2.50448e-07	1.99826e-07	3.01536e-07	0.0392094	NA,Psmd5,Cutal,Cutal,Psmd5	NA,Traf1,Traf1
2	45043312	45048312	2	45101669	45106669	.	.	.	.	0,0,0	52	13.1852	12.4212	13.9071	12.8054	11	11	11	11	0.00129874	0.00125832	0.00157772	0.00154596	NA	NA,Zeb2,Zeb2,Zeb2os,Zeb2os,Zeb2,Zeb2,Zeb2,Zeb2,Zeb2
2	48702497	48707497	2	48805005	48810005	.	.	.	.	0,0,0	36	13.4575	13.3112	12.5919	13.5651	11	11	11	11	0.00129874	0.00125832	0.00157772	0.00154596	NA	NA,Acvr2a
2	62357502	62362502	2	62407491	62412491	.	.	.	.	0,0,0	50	15.367	14.9651	19.2744	11.3853	11	11	12	10	0.00129874	0.00125832	0.0390663	2.91867e-05	NA	NA,Dpp4,Dpp4
2	78876664	78881664	2	78919989	78924989	.	.	.	.	0,0,0	36	14.7029	14.2719	16.4275	16.8078	11	11	12	12	0.00129874	0.00125832	0.0390663	0.0392094	NA,Ube2e3,Ube2e3,Ube2e3,Ube2e3	NA
2	105069989	105074989	2	105124994	105129994	.	.	.	.	0,0,0	40	16.1785	16.307	16.2184	13.7875	12	12	12	11	0.0296973	0.0322078	0.0390663	0.00154596	NA	NA,Wt1os,Wt1
2	118330015	118335015	2	118375005	118380005	.	.	.	.	0,0,0	58	17.8803	18.9918	18.0742	17.8122	12	12	12	12	0.0296973	0.0322078	0.0390663	0.0392094	NA	NA,Eif2ak4,Eif2ak4,Gpr176,Eif2ak4
2	125780000	125785000	2	125865005	125870005	.	.	.	.	0,0,0	36	13.1903	14.3852	16.1661	11.4737	11	11	12	10	0.00129874	0.00125832	0.0390663	2.91867e-05	NA,Secisbp2l	NA,Cops2,Cops2,Cops2,Galk2,Cops2,Galk2
2	128134989	128139989	2	128300010	128305010	.	.	.	.	0,0,0	36	12.6061	13.187	16.3221	11.5762	11	11	12	10	0.00129874	0.00125832	0.0390663	2.91867e-05	NA,Bcl2l11,Bcl2l11,Bcl2l11,Bcl2l11,Bcl2l11	NA
2	128970007	128975007	2	129025007	129030007	.	.	.	.	0,0,0	60	17.9667	18.3595	18.2817	18.1165	12	12	12	12	0.0296973	0.0322078	0.0390663	0.0392094	NA,Zc3h6	NA
2	139635000	139640000	2	139675010	139680010	.	.	.	.	0,0,0	38	17.1886	18.4515	17.7424	17.3783	12	12	12	12	0.0296973	0.0322078	0.0390663	0.0392094	NA	NA,Ism1
2	144347505	144352505	2	144450000	144455000	.	.	.	.	0,0,0	42	18.3521	17.7058	18.5587	19.0659	12	12	12	12	0.0296973	0.0322078	0.0390663	0.0392094	NA	NA,Zfp133-ps,Gm38402
2	156169999	156174999	2	156269984	156274984	.	.	.	.	0,0,0	54	13.1855	13.0818	10.6541	17.5683	11	11	10	12	0.00129874	0.00125832	2.8219e-05	0.0392094	NA,Rbm39,Rbm39,Rbm39,Rbm39,Rbm39,Rbm39,Rbm39,Rbm39,Rbm39,Rbm39	NA
2	156415000	156420000	2	156494999	156499999	.	.	.	.	0,0,0	38	12.3935	13.7568	14.367	17.6303	11	11	11	12	0.00129874	0.00125832	0.00157772	0.0392094	NA,Epb41l1,Epb41l1,Epb41l1,Epb41l1,Epb41l1	NA
2	160809981	160814981	2	160874997	160879997	.	.	.	.	0,0,0	64	16.5867	17.4323	16.5318	18.0891	12	12	12	12	0.0296973	0.0322078	0.0390663	0.0392094	NA	NA,Lpin3,Lpin3,Zhx3
2	164345010	164350010	2	164404989	164409989	.	.	.	.	0,0,0	36	14.5002	11.4703	7.68818	11.0096	11	10	8	10	0.00129874	2.10581e-05	1.86907e-09	2.91867e-05	NA,Slpi,Svs5,Mir7678	NA,Matn4,Rbpjl,Matn4
2	168525011	168530011	2	168599987	168604987	.	.	.	.	0,0,0	58	14.18	16.2245	15.8091	16.8633	11	12	12	12	0.00129874	0.0322078	0.0390663	0.0392094	NA	NA,Nfatc2,Nfatc2,Nfatc2,Nfatc2,Nfatc2,Nfatc2,Nfatc2,Nfatc2,Nfatc2,Nfatc2,Nfatc2,Nfatc2,Nfatc2,Nfatc2,Nfatc2,Nfatc2,Nfatc2,Nfatc2
2	173585000	173590000	2	174070000	174075000	.	.	.	.	0,0,0	36	7.7255	9.03443	14.2965	7.52566	8	9	11	8	1.54304e-09	1.99826e-07	0.00157772	1.82112e-09	NA,Ankrd60,Ankrd60	NA,Stx16,Stx16,Stx16,Stx16,Stx16,Stx16,Stx16,Stx16
2	180663342	180668342	2	180731674	180736674	.	.	.	.	0,0,0	42	12.1346	12.5382	11.8285	12.8673	10	11	10	11	2.46826e-05	0.00125832	2.8219e-05	0.00154596	NA	NA,Slc17a9
2	5714994	5719994	2	5800005	5805005	.	.	.	.	0,0,0	34	12.2441	11.5644	17.9653	10.6413	10	10	12	10	0.000143123	0.000128458	0.0921578	0.000169372	NA,Camk1d,Camk1d,Camk1d	NA
2	10155005	10160005	2	10200005	10205005	.	.	.	.	0,0,0	60	17.8123	17.9493	17.412	18.7545	12	12	12	12	0.0708272	0.0770009	0.0921578	0.0928797	NA,Itih5	NA
2	11339994	11344994	2	11480000	11485000	.	.	.	.	0,0,0	34	15.3665	17.0635	19.5121	14.5243	11	12	12	11	0.00477156	0.0770009	0.0921578	0.00569329	NA,Gm13293	NA
2	13290010	13295010	2	13537485	13542485	.	.	.	.	0,0,0	42	10.3497	9.40679	16.5332	6.10369	10	9	12	7	0.000143123	1.92897e-06	0.0921578	1.50602e-10	NA	NA,Trdmt1
2	20964989	20969989	2	21185010	21190010	.	.	.	.	0,0,0	34	11.0109	11.9318	11.5877	16.6096	10	10	10	12	0.000143123	0.000128458	0.000166057	0.0928797	NA,Arhgap21,Gm13375,Arhgap21	NA
2	25415010	25420010	2	25579989	25584989	.	.	.	.	0,0,0	34	13.1719	9.78272	11.3776	9.02956	11	9	10	9	0.00477156	1.92897e-06	0.000166057	2.78294e-06	NA,Fut7,Fut7,Fut7,Fut7,Fut7,Fut7,Fut7,Abca2,Npdc1	NA,Phpt1,Mamdc4,Ajm1
2	25469984	25474984	2	25519994	25524994	.	.	.	.	0,0,0	44	16.511	18.6326	18.4189	16.5702	12	12	12	12	0.0708272	0.0770009	0.0921578	0.0928797	NA,Ptgds,Paxx	NA
2	26360015	26365015	2	26424994	26429994	.	.	.	.	0,0,0	50	13.8239	12.9392	12.6462	14.8758	11	11	11	11	0.00477156	0.00477465	0.0057994	0.00569329	NA,Dnlz,Dnlz,Dnlz,Card9	NA
2	29294990	29299990	2	29334995	29339995	.	.	.	.	0,0,0	34	14.109	14.8464	7.20197	18.2487	11	11	8	12	0.00477156	0.00477465	2.75959e-08	0.0928797	NA	NA,Med27,Med27
2	29389985	29394985	2	29459990	29464990	.	.	.	.	0,0,0	34	16.5624	17.8799	17.4907	17.293	12	12	12	12	0.0708272	0.0770009	0.0921578	0.0928797	NA,Med27,Med27	NA,Mir133c
2	29469999	29474999	2	29519995	29524995	.	.	.	.	0,0,0	42	13.4047	13.733	12.4344	13.277	11	11	11	11	0.00477156	0.00477465	0.0057994	0.00569329	NA,Mir133c	NA
2	33749995	33754995	2	33817500	33822500	.	.	.	.	0,0,0	38	15.0487	14.4602	17.6346	13.2603	11	11	12	11	0.00477156	0.00477465	0.0921578	0.00569329	NA	NA,Nron
2	35984995	35989995	2	36205004	36210004	.	.	.	.	0,0,0	54	12.038	11.8811	9.98781	18.1907	10	10	10	12	0.000143123	0.000128458	0.000166057	0.0928797	NA,Ttll11	NA
2	37502495	37507495	2	37547490	37552490	.	.	.	.	0,0,0	48	17.8624	17.2354	17.2167	15.8135	12	12	12	12	0.0708272	0.0770009	0.0921578	0.0928797	NA,Gpr21	NA
2	39060006	39065006	2	39194988	39199988	.	.	.	.	0,0,0	48	15.5586	13.3374	12.4973	15.3229	11	11	11	11	0.00477156	0.00477465	0.0057994	0.00569329	NA,Golga1,Golga1,Golga1	NA,Scai
2	49358752	49363752	2	49437500	49442500	.	.	.	.	0,0,0	40	12.7065	11.7172	14.3894	12.3629	11	10	11	10	0.00477156	0.000128458	0.0057994	0.000169372	NA	NA,Epc2
2	52740017	52745017	2	53084998	53089998	.	.	.	.	0,0,0	90	16.3602	18.1534	15.609	18.9376	12	12	12	12	0.0708272	0.0770009	0.0921578	0.0928797	NA,Stam2	NA
2	52864990	52869990	2	52980004	52985004	.	.	.	.	0,0,0	44	10.9344	11.8052	15.2795	11.3578	10	10	11	10	0.000143123	0.000128458	0.0057994	0.000169372	NA,Fmnl2	NA
2	65920009	65925009	2	65994985	65999985	.	.	.	.	0,0,0	34	12.0248	12.4205	12.4585	13.2694	10	11	11	11	0.000143123	0.00477465	0.0057994	0.00569329	NA,Csrnp3	NA
2	69519985	69524985	2	69570009	69575009	.	.	.	.	0,0,0	36	18.7381	18.6099	19.3342	16.2988	12	12	12	12	0.0708272	0.0770009	0.0921578	0.0928797	NA	NA,Lrp2
2	71314985	71319985	2	71365002	71370002	.	.	.	.	0,0,0	52	14.9164	16.5497	15.8594	17.8663	11	12	12	12	0.00477156	0.0770009	0.0921578	0.0928797	NA	NA,Slc25a12
2	74825002	74830002	2	74960012	74965012	.	.	.	.	0,0,0	34	10.6205	10.8669	9.53008	13.7849	10	10	9	11	0.000143123	0.000128458	2.73076e-06	0.00569329	NA,Mtx2	NA
2	84384995	84389995	2	84424995	84429995	.	.	.	.	0,0,0	52	10.5164	10.1411	10.3854	8.58298	10	10	10	9	0.000143123	0.000128458	0.000166057	2.78294e-06	NA	NA,Calcrl
2	90575002	90580002	2	90670002	90675002	.	.	.	.	0,0,0	42	13.8693	11.5926	13.6323	15.6372	11	10	11	12	0.00477156	0.000128458	0.0057994	0.0928797	NA,Ptprj	NA,Nup160
2	91929995	91934995	2	92054985	92059985	.	.	.	.	0,0,0	34	12.9725	11.5549	11.8716	17.0317	11	10	10	12	0.00477156	0.000128458	0.000166057	0.0928797	NA,Mdk,Mdk,Mir6999,Mdk,Mdk,Chrm4,Mdk,Mdk	NA
2	93650009	93655009	2	93700007	93705007	.	.	.	.	0,0,0	44	17.6878	18.4215	17.4069	16.0408	12	12	12	12	0.0708272	0.0770009	0.0921578	0.0928797	NA,Alx4	NA
2	102740000	102745000	2	103079995	103084995	.	.	.	.	0,0,0	36	13.7858	13.5603	15.6272	14.4509	11	11	12	11	0.00477156	0.00477465	0.0921578	0.00569329	NA,Gm13872,Gm13872	NA,Apip,Pdhx,Apip,Apip
2	102805001	102810001	2	103069990	103074990	.	.	.	.	0,0,0	34	12.1626	11.0025	15.0701	12.689	10	10	11	11	0.000143123	0.000128458	0.0057994	0.00569329	NA	NA,Apip,Pdhx,Apip,Apip
2	112500002	112505002	2	112610000	112615000	.	.	.	.	0,0,0	44	12.4999	11.7012	14.9286	12.6622	11	10	11	11	0.00477156	0.000128458	0.0057994	0.00569329	NA,Aven	NA,Aven
2	120569988	120574988	2	120605009	120610009	.	.	.	.	0,0,0	34	17.2979	17.6642	17.9753	17.9222	12	12	12	12	0.0708272	0.0770009	0.0921578	0.0928797	NA,Snap23,Zfp106,Snap23,Snap23	NA,Lrrc57,Lrrc57,Haus2,Haus2,Haus2,Lrrc57,Lrrc57,Lrrc57
2	120904985	120909985	2	120954995	120959995	.	.	.	.	0,0,0	36	15.5607	16.4426	14.3973	16.7685	11	12	11	12	0.00477156	0.0770009	0.0057994	0.0928797	NA	NA,Ubr1
2	121259985	121264985	2	121399995	121404995	.	.	.	.	0,0,0	42	10.076	12.798	13.8435	11.4319	10	11	11	10	0.000143123	0.00477465	0.0057994	0.000169372	NA,Trp53bp1,Trp53bp1	NA,Catsper2,Pdia3
2	131055009	131060009	2	131195004	131200004	.	.	.	.	0,0,0	36	14.773	14.1224	15.1087	12.9973	11	11	11	11	0.00477156	0.00477465	0.0057994	0.00569329	NA,Adam33,Adam33,Gfra4,Gfra4,Gfra4,Gfra4,Adam33	NA,Ap5s1,Cdc25b,Ap5s1,Ap5s1,Ap5s1,Cdc25b,Ap5s1
2	131565002	131570002	2	131755000	131760000	.	.	.	.	0,0,0	50	11.6056	12.2929	13.8463	11.131	10	10	11	10	0.000143123	0.000128458	0.0057994	0.000169372	NA,Adra1d	NA
2	142975000	142980000	2	143050013	143055013	.	.	.	.	0,0,0	34	13.4347	14.4774	16.418	16.1759	11	11	12	12	0.00477156	0.00477465	0.0921578	0.0928797	NA	NA,Snrpb2
2	154170000	154175000	2	154294997	154299997	.	.	.	.	0,0,0	38	9.43255	8.46086	8.14949	15.1461	9	9	9	11	2.34136e-06	1.92897e-06	2.73076e-06	0.00569329	NA,Bpifa5	NA,Bpifb9b
2	157365013	157370013	2	157449995	157454995	.	.	.	.	0,0,0	50	11.7137	14.3824	14.0778	19.0835	10	11	11	12	0.000143123	0.00477465	0.0057994	0.0928797	NA,Manbal	NA
2	158640013	158645013	2	158744996	158749996	.	.	.	.	0,0,0	54	15.3595	12.7106	11.4183	15.4051	11	11	10	11	0.00477156	0.00477465	0.000166057	0.00569329	NA,Mir3474	NA
2	160785006	160790006	2	160860011	160865011	.	.	.	.	0,0,0	64	13.2843	15.6102	16.3493	17.4289	11	12	12	12	0.00477156	0.0770009	0.0921578	0.0928797	NA	NA,Zhx3
2	164204990	164209990	2	164289990	164294990	.	.	.	.	0,0,0	34	10.7417	11.5167	12.5831	11.9296	10	10	11	10	0.000143123	0.000128458	0.0057994	0.000169372	NA,Wfdc15a,Wfdc15b,Wfdc15b	NA,Svs3a,Svs3a,Svs4
2	169644990	169649990	2	169725009	169730009	.	.	.	.	0,0,0	48	14.2394	14.8348	16.2989	14.066	11	11	12	11	0.00477156	0.00477465	0.0921578	0.00569329	NA,Tshz2,Tshz2,Tshz2,Tshz2	NA
2	172557493	172562493	2	172637502	172642502	.	.	.	.	0,0,0	36	14.816	16.0007	19.2173	16.4342	11	12	12	12	0.00477156	0.0770009	0.0921578	0.0928797	NA,Tfap2c,Tfap2c	NA
2	181104986	181109986	2	181174990	181179990	.	.	.	.	0,0,0	34	18.9613	18.9645	19.5121	19.289	12	12	12	12	0.0708272	0.0770009	0.0921578	0.0928797	NA	NA,Ppdpf,Ppdpf,Ppdpf,Ppdpf
2	181380009	181385009	2	181565012	181570012	.	.	.	.	0,0,0	62	14.1016	14.0759	16.6668	14.1634	11	11	12	11	0.00477156	0.00477465	0.0921578	0.00569329	NA,Lime1,Slc2a4rg-ps	NA,Uckl1os,Uckl1,Uckl1os
2	5325004	5330004	2	5389995	5394995	.	.	.	.	0,0,0	34	13.035	11.9083	9.85816	11.9481	11	10	10	10	0.0152617	0.000680464	0.000834431	0.000852571	NA	NA,Mir466d
2	10462502	10467502	2	10532484	10537484	.	.	.	.	0,0,0	34	3.24392	5.33265	11.1465	4.56417	5	7	10	6	9.5632e-14	2.46978e-09	0.000834431	1.68299e-11	NA,Mir467a-4,Mir669k,Mir669a-1,Mir669d-2,Mir466m,Mir467a-7,Mir669g,Mir669e,Mir467a-1,Mir467a-1,Mir297a-2,Mir466b-1,Mir669l,Mir467a-8,Mir467a-8,Mir669a-3,Mir669b,Mir466b-8,Mir466b-8,Mir466b-7,Mir466b-6,Mir669f,Mir467a-9,Mir467c,Mir466b-5,Mir466b-4,Mir669a-1,Mir297a-4,Mir297a-3,Mir467a-2,Mir467a-2,Mir467a-4,Mir466e,Mir466e,Mir467a-7,Mir669a-2,Mir669a-2,Mir669d,Mir467a-5,Mir467a-5,Mir669j,Mir467a-9	NA
2	18024999	18029999	2	18204997	18209997	.	.	.	.	0,0,0	38	9.30337	9.74996	11.8212	12.9881	9	9	10	11	1.87223e-05	1.6278e-05	0.000834431	0.0183317	NA,A930004D18Rik,Gm17762,A930004D18Rik	NA
2	30475004	30480004	2	30539991	30544991	.	.	.	.	0,0,0	50	14.8059	13.0644	12.8227	13.0657	11	11	11	11	0.0152617	0.0157429	0.0185848	0.0183317	NA,Ier5l	NA
2	34910002	34915002	2	35106664	35111664	.	.	.	.	0,0,0	38	8.19828	9.20425	11.2335	13.2078	9	9	10	11	1.87223e-05	1.6278e-05	0.000834431	0.0183317	NA,Phf19	NA,AI182371,AI182371,AI182371,Cntrl
2	34979994	34984994	2	35109992	35114992	.	.	.	.	0,0,0	46	14.1491	12.4966	15.151	13.8912	11	11	11	11	0.0152617	0.0157429	0.0185848	0.0183317	NA	NA,AI182371,AI182371,AI182371,Cntrl
2	50929998	50934998	2	51144997	51149997	.	.	.	.	0,0,0	42	12.5264	9.89035	10.811	11.5496	11	10	10	10	0.0152617	0.000680464	0.000834431	0.000852571	NA	NA,Rnd3
2	67609995	67614995	2	67659991	67664991	.	.	.	.	0,0,0	34	14.3311	14.1232	13.3345	14.9269	11	11	11	11	0.0152617	0.0157429	0.0185848	0.0183317	NA	NA,Mir7224
2	70225008	70230008	2	70474991	70479991	.	.	.	.	0,0,0	32	10.482	11.6438	14.8737	14.7185	10	10	11	11	0.000722858	0.000680464	0.0185848	0.0183317	NA	NA,Sp5
2	90575004	90580004	2	90624999	90629999	.	.	.	.	0,0,0	42	10.2363	10.7677	11.318	12.5202	10	10	10	11	0.000722858	0.000680464	0.000834431	0.0183317	NA,Ptprj	NA
2	90775002	90780002	2	90850002	90855002	.	.	.	.	0,0,0	34	13.1982	11.8656	10.4741	13.2557	11	10	10	11	0.0152617	0.000680464	0.000834431	0.0183317	NA,Agbl2,Agbl2,Agbl2	NA,Mtch2,Mtch2,Mtch2,Mtch2,Mtch2
2	104599991	104604991	2	104640004	104645004	.	.	.	.	0,0,0	50	14.7244	13.8703	14.7876	14.2464	11	11	11	11	0.0152617	0.0157429	0.0185848	0.0183317	NA,Cstf3,Cstf3,Cstf3	NA
2	109502502	109507502	2	109679999	109684999	.	.	.	.	0,0,0	32	11.1967	12.3886	13.105	14.196	10	11	11	11	0.000722858	0.0157429	0.0185848	0.0183317	NA	NA,Bdnf,Bdnf,Bdnf,Bdnf,Bdnf,Bdnf,Bdnf,Bdnf,Bdnf,Bdnf
2	113332484	113337484	2	113380004	113385004	.	.	.	.	0,0,0	34	12.0131	13.0577	13.0797	13.6466	10	11	11	11	0.000722858	0.0157429	0.0185848	0.0183317	NA,Fmn1,Fmn1	NA
2	117915008	117920008	2	118109995	118114995	.	.	.	.	0,0,0	32	14.3194	12.7729	13.4719	14.7797	11	11	11	11	0.0152617	0.0157429	0.0185848	0.0183317	NA	NA,Thbs1,Thbs1,Gm13986
2	129319987	129324987	2	129397506	129402506	.	.	.	.	0,0,0	38	11.263	12.6433	13.2803	13.2392	10	11	11	11	0.000722858	0.0157429	0.0185848	0.0183317	NA,Il1a	NA
2	139675012	139680012	2	139779995	139784995	.	.	.	.	0,0,0	34	11.9635	12.1244	13.4376	12.8953	10	10	11	11	0.000722858	0.000680464	0.0185848	0.0183317	NA,Ism1	NA
2	148392484	148397484	2	148570002	148575002	.	.	.	.	0,0,0	36	8.55901	9.30101	8.41416	14.1753	9	9	9	11	1.87223e-05	1.6278e-05	2.17487e-05	0.0183317	NA,Sstr4,Thbd	NA
2	150789997	150794997	2	150900005	150905005	.	.	.	.	0,0,0	38	12.2045	13.1951	12.8606	13.9235	10	11	11	11	0.000722858	0.0157429	0.0185848	0.0183317	NA,Pygb	NA,Gins1,Abhd12,Abhd12,Gins1,Abhd12
2	156720000	156725000	2	156867489	156872489	.	.	.	.	0,0,0	36	13.5197	10.5346	14.7005	9.02572	11	10	11	9	0.0152617	0.000680464	0.0185848	2.22427e-05	NA,4930405A21Rik,Dlgap4,Dlgap4	NA,5430405H02Rik,5430405H02Rik,Rab5if
2	163450000	163455000	2	163574991	163579991	.	.	.	.	0,0,0	32	9.70726	9.50692	8.20431	9.23315	9	9	9	9	1.87223e-05	1.6278e-05	2.17487e-05	2.22427e-05	NA,Gdap1l1,Gdap1l1	NA
2	167695004	167700004	2	167870008	167875008	.	.	.	.	0,0,0	36	11.5825	13.9006	13.98	12.0931	10	11	11	10	0.000722858	0.0157429	0.0185848	0.000852571	NA,Cebpb,Cebpb,A530013C23Rik,Cebpb,A530013C23Rik	NA
2	180375012	180380012	2	180465000	180470000	.	.	.	.	0,0,0	32	13.2263	14.6336	15.512	13.1981	11	11	11	11	0.0152617	0.0157429	0.0185848	0.0183317	NA,B230312C02Rik,Mir1a-1hg,Mir1a-1	NA,Slco4a1,Slco4a1,Slco4a1
2	11335004	11340004	2	11415000	11420000	.	.	.	.	0,0,0	32	12.8037	11.5772	12.2486	12.4739	11	10	10	11	0.0422094	0.00306124	0.00361511	0.0509858	NA,Gm13293	NA
2	28835001	28840001	2	29055000	29060000	.	.	.	.	0,0,0	40	12.6436	10.7154	8.98093	11.7352	11	10	9	10	0.0422094	0.00306124	0.000145272	0.00366917	NA,Ddx31,Gtf3c4,Gtf3c4,Ddx31	NA,Cfap77,Ttf1
2	29324991	29329991	2	29370012	29375012	.	.	.	.	0,0,0	30	15.4761	13.5514	11.8822	11.4708	11	11	10	10	0.0422094	0.044602	0.00361511	0.00366917	NA	NA,Med27,Med27
2	29815000	29820000	2	29965004	29970004	.	.	.	.	0,0,0	30	10.8811	10.5147	10.3938	13.055	10	10	10	11	0.00312435	0.00306124	0.00361511	0.0509858	NA,Urm1,Slc27a4	NA,Sptan1,Sptan1,Sptan1
2	30435000	30440000	2	30734987	30739987	.	.	.	.	0,0,0	30	14.1952	10.9737	14.7531	8.83963	11	10	11	9	0.0422094	0.00306124	0.0513002	0.000148993	NA,Ptpa,Ptpa	NA
2	35985004	35990004	2	36060012	36065012	.	.	.	.	0,0,0	30	14.5495	14.6272	14.3539	14.8501	11	11	11	11	0.0422094	0.044602	0.0513002	0.0509858	NA,Ttll11	NA,Morn5,Ndufa8
2	39099995	39104995	2	39185008	39190008	.	.	.	.	0,0,0	42	8.6306	8.89751	7.98538	12.4623	9	9	9	11	0.000128464	0.000118048	0.000145272	0.0509858	NA	NA,Scai
2	49452496	49457496	2	49627493	49632493	.	.	.	.	0,0,0	48	10.5869	10.8798	12.0406	11.6787	10	10	10	10	0.00312435	0.00306124	0.00361511	0.00366917	NA,Epc2	NA,Kif5c
2	51717489	51722489	2	51782506	51787506	.	.	.	.	0,0,0	38	11.8771	10.5576	13.0219	9.4124	10	10	11	9	0.00312435	0.00306124	0.0513002	0.000148993	NA,Gm13490	NA
2	59995008	60000008	2	60194991	60199991	.	.	.	.	0,0,0	30	10.2306	11.0949	10.4111	12.7182	10	10	10	11	0.00312435	0.00306124	0.00361511	0.0509858	NA	NA,March7
2	60121256	60126256	2	60190007	60195007	.	.	.	.	0,0,0	32	14.6133	12.582	14.5594	11.6424	11	11	11	10	0.0422094	0.044602	0.0513002	0.00366917	NA,Baz2b	NA
2	69680008	69685008	2	69739991	69744991	.	.	.	.	0,0,0	44	11.3281	13.534	13.6524	15.3573	10	11	11	11	0.00312435	0.044602	0.0513002	0.0509858	NA,Klhl41	NA
2	69724993	69729993	2	69784995	69789995	.	.	.	.	0,0,0	38	14.347	14.8727	15.0246	12.0877	11	11	11	10	0.0422094	0.044602	0.0513002	0.00366917	NA,Fastkd1,Ppig	NA,Phospho2,Ccdc173
2	71104987	71109987	2	71189995	71194995	.	.	.	.	0,0,0	30	10.8563	10.5418	7.98496	13.5024	10	10	9	11	0.00312435	0.00306124	0.000145272	0.0509858	NA,Cybrd1	NA
2	74309987	74314987	2	74495008	74500008	.	.	.	.	0,0,0	30	10.9922	11.1582	10.1874	12.4709	10	10	10	11	0.00312435	0.00306124	0.00361511	0.0509858	NA,4930441J16Rik	NA
2	76369995	76374995	2	76679987	76684987	.	.	.	.	0,0,0	34	13.1559	10.3013	15.5551	8.81231	11	10	11	9	0.0422094	0.00306124	0.0513002	0.000148993	NA,Rbm45,Cyct	NA,Plekha3,Fkbp7,Fkbp7,Fkbp7
2	77060012	77065012	2	77160002	77165002	.	.	.	.	0,0,0	36	12.788	14.0544	14.9506	14.854	11	11	11	11	0.0422094	0.044602	0.0513002	0.0509858	NA	NA,Ccdc141
2	89950000	89955000	2	90020008	90025008	.	.	.	.	0,0,0	30	14.9947	14.6058	9.94446	13.8936	11	11	10	11	0.0422094	0.044602	0.00361511	0.0509858	NA,Olfr1259	NA,Olfr1263,Olfr1264,Olfr1265
2	93067510	93072510	2	93467497	93472497	.	.	.	.	0,0,0	30	4.0904	3.84285	4.46565	4.05609	6	5	6	6	5.89696e-10	3.95586e-12	4.9674e-10	4.75751e-10	NA	NA,Cd82,Cd82,Cd82,Cd82,Cd82,Cd82
2	106430000	106435000	2	106697494	106702494	.	.	.	.	0,0,0	30	6.95106	6.62436	10.177	5.1743	8	8	10	7	3.13776e-06	2.79224e-06	0.00361511	5.44802e-08	NA	NA,Mpped2,Mpped2,Mpped2,Mpped2
2	113499996	113504996	2	113764996	113769996	.	.	.	.	0,0,0	30	9.31901	12.5663	15.1359	12.0625	9	11	11	10	0.000128464	0.044602	0.0513002	0.00366917	NA	NA,Grem1
2	115510003	115515003	2	115685000	115690000	.	.	.	.	0,0,0	34	10.0999	8.12298	10.2461	7.95813	10	9	10	9	0.00312435	0.000118048	0.00361511	0.000148993	NA,3110099E03Rik	NA
2	117992490	117997490	2	118104996	118109996	.	.	.	.	0,0,0	30	11.3282	10.5276	12.738	13.1761	10	10	11	11	0.00312435	0.00306124	0.0513002	0.0509858	NA	NA,Thbs1,Thbs1,Gm13986
2	118770003	118775003	2	118960010	118965010	.	.	.	.	0,0,0	30	11.7644	12.5388	14.5276	13.3423	10	11	11	11	0.00312435	0.044602	0.0513002	0.0509858	NA,Disp2,Phgr1,Ccdc9b	NA
2	150845003	150850003	2	150885010	150890010	.	.	.	.	0,0,0	54	11.6916	12.7942	11.8626	11.1341	10	11	10	10	0.00312435	0.044602	0.00361511	0.00366917	NA,Abhd12	NA
2	153709998	153714998	2	153929996	153934996	.	.	.	.	0,0,0	40	9.25683	10.9839	10.8463	14.3961	9	10	10	11	0.000128464	0.00306124	0.00361511	0.0509858	NA	NA,Bpifb3,Bpifb4
2	156189986	156194986	2	156275000	156280000	.	.	.	.	0,0,0	54	10.7422	10.1839	9.79276	14.4067	10	10	9	11	0.00312435	0.00306124	0.000145272	0.0509858	NA,Rbm39,Phf20,Rbm39,Rbm39,Rbm39,Rbm39,Rbm39,Rbm39,Rbm39,Rbm39,Rbm39	NA
2	163234996	163239996	2	163324996	163329996	.	.	.	.	0,0,0	30	11.9993	11.5071	10.2525	12.0462	10	10	10	10	0.00312435	0.00306124	0.00361511	0.00366917	NA,Tox2,Tox2	NA
2	165500011	165505011	2	165640003	165645003	.	.	.	.	0,0,0	30	13.6627	10.858	8.9405	11.689	11	10	9	10	0.0422094	0.00306124	0.000145272	0.00366917	NA,Trp53rka,Slc2a10	NA,Eya2,Eya2
2	170215003	170220003	2	170339999	170344999	.	.	.	.	0,0,0	36	11.5627	8.85658	9.44802	14.3809	10	9	9	11	0.00312435	0.000118048	0.000145272	0.0509858	NA	NA,Bcas1os2
2	173220004	173225004	2	173344998	173349998	.	.	.	.	0,0,0	38	14.3537	12.7967	14.098	11.8143	11	11	11	10	0.0422094	0.044602	0.0513002	0.00366917	NA,Zbp1,Zbp1	NA
2	15509996	15514996	2	15545003	15550003	.	.	.	.	0,0,0	28	8.81263	9.66527	11.1111	10.8972	9	9	10	10	0.000738383	0.000717831	0.0132497	0.0133797	NA,Malrd1	NA
2	34370000	34375000	2	34517501	34522501	.	.	.	.	0,0,0	32	10.5816	10.2178	10.7748	11.4858	10	10	10	10	0.0115665	0.011802	0.0132497	0.0133797	NA,Pbx3,Pbx3	NA
2	48944992	48949992	2	49309992	49314992	.	.	.	.	0,0,0	36	4.45372	4.82095	4.49273	8.81061	6	6	6	9	1.35183e-08	1.41346e-08	1.18187e-08	0.000854993	NA,Orc4,Orc4,Mbd5,Orc4,Orc4,Orc4,Orc4	NA
2	58315007	58320007	2	58455003	58460003	.	.	.	.	0,0,0	30	8.20387	7.47402	6.74495	7.71713	9	8	8	8	0.000738383	2.69435e-05	3.37114e-05	3.32275e-05	NA,Acvr1c	NA
2	74749996	74754996	2	74925003	74930003	.	.	.	.	0,0,0	38	7.41439	10.106	11.1503	8.69024	8	10	10	9	2.87841e-05	0.011802	0.0132497	0.000854993	NA,Haglr,Hoxd1,LOC102634401	NA
2	79255003	79260003	2	79495000	79500000	.	.	.	.	0,0,0	28	12.0369	10.2569	8.18561	12.1415	10	10	9	10	0.0115665	0.011802	0.000836743	0.0133797	NA,Itga4	NA
2	94039992	94044992	2	94164992	94169992	.	.	.	.	0,0,0	30	10.2915	9.51114	11.1347	9.81208	10	9	10	9	0.0115665	0.000717831	0.0132497	0.000854993	NA	NA,Hsd17b12
2	104884992	104889992	2	105130007	105135007	.	.	.	.	0,0,0	30	5.96566	7.32344	11.5474	7.36627	7	8	10	8	7.79987e-07	2.69435e-05	0.0132497	3.32275e-05	NA,Ccdc73	NA,Wt1os,Wt1
2	121869988	121874988	2	121950007	121955007	.	.	.	.	0,0,0	42	8.63523	8.27364	9.57988	9.36337	9	9	9	9	0.000738383	0.000717831	0.000836743	0.000854993	NA,Casc4,Casc4,Casc4,Casc4,Casc4	NA,Ctdspl2,Mageb3,Ctdspl2,Ctdspl2
2	131052500	131057500	2	131412494	131417494	.	.	.	.	0,0,0	32	9.46459	8.00185	10.5807	9.81824	9	9	10	9	0.000738383	0.000717831	0.0132497	0.000854993	NA,Adam33,Adam33,Gfra4,Gfra4,Gfra4,Mir6973b,Gfra4,Adam33	NA
2	147375000	147380000	2	147785000	147790000	.	.	.	.	0,0,0	28	7.29909	6.86113	6.53013	10.3749	8	8	8	10	2.87841e-05	2.69435e-05	3.37114e-05	0.0133797	NA,AI646519,Pax1	NA
2	151560003	151565003	2	151634999	151639999	.	.	.	.	0,0,0	34	10.8283	11.2082	10.4051	10.8695	10	10	10	10	0.0115665	0.011802	0.0132497	0.0133797	NA,Sdcbp2	NA,Snph,Snph,Snph
2	160375011	160380011	2	160500000	160505000	.	.	.	.	0,0,0	28	7.86153	7.91612	10.0899	7.15297	9	9	10	8	0.000738383	0.000717831	0.0132497	3.32275e-05	NA,Mafb	NA
2	172031657	172036657	2	172106672	172111672	.	.	.	.	0,0,0	28	11.3289	10.8631	9.58308	10.5073	10	10	9	10	0.0115665	0.011802	0.000836743	0.0133797	NA,Cbln4	NA
2	13002505	13007505	2	13227506	13232506	.	.	.	.	0,0,0	34	9.16228	9.36258	10.7711	10.7032	9	9	10	10	0.00351298	0.00361298	0.0409486	0.0412185	NA,C1ql3	NA
2	18678326	18683326	2	18761668	18766668	.	.	.	.	0,0,0	34	11.0866	10.5539	9.05611	12.1861	10	10	9	10	0.0359981	0.0378072	0.0039917	0.0412185	NA,Bmi1,Commd3	NA,Gm3363
2	25190000	25195000	2	25325000	25330000	.	.	.	.	0,0,0	26	7.90454	7.54145	10.7896	7.57015	9	8	10	8	0.00351298	0.000214713	0.0409486	0.000247555	NA,Nrarp,Tor4a	NA,Grin1,AA543186,Grin1,Grin1,Man1b1
2	28055000	28060000	2	28184996	28189996	.	.	.	.	0,0,0	26	10.5972	9.13543	8.19141	11.6075	10	9	9	10	0.0359981	0.00361298	0.0039917	0.0412185	NA	NA,Olfm1,Olfm1
2	35292494	35297494	2	35514996	35519996	.	.	.	.	0,0,0	26	6.27617	5.48959	9.64744	4.89296	8	7	9	6	0.000217023	8.6764e-06	0.0039917	2.28917e-07	NA,Gsn	NA
2	39012498	39017498	2	39180007	39185007	.	.	.	.	0,0,0	26	11.7318	10.8304	11.3348	11.5218	10	10	10	10	0.0359981	0.0378072	0.0409486	0.0412185	NA,Arpc5l,Rpl35	NA,Scai
2	51054994	51059994	2	51139992	51144992	.	.	.	.	0,0,0	30	9.87229	8.30071	8.45161	9.31918	10	9	9	9	0.0359981	0.00361298	0.0039917	0.00400034	NA	NA,Rnd3
2	51495007	51500007	2	51630010	51635010	.	.	.	.	0,0,0	26	6.62911	7.99629	9.91272	8.03213	8	9	10	9	0.000217023	0.00361298	0.0409486	0.00400034	NA	NA,Tas2r134
2	60795002	60800002	2	60950007	60955007	.	.	.	.	0,0,0	42	10.1051	10.5008	12.1655	10.4525	10	10	10	10	0.0359981	0.0378072	0.0409486	0.0412185	NA	NA,Rbms1
2	60865000	60870000	2	61400000	61405000	.	.	.	.	0,0,0	38	8.6486	8.06823	6.4476	10.4064	9	9	8	10	0.00351298	0.00361298	0.000244761	0.0412185	NA,Rbms1,Rbms1	NA
2	69205007	69210007	2	69429996	69434996	.	.	.	.	0,0,0	32	8.49709	8.22313	4.51314	10.9044	9	9	6	10	0.00351298	0.00361298	2.33749e-07	0.0412185	NA,G6pc2,G6pc2,Spc25,Spc25,G6pc2,Spc25,Spc25	NA
2	80325005	80330005	2	80649992	80654992	.	.	.	.	0,0,0	30	4.81063	4.59168	5.35782	5.8534	6	6	7	7	2.63015e-07	2.73447e-07	1.00269e-05	9.44824e-06	NA,Dnajc10	NA,Nup35,Nup35
2	92190007	92195007	2	92240007	92245007	.	.	.	.	0,0,0	34	11.1653	11.3963	8.28169	9.64969	10	10	9	9	0.0359981	0.0378072	0.0039917	0.00400034	NA,Phf21a,Phf21a,Phf21a,Mir1955,Phf21a,Phf21a,Phf21a,Phf21a,Phf21a	NA
2	93089998	93094998	2	93174996	93179996	.	.	.	.	0,0,0	50	8.88723	10.5346	9.86562	11.9602	9	10	10	10	0.00351298	0.0378072	0.0409486	0.0412185	NA	NA,Trp53i11,Trp53i11,Trp53i11,Trp53i11,Trp53i11
2	94165003	94170003	2	94240003	94245003	.	.	.	.	0,0,0	34	10.7627	10.3789	10.0804	11.9144	10	10	10	10	0.0359981	0.0378072	0.0409486	0.0412185	NA,Hsd17b12	NA,Mir129-2,Mir129b
2	103755000	103760000	2	103979996	103984996	.	.	.	.	0,0,0	26	5.35234	7.62832	4.72293	11.082	7	8	6	10	9.37851e-06	0.000214713	2.33749e-07	0.0412185	NA,Nat10	NA,Lmo2,Lmo2,Lmo2
2	106525003	106530003	2	106690000	106695000	.	.	.	.	0,0,0	30	11.4268	11.4169	8.6725	11.2715	10	10	9	10	0.0359981	0.0378072	0.0039917	0.0412185	NA,Gm14015	NA,Mpped2,Mpped2,Mpped2,Mpped2
2	106544996	106549996	2	106649992	106654992	.	.	.	.	0,0,0	26	10.5969	11.6326	11.7575	11.5132	10	10	10	10	0.0359981	0.0378072	0.0409486	0.0412185	NA	NA,BB218582
2	122192500	122197500	2	122240001	122245001	.	.	.	.	0,0,0	42	10.6657	11.2108	12.3456	10.8583	10	10	10	10	0.0359981	0.0378072	0.0409486	0.0412185	NA,Patl2,Terb2	NA,Sord
2	126152506	126157506	2	126357501	126362501	.	.	.	.	0,0,0	26	6.63825	7.26835	6.07709	7.82701	8	8	7	8	0.000217023	0.000214713	1.00269e-05	0.000247555	NA,Dtwd1,Fam227b,Dtwd1	NA
2	130095003	130100003	2	130207505	130212505	.	.	.	.	0,0,0	34	8.53846	11.7811	11.4023	11.2925	9	10	10	10	0.00351298	0.0378072	0.0409486	0.0412185	NA,Tgm6,AU015228	NA,Tmc2
2	130144999	130149999	2	130200010	130205010	.	.	.	.	0,0,0	34	10.4709	10.1565	7.66607	11.1676	10	10	8	10	0.0359981	0.0378072	0.000244761	0.0412185	NA	NA,Tmc2
2	133425008	133430008	2	133554994	133559994	.	.	.	.	0,0,0	34	11.4664	10.764	12.1169	9.14591	10	10	10	9	0.0359981	0.0378072	0.0409486	0.00400034	NA	NA,Bmp2,Mir3090
2	136993742	136998742	2	137107498	137112498	.	.	.	.	0,0,0	34	9.71777	8.43339	9.49001	7.79465	9	9	9	8	0.00351298	0.00361298	0.0039917	0.000247555	NA	NA,Jag1
2	137115006	137120006	2	137415000	137420000	.	.	.	.	0,0,0	32	7.75126	8.36759	12.2006	6.88894	8	9	10	8	0.000217023	0.00361298	0.0409486	0.000247555	NA,Jag1	NA
2	147859989	147864989	2	148035001	148040001	.	.	.	.	0,0,0	66	7.40277	9.2543	5.99503	8.69688	8	9	7	9	0.000217023	0.00361298	1.00269e-05	0.00400034	NA	NA,Foxa2,Foxa2,Foxa2
2	158655005	158660005	2	158859998	158864998	.	.	.	.	0,0,0	26	6.91268	6.38865	7.97943	7.82352	8	8	9	8	0.000217023	0.000214713	0.0039917	0.000247555	NA,Ppp1r16b,Ppp1r16b	NA
2	163100006	163105006	2	163215006	163220006	.	.	.	.	0,0,0	36	9.43507	9.5388	10.9356	10.9352	9	9	10	10	0.00351298	0.00361298	0.0409486	0.0412185	NA,Gtsf1l	NA,Tox2,Tox2,Tox2
2	163495003	163500003	2	163575000	163580000	.	.	.	.	0,0,0	36	9.05272	10.8544	10.8535	9.89387	9	10	10	10	0.00351298	0.0378072	0.0409486	0.0412185	NA,R3hdml,Hnf4a,Hnf4a	NA
2	164120008	164125008	2	164325010	164330010	.	.	.	.	0,0,0	46	5.93576	9.51381	11.9536	8.50849	7	9	10	9	9.37851e-06	0.00361298	0.0409486	0.00400034	NA	NA,Svs5,Svs6
2	164134998	164139998	2	164344996	164349996	.	.	.	.	0,0,0	46	4.8201	6.91252	4.90883	10.6911	6	8	6	10	2.63015e-07	0.000214713	2.33749e-07	0.0412185	NA	NA,Slpi,Svs5,Mir7678
2	165860000	165865000	2	165989996	165994996	.	.	.	.	0,0,0	34	7.7459	10.976	10.1712	11.5012	8	10	10	10	0.000217023	0.0378072	0.0409486	0.0412185	NA,Zmynd8	NA,Ncoa3
2	168265003	168270003	2	168459988	168464988	.	.	.	.	0,0,0	58	10.5817	9.98266	11.7946	8.85208	10	10	10	9	0.0359981	0.0378072	0.0409486	0.00400034	NA,Kcng1	NA
2	169635000	169640000	2	169799989	169804989	.	.	.	.	0,0,0	34	9.46446	7.85433	9.83089	6.56457	9	9	9	8	0.00351298	0.00361298	0.0039917	0.000247555	NA,Tshz2,Tshz2,Tshz2,Tshz2	NA
2	178095000	178100000	2	178130003	178135003	.	.	.	.	0,0,0	36	11.2804	10.6519	11.3152	9.25096	10	10	10	9	0.0359981	0.0378072	0.0409486	0.00400034	NA	NA,Phactr3,Phactr3,Phactr3
2	180375010	180380010	2	180610000	180615000	.	.	.	.	0,0,0	26	8.37626	10.8271	8.48807	10.0711	9	10	9	10	0.00351298	0.0378072	0.0039917	0.0412185	NA,B230312C02Rik,Mir1a-1hg,Mir1a-1	NA,Col9a3
2	181450003	181455003	2	181589994	181594994	.	.	.	.	0,0,0	36	9.23599	10.0243	8.97432	11.2844	9	10	9	10	0.00351298	0.0378072	0.0039917	0.0412185	NA,Zbtb46	NA,Samd10,Prpf6,Uckl1os,Mir7006,Zfp512b,Uckl1,Uckl1os
2	13277503	13282503	2	13932499	13937499	.	.	.	.	0,0,0	26	3.88148	3.22043	3.86696	3.60626	5	5	5	5	1.38402e-07	1.48564e-07	1.05274e-07	8.83053e-08	NA,Rsu1	NA
2	18389996	18394996	2	18585003	18590003	.	.	.	.	0,0,0	30	5.69186	6.0693	6.61859	6.89152	7	7	8	8	8.85484e-05	8.88559e-05	0.00147685	0.00147889	NA,Dnajc1,Dnajc1	NA
2	18870001	18875001	2	18994997	18999997	.	.	.	.	0,0,0	36	9.35707	8.61263	9.42226	9.72294	9	9	9	9	0.0137964	0.0147084	0.0154667	0.0154249	NA	NA,Pip4k2a,Pip4k2a,4930426L09Rik,Pip4k2a,Pip4k2a,Pip4k2a
2	21190000	21195000	2	21264996	21269996	.	.	.	.	0,0,0	32	10.4901	8.61686	7.42435	9.82786	10	9	8	9	0.0953865	0.0147084	0.00147685	0.0154249	NA,Thnsl1,Thnsl1,Thnsl1,Enkur,Thnsl1	NA
2	58044999	58049999	2	58175009	58180009	.	.	.	.	0,0,0	32	6.86477	7.17833	7.8194	8.88586	8	8	8	9	0.00131139	0.00138095	0.00147685	0.0154249	NA,Ermn	NA,Gm13546,Gm13546
2	60964993	60969993	2	61450000	61455000	.	.	.	.	0,0,0	32	8.64128	7.40283	7.5954	7.38913	9	8	8	8	0.0137964	0.00138095	0.00147685	0.00147889	NA,Gm13582,Rbms1	NA
2	74725000	74730000	2	74825000	74830000	.	.	.	.	0,0,0	32	9.1577	7.90515	8.07179	9.23338	9	9	9	9	0.0137964	0.0147084	0.0154667	0.0154249	NA,Hoxd3os1,Mir10b,Hoxd4	NA,Mtx2
2	115579999	115584999	2	115850006	115855006	.	.	.	.	0,0,0	38	6.46725	6.27437	6.99112	8.77996	8	8	8	9	0.00131139	0.00138095	0.00147685	0.0154249	NA,BC052040,BC052040	NA
2	127180006	127185006	2	127425000	127430000	.	.	.	.	0,0,0	24	5.62876	6.64346	6.41068	6.38447	7	8	8	8	8.85484e-05	0.00138095	0.00147685	0.00147889	NA	NA,Gpat2
2	127800000	127805000	2	128640003	128645003	.	.	.	.	0,0,0	26	8.39757	5.84789	7.52276	3.90963	9	7	8	5	0.0137964	8.88559e-05	0.00147685	8.83053e-08	NA,Nphp1,Nphp1,Nphp1,1500011K16Rik,Nphp1	NA
2	130084991	130089991	2	130259990	130264990	.	.	.	.	0,0,0	44	10.7197	7.926	8.90989	6.68258	10	9	9	8	0.0953865	0.0147084	0.0154667	0.00147889	NA,AU015228	NA,Nop56,Snord110,Nop56
2	134699992	134704992	2	134775004	134780004	.	.	.	.	0,0,0	32	6.59063	5.87817	6.25859	6.15942	8	7	8	7	0.00131139	8.88559e-05	0.00147685	9.10705e-05	NA	NA,Plcb1,Plcb1
2	140674996	140679996	2	142250000	142255000	.	.	.	.	0,0,0	28	5.84567	5.96023	6.40593	4.65426	7	7	8	6	8.85484e-05	8.88559e-05	0.00147685	3.63241e-06	NA,Flrt3,Flrt3	NA
2	144280003	144285003	2	144364996	144369996	.	.	.	.	0,0,0	42	9.01086	8.46963	6.76253	9.32278	9	9	8	9	0.0137964	0.0147084	0.00147685	0.0154249	NA,Snx5,Mgme1,Mgme1,Snx5,Mgme1,Mgme1	NA,Kat14,Pet117,Kat14
2	146219996	146224996	2	146414996	146419996	.	.	.	.	0,0,0	24	7.27659	7.48231	8.60208	9.07765	8	8	9	9	0.00131139	0.00138095	0.0154667	0.0154249	NA,Insm1	NA
2	150679996	150684996	2	151000003	151005003	.	.	.	.	0,0,0	30	3.99317	4.8	6.08009	5.44618	6	6	7	7	4.05494e-06	4.627e-06	9.42026e-05	9.10705e-05	NA,Vsx1,Acss1	NA,Ninl
2	152619995	152624995	2	152739997	152744997	.	.	.	.	0,0,0	32	5.46921	5.41878	5.86826	5.07969	7	7	7	7	8.85484e-05	8.88559e-05	9.42026e-05	9.10705e-05	NA,Rem1,Defb25	NA,Cox4i2,Id1,Id1
2	166289996	166294996	2	166435006	166440006	.	.	.	.	0,0,0	36	8.20049	8.05047	8.96601	8.97754	9	9	9	9	0.0137964	0.0147084	0.0154667	0.0154249	NA	NA,5031425F14Rik
2	178429996	178434996	2	178669996	178674996	.	.	.	.	0,0,0	36	7.00111	6.08333	5.73634	6.75025	8	7	7	8	0.00131139	8.88559e-05	9.42026e-05	0.00147889	NA,Cdh26,Cdh26	NA
2	3347496	3352496	2	3790006	3795006	.	.	.	.	0,0,0	28	6.30846	5.62833	7.90907	6.14542	8	7	9	7	0.00629987	0.000719886	0.0493812	0.000691176	NA,Acbd7	NA
2	5524999	5529999	2	5664993	5669993	.	.	.	.	0,0,0	38	6.60973	8.56284	9.19436	7.36717	8	9	9	8	0.00629987	0.0482933	0.0493812	0.00710092	NA	NA,Camk1d
2	14455009	14460009	2	14599996	14604996	.	.	.	.	0,0,0	26	8.40332	7.92023	8.30072	8.45508	9	9	9	9	0.0450188	0.0482933	0.0493812	0.049304	NA	NA,Cacnb2
2	19524998	19529998	2	19659994	19664994	.	.	.	.	0,0,0	34	9.37198	8.28253	9.56206	8.64849	9	9	9	9	0.0450188	0.0482933	0.0493812	0.049304	NA	NA,Gm3230,Otud1
2	22895006	22900006	2	23120009	23125009	.	.	.	.	0,0,0	30	9.18538	6.5502	9.03019	5.18532	9	8	9	7	0.0450188	0.00702475	0.0493812	0.000691176	NA,Pdss1,Pdss1,Pdss1	NA
2	29895000	29900000	2	30319996	30324996	.	.	.	.	0,0,0	22	8.5506	7.1172	9.66476	8.24172	9	8	9	9	0.0450188	0.00702475	0.0493812	0.049304	NA,Odf2,Odf2,Odf2,Odf2,Odf2,Odf2,Odf2,Odf2	NA
2	31679999	31684999	2	31915000	31920000	.	.	.	.	0,0,0	24	6.25684	5.54746	8.27712	5.55469	8	7	9	7	0.00629987	0.000719886	0.0493812	0.000691176	NA,Exosc2,Abl1,Abl1,Abl1,Gm13427	NA
2	50819993	50824993	2	51144996	51149996	.	.	.	.	0,0,0	36	6.23824	5.637	4.63025	8.8022	8	7	6	9	0.00629987	0.000719886	4.80606e-05	0.049304	NA	NA,Rnd3
2	50884996	50889996	2	51144999	51149999	.	.	.	.	0,0,0	30	7.60661	7.02028	7.27611	8.65942	8	8	8	9	0.00629987	0.00702475	0.00703196	0.049304	NA	NA,Rnd3
2	52754999	52759999	2	53199996	53204996	.	.	.	.	0,0,0	22	5.09585	5.35678	7.29238	3.16372	7	7	8	5	0.000665805	0.000719886	0.00703196	1.9749e-06	NA	NA,Prpf40a,Arl6ip6
2	54360006	54365006	2	54435009	54440009	.	.	.	.	0,0,0	22	8.32759	8.56885	8.45845	6.3385	9	9	9	8	0.0450188	0.0482933	0.0493812	0.00710092	NA	NA,Galnt13
2	58199996	58204996	2	58325000	58330000	.	.	.	.	0,0,0	34	4.8959	7.03443	8.95823	5.06264	6	8	9	7	4.84291e-05	0.00702475	0.0493812	0.000691176	NA	NA,Acvr1c
2	62989990	62994990	2	63185003	63190003	.	.	.	.	0,0,0	22	7.15646	7.32842	8.00291	6.80138	8	8	9	8	0.00629987	0.00702475	0.0493812	0.00710092	NA	NA,Kcnh7
2	63110006	63115006	2	63194990	63199990	.	.	.	.	0,0,0	22	8.30069	8.69435	8.14154	8.48539	9	9	9	9	0.0450188	0.0482933	0.0493812	0.049304	NA	NA,Kcnh7
2	71445003	71450003	2	71820000	71825000	.	.	.	.	0,0,0	24	2.39193	2.59225	2.65036	3.07608	3	4	4	4	2.69393e-09	1.12385e-07	6.3239e-08	5.98899e-08	NA,Metap1d	NA
2	72280009	72285009	2	72494996	72499996	.	.	.	.	0,0,0	22	8.40525	7.82137	8.56719	8.33534	9	8	9	9	0.0450188	0.00702475	0.0493812	0.049304	NA,Map3k20,Map3k20,Map3k20	NA
2	72520009	72525009	2	72970003	72975003	.	.	.	.	0,0,0	32	6.64731	8.0331	8.58885	6.65518	8	9	9	8	0.00629987	0.0482933	0.0493812	0.00710092	NA	NA,Sp3,Sp3os,Sp3
2	74700002	74705002	2	75310001	75315001	.	.	.	.	0,0,0	30	1.8813	1.80364	3.11526	2.86224	2	2	4	4	3.97147e-11	4.23426e-11	6.3239e-08	5.98899e-08	NA,Hoxd8,Hoxd3os1,Hoxd3,Hoxd8,Hoxd9,Hoxd10,Hoxd8	NA
2	93425000	93430000	2	93779996	93784996	.	.	.	.	0,0,0	22	5.43956	6.89846	8.96433	9.81864	7	8	9	9	0.000665805	0.00702475	0.0493812	0.049304	NA,Mir7001	NA
2	106444989	106449989	2	106964994	106969994	.	.	.	.	0,0,0	80	5.59332	6.50669	6.01824	6.98759	7	8	7	8	0.000665805	0.00702475	0.000695252	0.00710092	NA	NA,Arl14ep,Arl14ep,Arl14ep,Arl14ep
2	112794993	112799993	2	113425006	113430006	.	.	.	.	0,0,0	28	5.29316	7.06889	9.38727	7.47487	7	8	9	8	0.000665805	0.00702475	0.0493812	0.00710092	NA	NA,Fmn1
2	115285009	115290009	2	115495003	115500003	.	.	.	.	0,0,0	28	6.76835	6.53789	6.81508	7.9474	8	8	8	9	0.00629987	0.00702475	0.00703196	0.049304	NA	NA,3110099E03Rik
2	117665003	117670003	2	118114993	118119993	.	.	.	.	0,0,0	30	7.36802	7.11637	6.7132	7.48349	8	8	8	8	0.00629987	0.00702475	0.00703196	0.00710092	NA	NA,Thbs1,Thbs1,Gm13986
2	119435000	119440000	2	119630006	119635006	.	.	.	.	0,0,0	22	6.50726	6.70189	7.42054	9.51948	8	8	8	9	0.00629987	0.00702475	0.00703196	0.049304	NA	NA,Nusap1,Oip5,Nusap1
2	119960006	119965006	2	120169996	120174996	.	.	.	.	0,0,0	24	7.10181	6.00187	5.79755	7.55713	8	7	7	8	0.00629987	0.000719886	0.000695252	0.00710092	NA,Mapkbp1,Mapkbp1	NA
2	125654996	125659996	2	126030000	126035000	.	.	.	.	0,0,0	22	2.62279	3.60691	4.84683	5.71861	4	5	6	7	1.19538e-07	3.27093e-06	4.80606e-05	0.000691176	NA	NA,Fgf7
2	125774991	125779991	2	125840001	125845001	.	.	.	.	0,0,0	38	6.15151	6.51744	8.64475	8.52249	7	8	9	9	0.000665805	0.00702475	0.0493812	0.049304	NA,Secisbp2l	NA
2	127010004	127015004	2	127200007	127205007	.	.	.	.	0,0,0	24	7.95658	7.98692	6.67217	9.52905	9	9	8	9	0.0450188	0.0482933	0.00703196	0.049304	NA,Ap4e1	NA,1810024B03Rik,Snrnp200
2	129090000	129095000	2	129254993	129259993	.	.	.	.	0,0,0	24	7.53723	6.88854	6.9641	9.37733	8	8	8	9	0.00629987	0.00702475	0.00703196	0.049304	NA,Polr1b	NA
2	130015006	130020006	2	130094996	130099996	.	.	.	.	0,0,0	30	7.61724	9.12818	7.62195	8.52893	8	9	8	9	0.00629987	0.0482933	0.00703196	0.049304	NA,Tgm3,Mir6339	NA,Tgm6,AU015228
2	131350000	131355000	2	131525006	131530006	.	.	.	.	0,0,0	36	6.0745	6.51167	7.29727	9.33845	7	8	8	9	0.000665805	0.00702475	0.00703196	0.049304	NA,Rnf24	NA
2	131865006	131870006	2	132194993	132199993	.	.	.	.	0,0,0	22	5.36545	5.81287	5.46217	6.19173	7	7	7	7	0.000665805	0.000719886	0.000695252	0.000691176	NA,Erv3	NA
2	137114996	137119996	2	137940000	137945000	.	.	.	.	0,0,0	22	3.08521	2.99867	2.84911	3.11294	4	4	4	4	1.19538e-07	1.12385e-07	6.3239e-08	5.98899e-08	NA,Jag1	NA
2	139675000	139680000	2	139969996	139974996	.	.	.	.	0,0,0	24	5.94392	5.60995	4.19501	6.96413	7	7	6	8	0.000665805	0.000719886	4.80606e-05	0.00710092	NA,Ism1	NA
2	150689997	150694997	2	150890005	150895005	.	.	.	.	0,0,0	26	6.74102	7.89815	9.71158	7.99656	8	9	9	9	0.00629987	0.0482933	0.0493812	0.049304	NA,Vsx1	NA,Abhd12,Abhd12,Abhd12
2	151915002	151920002	2	152075000	152080000	.	.	.	.	0,0,0	22	8.85013	8.56536	8.30795	7.81752	9	9	9	8	0.0450188	0.0482933	0.0493812	0.00710092	NA,Angpt4	NA,Scrt2
2	153710000	153715000	2	153950002	153955002	.	.	.	.	0,0,0	34	7.20188	7.84478	9.02026	6.79765	8	9	9	8	0.00629987	0.0482933	0.0493812	0.00710092	NA	NA,Bpifb4
2	155080005	155085005	2	155395008	155400008	.	.	.	.	0,0,0	22	7.91396	7.99453	8.39794	8.62767	9	9	9	9	0.0450188	0.0482933	0.0493812	0.049304	NA,Ahcy	NA
2	158105000	158110000	2	158349997	158354997	.	.	.	.	0,0,0	28	6.77228	6.33304	7.24183	6.33884	8	8	8	8	0.00629987	0.00702475	0.00703196	0.00710092	NA	NA,Snhg17,Snhg17
2	163040005	163045005	2	163410002	163415002	.	.	.	.	0,0,0	30	7.68496	6.59622	4.89813	8.99523	8	8	6	9	0.00629987	0.00702475	4.80606e-05	0.049304	NA,Mybl2	NA,Jph2,2900093K20Rik,Oser1,Jph2
2	163059994	163064994	2	163415000	163420000	.	.	.	.	0,0,0	30	8.09598	5.63586	6.07977	7.07961	9	7	7	8	0.0450188	0.000719886	0.000695252	0.00710092	NA,Mybl2,Mir7003	NA,2900093K20Rik,Oser1
2	164960002	164965002	2	165360002	165365002	.	.	.	.	0,0,0	22	7.35616	7.91135	7.07389	8.61507	8	9	8	9	0.00629987	0.0482933	0.00703196	0.049304	NA,Slc12a5,Mmp9,Slc12a5,Slc12a5	NA,Zfp663
2	172044997	172049997	2	172209997	172214997	.	.	.	.	0,0,0	28	9.38036	7.26674	9.00666	6.15492	9	8	9	7	0.0450188	0.00702475	0.0493812	0.000691176	NA,Cbln4	NA
2	174469999	174474999	2	174850000	174855000	.	.	.	.	0,0,0	24	5.71586	5.93332	5.43048	7.43374	7	7	7	8	0.000665805	0.000719886	0.000695252	0.00710092	NA,Prelid3b,Atp5e	NA
2	179440000	179445000	2	179715002	179720002	.	.	.	.	0,0,0	28	8.85477	8.34993	9.76306	7.83174	9	9	9	8	0.0450188	0.0482933	0.0493812	0.00710092	NA,Cdh4,Cdh4	NA
3	97935000	97940000	3	97970052	97975052	.	.	.	.	0,0,0	74	36.4167	31.7473	33.4096	34.7161	15	15	15	15	0.000192337	0.000235937	0.000251392	0.000259571	NA,Gm5544	NA
3	68570024	68575024	3	68605048	68610048	.	.	.	.	0,0,0	70	34.0701	28.3933	30.9115	34.9373	15	14	15	15	0.000544764	5.52596e-07	0.000716992	0.000740405	NA,Schip1	NA
3	88712476	88717476	3	88754953	88759953	.	.	.	.	0,0,0	70	38.1593	31.7937	30.0788	34.591	15	15	14	15	0.000544764	0.0006569	6.21803e-07	0.000740405	NA,Rit1,Rit1,Rit1	NA
3	88543367	88548367	3	88596693	88601693	.	.	.	.	0,0,0	76	29.4132	25.3283	33.0735	22.4156	14	14	15	13	1.8701e-06	2.35824e-06	0.00193476	7.04749e-10	NA,Ubqln4,Mir1905,Rab25,Lamtor2,Lamtor2,Lamtor2,Lamtor2,Lamtor2,Mex3a	NA
3	89524966	89529966	3	89570066	89575066	.	.	.	.	0,0,0	62	27.1937	29.9722	30.6212	31.5777	14	14	14	15	9.71061e-05	0.000119655	0.000135863	0.0264397	NA,Kcnn3	NA
3	122575032	122580032	3	122615000	122620000	.	.	.	.	0,0,0	84	25.8573	26.9433	26.2336	24.0335	14	14	14	13	9.71061e-05	0.000119655	0.000135863	1.44651e-07	NA	NA,Fnbp1l,Fnbp1l
3	88089984	88094984	3	88125007	88130007	.	.	.	.	0,0,0	84	33.9907	33.7553	36.138	34.4457	15	15	15	15	0.0402183	0.0441069	0.0533244	0.055271	NA,Ttc24,Iqgap3	NA,Mef2d,Mef2d,Mef2d
3	103029985	103034985	3	103065000	103070000	.	.	.	.	0,0,0	66	32.1986	27.475	38.0235	29.8352	15	14	15	14	0.0402183	0.000387068	0.0533244	0.000448046	NA,Csde1,Csde1,Csde1	NA,Nras,Ampd1
3	107205000	107210000	3	107269912	107274912	.	.	.	.	0,0,0	60	16.8034	16.2619	16.2603	31.5519	12	12	12	15	2.66402e-10	2.30254e-10	3.45156e-10	0.055271	NA,Cym	NA,Lamtor5
3	121305081	121310081	3	121529972	121534972	.	.	.	.	0,0,0	58	21.0866	13.1576	30.6121	9.11149	13	11	14	9	2.60047e-06	4.17573e-13	0.00137067	7.28682e-21	NA	NA,Slc44a3
3	14534991	14539991	3	14574991	14579991	.	.	.	.	0,0,0	70	29.2645	26.4521	24.8119	27.5822	14	14	14	14	0.00702877	0.00848507	0.0101081	0.0100593	NA,Lrrcc1,Lrrcc1,Lrrcc1	NA,E2f5
3	88936669	88941669	3	89031658	89036658	.	.	.	.	0,0,0	54	15.4246	15.9272	17.6671	16.5821	11	12	12	12	6.73791e-11	8.14775e-08	1.20339e-07	1.17076e-07	NA,Dap3,Dap3	NA
3	90510046	90515046	3	90580000	90585000	.	.	.	.	0,0,0	54	18.1972	20.1165	23.9682	20.3353	12	13	13	13	9.15139e-08	5.0634e-05	6.72711e-05	6.7155e-05	NA,Chtop,Chtop,S100a14,S100a14,S100a1,S100a14,S100a13,Chtop,Chtop,Chtop,Chtop,Chtop,Chtop	NA,S100a3,S100a2,S100a3,S100a3
3	97409953	97414953	3	97525023	97530023	.	.	.	.	0,0,0	54	30.3152	27.9558	27.1694	26.9273	14	14	14	14	0.00702877	0.00848507	0.0101081	0.0100593	NA,Olfr1402	NA
3	97685806	97690806	3	97757487	97762487	.	.	.	.	0,0,0	54	19.9582	19.2942	22.9209	17.2662	13	12	13	12	4.76276e-05	8.14775e-08	6.72711e-05	1.17076e-07	NA,Mir7225	NA,Pde4dip,Pde4dip
3	108214981	108219981	3	108250018	108255018	.	.	.	.	0,0,0	86	22.7678	23.598	26.7759	18.7565	13	13	14	12	4.76276e-05	5.0634e-05	0.0101081	1.17076e-07	NA,Sypl2,Atxn7l2,Atxn7l2	NA,Psma5
3	108284963	108289963	3	108320050	108325050	.	.	.	.	0,0,0	62	24.5157	29.0974	26.7548	29.9331	13	14	14	14	0.000179309	0.0202867	0.0242977	0.024324	NA,Sort1,Sort1	NA
3	122190037	122195037	3	122244994	122249994	.	.	.	.	0,0,0	86	20.1344	22.7338	28.1731	28.1142	13	13	14	14	0.000179309	0.00019367	0.0242977	0.024324	NA	NA,Gclm
3	129828340	129833340	3	129871680	129876680	.	.	.	.	0,0,0	58	22.5219	22.7014	27.5636	21.6961	13	13	14	13	0.000179309	0.00019367	0.0242977	0.000255018	NA,Cfi,Cfi,Gar1,Rrh	NA,Pla2g12a,Pla2g12a,Pla2g12a,Pla2g12a
3	30894979	30899979	3	30955020	30960020	.	.	.	.	0,0,0	50	16.7887	16.6408	17.2637	21.5069	12	12	12	13	3.0288e-06	2.8171e-06	3.96515e-06	0.000891467	NA	NA,Phc3,Phc3,Phc3,Phc3
3	38891264	38896264	3	38940009	38945009	.	.	.	.	0,0,0	52	18.2784	14.1212	14.6498	14.1187	12	11	11	11	3.0288e-06	4.19014e-09	6.27638e-09	6.24829e-09	NA,Fat4	NA
3	57576649	57581649	3	57618349	57623349	.	.	.	.	0,0,0	64	25.2214	23.4502	20.9998	28.4316	14	13	13	14	0.0381449	0.000684552	0.000899735	0.0540063	NA,Wwtr1,Wwtr1	NA,Mir6377
3	85989940	85994940	3	86035009	86040009	.	.	.	.	0,0,0	50	24.3001	27.1448	30.5564	23.1521	13	14	14	13	0.000624846	0.0444927	0.0539207	0.000891467	NA,Prss48	NA
3	87889960	87894960	3	87929988	87934988	.	.	.	.	0,0,0	78	23.7531	23.3036	26.83	22.0214	13	13	14	13	0.000624846	0.000684552	0.0539207	0.000891467	NA,Hdgf,Prcc,Hdgf,Hdgf	NA,Mrpl24,Rrnad1,Isg20l2
3	88245000	88250000	3	88290000	88295000	.	.	.	.	0,0,0	62	21.3873	19.0855	18.6495	19.5977	13	12	12	13	0.000624846	2.8171e-06	3.96515e-06	0.000891467	NA,Rhbg	NA,Cct3,Tsacc,Tsacc
3	96004980	96009980	3	96039980	96044980	.	.	.	.	0,0,0	66	24.5021	25.6254	22.6316	30.8432	13	14	13	14	0.000624846	0.0444927	0.000899735	0.0540063	NA,Plekho1	NA
3	103109962	103114962	3	103144962	103149962	.	.	.	.	0,0,0	50	18.3969	23.7714	22.1352	22.8594	12	13	13	13	3.0288e-06	0.000684552	0.000899735	0.000891467	NA	NA,Dennd2c
3	108093301	108098301	3	108129962	108134962	.	.	.	.	0,0,0	60	24.8135	30.0403	28.4068	23.0623	14	14	14	13	0.0381449	0.0444927	0.0539207	0.000891467	NA,Ampd2,Ampd2,Gnat2,Ampd2,Ampd2,Gm12500	NA,Gnai3
3	121644944	121649944	3	121712527	121717527	.	.	.	.	0,0,0	52	20.5576	22.38	24.3825	28.8887	13	13	13	14	0.000624846	0.000684552	0.000899735	0.0540063	NA,A730020M07Rik,A730020M07Rik,A730020M07Rik	NA,F3
3	146107496	146112496	3	146170012	146175012	.	.	.	.	0,0,0	50	22.6315	19.2387	19.5693	15.4323	13	12	13	11	0.000624846	2.8171e-06	0.000899735	6.24829e-09	NA,Mcoln3,Wdr63	NA
3	41565000	41570000	3	41600000	41605000	.	.	.	.	0,0,0	56	23.7932	22.5165	24.3499	22.0931	13	13	13	13	0.00199232	0.0022036	0.00288377	0.00286254	NA,Jade1,Jade1,Jade1,Jade1	NA
3	94809982	94814982	3	94845034	94850034	.	.	.	.	0,0,0	48	22.5748	22.672	22.9677	20.9735	13	13	13	13	0.00199232	0.0022036	0.00288377	0.00286254	NA	NA,Pogz,Pogz
3	154321677	154326677	3	154563371	154568371	.	.	.	.	0,0,0	48	16.8496	15.7702	16.9632	22.0235	12	12	12	13	1.5342e-05	1.46372e-05	2.00658e-05	0.00286254	NA,AI606473,Lhx8	NA
3	8920016	8925016	3	8955016	8960016	.	.	.	.	0,0,0	66	22.4259	18.3243	19.9659	23.5859	13	12	13	13	0.0057497	6.90113e-05	0.00827338	0.00826849	NA,Mrps28	NA,Tpd52,Tpd52
3	8994950	8999950	3	9034983	9039983	.	.	.	.	0,0,0	58	17.0046	18.6795	13.1826	21.9803	12	12	11	13	7.0485e-05	6.90113e-05	3.66383e-07	0.00826849	NA,Tpd52,Tpd52,Tpd52,Tpd52,Tpd52,Tpd52,Tpd52	NA
3	90217492	90222492	3	90255007	90260007	.	.	.	.	0,0,0	50	23.0554	17.2036	17.7653	22.5767	13	12	12	13	0.0057497	6.90113e-05	9.24471e-05	0.00826849	NA,Rps27,Jtb,Rab13,Rps27rt,Rps27,Rab13	NA,Crtc2,Crtc2,Creb3l4,Creb3l4,Creb3l4,Dennd4b,Slc39a1,Mir7012,Dennd4b,Crtc2
3	103775000	103780000	3	103820000	103825000	.	.	.	.	0,0,0	46	19.6278	18.2779	14.2939	12.8185	13	12	11	11	0.0057497	6.90113e-05	3.66383e-07	3.63184e-07	NA,Hipk1,Hipk1,Hipk1,Hipk1	NA,Ap4b1,Ap4b1,Bcl2l15,Bcl2l15,Dclre1b,Ap4b1,Dclre1b
3	9711669	9716669	3	9833349	9838349	.	.	.	.	0,0,0	54	16.7584	14.2981	12.9001	14.7712	12	11	11	11	0.000293111	1.73377e-06	2.44656e-06	2.40808e-06	NA	NA,Pag1,Pag1
3	37724985	37729985	3	37764970	37769970	.	.	.	.	0,0,0	58	23.427	20.982	21.5237	18.9837	13	13	13	12	0.0152065	0.017148	0.0217121	0.000387596	NA,Gm5148	NA
3	60499990	60504990	3	60564990	60569990	.	.	.	.	0,0,0	44	12.2555	14.4258	20.2075	16.4801	10	11	13	12	6.12642e-09	1.73377e-06	0.0217121	0.000387596	NA,Mbnl1,Mbnl1,Mbnl1,Mbnl1,Mbnl1,Mbnl1	NA
3	86144992	86149992	3	86222485	86227485	.	.	.	.	0,0,0	58	12.9279	10.2742	12.0949	10.1918	11	10	10	10	2.12549e-06	4.50454e-09	7.20291e-09	7.19305e-09	NA,Rnu73b,Snord73a,Rps3a1	NA,Lrba,Lrba,Lrba
3	90122492	90127492	3	90199957	90204957	.	.	.	.	0,0,0	60	19.2498	18.043	18.1696	24.4125	12	12	12	13	0.000293111	0.000295744	0.000389273	0.0219071	NA	NA,Rps27,Rps27rt,Rps27,Rab13
3	136670000	136675000	3	136739986	136744986	.	.	.	.	0,0,0	44	22.4699	19.6866	20.1843	16.9015	13	13	13	12	0.0152065	0.017148	0.0217121	0.000387596	NA,Ppp3ca,Ppp3ca	NA
3	145974972	145979972	3	146069986	146074986	.	.	.	.	0,0,0	44	18.0485	20.8776	20.8369	24.1557	12	13	13	13	0.000293111	0.017148	0.0217121	0.0219071	NA,Syde2	NA
3	154271661	154276661	3	154324959	154329959	.	.	.	.	0,0,0	44	18.5875	18.2129	21.8985	13.8901	12	12	13	11	0.000293111	0.000295744	0.0217121	2.40808e-06	NA	NA,AI606473,Lhx8
3	10250000	10255000	3	10297493	10302493	.	.	.	.	0,0,0	42	17.9957	19.1896	21.0362	17.9537	12	12	13	12	0.00109074	0.00113134	0.0516631	0.00144164	NA,Fabp12,Fabp12	NA,Fabp12,Fabp12
3	22084980	22089980	3	22144966	22149966	.	.	.	.	0,0,0	44	16.6123	17.2703	20.9204	15.8563	12	12	13	12	0.00109074	0.00113134	0.0516631	0.00144164	NA,Tbl1xr1	NA
3	37839960	37844960	3	37900004	37905004	.	.	.	.	0,0,0	42	20.915	21.2191	22.2526	17.5614	13	13	13	12	0.0365944	0.0411484	0.0516631	0.00144164	NA	NA,Gm20755
3	38130039	38135039	3	38199973	38204973	.	.	.	.	0,0,0	48	15.4311	12.9416	11.7224	13.7827	11	11	10	11	1.24015e-05	1.04956e-05	6.6567e-08	1.43615e-05	NA	NA,5430434I15Rik
3	57286674	57291674	3	57430038	57435038	.	.	.	.	0,0,0	60	16.5893	18.1705	18.813	21.9016	12	12	12	13	0.00109074	0.00113134	0.00146086	0.0521681	NA,Tm4sf1,Tm4sf1	NA,Tm4sf4
3	63895000	63900000	3	63960006	63965006	.	.	.	.	0,0,0	42	11.5622	12.3555	13.4872	14.7998	10	10	11	11	5.7751e-08	4.42904e-08	1.4655e-05	1.43615e-05	NA	NA,Slc33a1,Slc33a1,Slc33a1,Gmps
3	68465006	68470006	3	68544993	68549993	.	.	.	.	0,0,0	58	16.7606	15.6192	17.3966	21.3761	12	12	12	13	0.00109074	0.00113134	0.00146086	0.0521681	NA,Schip1	NA
3	79515025	79520025	3	79557506	79562506	.	.	.	.	0,0,0	42	16.863	20.0866	20.0076	22.1582	12	13	13	13	0.00109074	0.0411484	0.0516631	0.0521681	NA	NA,Fnip2,4930589L23Rik
3	105454987	105459987	3	105504962	105509962	.	.	.	.	0,0,0	46	19.8067	20.776	21.4159	23.9736	13	13	13	13	0.0365944	0.0411484	0.0516631	0.0521681	NA,Kcnd3,Kcnd3os,Kcnd3	NA
3	116662481	116667481	3	116710025	116715025	.	.	.	.	0,0,0	42	21.4407	22.5349	21.2164	18.1165	13	13	13	12	0.0365944	0.0411484	0.0516631	0.00144164	NA,Mfsd14a	NA,Slc35a3,Slc35a3
3	142638330	142643330	3	142701674	142706674	.	.	.	.	0,0,0	42	13.0934	12.3441	13.0822	9.43425	11	10	11	9	1.24015e-05	4.42904e-08	1.4655e-05	1.81045e-10	NA	NA,Kyat3,Kyat3
3	146445000	146450000	3	146500000	146505000	.	.	.	.	0,0,0	44	19.0483	19.3123	20.8676	19.6771	12	12	13	13	0.00109074	0.00113134	0.0516631	0.0521681	NA,Ctbs,Ctbs	NA,Spata1,Spata1,Gng5
3	68760011	68765011	3	68870000	68875000	.	.	.	.	0,0,0	40	15.984	14.333	16.6849	11.8225	12	11	12	10	0.00368742	5.79125e-05	0.0048989	5.83388e-07	NA,Gm35584	NA,1110032F04Rik
3	100360005	100365005	3	100419964	100424964	.	.	.	.	0,0,0	50	14.7972	16.1126	18.2555	16.5478	11	12	12	12	6.52467e-05	0.00388347	0.0048989	0.0048709	NA	NA,4930406D18Rik
3	105450005	105455005	3	105615017	105620017	.	.	.	.	0,0,0	40	12.1343	14.7335	17.4286	17.1313	10	11	12	12	4.90633e-07	5.79125e-05	0.0048989	0.0048709	NA,Kcnd3,Kcnd3os,Kcnd3	NA
3	108842523	108847523	3	109062494	109067494	.	.	.	.	0,0,0	46	11.4332	10.5747	11.96	13.047	10	10	10	11	4.90633e-07	3.88536e-07	5.593e-07	7.78082e-05	NA,Stxbp3	NA
3	123324959	123329959	3	123369982	123374982	.	.	.	.	0,0,0	40	13.0768	13.3523	13.9868	14.2704	11	11	11	11	6.52467e-05	5.79125e-05	7.84691e-05	7.78082e-05	NA	NA,Mettl14
3	135284982	135289982	3	135324994	135329994	.	.	.	.	0,0,0	44	16.7404	14.9514	17.0628	14.4601	12	11	12	11	0.00368742	5.79125e-05	0.0048989	7.78082e-05	NA,Bdh2,Bdh2	NA
3	30459977	30464977	3	30502500	30507500	.	.	.	.	0,0,0	62	16.101	15.3118	13.1676	13.0948	12	11	11	11	0.0111176	0.000287016	0.00037403	0.00037049	NA	NA,Mecom,Mecom
3	32740011	32745011	3	32815005	32820005	.	.	.	.	0,0,0	38	19.0968	17.6104	12.2803	18.3992	12	12	10	12	0.0111176	0.0119182	4.27537e-06	0.0147251	NA,Ndufb5,Mrpl47	NA,Usp13
3	34077471	34082471	3	34195033	34200033	.	.	.	.	0,0,0	38	10.5651	10.5096	14.1301	12.7245	10	10	11	11	3.68718e-06	3.05739e-06	0.00037403	0.00037049	NA,Dnajc19,Dnajc19,Dnajc19,Dnajc19	NA
3	52275000	52280000	3	52339962	52344962	.	.	.	.	0,0,0	70	14.7388	13.1568	16.9715	11.8853	11	11	12	10	0.000309348	0.000287016	0.0147779	4.3412e-06	NA,Foxo1	NA
3	53664988	53669988	3	53725005	53730005	.	.	.	.	0,0,0	38	14.9	12.3835	14.8453	11.7076	11	11	11	10	0.000309348	0.000287016	0.00037403	4.3412e-06	NA,Frem2	NA
3	54920011	54925011	3	54965000	54970000	.	.	.	.	0,0,0	38	16.6412	17.5995	14.1387	18.8593	12	12	11	12	0.0111176	0.0119182	0.00037403	0.0147251	NA,Sertm1	NA
3	63979989	63984989	3	64017483	64022483	.	.	.	.	0,0,0	58	12.1574	10.2133	15.0081	11.8287	10	10	11	10	3.68718e-06	3.05739e-06	0.00037403	4.3412e-06	NA,Gmps	NA
3	69485006	69490006	3	69719963	69724963	.	.	.	.	0,0,0	38	13.8392	11.8622	18.0536	12.7135	11	10	12	11	0.000309348	3.05739e-06	0.0147779	0.00037049	NA	NA,Nmd3
3	82544994	82549994	3	82724986	82729986	.	.	.	.	0,0,0	38	9.02892	10.2883	9.54167	8.50684	9	10	9	9	2.44826e-08	3.05739e-06	2.92834e-08	2.8859e-08	NA,Npy2r,Npy2r	NA
3	137869994	137874994	3	137910005	137915005	.	.	.	.	0,0,0	38	15.7625	14.0484	16.8879	17.2161	12	11	12	12	0.0111176	0.000287016	0.0147779	0.0147251	NA,H2afz,H2afz,Dnajb14	NA,Lamtor3
3	30665010	30670010	3	30700030	30705030	.	.	.	.	0,0,0	36	17.4669	16.7768	18.8683	13.6065	12	12	12	11	0.0296973	0.0322078	0.0390663	0.00154596	NA	NA,Lrrc31
3	51427520	51432520	3	51467510	51472510	.	.	.	.	0,0,0	64	13.0562	11.929	12.6156	16.9358	11	10	11	12	0.00129874	2.10581e-05	0.00157772	0.0392094	NA,Naa15	NA,Rab33b
3	53031672	53036672	3	53253294	53258294	.	.	.	.	0,0,0	46	12.9893	12.8841	17.6541	9.49068	11	11	12	9	0.00129874	0.00125832	0.0390663	3.02434e-07	NA,Lhfp	NA
3	65580009	65585009	3	65642465	65647465	.	.	.	.	0,0,0	50	16.9108	17.0675	13.3072	18.8403	12	12	11	12	0.0296973	0.0322078	0.00157772	0.0392094	NA	NA,Mir8120
3	68659995	68664995	3	68699995	68704995	.	.	.	.	0,0,0	56	16.2457	14.7031	13.9331	18.9325	12	11	11	12	0.0296973	0.00125832	0.00157772	0.0392094	NA	NA,Il12a,Il12a
3	81035000	81040000	3	81375000	81380000	.	.	.	.	0,0,0	38	7.08939	9.93398	8.51008	9.55667	8	10	9	9	1.54304e-09	2.10581e-05	3.01536e-07	3.02434e-07	NA,Pdgfc,Pdgfc	NA
3	83709990	83714990	3	83755007	83760007	.	.	.	.	0,0,0	52	17.2384	15.4619	18.6638	16.1823	12	11	12	12	0.0296973	0.00125832	0.0390663	0.0392094	NA	NA,Sfrp2
3	95049990	95054990	3	95105009	95110009	.	.	.	.	0,0,0	52	16.7869	15.7145	17.4989	15.4984	12	12	12	11	0.0296973	0.0322078	0.0390663	0.00154596	NA,Psmd4,Psmd4	NA,Pip5k1a,Vps72,Pip5k1a
3	102154980	102159980	3	102209976	102214976	.	.	.	.	0,0,0	60	16.2709	15.7741	19.2969	16.0293	12	12	12	12	0.0296973	0.0322078	0.0390663	0.0392094	NA	NA,Vangl1
3	107697993	107702993	3	107918996	107923996	.	.	.	.	0,0,0	38	13.4512	12.2741	15.4359	12.1974	11	10	11	10	0.00129874	2.10581e-05	0.00157772	2.91867e-05	NA,Ahcyl1,Ahcyl1,Ahcyl1,Ahcyl1,Ahcyl1	NA,Gstm7,Gstm7
3	108834971	108839971	3	108895019	108900019	.	.	.	.	0,0,0	36	13.2126	13.1937	11.3269	18.029	11	11	10	12	0.00129874	0.00125832	2.8219e-05	0.0392094	NA,Stxbp3	NA,Prpf38b,Prpf38b,Fndc7,Fndc7
3	116254977	116259977	3	116325000	116330000	.	.	.	.	0,0,0	38	18.2986	15.7041	18.2843	12.3376	12	12	12	10	0.0296973	0.0322078	0.0390663	2.91867e-05	NA,Gpr88	NA
3	116594990	116599990	3	116654971	116659971	.	.	.	.	0,0,0	36	14.76	14.745	15.8497	17.7741	11	11	12	12	0.00129874	0.00125832	0.0390663	0.0392094	NA,Sass6,Sass6,Sass6,Trmt13	NA,Mfsd14a
3	122554990	122559990	3	122604971	122609971	.	.	.	.	0,0,0	36	13.8259	14.9581	15.9759	15.6152	11	11	12	12	0.00129874	0.00125832	0.0390663	0.0392094	NA	NA,Fnbp1l,Fnbp1l
3	135440000	135445000	3	135580000	135585000	.	.	.	.	0,0,0	40	11.109	13.1182	12.653	14.8349	10	11	11	11	2.46826e-05	0.00125832	0.00157772	0.00154596	NA,4930539J05Rik,Ube2d3,Ube2d3,Ube2d3,Ube2d3,Ube2d3,Ube2d3	NA
3	137985018	137990018	3	138030000	138035000	.	.	.	.	0,0,0	50	17.829	17.242	16.7198	15.8712	12	12	12	12	0.0296973	0.0322078	0.0390663	0.0392094	NA,Dapp1,Dapp1	NA
3	21980018	21985018	3	22060009	22065009	.	.	.	.	0,0,0	34	12.4955	13.6245	11.194	16.2949	11	11	10	12	0.00477156	0.00477465	0.000166057	0.0928797	NA	NA,Tbl1xr1
3	29074981	29079981	3	29155000	29160000	.	.	.	.	0,0,0	34	16.5269	16.5686	16.352	13.267	12	12	12	11	0.0708272	0.0770009	0.0921578	0.00569329	NA,Egfem1,Egfem1,Egfem1,Egfem1,Egfem1,Egfem1	NA
3	52445008	52450008	3	52524991	52529991	.	.	.	.	0,0,0	42	12.3084	13.6718	13.6795	13.5481	10	11	11	11	0.000143123	0.00477465	0.0057994	0.00569329	NA	NA,Gm30173
3	53539991	53544991	3	53639982	53644982	.	.	.	.	0,0,0	36	11.4473	16.0565	14.3092	17.8746	10	12	11	12	0.000143123	0.0770009	0.0057994	0.0928797	NA	NA,Frem2
3	54155000	54160000	3	54314995	54319995	.	.	.	.	0,0,0	34	10.7893	9.07358	10.4412	11.7087	10	9	10	10	0.000143123	1.92897e-06	0.000166057	0.000169372	NA,Trpc4,Trpc4,Trpc4,Trpc4	NA
3	59115008	59120008	3	59160013	59165013	.	.	.	.	0,0,0	44	16.9218	17.5949	16.1229	18.5809	12	12	12	12	0.0708272	0.0770009	0.0921578	0.0928797	NA,P2ry14,P2ry14,P2ry14,P2ry14,P2ry14,P2ry14,P2ry14	NA,F630111L10Rik,P2ry14
3	83959987	83964987	3	84030025	84035025	.	.	.	.	0,0,0	60	12.379	12.9023	14.5776	15.894	10	11	11	12	0.000143123	0.00477465	0.0057994	0.0928797	NA	NA,Tmem131l
3	86049982	86054982	3	86090025	86095025	.	.	.	.	0,0,0	34	17.5098	18.1338	16.0118	19.4722	12	12	12	12	0.0708272	0.0770009	0.0921578	0.0928797	NA	NA,Sh3d19
3	87389991	87394991	3	87435000	87440000	.	.	.	.	0,0,0	34	15.0413	16.7276	15.8484	18.9588	11	12	12	12	0.00477156	0.0770009	0.0921578	0.0928797	NA	NA,Fcrl5,Fcrl5
3	89375025	89380025	3	89425008	89430008	.	.	.	.	0,0,0	42	14.5792	14.7544	13.2672	13.026	11	11	11	11	0.00477156	0.00477465	0.0057994	0.00569329	NA,Gm15417,Dcst1,Zbtb7b,Zbtb7b,Zbtb7b	NA,Pygo2,Cks1b,Pygo2,Shc1,Pbxip1,Shc1,Pygo2,Pygo2,Pygo2
3	89404994	89409994	3	89477498	89482498	.	.	.	.	0,0,0	44	14.9572	15.447	13.6283	16.3004	11	11	11	12	0.00477156	0.00477465	0.0057994	0.0928797	NA,Gm15417,Lenep,Cks1b,Zbtb7b,Shc1,Shc1,Flad1,Flad1,Flad1,Flad1	NA
3	90570025	90575025	3	90654987	90659987	.	.	.	.	0,0,0	60	14.0746	14.4389	16.6857	16.2972	11	11	12	12	0.00477156	0.00477465	0.0921578	0.0928797	NA,S100a3,S100a3	NA,S100a8,S100a7a
3	100979991	100984991	3	101220008	101225008	.	.	.	.	0,0,0	36	13.4133	13.085	15.2237	9.51622	11	11	11	9	0.00477156	0.00477465	0.0057994	2.78294e-06	NA,Ttf2	NA
3	102754999	102759999	3	102790000	102795000	.	.	.	.	0,0,0	34	16.3471	17.4588	15.9597	18.7916	12	12	12	12	0.0708272	0.0770009	0.0921578	0.0928797	NA	NA,Tshb,Tshb,Tshb
3	115715008	115720008	3	115775008	115780008	.	.	.	.	0,0,0	34	15.974	18.7632	18.7555	17.7447	12	12	12	12	0.0708272	0.0770009	0.0921578	0.0928797	NA,S1pr1	NA
3	122519987	122524987	3	122620020	122625020	.	.	.	.	0,0,0	50	15.6893	13.7388	10.0915	16.8234	12	11	10	12	0.0708272	0.00477465	0.000166057	0.0928797	NA	NA,Fnbp1l,Fnbp1l
3	123399975	123404975	3	123445000	123450000	.	.	.	.	0,0,0	38	14.7551	14.8996	16.0207	15.0489	11	11	12	11	0.00477156	0.00477465	0.0921578	0.00569329	NA	NA,Prss12
3	131115008	131120008	3	131195029	131200029	.	.	.	.	0,0,0	48	11.267	12.1701	14.3366	13.4826	10	10	11	11	0.000143123	0.000128458	0.0057994	0.00569329	NA,Lef1,Lef1,Lef1	NA
3	143242483	143247483	3	143372512	143377512	.	.	.	.	0,0,0	34	8.52145	8.32635	9.88599	9.74571	9	9	10	9	2.34136e-06	1.92897e-06	0.000166057	2.78294e-06	NA,A830019L24Rik	NA
3	144515008	144520008	3	144564991	144569991	.	.	.	.	0,0,0	56	11.8353	13.4044	14.4308	16.6196	10	11	11	12	0.000143123	0.00477465	0.0057994	0.0928797	NA	NA,Hs2st1,Selenof,Hs2st1
3	145947495	145952495	3	145985005	145990005	.	.	.	.	0,0,0	58	12.9725	13.1963	14.3192	16.1615	11	11	11	12	0.00477156	0.00477465	0.0057994	0.0928797	NA,2410004B18Rik,2410004B18Rik,2410004B18Rik,2410004B18Rik	NA,Syde2
3	148889984	148894984	3	148964984	148969984	.	.	.	.	0,0,0	48	17.0618	17.2974	16.2552	18.5858	12	12	12	12	0.0708272	0.0770009	0.0921578	0.0928797	NA	NA,Adgrl2
3	152260000	152265000	3	152385007	152390007	.	.	.	.	0,0,0	34	16.3461	14.7793	17.2123	17.8145	12	11	12	12	0.0708272	0.00477465	0.0921578	0.0928797	NA,Nexn,Nexn	NA,Zzz3,Zzz3,Zzz3,Zzz3
3	7362480	7367480	3	7502503	7507503	.	.	.	.	0,0,0	32	7.76408	7.85929	7.02309	10.7344	8	9	8	10	2.87141e-07	1.6278e-05	3.46143e-07	0.000852571	NA,Pkia	NA,Zc2hc1a
3	38894984	38899984	3	38985007	38990007	.	.	.	.	0,0,0	38	12.4793	10.6948	12.9782	10.6201	11	10	11	10	0.0152617	0.000680464	0.0185848	0.000852571	NA,Fat4	NA
3	69005000	69010000	3	69040000	69045000	.	.	.	.	0,0,0	48	13.7926	10.403	12.8018	10.1984	11	10	11	10	0.0152617	0.000680464	0.0185848	0.000852571	NA,Mir16-2,Ift80,Mir15b,Smc4,Smc4	NA,Trim59
3	83940007	83945007	3	84150000	84155000	.	.	.	.	0,0,0	40	11.2421	11.6354	13.1466	13.646	10	10	11	11	0.000722858	0.000680464	0.0185848	0.0183317	NA	NA,Mnd1
3	95530007	95535007	3	95575000	95580000	.	.	.	.	0,0,0	46	11.2496	13.3093	13.711	14.9554	10	11	11	11	0.000722858	0.0157429	0.0185848	0.0183317	NA,Ctss,Ctss	NA,Golph3l,Golph3l,Golph3l
3	103288740	103293740	3	103362522	103367522	.	.	.	.	0,0,0	38	12.6339	12.6237	15.2155	13.3873	11	11	11	11	0.0152617	0.0157429	0.0185848	0.0183317	NA,Trim33,Trim33	NA
3	122924996	122929996	3	122980011	122985011	.	.	.	.	0,0,0	34	11.608	10.473	7.10684	10.5324	10	10	8	10	0.000722858	0.000680464	3.46143e-07	0.000852571	NA,1810037I17Rik,4933405D12Rik	NA,Usp53
3	133878773	133883773	3	134242502	134247502	.	.	.	.	0,0,0	32	10.2448	8.76147	10.4896	5.27708	10	9	10	7	0.000722858	1.6278e-05	0.000834431	3.08942e-09	NA	NA,Mir1895,Cxxc4
3	135483751	135488751	3	135562518	135567518	.	.	.	.	0,0,0	32	11.1012	13.1428	14.6156	15.0097	10	11	11	11	0.000722858	0.0157429	0.0185848	0.0183317	NA,Manba	NA
3	152479992	152484992	3	152710000	152715000	.	.	.	.	0,0,0	44	9.00072	10.692	13.9806	10.0233	9	10	11	10	1.87223e-05	0.000680464	0.0185848	0.000852571	NA	NA,Pigk,Pigk
3	27465000	27470000	3	27704985	27709985	.	.	.	.	0,0,0	30	6.93998	6.32158	7.08109	8.02585	8	8	8	9	3.13776e-06	2.79224e-06	3.66851e-06	0.000148993	NA	NA,Fndc3b,Fndc3b
3	30690007	30695007	3	30859985	30864985	.	.	.	.	0,0,0	30	10.4349	10.2535	11.7029	7.53736	10	10	10	8	0.00312435	0.00306124	0.00361511	3.67606e-06	NA,Lrrc31	NA,Gpr160,Gpr160,Gpr160,Gpr160,Gpr160,Gpr160,Gpr160
3	38894985	38899985	3	39004978	39009978	.	.	.	.	0,0,0	38	10.6126	9.36057	12.6693	8.0869	10	9	11	9	0.00312435	0.000118048	0.0513002	0.000148993	NA,Fat4	NA
3	51650000	51655000	3	52195000	52200000	.	.	.	.	0,0,0	34	8.25039	9.41321	10.2883	9.1406	9	9	10	9	0.000128464	0.000118048	0.00361511	0.000148993	NA,Mgst2,Mgst2	NA
3	68755006	68760006	3	68799993	68804993	.	.	.	.	0,0,0	44	14.7215	13.9363	14.6923	14.2599	11	11	11	11	0.0422094	0.044602	0.0513002	0.0509858	NA,Gm35584	NA
3	68870013	68875013	3	68935006	68940006	.	.	.	.	0,0,0	38	13.2545	11.8525	12.8753	12.3586	11	10	11	10	0.0422094	0.00306124	0.0513002	0.00366917	NA,1110032F04Rik	NA
3	82047496	82052496	3	82147517	82152517	.	.	.	.	0,0,0	30	8.74762	8.72605	10.5216	9.32101	9	9	10	9	0.000128464	0.000118048	0.00361511	0.000148993	NA	NA,Gucy1a1,Gucy1a1,Gucy1a1
3	83940017	83945017	3	84040006	84045006	.	.	.	.	0,0,0	34	12.3992	12.739	12.0644	13.367	11	11	10	11	0.0422094	0.044602	0.00361511	0.0509858	NA	NA,Tmem131l
3	84709979	84714979	3	84800013	84805013	.	.	.	.	0,0,0	66	7.29992	9.77871	9.55507	10.2545	8	9	9	10	3.13776e-06	0.000118048	0.000145272	0.00366917	NA	NA,Fbxw7
3	85775020	85780020	3	85890013	85895013	.	.	.	.	0,0,0	32	11.3181	12.7749	13.5091	11.875	10	11	11	10	0.00312435	0.044602	0.0513002	0.00366917	NA	NA,Glt28d2
3	93369986	93374986	3	93509979	93514979	.	.	.	.	0,0,0	68	11.2024	10.3448	14.2914	9.01425	10	10	11	9	0.00312435	0.00306124	0.0513002	0.000148993	NA	NA,S100a11
3	100482506	100487506	3	100554996	100559996	.	.	.	.	0,0,0	42	11.6692	11.1123	10.1358	11.9216	10	10	10	10	0.00312435	0.00306124	0.00361511	0.00366917	NA,Tent5c	NA
3	100984983	100989983	3	101095013	101100013	.	.	.	.	0,0,0	40	11.2866	11.2692	14.0867	11.1839	10	10	11	10	0.00312435	0.00306124	0.0513002	0.00366917	NA	NA,Ptgfrn
3	108479993	108484993	3	108544996	108549996	.	.	.	.	0,0,0	44	14.6991	14.9865	13.7722	15.3704	11	11	11	11	0.0422094	0.044602	0.0513002	0.0509858	NA	NA,Tmem167b,5330417C22Rik,5330417C22Rik,1700013F07Rik,Scarna2,5330417C22Rik,5330417C22Rik,5330417C22Rik
3	122417499	122422499	3	122634996	122639996	.	.	.	.	0,0,0	34	8.37739	6.96869	5.34021	10.2613	9	8	7	10	0.000128464	2.79224e-06	5.82613e-08	0.00366917	NA,Bcar3	NA
3	127645002	127650002	3	127694995	127699995	.	.	.	.	0,0,0	56	11.0076	11.7967	15.2897	12.8297	10	10	11	11	0.00312435	0.00306124	0.0513002	0.0509858	NA,Neurog2	NA
3	132835013	132840013	3	132960000	132965000	.	.	.	.	0,0,0	32	8.50946	9.7516	8.48299	9.50471	9	9	9	9	0.000128464	0.000118048	0.000145272	0.000148993	NA	NA,Npnt,Npnt,Npnt,Npnt,Npnt
3	134905006	134910006	3	135200006	135205006	.	.	.	.	0,0,0	30	7.26166	6.62749	7.08694	8.78899	8	8	8	9	3.13776e-06	2.79224e-06	3.66851e-06	0.000148993	NA	NA,Cenpe
3	141467496	141472496	3	141655003	141660003	.	.	.	.	0,0,0	62	10.2476	10.296	15.1238	11.8305	10	10	11	10	0.00312435	0.00306124	0.0513002	0.00366917	NA,Unc5c,Unc5c	NA
3	144462485	144467485	3	144567494	144572494	.	.	.	.	0,0,0	38	10.8048	10.575	14.5065	11.0621	10	10	11	10	0.00312435	0.00306124	0.0513002	0.00366917	NA	NA,Hs2st1,Selenof,Hs2st1
3	146405013	146410013	3	146500000	146505000	.	.	.	.	0,0,0	36	11.5429	11.422	9.70222	13.3707	10	10	9	11	0.00312435	0.00306124	0.000145272	0.0509858	NA,Ssx2ip,Ssx2ip,Ssx2ip,Ssx2ip,Ssx2ip	NA,Spata1,Spata1,Gng5
3	146575013	146580013	3	146630013	146635013	.	.	.	.	0,0,0	38	15.1823	15.4783	11.9035	14.1428	11	11	10	11	0.0422094	0.044602	0.00361511	0.0509858	NA	NA,Gm16325
3	30435019	30440019	3	30509990	30514990	.	.	.	.	0,0,0	62	12.2755	11.5462	11.9266	11.5394	10	10	10	10	0.0115665	0.011802	0.0132497	0.0133797	NA	NA,Mecom,Mecom
3	53040016	53045016	3	53164993	53169993	.	.	.	.	0,0,0	46	10.066	10.6119	10.779	10.1362	10	10	10	10	0.0115665	0.011802	0.0132497	0.0133797	NA,Lhfp	NA
3	68065000	68070000	3	68350012	68355012	.	.	.	.	0,0,0	28	6.36068	5.41004	7.26766	5.06925	8	7	8	7	2.87841e-05	6.84754e-07	3.37114e-05	8.05511e-07	NA,Schip1,Schip1	NA
3	88755000	88760000	3	88835000	88840000	.	.	.	.	0,0,0	28	3.28885	5.99518	6.03044	4.28453	5	7	7	6	1.67096e-10	6.84754e-07	8.44304e-07	1.11659e-08	NA	NA,Gon4l,1500004A13Rik,Gon4l
3	108265012	108270012	3	108440000	108445000	.	.	.	.	0,0,0	36	11.3673	9.10123	9.83101	6.65015	10	9	9	8	0.0115665	0.000717831	0.000836743	3.32275e-05	NA,Psma5	NA,Sars,Sars
3	116025012	116030012	3	116240018	116245018	.	.	.	.	0,0,0	36	12.178	11.1446	12.3071	9.6897	10	10	10	9	0.0115665	0.011802	0.0132497	0.000854993	NA	NA,Gpr88
3	122049987	122054987	3	122094981	122099981	.	.	.	.	0,0,0	52	10.4435	11.2603	12.1385	11.848	10	10	10	10	0.0115665	0.011802	0.0132497	0.0133797	NA,Abca4	NA
3	123445003	123450003	3	123502500	123507500	.	.	.	.	0,0,0	36	9.97558	9.34168	7.82839	9.18425	10	9	8	9	0.0115665	0.000717831	3.37114e-05	0.000854993	NA,Prss12	NA,Snora24,Snhg8
3	130181657	130186657	3	130686670	130691670	.	.	.	.	0,0,0	44	7.10295	6.82043	7.28792	7.99166	8	8	8	9	2.87841e-05	2.69435e-05	3.37114e-05	0.000854993	NA,Col25a1,Col25a1,Col25a1	NA
3	135880003	135885003	3	136669993	136674993	.	.	.	.	0,0,0	30	7.87829	7.71591	10.7302	9.99957	9	8	10	10	0.000738383	2.69435e-05	0.0132497	0.0133797	NA	NA,Ppp3ca,Ppp3ca
3	145419987	145424987	3	145574993	145579993	.	.	.	.	0,0,0	28	10.0324	8.90367	9.90998	10.6165	10	9	10	10	0.0115665	0.000717831	0.0132497	0.0133797	NA	NA,Znhit6,Znhit6
3	9254993	9259993	3	9465000	9470000	.	.	.	.	0,0,0	26	7.84387	7.20441	7.45845	7.71504	9	8	8	8	0.00351298	0.000214713	0.000244761	0.000247555	NA,Zbtb10	NA
3	27654993	27659993	3	27705000	27710000	.	.	.	.	0,0,0	36	9.62779	9.44299	12.1989	9.99172	9	9	10	10	0.00351298	0.00361298	0.0409486	0.0412185	NA	NA,Fndc3b,Fndc3b
3	30004996	30009996	3	30095012	30100012	.	.	.	.	0,0,0	42	9.13395	7.8371	8.48286	8.20544	9	9	9	9	0.00351298	0.00361298	0.0039917	0.00400034	NA,Mecom	NA
3	34289996	34294996	3	34635000	34640000	.	.	.	.	0,0,0	34	8.91632	7.36949	6.37371	11.8494	9	8	8	10	0.00351298	0.000214713	0.000244761	0.0412185	NA	NA,Sox2,Mir1897
3	49704999	49709999	3	49740000	49745000	.	.	.	.	0,0,0	34	10.7879	8.67542	9.65794	10.5544	10	9	9	10	0.0359981	0.00361298	0.0039917	0.0412185	NA	NA,Pcdh18
3	57844994	57849994	3	57950017	57955017	.	.	.	.	0,0,0	30	10.7809	9.78668	12.2371	10.0328	10	9	10	10	0.0359981	0.00361298	0.0409486	0.0412185	NA,Pfn2	NA
3	79200000	79205000	3	79430000	79435000	.	.	.	.	0,0,0	30	10.8135	9.47125	9.93391	8.62788	10	9	10	9	0.0359981	0.00361298	0.0409486	0.00400034	NA,4921511C10Rik	NA
3	79220000	79225000	3	79430005	79435005	.	.	.	.	0,0,0	26	6.67066	8.77729	11.7802	9.14126	8	9	10	9	0.000217023	0.00361298	0.0409486	0.00400034	NA,4921511C10Rik	NA
3	81980017	81985017	3	82030000	82035000	.	.	.	.	0,0,0	38	9.02217	8.97872	10.1298	8.99108	9	9	10	9	0.00351298	0.00361298	0.0409486	0.00400034	NA,Asic5,Tdo2	NA
3	82540011	82545011	3	82635011	82640011	.	.	.	.	0,0,0	26	8.73783	9.58919	11.9016	11.6285	9	9	10	10	0.00351298	0.00361298	0.0409486	0.0412185	NA,Npy2r,Npy2r	NA
3	85920002	85925002	3	86127488	86132488	.	.	.	.	0,0,0	30	7.41373	5.43798	5.22051	5.65872	8	7	7	7	0.000217023	8.6764e-06	1.00269e-05	9.44824e-06	NA	NA,Rnu73b,Snord73a,Rps3a1
3	92392502	92397502	3	92507501	92512501	.	.	.	.	0,0,0	28	8.31161	8.25655	8.84585	7.12695	9	9	9	8	0.00351298	0.00361298	0.0039917	0.000247555	NA,Sprr2i,Sprr2h	NA,Sprr4
3	96935002	96940002	3	97030000	97035000	.	.	.	.	0,0,0	36	12.1043	12.1328	12.3053	11.7346	10	10	10	10	0.0359981	0.0378072	0.0409486	0.0412185	NA,Gja8	NA,Gja5,Gja5
3	100970017	100975017	3	101362502	101367502	.	.	.	.	0,0,0	26	6.51029	6.4227	9.4868	5.62781	8	8	9	7	0.000217023	0.000214713	0.0039917	9.44824e-06	NA,Ttf2	NA,Igsf3
3	101600001	101605001	3	101690019	101695019	.	.	.	.	0,0,0	34	9.30132	9.19324	10.7212	10.4768	9	9	10	10	0.00351298	0.00361298	0.0409486	0.0412185	NA,Atp1a1	NA
3	101914988	101919988	3	102059982	102064982	.	.	.	.	0,0,0	46	8.16602	8.99881	9.55899	10.1899	9	9	9	10	0.00351298	0.00361298	0.0039917	0.0412185	NA,Slc22a15	NA
3	103640011	103645011	3	103725005	103730005	.	.	.	.	0,0,0	26	11.0519	11.143	10.1153	11.1734	10	10	10	10	0.0359981	0.0378072	0.0409486	0.0412185	NA	NA,Olfml3
3	105459991	105464991	3	105639979	105644979	.	.	.	.	0,0,0	38	9.97576	10.6947	9.66646	11.1169	10	10	9	10	0.0359981	0.0378072	0.0039917	0.0412185	NA,Kcnd3,Kcnd3os,Kcnd3	NA
3	105735017	105740017	3	105909994	105914994	.	.	.	.	0,0,0	50	12.306	10.5227	9.08986	9.63405	10	10	9	9	0.0359981	0.0378072	0.0039917	0.00400034	NA	NA,Adora3
3	115660000	115665000	3	115890011	115895011	.	.	.	.	0,0,0	26	8.10633	7.77191	11.4447	10.1001	9	8	10	10	0.00351298	0.000214713	0.0409486	0.0412185	NA	NA,A930005H10Rik,A930005H10Rik,Dph5,A930005H10Rik
3	119780011	119785011	3	119945000	119950000	.	.	.	.	0,0,0	36	7.99006	8.81378	8.85032	9.21187	9	9	9	9	0.00351298	0.00361298	0.0039917	0.00400034	NA,Ptbp2,Ptbp2	NA
3	121884994	121889994	3	122049994	122054994	.	.	.	.	0,0,0	26	7.60717	8.29565	10.8788	7.54314	8	9	10	8	0.000217023	0.00361298	0.0409486	0.000247555	NA	NA,Abca4
3	124335011	124340011	3	124585000	124590000	.	.	.	.	0,0,0	26	5.01166	4.36536	3.79114	5.56333	7	6	5	7	9.37851e-06	2.73447e-07	3.91979e-09	9.44824e-06	NA	NA,1700003H04Rik
3	132799999	132804999	3	132950000	132955000	.	.	.	.	0,0,0	30	9.59921	10.7605	9.09519	12.1473	9	10	9	10	0.00351298	0.0378072	0.0039917	0.0412185	NA	NA,Npnt,Npnt,Npnt,Npnt,Npnt
3	134717497	134722497	3	135204994	135209994	.	.	.	.	0,0,0	32	9.39227	8.17591	9.51037	9.28825	9	9	9	9	0.00351298	0.00361298	0.0039917	0.00400034	NA	NA,Cenpe
3	135424994	135429994	3	135680016	135685016	.	.	.	.	0,0,0	30	8.1976	9.59218	7.18506	9.41406	9	9	8	9	0.00351298	0.00361298	0.000244761	0.00400034	NA,4930539J05Rik,Ube2d3,Cisd2,Ube2d3,Ube2d3,Ube2d3,Ube2d3,Ube2d3	NA,Nfkb1
3	136665005	136670005	3	136830005	136835005	.	.	.	.	0,0,0	34	10.7324	9.96019	11.6029	9.76698	10	10	10	9	0.0359981	0.0378072	0.0409486	0.00400034	NA,Ppp3ca,Ppp3ca	NA
3	141470002	141475002	3	141514997	141519997	.	.	.	.	0,0,0	60	9.04262	9.36168	11.3653	8.61764	9	9	10	9	0.00351298	0.00361298	0.0409486	0.00400034	NA,Unc5c,Unc5c	NA
3	141475005	141480005	3	141540005	141545005	.	.	.	.	0,0,0	38	8.67591	8.89443	11.6335	8.80428	9	9	10	9	0.00351298	0.00361298	0.0409486	0.00400034	NA,Unc5c,Unc5c	NA
3	145759994	145764994	3	145915000	145920000	.	.	.	.	0,0,0	30	11.9968	11.3112	11.8702	12.3008	10	10	10	10	0.0359981	0.0378072	0.0409486	0.0412185	NA,Ddah1	NA,Bcl10
3	152470011	152475011	3	152657502	152662502	.	.	.	.	0,0,0	26	10.5271	10.2354	9.66081	10.8488	10	10	9	10	0.0359981	0.0378072	0.0039917	0.0412185	NA	NA,AI115009,Ak5,Ak5
3	15325002	15330002	3	15460000	15465000	.	.	.	.	0,0,0	70	5.08814	5.91637	7.31555	8.03935	7	7	8	9	8.85484e-05	8.88559e-05	0.00147685	0.0154249	NA,Gm9733	NA
3	30000016	30005016	3	30449999	30454999	.	.	.	.	0,0,0	30	7.40735	7.57851	9.22215	5.12195	8	8	9	7	0.00131139	0.00138095	0.0154667	9.10705e-05	NA,Mecom	NA
3	34329997	34334997	3	34637497	34642497	.	.	.	.	0,0,0	28	6.46713	6.29203	6.53643	9.11316	8	8	8	9	0.00131139	0.00138095	0.00147685	0.0154249	NA	NA,Sox2,Mir1897
3	52104999	52109999	3	52237499	52242499	.	.	.	.	0,0,0	50	7.86958	6.31504	9.00055	9.77268	9	8	9	9	0.0137964	0.00138095	0.0154667	0.0154249	NA,Maml3	NA
3	52532518	52537518	3	52750005	52755005	.	.	.	.	0,0,0	24	8.31581	8.8248	8.80425	9.05218	9	9	9	9	0.0137964	0.0147084	0.0154667	0.0154249	NA	NA,Gm2447
3	62214999	62219999	3	62340005	62345005	.	.	.	.	0,0,0	24	10.1509	8.88337	8.41644	8.62122	10	9	9	9	0.0953865	0.0147084	0.0154667	0.0154249	NA	NA,Arhgef26
3	62349985	62354985	3	62440009	62445009	.	.	.	.	0,0,0	36	7.88243	8.04712	9.27117	9.17075	9	9	9	9	0.0137964	0.0147084	0.0154667	0.0154249	NA,Arhgef26	NA
3	69910000	69915000	3	69992507	69997507	.	.	.	.	0,0,0	26	8.45682	7.19865	6.09692	8.13892	9	8	7	9	0.0137964	0.00138095	9.42026e-05	0.0154249	NA	NA,Otol1
3	85575000	85580000	3	85679989	85684989	.	.	.	.	0,0,0	28	8.53661	7.01298	8.86451	7.38413	9	8	9	8	0.0137964	0.00138095	0.0154667	0.00147889	NA,Gatb	NA
3	86535010	86540010	3	86769984	86774984	.	.	.	.	0,0,0	24	8.9757	8.43085	8.89649	9.26468	9	9	9	9	0.0137964	0.0147084	0.0154667	0.0154249	NA,Mab21l2	NA
3	89395007	89400007	3	89494980	89499980	.	.	.	.	0,0,0	44	7.30074	6.47278	6.02881	7.48512	8	8	7	8	0.00131139	0.00138095	9.42026e-05	0.00147889	NA,Gm15417,Lenep,Gm15417,Zbtb7b,Zbtb7b,Zbtb7b,Zbtb7b,Flad1,Flad1,Flad1,Flad1	NA
3	90085010	90090010	3	90209989	90214989	.	.	.	.	0,0,0	30	10.9595	7.10103	7.26604	8.34899	10	8	8	9	0.0953865	0.00138095	0.00147685	0.0154249	NA,Tpm3,Tpm3,Tpm3,Tpm3,Tpm3,Tpm3,Tpm3	NA,Rps27,Rab13,Rps27rt,Rps27,Rab13
3	90274989	90279989	3	90465000	90470000	.	.	.	.	0,0,0	26	9.15023	7.85595	6.04026	9.82845	9	9	7	9	0.0137964	0.0147084	9.42026e-05	0.0154249	NA,Dennd4b,Mir7012,Dennd4b	NA,Ilf2,Npr1
3	104717502	104722502	3	104962497	104967497	.	.	.	.	0,0,0	24	7.02418	6.64391	8.58856	8.43499	8	8	9	9	0.00131139	0.00138095	0.0154667	0.0154249	NA	NA,Wnt2b
3	105089984	105094984	3	105449989	105454989	.	.	.	.	0,0,0	24	8.87093	7.6035	8.4048	9.32492	9	8	9	9	0.0137964	0.00138095	0.0154667	0.0154249	NA	NA,Kcnd3,Kcnd3os,Kcnd3
3	107719989	107724989	3	108040000	108045000	.	.	.	.	0,0,0	24	6.68992	8.82784	7.14303	8.48019	8	9	8	9	0.00131139	0.0147084	0.00147685	0.0154249	NA	NA,Gstm4,Gstm4
3	116654994	116659994	3	116835000	116840000	.	.	.	.	0,0,0	34	6.78637	7.38257	7.80293	9.58364	8	8	8	9	0.00131139	0.00138095	0.00147685	0.0154249	NA,Mfsd14a	NA
3	121302502	121307502	3	121757502	121762502	.	.	.	.	0,0,0	40	4.80312	4.52695	7.78118	4.39367	6	6	8	6	4.05494e-06	4.627e-06	0.00147685	3.63241e-06	NA,Alg14,Alg14	NA
3	29815000	29820000	3	30505005	30510005	.	.	.	.	0,0,0	24	3.28196	4.78495	7.87932	3.88163	5	6	9	5	2.72829e-06	5.91206e-05	0.0493812	1.9749e-06	NA	NA,Mecom,Mecom
3	30019982	30024982	3	30109994	30114994	.	.	.	.	0,0,0	34	7.72569	7.31346	7.06243	8.01181	8	8	8	9	0.00629987	0.00702475	0.00703196	0.049304	NA,Mecom	NA
3	30690010	30695010	3	30969989	30974989	.	.	.	.	0,0,0	28	7.79642	7.59668	9.7863	8.76438	8	8	9	9	0.00629987	0.00702475	0.0493812	0.049304	NA,Lrrc31	NA,Phc3,Phc3,Phc3,Phc3
3	52279984	52284984	3	52389999	52394999	.	.	.	.	0,0,0	32	6.52581	6.92206	8.37391	7.71221	8	8	9	8	0.00629987	0.00702475	0.0493812	0.00710092	NA,Foxo1	NA
3	53155010	53160010	3	53449994	53454994	.	.	.	.	0,0,0	32	8.87843	6.78398	7.3356	8.22859	9	8	8	9	0.0450188	0.00702475	0.00703196	0.049304	NA	NA,Proser1,Nhlrc3
3	59865005	59870005	3	60050005	60055005	.	.	.	.	0,0,0	24	5.89154	5.89397	5.51437	7.27173	7	7	7	8	0.000665805	0.000719886	0.000695252	0.00710092	NA,Gm8298	NA
3	62239985	62244985	3	62329990	62334990	.	.	.	.	0,0,0	26	8.94488	8.71262	6.3341	8.78358	9	9	8	9	0.0450188	0.0482933	0.00703196	0.049304	NA	NA,Arhgef26
3	65099985	65104985	3	65169995	65174995	.	.	.	.	0,0,0	30	8.47513	9.01511	9.64823	8.94503	9	9	9	9	0.0450188	0.0482933	0.0493812	0.049304	NA,Kcnab1	NA
3	67349995	67354995	3	67510000	67515000	.	.	.	.	0,0,0	22	7.02242	5.98168	7.23778	5.19541	8	7	8	7	0.00629987	0.000719886	0.00703196	0.000691176	NA	NA,Rarres1
3	67509999	67514999	3	68044997	68049997	.	.	.	.	0,0,0	26	3.50223	2.60045	2.979	4.15769	5	4	4	6	2.72829e-06	1.12385e-07	6.3239e-08	4.51999e-05	NA,Rarres1	NA
3	68465000	68470000	3	68709995	68714995	.	.	.	.	0,0,0	22	8.04429	5.50476	5.22663	8.38585	9	7	7	9	0.0450188	0.000719886	0.000695252	0.049304	NA,Schip1	NA
3	79055009	79060009	3	79130009	79135009	.	.	.	.	0,0,0	22	8.06943	8.46943	9.07586	8.12889	9	9	9	9	0.0450188	0.0482933	0.0493812	0.049304	NA	NA,Rapgef2,Rapgef2
3	80909999	80914999	3	81015004	81020004	.	.	.	.	0,0,0	24	9.36211	8.48861	8.15506	9.32	9	9	9	9	0.0450188	0.0482933	0.0493812	0.049304	NA,Glrb,Glrb,Glrb,Glrb,Glrb,Glrb,Glrb,Glrb	NA
3	81030004	81035004	3	81205004	81210004	.	.	.	.	0,0,0	40	8.14054	7.08741	8.79583	8.77536	9	8	9	9	0.0450188	0.00702475	0.0493812	0.049304	NA,Pdgfc,Pdgfc	NA
3	81030009	81035009	3	81289997	81294997	.	.	.	.	0,0,0	28	9.13536	7.8393	6.29452	7.57895	9	9	8	8	0.0450188	0.0482933	0.00703196	0.00710092	NA,Pdgfc,Pdgfc	NA
3	94535009	94540009	3	94595004	94600004	.	.	.	.	0,0,0	46	6.6569	7.19929	8.417	5.50875	8	8	9	7	0.00629987	0.00702475	0.0493812	0.000691176	NA	NA,Snx27,Snx27
3	95455009	95460009	3	95550002	95555002	.	.	.	.	0,0,0	34	9.64587	9.01874	8.86342	9.01085	9	9	9	9	0.0450188	0.0482933	0.0493812	0.049304	NA	NA,Hormad1,Hormad1,Hormad1,Hormad1
3	97395000	97400000	3	97584992	97589992	.	.	.	.	0,0,0	26	6.71984	7.02217	5.67354	8.75671	8	8	7	9	0.00629987	0.00702475	0.000695252	0.049304	NA,Olfr1402	NA
3	98674990	98679990	3	98730004	98735004	.	.	.	.	0,0,0	40	7.26634	6.93679	7.48884	8.27687	8	8	8	9	0.00629987	0.00702475	0.00703196	0.049304	NA	NA,Hsd3b2,Hsd3b2
3	100764998	100769998	3	100969982	100974982	.	.	.	.	0,0,0	22	6.93057	5.27921	8.18476	3.84304	8	7	9	5	0.00629987	0.000719886	0.0493812	1.9749e-06	NA	NA,Ttf2
3	102080000	102085000	3	102690000	102695000	.	.	.	.	0,0,0	22	6.42723	7.05928	6.41618	8.58068	8	8	8	9	0.00629987	0.00702475	0.00703196	0.049304	NA,Casq2,Casq2	NA
3	103835014	103840014	3	103985004	103990004	.	.	.	.	0,0,0	28	9.05602	9.5644	9.16618	9.43172	9	9	9	9	0.0450188	0.0482933	0.0493812	0.049304	NA,Bcl2l15,Bcl2l15	NA
3	107944990	107949990	3	108149990	108154990	.	.	.	.	0,0,0	30	5.13024	5.10767	5.05856	8.62741	7	7	7	9	0.000665805	0.000719886	0.000695252	0.049304	NA,Gstm6	NA,Gpr61,Gnai3
3	108765000	108770000	3	108835004	108840004	.	.	.	.	0,0,0	28	8.44712	8.02958	6.95118	9.39382	9	9	8	9	0.0450188	0.0482933	0.00703196	0.049304	NA	NA,Stxbp3
3	120800000	120805000	3	120885000	120890000	.	.	.	.	0,0,0	22	9.15552	8.5835	8.85206	8.13743	9	9	9	9	0.0450188	0.0482933	0.0493812	0.049304	NA	NA,6530403H02Rik
3	126790004	126795004	3	126940000	126945000	.	.	.	.	0,0,0	22	5.42833	5.92279	7.17856	6.62646	7	7	8	8	0.000665805	0.000719886	0.00703196	0.00710092	NA	NA,Ank2
3	132740004	132745004	3	133080014	133085014	.	.	.	.	0,0,0	28	7.01766	6.34426	8.85348	6.58326	8	8	9	8	0.00629987	0.00702475	0.0493812	0.00710092	NA	NA,Gstcd,Ints12,Gstcd
3	137625000	137630000	3	137749990	137754990	.	.	.	.	0,0,0	26	7.23929	5.841	7.86692	6.43942	8	7	9	8	0.00629987	0.000719886	0.0493812	0.00710092	NA,Ddit4l	NA
3	144605004	144610004	3	144714995	144719995	.	.	.	.	0,0,0	30	9.41313	8.05924	8.79085	9.80303	9	9	9	9	0.0450188	0.0482933	0.0493812	0.049304	NA	NA,Sh3glb1,Sh3glb1,Sh3glb1
3	144825000	144830000	3	145004995	145009995	.	.	.	.	0,0,0	28	7.30354	9.25013	5.27506	9.80341	8	9	7	9	0.00629987	0.0482933	0.000695252	0.049304	NA,Clca3a2	NA
3	145645004	145650004	3	145925009	145930009	.	.	.	.	0,0,0	36	7.85937	7.42668	7.42069	7.59182	9	8	8	8	0.0450188	0.00702475	0.00703196	0.00710092	NA,Cyr61	NA,2410004B18Rik,Bcl10,2410004B18Rik,2410004B18Rik,2410004B18Rik
3	146325013	146330013	3	146804995	146809995	.	.	.	.	0,0,0	22	8.25771	6.72978	6.94387	5.65634	9	8	8	7	0.0450188	0.00702475	0.00703196	0.000691176	NA	NA,Prkacb
4	62460142	62465142	4	62505000	62510000	.	.	.	.	0,0,0	122	54.6067	54.0591	58.9563	54.6799	17	17	17	17	1.42532e-05	1.60282e-05	1.67855e-05	1.72944e-05	NA,Wdr31,Wdr31,Wdr31,Wdr31	NA,Alad,Alad,Hdhd3
4	140626129	140631129	4	140668484	140673484	.	.	.	.	0,0,0	100	45.7682	47.6358	46.0684	52.7522	16	16	16	17	4.49273e-08	6.45335e-08	7.0983e-08	0.000678745	NA	NA,Arhgef10l,Arhgef10l
4	132774198	132779198	4	132820852	132825852	.	.	.	.	0,0,0	96	28.2198	29.9273	38.1524	32.5781	14	14	15	15	1.57718e-15	1.97156e-15	3.849e-10	4.11174e-10	NA,Rpa2	NA
4	137855026	137860026	4	137894973	137899973	.	.	.	.	0,0,0	82	37.5899	37.7227	34.9674	36.2921	15	15	15	15	4.4017e-07	5.51252e-07	5.73186e-07	5.90371e-07	NA,Ece1	NA
4	45480030	45485030	4	45523317	45528317	.	.	.	.	0,0,0	80	29.0991	28.5722	28.8557	37.8905	14	14	14	15	7.38593e-10	9.23167e-10	1.09438e-09	7.70693e-06	NA	NA,Shb
4	149848255	149853255	4	149953363	149958363	.	.	.	.	0,0,0	106	24.7215	29.1341	27.2625	45.9373	14	14	14	16	7.38593e-10	9.23167e-10	1.09438e-09	0.00743002	NA	NA,Spsb1
4	132357975	132362975	4	132406004	132411004	.	.	.	.	0,0,0	76	43.3045	39.6168	38.4479	47.7053	16	16	15	16	0.0117054	0.0135774	2.52089e-05	0.0161365	NA,Rcc1,Snhg3,Rcc1	NA,Phactr4,Phactr4
4	136840037	136845037	4	136880000	136885000	.	.	.	.	0,0,0	76	45.2335	39.6636	44.5997	35.5474	16	16	16	15	0.0117054	0.0135774	0.0158292	2.60038e-05	NA,Ephb2,Ephb2	NA,C1qc,C1qb
4	155145073	155150073	4	155215000	155220000	.	.	.	.	0,0,0	76	30.3968	36.0182	40.1048	47.8349	14	15	16	16	3.9216e-09	2.46051e-05	0.0158292	0.0161365	NA	NA,Ski,Ski
4	155179963	155184963	4	155215018	155220018	.	.	.	.	0,0,0	76	34.9253	34.7901	31.8235	37.4623	15	15	15	15	1.95908e-05	2.46051e-05	2.52089e-05	2.60038e-05	NA	NA,Ski,Ski
4	40955000	40960000	4	40990035	40995035	.	.	.	.	0,0,0	74	33.3963	38.4419	41.8266	33.5501	15	15	16	15	6.29043e-05	7.80087e-05	0.032103	8.46979e-05	NA,Nfx1,Nfx1,Bag1,Chmp5,Bag1,Nfx1	NA,Mir3094
4	119626688	119631688	4	119668327	119673327	.	.	.	.	0,0,0	74	29.0029	23.189	29.1834	24.1579	14	13	14	13	2.00884e-08	1.41023e-12	2.95884e-08	2.00414e-12	NA,Guca2a	NA,Guca2b
4	133842483	133847483	4	133884932	133889932	.	.	.	.	0,0,0	74	38.073	34.5605	41.4549	35.1572	15	15	16	15	6.29043e-05	7.80087e-05	0.032103	8.46979e-05	NA	NA,Rps6ka1,Rps6ka1,Rps6ka1
4	41525032	41530032	4	41609967	41614967	.	.	.	.	0,0,0	72	29.3196	29.8415	32.3655	38.2683	14	14	15	15	9.70368e-08	1.21312e-07	0.000251392	0.000259571	NA,1110017D15Rik,Fam219aos,1110017D15Rik,1110017D15Rik,1110017D15Rik	NA
4	133253282	133258282	4	133295030	133300030	.	.	.	.	0,0,0	82	38.584	35.9896	37.8221	38.245	15	15	15	15	0.000192337	0.000235937	0.000251392	0.000259571	NA,Map3k6,Sytl1	NA
4	123620057	123625057	4	123658371	123663371	.	.	.	.	0,0,0	70	33.0438	36.1121	33.1576	38.3938	15	15	15	15	0.000544764	0.0006569	0.000716992	0.000740405	NA,Mir6398	NA,Gm12925
4	44969986	44974986	4	45005013	45010013	.	.	.	.	0,0,0	84	24.3369	20.8958	20.3838	28.6442	13	13	13	14	5.18257e-10	4.9858e-10	7.08045e-10	2.6784e-06	NA,Grhpr,Grhpr	NA,Zbtb5,Polr1e,Polr1e,Zbtb5,Zbtb5
4	62613383	62618383	4	62689904	62694904	.	.	.	.	0,0,0	78	24.8754	24.3894	25.3086	35.9544	14	13	14	15	1.8701e-06	4.9858e-10	2.63979e-06	0.00200874	NA,Rgs3,Rgs3	NA
4	134305000	134310000	4	134349973	134354973	.	.	.	.	0,0,0	68	31.6321	35.3842	37.3724	32.6758	15	15	15	15	0.00147209	0.001744	0.00193476	0.00200874	NA,Trim63	NA,Slc30a2,Slc30a2
4	43377486	43382486	4	43414999	43419999	.	.	.	.	0,0,0	72	30.9419	26.5026	27.8693	31.4272	15	14	14	15	0.0036945	9.37923e-06	1.04601e-05	0.00505609	NA,Rusc2	NA,Rusc2,Fam166b,Fam166b
4	108337486	108342486	4	108491206	108496206	.	.	.	.	0,0,0	66	17.066	13.5074	30.6293	9.86412	12	11	14	10	4.03102e-13	1.3313e-17	1.04601e-05	6.06627e-22	NA,Coa7	NA
4	124979999	124984999	4	125018365	125023365	.	.	.	.	0,0,0	66	29.694	33.2752	29.1212	37.6252	14	15	14	15	7.55894e-06	0.00432547	1.04601e-05	0.00505609	NA,Rspo1	NA,Gnl2
4	135719951	135724951	4	135754951	135759951	.	.	.	.	0,0,0	74	30.1733	35.7745	33.5939	34.2223	14	15	15	15	7.55894e-06	0.00432547	0.00489899	0.00505609	NA,Il22ra1	NA,Myom3
4	118249977	118254977	4	118287488	118292488	.	.	.	.	0,0,0	72	30.4022	28.7183	32.0963	31.7195	14	14	15	15	2.8116e-05	3.47663e-05	0.0115155	0.0119447	NA	NA,Ptprf
4	130671647	130676647	4	130714954	130719954	.	.	.	.	0,0,0	108	30.1445	32.4679	38.2544	32.8308	14	15	15	15	2.8116e-05	0.00990835	0.0115155	0.0119447	NA,Pum1,Pum1,Pum1,Pum1,Pum1,Pum1,Pum1,Pum1	NA
4	141272474	141277474	4	141312503	141317503	.	.	.	.	0,0,0	76	38.3191	34.3516	38.3909	30.4605	15	15	15	14	0.00863004	0.00990835	0.0115155	3.97569e-05	NA,Gm13056	NA,Epha2
4	155009942	155014942	4	155054978	155059978	.	.	.	.	0,0,0	64	23.3723	26.5426	25.0647	31.5125	13	14	14	15	1.90236e-08	3.47663e-05	3.90146e-05	0.0119447	NA,Plch2,Plch2,Plch2	NA,Pex10
4	117047510	117052510	4	117085031	117090031	.	.	.	.	0,0,0	62	30.4847	34.7104	28.817	32.3418	14	15	14	15	9.71061e-05	0.0213931	0.000135863	0.0264397	NA	NA,Ptch2,Ptch2
4	118410020	118415020	4	118564938	118569938	.	.	.	.	0,0,0	62	22.8117	19.6463	14.0291	36.8853	13	13	11	15	1.0447e-07	1.05436e-07	4.6767e-15	0.0264397	NA,Med8,Med8,Med8,Szt2	NA
4	132037464	132042464	4	132074979	132079979	.	.	.	.	0,0,0	72	20.6287	22.872	21.9052	28.0477	13	13	13	14	1.0447e-07	1.05436e-07	1.48217e-07	0.000138322	NA,Epb41	NA,Epb41,Epb41
4	132095000	132100000	4	132135026	132140026	.	.	.	.	0,0,0	88	24.7457	26.1282	28.5009	26.5846	14	14	14	14	9.71061e-05	0.000119655	0.000135863	0.000138322	NA	NA,Oprd1
4	152347470	152352470	4	152384999	152389999	.	.	.	.	0,0,0	62	23.5464	34.7268	32.4475	27.1379	13	15	15	14	1.0447e-07	0.0213931	0.0256062	0.000138322	NA,Chd5,Chd5	NA
4	141148302	141153302	4	141214981	141219981	.	.	.	.	0,0,0	60	21.1282	22.6153	27.225	19.5189	13	13	14	12	5.37625e-07	5.50919e-07	0.000446413	3.36723e-10	NA,Szrd1,Szrd1,Szrd1,Fbxo42,Szrd1	NA,Rsg1
4	150290017	150295017	4	150330017	150335017	.	.	.	.	0,0,0	60	30.8269	32.1306	31.4077	33.2395	14	15	15	15	0.000315754	0.0441069	0.0533244	0.055271	NA,Rere	NA
4	150918315	150923315	4	150959994	150964994	.	.	.	.	0,0,0	60	30.303	25.3611	29.5203	28.9326	14	14	14	14	0.000315754	0.000387068	0.000446413	0.000448046	NA,Tnfrsf9,Tnfrsf9,Park7,Tnfrsf9	NA
4	33151206	33156206	4	33198756	33203756	.	.	.	.	0,0,0	64	17.0048	18.4724	20.9238	19.8636	12	12	13	13	2.00439e-09	1.74819e-09	3.67658e-06	3.61933e-06	NA	NA,Srsf12,Srsf12,Pm20d2
4	46144947	46149947	4	46180034	46185034	.	.	.	.	0,0,0	58	26.5652	22.1238	25.4334	24.7701	14	13	14	14	0.000956817	2.69855e-06	0.00137067	0.00137378	NA,Tstd2,Tstd2,Tstd2,Ncbp1	NA,Xpa
4	137234948	137239948	4	137275017	137280017	.	.	.	.	0,0,0	62	27.409	28.3357	29.4632	29.724	14	14	14	14	0.000956817	0.00118414	0.00137067	0.00137378	NA	NA,Wnt4
4	46529967	46534967	4	46594999	46599999	.	.	.	.	0,0,0	56	25.924	23.7894	26.9501	28.8544	14	13	14	14	0.00268484	1.21293e-05	0.00385165	0.00385202	NA,Trim14,Gm16731	NA,Coro2a
4	48629991	48634991	4	48674959	48679959	.	.	.	.	0,0,0	60	25.424	23.3258	19.8632	27.1309	14	13	13	14	0.00268484	1.21293e-05	1.63764e-05	0.00385202	NA	NA,Cavin4
4	134085000	134090000	4	134124984	134129984	.	.	.	.	0,0,0	62	26.3952	23.486	24.1695	22.2625	14	13	13	13	0.00268484	1.21293e-05	1.63764e-05	1.61125e-05	NA,Cd52	NA,Sh3bgrl3
4	135675037	135680037	4	135767484	135772484	.	.	.	.	0,0,0	58	21.5211	18.2533	16.7538	21.7342	13	12	12	13	1.15321e-05	1.23176e-08	1.82403e-08	1.61125e-05	NA,Ifnlr1	NA,Myom3
4	136378306	136383306	4	136420031	136425031	.	.	.	.	0,0,0	56	25.6268	28.5773	30.5578	30.627	14	14	14	14	0.00268484	0.0032834	0.00385165	0.00385202	NA	NA,Htr1d,Htr1d,Htr1d,Htr1d
4	136650000	136655000	4	136879984	136884984	.	.	.	.	0,0,0	80	26.6564	14.8737	20.2791	16.5339	14	11	13	12	0.00268484	4.76102e-12	1.63764e-05	1.78741e-08	NA	NA,C1qc,C1qb
4	107429976	107434976	4	107630038	107635038	.	.	.	.	0,0,0	66	16.6258	21.6972	23.6822	22.698	12	13	13	13	9.15139e-08	5.0634e-05	6.72711e-05	6.7155e-05	NA,Glis1	NA
4	118094985	118099985	4	118130014	118135014	.	.	.	.	0,0,0	54	28.5519	22.4608	30.7055	23.3557	14	13	14	13	0.00702877	5.0634e-05	0.0101081	6.7155e-05	NA	NA,St3gal3,St3gal3,St3gal3,St3gal3
4	124749975	124754975	4	124785029	124790029	.	.	.	.	0,0,0	54	18.6767	20.9877	21.8332	20.8612	12	13	13	13	9.15139e-08	5.0634e-05	6.72711e-05	6.7155e-05	NA,Mir698,Gm12915,Inpp5b,Inpp5b	NA
4	130295000	130300000	4	130344970	130349970	.	.	.	.	0,0,0	60	27.4854	25.8946	27.1352	24.0939	14	14	14	13	0.00702877	0.00848507	0.0101081	6.7155e-05	NA,Fabp3	NA,Zcchc17,Zcchc17,Snrnp40,Zcchc17,Zcchc17,Zcchc17,Zcchc17
4	133347521	133352521	4	133422449	133427449	.	.	.	.	0,0,0	54	20.9243	24.8493	27.2389	27.3273	13	14	14	14	4.76276e-05	0.00848507	0.0101081	0.0100593	NA,Wdtc1	NA
4	141430007	141435007	4	141572471	141577471	.	.	.	.	0,0,0	74	15.4148	17.0525	19.9162	29.1585	11	12	13	14	6.73791e-11	8.14775e-08	6.72711e-05	0.0100593	NA,Zbtb17,Hspb7,Srarp	NA
4	147914985	147919985	4	148007550	148012550	.	.	.	.	0,0,0	54	13.7139	14.6398	12.6967	20.651	11	11	11	13	6.73791e-11	5.00592e-11	7.81963e-11	6.7155e-05	NA,Mfn2,Mfn2,Mfn2,Mfn2,Mfn2,Mfn2,Mfn2	NA,Nppa
4	150660000	150665000	4	150700014	150705014	.	.	.	.	0,0,0	66	27.3843	25.1644	26.5542	28.8031	14	14	14	14	0.00702877	0.00848507	0.0101081	0.0100593	NA,Slc45a1,Slc45a1	NA
4	43939959	43944959	4	43994970	43999970	.	.	.	.	0,0,0	114	26.2918	29.7192	26.714	26.8966	14	14	14	14	0.0171209	0.0202867	0.0242977	0.024324	NA	NA,Clta,Ccin
4	48476416	48481416	4	48547859	48552859	.	.	.	.	0,0,0	52	22.0026	24.4255	25.288	29.6399	13	13	14	14	0.000179309	0.00019367	0.0242977	0.024324	NA,Tex10,Tex10,Tex10	NA,Msantd3,Msantd3,Msantd3
4	59635009	59640009	4	59670023	59675023	.	.	.	.	0,0,0	54	23.3261	29.6733	26.7297	25.3249	13	14	14	14	0.000179309	0.0202867	0.0242977	0.024324	NA,E130308A19Rik,E130308A19Rik	NA
4	124717493	124722493	4	124794973	124799973	.	.	.	.	0,0,0	52	21.7521	21.891	26.2548	23.0476	13	13	14	13	0.000179309	0.00019367	0.0242977	0.000255018	NA,Sf3a3,Mir697	NA,Mtf1
4	129138329	129143329	4	129176674	129181674	.	.	.	.	0,0,0	62	23.5071	21.8738	26.4649	22.7217	13	13	14	13	0.000179309	0.00019367	0.0242977	0.000255018	NA,Fndc5	NA,S100pbp,S100pbp,S100pbp,Yars
4	129347496	129352496	4	129405000	129410000	.	.	.	.	0,0,0	66	19.8208	24.3859	30.6	24.2998	13	13	14	13	0.000179309	0.00019367	0.0242977	0.000255018	NA,Zbtb8os,Rbbp4	NA
4	130795026	130800026	4	130830026	130835026	.	.	.	.	0,0,0	52	19.2004	20.721	23.8096	18.7721	12	13	13	12	5.51969e-07	0.00019367	0.000257224	7.06697e-07	NA,Sdc3	NA
4	137985006	137990006	4	138104993	138109993	.	.	.	.	0,0,0	60	19.5774	17.1447	24.4048	20.5197	13	12	13	13	0.000179309	5.03044e-07	0.000257224	0.000255018	NA,Eif4g3,Eif4g3,Eif4g3,Eif4g3,Eif4g3	NA
4	138705006	138710006	4	138745000	138750000	.	.	.	.	0,0,0	66	26.1392	21.2942	25.7975	23.7576	14	13	14	13	0.0171209	0.00019367	0.0242977	0.000255018	NA	NA,Ubxn10,Ubxn10,Pla2g2f,Pla2g2f
4	152442480	152447480	4	152492532	152497532	.	.	.	.	0,0,0	52	19.822	18.2664	18.8778	18.9995	13	12	12	12	0.000179309	5.03044e-07	7.20484e-07	7.06697e-07	NA,Kcnab2,Kcnab2,Kcnab2	NA
4	3871258	3876258	4	3922488	3927488	.	.	.	.	0,0,0	62	21.2933	22.0846	20.5082	30.4799	13	13	13	14	0.000624846	0.000684552	0.000899735	0.0540063	NA,Mos	NA,Chchd7,Chchd7,Chchd7,Chchd7,Chchd7,Chchd7,Chchd7,Plag1,Chchd7,Chchd7
4	63499974	63504974	4	63545033	63550033	.	.	.	.	0,0,0	50	26.4157	25.5354	26.6258	30.8836	14	14	14	14	0.0381449	0.0444927	0.0539207	0.0540063	NA,Whrn,Whrn,Whrn,Whrn,Whrn	NA,Atp6v1g1,Tmem268,Tmem268,Tmem268
4	108263734	108268734	4	108312523	108317523	.	.	.	.	0,0,0	54	29.5022	26.6753	26.988	27.4403	14	14	14	14	0.0381449	0.0444927	0.0539207	0.0540063	NA	NA,Coa7,Zyg11b
4	110295012	110300012	4	110335012	110340012	.	.	.	.	0,0,0	50	19.3818	16.9542	18.5188	15.291	12	12	12	11	3.0288e-06	2.8171e-06	3.96515e-06	6.24829e-09	NA,Elavl4,Elavl4,Elavl4,Elavl4,Elavl4	NA,Elavl4
4	120635000	120640000	4	120670000	120675000	.	.	.	.	0,0,0	54	25.7551	30.0868	30.6457	28.5054	14	14	14	14	0.0381449	0.0444927	0.0539207	0.0540063	NA	NA,Cited4
4	134183352	134188352	4	134288325	134293325	.	.	.	.	0,0,0	60	16.1199	15.6308	17.5153	19.4119	12	12	12	12	3.0288e-06	2.8171e-06	3.96515e-06	3.89698e-06	NA,Cep85	NA,Pdik1l,Pdik1l
4	134575023	134580023	4	134629976	134634976	.	.	.	.	0,0,0	58	20.7823	23.5566	26.1467	24.544	13	13	14	13	0.000624846	0.000684552	0.0539207	0.000891467	NA,Mir6403	NA
4	136069999	136074999	4	136200023	136205023	.	.	.	.	0,0,0	50	15.9352	17.0903	26.4955	13.9115	12	12	14	11	3.0288e-06	2.8171e-06	0.0539207	6.24829e-09	NA	NA,Asap3,Asap3
4	138105000	138110000	4	138157488	138162488	.	.	.	.	0,0,0	58	24.1903	26.4534	26.7226	29.2916	13	14	14	14	0.000624846	0.0444927	0.0539207	0.0540063	NA	NA,Mir6399
4	138749995	138754995	4	138785016	138790016	.	.	.	.	0,0,0	62	28.1022	25.9671	28.04	29.3855	14	14	14	14	0.0381449	0.0444927	0.0539207	0.0540063	NA,Ubxn10,Pla2g2f,Pla2g2f	NA,Pla2g2d,Pla2g2d
4	139640011	139645011	4	139675011	139680011	.	.	.	.	0,0,0	68	25.0729	20.1657	27.3001	21.9653	14	13	14	13	0.0381449	0.000684552	0.0539207	0.000891467	NA,Mir7020,Tas1r2	NA
4	149750017	149755017	4	149802488	149807488	.	.	.	.	0,0,0	58	25.3531	23.8706	24.7372	28.7512	14	13	14	14	0.0381449	0.000684552	0.0539207	0.0540063	NA,Tmem201,Tmem201,Tmem201	NA
4	154064988	154069988	4	154102505	154107505	.	.	.	.	0,0,0	50	22.7767	21.4521	23.1658	22.2436	13	13	13	13	0.000624846	0.000684552	0.000899735	0.000891467	NA	NA,Trp73,Trp73
4	106994989	106999989	4	107162494	107167494	.	.	.	.	0,0,0	46	19.5395	14.9269	13.438	22.3097	12	11	11	13	7.0485e-05	2.53231e-07	3.66383e-07	0.00826849	NA	NA,Tmem59,Tceanc2
4	123764969	123769969	4	123809984	123814984	.	.	.	.	0,0,0	58	23.8586	22.6834	24.5591	24.0144	13	13	13	13	0.0057497	0.00644834	0.00827338	0.00826849	NA	NA,Rhbdl2
4	149164979	149169979	4	149230000	149235000	.	.	.	.	0,0,0	46	19.3842	20.6547	22.2339	22.0171	12	13	13	13	7.0485e-05	0.00644834	0.00827338	0.00826849	NA,Pgd,Pgd	NA
4	152049979	152054979	4	152094999	152099999	.	.	.	.	0,0,0	60	18.342	20.8042	24.2833	22.3094	12	13	13	13	7.0485e-05	0.00644834	0.00827338	0.00826849	NA,Nol9,Tas1r1,Nol9,Nol9	NA,Plekhg5,Plekhg5
4	154442499	154447499	4	154625018	154630018	.	.	.	.	0,0,0	50	13.5421	16.3695	19.6251	20.3557	11	12	13	13	3.21072e-07	6.90113e-05	0.00827338	0.00826849	NA	NA,Prdm16,Prdm16,Prdm16,5930403L14Rik,Prdm16
4	154925009	154930009	4	154995009	155000009	.	.	.	.	0,0,0	46	17.1442	18.8736	20.0474	19.4727	12	12	13	12	7.0485e-05	6.90113e-05	0.00827338	9.20132e-05	NA,Tnfrsf14	NA,Plch2,Plch2
4	154980009	154985009	4	155015029	155020029	.	.	.	.	0,0,0	60	20.7564	23.3605	23.5532	19.4315	13	13	13	12	0.0057497	0.00644834	0.00827338	9.20132e-05	NA	NA,Plch2,Plch2,Plch2
4	155719994	155724994	4	155771654	155776654	.	.	.	.	0,0,0	68	18.8446	18.678	20.6968	18.4241	12	12	13	12	7.0485e-05	6.90113e-05	0.00827338	9.20132e-05	NA,Tmem240	NA,Tmem88b,Atad3aos,Vwa1,Atad3a,Atad3aos
4	33124990	33129990	4	33200029	33205029	.	.	.	.	0,0,0	64	15.7652	15.7002	17.4146	20.6564	12	12	12	13	0.000293111	0.000295744	0.000389273	0.0219071	NA,Gabrr1	NA,Srsf12,Srsf12,Pm20d2
4	45199980	45204980	4	45244980	45249980	.	.	.	.	0,0,0	44	22.8163	23.2308	24.5068	23.2542	13	13	13	13	0.0152065	0.017148	0.0217121	0.0219071	NA	NA,Frmpd1os
4	45780004	45785004	4	45849999	45854999	.	.	.	.	0,0,0	60	16.2772	17.0172	19.1294	21.1698	12	12	12	13	0.000293111	0.000295744	0.000389273	0.0219071	NA	NA,Stra6l,Stra6l
4	56964990	56969990	4	56999990	57004990	.	.	.	.	0,0,0	58	19.6875	24.2528	22.0079	21.803	13	13	13	13	0.0152065	0.017148	0.0217121	0.0219071	NA	NA,Frrs1l
4	57994977	57999977	4	58069993	58074993	.	.	.	.	0,0,0	44	17.9338	18.5845	17.8471	21.52	12	12	12	13	0.000293111	0.000295744	0.000389273	0.0219071	NA,Txndc8	NA
4	58555000	58560000	4	58635019	58640019	.	.	.	.	0,0,0	44	16.4099	15.9906	14.848	13.7794	12	12	11	11	0.000293111	0.000295744	2.44656e-06	2.40808e-06	NA,Lpar1,Lpar1	NA
4	101162526	101167526	4	101259980	101264980	.	.	.	.	0,0,0	52	23.121	19.7101	23.6971	22.4425	13	13	13	13	0.0152065	0.017148	0.0217121	0.0219071	NA	NA,Jak1
4	115850000	115855000	4	115894981	115899981	.	.	.	.	0,0,0	50	21.8437	20.5858	22.672	18.1613	13	13	13	12	0.0152065	0.017148	0.0217121	0.000387596	NA,Mknk1,Mknk1,Mknk1,Mknk1	NA,6430628N08Rik,Kncn,Kncn
4	120382501	120387501	4	120517514	120522514	.	.	.	.	0,0,0	44	17.8176	16.5123	23.2369	13.0721	12	12	13	11	0.000293111	0.000295744	0.0217121	2.40808e-06	NA	NA,Slfnl1
4	135355006	135360006	4	135395025	135400025	.	.	.	.	0,0,0	78	18.7155	21.8632	22.5131	18.3745	12	13	13	12	0.000293111	0.017148	0.0217121	0.000387596	NA,Srrm1,Srrm1	NA,Ncmap,Ncmap,Ncmap,Ncmap,Ncmap,Ncmap
4	45535014	45540014	4	45580002	45585002	.	.	.	.	0,0,0	60	24.4563	21.4879	20.497	18.9312	13	13	13	12	0.0365944	0.0411484	0.0516631	0.00144164	NA,Shb	NA
4	82965000	82970000	4	83004991	83009991	.	.	.	.	0,0,0	60	18.477	18.4762	15.2955	18.5142	12	12	11	12	0.00109074	0.00113134	1.4655e-05	0.00144164	NA	NA,Frem1,Frem1
4	129159983	129164983	4	129319974	129324974	.	.	.	.	0,0,0	42	22.743	17.3826	14.142	20.4173	13	12	11	13	0.0365944	0.00113134	1.4655e-05	0.0521681	NA	NA,Zbtb8os,Rbbp4
4	129520000	129525000	4	129580016	129585016	.	.	.	.	0,0,0	46	17.0636	20.6792	17.3791	19.7948	12	13	12	13	0.00109074	0.0411484	0.00146086	0.0521681	NA,Marcksl1	NA,Fam167b,Lck
4	135799987	135804987	4	135920016	135925016	.	.	.	.	0,0,0	42	10.4	13.2627	21.2329	13.275	10	11	13	11	5.7751e-08	1.04956e-05	0.0516631	1.43615e-05	NA	NA,Cnr2,Fuca1
4	137165011	137170011	4	137214997	137219997	.	.	.	.	0,0,0	70	16.8664	18.1273	18.6919	20.6151	12	12	12	13	0.00109074	0.00113134	0.00146086	0.0521681	NA,Gm13003	NA
4	141400000	141405000	4	141460016	141465016	.	.	.	.	0,0,0	52	12.5497	14.7122	20.1845	15.4466	11	11	13	11	1.24015e-05	1.04956e-05	0.0516631	1.43615e-05	NA,Clcnka,Clcnkb,Clcnka	NA
4	143257495	143262495	4	143295000	143300000	.	.	.	.	0,0,0	58	23.8042	22.5902	22.7909	23.8979	13	13	13	13	0.0365944	0.0411484	0.0516631	0.0521681	NA	NA,Pdpn,Pdpn
4	146055000	146060000	4	147515004	147520004	.	.	.	.	0,0,0	56	7.17564	5.63232	15.3345	11.6577	8	7	11	10	2.39267e-13	2.07875e-16	1.4655e-05	6.79432e-08	NA,Gm13034	NA
4	146055000	146060000	4	147595000	147600000	.	.	.	.	0,0,0	54	16.1037	4.82713	11.481	11.3473	12	6	10	10	0.00109074	1.33551e-19	6.6567e-08	6.79432e-08	NA,Gm13034	NA
4	149169975	149174975	4	149305000	149310000	.	.	.	.	0,0,0	42	19.7201	19.656	18.3104	20.225	13	13	12	13	0.0365944	0.0411484	0.00146086	0.0521681	NA,Pgd,Pgd	NA,Kif1b,Kif1b,Kif1b
4	150015028	150020028	4	150094990	150099990	.	.	.	.	0,0,0	128	19.3801	16.5907	11.9161	23.9027	12	12	10	13	0.00109074	0.00113134	6.6567e-08	0.0521681	NA,H6pd,H6pd	NA,Gpr157
4	150809975	150814975	4	150849999	150854999	.	.	.	.	0,0,0	42	22.2327	22.2081	21.9889	17.3745	13	13	13	12	0.0365944	0.0411484	0.0516631	0.00144164	NA	NA,1700045H11Rik,Errfi1,Errfi1
4	46390000	46395000	4	46490000	46495000	.	.	.	.	0,0,0	40	13.1686	13.643	19.3388	12.4239	11	11	12	11	6.52467e-05	5.79125e-05	0.0048989	7.78082e-05	NA,Trmo,Trmo,Hemgn	NA,Nans
4	126425000	126430000	4	126465000	126470000	.	.	.	.	0,0,0	58	18.4902	17.3656	14.4052	17.8219	12	12	11	12	0.00368742	0.00388347	7.84691e-05	0.0048709	NA,Ago3	NA,Ago1,Ago1,Ago1
4	139494992	139499992	4	139614984	139619984	.	.	.	.	0,0,0	50	9.31282	12.8191	10.6696	18.8974	9	11	10	12	2.05822e-09	5.79125e-05	5.593e-07	0.0048709	NA	NA,Aldh4a1
4	140850007	140855007	4	140885015	140890015	.	.	.	.	0,0,0	52	18.9852	20.4828	18.9334	18.4071	12	13	12	12	0.00368742	0.0896136	0.0048989	0.0048709	NA,Padi1	NA,4930515B02Rik
4	141979984	141984984	4	142135007	142140007	.	.	.	.	0,0,0	40	22.8767	16.2748	15.7741	14.0853	13	12	12	11	0.0800953	0.00388347	0.0048989	7.78082e-05	NA,Fhad1os1	NA
4	144880011	144885011	4	145159988	145164988	.	.	.	.	0,0,0	58	10.8527	7.9127	12.6267	5.7851	10	9	11	7	4.90633e-07	1.51739e-09	7.84691e-05	7.99832e-15	NA,Dhrs3,Dhrs3,Dhrs3,Dhrs3,Dhrs3,Dhrs3	NA
4	148105004	148110004	4	148434997	148439997	.	.	.	.	0,0,0	40	9.29326	8.69191	12.0805	9.94796	9	9	10	10	2.05822e-09	1.51739e-09	5.593e-07	5.83388e-07	NA	NA,Mtor,Ubiad1
4	153374977	153379977	4	153479992	153484992	.	.	.	.	0,0,0	40	18.9007	16.4119	13.8867	19.4143	12	12	11	12	0.00368742	0.00388347	7.84691e-05	0.0048709	NA	NA,Ajap1
4	70450002	70455002	4	70530002	70535002	.	.	.	.	0,0,0	52	14.4974	15.8495	18.544	19.0677	11	12	12	12	0.000309348	0.0119182	0.0147779	0.0147251	NA	NA,Megf9
4	82059977	82064977	4	82094985	82099985	.	.	.	.	0,0,0	38	16.3329	16.1075	14.1676	17.1373	12	12	11	12	0.0111176	0.0119182	0.00037403	0.0147251	NA,Gm5860,Gm11264	NA
4	106249974	106254974	4	106374992	106379992	.	.	.	.	0,0,0	66	14.1759	14.9384	17.7168	18.4911	11	11	12	12	0.000309348	0.000287016	0.0147779	0.0147251	NA,Gm12724	NA
4	106745008	106750008	4	106822503	106827503	.	.	.	.	0,0,0	56	14.8442	13.0093	15.1878	16.9131	11	11	11	12	0.000309348	0.000287016	0.00037403	0.0147251	NA,Fam151a	NA
4	108695000	108700000	4	108855014	108860014	.	.	.	.	0,0,0	38	8.11519	9.02522	11.0317	9.64294	9	9	10	9	2.44826e-08	1.83545e-08	4.27537e-06	2.8859e-08	NA	NA,Kti12
4	116174992	116179992	4	116215002	116220002	.	.	.	.	0,0,0	88	18.7593	18.8243	18.2603	18.8573	12	12	12	12	0.0111176	0.0119182	0.0147779	0.0147251	NA,1700042G07Rik,Tspan1	NA,Pik3r3,Pik3r3,Pik3r3,Pik3r3
4	117675007	117680007	4	117715000	117720000	.	.	.	.	0,0,0	54	10.4083	13.3009	3.95877	19.324	10	11	6	12	3.68718e-06	0.000287016	3.89759e-16	0.0147251	NA,Dmap1	NA
4	124525000	124530000	4	124655021	124660021	.	.	.	.	0,0,0	38	12.453	12.1075	13.1016	17.5728	11	10	11	12	0.000309348	3.05739e-06	0.00037403	0.0147251	NA	NA,Pou3f1
4	126965007	126970007	4	127014985	127019985	.	.	.	.	0,0,0	48	12.1204	11.4203	13.676	9.21432	10	10	11	9	3.68718e-06	3.05739e-06	0.00037403	2.8859e-08	NA,Zmym4,Zmym4	NA,Sfpq,Sfpq
4	132369992	132374992	4	132500021	132505021	.	.	.	.	0,0,0	38	12.0469	15.8232	16.4147	18.5882	10	12	12	12	3.68718e-06	0.0119182	0.0147779	0.0147251	NA	NA,Sesn2
4	133130007	133135007	4	133194988	133199988	.	.	.	.	0,0,0	76	18.0175	16.806	17.7552	19.2142	12	12	12	12	0.0111176	0.0119182	0.0147779	0.0147251	NA,Wasf2	NA,Mir7017
4	139125021	139130021	4	139250014	139255014	.	.	.	.	0,0,0	46	12.9333	16.0177	18.4886	18.2791	11	12	12	12	0.000309348	0.0119182	0.0147779	0.0147251	NA,Minos1,Minos1	NA
4	32240000	32245000	4	32556269	32561269	.	.	.	.	0,0,0	42	15.0009	10.544	15.3534	11.5848	11	10	11	10	0.00129874	2.10581e-05	0.00157772	2.91867e-05	NA	NA,Bach2os
4	47145013	47150013	4	47219986	47224986	.	.	.	.	0,0,0	40	13.9799	16.9417	17.1851	17.424	11	12	12	12	0.00129874	0.0322078	0.0390663	0.0392094	NA	NA,Col15a1
4	48585002	48590002	4	48670006	48675006	.	.	.	.	0,0,0	42	12.3481	11.7743	14.0924	15.3758	10	10	11	11	2.46826e-05	2.10581e-05	0.00157772	0.00154596	NA,Tmeff1,Tmeff1	NA,Cavin4
4	57785006	57790006	4	57835006	57840006	.	.	.	.	0,0,0	36	16.8577	18.0657	15.3413	18.2487	12	12	11	12	0.0296973	0.0322078	0.00157772	0.0392094	NA	NA,Akap2,Akap2
4	98740003	98745003	4	98795013	98800013	.	.	.	.	0,0,0	40	11.4686	12.3021	14.0912	13.0839	10	10	11	11	2.46826e-05	2.10581e-05	0.00157772	0.00154596	NA	NA,Kank4os
4	100777499	100782499	4	100982500	100987500	.	.	.	.	0,0,0	44	16.4036	15.0472	18.9096	18.8018	12	11	12	12	0.0296973	0.00125832	0.0390663	0.0392094	NA,Cachd1	NA
4	107239993	107244993	4	107325006	107330006	.	.	.	.	0,0,0	54	17.4886	18.6573	18.6616	18.1474	12	12	12	12	0.0296973	0.0322078	0.0390663	0.0392094	NA,Hspb11,Lrrc42,Hspb11,Hspb11	NA,Yipf1,Yipf1
4	108074980	108079980	4	108122503	108127503	.	.	.	.	0,0,0	52	15.6187	16.2012	12.3589	15.8935	12	12	10	12	0.0296973	0.0322078	2.8219e-05	0.0392094	NA,Mir6397	NA,Scp2
4	108589986	108594986	4	108634986	108639986	.	.	.	.	0,0,0	44	16.0154	14.398	18.1497	12.703	12	11	12	11	0.0296973	0.00125832	0.0390663	0.00154596	NA,Prpf38a,Orc1	NA
4	115890013	115895013	4	116000000	116005000	.	.	.	.	0,0,0	62	15.9011	11.7303	15.1215	11.3529	12	10	11	10	0.0296973	2.10581e-05	0.00157772	2.91867e-05	NA,6430628N08Rik,Kncn,Kncn	NA
4	138002503	138007503	4	138087490	138092490	.	.	.	.	0,0,0	36	18.2956	18.9975	18.6307	15.3382	12	12	12	11	0.0296973	0.0322078	0.0390663	0.00154596	NA,Eif4g3,Eif4g3,Eif4g3,Eif4g3,Eif4g3	NA
4	139205003	139210003	4	139240012	139245012	.	.	.	.	0,0,0	50	17.6832	19.3199	17.9136	19.4747	12	12	12	12	0.0296973	0.0322078	0.0390663	0.0392094	NA,Capzb,Capzb,Capzb	NA
4	150287483	150292483	4	150447490	150452490	.	.	.	.	0,0,0	42	12.6705	16.3659	12.7398	17.2349	11	12	11	12	0.00129874	0.0322078	0.00157772	0.0392094	NA,Rere	NA
4	11017496	11022496	4	11172509	11177509	.	.	.	.	0,0,0	34	10.1595	9.90926	10.5215	14.773	10	10	10	11	0.000143123	0.000128458	0.000166057	0.00569329	NA,Plekhf2	NA
4	11770000	11775000	4	11857484	11862484	.	.	.	.	0,0,0	34	14.1882	15.8554	17.4493	17.9095	11	12	12	12	0.00477156	0.0770009	0.0921578	0.0928797	NA,Cdh17	NA
4	41045003	41050003	4	41187480	41192480	.	.	.	.	0,0,0	38	12.1387	12.6477	16.1201	12.2474	10	11	12	10	0.000143123	0.00477465	0.0921578	0.000169372	NA,Aqp7	NA
4	48549987	48554987	4	48675000	48680000	.	.	.	.	0,0,0	46	14.3206	10.9875	10.0002	15.7187	11	10	10	12	0.00477156	0.000128458	0.000166057	0.0928797	NA,Msantd3,Msantd3,Msantd3	NA,Cavin4
4	57964993	57969993	4	58004993	58009993	.	.	.	.	0,0,0	42	15.1963	17.2823	14.998	16.7694	11	12	11	12	0.00477156	0.0770009	0.0057994	0.0928797	NA,Txn1	NA,Txndc8
4	58272515	58277515	4	58335018	58340018	.	.	.	.	0,0,0	48	14.3076	12.8995	14.3061	11.8609	11	11	11	10	0.00477156	0.00477465	0.0057994	0.000169372	NA,Musk,Musk,Musk,Musk,Musk,Musk	NA
4	59579993	59584993	4	59765018	59770018	.	.	.	.	0,0,0	36	11.4589	9.93027	10.5309	14.3797	10	10	10	11	0.000143123	0.000128458	0.000166057	0.00569329	NA,Hsdl2,Hsdl2	NA
4	89309987	89314987	4	89449993	89454993	.	.	.	.	0,0,0	34	4.43626	8.91987	18.0038	9.66999	6	9	12	9	7.53909e-13	1.92897e-06	0.0921578	2.78294e-06	NA,Cdkn2b	NA
4	102985000	102990000	4	103119987	103124987	.	.	.	.	0,0,0	64	10.1604	9.3779	16.1167	10.329	10	9	12	10	0.000143123	1.92897e-06	0.0921578	0.000169372	NA,Tctex1d1,Tctex1d1,Tctex1d1,Gm12709	NA,Wdr78,Mier1,Mier1,Mier1,Mier1,Mier1
4	107929987	107934987	4	108205018	108210018	.	.	.	.	0,0,0	34	13.0998	14.0097	18.1015	11.732	11	11	12	10	0.00477156	0.00477465	0.0921578	0.000169372	NA,Cpt2	NA,Zyg11a
4	108695001	108700001	4	108779996	108784996	.	.	.	.	0,0,0	50	17.1514	17.3654	14.325	18.0302	12	12	11	12	0.0708272	0.0770009	0.0057994	0.0928797	NA	NA,Zfyve9
4	115740000	115745000	4	115792478	115797478	.	.	.	.	0,0,0	52	16.0849	13.5358	18.8355	13.5639	12	11	12	11	0.0708272	0.00477465	0.0921578	0.00569329	NA,Efcab14	NA,Tex38,Atpaf1
4	116167490	116172490	4	116342496	116347496	.	.	.	.	0,0,0	34	13.9915	13.6094	17.4739	12.3834	11	11	12	11	0.00477156	0.00477465	0.0921578	0.00569329	NA,1700042G07Rik,Tspan1	NA
4	116337478	116342478	4	116567503	116572503	.	.	.	.	0,0,0	34	10.0464	9.96092	14.1495	11.7335	10	10	11	10	0.000143123	0.000128458	0.0057994	0.000169372	NA	NA,Tmem69,Gpbp1l1
4	116465012	116470012	4	116549999	116554999	.	.	.	.	0,0,0	34	12.5127	12.2356	10.6524	16.4589	11	10	10	12	0.00477156	0.000128458	0.000166057	0.0928797	NA,Mast2,Mast2	NA,Tmem69,Gpbp1l1
4	117532517	117537517	4	117674997	117679997	.	.	.	.	0,0,0	42	12.0105	10.3467	11.7678	11.9888	10	10	10	10	0.000143123	0.000128458	0.000166057	0.000169372	NA	NA,Dmap1
4	117545015	117550015	4	117609984	117614984	.	.	.	.	0,0,0	44	17.1893	19.2534	18.693	18.9313	12	12	12	12	0.0708272	0.0770009	0.0921578	0.0928797	NA,Eri3,Eri3,Eri3,Eri3,Eri3,Eri3	NA
4	118099990	118104990	4	118164993	118169993	.	.	.	.	0,0,0	54	14.1723	13.4472	19.1667	16.9885	11	11	12	12	0.00477156	0.00477465	0.0921578	0.0928797	NA	NA,Kdm4a,Kdm4a
4	118095012	118100012	4	118219987	118224987	.	.	.	.	0,0,0	34	9.06008	8.94157	10.974	7.87925	9	9	10	9	2.34136e-06	1.92897e-06	0.000166057	2.78294e-06	NA	NA,Mir7226
4	119544993	119549993	4	119614993	119619993	.	.	.	.	0,0,0	54	14.0857	14.3615	15.6097	15.5992	11	11	12	12	0.00477156	0.00477465	0.0921578	0.0928797	NA,Foxj3,Foxj3,Foxj3,Frg2f1	NA
4	120774999	120779999	4	120899981	120904981	.	.	.	.	0,0,0	50	13.9753	14.7088	12.466	16.5367	11	11	11	12	0.00477156	0.00477465	0.0057994	0.0928797	NA,Mir30e,Mir30c-1,Mir30f	NA
4	120974987	120979987	4	121064981	121069981	.	.	.	.	0,0,0	40	15.5708	12.8278	19.2035	8.84203	12	11	12	9	0.0708272	0.00477465	0.0921578	2.78294e-06	NA,Mir7015	NA
4	123812498	123817498	4	123897505	123902505	.	.	.	.	0,0,0	48	12.2798	10.6528	13.3711	14.4489	10	10	11	11	0.000143123	0.000128458	0.0057994	0.00569329	NA,Rhbdl2	NA,Mycbp
4	123825000	123830000	4	123860011	123865011	.	.	.	.	0,0,0	54	17.4748	16.6485	16.5129	16.6976	12	12	12	12	0.0708272	0.0770009	0.0921578	0.0928797	NA,Rhbdl2	NA
4	133235011	133240011	4	133304994	133309994	.	.	.	.	0,0,0	82	17.9332	18.4343	19.0272	18.5476	12	12	12	12	0.0708272	0.0770009	0.0921578	0.0928797	NA,Map3k6	NA
4	135440002	135445002	4	135475008	135480008	.	.	.	.	0,0,0	66	13.4884	15.6177	16.2571	16.2364	11	12	12	12	0.00477156	0.0770009	0.0921578	0.0928797	NA,Rcan3	NA
4	135974982	135979982	4	136054991	136059991	.	.	.	.	0,0,0	74	18.7188	15.4147	16.4973	19.2031	12	11	12	12	0.0708272	0.00477465	0.0921578	0.0928797	NA,Pithd1,Lypla2,Gale	NA,Rpl11
4	140135017	140140017	4	140244994	140249994	.	.	.	.	0,0,0	36	14.689	15.7245	15.5517	17.1425	11	12	11	12	0.00477156	0.0770009	0.0057994	0.0928797	NA,Gm13029	NA,Igsf21
4	141204984	141209984	4	141360005	141365005	.	.	.	.	0,0,0	46	10.7708	10.3203	9.54195	13.858	10	10	9	11	0.000143123	0.000128458	2.73076e-06	0.00569329	NA,Rsg1	NA,Fam131c
4	144779999	144784999	4	144825000	144830000	.	.	.	.	0,0,0	44	15.4748	14.4654	17.0402	16.1494	11	11	12	12	0.00477156	0.00477465	0.0921578	0.0928797	NA,Gm438	NA
4	149159979	149164979	4	149325002	149330002	.	.	.	.	0,0,0	36	13.7982	12.892	18.3262	14.1564	11	11	12	11	0.00477156	0.00477465	0.0921578	0.00569329	NA,Pgd,Pgd	NA,Ube4bos3
4	149345000	149350000	4	149537505	149542505	.	.	.	.	0,0,0	34	11.0829	10.2372	8.64241	13.4791	10	10	9	11	0.000143123	0.000128458	2.73076e-06	0.00569329	NA,Ube4bos3	NA,Ctnnbip1,Mir5616
4	153804999	153809999	4	153940011	153945011	.	.	.	.	0,0,0	34	10.9116	10.1807	12.3042	10.288	10	10	10	10	0.000143123	0.000128458	0.000166057	0.000169372	NA	NA,A430005L14Rik,A430005L14Rik,BC039966
4	4140005	4145005	4	4175005	4180005	.	.	.	.	0,0,0	42	13.4506	13.9272	13.5196	12.9899	11	11	11	11	0.0152617	0.0157429	0.0185848	0.0183317	NA,Penk,Penk	NA
4	5642502	5647502	4	5795005	5800005	.	.	.	.	0,0,0	32	8.27069	7.58555	4.44197	11.4042	9	8	6	10	1.87223e-05	2.45511e-07	1.86672e-11	0.000852571	NA,4930423M02Rik,Fam110b	NA
4	32585000	32590000	4	32684994	32689994	.	.	.	.	0,0,0	32	13.4149	10.0825	10.7051	7.55361	11	10	10	8	0.0152617	0.000680464	0.000834431	3.36413e-07	NA,Gja10	NA
4	58280005	58285005	4	58485000	58490000	.	.	.	.	0,0,0	32	6.57749	6.99787	9.48729	6.30631	8	8	9	8	2.87141e-07	2.45511e-07	2.17487e-05	3.36413e-07	NA,Musk,Musk,Musk,Musk,Musk,Musk	NA,Lpar1
4	88551255	88556255	4	88632499	88637499	.	.	.	.	0,0,0	42	14.611	13.1189	13.3304	14.9501	11	11	11	11	0.0152617	0.0157429	0.0185848	0.0183317	NA,Ifna15	NA,C87499,C87499,Ifna13
4	95049999	95054999	4	95684994	95689994	.	.	.	.	0,0,0	34	6.28043	9.84131	13.1129	10.0209	8	9	11	10	2.87141e-07	1.6278e-05	0.0185848	0.000852571	NA,Jun	NA
4	98979983	98984983	4	99189994	99194994	.	.	.	.	0,0,0	32	11.9609	10.1083	8.62072	12.6688	10	10	9	11	0.000722858	0.000680464	2.17487e-05	0.0183317	NA	NA,Atg4c,Atg4c
4	107380011	107385011	4	107445016	107450016	.	.	.	.	0,0,0	32	12.5119	11.9438	10.9705	11.7691	11	10	10	10	0.0152617	0.000680464	0.000834431	0.000852571	NA,Ndc1	NA,Glis1
4	117350000	117355000	4	117674983	117679983	.	.	.	.	0,0,0	32	6.92876	8.30946	7.27234	11.8711	8	9	8	10	2.87141e-07	1.6278e-05	3.46143e-07	0.000852571	NA	NA,Dmap1
4	126179989	126184989	4	126310000	126315000	.	.	.	.	0,0,0	32	10.8975	7.61352	8.49837	11.4918	10	8	9	10	0.000722858	2.45511e-07	2.17487e-05	0.000852571	NA	NA,Adprhl2,Tekt2,Tekt2,Tekt2
4	126484989	126489989	4	126530005	126535005	.	.	.	.	0,0,0	32	15.2863	14.9178	13.9216	13.4063	11	11	11	11	0.0152617	0.0157429	0.0185848	0.0183317	NA	NA,Ago4
4	132560000	132565000	4	132614983	132619983	.	.	.	.	0,0,0	76	11.6998	12.405	15.0379	14.579	10	11	11	11	0.000722858	0.0157429	0.0185848	0.0183317	NA,Ptafr	NA
4	148290000	148295000	4	148374994	148379994	.	.	.	.	0,0,0	36	11.0931	12.8311	15.4455	13.9733	10	11	11	11	0.000722858	0.0157429	0.0185848	0.0183317	NA,Disp3,Disp3,Disp3	NA
4	41467497	41472497	4	41652497	41657497	.	.	.	.	0,0,0	36	11.681	8.52973	12.9124	10.4793	10	9	11	10	0.00312435	0.000118048	0.0513002	0.00366917	NA,Kif24,Nudt2	NA,Enho
4	45017507	45022507	4	45087503	45092503	.	.	.	.	0,0,0	38	10.0813	8.38112	8.45699	8.57439	10	9	9	9	0.00312435	0.000118048	0.000145272	0.000148993	NA,Zbtb5,Polr1e,Polr1e,Zbtb5,Zbtb5	NA,Fbxo10
4	48540000	48545000	4	48630000	48635000	.	.	.	.	0,0,0	36	11.003	12.0191	12.2508	10.7756	10	10	10	10	0.00312435	0.00306124	0.00361511	0.00366917	NA,Msantd3,Msantd3,Msantd3	NA
4	54942511	54947511	4	55002502	55007502	.	.	.	.	0,0,0	58	13.8628	13.5157	11.5135	14.9554	11	11	10	11	0.0422094	0.044602	0.00361511	0.0509858	NA,Zfp462	NA
4	83344994	83349994	4	83399994	83404994	.	.	.	.	0,0,0	44	11.8882	13.0867	12.8448	14.0281	10	11	11	11	0.00312435	0.044602	0.0513002	0.0509858	NA	NA,Gm11413
4	101020000	101025000	4	101074984	101079984	.	.	.	.	0,0,0	36	13.0535	14.3184	14.138	15.0854	11	11	11	11	0.0422094	0.044602	0.0513002	0.0509858	NA	NA,Raver2
4	101067502	101072502	4	101147492	101152492	.	.	.	.	0,0,0	30	10.9955	10.3358	12.6252	13.4578	10	10	11	11	0.00312435	0.00306124	0.0513002	0.0509858	NA,Raver2	NA
4	101840005	101845005	4	101894984	101899984	.	.	.	.	0,0,0	36	8.55842	9.71273	13.9432	4.6626	9	9	11	6	0.000128464	0.000118048	0.0513002	4.75751e-10	NA,B020004J07Rik	NA,C130073F10Rik
4	102490016	102495016	4	102574993	102579993	.	.	.	.	0,0,0	58	12.6282	11.4786	13.0344	11.15	11	10	11	10	0.0422094	0.00306124	0.0513002	0.00366917	NA	NA,Pde4b,Pde4b,Pde4b
4	105155000	105160000	4	105420000	105425000	.	.	.	.	0,0,0	34	10.6822	10.6099	15.3704	8.15485	10	10	11	9	0.00312435	0.00306124	0.0513002	0.000148993	NA,Plpp3	NA
4	120290010	120295010	4	120384989	120389989	.	.	.	.	0,0,0	30	14.4401	12.356	13.7723	12.679	11	10	11	11	0.0422094	0.00306124	0.0513002	0.0509858	NA,Foxo6	NA
4	127114984	127119984	4	127210005	127215005	.	.	.	.	0,0,0	30	12.0398	12.2687	15.1767	13.2338	10	10	11	11	0.00312435	0.00306124	0.0513002	0.0509858	NA,Tmem35b	NA
4	147597502	147602502	4	147809997	147814997	.	.	.	.	0,0,0	32	1.95996	4.70573	5.32277	7.49665	2	6	7	8	1.66918e-19	5.74334e-10	5.82613e-08	3.67606e-06	NA	NA,Rps19-ps3,Zfp984
4	41332492	41337492	4	41440000	41445000	.	.	.	.	0,0,0	32	9.44478	9.61894	10.7199	11.8458	9	9	10	10	0.000738383	0.000717831	0.0132497	0.0133797	NA,Ubap1,Ubap1,Ubap1	NA
4	43615009	43620009	4	43850000	43855000	.	.	.	.	0,0,0	28	3.68613	6.07009	5.88989	6.92889	5	7	7	8	1.67096e-10	6.84754e-07	8.44304e-07	3.32275e-05	NA,Npr2,Npr2	NA,Olfr155
4	59095000	59100000	4	59570000	59575000	.	.	.	.	0,0,0	38	6.19053	5.63491	5.46263	8.50194	7	7	7	9	7.79987e-07	6.84754e-07	8.44304e-07	0.000854993	NA	NA,Hsdl2,Hsdl2
4	65115008	65120008	4	65584998	65589998	.	.	.	.	0,0,0	40	7.69566	7.9741	9.60436	10.0163	8	9	9	10	2.87841e-05	0.000717831	0.000836743	0.0133797	NA,Pappa	NA
4	83290009	83295009	4	83390014	83395014	.	.	.	.	0,0,0	34	7.57457	11.2256	11.8174	11.0291	8	10	10	10	2.87841e-05	0.011802	0.0132497	0.0133797	NA	NA,Gm11413
4	116159990	116164990	4	116455000	116460000	.	.	.	.	0,0,0	28	9.26558	9.48887	8.98708	9.53966	9	9	9	9	0.000738383	0.000717831	0.000836743	0.000854993	NA,Pomgnt1,Pomgnt1,Pomgnt1,1700042G07Rik,Tspan1	NA,Mast2,Mast2
4	119424996	119429996	4	119660008	119665008	.	.	.	.	0,0,0	34	10.461	9.27154	10.2677	10.9624	10	9	10	10	0.0115665	0.000717831	0.0132497	0.0133797	NA,Ccdc30,Ppcs,Ppcs,Ccdc30,Zmynd12	NA,Guca2b
4	119807512	119812512	4	120099985	120104985	.	.	.	.	0,0,0	28	7.59179	9.02117	8.2806	10.9008	8	9	9	10	2.87841e-05	0.000717831	0.000836743	0.0133797	NA,Hivep3	NA
4	123585002	123590002	4	123664999	123669999	.	.	.	.	0,0,0	42	7.44346	7.3137	6.93862	9.07757	8	8	8	9	2.87841e-05	2.69435e-05	3.37114e-05	0.000854993	NA	NA,Gm12925
4	134032502	134037502	4	134297492	134302492	.	.	.	.	0,0,0	28	5.47856	6.14373	6.99934	5.80878	7	7	8	7	7.79987e-07	6.84754e-07	3.37114e-05	8.05511e-07	NA	NA,Pdik1l,Pdik1l
4	134139985	134144985	4	134295000	134300000	.	.	.	.	0,0,0	28	8.42361	7.97496	8.0705	10.486	9	9	9	10	0.000738383	0.000717831	0.000836743	0.0133797	NA,Sh3bgrl3	NA,Pdik1l,Pdik1l
4	135355000	135360000	4	135494985	135499985	.	.	.	.	0,0,0	32	12.042	7.89462	7.12715	9.81212	10	9	8	9	0.0115665	0.000717831	3.37114e-05	0.000854993	NA,Srrm1,Srrm1	NA,Stpg1,Nipal3,Nipal3,Nipal3
4	141632483	141637483	4	141842502	141847502	.	.	.	.	0,0,0	32	9.58838	9.88927	12.2436	10.8007	9	10	10	10	0.000738383	0.011802	0.0132497	0.0133797	NA,Slc25a34	NA,Ctrcos,Ctrc
4	149145004	149150004	4	149260004	149265004	.	.	.	.	0,0,0	34	11.8918	10.8561	10.5971	11.3134	10	10	10	10	0.0115665	0.011802	0.0132497	0.0133797	NA,Cenps	NA
4	153285014	153290014	4	153477488	153482488	.	.	.	.	0,0,0	28	9.71812	10.0821	9.15427	10.622	9	10	9	10	0.000738383	0.011802	0.000836743	0.0133797	NA	NA,Ajap1
4	10895009	10900009	4	11005004	11010004	.	.	.	.	0,0,0	54	11.3015	9.89581	11.1747	11.2078	10	10	10	10	0.0359981	0.0378072	0.0409486	0.0412185	NA	NA,Plekhf2
4	16010000	16015000	4	16159997	16164997	.	.	.	.	0,0,0	36	9.44471	10.0726	10.1309	10.9683	9	10	10	10	0.00351298	0.0378072	0.0409486	0.0412185	NA,Osgin2,Osgin2,Osgin2	NA,Ripk2,Ripk2,A530072M11Rik,Ripk2
4	25268329	25273329	4	25308334	25313334	.	.	.	.	0,0,0	30	4.89688	6.20897	6.08595	3.94649	6	7	7	6	2.63015e-07	8.6764e-06	1.00269e-05	2.28917e-07	NA,Ufl1,Ufl1	NA
4	34815017	34820017	4	34879995	34884995	.	.	.	.	0,0,0	64	7.38176	8.24063	9.0272	10.3355	8	9	9	10	0.000217023	0.00361298	0.0039917	0.0412185	NA	NA,Zfp292,Cga
4	43530011	43535011	4	43659993	43664993	.	.	.	.	0,0,0	34	8.21119	7.39472	7.43733	9.791	9	8	8	9	0.00351298	0.000214713	0.000244761	0.00400034	NA,Tpm2,Tpm2,Tpm2	NA,Fam221b,Spag8,Hint2,Tmem8b,Spag8,Tmem8b
4	43629995	43634995	4	43864986	43869986	.	.	.	.	0,0,0	26	5.93442	6.5423	6.71182	9.28699	7	8	8	9	9.37851e-06	0.000214713	0.000244761	0.00400034	NA,Npr2,Npr2	NA,Reck,Olfr155
4	63639986	63644986	4	63720004	63725004	.	.	.	.	0,0,0	38	6.86008	7.3138	8.2305	7.00267	8	8	9	8	0.000217023	0.000214713	0.0039917	0.000247555	NA,Gm11482	NA
4	68854986	68859986	4	68945004	68950004	.	.	.	.	0,0,0	28	10.5552	9.96749	9.35724	11.4741	10	10	9	10	0.0359981	0.0378072	0.0039917	0.0412185	NA	NA,Brinp1
4	99940004	99945004	4	100094995	100099995	.	.	.	.	0,0,0	32	10.4603	9.12845	8.78512	10.147	10	9	9	10	0.0359981	0.00361298	0.0039917	0.0412185	NA,Pgm2	NA,Ror1,Ror1
4	104639995	104644995	4	104875004	104880004	.	.	.	.	0,0,0	26	9.27076	9.90292	8.65734	11.2349	9	10	9	10	0.00351298	0.0378072	0.0039917	0.0412185	NA	NA,C8a,C8a,C8a
4	104667494	104672494	4	104887501	104892501	.	.	.	.	0,0,0	28	7.087	6.79682	6.06338	8.32467	8	8	7	9	0.000217023	0.000214713	1.00269e-05	0.00400034	NA	NA,C8a,C8a,C8a
4	104764997	104769997	4	104819988	104824988	.	.	.	.	0,0,0	30	10.6652	10.965	11.0015	11.1677	10	10	10	10	0.0359981	0.0378072	0.0409486	0.0412185	NA,C8b,C8b	NA
4	107175004	107180004	4	107345001	107350001	.	.	.	.	0,0,0	40	10.048	8.53183	8.84193	11.4808	10	9	9	10	0.0359981	0.00361298	0.0039917	0.0412185	NA,Tmem59,Tceanc2	NA
4	107184995	107189995	4	107364983	107369983	.	.	.	.	0,0,0	40	10.6656	7.50246	9.06243	6.02311	10	8	9	7	0.0359981	0.000214713	0.0039917	9.44824e-06	NA,Tmem59,Tceanc2	NA,Ndc1
4	110129994	110134994	4	110275006	110280006	.	.	.	.	0,0,0	36	8.80536	9.24506	11.9353	12.1084	9	9	10	10	0.00351298	0.00361298	0.0409486	0.0412185	NA	NA,Elavl4,Elavl4,Elavl4,Elavl4,Elavl4
4	116180000	116185000	4	116304991	116309991	.	.	.	.	0,0,0	30	8.50656	11.1239	11.3821	9.58085	9	10	10	9	0.00351298	0.0378072	0.0409486	0.00400034	NA,1700042G07Rik,Tspan1	NA
4	120399986	120404986	4	120435008	120440008	.	.	.	.	0,0,0	50	10.6674	10.6874	10.8188	11.2097	10	10	10	10	0.0359981	0.0378072	0.0409486	0.0412185	NA,Scmh1,Scmh1	NA
4	120765008	120770008	4	120870013	120875013	.	.	.	.	0,0,0	28	9.57145	9.71385	11.082	10.0205	9	9	10	10	0.00351298	0.00361298	0.0409486	0.0412185	NA,Mir30e,Mir30c-1,Mir30f	NA
4	123704991	123709991	4	123900013	123905013	.	.	.	.	0,0,0	26	6.17564	6.31115	5.69107	11.7447	7	8	7	10	9.37851e-06	0.000214713	1.00269e-05	0.0412185	NA,BC002163,Ndufs5	NA,Rragc,Mycbp
4	124559986	124564986	4	124610004	124615004	.	.	.	.	0,0,0	36	10.0091	10.3269	9.7167	10.8343	10	10	9	10	0.0359981	0.0378072	0.0039917	0.0412185	NA,4933407E24Rik	NA
4	125704986	125709986	4	125910000	125915000	.	.	.	.	0,0,0	26	8.31328	8.51101	9.24515	9.43944	9	9	9	9	0.00351298	0.00361298	0.0039917	0.00400034	NA	NA,2610028E06Rik
4	128714995	128719995	4	128964991	128969991	.	.	.	.	0,0,0	26	9.54068	7.61454	8.61677	4.76013	9	8	9	6	0.00351298	0.000214713	0.0039917	2.28917e-07	NA,Phc2	NA,Azin2,Azin2
4	129135013	129140013	4	129300004	129305004	.	.	.	.	0,0,0	30	11.6484	10.9214	12.106	10.0147	10	10	10	10	0.0359981	0.0378072	0.0409486	0.0412185	NA,Fndc5	NA,Sync
4	132944991	132949991	4	133210004	133215004	.	.	.	.	0,0,0	30	8.48029	7.76562	11.7426	6.38431	9	8	10	8	0.00351298	0.000214713	0.0409486	0.000247555	NA	NA,Gpr3,Cd164l2
4	135507493	135512493	4	135759991	135764991	.	.	.	.	0,0,0	26	10.1244	9.31307	11.4675	9.16509	10	9	10	9	0.0359981	0.00361298	0.0409486	0.00400034	NA,Stpg1	NA,Myom3
4	136200004	136205004	4	136355004	136360004	.	.	.	.	0,0,0	34	11.2734	8.98498	11.5353	11.3707	10	9	10	10	0.0359981	0.00361298	0.0409486	0.0412185	NA,Asap3,Asap3	NA
4	138164995	138169995	4	138275000	138280000	.	.	.	.	0,0,0	32	12.1646	10.5843	10.8195	10.9181	10	10	10	10	0.0359981	0.0378072	0.0409486	0.0412185	NA,Mir6399	NA
4	144774986	144779986	4	144874999	144879999	.	.	.	.	0,0,0	32	7.74876	7.00045	6.34884	10.2891	8	8	8	10	0.000217023	0.000214713	0.000244761	0.0412185	NA,Gm438	NA
4	149140002	149145002	4	149339989	149344989	.	.	.	.	0,0,0	36	10.1013	7.40001	9.35276	6.51489	10	8	9	8	0.0359981	0.000214713	0.0039917	0.000247555	NA,Cenps	NA,Ube4bos3
4	149404986	149409986	4	149539999	149544999	.	.	.	.	0,0,0	26	7.48042	7.12406	7.76257	10.3383	8	8	8	10	0.000217023	0.000214713	0.000244761	0.0412185	NA	NA,Ctnnbip1,Mir5616
4	150705006	150710006	4	150904997	150909997	.	.	.	.	0,0,0	30	11.7735	11.4313	11.0382	11.9662	10	10	10	10	0.0359981	0.0378072	0.0409486	0.0412185	NA	NA,Tnfrsf9,Park7,Tnfrsf9
4	152349985	152354985	4	152480007	152485007	.	.	.	.	0,0,0	30	8.01445	8.62868	10.0532	9.72851	9	9	10	9	0.00351298	0.00361298	0.0409486	0.00400034	NA,Chd5,Chd5	NA,Kcnab2,Nphp4,Kcnab2,Nphp4,Nphp4,Kcnab2
4	155482502	155487502	4	155694995	155699995	.	.	.	.	0,0,0	28	6.66589	7.64896	10.1778	8.26301	8	8	10	9	0.000217023	0.000214713	0.0409486	0.00400034	NA,Gnb1,Gnb1,Gnb1	NA,Ssu72,Fndc10
4	45870000	45875000	4	46025006	46030006	.	.	.	.	0,0,0	32	10.4722	8.36088	8.01561	8.55226	10	9	9	9	0.0953865	0.0147084	0.0154667	0.0154249	NA	NA,Tmod1
4	45969999	45974999	4	46134987	46139987	.	.	.	.	0,0,0	30	8.7768	8.86167	7.88242	7.82605	9	9	9	8	0.0137964	0.0147084	0.0154667	0.00147889	NA,Tdrd7,Tdrd7,Tdrd7	NA,Tstd2,Tstd2,Tstd2,Ncbp1
4	47120002	47125002	4	47350000	47355000	.	.	.	.	0,0,0	32	6.24981	6.6844	9.03778	6.77807	8	8	9	8	0.00131139	0.00138095	0.0154667	0.00147889	NA	NA,Tgfbr1,Tgfbr1
4	52055000	52060000	4	52094995	52099995	.	.	.	.	0,0,0	40	3.46227	4.83303	9.60448	1.31098	5	6	9	1	1.38402e-07	4.627e-06	0.0154667	3.67692e-15	NA,C630028M04Rik	NA
4	58269995	58274995	4	58627493	58632493	.	.	.	.	0,0,0	26	5.22746	6.43063	9.62057	5.24003	7	8	9	7	8.85484e-05	0.00138095	0.0154667	9.10705e-05	NA,Musk,Musk,Musk,Musk,Musk,Musk	NA
4	88685000	88690000	4	88815000	88820000	.	.	.	.	0,0,0	26	1.50113	1.65881	4.02897	1.36044	1	2	6	1	4.30284e-15	3.8913e-13	3.72923e-06	3.67692e-15	NA,Ifna16,Ifna2,Ifnab	NA,Ifna7,Gm13288,Ifna6,Gm13289,Ifna11,Gm13287,Gm13285,Gm13285,Gm13290
4	106740004	106745004	4	107069987	107074987	.	.	.	.	0,0,0	26	8.5005	9.12999	6.88733	9.66029	9	9	8	9	0.0137964	0.0147084	0.00147685	0.0154249	NA,Mroh7,Fam151a	NA,Cyb5rl,Mrpl37,Cyb5rl
4	119235004	119240004	4	119415004	119420004	.	.	.	.	0,0,0	28	8.94903	7.12121	9.60514	8.54553	9	8	9	9	0.0137964	0.00138095	0.0154667	0.0154249	NA,P3h1,P3h1,P3h1,P3h1,P3h1,AU022252	NA,Ccdc30,Ppcs,Ppcs,Ccdc30,Zmynd12
4	129700000	129705000	4	129820000	129825000	.	.	.	.	0,0,0	24	7.08915	7.79318	8.1254	8.86142	8	8	9	9	0.00131139	0.00138095	0.0154667	0.0154249	NA,Tmem39b,Tmem39b	NA,Ptp4a2,Ptp4a2
4	141855000	141860000	4	142100000	142105000	.	.	.	.	0,0,0	28	7.78801	7.54578	6.83735	8.65448	8	8	8	9	0.00131139	0.00138095	0.00147685	0.0154249	NA,Ctrcos,Ctrc	NA
4	143145008	143150008	4	143219987	143224987	.	.	.	.	0,0,0	66	8.1545	8.87209	8.35005	9.48752	9	9	9	9	0.0137964	0.0147084	0.0154667	0.0154249	NA,Mir7021	NA,Prdm2,Prdm2
4	11999987	12004987	4	12165000	12170000	.	.	.	.	0,0,0	22	6.73166	5.64122	7.76989	7.50815	8	7	8	8	0.00629987	0.000719886	0.00703196	0.00710092	NA	NA,Fam92a,Fam92a
4	53030000	53035000	4	53145008	53150008	.	.	.	.	0,0,0	22	8.66543	7.61821	9.28242	6.91447	9	8	9	8	0.0450188	0.00702475	0.0493812	0.00710092	NA	NA,Abca1
4	56945012	56950012	4	57035008	57040008	.	.	.	.	0,0,0	30	9.15015	8.41618	7.23746	6.97722	9	9	8	8	0.0450188	0.0482933	0.00703196	0.00710092	NA,Tmem245	NA
4	61825008	61830008	4	61894995	61899995	.	.	.	.	0,0,0	34	8.23382	7.90769	8.31507	9.70438	9	9	9	9	0.0450188	0.0482933	0.0493812	0.049304	NA,Mup5	NA
4	62775004	62780004	4	62959995	62964995	.	.	.	.	0,0,0	22	8.09151	6.36522	5.4283	7.11896	9	8	7	8	0.0450188	0.00702475	0.000695252	0.00710092	NA	NA,Zfp618
4	70485000	70490000	4	70539991	70544991	.	.	.	.	0,0,0	54	7.70263	8.06237	8.06188	8.36849	8	9	9	9	0.00629987	0.0482933	0.0493812	0.049304	NA	NA,Megf9
4	72205000	72210000	4	72379995	72384995	.	.	.	.	0,0,0	22	7.84922	7.45157	3.93018	6.5185	9	8	5	8	0.0450188	0.00702475	2.19098e-06	0.00710092	NA,Tle1,Tle1,C630043F03Rik,Tle1,Tle1,Tle1	NA
4	88964991	88969991	4	89115000	89120000	.	.	.	.	0,0,0	30	6.23364	6.16831	5.51759	8.12957	8	7	7	9	0.00629987	0.000719886	0.000695252	0.049304	NA	NA,Gm12602
4	97775012	97780012	4	97999991	98004991	.	.	.	.	0,0,0	26	4.01402	4.09582	4.31575	3.95043	6	6	6	6	4.84291e-05	5.91206e-05	4.80606e-05	4.51999e-05	NA,Nfia,Nfia	NA
4	100775000	100780000	4	101144995	101149995	.	.	.	.	0,0,0	24	7.77692	7.27579	7.00589	8.64117	8	8	8	9	0.00629987	0.00702475	0.00703196	0.049304	NA,Cachd1	NA
4	101555008	101560008	4	101640000	101645000	.	.	.	.	0,0,0	32	8.51594	8.85757	8.80539	8.44146	9	9	9	9	0.0450188	0.0482933	0.0493812	0.049304	NA,Dnajc6	NA,Leprot
4	104725002	104730002	4	104879996	104884996	.	.	.	.	0,0,0	28	9.71569	9.09451	8.9155	8.386	9	9	9	9	0.0450188	0.0482933	0.0493812	0.049304	NA	NA,C8a,C8a,C8a
4	107915003	107920003	4	108220000	108225000	.	.	.	.	0,0,0	26	9.19841	8.20396	7.66584	7.61103	9	9	8	8	0.0450188	0.0482933	0.00703196	0.00710092	NA,Cpt2	NA,Zyg11a
4	107945000	107950000	4	108250000	108255000	.	.	.	.	0,0,0	30	7.80043	8.12978	7.77462	8.4368	8	9	8	9	0.00629987	0.0482933	0.00703196	0.049304	NA,4930407G08Rik	NA
4	116169996	116174996	4	116589988	116594988	.	.	.	.	0,0,0	26	5.31142	6.25047	8.75799	5.60066	7	8	9	7	0.000665805	0.00702475	0.0493812	0.000691176	NA,1700042G07Rik,Tspan1	NA,C530005A16Rik,Ccdc17
4	117454996	117459996	4	117755007	117760007	.	.	.	.	0,0,0	22	4.47506	4.85326	5.04567	4.95875	6	6	7	6	4.84291e-05	5.91206e-05	0.000695252	4.51999e-05	NA	NA,Klf17
4	118135003	118140003	4	118220000	118225000	.	.	.	.	0,0,0	34	8.6	9.34153	9.63349	9.38552	9	9	9	9	0.0450188	0.0482933	0.0493812	0.049304	NA,St3gal3,St3gal3,St3gal3,St3gal3	NA,Mir7226
4	123955003	123960003	4	124474992	124479992	.	.	.	.	0,0,0	22	6.86798	6.75381	7.24649	6.35383	8	8	8	8	0.00629987	0.00702475	0.00703196	0.00710092	NA	NA,1700057H15Rik
4	126085007	126090007	4	126309988	126314988	.	.	.	.	0,0,0	22	6.0789	5.10135	5.15838	6.6908	7	7	7	8	0.000665805	0.000719886	0.000695252	0.00710092	NA,Lsm10,Lsm10	NA,Adprhl2,Tekt2,Tekt2,Tekt2
4	133975003	133980003	4	134064996	134069996	.	.	.	.	0,0,0	42	6.34971	7.11357	7.93729	9.18938	8	8	9	9	0.00629987	0.00702475	0.0493812	0.049304	NA,Hmgn2	NA,Crybg2
4	143725000	143730000	4	143895000	143900000	.	.	.	.	0,0,0	26	5.32171	5.77541	5.94523	7.72594	7	7	7	8	0.000665805	0.000719886	0.000695252	0.00710092	NA,Gm13078	NA,Pramef6
4	152320010	152325010	4	152480006	152485006	.	.	.	.	0,0,0	30	8.61873	6.27324	5.81057	6.54924	9	8	7	8	0.0450188	0.00702475	0.000695252	0.00710092	NA,Rnf207,Rpl22,Rpl22,Rpl22,Rpl22,Rpl22	NA,Kcnab2,Nphp4,Kcnab2,Nphp4,Nphp4,Kcnab2
4	152795000	152800000	4	153470007	153475007	.	.	.	.	0,0,0	30	5.47535	7.22439	9.17819	7.7067	7	8	9	8	0.000665805	0.00702475	0.0493812	0.00710092	NA	NA,Ajap1
4	155425000	155430000	4	155519996	155524996	.	.	.	.	0,0,0	22	6.79022	7.44555	6.23737	8.97836	8	8	8	9	0.00629987	0.00702475	0.00703196	0.049304	NA,5830444B04Rik,5830444B04Rik,5830444B04Rik	NA
4	155830001	155835001	4	155944996	155949996	.	.	.	.	0,0,0	40	6.37695	6.29095	5.86503	9.21317	8	8	7	9	0.00629987	0.00702475	0.000695252	0.049304	NA,Dvl1,Aurkaip1,Mxra8,Dvl1	NA,C1qtnf12,Ube2j2,Ube2j2,Ube2j2,Ube2j2,Ube2j2,Ube2j2,Gm5801
5	35892629	35897629	5	35927629	35932629	.	.	.	.	0,0,0	86	31.1568	33.9303	35.2393	34.4133	15	15	15	15	2.78605e-08	3.61399e-08	3.69714e-08	3.77145e-08	NA,Afap1	NA
5	139404897	139409897	5	139452423	139457423	.	.	.	.	0,0,0	82	34.0271	38.1892	37.7086	36.7215	15	15	15	15	4.4017e-07	5.51252e-07	5.73186e-07	5.90371e-07	NA,C130050O18Rik	NA,3110082I17Rik
5	92456689	92461689	5	92501671	92506671	.	.	.	.	0,0,0	114	34.5225	34.3381	36.3494	35.3416	15	15	15	15	0.000192337	0.000235937	0.000251392	0.000259571	NA,Mir6415	NA,Scarb2
5	139277505	139282505	5	139323746	139328746	.	.	.	.	0,0,0	96	38.334	37.7492	41.3303	37.3182	15	15	16	15	0.000192337	0.000235937	0.0632037	0.000259571	NA	NA,Adap1
5	143571249	143576249	5	143622490	143627490	.	.	.	.	0,0,0	84	32.2078	31.3314	30.3937	32.1953	15	15	14	15	0.000192337	0.000235937	1.40189e-07	0.000259571	NA	NA,Cyth3
5	121870000	121875000	5	122059967	122064967	.	.	.	.	0,0,0	70	22.5527	22.9091	34.5866	23.3381	13	13	15	13	7.69001e-11	7.40924e-11	0.000716992	1.05261e-10	NA	NA,Cux2,Cux2
5	134187499	134192499	5	134227467	134232467	.	.	.	.	0,0,0	78	38.9201	32.2426	38.2717	34.7622	16	15	15	15	0.0881404	0.0006569	0.000716992	0.000740405	NA,Rcc1l,Gtf2ird2,Gtf2ird2	NA,Ncf1,Ncf1,Ncf1
5	73250007	73255007	5	73301635	73306635	.	.	.	.	0,0,0	110	30.4075	29.2523	26.961	27.587	14	14	14	14	7.55894e-06	9.37923e-06	1.04601e-05	1.06657e-05	NA,Fryl	NA,Ociad1,Ociad1,Ociad1,Ociad1
5	114317459	114322459	5	114352486	114357486	.	.	.	.	0,0,0	66	34.3154	33.5143	37.7199	31.3444	15	15	15	15	0.0036945	0.00432547	0.00489899	0.00505609	NA,Myo1h	NA
5	148750012	148755012	5	148787512	148792512	.	.	.	.	0,0,0	86	23.6407	18.4347	21.5057	22.7148	13	12	13	13	3.24053e-09	3.41759e-13	4.52821e-09	4.41534e-09	NA,2210417A02Rik	NA,4930505K14Rik
5	20913316	20918316	5	20953366	20958366	.	.	.	.	0,0,0	64	31.698	34.9279	30.4436	37.1679	15	15	14	15	0.00863004	0.00990835	3.90146e-05	0.0119447	NA	NA,A630072M18Rik,Rsbn1l
5	34914975	34919975	5	34977500	34982500	.	.	.	.	0,0,0	64	21.604	24.0135	35.0761	23.7199	13	13	15	13	1.90236e-08	1.89333e-08	0.0115155	2.63034e-08	NA,Msantd1,Msantd1	NA
5	53205007	53210007	5	53269974	53274974	.	.	.	.	0,0,0	92	28.0368	27.7364	29.433	38.3407	14	14	14	15	2.8116e-05	3.47663e-05	3.90146e-05	0.0119447	NA,Sel1l3	NA,Smim20
5	122270023	122275023	5	122305023	122310023	.	.	.	.	0,0,0	64	33.8075	34.7078	38.2556	38.6082	15	15	15	15	0.00863004	0.00990835	0.0115155	0.0119447	NA,Tctn1,Pptc7,Tctn1	NA
5	110204932	110209932	5	110254999	110259999	.	.	.	.	0,0,0	62	30.2605	33.6573	27.5738	38.1675	14	15	14	15	9.71061e-05	0.0213931	0.000135863	0.0264397	NA	NA,Pgam5,Pgam5
5	136832467	136837467	5	136902532	136907532	.	.	.	.	0,0,0	62	24.814	25.3525	34.6389	28.4888	14	14	15	14	9.71061e-05	0.000119655	0.0256062	0.000138322	NA	NA,4933404O12Rik,Ift22
5	140705000	140710000	5	140749989	140754989	.	.	.	.	0,0,0	68	26.7892	24.6982	28.7734	23.2434	14	14	14	13	9.71061e-05	0.000119655	0.000135863	1.44651e-07	NA,Brat1,Brat1,Iqce,Iqce,Brat1	NA
5	148400006	148405006	5	148445000	148450000	.	.	.	.	0,0,0	66	31.907	30.8703	32.6953	35.5646	15	14	15	15	0.0192299	0.000119655	0.0256062	0.0264397	NA,Slc7a1,Slc7a1	NA
5	31004979	31009979	5	31045020	31050020	.	.	.	.	0,0,0	76	32.9207	28.1592	27.5663	33.0488	15	14	14	15	0.0402183	0.000387068	0.000446413	0.055271	NA	NA,Cad,Slc5a6,Slc5a6,Cad,Slc5a6,Atraid,Slc5a6,Cad,Atraid
5	105699979	105704979	5	105734979	105739979	.	.	.	.	0,0,0	70	24.0902	22.9584	28.8	24.0939	13	13	14	13	5.37625e-07	5.50919e-07	0.000446413	7.49769e-07	NA,Lrrc8d,Lrrc8d	NA
5	113605020	113610020	5	113645060	113650060	.	.	.	.	0,0,0	60	33.1573	34.4071	38.2334	33.3346	15	15	15	15	0.0402183	0.0441069	0.0533244	0.055271	NA	NA,Cmklr1,Cmklr1
5	115000060	115005060	5	115065010	115070010	.	.	.	.	0,0,0	70	22.0804	27.5082	28.0613	32.2681	13	14	14	15	5.37625e-07	0.000387068	0.000446413	0.055271	NA,Sppl3	NA
5	124975039	124980039	5	125010039	125015039	.	.	.	.	0,0,0	60	31.5505	34.8873	31.5241	37.0475	15	15	15	15	0.0402183	0.0441069	0.0533244	0.055271	NA	NA,Rflna
5	135014995	135019995	5	135109980	135114980	.	.	.	.	0,0,0	66	19.4406	17.7131	31.6655	15.9934	12	12	15	12	2.66402e-10	2.30254e-10	0.0533244	3.36723e-10	NA,Abhd11,Abhd11os,Abhd11,Stx1a,Abhd11,Stx1a,Stx1a,Stx1a	NA,Mlxipl,Mlxipl,Mlxipl,Mlxipl
5	67607503	67612503	5	67722514	67727514	.	.	.	.	0,0,0	58	13.9037	12.8981	11.1338	18.8585	11	11	10	12	5.94778e-13	4.17573e-13	8.5644e-17	2.50048e-09	NA,Shisa3	NA
5	74155000	74160000	5	74202509	74207509	.	.	.	.	0,0,0	58	32.696	31.8266	29.96	27.2987	15	15	14	14	0.0791935	0.084224	0.00137067	0.00137378	NA	NA,Rasl11b
5	129995000	130000000	5	130037490	130042490	.	.	.	.	0,0,0	58	28.1001	28.1887	25.9916	30.4509	14	14	14	14	0.000956817	0.00118414	0.00137067	0.00137378	NA,Gusb,Gusb,Gusb,Gusb	NA,Crcp
5	134497491	134502491	5	134615000	134620000	.	.	.	.	0,0,0	76	16.738	16.6565	27.0798	12.7846	12	12	14	11	2.00439e-09	1.74819e-09	0.00137067	6.99365e-13	NA	NA,Lat2,Lat2
5	143630008	143635008	5	143670026	143675026	.	.	.	.	0,0,0	78	24.7894	27.559	30.6925	24.6252	14	14	14	14	0.000956817	0.00118414	0.00137067	0.00137378	NA,Cyth3	NA
5	30115017	30120017	5	30155017	30160017	.	.	.	.	0,0,0	56	24.5761	24.5248	27.6153	22.2462	13	13	14	13	1.15321e-05	1.21293e-05	0.00385165	1.61125e-05	NA,Garem2,3110082J24Rik	NA,Hadhb,Hadhb,Mir1960,Hadha,Hadhb
5	74090016	74095016	5	74197508	74202508	.	.	.	.	0,0,0	56	15.83	17.1384	18.0602	19.5888	12	12	12	13	1.40341e-08	1.23176e-08	1.82403e-08	1.61125e-05	NA,Snora26,Dancr,Dancr,Dancr	NA,Rasl11b
5	76910016	76915016	5	76950008	76955008	.	.	.	.	0,0,0	80	27.4858	23.2093	21.444	26.8053	14	13	13	14	0.00268484	1.21293e-05	1.63764e-05	0.00385202	NA,Aasdh	NA,Paics,Ppat,Paics,Paics,Paics,Paics
5	103689977	103694977	5	103738360	103743360	.	.	.	.	0,0,0	66	23.6955	25.942	26.849	23.1702	13	14	14	13	1.15321e-05	0.0032834	0.00385165	1.61125e-05	NA	NA,Aff1,Aff1
5	142555044	142560044	5	142619991	142624991	.	.	.	.	0,0,0	80	17.6097	17.3583	17.5922	27.4465	12	12	12	14	1.40341e-08	1.23176e-08	1.82403e-08	0.00385202	NA,Radil,Radil,Radil	NA,Mmd2,Wipi2
5	115977477	115982477	5	116022447	116027447	.	.	.	.	0,0,0	58	19.8885	18.3787	18.5673	14.4558	13	12	12	11	4.76276e-05	8.14775e-08	1.20339e-07	7.76987e-11	NA	NA,Prkab1
5	125402524	125407524	5	125477536	125482536	.	.	.	.	0,0,0	66	20.4138	22.8457	30.6904	28.1134	13	13	14	14	4.76276e-05	5.0634e-05	0.0101081	0.0100593	NA	NA,Aacs
5	44074971	44079971	5	44110014	44115014	.	.	.	.	0,0,0	52	23.8733	22.9831	25.6099	23.4866	13	13	14	13	0.000179309	0.00019367	0.0242977	0.000255018	NA	NA,Prom1,Prom1
5	76144985	76149985	5	76180000	76185000	.	.	.	.	0,0,0	60	27.7451	24.3467	29.1921	25.2012	14	13	14	14	0.0171209	0.00019367	0.0242977	0.024324	NA,Srd5a3	NA,Tmem165
5	92502507	92507507	5	92600000	92605000	.	.	.	.	0,0,0	52	19.6017	19.6353	18.5378	20.0536	13	13	12	13	0.000179309	0.00019367	7.20484e-07	0.000255018	NA,Scarb2	NA,Stbd1
5	103680009	103685009	5	103759962	103764962	.	.	.	.	0,0,0	66	19.4585	19.1215	27.5219	15.4481	12	12	14	11	5.51969e-07	5.03044e-07	0.0242977	7.20702e-10	NA	NA,Aff1,Aff1
5	117860028	117865028	5	117915014	117920014	.	.	.	.	0,0,0	52	20.4737	22.6797	24.9636	25.6315	13	13	14	14	0.000179309	0.00019367	0.0242977	0.024324	NA,Nos1	NA
5	122649972	122654972	5	122695000	122700000	.	.	.	.	0,0,0	58	27.2262	30.7713	29.8227	29.695	14	14	14	14	0.0171209	0.0202867	0.0242977	0.024324	NA,P2rx7,P2rx7,P2rx7,P2rx7,P2rx7	NA,P2rx4,P2rx4,Mir8115,P2rx4
5	135319972	135324972	5	135359958	135364958	.	.	.	.	0,0,0	52	26.9653	26.2951	29.9698	29.5705	14	14	14	14	0.0171209	0.0202867	0.0242977	0.024324	NA	NA,Trim50,Fkbp6,Fkbp6,Fkbp6,Trim50,Fkbp6,Nsun5,Nsun5,Nsun5
5	135400013	135405013	5	135450013	135455013	.	.	.	.	0,0,0	64	24.7913	23.3688	28.6103	24.7921	14	13	14	14	0.0171209	0.00019367	0.0242977	0.024324	NA,Pom121	NA
5	135397504	135402504	5	135610013	135615013	.	.	.	.	0,0,0	52	18.297	13.2212	14.6143	17.2554	12	11	11	12	5.51969e-07	4.78739e-10	7.27088e-10	7.06697e-07	NA,Pom121	NA
5	31644986	31649986	5	31689973	31694973	.	.	.	.	0,0,0	66	25.4067	25.7132	29.5835	25.1433	14	14	14	14	0.0381449	0.0444927	0.0539207	0.0540063	NA	NA,Babam2,Rbks,Babam2,Babam2,Babam2,Babam2
5	38049973	38054973	5	38085000	38090000	.	.	.	.	0,0,0	50	28.2476	26.1418	27.9821	27.262	14	14	14	14	0.0381449	0.0444927	0.0539207	0.0540063	NA,Stx18,Stx18,Stx18,Stx18	NA
5	64889984	64894984	5	64931666	64936666	.	.	.	.	0,0,0	56	16.1851	17.0133	24.2203	16.5556	12	12	13	12	3.0288e-06	2.8171e-06	0.000899735	3.89698e-06	NA	NA,Tlr1,Tlr1
5	100162006	100167006	5	100230012	100235012	.	.	.	.	0,0,0	50	23.1796	26.3291	29.544	23.7213	13	14	14	13	0.000624846	0.0444927	0.0539207	0.000891467	NA,Tmem150c	NA
5	103738376	103743376	5	103820017	103825017	.	.	.	.	0,0,0	50	16.6353	19.4752	19.7588	25.4599	12	12	13	14	3.0288e-06	2.8171e-06	0.000899735	0.0540063	NA,Aff1,Aff1	NA
5	110987532	110992532	5	111152519	111157519	.	.	.	.	0,0,0	58	19.7874	19.5854	28.8638	22.2502	13	13	14	13	0.000624846	0.000684552	0.0539207	0.000891467	NA,Mir701	NA
5	113955012	113960012	5	113992509	113997509	.	.	.	.	0,0,0	70	18.2821	16.6542	19.8083	16.7724	12	12	13	12	3.0288e-06	2.8171e-06	0.000899735	3.89698e-06	NA	NA,Dao,Dao,Dao,Ssh1,Ssh1
5	134641666	134646666	5	134693324	134698324	.	.	.	.	0,0,0	60	29.5252	29.4515	18.7719	28.8244	14	14	12	14	0.0381449	0.0444927	3.96515e-06	0.0540063	NA,Eif4h,Eif4h	NA,Limk1
5	136395012	136400012	5	136564987	136569987	.	.	.	.	0,0,0	52	23.7139	22.7036	19.6405	27.2797	13	13	13	14	0.000624846	0.000684552	0.000899735	0.0540063	NA	NA,Cux1,Cux1,Cux1,Cux1,Cux1,Cux1,Cux1
5	139510012	139515012	5	139684967	139689967	.	.	.	.	0,0,0	50	26.3801	18.5254	21.1854	19.4704	14	12	13	12	0.0381449	2.8171e-06	0.000899735	3.89698e-06	NA,4930500L23Rik	NA
5	34529976	34534976	5	34574988	34579988	.	.	.	.	0,0,0	50	22.9653	24.8672	21.4525	23.0418	13	14	13	13	0.00199232	0.0898483	0.00288377	0.00286254	NA,Sh3bp2,Sh3bp2	NA,Add1,Add1,Add1,Add1,Add1,Add1,Add1,Mir7036b,Add1,Add1,Add1,Add1
5	110831292	110836292	5	110921234	110926234	.	.	.	.	0,0,0	64	17.782	17.9709	21.1978	19.244	12	12	13	12	1.5342e-05	1.46372e-05	0.00288377	1.99038e-05	NA,Hscb,Hscb,Hscb,Chek2,Chek2	NA
5	124437486	124442486	5	124480000	124485000	.	.	.	.	0,0,0	62	24.2421	22.1345	22.3603	17.6614	13	13	13	12	0.00199232	0.0022036	0.00288377	1.99038e-05	NA,Kmt5a,Kmt5a,Kmt5a,Kmt5a,Sbno1,Sbno1,Sbno1	NA,Snrnp35,Rilpl2
5	15935018	15940018	5	16052505	16057505	.	.	.	.	0,0,0	52	16.1036	16.8479	21.1337	15.9173	12	12	13	12	7.0485e-05	6.90113e-05	0.00827338	9.20132e-05	NA,Cacna2d1,Cacna2d1,Cacna2d1,Cacna2d1,Cacna2d1	NA
5	49995008	50000008	5	50054975	50059975	.	.	.	.	0,0,0	60	17.5543	18.9987	18.3747	23.0207	12	12	12	13	7.0485e-05	6.90113e-05	9.24471e-05	0.00826849	NA	NA,Adgra3
5	77465010	77470010	5	77570003	77575003	.	.	.	.	0,0,0	46	15.6922	14.0342	17.1168	18.467	12	11	12	12	7.0485e-05	2.53231e-07	9.24471e-05	9.20132e-05	NA,1700017L05Rik	NA
5	101985026	101990026	5	102069994	102074994	.	.	.	.	0,0,0	46	19.7057	17.5563	13.8495	20.1733	13	12	11	13	0.0057497	6.90113e-05	3.66383e-07	0.00826849	NA	NA,Wdfy3
5	105805021	105810021	5	105867526	105872526	.	.	.	.	0,0,0	46	18.4058	18.1742	15.67	20.2129	12	12	12	13	7.0485e-05	6.90113e-05	9.24471e-05	0.00826849	NA	NA,Zfp326,Zfp326
5	121735000	121740000	5	121770010	121775010	.	.	.	.	0,0,0	58	19.4914	24.0035	22.0463	21.642	12	13	13	13	7.0485e-05	0.00644834	0.00827338	0.00826849	NA,Atxn2	NA
5	24103326	24108326	5	24158336	24163336	.	.	.	.	0,0,0	44	17.6844	19.2826	18.4223	17.3136	12	12	12	12	0.000293111	0.000295744	0.000389273	0.000387596	NA,Klhl7,Klhl7	NA,Nupl2,Nupl2
5	53205004	53210004	5	53324990	53329990	.	.	.	.	0,0,0	50	15.9549	15.5794	18.4901	15.7842	12	12	12	12	0.000293111	0.000295744	0.000389273	0.000387596	NA,Sel1l3	NA
5	73428007	73433007	5	73483003	73488003	.	.	.	.	0,0,0	60	9.85008	12.4551	8.38029	23.5374	10	11	9	13	6.12642e-09	1.73377e-06	1.26888e-11	0.0219071	NA	NA,Dcun1d4,Dcun1d4,Dcun1d4,Dcun1d4
5	113585009	113590009	5	113640009	113645009	.	.	.	.	0,0,0	44	24.0268	22.78	23.6149	23.1416	13	13	13	13	0.0152065	0.017148	0.0217121	0.0219071	NA	NA,Cmklr1,Cmklr1
5	122538345	122543345	5	122621672	122626672	.	.	.	.	0,0,0	56	16.3849	17.8025	17.8348	20.6942	12	12	12	13	0.000293111	0.000295744	0.000389273	0.0219071	NA	NA,Ift81,Ift81,Ift81,Ift81
5	135398764	135403764	5	135482519	135487519	.	.	.	.	0,0,0	54	20.3233	21.6993	22.7333	19.5597	13	13	13	12	0.0152065	0.017148	0.0217121	0.000387596	NA,Pom121	NA
5	144095009	144100009	5	144149995	144154995	.	.	.	.	0,0,0	58	18.0046	19.9379	19.5974	23.0921	12	13	13	13	0.000293111	0.017148	0.0217121	0.0219071	NA,Lmtk2	NA
5	146234990	146239990	5	146280000	146285000	.	.	.	.	0,0,0	44	15.3663	17.0679	18.4519	19.481	11	12	12	12	2.12549e-06	0.000295744	0.000389273	0.000387596	NA,Cdk8,Cdk8,Cdk8	NA
5	24165003	24170003	5	24264996	24269996	.	.	.	.	0,0,0	52	21.4907	18.9853	21.1426	16.691	13	12	13	12	0.0365944	0.00113134	0.0516631	0.00144164	NA,Nupl2,Nupl2	NA,Mir684-1
5	35282495	35287495	5	35350000	35355000	.	.	.	.	0,0,0	50	17.519	18.0254	17.8158	21.6359	12	12	12	13	0.00109074	0.00113134	0.00146086	0.0521681	NA,Adra2c	NA,4930478P22Rik
5	65519972	65524972	5	65682495	65687495	.	.	.	.	0,0,0	42	20.0367	18.417	20.4375	22.0752	13	12	13	13	0.0365944	0.00113134	0.0516631	0.0521681	NA,Ube2k,Ube2k,Ube2k,Ube2k	NA,Pds5a
5	66700009	66705009	5	66755000	66760000	.	.	.	.	0,0,0	42	15.1126	14.4773	15.2677	8.15194	11	11	11	9	1.24015e-05	1.04956e-05	1.4655e-05	1.81045e-10	NA	NA,Limch1
5	73128766	73133766	5	73251246	73256246	.	.	.	.	0,0,0	66	17.7985	19.4429	22.8733	21.0321	12	12	13	13	0.00109074	0.00113134	0.0516631	0.0521681	NA	NA,Fryl
5	96377491	96382491	5	96764991	96769991	.	.	.	.	0,0,0	42	10.1857	11.9787	13.6183	15.3326	10	10	11	11	5.7751e-08	4.42904e-08	1.4655e-05	1.43615e-05	NA,Fras1	NA
5	114702495	114707495	5	114765008	114770008	.	.	.	.	0,0,0	42	22.0482	20.7724	21.81	20.7491	13	13	13	13	0.0365944	0.0411484	0.0516631	0.0521681	NA,Mir7028,Tchp,Gltp	NA,Git2,Ankrd13a,Git2,Git2,4930515G01Rik,Git2
5	122630017	122635017	5	122685017	122690017	.	.	.	.	0,0,0	58	19.4654	20.4793	22.7084	22.0748	12	13	13	13	0.00109074	0.0411484	0.0516631	0.0521681	NA,P2rx7,P2rx7,P2rx7,P2rx7	NA,Mir8115
5	134702512	134707512	5	134899987	134904987	.	.	.	.	0,0,0	46	20.0454	13.3097	12.0394	18.662	13	11	10	12	0.0365944	1.04956e-05	6.6567e-08	0.00144164	NA	NA,Tmem270,Tmem270,Cldn13
5	136473742	136478742	5	136548716	136553716	.	.	.	.	0,0,0	50	19.9646	18.1975	18.2496	20.9111	13	12	12	13	0.0365944	0.00113134	0.00146086	0.0521681	NA	NA,Cux1,Cux1,Cux1
5	146982500	146987500	5	147070004	147075004	.	.	.	.	0,0,0	52	16.0145	17.9922	21.6313	20.0934	12	12	13	13	0.00109074	0.00113134	0.0516631	0.0521681	NA	NA,Polr1d,Polr1d,Lnx2
5	24329991	24334991	5	24369983	24374983	.	.	.	.	0,0,0	58	16.5802	16.2526	17.1851	16.1518	12	12	12	12	0.00368742	0.00388347	0.0048989	0.0048709	NA,Kcnh2	NA,Nos3
5	34660000	34665000	5	34760004	34765004	.	.	.	.	0,0,0	42	12.5397	9.48288	9.08937	9.05701	11	9	9	9	6.52467e-05	1.51739e-09	2.48184e-09	2.43449e-09	NA,Grk4,Nop14,Grk4	NA,Htt
5	86885000	86890000	5	87140000	87145000	.	.	.	.	0,0,0	40	6.61558	6.52492	6.28818	9.34713	8	8	8	9	5.12414e-12	3.60795e-12	6.27098e-12	2.43449e-09	NA	NA,Ugt2b5
5	101864991	101869991	5	102070000	102075000	.	.	.	.	0,0,0	78	10.6024	8.9881	6.24927	18.169	10	9	8	12	4.90633e-07	1.51739e-09	6.27098e-12	0.0048709	NA	NA,Wdfy3
5	102705000	102710000	5	102762504	102767504	.	.	.	.	0,0,0	40	15.7476	14.8399	15.0672	12.177	12	11	11	10	0.00368742	5.79125e-05	7.84691e-05	5.83388e-07	NA	NA,Arhgap24
5	107160004	107165004	5	107280000	107285000	.	.	.	.	0,0,0	42	8.67557	9.7243	11.2709	12.482	9	9	10	11	2.05822e-09	1.51739e-09	5.593e-07	7.78082e-05	NA	NA,Tgfbr3
5	129624983	129629983	5	129679999	129684999	.	.	.	.	0,0,0	42	15.3751	16.0571	19.0889	17.0984	11	12	12	12	6.52467e-05	0.00388347	0.0048989	0.0048709	NA	NA,Zfp11
5	149377496	149382496	5	149520007	149525007	.	.	.	.	0,0,0	40	11.8585	12.0914	9.76007	15.178	10	10	9	11	4.90633e-07	3.88536e-07	2.48184e-09	7.78082e-05	NA	NA,Wdr95
5	31609999	31614999	5	31695000	31700000	.	.	.	.	0,0,0	44	16.9043	15.2717	13.5182	17.3178	12	11	11	12	0.0111176	0.000287016	0.00037403	0.0147251	NA,Mrpl33	NA,Babam2,Rbks,Babam2,Babam2,Babam2,Babam2
5	34095000	34100000	5	34199988	34204988	.	.	.	.	0,0,0	42	12.8873	14.0268	17.285	17.5742	11	11	12	12	0.000309348	0.000287016	0.0147779	0.0147251	NA	NA,Mxd4
5	41705001	41710001	5	41760005	41765005	.	.	.	.	0,0,0	38	16.9925	15.5282	10.1971	16.4808	12	11	10	12	0.0111176	0.000287016	4.27537e-06	0.0147251	NA,Rab28,Rab28,Rab28,Rab28,Rab28	NA,Nkx3-2
5	52137477	52142477	5	52235001	52240001	.	.	.	.	0,0,0	38	16.9786	17.8574	19.0776	18.9509	12	12	12	12	0.0111176	0.0119182	0.0147779	0.0147251	NA,Mir6417	NA
5	92984981	92989981	5	93090000	93095000	.	.	.	.	0,0,0	42	14.3412	15.8126	15.8871	17.5209	11	12	12	12	0.000309348	0.0119182	0.0147779	0.0147251	NA	NA,Sept11,Sept11,Sept11,Sept11
5	100076244	100081244	5	100155009	100160009	.	.	.	.	0,0,0	56	14.8974	14.7421	18.4837	16.159	11	11	12	12	0.000309348	0.000287016	0.0147779	0.0147251	NA,Tmem150cos	NA,Tmem150c
5	110105003	110110003	5	110174996	110179996	.	.	.	.	0,0,0	42	13.0796	12.7294	9.86208	16.6377	11	11	10	12	0.000309348	0.000287016	4.27537e-06	0.0147251	NA,Plcxd1,Plcxd1,Gtpbp6,Zfp605	NA,Gm15787,Gm15787,Golga3,Golga3
5	114177517	114182517	5	114304992	114309992	.	.	.	.	0,0,0	38	15.4065	15.2238	15.1634	19.2556	11	11	11	12	0.000309348	0.000287016	0.00037403	0.0147251	NA,Acacb	NA,Myo1h
5	122424992	122429992	5	122616686	122621686	.	.	.	.	0,0,0	38	12.1819	11.2861	11.8155	15.3702	10	10	10	11	3.68718e-06	3.05739e-06	4.27537e-06	0.00037049	NA,Anapc7	NA,Ift81,Ift81,Ift81,Ift81
5	129665003	129670003	5	129710007	129715007	.	.	.	.	0,0,0	50	14.703	15.1915	11.9094	16.9761	11	11	10	12	0.000309348	0.000287016	4.27537e-06	0.0147251	NA,Zfp11	NA,Sept14,Nipsnap2,Mrps17,Mrps17,Mrps17,Mrps17,Mrps17,Mrps17,Mrps17,Mrps17
5	135439992	135444992	5	135555022	135560022	.	.	.	.	0,0,0	44	13.9627	17.4486	17.5893	15.1992	11	12	12	11	0.000309348	0.0119182	0.0147779	0.00037049	NA	NA,Hip1,Ccl26
5	146184992	146189992	5	146419999	146424999	.	.	.	.	0,0,0	38	8.60809	10.7921	14.899	9.63302	9	10	11	9	2.44826e-08	3.05739e-06	0.00037403	2.8859e-08	NA,1700001J03Rik	NA
5	146377511	146382511	5	146420000	146425000	.	.	.	.	0,0,0	54	16.4723	17.2534	15.2463	16.4292	12	12	11	12	0.0111176	0.0119182	0.00037403	0.0147251	NA,Wasf3	NA
5	148954985	148959985	5	149010022	149015022	.	.	.	.	0,0,0	50	16.2919	17.7447	18.1496	17.8542	12	12	12	12	0.0111176	0.0119182	0.0147779	0.0147251	NA,8430423G03Rik	NA,Gm15408
5	149710004	149715004	5	150020002	150025002	.	.	.	.	0,0,0	38	10.1285	10.5192	12.996	16.0543	10	10	11	12	3.68718e-06	3.05739e-06	0.00037403	0.0147251	NA	NA,Rxfp2,Rxfp2,Rxfp2
5	30950018	30955018	5	30995003	31000003	.	.	.	.	0,0,0	110	11.8556	13.2494	11.1979	18.5933	10	11	10	12	2.46826e-05	0.00125832	2.8219e-05	0.0392094	NA,Preb,Preb,Abhd1,Cgref1,Abhd1,Cgref1	NA
5	31068336	31073336	5	31161650	31166650	.	.	.	.	0,0,0	48	18.3109	18.541	19.5454	16.7467	12	12	12	12	0.0296973	0.0322078	0.0390663	0.0392094	NA	NA,Mpv17,Mpv17,Mpv17,Mpv17,Mpv17
5	35599992	35604992	5	35635007	35640007	.	.	.	.	0,0,0	52	16.5615	18.9988	18.3976	18.6328	12	12	12	12	0.0296973	0.0322078	0.0390663	0.0392094	NA,4931431C16Rik	NA
5	38000000	38005000	5	38035021	38040021	.	.	.	.	0,0,0	36	14.9831	15.4274	15.607	16.9118	11	11	12	12	0.00129874	0.00125832	0.0390663	0.0392094	NA	NA,Stx18,Stx18,Stx18,Stx18
5	52144996	52149996	5	52184992	52189992	.	.	.	.	0,0,0	50	16.9422	16.1714	19.2592	18.0644	12	12	12	12	0.0296973	0.0322078	0.0390663	0.0392094	NA,Mir6417	NA,Dhx15,9230114K14Rik,Dhx15,Dhx15
5	66537517	66542517	5	66612503	66617503	.	.	.	.	0,0,0	42	15.1818	15.939	15.7699	18.7262	11	12	12	12	0.00129874	0.0322078	0.0390663	0.0392094	NA	NA,Apbb2,Apbb2,Apbb2,Apbb2,Apbb2
5	67265000	67270000	5	67310000	67315000	.	.	.	.	0,0,0	48	18.8026	17.8166	19.2323	19.4443	12	12	12	12	0.0296973	0.0322078	0.0390663	0.0392094	NA,Tmem33,Tmem33,Tmem33	NA,Slc30a9,Slc30a9
5	67757500	67762500	5	67942496	67947496	.	.	.	.	0,0,0	38	12.773	11.5003	15.3036	11.6119	11	10	11	10	0.00129874	2.10581e-05	0.00157772	2.91867e-05	NA	NA,4930425K10Rik,Gm5108
5	76654992	76659992	5	76847494	76852494	.	.	.	.	0,0,0	52	11.5636	12.5669	12.5513	18.4164	10	11	11	12	2.46826e-05	0.00125832	0.00157772	0.0392094	NA	NA,C530008M17Rik
5	88567482	88572482	5	88672496	88677496	.	.	.	.	0,0,0	36	15.6796	13.2582	18.8531	13.1292	12	11	12	11	0.0296973	0.00125832	0.0390663	0.00154596	NA,Rufy3,Rufy3,Rufy3,Rufy3,Rufy3,Rufy3,Rufy3	NA,Grsf1,Grsf1
5	99675014	99680014	5	99715007	99720007	.	.	.	.	0,0,0	46	13.7496	15.7543	17.3591	14.6034	11	12	12	11	0.00129874	0.0322078	0.0390663	0.00154596	NA	NA,A930011G23Rik
5	104054994	104059994	5	104334999	104339999	.	.	.	.	0,0,0	40	9.69576	8.4081	7.96276	14.652	9	9	9	11	2.50448e-07	1.99826e-07	3.01536e-07	0.00154596	NA,Mir5619,Nudt9	NA,Mepe
5	113651663	113656663	5	113698335	113703335	.	.	.	.	0,0,0	42	17.8308	19.3631	12.5527	17.6765	12	12	11	12	0.0296973	0.0322078	0.00157772	0.0392094	NA,Cmklr1,Cmklr1	NA
5	121219990	121224990	5	121284974	121289974	.	.	.	.	0,0,0	82	11.0485	11.6553	15.6338	10.985	10	10	12	10	2.46826e-05	2.10581e-05	0.0390663	2.91867e-05	NA,Hectd4	NA
5	123743751	123748751	5	123912492	123917492	.	.	.	.	0,0,0	38	9.43758	8.90569	6.30796	15.7965	9	9	8	12	2.50448e-07	1.99826e-07	1.86907e-09	0.0392094	NA,Rsrc2,Kntc1,Rsrc2,Rsrc2,Rsrc2,Rsrc2,Rsrc2,Rsrc2,Rsrc2,Rsrc2,Rsrc2,Rsrc2,Rsrc2,Rsrc2,Rsrc2,Rsrc2	NA,Denr
5	123829999	123834999	5	123870006	123875006	.	.	.	.	0,0,0	42	13.0879	15.4117	18.1843	13.3373	11	11	12	11	0.00129874	0.00125832	0.0390663	0.00154596	NA	NA,Hcar2,Hcar1
5	124710006	124715006	5	124764979	124769979	.	.	.	.	0,0,0	50	19.5209	14.4497	12.0117	16.5881	12	11	10	12	0.0296973	0.00125832	2.8219e-05	0.0392094	NA,Dnah10	NA
5	125419987	125424987	5	125494993	125499993	.	.	.	.	0,0,0	66	17.3508	15.3729	17.4016	16.1291	12	11	12	12	0.0296973	0.00125832	0.0390663	0.0392094	NA,Dhx37	NA
5	134295013	134300013	5	134340000	134345000	.	.	.	.	0,0,0	92	14.8032	15.7602	14.7012	19.5272	11	12	11	12	0.00129874	0.0322078	0.00157772	0.0392094	NA,Gtf2i,Gtf2i	NA
5	143725011	143730011	5	143909984	143914984	.	.	.	.	0,0,0	44	18.3684	13.5369	17.5098	13.0357	12	11	12	11	0.0296973	0.00125832	0.0390663	0.00154596	NA,Usp42	NA,Pms2,Aimp2,Aimp2
5	149647499	149652499	5	149712495	149717495	.	.	.	.	0,0,0	36	15.6698	15.4773	18.2897	13.376	12	11	12	11	0.0296973	0.00125832	0.0390663	0.00154596	NA,Hsph1,Hsph1	NA
5	25434979	25439979	5	25494986	25499986	.	.	.	.	0,0,0	34	13.8177	14.1947	15.0103	16.84	11	11	11	12	0.00477156	0.00477465	0.0057994	0.0928797	NA	NA,4831440E17Rik,Kmt2c
5	25524999	25529999	5	25700000	25705000	.	.	.	.	0,0,0	36	12.3921	14.0778	12.8589	13.2235	11	11	11	11	0.00477156	0.00477465	0.0057994	0.00569329	NA,1700096K18Rik,Cct8l1	NA,Xrcc2
5	29375000	29380000	5	29435000	29440000	.	.	.	.	0,0,0	34	14.2646	10.6002	12.4702	5.72568	11	10	11	7	0.00477156	0.000128458	0.0057994	1.50602e-10	NA,Lmbr1	NA,Nom1,Nom1,Nom1
5	29575017	29580017	5	29630011	29635011	.	.	.	.	0,0,0	52	13.9335	13.7312	13.3329	17.0136	11	11	11	12	0.00477156	0.00477465	0.0057994	0.0928797	NA,Ube3c	NA
5	30125006	30130006	5	30189986	30194986	.	.	.	.	0,0,0	34	18.8057	16.3623	14.5973	14.4527	12	12	11	11	0.0708272	0.0770009	0.0057994	0.00569329	NA	NA,Adgrf3
5	34015000	34020000	5	34125013	34130013	.	.	.	.	0,0,0	34	15.6754	14.5658	18.2661	15.5724	12	11	12	12	0.0708272	0.00477465	0.0921578	0.0928797	NA	NA,4930557J02Rik
5	35130000	35135000	5	35345000	35350000	.	.	.	.	0,0,0	34	14.9002	11.7888	9.80488	14.4594	11	10	9	11	0.00477156	0.000128458	2.73076e-06	0.00569329	NA	NA,4930478P22Rik
5	36149990	36154990	5	36312506	36317506	.	.	.	.	0,0,0	36	14.4283	15.3992	16.6223	15.988	11	11	12	12	0.00477156	0.00477465	0.0921578	0.0928797	NA	NA,Mir7689
5	73079980	73084980	5	73295006	73300006	.	.	.	.	0,0,0	34	14.2683	14.9996	16.6039	18.3069	11	11	12	12	0.00477156	0.00477465	0.0921578	0.0928797	NA	NA,1700025M24Rik,1700025M24Rik,1700025M24Rik,Ociad1,Ociad1,Ociad1,Ociad1
5	74999993	75004993	5	75034993	75039993	.	.	.	.	0,0,0	34	17.1077	18.7054	19.3666	17.547	12	12	12	12	0.0708272	0.0770009	0.0921578	0.0928797	NA	NA,Chic2
5	76855000	76860000	5	76949993	76954993	.	.	.	.	0,0,0	34	16.3232	14.7982	18.4157	18.935	12	11	12	12	0.0708272	0.00477465	0.0921578	0.0928797	NA	NA,Paics,Ppat,Paics,Paics,Paics,Paics
5	104049981	104054981	5	104109993	104114993	.	.	.	.	0,0,0	36	18.0401	17.5602	16.5571	16.8269	12	12	12	12	0.0708272	0.0770009	0.0921578	0.0928797	NA,Mir5619,Nudt9	NA,Sparcl1,Sparcl1,Sparcl1
5	108304993	108309993	5	108349981	108354981	.	.	.	.	0,0,0	34	19.27	17.1815	15.7979	17.6457	12	12	12	12	0.0708272	0.0770009	0.0921578	0.0928797	NA,Pigg,Pigg	NA,9330198I05Rik
5	110175018	110180018	5	110264987	110269987	.	.	.	.	0,0,0	50	15.7514	14.589	14.909	15.9302	12	11	11	12	0.0708272	0.00477465	0.0057994	0.0928797	NA,Gm15787,Gm15787,Golga3,Golga3	NA,Pgam5,Pgam5
5	114830006	114835006	5	114905018	114910018	.	.	.	.	0,0,0	36	16.8081	16.5846	19.0889	18.5314	12	12	12	12	0.0708272	0.0770009	0.0921578	0.0928797	NA,2610524H06Rik	NA,Oasl2,Oasl2
5	114865012	114870012	5	114935018	114940018	.	.	.	.	0,0,0	34	13.5149	14.6725	16.4996	16.3635	11	11	12	12	0.00477156	0.00477465	0.0921578	0.0928797	NA,4930519G04Rik	NA,Oasl1,Oasl1,2210016L21Rik,Oasl1
5	119560018	119565018	5	119664987	119669987	.	.	.	.	0,0,0	34	12.633	12.3497	14.6611	11.807	11	10	11	10	0.00477156	0.000128458	0.0057994	0.000169372	NA	NA,Tbx3,Tbx3
5	119584987	119589987	5	119655000	119660000	.	.	.	.	0,0,0	34	15.8149	16.7179	18.1052	16.5858	12	12	12	12	0.0708272	0.0770009	0.0921578	0.0928797	NA,AW549542	NA,Tbx3,Tbx3
5	120782511	120787511	5	120852496	120857496	.	.	.	.	0,0,0	50	15.9172	14.883	12.3215	14.0698	12	11	10	11	0.0708272	0.00477465	0.000166057	0.00569329	NA,Oas3,Oas1e,Oas1e	NA,Oas1f,Oas1h,Oas1h
5	121009993	121014993	5	121084993	121089993	.	.	.	.	0,0,0	44	15.9187	16.9291	16.9165	17.7026	12	12	12	12	0.0708272	0.0770009	0.0921578	0.0928797	NA,Rph3a,Rph3a,Rph3a	NA
5	123805016	123810016	5	123914984	123919984	.	.	.	.	0,0,0	68	17.2164	12.889	9.53464	13.5988	12	11	9	11	0.0708272	0.00477465	2.73076e-06	0.00569329	NA	NA,Ccdc62,Denr
5	124314993	124319993	5	124419986	124424986	.	.	.	.	0,0,0	56	12.2947	11.257	13.8878	9.41594	10	10	11	9	0.000143123	0.000128458	0.0057994	2.78294e-06	NA,Mphosph9,2810006K23Rik,Mphosph9,2810006K23Rik,Mphosph9	NA,Sbno1,Sbno1,Sbno1
5	125379993	125384993	5	125464981	125469981	.	.	.	.	0,0,0	34	18.3809	16.2309	16.0727	18.9623	12	12	12	12	0.0708272	0.0770009	0.0921578	0.0928797	NA,Ubc	NA,Aacs
5	131304981	131309981	5	131425012	131430012	.	.	.	.	0,0,0	34	9.00277	8.63451	9.19992	9.98415	9	9	9	10	2.34136e-06	1.92897e-06	2.73076e-06	0.000169372	NA,Wbscr17	NA,Gm29681
5	135480006	135485006	5	135545000	135550000	.	.	.	.	0,0,0	56	13.9772	14.7569	13.5817	16.9275	11	11	11	12	0.00477156	0.00477465	0.0057994	0.0928797	NA	NA,Hip1
5	137185006	137190006	5	137280006	137285006	.	.	.	.	0,0,0	34	2.97068	6.22629	1.28302	17.3604	4	7	1	12	3.47945e-18	1.23611e-10	3.51939e-27	0.0928797	NA	NA,Mir7036,Ache,Ufsp1,Mir8116,Ache
5	137389988	137394988	5	137465011	137470011	.	.	.	.	0,0,0	34	14.0821	14.6229	17.6005	17.0853	11	11	12	12	0.00477156	0.00477465	0.0921578	0.0928797	NA	NA,Zan
5	137470005	137475005	5	137640011	137645011	.	.	.	.	0,0,0	34	14.8843	12.7372	12.7818	14.5327	11	11	11	11	0.00477156	0.00477465	0.0057994	0.00569329	NA,Zan,Epo,Epo	NA,Lrch4,Gm20605,Irs3,Lrch4,Sap25
5	137924988	137929988	5	137965011	137970011	.	.	.	.	0,0,0	44	16.4476	18.4786	19.0887	16.9071	12	12	12	12	0.0708272	0.0770009	0.0921578	0.0928797	NA,Cyp3a13	NA,Gjc3,Gjc3,Azgp1
5	140420005	140425005	5	140520008	140525008	.	.	.	.	0,0,0	42	13.6175	12.0887	11.8925	15.518	11	10	10	11	0.00477156	0.000128458	0.000166057	0.00569329	NA,Mir7038,Eif3b	NA
5	142630005	142635005	5	142709988	142714988	.	.	.	.	0,0,0	34	15.1736	15.4164	12.6305	18.3479	11	11	11	12	0.00477156	0.00477465	0.0057994	0.0928797	NA,Wipi2	NA,Slc29a4
5	146382497	146387497	5	146457514	146462514	.	.	.	.	0,0,0	34	10.19	11.9573	14.9369	14.274	10	10	11	11	0.000143123	0.000128458	0.0057994	0.00569329	NA,Wasf3	NA
5	147729994	147734994	5	147840005	147845005	.	.	.	.	0,0,0	42	13.454	12.8992	10.6402	17.817	11	11	10	12	0.00477156	0.00477465	0.000166057	0.0928797	NA,Flt1,Flt1	NA
5	149070000	149075000	5	149130011	149135011	.	.	.	.	0,0,0	54	16.398	16.0889	18.9773	18.5797	12	12	12	12	0.0708272	0.0770009	0.0921578	0.0928797	NA	NA,Gm42788
5	150020000	150025000	5	150060005	150065005	.	.	.	.	0,0,0	50	16.6462	16.5385	15.3112	15.7898	12	12	11	12	0.0708272	0.0770009	0.0057994	0.0928797	NA,Rxfp2,Rxfp2,Rxfp2	NA
5	8995000	9000000	5	9055000	9060000	.	.	.	.	0,0,0	36	13.0423	12.2801	9.6481	7.28161	11	10	9	8	0.0152617	0.000680464	2.17487e-05	3.36413e-07	NA,Crot	NA
5	25104982	25109982	5	25155000	25160000	.	.	.	.	0,0,0	42	13.9211	14.2022	10.3476	14.0292	11	11	10	11	0.0152617	0.0157429	0.000834431	0.0183317	NA,Prkag2,2900005J15Rik	NA
5	38880005	38885005	5	38954988	38959988	.	.	.	.	0,0,0	32	9.97079	10.1598	10.481	11.3276	10	10	10	10	0.000722858	0.000680464	0.000834431	0.000852571	NA,Clnk	NA
5	45455016	45460016	5	45520013	45525013	.	.	.	.	0,0,0	82	12.7435	12.8406	14.5006	14.4576	11	11	11	11	0.0152617	0.0157429	0.0185848	0.0183317	NA,Qdpr,Clrn2	NA,Med28
5	65105000	65110000	5	65195000	65200000	.	.	.	.	0,0,0	36	12.8611	14.5832	14.5951	14.949	11	11	11	11	0.0152617	0.0157429	0.0185848	0.0183317	NA,Klhl5	NA,Wdr19,Wdr19,Wdr19
5	72509994	72514994	5	72705005	72710005	.	.	.	.	0,0,0	32	6.67907	8.92989	9.25276	13.8161	8	9	9	11	2.87141e-07	1.6278e-05	2.17487e-05	0.0183317	NA,Corin,Corin	NA
5	88795000	88800000	5	88880017	88885017	.	.	.	.	0,0,0	34	13.0259	11.778	15.0445	11.9874	11	10	11	10	0.0152617	0.000680464	0.0185848	0.000852571	NA	NA,Slc4a4,Slc4a4,Slc4a4,Slc4a4
5	92590011	92595011	5	92660011	92665011	.	.	.	.	0,0,0	44	13.3865	14.7521	13.0955	10.8851	11	11	11	10	0.0152617	0.0157429	0.0185848	0.000852571	NA,Stbd1	NA,Ccdc158,Ccdc158,Ccdc158,Ccdc158
5	97985000	97990000	5	98022502	98027502	.	.	.	.	0,0,0	38	10.84	11.7042	9.17579	10.8034	10	10	9	10	0.000722858	0.000680464	2.17487e-05	0.000852571	NA	NA,Antxr2
5	103750005	103755005	5	103839984	103844984	.	.	.	.	0,0,0	50	12.7098	11.7887	12.3444	13.7284	11	10	10	11	0.0152617	0.000680464	0.000834431	0.0183317	NA,Aff1,Aff1	NA
5	112214994	112219994	5	112330005	112335005	.	.	.	.	0,0,0	100	13.1769	9.76321	10.3592	15.4146	11	9	10	11	0.0152617	1.6278e-05	0.000834431	0.0183317	NA,Miat,Miat,1700028D13Rik,1700028D13Rik	NA,Tfip11,Hps4,Srrd,Hps4,Srrd,Srrd,Srrd
5	118560008	118565008	5	118644983	118649983	.	.	.	.	0,0,0	44	14.0315	13.8819	13.1613	14.8526	11	11	11	11	0.0152617	0.0157429	0.0185848	0.0183317	NA,Med13l,Med13l	NA
5	131159996	131164996	5	131420007	131425007	.	.	.	.	0,0,0	40	9.45012	9.65248	7.91206	14.0845	9	9	9	11	1.87223e-05	1.6278e-05	2.17487e-05	0.0183317	NA	NA,Gm29681
5	135012497	135017497	5	135185000	135190000	.	.	.	.	0,0,0	32	7.02984	6.98858	12.1052	6.35957	8	8	10	8	2.87141e-07	2.45511e-07	0.000834431	3.36413e-07	NA,Wbscr25,Abhd11,Abhd11os,Abhd11,Stx1a,Abhd11,Stx1a,Stx1a,Stx1a	NA,Baz1b
5	136257521	136262521	5	136564998	136569998	.	.	.	.	0,0,0	62	13.9125	12.4251	13.0901	14.1493	11	11	11	11	0.0152617	0.0157429	0.0185848	0.0183317	NA	NA,Cux1,Cux1,Cux1,Cux1,Cux1,Cux1,Cux1
5	146780012	146785012	5	146830003	146835003	.	.	.	.	0,0,0	50	13.1806	13.3527	13.5079	14.8575	11	11	11	11	0.0152617	0.0157429	0.0185848	0.0183317	NA,Usp12	NA,Rasl11a,Rpl21
5	147960010	147965010	5	148072497	148077497	.	.	.	.	0,0,0	32	12.9164	12.2661	15.0917	11.7147	11	10	11	10	0.0152617	0.000680464	0.0185848	0.000852571	NA,Mtus2,Mtus2	NA
5	149859991	149864991	5	150060008	150065008	.	.	.	.	0,0,0	42	10.1688	10.5985	14.0011	10.3898	10	10	11	10	0.000722858	0.000680464	0.0185848	0.000852571	NA,4930500F04Rik	NA
5	30244989	30249989	5	30284996	30289996	.	.	.	.	0,0,0	52	14.9164	11.2423	11.1149	14.1613	11	10	10	11	0.0422094	0.00306124	0.00361511	0.0509858	NA,Selenoi,Selenoi	NA
5	30685010	30690010	5	30849994	30854994	.	.	.	.	0,0,0	30	11.3667	9.30503	9.06213	7.97487	10	9	9	9	0.00312435	0.000118048	0.000145272	0.000148993	NA	NA,Mapre3
5	32719994	32724994	5	32779999	32784999	.	.	.	.	0,0,0	34	12.0695	13.2777	14.2416	14.5111	10	11	11	11	0.00312435	0.044602	0.0513002	0.0509858	NA	NA,Pisd
5	33194999	33199999	5	33279989	33284989	.	.	.	.	0,0,0	42	12.7627	10.5179	14.5908	6.97949	11	10	11	8	0.0422094	0.00306124	0.0513002	3.67606e-06	NA	NA,Ctbp1,Ctbp1,Ctbp1,Ctbp1,Ctbp1
5	35155016	35160016	5	35284999	35289999	.	.	.	.	0,0,0	34	14.3374	14.9318	15.3637	14.6357	11	11	11	11	0.0422094	0.044602	0.0513002	0.0509858	NA	NA,Adra2c
5	43420000	43425000	5	43500000	43505000	.	.	.	.	0,0,0	44	12.9973	12.6679	13.6488	12.9096	11	11	11	11	0.0422094	0.044602	0.0513002	0.0509858	NA	NA,C1qtnf7
5	43679989	43684989	5	43825010	43830010	.	.	.	.	0,0,0	30	8.43868	7.8329	10.892	6.17883	9	8	10	7	0.000128464	2.79224e-06	0.00361511	5.44802e-08	NA	NA,Bst1
5	44095010	44100010	5	44199994	44204994	.	.	.	.	0,0,0	36	13.0049	13.3457	13.6728	13.6144	11	11	11	11	0.0422094	0.044602	0.0513002	0.0509858	NA,Prom1,Prom1,Prom1,Prom1,Prom1,Prom1,Prom1,Prom1	NA
5	52979996	52984996	5	53104998	53109998	.	.	.	.	0,0,0	46	12.0564	11.7884	12.8268	14.1179	10	10	11	11	0.00312435	0.00306124	0.0513002	0.0509858	NA,5033403H07Rik	NA
5	53455005	53460005	5	53550005	53555005	.	.	.	.	0,0,0	34	12.0877	13.8183	14.1029	11.2046	10	11	11	10	0.00312435	0.044602	0.0513002	0.00366917	NA	NA,Rbpj
5	65970000	65975000	5	66069989	66074989	.	.	.	.	0,0,0	36	15.4329	15.1146	15.3196	13.5899	11	11	11	11	0.0422094	0.044602	0.0513002	0.0509858	NA,Chrna9	NA
5	66749986	66754986	5	66864989	66869989	.	.	.	.	0,0,0	34	11.3668	13.0945	13.5994	15.5354	10	11	11	11	0.00312435	0.044602	0.0513002	0.0509858	NA,Limch1	NA
5	67095005	67100005	5	67200005	67205005	.	.	.	.	0,0,0	32	8.47208	10.34	15.3615	10.3554	9	10	11	10	0.000128464	0.00306124	0.0513002	0.00366917	NA,Phox2b	NA
5	76585005	76590005	5	76950000	76955000	.	.	.	.	0,0,0	30	8.07912	8.13336	11.1942	6.68135	9	9	10	8	0.000128464	0.000118048	0.00361511	3.67606e-06	NA,Cep135	NA,Paics,Ppat,Paics,Paics,Paics,Paics
5	77460010	77465010	5	77760015	77765015	.	.	.	.	0,0,0	30	9.18216	7.17287	9.97618	7.39739	9	8	10	8	0.000128464	2.79224e-06	0.00361511	3.67606e-06	NA,1700017L05Rik	NA
5	98182499	98187499	5	98252499	98257499	.	.	.	.	0,0,0	38	10.2076	10.7383	13.2688	9.52114	10	10	11	9	0.00312435	0.00306124	0.0513002	0.000148993	NA,Prdm8,A730035I17Rik	NA,Fgf5,Fgf5
5	100394994	100399994	5	100450005	100455005	.	.	.	.	0,0,0	38	12.9124	12.8343	13.451	14.2158	11	11	11	11	0.0422094	0.044602	0.0513002	0.0509858	NA,Sec31a,Sec31a,Sec31a	NA
5	104239989	104244989	5	104305005	104310005	.	.	.	.	0,0,0	36	10.2322	11.9187	7.74667	14.3577	10	10	8	11	0.00312435	0.00306124	3.66851e-06	0.0509858	NA	NA,Ibsp
5	107614989	107619989	5	107720000	107725000	.	.	.	.	0,0,0	30	13.4112	14.0545	15.3261	10.6279	11	11	11	10	0.0422094	0.044602	0.0513002	0.00366917	NA	NA,Gfi1,Gfi1
5	110040015	110045015	5	110085005	110090005	.	.	.	.	0,0,0	42	13.1317	12.4861	12.8283	9.85002	11	11	11	10	0.0422094	0.044602	0.0513002	0.00366917	NA	NA,Plcxd1,Plcxd1
5	110547497	110552497	5	110639994	110644994	.	.	.	.	0,0,0	38	13.6626	12.9601	14.5399	12.9208	11	11	11	11	0.0422094	0.044602	0.0513002	0.0509858	NA,Galnt9	NA,Noc4l,Ddx51
5	117115000	117120000	5	117350010	117355010	.	.	.	.	0,0,0	34	8.27946	8.00285	12.7297	6.76292	9	9	11	8	0.000128464	0.000118048	0.0513002	3.67606e-06	NA,Suds3,Suds3,Taok3	NA,Wsb2
5	118150005	118155005	5	118245000	118250000	.	.	.	.	0,0,0	34	14.6453	12.3365	9.97917	13.8824	11	10	10	11	0.0422094	0.00306124	0.00361511	0.0509858	NA,Fbxw8	NA,Rnft2,Rnft2,2410131K14Rik
5	118794981	118799981	5	119690005	119695005	.	.	.	.	0,0,0	92	6.90245	11.5981	9.14556	15.331	8	10	9	11	3.13776e-06	0.00306124	0.000145272	0.0509858	NA	NA,Tbx3os2
5	122538339	122543339	5	122710015	122715015	.	.	.	.	0,0,0	56	10.2819	11.968	9.89482	12.4715	10	10	10	11	0.00312435	0.00306124	0.00361511	0.0509858	NA	NA,P2rx4,P2rx4,P2rx4
5	124715010	124720010	5	124860005	124865005	.	.	.	.	0,0,0	36	15.3315	8.9564	14.7882	10.1453	11	9	11	10	0.0422094	0.000118048	0.0513002	0.00366917	NA,Dnah10	NA,Ccdc92,Zfp664
5	137410000	137415000	5	137485010	137490010	.	.	.	.	0,0,0	46	12.1445	11.7756	11.7928	11.9968	10	10	10	10	0.00312435	0.00306124	0.00361511	0.00366917	NA	NA,Zan,Pop7,Epo,Epo
5	139833750	139838750	5	140137497	140142497	.	.	.	.	0,0,0	32	6.80244	6.37983	7.98879	5.17015	8	8	9	7	3.13776e-06	2.79224e-06	0.000145272	5.44802e-08	NA,Psmg3,Psmg3	NA
5	144884986	144889986	5	145055006	145060006	.	.	.	.	0,0,0	30	5.78804	9.14133	8.38459	9.83547	7	9	9	9	5.41038e-08	0.000118048	0.000145272	0.000148993	NA,Mir7039	NA,1700018F24Rik
5	147082487	147087487	5	147217502	147222502	.	.	.	.	0,0,0	38	9.91558	10.2495	9.05103	11.1687	10	10	9	10	0.00312435	0.00306124	0.000145272	0.00366917	NA,Polr1d,Polr1d,Lnx2	NA
5	24839995	24844995	5	25000004	25005004	.	.	.	.	0,0,0	30	8.83537	8.06461	7.20113	10.4261	9	9	8	10	0.000738383	0.000717831	3.37114e-05	0.0133797	NA,Rheb	NA,Prkag2
5	31692507	31697507	5	31867482	31872482	.	.	.	.	0,0,0	30	11.534	11.7409	12.2137	10.2705	10	10	10	10	0.0115665	0.011802	0.0132497	0.0133797	NA,Babam2,Rbks,Babam2,Babam2,Babam2,Babam2	NA
5	45755000	45760000	5	45855000	45860000	.	.	.	.	0,0,0	38	11.4053	10.0211	8.74996	7.93493	10	10	9	9	0.0115665	0.011802	0.000836743	0.000854993	NA	NA,Lcorl,Lcorl,Lcorl,Lcorl,Lcorl,Lcorl,Lcorl
5	66272492	66277492	5	66657497	66662497	.	.	.	.	0,0,0	28	6.71684	7.82032	7.32081	7.51984	8	8	8	8	2.87841e-05	2.69435e-05	3.37114e-05	3.32275e-05	NA,Nsun7	NA
5	92675000	92680000	5	92955000	92960000	.	.	.	.	0,0,0	32	7.62187	6.29073	9.56705	6.5153	8	8	9	8	2.87841e-05	2.69435e-05	0.000836743	3.32275e-05	NA,Shroom3,Ccdc158,Ccdc158,Ccdc158,Ccdc158	NA
5	92805000	92810000	5	92889990	92894990	.	.	.	.	0,0,0	52	7.36017	9.32694	8.94834	10.8916	8	9	9	10	2.87841e-05	0.000717831	0.000836743	0.0133797	NA,Shroom3	NA,Shroom3
5	103430004	103435004	5	103654985	103659985	.	.	.	.	0,0,0	28	8.88726	7.28712	6.9506	9.66483	9	8	8	9	0.000738383	2.69435e-05	3.37114e-05	0.000854993	NA,Ptpn13	NA,1700016H13Rik,1700016H13Rik
5	120785004	120790004	5	120920000	120925000	.	.	.	.	0,0,0	32	10.4877	11.4133	12.3124	11.3568	10	10	10	10	0.0115665	0.011802	0.0132497	0.0133797	NA,Oas3,Oas1e,Oas1e	NA,Oas1d,Oas1a
5	122484995	122489995	5	122725014	122730014	.	.	.	.	0,0,0	28	10.3095	10.3763	10.7074	12.1097	10	10	10	10	0.0115665	0.011802	0.0132497	0.0133797	NA,Atp2a2,Atp2a2,Atp2a2	NA
5	139384985	139389985	5	139684990	139689990	.	.	.	.	0,0,0	28	6.88295	8.36129	6.80787	9.4704	8	9	8	9	2.87841e-05	0.000717831	3.37114e-05	0.000854993	NA,Gpr146,Gpr146,Gpr146,Gpr146	NA
5	144039992	144044992	5	144210004	144215004	.	.	.	.	0,0,0	30	12.2303	9.71797	11.1878	8.19344	10	9	10	9	0.0115665	0.000717831	0.0132497	0.000854993	NA,Ocm	NA,Tecpr1,Tecpr1,Tecpr1
5	150765004	150770004	5	150945000	150950000	.	.	.	.	0,0,0	36	9.25092	10.0643	8.92976	9.09557	9	10	9	9	0.000738383	0.011802	0.000836743	0.000854993	NA	NA,Kl
5	4960002	4965002	5	5260000	5265000	.	.	.	.	0,0,0	26	6.19777	6.03385	8.22324	7.80118	7	7	9	8	9.37851e-06	8.6764e-06	0.0039917	0.000247555	NA	NA,Cdk14
5	5514990	5519990	5	5560009	5565009	.	.	.	.	0,0,0	32	10.9806	10.6197	10.1692	10.218	10	10	10	10	0.0359981	0.0378072	0.0409486	0.0412185	NA,Cldn12,Cldn12,Cldn12,Cldn12	NA,Gm8773,Gtpbp10,Gtpbp10,Gtpbp10
5	20909997	20914997	5	21054997	21059997	.	.	.	.	0,0,0	40	11.0805	9.12319	11.9031	10.1559	10	9	10	10	0.0359981	0.00361298	0.0409486	0.0412185	NA	NA,Ptpn12,Ptpn12
5	21055000	21060000	5	21257493	21262493	.	.	.	.	0,0,0	26	12.1368	10.5338	10.2377	10.365	10	10	10	10	0.0359981	0.0378072	0.0409486	0.0412185	NA,Ptpn12,Ptpn12	NA
5	31860013	31865013	5	32135000	32140000	.	.	.	.	0,0,0	38	5.99548	6.74946	6.02098	8.9166	7	8	7	9	9.37851e-06	0.000214713	1.00269e-05	0.00400034	NA	NA,Fosl2
5	33329990	33334990	5	33374986	33379986	.	.	.	.	0,0,0	52	10.5635	10.5071	10.1761	11.6	10	10	10	10	0.0359981	0.0378072	0.0409486	0.0412185	NA,Maea	NA,Uvssa,Uvssa,Uvssa,Uvssa
5	35055004	35060004	5	35134995	35139995	.	.	.	.	0,0,0	30	11.4911	10.1634	11.3255	11.1432	10	10	10	10	0.0359981	0.0378072	0.0409486	0.0412185	NA,Dok7,Dok7,Dok7,Dok7	NA
5	43875011	43880011	5	44184988	44189988	.	.	.	.	0,0,0	26	10.805	11.9317	9.66674	11.5202	10	10	9	10	0.0359981	0.0378072	0.0039917	0.0412185	NA,Cd38	NA
5	66000000	66005000	5	66254986	66259986	.	.	.	.	0,0,0	32	6.50047	6.44033	6.7446	5.9558	8	8	8	7	0.000217023	0.000214713	0.000244761	9.44824e-06	NA,9130230L23Rik	NA,Nsun7,Nsun7,Nsun7
5	98197502	98202502	5	98304986	98309986	.	.	.	.	0,0,0	30	8.36723	10.25	12.1276	10.5695	9	10	10	10	0.00351298	0.0378072	0.0409486	0.0412185	NA,A730035I17Rik	NA
5	99750009	99755009	5	99825009	99830009	.	.	.	.	0,0,0	30	10.0386	10.978	11.1282	9.7507	10	10	10	9	0.0359981	0.0378072	0.0409486	0.00400034	NA,Gm38413	NA
5	109555000	109560000	5	110105000	110110000	.	.	.	.	0,0,0	38	6.35795	5.18475	7.3235	3.4417	8	7	8	5	0.000217023	8.6764e-06	0.000244761	3.19174e-09	NA,Crlf2,Crlf2,Crlf2	NA,Plcxd1,Plcxd1,Gtpbp6,Zfp605
5	112454995	112459995	5	112585004	112590004	.	.	.	.	0,0,0	26	11.1581	11.0339	10.9613	9.67772	10	10	10	9	0.0359981	0.0378072	0.0409486	0.00400034	NA,Gm6588	NA,Sez6l,1700034G24Rik,1700034G24Rik,Sez6l,Sez6l
5	114310004	114315004	5	114607502	114612502	.	.	.	.	0,0,0	26	7.28839	5.75963	6.55439	7.4701	8	7	8	8	0.000217023	8.6764e-06	0.000244761	0.000247555	NA,Myo1h	NA
5	115790000	115795000	5	116024986	116029986	.	.	.	.	0,0,0	40	7.46852	7.80973	10.3966	6.90723	8	8	10	8	0.000217023	0.000214713	0.0409486	0.000247555	NA	NA,Prkab1
5	123820002	123825002	5	123975013	123980013	.	.	.	.	0,0,0	26	7.00427	6.26719	9.63143	6.52018	8	8	9	8	0.000217023	0.000214713	0.0039917	0.000247555	NA	NA,Hip1r
5	124570013	124575013	5	124710000	124715000	.	.	.	.	0,0,0	30	1.45592	4.73017	3.25172	10.1443	1	6	5	10	2.1616e-17	2.73447e-07	3.91979e-09	0.0412185	NA,Gtf2h3,Eif2b1	NA,Dnah10
5	143889995	143894995	5	143970004	143975004	.	.	.	.	0,0,0	30	6.44195	5.94122	8.7933	6.95208	8	7	9	8	0.000217023	8.6764e-06	0.0039917	0.000247555	NA,Ankrd61,Ankrd61	NA
5	150095004	150100004	5	150245000	150250000	.	.	.	.	0,0,0	26	7.89139	7.55943	9.93275	7.74382	9	8	10	8	0.00351298	0.000214713	0.0409486	0.000247555	NA	NA,Fry
5	3729986	3734986	5	3789991	3794991	.	.	.	.	0,0,0	36	8.71566	9.6024	9.60426	7.91349	9	9	9	9	0.0137964	0.0147084	0.0154667	0.0154249	NA	NA,Ankib1,Krit1,Krit1,Ankib1,Krit1,Ankib1
5	20700000	20705000	5	20870008	20875008	.	.	.	.	0,0,0	30	4.27668	4.50954	3.25524	6.85756	6	6	5	8	4.05494e-06	4.627e-06	1.05274e-07	0.00147889	NA	NA,Phtf2,Tmem60
5	25350008	25355008	5	25749995	25754995	.	.	.	.	0,0,0	28	10.9718	9.47254	8.02258	8.67416	10	9	9	9	0.0953865	0.0147084	0.0154667	0.0154249	NA	NA,Actr3b,Actr3b
5	44705008	44710008	5	44799995	44804995	.	.	.	.	0,0,0	24	9.29998	9.40587	8.61504	7.70359	9	9	9	8	0.0137964	0.0147084	0.0154667	0.00147889	NA	NA,Ldb2,Ldb2,Ldb2,Ldb2,Ldb2,Ldb2
5	57714997	57719997	5	58822502	58827502	.	.	.	.	0,0,0	30	4.93779	5.45841	5.87827	9.7272	6	7	7	9	4.05494e-06	8.88559e-05	9.42026e-05	0.0154249	NA,4932441J04Rik,Pcdh7,Pcdh7,Pcdh7,Pcdh7	NA
5	66090008	66095008	5	66229991	66234991	.	.	.	.	0,0,0	34	6.28473	6.59115	7.33304	7.71532	8	8	8	8	0.00131139	0.00138095	0.00147685	0.00147889	NA,Rbm47	NA
5	87374999	87379999	5	87425000	87430000	.	.	.	.	0,0,0	24	8.45461	9.23592	9.70981	7.65361	9	9	9	8	0.0137964	0.0147084	0.0154667	0.00147889	NA	NA,Ugt2b38
5	89447496	89452496	5	89675002	89680002	.	.	.	.	0,0,0	34	7.03741	7.876	5.92216	8.85545	8	9	7	9	0.00131139	0.0147084	9.42026e-05	0.0154249	NA,Gc	NA
5	90495004	90500004	5	90654995	90659995	.	.	.	.	0,0,0	26	9.96796	7.81657	6.42562	8.51015	10	8	8	9	0.0953865	0.00138095	0.00147685	0.0154249	NA,Afp	NA
5	90787494	90792494	5	90904990	90909990	.	.	.	.	0,0,0	34	6.5598	5.72807	6.75236	6.94723	8	7	8	8	0.00131139	8.88559e-05	0.00147685	0.00147889	NA,Cxcl15,Cxcl3	NA,Cxcl2
5	91467495	91472495	5	91947502	91952502	.	.	.	.	0,0,0	26	5.38694	5.31741	4.53748	7.07706	7	7	6	8	8.85484e-05	8.88559e-05	3.72923e-06	0.00147889	NA	NA,Rchy1,Rchy1,Thap6,Rchy1
5	103665012	103670012	5	103920004	103925004	.	.	.	.	0,0,0	26	8.50626	7.92838	8.85134	9.34071	9	9	9	9	0.0137964	0.0147084	0.0154667	0.0154249	NA,1700016H13Rik,1700016H13Rik	NA,Klhl8,Klhl8,Klhl8
5	106885000	106890000	5	107330000	107335000	.	.	.	.	0,0,0	24	5.26502	6.39117	3.87395	8.63699	7	8	5	9	8.85484e-05	0.00138095	1.05274e-07	0.0154249	NA	NA,Brdt,Brdt
5	107605005	107610005	5	107875009	107880009	.	.	.	.	0,0,0	24	6.94419	7.22161	8.67242	6.54535	8	8	9	8	0.00131139	0.00138095	0.0154667	0.00147889	NA,Glmn,Glmn,Glmn,Rpap2,Rpap2,Rpap2,Rpap2,Rpap2,Rpap2,Rpap2,Rpap2	NA,Evi5
5	108129997	108134997	5	108265004	108270004	.	.	.	.	0,0,0	34	8.28599	7.9431	8.37287	7.36319	9	9	9	8	0.0137964	0.0147084	0.0154667	0.00147889	NA,Ccdc18,Tmed5,Tmed5,Tmed5,Tmed5	NA,Dr1
5	108170000	108175000	5	108324995	108329995	.	.	.	.	0,0,0	26	6.63556	7.20687	7.4981	7.4871	8	8	8	8	0.00131139	0.00138095	0.00147685	0.00147889	NA	NA,Pigg,Pigg
5	110059995	110064995	5	110139997	110144997	.	.	.	.	0,0,0	30	7.22528	7.00022	6.09157	7.98376	8	8	7	9	0.00131139	0.00138095	9.42026e-05	0.0154249	NA	NA,Chfr,Chfr,Chfr,Chfr,Chfr
5	111669991	111674991	5	111750000	111755000	.	.	.	.	0,0,0	26	9.43818	9.46373	8.07188	8.98722	9	9	9	9	0.0137964	0.0147084	0.0154667	0.0154249	NA	NA,E130006D01Rik,E130006D01Rik,E130006D01Rik
5	115504991	115509991	5	115630000	115635000	.	.	.	.	0,0,0	24	9.31395	7.72078	9.4226	9.43004	9	8	9	9	0.0137964	0.00138095	0.0154667	0.0154249	NA,Pxn,Pxn	NA,1110006O24Rik,Mir7030,Rab35
5	116120001	116125001	5	116224987	116229987	.	.	.	.	0,0,0	34	8.8204	8.06036	8.61091	6.82011	9	9	9	8	0.0137964	0.0147084	0.0154667	0.00147889	NA,C330018A13Rik	NA
5	118169987	118174987	5	118240004	118245004	.	.	.	.	0,0,0	34	9.74411	8.81873	9.59738	9.76981	9	9	9	9	0.0137964	0.0147084	0.0154667	0.0154249	NA,Hrk	NA,Rnft2,Rnft2,2410131K14Rik
5	135100012	135105012	5	135350008	135355008	.	.	.	.	0,0,0	44	9.30016	7.4685	7.69315	6.53242	9	8	8	8	0.0137964	0.00138095	0.00147685	0.00147889	NA,Mlxipl,Mlxipl,Mlxipl,Mlxipl,Mlxipl	NA,Trim50,Fkbp6,Fkbp6,Fkbp6,Trim50,Fkbp6
5	138570000	138575000	5	138654997	138659997	.	.	.	.	0,0,0	36	9.7626	8.00387	7.57036	6.77698	9	9	8	8	0.0137964	0.0147084	0.00147685	0.00147889	NA,1700123K08Rik	NA
5	139515000	139520000	5	139740004	139745004	.	.	.	.	0,0,0	24	5.5055	5.71335	7.38957	6.17376	7	7	8	7	8.85484e-05	8.88559e-05	0.00147685	9.10705e-05	NA,4930500L23Rik	NA,Micall2
5	148564987	148569987	5	148694991	148699991	.	.	.	.	0,0,0	34	7.14088	8.29769	9.27567	8.175	8	9	9	9	0.00131139	0.0147084	0.0154667	0.0154249	NA,Ubl3,Ubl3	NA
5	149054995	149059995	5	149370008	149375008	.	.	.	.	0,0,0	24	8.55731	7.77102	9.25735	8.3582	9	8	9	9	0.0137964	0.00138095	0.0154667	0.0154249	NA,Hmgb1,Hmgb1	NA
5	149279995	149284995	5	149524995	149529995	.	.	.	.	0,0,0	28	3.74553	5.57795	5.17742	5.25577	5	7	7	7	1.38402e-07	8.88559e-05	9.42026e-05	9.10705e-05	NA	NA,Gm15997,Wdr95
5	4755006	4760006	5	4829991	4834991	.	.	.	.	0,0,0	36	8.56734	8.28517	6.27632	6.57415	9	9	8	8	0.0450188	0.0482933	0.00703196	0.00710092	NA,Fzd1	NA
5	12389991	12394991	5	12440008	12445008	.	.	.	.	0,0,0	36	9.54918	9.2353	8.36884	8.77219	9	9	9	9	0.0450188	0.0482933	0.0493812	0.049304	NA,Sema3d	NA
5	14390000	14395000	5	14524991	14529991	.	.	.	.	0,0,0	26	5.28391	6.56602	6.02963	7.10684	7	8	7	8	0.000665805	0.00702475	0.000695252	0.00710092	NA	NA,Pclo,Pclo
5	14514993	14519993	5	14804997	14809997	.	.	.	.	0,0,0	36	4.25323	5.58451	5.15139	7.15418	6	7	7	8	4.84291e-05	0.000719886	0.000695252	0.00710092	NA,Pclo,Pclo	NA
5	18355002	18360002	5	18449995	18454995	.	.	.	.	0,0,0	34	9.30784	9.04538	8.19027	8.26374	9	9	9	9	0.0450188	0.0482933	0.0493812	0.049304	NA,Gnai1	NA
5	20985008	20990008	5	21159991	21164991	.	.	.	.	0,0,0	24	8.06899	8.11526	7.5892	6.54028	9	9	8	8	0.0450188	0.0482933	0.00703196	0.00710092	NA	NA,Gsap
5	26490012	26495012	5	26594995	26599995	.	.	.	.	0,0,0	24	7.79357	6.90806	6.68749	8.16046	8	8	8	9	0.00629987	0.00702475	0.00703196	0.049304	NA,4930584F24Rik	NA
5	30700008	30705008	5	30925012	30930012	.	.	.	.	0,0,0	26	4.9156	4.80671	5.95822	4.65216	6	6	7	6	4.84291e-05	5.91206e-05	0.000695252	4.51999e-05	NA,Dpysl5,Dpysl5,Dpysl5	NA,Emilin1,Khk,Khk,Khk,Khk
5	31374991	31379991	5	31480012	31485012	.	.	.	.	0,0,0	26	4.2127	4.53675	4.86778	5.78226	6	6	6	7	4.84291e-05	5.91206e-05	4.80606e-05	0.000691176	NA	NA,Gpn1,4930548H24Rik
5	31609991	31614991	5	31909987	31914987	.	.	.	.	0,0,0	30	6.15902	7.51892	9.46393	8.20602	7	8	9	9	0.000665805	0.00702475	0.0493812	0.049304	NA,Mrpl33	NA
5	36609995	36614995	5	36684997	36689997	.	.	.	.	0,0,0	54	3.25407	4.89694	8.82087	4.62642	5	6	9	6	2.72829e-06	5.91206e-05	0.0493812	4.51999e-05	NA	NA,D5Ertd579e
5	43825008	43830008	5	44049987	44054987	.	.	.	.	0,0,0	22	7.09494	6.46036	4.39453	6.22289	8	8	6	7	0.00629987	0.00702475	4.80606e-05	0.000691176	NA,Bst1	NA
5	66000000	66005000	5	66225012	66230012	.	.	.	.	0,0,0	32	6.65842	6.39365	7.57459	6.15165	8	8	8	7	0.00629987	0.00702475	0.00703196	0.000691176	NA,9130230L23Rik	NA
5	96380003	96385003	5	96675007	96680007	.	.	.	.	0,0,0	30	5.11184	6.83941	9.52036	6.94246	7	8	9	8	0.000665805	0.00702475	0.0493812	0.00710092	NA,Fras1	NA
5	99595009	99600009	5	99729998	99734998	.	.	.	.	0,0,0	30	8.78589	8.28579	8.66079	6.95608	9	9	9	8	0.0450188	0.0482933	0.0493812	0.00710092	NA	NA,A930011G23Rik
5	100152498	100157498	5	100309992	100314992	.	.	.	.	0,0,0	42	7.1968	7.00335	6.2176	7.8714	8	8	7	9	0.00629987	0.00702475	0.000695252	0.049304	NA,Tmem150c	NA,Gm45913
5	100684992	100689992	5	100834988	100839988	.	.	.	.	0,0,0	38	6.80799	6.82105	8.33809	5.23458	8	8	9	7	0.00629987	0.00702475	0.0493812	0.000691176	NA,Coq2	NA,Gpat3
5	104004996	104009996	5	104215000	104220000	.	.	.	.	0,0,0	22	4.82849	5.32093	5.4763	7.60644	6	7	7	8	4.84291e-05	0.000719886	0.000695252	0.00710092	NA,Hsd17b11	NA,Dmp1
5	107439996	107444996	5	107595003	107600003	.	.	.	.	0,0,0	26	7.59036	5.66711	6.30726	5.42416	8	7	8	7	0.00629987	0.000719886	0.00703196	0.000691176	NA,Btbd8,Lpcat2b	NA,Glmn,Glmn,Glmn,Rpap2,Rpap2,Rpap2,Rpap2,Rpap2,Rpap2,Rpap2,Rpap2
5	107715000	107720000	5	107879992	107884992	.	.	.	.	0,0,0	22	7.46213	6.5286	6.65857	6.34871	8	8	8	8	0.00629987	0.00702475	0.00703196	0.00710092	NA,Gfi1,4930428O21Rik,Gfi1	NA,Evi5
5	113959996	113964996	5	114109988	114114988	.	.	.	.	0,0,0	22	6.91591	8.19052	9.74645	7.12987	8	9	9	8	0.00629987	0.0482933	0.0493812	0.00710092	NA	NA,Usp30
5	114019992	114024992	5	114094992	114099992	.	.	.	.	0,0,0	34	7.12002	7.56858	6.71273	8.90167	8	8	8	9	0.00629987	0.00702475	0.00703196	0.049304	NA	NA,Svop,Svop,Usp30
5	114700000	114705000	5	114854999	114859999	.	.	.	.	0,0,0	26	7.4181	8.26389	8.23313	9.80452	8	9	9	9	0.00629987	0.0482933	0.0493812	0.049304	NA,Tchp,Gltp	NA,4930519G04Rik,Mir6240
5	127800011	127805011	5	128435000	128440000	.	.	.	.	0,0,0	24	5.64306	5.40355	5.2295	6.67147	7	7	7	8	0.000665805	0.000719886	0.000695252	0.00710092	NA	NA,Tmem132d
5	136200000	136205000	5	136710000	136715000	.	.	.	.	0,0,0	32	8.10605	5.76265	7.5332	6.32672	9	7	8	8	0.0450188	0.000719886	0.00703196	0.00710092	NA,Prkrip1	NA
5	136384992	136389992	5	136669992	136674992	.	.	.	.	0,0,0	30	6.9042	9.17067	7.36339	8.7146	8	9	8	9	0.00629987	0.0482933	0.00703196	0.049304	NA,Mir721	NA
5	137810007	137815007	5	137984996	137989996	.	.	.	.	0,0,0	26	9.15253	6.88434	7.22213	6.2345	9	8	8	8	0.0450188	0.00702475	0.00703196	0.00710092	NA	NA,Azgp1
5	139835000	139840000	5	140344990	140349990	.	.	.	.	0,0,0	30	7.01753	5.84037	8.67729	5.27569	8	7	9	7	0.00629987	0.000719886	0.0493812	0.000691176	NA,Psmg3,Psmg3	NA
5	142625003	142630003	5	142819996	142824996	.	.	.	.	0,0,0	26	5.24024	6.47633	8.22204	4.36499	7	8	9	6	0.000665805	0.00702475	0.0493812	4.51999e-05	NA,Wipi2	NA,Tnrc18,Tnrc18
5	147395003	147400003	5	147749992	147754992	.	.	.	.	0,0,0	22	7.12027	7.49336	9.44685	7.46821	8	8	9	8	0.00629987	0.00702475	0.0493812	0.00710092	NA,Flt3	NA
6	72532462	72537462	6	72567500	72572500	.	.	.	.	0,0,0	72	28.3057	28.0956	33.188	23.7432	14	14	15	13	9.70368e-08	1.21312e-07	0.000251392	1.49749e-11	NA,Capg,Capg,Capg,Capg	NA
6	34695101	34700101	6	34748344	34753344	.	.	.	.	0,0,0	70	34.223	32.717	34.846	34.589	15	15	15	15	0.00147209	0.001744	0.00193476	0.00200874	NA,Cald1	NA
6	94659969	94664969	6	94695000	94700000	.	.	.	.	0,0,0	74	35.4416	33.6647	36.7645	32.1726	15	15	15	15	0.0036945	0.00432547	0.00489899	0.00505609	NA	NA,Lrig1,Lrig1
6	128441685	128446685	6	128480000	128485000	.	.	.	.	0,0,0	66	29.0911	27.04	31.839	32.9207	14	14	15	15	7.55894e-06	9.37923e-06	0.00489899	0.00505609	NA,Fkbp4,Gm10069,Gm10069	NA
6	30547485	30552485	6	30590056	30595056	.	.	.	.	0,0,0	64	37.6469	36.4336	37.6097	34.586	15	15	15	15	0.00863004	0.00990835	0.0115155	0.0119447	NA,Cpa2	NA
6	48865027	48870027	6	48907568	48912568	.	.	.	.	0,0,0	64	32.7352	32.7022	38.339	31.7774	15	15	15	15	0.00863004	0.00990835	0.0115155	0.0119447	NA,Gm7932	NA,Aoc1,Aoc1,Aoc1
6	94622473	94627473	6	94697486	94702486	.	.	.	.	0,0,0	64	20.2688	18.9037	21.8847	21.7059	13	12	13	13	1.90236e-08	3.21847e-12	2.68023e-08	2.63034e-08	NA	NA,Lrig1,Lrig1
6	124859987	124864987	6	124900056	124905056	.	.	.	.	0,0,0	80	24.6977	25.5209	28.4757	23.9852	14	14	14	13	2.8116e-05	3.47663e-05	3.90146e-05	2.63034e-08	NA,Gpr162,Gpr162,P3h3	NA,Cd4,Lag3,A230083G16Rik
6	52010983	52015983	6	52153023	52158023	.	.	.	.	0,0,0	98	21.3738	18.6927	36.227	15.9367	13	12	15	12	1.0447e-07	2.80429e-11	0.0256062	4.11102e-11	NA,Skap2	NA,Hoxaas2,Hoxa1,Hoxa1,Hoxa2,Hotairm1,Hotairm2
6	72744975	72749975	6	72786633	72791633	.	.	.	.	0,0,0	62	29.6079	29.8053	25.928	36.6174	14	14	14	15	9.71061e-05	0.000119655	0.000135863	0.0264397	NA	NA,Tcf7l1,Tcf7l1
6	86442511	86447511	6	86539976	86544976	.	.	.	.	0,0,0	62	28.4662	19.6805	16.858	27.3247	14	13	12	14	9.71061e-05	1.05436e-07	4.30814e-11	0.000138322	NA,C87436,C87436,C87436,C87436,C87436,C87436,C87436,C87436	NA
6	99480000	99485000	6	99517511	99522511	.	.	.	.	0,0,0	62	25.6996	22.2908	25.6669	18.9851	14	13	14	12	9.71061e-05	1.05436e-07	0.000135863	4.11102e-11	NA	NA,Foxp1
6	125289977	125294977	6	125334954	125339954	.	.	.	.	0,0,0	62	26.9247	29.5692	30.4845	34.0675	14	14	14	15	9.71061e-05	0.000119655	0.000135863	0.0264397	NA,Tuba3a	NA,Tnfrsf1a
6	134560022	134565022	6	134604999	134609999	.	.	.	.	0,0,0	84	33.4149	29.1249	19.4734	31.0457	15	14	12	15	0.0192299	0.000119655	4.30814e-11	0.0264397	NA,Lrp6	NA
6	81984992	81989992	6	82040014	82045014	.	.	.	.	0,0,0	106	25.4359	23.4909	35.473	18.7239	14	13	15	12	0.000315754	5.50919e-07	0.0533244	3.36723e-10	NA,Gm20383,Gm20383	NA,Eva1a
6	120608733	120613733	6	120663755	120668755	.	.	.	.	0,0,0	60	26.6805	30.1548	33.3496	27.4127	14	14	15	14	0.000315754	0.000387068	0.0533244	0.000448046	NA	NA,Cecr2
6	121009999	121014999	6	121129958	121134958	.	.	.	.	0,0,0	60	27.1154	28.9512	27.9453	37.0227	14	14	14	15	0.000315754	0.000387068	0.000446413	0.055271	NA	NA,Mical3
6	38199959	38204959	6	38239979	38244979	.	.	.	.	0,0,0	70	26.4361	30.6552	26.2229	30.8462	14	14	14	14	0.000956817	0.00118414	0.00137067	0.00137378	NA	NA,D630045J12Rik
6	31579951	31584951	6	31620038	31625038	.	.	.	.	0,0,0	56	21.0997	24.435	23.4958	27.0463	13	13	13	14	1.15321e-05	1.21293e-05	1.63764e-05	0.00385202	NA,Gm6117	NA
6	142772513	142777513	6	142812509	142817509	.	.	.	.	0,0,0	56	22.929	24.438	22.5175	25.4439	13	13	13	14	1.15321e-05	1.21293e-05	1.63764e-05	0.00385202	NA	NA,Gm7457,Sult6b2
6	82041238	82046238	6	82114999	82119999	.	.	.	.	0,0,0	54	17.3348	16.858	16.5981	19.1523	12	12	12	12	9.15139e-08	8.14775e-08	1.20339e-07	1.17076e-07	NA,Eva1a	NA
6	87277455	87282455	6	87332491	87337491	.	.	.	.	0,0,0	56	25.4231	23.6998	19.5616	18.6868	14	13	12	12	0.00702877	5.0634e-05	1.20339e-07	1.17076e-07	NA	NA,Antxr1
6	53974969	53979969	6	54028331	54033331	.	.	.	.	0,0,0	72	22.1377	23.2758	22.7402	23.0921	13	13	13	13	0.000179309	0.00019367	0.000257224	0.000255018	NA,4921529L05Rik,Cpvl,Cpvl,Cpvl	NA,Chn2
6	86027474	86032474	6	86079983	86084983	.	.	.	.	0,0,0	62	26.808	26.9614	28.5015	24.7629	14	14	14	14	0.0171209	0.0202867	0.0242977	0.024324	NA,Figla,Add2,Add2,Add2	NA,Add2,Add2,Add2
6	91175000	91180000	6	91215000	91220000	.	.	.	.	0,0,0	52	26.411	26.0685	30.529	25.1756	14	14	14	14	0.0171209	0.0202867	0.0242977	0.024324	NA	NA,Fbln2,Fbln2
6	92786668	92791668	6	92935004	92940004	.	.	.	.	0,0,0	54	14.5838	10.9847	14.9274	11.3089	11	10	11	10	6.3594e-10	1.9941e-13	7.27088e-10	3.78336e-13	NA	NA,9530026P05Rik
6	146844968	146849968	6	146880031	146885031	.	.	.	.	0,0,0	52	27.6513	30.0731	30.2972	30.176	14	14	14	14	0.0171209	0.0202867	0.0242977	0.024324	NA,Smco2	NA,Ppfibp1,Ppfibp1,Ppfibp1,Ppfibp1
6	147045015	147050015	6	147089984	147094984	.	.	.	.	0,0,0	54	27.0379	26.0032	22.5869	22.3335	14	14	13	13	0.0171209	0.0202867	0.000257224	0.000255018	NA,Rep15,Mrps35	NA,Klhl42,Mansc4
6	38874984	38879984	6	38910000	38915000	.	.	.	.	0,0,0	58	24.716	20.7032	23.3893	21.3178	14	13	13	13	0.0381449	0.000684552	0.000899735	0.000891467	NA,Hipk2,Hipk2,Hipk2	NA,Tbxas1
6	38924953	38929953	6	38960015	38965015	.	.	.	.	0,0,0	50	23.1766	23.9682	24.563	24.0292	13	13	13	13	0.000624846	0.000684552	0.000899735	0.000891467	NA,Tbxas1	NA
6	50834999	50839999	6	50914984	50919984	.	.	.	.	0,0,0	50	20.5104	22.7044	19.7735	28.4618	13	13	13	14	0.000624846	0.000684552	0.000899735	0.0540063	NA	NA,Gm31579
6	54035012	54040012	6	54157517	54162517	.	.	.	.	0,0,0	56	18.9228	20.124	25.469	19.6232	12	13	14	13	3.0288e-06	0.000684552	0.0539207	0.000891467	NA,Chn2	NA
6	66904984	66909984	6	66940000	66945000	.	.	.	.	0,0,0	50	25.4872	22.4329	23.5697	25.8512	14	13	13	14	0.0381449	0.000684552	0.000899735	0.0540063	NA,Gng12,Gng12,Gng12,Gng12,Gng12,Gng12	NA
6	72090029	72095029	6	72149022	72154022	.	.	.	.	0,0,0	58	23.1057	22.0458	18.4524	23.5356	13	13	12	13	0.000624846	0.000684552	3.96515e-06	0.000891467	NA,St3gal5,St3gal5	NA
6	72354985	72359985	6	72392537	72397537	.	.	.	.	0,0,0	60	26.6511	24.6343	21.4779	24.6945	14	14	13	14	0.0381449	0.0444927	0.000899735	0.0540063	NA,Rnf181,Rnf181,Rnf181,Rnf181,Rnf181,Rnf181,Tmem150a,Rnf181,Rnf181,Rnf181,Rnf181,Rnf181,0610030E20Rik,Usp39	NA,Vamp8,Vamp5,Vamp5
6	97755014	97760014	6	97790014	97795014	.	.	.	.	0,0,0	50	20.2408	20.9554	20.4325	24.938	13	13	13	14	0.000624846	0.000684552	0.000899735	0.0540063	NA	NA,Mitf
6	117170000	117175000	6	117430000	117435000	.	.	.	.	0,0,0	50	11.2239	9.80852	15.7294	9.94746	10	9	12	10	4.1614e-12	1.16004e-15	3.96515e-06	4.96663e-12	NA,Cxcl12,Cxcl12,Cxcl12	NA
6	119385000	119390000	6	119420029	119425029	.	.	.	.	0,0,0	52	30.1951	27.5688	28.2088	30.5139	14	14	14	14	0.0381449	0.0444927	0.0539207	0.0540063	NA,Adipor2	NA,Adipor2
6	124862492	124867492	6	124965019	124970019	.	.	.	.	0,0,0	50	18.4188	19.798	24.1906	25.1524	12	13	13	14	3.0288e-06	0.000684552	0.000899735	0.0540063	NA,Gpr162,Gpr162,P3h3	NA,Cops7a,Cops7a,Cops7a,Cops7a
6	142560027	142565027	6	142723710	142728710	.	.	.	.	0,0,0	58	11.9905	13.6745	11.4923	29.9658	10	11	10	14	4.1614e-12	4.19014e-09	5.00644e-12	0.0540063	NA,Kcnj8,Kcnj8,Kcnj8	NA
6	28789972	28794972	6	28825041	28830041	.	.	.	.	0,0,0	48	21.0726	23.1166	22.9219	22.7326	13	13	13	13	0.00199232	0.0022036	0.00288377	0.00286254	NA	NA,Lrrc4
6	91773337	91778337	6	91886675	91891675	.	.	.	.	0,0,0	48	17.758	16.0486	23.3623	15.2834	12	12	13	11	1.5342e-05	1.46372e-05	0.00288377	5.00031e-08	NA	NA,Ccdc174
6	125310013	125315013	6	125350026	125355026	.	.	.	.	0,0,0	58	21.4301	22.3471	22.6266	23.4622	13	13	13	13	0.00199232	0.0022036	0.00288377	0.00286254	NA,Scnn1a,Ltbr	NA,Tnfrsf1a
6	134039995	134044995	6	134149995	134154995	.	.	.	.	0,0,0	54	16.2535	16.3258	23.1608	13.2464	12	12	13	11	1.5342e-05	1.46372e-05	0.00288377	5.00031e-08	NA,Etv6,Etv6	NA
6	135021666	135026666	6	135078333	135083333	.	.	.	.	0,0,0	48	25.5269	23.4531	23.4454	17.2992	14	13	13	12	0.0786869	0.0022036	0.00288377	1.99038e-05	NA,Ddx47	NA
6	49035000	49040000	6	49215000	49220000	.	.	.	.	0,0,0	50	20.1093	17.9076	15.1756	19.0977	13	12	11	12	0.0057497	6.90113e-05	3.66383e-07	9.20132e-05	NA,Gpnmb	NA,Igf2bp3
6	94701661	94706661	6	94966661	94971661	.	.	.	.	0,0,0	58	12.992	12.5643	11.5662	19.1498	11	11	10	12	3.21072e-07	2.53231e-07	7.13249e-10	9.20132e-05	NA,Lrig1,Lrig1	NA
6	38872500	38877500	6	39012500	39017500	.	.	.	.	0,0,0	44	14.697	15.1402	15.7712	15.5595	11	11	12	11	2.12549e-06	1.73377e-06	0.000389273	2.40808e-06	NA,Hipk2,Hipk2,Hipk2	NA
6	47786986	47791986	6	47825992	47830992	.	.	.	.	0,0,0	52	18.8887	16.8456	17.5532	21.4163	12	12	12	13	0.000293111	0.000295744	0.000389273	0.0219071	NA,Mir704	NA,Zfp786,Pdia4,Zfp398,Zfp398
6	49279965	49284965	6	49315000	49320000	.	.	.	.	0,0,0	58	16.7883	20.9447	20.815	19.1729	12	13	13	12	0.000293111	0.017148	0.0217121	0.000387596	NA	NA,Ccdc126,Ccdc126
6	67510000	67515000	6	67545005	67550005	.	.	.	.	0,0,0	52	17.7842	18.4159	18.443	16.6271	12	12	12	12	0.000293111	0.000295744	0.000389273	0.000387596	NA	NA,Tacstd2
6	72034965	72039965	6	72074977	72079977	.	.	.	.	0,0,0	44	18.6533	20.5113	17.9344	23.1622	12	13	12	13	0.000293111	0.017148	0.000389273	0.0219071	NA,9130221F21Rik	NA
6	91574988	91579988	6	91675000	91680000	.	.	.	.	0,0,0	50	16.29	17.8658	23.9207	17.1111	12	12	13	12	0.000293111	0.000295744	0.0217121	0.000387596	NA	NA,Slc6a6
6	145864988	145869988	6	145930027	145935027	.	.	.	.	0,0,0	46	13.4209	13.032	10.9503	11.722	11	11	10	10	2.12549e-06	1.73377e-06	7.20291e-09	7.19305e-09	NA,Bhlhe41,Bhlhe41	NA,Sspn,Sspn
6	8205011	8210011	6	8250011	8255011	.	.	.	.	0,0,0	42	21.4248	18.9537	19.471	16.8344	13	12	12	12	0.0365944	0.00113134	0.00146086	0.00144164	NA,Mios,Col28a1	NA,Rpa3,Umad1,Umad1
6	31212505	31217505	6	31392516	31397516	.	.	.	.	0,0,0	42	12.9015	14.7522	15.3677	15.2057	11	11	11	11	1.24015e-05	1.04956e-05	1.4655e-05	1.43615e-05	NA,2210408F21Rik,2210408F21Rik,2210408F21Rik,2210408F21Rik,2210408F21Rik,2210408F21Rik,Lncpint,Lncpint,Lncpint	NA,Mkln1,Mkln1os
6	50119997	50124997	6	50157526	50162526	.	.	.	.	0,0,0	60	20.8384	20.2888	23.0156	19.8345	13	13	13	13	0.0365944	0.0411484	0.0516631	0.0521681	NA,Mpp6,Mpp6,Mpp6,Mpp6,Mpp6	NA
6	70954994	70959994	6	71010005	71015005	.	.	.	.	0,0,0	66	21.603	22.2179	21.9913	22.9244	13	13	13	13	0.0365944	0.0411484	0.0516631	0.0521681	NA,Foxi3	NA
6	84018322	84023322	6	84066646	84071646	.	.	.	.	0,0,0	72	23.0947	21.5877	23.4306	22.7044	13	13	13	13	0.0365944	0.0411484	0.0516631	0.0521681	NA,Dysf,Dysf,Dysf	NA
6	88630000	88635000	6	88700005	88705005	.	.	.	.	0,0,0	44	14.6397	18.2957	16.0762	23.8361	11	12	12	13	1.24015e-05	0.00113134	0.00146086	0.0521681	NA,Kbtbd12	NA
6	97535020	97540020	6	97609999	97614999	.	.	.	.	0,0,0	42	17.9859	16.3332	18.0332	17.8003	12	12	12	12	0.00109074	0.00113134	0.00146086	0.00144164	NA	NA,Frmd4b
6	114402525	114407525	6	114457494	114462494	.	.	.	.	0,0,0	42	15.4775	16.5712	17.9773	14.7874	11	12	12	11	1.24015e-05	0.00113134	0.00146086	1.43615e-05	NA,Hrh1,Hrh1,Hrh1,Hrh1,Hrh1	NA,Hrh1
6	119845009	119850009	6	119900004	119905004	.	.	.	.	0,0,0	60	19.1233	18.9124	21.8567	16.819	12	12	13	12	0.00109074	0.00113134	0.0516631	0.00144164	NA,3110021A11Rik,Erc1,Erc1,Erc1,Erc1	NA,Rad52,Rad52,Rad52,Rad52,Rad52
6	140339997	140344997	6	140415007	140420007	.	.	.	.	0,0,0	46	17.7408	17.875	16.8604	22.1784	12	12	12	13	0.00109074	0.00113134	0.00146086	0.0521681	NA	NA,Plekha5
6	147009990	147014990	6	147085028	147090028	.	.	.	.	0,0,0	42	18.3389	17.3581	21.0493	18.5746	12	12	13	12	0.00109074	0.00113134	0.0516631	0.00144164	NA	NA,Klhl42,Mansc4
6	50384999	50389999	6	50454990	50459990	.	.	.	.	0,0,0	50	17.6885	16.9616	18.4968	17.7363	12	12	12	12	0.00368742	0.00388347	0.0048989	0.0048709	NA,Osbpl3	NA,Osbpl3,Osbpl3
6	56732523	56737523	6	56782504	56787504	.	.	.	.	0,0,0	62	17.4328	17.4878	18.6821	19.2489	12	12	12	12	0.00368742	0.00388347	0.0048989	0.0048709	NA	NA,Kbtbd2,Kbtbd2,Kbtbd2,Kbtbd2,Kbtbd2,Kbtbd2
6	113169981	113174981	6	113244999	113249999	.	.	.	.	0,0,0	40	17.0879	18.7198	19.2852	18.4155	12	12	12	12	0.00368742	0.00388347	0.0048989	0.0048709	NA	NA,Mtmr14,Mtmr14,Mtmr14,Mtmr14,Mtmr14,Mtmr14,Mtmr14
6	124896255	124901255	6	125075008	125080008	.	.	.	.	0,0,0	50	8.89224	9.81808	9.71459	14.7898	9	9	9	11	2.05822e-09	1.51739e-09	2.48184e-09	7.78082e-05	NA,Cd4,Lag3	NA,Lpar5,Lpar5
6	125310009	125315009	6	125369981	125374981	.	.	.	.	0,0,0	58	20.3364	20.7577	17.3946	19.2828	13	13	12	12	0.0800953	0.0896136	0.0048989	0.0048709	NA,Scnn1a,Ltbr	NA,Plekhg6
6	129172504	129177504	6	129242486	129247486	.	.	.	.	0,0,0	40	17.6482	15.5877	19.1401	17.3059	12	12	12	12	0.00368742	0.00388347	0.0048989	0.0048709	NA,Clec2d	NA,2310001H17Rik,2310001H17Rik,2310001H17Rik
6	134041690	134046690	6	134090004	134095004	.	.	.	.	0,0,0	60	15.9038	16.0947	15.5521	18.9904	12	12	11	12	0.00368742	0.00388347	7.84691e-05	0.0048709	NA,Etv6,Etv6	NA
6	5418742	5423742	6	5488760	5493760	.	.	.	.	0,0,0	40	17.7804	15.2239	14.6086	16.0883	12	11	11	12	0.0111176	0.000287016	0.00037403	0.0147251	NA	NA,Pdk4
6	17234973	17239973	6	17269991	17274991	.	.	.	.	0,0,0	38	14.247	17.1292	16.6512	16.1943	11	12	12	12	0.000309348	0.0119182	0.0147779	0.0147251	NA	NA,Cav2,Cav2
6	29270017	29275017	6	29345000	29350000	.	.	.	.	0,0,0	44	17.7504	16.0119	12.339	17.3804	12	12	10	12	0.0111176	0.0119182	4.27537e-06	0.0147251	NA,Hilpda,Hilpda,Fam71f2,Fam71f2	NA,Calu,Calu,Calu
6	34364974	34369974	6	34449998	34454998	.	.	.	.	0,0,0	42	15.541	13.8655	12.8794	16.6434	11	11	11	12	0.000309348	0.000287016	0.00037403	0.0147251	NA,Akr1b8	NA
6	37285008	37290008	6	37450008	37455008	.	.	.	.	0,0,0	38	8.52825	7.99046	7.10359	12.284	9	9	8	10	2.44826e-08	1.83545e-08	1.14402e-10	4.3412e-06	NA,Dgki,Dgki	NA,Creb3l2
6	48807513	48812513	6	48910000	48915000	.	.	.	.	0,0,0	38	10.063	13.0159	15.5287	12.6499	10	11	11	11	3.68718e-06	0.000287016	0.00037403	0.00037049	NA	NA,Aoc1,Aoc1
6	54584995	54589995	6	54639986	54644986	.	.	.	.	0,0,0	42	15.8004	15.2492	16.6266	13.3986	12	11	12	11	0.0111176	0.000287016	0.0147779	0.00037049	NA,Plekha8,Fkbp14,Fkbp14,Fkbp14	NA
6	86844991	86849991	6	87005026	87010026	.	.	.	.	0,0,0	38	12.8915	15.6983	15.518	19.0929	11	12	11	12	0.000309348	0.0119182	0.00037403	0.0147251	NA,2610306M01Rik,Aak1,Aak1	NA,Nfu1,Nfu1
6	87779978	87784978	6	87814995	87819995	.	.	.	.	0,0,0	68	18.4307	18.6156	18.0159	19.0696	12	12	12	12	0.0111176	0.0119182	0.0147779	0.0147251	NA,Gp9	NA,Rab43,Rab43,Rab43,Rab43
6	88630017	88635017	6	88839978	88844978	.	.	.	.	0,0,0	38	13.9172	14.9152	13.7365	16.5616	11	11	11	12	0.000309348	0.000287016	0.00037403	0.0147251	NA,Kbtbd12	NA,Gm15612,Abtb1,Abtb1,Abtb1
6	99529987	99534987	6	99595000	99600000	.	.	.	.	0,0,0	38	13.6796	12.1038	13.1212	13.023	11	10	11	11	0.000309348	3.05739e-06	0.00037403	0.00037049	NA,Foxp1	NA
6	119999995	120004995	6	120190008	120195008	.	.	.	.	0,0,0	60	9.93829	9.68091	9.31382	17.7561	10	9	9	12	3.68718e-06	1.83545e-08	2.92834e-08	0.0147251	NA	NA,Ninj2
6	127366674	127371674	6	127443330	127448330	.	.	.	.	0,0,0	42	16.9494	14.4585	14.7372	14.8832	12	11	11	11	0.0111176	0.000287016	0.00037403	0.00037049	NA	NA,Parp11,Parp11,Parp11,Parp11,Parp11
6	142409991	142414991	6	142490016	142495016	.	.	.	.	0,0,0	38	14.1109	16.7198	18.8047	19.4932	11	12	12	12	0.000309348	0.0119182	0.0147779	0.0147251	NA,Spx	NA
6	146884991	146889991	6	146975000	146980000	.	.	.	.	0,0,0	54	12.34	14.2654	17.4702	16.3599	10	11	12	12	3.68718e-06	0.000287016	0.0147779	0.0147251	NA,Ppfibp1,Ppfibp1,Ppfibp1,Ppfibp1	NA
6	17170025	17175025	6	17220016	17225016	.	.	.	.	0,0,0	36	15.3952	16.2165	17.6757	14.6846	11	12	12	11	0.00129874	0.0322078	0.0390663	0.00154596	NA,Gm4876	NA
6	29044983	29049983	6	29105000	29110000	.	.	.	.	0,0,0	36	16.5063	16.2072	15.9487	14.577	12	12	12	11	0.0296973	0.0322078	0.0390663	0.00154596	NA,Lep	NA
6	40425008	40430008	6	40470008	40475008	.	.	.	.	0,0,0	36	15.621	14.6441	16.0063	14.6579	12	11	12	11	0.0296973	0.00125832	0.0390663	0.00154596	NA,E330009J07Rik	NA,Ssbp1,Ssbp1,Ssbp1,Ssbp1,Ssbp1
6	53955017	53960017	6	54029996	54034996	.	.	.	.	0,0,0	72	16.5868	13.674	11.766	16.7285	12	11	10	12	0.0296973	0.00125832	2.8219e-05	0.0392094	NA	NA,Chn2
6	57702501	57707501	6	57824985	57829985	.	.	.	.	0,0,0	42	9.83828	11.4004	13.0555	14.3824	9	10	11	11	2.50448e-07	2.10581e-05	0.00157772	0.00154596	NA,Pyurf,Lancl2	NA,Vopp1
6	66624991	66629991	6	66665016	66670016	.	.	.	.	0,0,0	36	9.74038	12.3627	18.6674	3.55161	9	10	12	5	2.50448e-07	2.10581e-05	0.0390663	1.83836e-17	NA,Vmn1r33,Vmn1r34	NA,Vmn1r35
6	83519995	83524995	6	83560004	83565004	.	.	.	.	0,0,0	50	17.8419	15.2018	18.7806	17.1689	12	11	12	12	0.0296973	0.00125832	0.0390663	0.0392094	NA,Actg2	NA,Gm21284,Stambp,Stambp,Stambp,Stambp
6	86194991	86199991	6	86269999	86274999	.	.	.	.	0,0,0	36	15.3026	15.497	17.5691	13.8228	11	11	12	11	0.00129874	0.00125832	0.0390663	0.00154596	NA,Tgfa	NA
6	86440004	86445004	6	86667504	86672504	.	.	.	.	0,0,0	38	11.2567	9.699	8.82542	14.1711	10	9	9	11	2.46826e-05	1.99826e-07	3.01536e-07	0.00154596	NA,C87436,C87436,C87436,C87436,C87436,C87436,C87436,C87436	NA,Snrnp27,Mxd1
6	108099992	108104992	6	108209999	108214999	.	.	.	.	0,0,0	36	14.0111	12.7242	16.2755	12.0321	11	11	12	10	0.00129874	0.00125832	0.0390663	2.91867e-05	NA	NA,Itpr1
6	113630015	113635015	6	113719984	113724984	.	.	.	.	0,0,0	54	14.5538	12.0451	17.8744	10.7656	11	10	12	10	0.00129874	2.10581e-05	0.0390663	2.91867e-05	NA,Irak2,Irak2,Vhl	NA,Ghrl,Ghrl,Ghrl,Ghrl,Ghrl
6	122340000	122345000	6	122387505	122392505	.	.	.	.	0,0,0	42	12.3607	12.6674	17.2764	12.1046	10	11	12	10	2.46826e-05	0.00125832	0.0390663	2.91867e-05	NA,Phc1,Phc1,Phc1,Phc1,Phc1	NA,1700063H04Rik
6	145594992	145599992	6	145740007	145745007	.	.	.	.	0,0,0	36	9.43901	11.395	12.2333	11.8207	9	10	10	10	2.50448e-07	2.10581e-05	2.8219e-05	2.91867e-05	NA	NA,Rassf8
6	17360000	17365000	6	17460000	17465000	.	.	.	.	0,0,0	48	13.8613	11.613	10.197	13.2344	11	10	10	11	0.00477156	0.000128458	0.000166057	0.00569329	NA	NA,Met
6	29518343	29523343	6	29641678	29646678	.	.	.	.	0,0,0	44	9.5261	9.32966	8.63172	12.3157	9	9	9	10	2.34136e-06	1.92897e-06	2.73076e-06	0.000169372	NA,Irf5,Irf5,Irf5,Kcp	NA
6	30740015	30745015	6	30905015	30910015	.	.	.	.	0,0,0	34	2.80289	6.13659	12.3031	4.80417	4	7	10	6	3.47945e-18	1.23611e-10	0.000166057	5.01554e-13	NA,Mest,Mest,Mir335,Mest	NA,Tsga13,Copg2,Copg2
6	38742496	38747496	6	38865007	38870007	.	.	.	.	0,0,0	58	13.0572	14.6338	15.6384	15.5442	11	11	12	11	0.00477156	0.00477465	0.0921578	0.00569329	NA	NA,Hipk2,Hipk2,Hipk2
6	47194992	47199992	6	47230014	47235014	.	.	.	.	0,0,0	48	18.8245	19.2292	18.4917	19.5274	12	12	12	12	0.0708272	0.0770009	0.0921578	0.0928797	NA	NA,Cntnap2
6	49060009	49065009	6	49192512	49197512	.	.	.	.	0,0,0	58	11.6931	13.6705	18.1358	12.1039	10	11	12	10	0.000143123	0.00477465	0.0921578	0.000169372	NA,Malsu1	NA
6	52662496	52667496	6	52722499	52727499	.	.	.	.	0,0,0	44	13.1065	14.4552	15.508	18.9117	11	11	11	12	0.00477156	0.00477465	0.0057994	0.0928797	NA	NA,Tax1bp1,Tax1bp1,Tax1bp1
6	67450000	67455000	6	67549992	67554992	.	.	.	.	0,0,0	34	10.6949	8.10627	8.38016	9.48796	10	9	9	9	0.000143123	1.92897e-06	2.73076e-06	2.78294e-06	NA	NA,4930515G16Rik
6	73422510	73427510	6	73465007	73470007	.	.	.	.	0,0,0	44	19.0214	19.018	17.5237	19.3595	12	12	12	12	0.0708272	0.0770009	0.0921578	0.0928797	NA	NA,1700065L07Rik,4931417E11Rik
6	87689985	87694985	6	87761670	87766670	.	.	.	.	0,0,0	34	14.1626	13.4	15.1162	12.228	11	11	11	10	0.00477156	0.00477465	0.0057994	0.000169372	NA,1810020O05Rik	NA,Gp9
6	94699985	94704985	6	94770010	94775010	.	.	.	.	0,0,0	34	17.3772	16.6136	18.4844	17.9172	12	12	12	12	0.0708272	0.0770009	0.0921578	0.0928797	NA,Lrig1,Lrig1	NA
6	97855007	97860007	6	97994989	97999989	.	.	.	.	0,0,0	40	12.6247	13.1159	11.4549	18.0871	11	11	10	12	0.00477156	0.00477465	0.000166057	0.0928797	NA	NA,Mitf
6	100775006	100780006	6	100830000	100835000	.	.	.	.	0,0,0	52	13.0935	13.9012	18.36	19.32	11	11	12	12	0.00477156	0.00477465	0.0921578	0.0928797	NA	NA,Ppp4r2
6	112490000	112495000	6	112644979	112649979	.	.	.	.	0,0,0	34	10.5489	10.346	16.2591	9.07969	10	10	12	9	0.000143123	0.000128458	0.0921578	2.78294e-06	NA,Oxtr	NA
6	113120020	113125020	6	113314996	113319996	.	.	.	.	0,0,0	42	12.3162	10.4787	7.77766	18.9313	10	10	8	12	0.000143123	0.000128458	2.75959e-08	0.0928797	NA	NA,Brpf1,Brpf1,Ogg1,Brpf1,Brpf1,Ogg1
6	117932510	117937510	6	118002503	118007503	.	.	.	.	0,0,0	46	17.5033	15.5355	19.2409	19.2024	12	11	12	12	0.0708272	0.00477465	0.0921578	0.0928797	NA,Fxyd4,Fxyd4	NA,Rasgef1a,Rasgef1a,Rasgef1a
6	127164993	127169993	6	127319993	127324993	.	.	.	.	0,0,0	34	10.4405	15.6347	15.4323	12.4292	10	12	11	11	0.000143123	0.0770009	0.0057994	0.00569329	NA	NA,Gm38404
6	134449993	134454993	6	134569979	134574979	.	.	.	.	0,0,0	34	14.3085	17.6794	17.8998	13.1033	11	12	12	11	0.00477156	0.0770009	0.0921578	0.00569329	NA	NA,Lrp6
6	135274976	135279976	6	135354993	135359993	.	.	.	.	0,0,0	64	12.0949	16.4355	14.0776	18.5497	10	12	11	12	0.000143123	0.0770009	0.0057994	0.0928797	NA	NA,Emp1,Emp1,Emp1
6	145364993	145369993	6	145444991	145449991	.	.	.	.	0,0,0	54	14.0714	12.3054	14.5412	11.3461	11	10	11	10	0.00477156	0.000128458	0.0057994	0.000169372	NA	NA,Lmntd1
6	30735000	30740000	6	30955000	30960000	.	.	.	.	0,0,0	32	5.00894	7.16953	12.2558	7.8601	7	8	10	9	3.15671e-09	2.45511e-07	0.000834431	2.22427e-05	NA,Mest,Mest,Mir335,Mest	NA,Klf14
6	30800003	30805003	6	30927483	30932483	.	.	.	.	0,0,0	50	10.3472	6.12557	11.0015	3.58658	10	7	10	5	0.000722858	2.46978e-09	0.000834431	5.3108e-14	NA	NA,Tsga13
6	39424986	39429986	6	39505006	39510006	.	.	.	.	0,0,0	34	12.4754	13.7761	13.5285	15.2388	11	11	11	11	0.0152617	0.0157429	0.0185848	0.0183317	NA,Mkrn1,Mkrn1,Gm10244	NA
6	41274986	41279986	6	41314980	41319980	.	.	.	.	0,0,0	44	14.9611	14.6578	14.4049	14.9547	11	11	11	11	0.0152617	0.0157429	0.0185848	0.0183317	NA	NA,Try5
6	49724980	49729980	6	49814996	49819996	.	.	.	.	0,0,0	34	12.0674	12.617	14.4781	12.3469	10	11	11	10	0.000722858	0.0157429	0.0185848	0.000852571	NA	NA,Npy
6	50304999	50309999	6	50385000	50390000	.	.	.	.	0,0,0	38	15.0974	13.2467	15.291	15.3194	11	11	11	11	0.0152617	0.0157429	0.0185848	0.0183317	NA	NA,Osbpl3
6	51215006	51220006	6	51265000	51270000	.	.	.	.	0,0,0	42	10.6106	10.6272	14.1089	11.3022	10	10	11	10	0.000722858	0.000680464	0.0185848	0.000852571	NA	NA,Mir148a
6	65790003	65795003	6	65845016	65850016	.	.	.	.	0,0,0	32	11.8633	12.2013	14.645	11.2502	10	10	11	10	0.000722858	0.000680464	0.0185848	0.000852571	NA,Prdm5,Prdm5	NA
6	71639993	71644993	6	71700019	71705019	.	.	.	.	0,0,0	32	14.7515	13.7536	14.2464	13.6559	11	11	11	11	0.0152617	0.0157429	0.0185848	0.0183317	NA,Kdm3a,Kdm3a,Kdm3a	NA,Reep1
6	83352503	83357503	6	83675000	83680000	.	.	.	.	0,0,0	32	8.88054	7.85012	8.56933	11.4181	9	9	9	10	1.87223e-05	1.6278e-05	2.17487e-05	0.000852571	NA,Bola3,Bola3,Bola3	NA,Cd207
6	94549987	94554987	6	94695000	94700000	.	.	.	.	0,0,0	32	9.45199	10.8308	12.6862	14.0158	9	10	11	11	1.87223e-05	0.000680464	0.0185848	0.0183317	NA	NA,Lrig1,Lrig1
6	112845019	112850019	6	112937503	112942503	.	.	.	.	0,0,0	34	13.0163	14.2365	14.2664	15.3603	11	11	11	11	0.0152617	0.0157429	0.0185848	0.0183317	NA	NA,Srgap3
6	113439993	113444993	6	113530002	113535002	.	.	.	.	0,0,0	42	11.3565	11.3483	12.7497	11.6911	10	10	11	10	0.000722858	0.000680464	0.0185848	0.000852571	NA,Jagn1,Jagn1,Cidec,Cidec,Jagn1	NA,Emc3,Fancd2,Fancd2
6	116265019	116270019	6	116334993	116339993	.	.	.	.	0,0,0	32	14.3032	14.3485	11.8279	13.5153	11	11	10	11	0.0152617	0.0157429	0.000834431	0.0183317	NA,Zfand4,Zfand4,Zfand4	NA,March8,March8,March8,March8
6	125275002	125280002	6	125409997	125414997	.	.	.	.	0,0,0	50	11.3139	9.95483	10.4491	11.5798	10	10	10	10	0.000722858	0.000680464	0.000834431	0.000852571	NA,4930417O13Rik,Tuba3a	NA
6	130049996	130054996	6	130367496	130372496	.	.	.	.	0,0,0	48	1.66917	2.98782	5.25862	9.72233	2	4	7	9	7.66027e-22	1.50492e-16	3.19777e-09	2.22427e-05	NA,Klra18,Klra4,Klra4	NA,Klra22,Klra15
6	137404996	137409996	6	137729987	137734987	.	.	.	.	0,0,0	32	13.9558	10.0529	8.66492	14.9893	11	10	9	11	0.0152617	0.000680464	2.17487e-05	0.0183317	NA,Ptpro,Ptpro	NA,Strap
6	5163353	5168353	6	5380006	5385006	.	.	.	.	0,0,0	30	8.70633	8.9418	8.80653	14.0157	9	9	9	11	0.000128464	0.000118048	0.000145272	0.0509858	NA	NA,Asb4,Asb4
6	22365012	22370012	6	22415000	22420000	.	.	.	.	0,0,0	38	11.0013	11.0587	14.4204	12.5761	10	10	11	11	0.00312435	0.00306124	0.0513002	0.0509858	NA,Fam3c	NA
6	30104990	30109990	6	30185018	30190018	.	.	.	.	0,0,0	72	12.0145	12.8284	14.0791	13.5336	10	11	11	11	0.00312435	0.044602	0.0513002	0.0509858	NA	NA,BB283400,Mirc35hg,Mirc35hg
6	34507503	34512503	6	34879992	34884992	.	.	.	.	0,0,0	40	7.12047	7.74882	8.85547	6.98698	8	8	9	8	3.13776e-06	2.79224e-06	0.000145272	3.67606e-06	NA	NA,3110062M04Rik,3110062M04Rik,3110062M04Rik
6	35059993	35064993	6	35130000	35135000	.	.	.	.	0,0,0	30	14.6939	14.3702	12.9984	15.0799	11	11	11	11	0.0422094	0.044602	0.0513002	0.0509858	NA	NA,Cnot4,Cnot4,Cnot4,Cnot4,Cnot4
6	39190010	39195010	6	39274985	39279985	.	.	.	.	0,0,0	50	14.6594	15.1032	14.4891	15.4324	11	11	11	11	0.0422094	0.044602	0.0513002	0.0509858	NA,Kdm7a	NA
6	42274992	42279992	6	42365007	42370007	.	.	.	.	0,0,0	40	11.3739	12.3758	13.6065	13.7919	10	10	11	11	0.00312435	0.00306124	0.0513002	0.0509858	NA,Clcn1,Casp2,Clcn1	NA,2010310C07Rik,Epha1
6	47839981	47844981	6	47877503	47882503	.	.	.	.	0,0,0	30	6.08619	13.2741	15.4399	14.268	7	11	11	11	5.41038e-08	0.044602	0.0513002	0.0509858	NA,Zfp786,Zfp398,Zfp398	NA,Zfp282
6	48655012	48660012	6	48720006	48725006	.	.	.	.	0,0,0	38	12.3007	12.8535	15.0303	11.6854	10	11	11	10	0.00312435	0.044602	0.0513002	0.00366917	NA,Gimap8,Gimap8,Gimap8	NA,Gimap6,Gimap7
6	52000009	52005009	6	52174979	52179979	.	.	.	.	0,0,0	98	7.81781	6.73004	13.5645	5.09584	8	8	11	7	3.13776e-06	2.79224e-06	0.0513002	5.44802e-08	NA,Skap2	NA,Hoxaas2,Hoxa2,Gm15050,Hoxa4
6	66575003	66580003	6	66622515	66627515	.	.	.	.	0,0,0	30	12.1998	12.7651	12.9379	11.7647	10	11	11	10	0.00312435	0.044602	0.0513002	0.00366917	NA	NA,Vmn1r33,Vmn1r34
6	83209987	83214987	6	83319987	83324987	.	.	.	.	0,0,0	36	12.333	12.6796	15.2541	12.1956	10	11	11	10	0.00312435	0.044602	0.0513002	0.00366917	NA	NA,Mthfd2,Mob1a
6	85174985	85179985	6	85330008	85335008	.	.	.	.	0,0,0	36	10.8069	13.0743	13.3093	15.2298	10	11	11	11	0.00312435	0.044602	0.0513002	0.0509858	NA,Emx1	NA,Mir705,Sfxn5
6	85810018	85815018	6	85864993	85869993	.	.	.	.	0,0,0	66	12.6585	11.6182	14.7996	15.0299	11	10	11	11	0.0422094	0.00306124	0.0513002	0.0509858	NA,Nat8f5,Nat8f6	NA,Nat8f2
6	86595011	86600011	6	86664982	86669982	.	.	.	.	0,0,0	44	9.26109	9.3059	9.37641	10.5138	9	9	9	10	0.000128464	0.000118048	0.000145272	0.00366917	NA	NA,Mxd1
6	87520000	87525000	6	87660011	87665011	.	.	.	.	0,0,0	30	10.0125	10.5693	11.6442	14.1037	10	10	10	11	0.00312435	0.00306124	0.00361511	0.0509858	NA,Arhgap25,Arhgap25	NA,Aplf,Aplf
6	99904994	99909994	6	100282497	100287497	.	.	.	.	0,0,0	30	6.47077	7.44068	8.36987	4.45765	8	8	9	6	3.13776e-06	2.79224e-06	0.000145272	4.75751e-10	NA	NA,Rybp
6	113034999	113039999	6	113095005	113100005	.	.	.	.	0,0,0	42	12.5255	12.9926	11.8778	12.6128	11	11	10	11	0.0422094	0.044602	0.00361511	0.0509858	NA,Thumpd3,Thumpd3	NA,Setd5
6	114775002	114780002	6	114910011	114915011	.	.	.	.	0,0,0	48	12.7484	11.4502	11.3596	15.1741	11	10	10	11	0.0422094	0.00306124	0.00361511	0.0509858	NA	NA,Vgll4
6	116965000	116970000	6	117160000	117165000	.	.	.	.	0,0,0	30	11.0253	8.95449	9.84843	11.0419	10	9	9	10	0.00312435	0.000118048	0.000145272	0.00366917	NA	NA,Cxcl12,Cxcl12,Cxcl12
6	118300005	118305005	6	118365005	118370005	.	.	.	.	0,0,0	30	13.3126	13.4087	14.9602	13.5463	11	11	11	11	0.0422094	0.044602	0.0513002	0.0509858	NA,Gm30498	NA
6	118465000	118470000	6	118505011	118510011	.	.	.	.	0,0,0	34	8.53172	11.2117	13.1316	4.59584	9	10	11	6	0.000128464	0.00306124	0.0513002	4.75751e-10	NA,Zfp9,Zfp248,Zfp248,Zfp248,Zfp248	NA
6	118750005	118755005	6	118825011	118830011	.	.	.	.	0,0,0	32	13.4612	14.0323	13.1447	13.7039	11	11	11	11	0.0422094	0.044602	0.0513002	0.0509858	NA,Cacna1c	NA
6	127321666	127326666	6	127446664	127451664	.	.	.	.	0,0,0	34	13.2989	10.6813	8.34389	14.5487	11	10	9	11	0.0422094	0.00306124	0.000145272	0.0509858	NA	NA,Parp11,Parp11,Parp11,Parp11,Parp11
6	136980011	136985011	6	137165002	137170002	.	.	.	.	0,0,0	34	7.81904	8.42332	9.56239	7.87718	8	9	9	9	3.13776e-06	0.000118048	0.000145272	0.000148993	NA	NA,Rerg,Rerg,Rerg
6	137305000	137310000	6	137395000	137400000	.	.	.	.	0,0,0	38	14.0835	14.1044	11.5215	14.6237	11	11	10	11	0.0422094	0.044602	0.00361511	0.0509858	NA	NA,Ptpro,Ptpro
6	142525005	142530005	6	142560011	142565011	.	.	.	.	0,0,0	40	14.5123	12.5698	13.8499	12.1389	11	11	11	10	0.0422094	0.044602	0.0513002	0.00366917	NA	NA,Kcnj8,Kcnj8,Kcnj8
6	145440005	145445005	6	145819982	145824982	.	.	.	.	0,0,0	36	12.966	11	15.1741	15.557	11	10	11	11	0.0422094	0.00306124	0.0513002	0.0509858	NA,Lmntd1	NA
6	148435007	148440007	6	148680005	148685005	.	.	.	.	0,0,0	32	11.1642	11.3911	10.6681	13.124	10	10	10	11	0.00312435	0.00306124	0.00361511	0.0509858	NA,Tmtc1,Tmtc1	NA,4930528G23Rik
6	148785017	148790017	6	148884988	148889988	.	.	.	.	0,0,0	34	11.3813	12.8851	13.8687	12.7579	10	11	11	11	0.00312435	0.044602	0.0513002	0.0509858	NA	NA,Caprin2,Caprin2
6	149417502	149422502	6	149477508	149482508	.	.	.	.	0,0,0	34	13.3854	12.9544	13.4491	10.9768	11	11	11	10	0.0422094	0.044602	0.0513002	0.00366917	NA,Bicd1,Bicd1	NA
6	18400016	18405016	6	18519988	18524988	.	.	.	.	0,0,0	30	8.13778	7.2448	7.07838	7.09801	9	8	8	8	0.000738383	2.69435e-05	3.37114e-05	3.32275e-05	NA	NA,Cttnbp2,Cttnbp2
6	30549990	30554990	6	30720015	30725015	.	.	.	.	0,0,0	72	9.17385	10.9344	10.4715	12.2898	9	10	10	10	0.000738383	0.011802	0.0132497	0.0133797	NA,Cpa2	NA,Mest
6	48180011	48185011	6	48395016	48400016	.	.	.	.	0,0,0	28	8.98658	8.15846	9.55698	8.42297	9	9	9	9	0.000738383	0.000717831	0.000836743	0.000854993	NA	NA,Krba1,Krba1,Krba1,Gm16630,Gm16630,Krba1,Krba1
6	49005000	49010000	6	49395000	49400000	.	.	.	.	0,0,0	36	6.57488	5.29631	5.19645	7.63934	8	7	7	8	2.87841e-05	6.84754e-07	8.44304e-07	3.32275e-05	NA,4930563H07Rik	NA,Stk31
6	54705000	54710000	6	55165005	55170005	.	.	.	.	0,0,0	30	6.71021	6.0397	6.75802	6.88872	8	7	8	8	2.87841e-05	6.84754e-07	3.37114e-05	3.32275e-05	NA	NA,Inmt
6	97820016	97825016	6	97934994	97939994	.	.	.	.	0,0,0	30	7.2044	8.86182	8.2819	8.55688	8	9	9	9	2.87841e-05	0.000717831	0.000836743	0.000854993	NA	NA,Mitf
6	108525005	108530005	6	108655010	108660010	.	.	.	.	0,0,0	34	8.05724	8.06357	7.06701	11.3332	9	9	8	10	0.000738383	0.000717831	3.37114e-05	0.0133797	NA	NA,Bhlhe40,0610040F04Rik
6	115025016	115030016	6	115260005	115265005	.	.	.	.	0,0,0	28	10.6795	8.19647	7.39947	10.8731	10	9	8	10	0.0115665	0.000717831	3.37114e-05	0.0133797	NA,Tamm41	NA,Timp4,Timp4,Timp4
6	118819989	118824989	6	118885016	118890016	.	.	.	.	0,0,0	28	10.7899	10.9711	10.4867	10.1769	10	10	10	10	0.0115665	0.011802	0.0132497	0.0133797	NA	NA,4931430N09Rik
6	120580001	120585001	6	120665007	120670007	.	.	.	.	0,0,0	58	8.23816	9.38788	8.35982	12.1004	9	9	9	10	0.000738383	0.000717831	0.000836743	0.0133797	NA	NA,Cecr2
6	122939989	122944989	6	123000016	123005016	.	.	.	.	0,0,0	28	11.2155	9.82103	8.53493	8.58426	10	9	9	9	0.0115665	0.000717831	0.000836743	0.000854993	NA,Clec4a3,Clec4a3	NA,Clec4a4
6	125185010	125190010	6	125250000	125255000	.	.	.	.	0,0,0	34	8.98037	10.2399	8.03132	10.6641	9	10	9	10	0.000738383	0.011802	0.000836743	0.0133797	NA,Mrpl51,Ncapd2,Mir3098,Scarna10	NA,4930417O13Rik
6	4744997	4749997	6	5104997	5109997	.	.	.	.	0,0,0	34	5.23222	6.03703	5.9768	7.25109	7	7	7	8	9.37851e-06	8.6764e-06	1.00269e-05	0.000247555	NA,Sgce,Sgce,Sgce,Peg10,Sgce,Sgce,Peg10	NA
6	5184994	5189994	6	5385000	5390000	.	.	.	.	0,0,0	30	10.6025	9.7703	8.52165	10.2553	10	9	9	10	0.0359981	0.00361298	0.0039917	0.0412185	NA,Pon1	NA,Asb4,Asb4
6	13610003	13615003	6	13665008	13670008	.	.	.	.	0,0,0	50	10.6373	10.4304	9.91129	8.83043	10	10	10	9	0.0359981	0.0378072	0.0409486	0.00400034	NA,Tmem168,Tmem168	NA,Bmt2
6	27819989	27824989	6	27920005	27925005	.	.	.	.	0,0,0	26	8.67671	8.66306	6.81719	9.10057	9	9	8	9	0.00351298	0.00361298	0.000244761	0.00400034	NA	NA,Mir592
6	30820010	30825010	6	30955007	30960007	.	.	.	.	0,0,0	36	9.54946	7.62083	10.852	6.2308	9	8	10	7	0.00351298	0.000214713	0.0409486	9.44824e-06	NA	NA,Klf14
6	42279986	42284986	6	42344986	42349986	.	.	.	.	0,0,0	44	7.89882	8.74428	10.1109	8.99017	9	9	10	9	0.00351298	0.00361298	0.0409486	0.00400034	NA,Clcn1,Clcn1	NA,Zyx,Zyx,Zyx,Zyx
6	50625000	50630000	6	50665005	50670005	.	.	.	.	0,0,0	44	9.88177	10.6645	10.7978	12.145	10	10	10	10	0.0359981	0.0378072	0.0409486	0.0412185	NA	NA,Npvf
6	58545001	58550001	6	58585010	58590010	.	.	.	.	0,0,0	26	10.4462	8.65582	12.3714	8.53052	10	9	10	9	0.0359981	0.00361298	0.0409486	0.00400034	NA	NA,Abcg2,Abcg2
6	84495015	84500015	6	84579994	84584994	.	.	.	.	0,0,0	30	12.1049	11.7894	9.80714	11.4726	10	10	9	10	0.0359981	0.0378072	0.0039917	0.0412185	NA	NA,Cyp26b1,Cyp26b1
6	88555005	88560005	6	88910005	88915005	.	.	.	.	0,0,0	26	12.1018	9.84358	9.24737	7.02532	10	9	9	8	0.0359981	0.00361298	0.0039917	0.000247555	NA	NA,Mcm2,Tpra1
6	88730005	88735005	6	88834997	88839997	.	.	.	.	0,0,0	30	11.23	9.53905	10.6569	11.5428	10	9	10	10	0.0359981	0.00361298	0.0409486	0.0412185	NA,Mgll,Mgll,Mgll,Mgll	NA,Gm15612,Abtb1,Abtb1,Abtb1
6	89149998	89154998	6	89225005	89230005	.	.	.	.	0,0,0	34	2.2693	5.85391	5.22763	9.46389	3	7	7	9	6.34378e-13	8.6764e-06	1.00269e-05	0.00400034	NA,Gm1965,Gm1965,Gm1965,Gm1965	NA,Gm839
6	91520005	91525005	6	91685000	91690000	.	.	.	.	0,0,0	34	7.7664	8.94906	11.1008	8.0941	8	9	10	9	0.000217023	0.00361298	0.0409486	0.00400034	NA,Lsm3,Xpc	NA,Slc6a6
6	92850005	92855005	6	92930005	92935005	.	.	.	.	0,0,0	32	9.64515	9.35245	7.51817	12.2037	9	9	8	10	0.00351298	0.00361298	0.000244761	0.0412185	NA	NA,9530026P05Rik
6	115239985	115244985	6	115520011	115525011	.	.	.	.	0,0,0	90	8.61816	11.5132	9.843	11.2497	9	10	9	10	0.00351298	0.0378072	0.0039917	0.0412185	NA,Syn2,Timp4,Timp4,Timp4	NA
6	117175015	117180015	6	117240010	117245010	.	.	.	.	0,0,0	36	12.3605	10.7232	11.4703	11.4808	10	10	10	10	0.0359981	0.0378072	0.0409486	0.0412185	NA,Cxcl12,Cxcl12,Cxcl12	NA
6	122739994	122744994	6	122855015	122860015	.	.	.	.	0,0,0	30	8.97974	9.31721	10.5798	11.4306	9	9	10	10	0.00351298	0.00361298	0.0409486	0.0412185	NA,Slc2a3	NA,C3ar1
6	123860000	123865000	6	124005000	124010000	.	.	.	.	0,0,0	26	6.7342	7.85495	9.9265	6.18361	8	9	10	7	0.000217023	0.00361298	0.0409486	9.44824e-06	NA,Vmn2r25	NA
6	124275005	124280005	6	124340010	124345010	.	.	.	.	0,0,0	36	10.7302	12.1036	10.8254	10.2037	10	10	10	10	0.0359981	0.0378072	0.0409486	0.0412185	NA	NA,1700013D24Rik
6	124480010	124485010	6	124640000	124645000	.	.	.	.	0,0,0	26	6.91689	6.33921	4.88837	7.94919	8	8	6	9	0.000217023	0.000214713	2.33749e-07	0.00400034	NA,C1rl	NA,C1s2
6	137445010	137450010	6	137565010	137570010	.	.	.	.	0,0,0	26	11.1192	11.0448	10.6676	11.4692	10	10	10	10	0.0359981	0.0378072	0.0409486	0.0412185	NA	NA,Eps8,Eps8
6	138035000	138040000	6	138145005	138150005	.	.	.	.	0,0,0	32	8.84399	7.67531	6.71344	8.63897	9	8	8	9	0.00351298	0.000214713	0.000244761	0.00400034	NA	NA,Mgst1,Mgst1,Mgst1,Mgst1,Mgst1,Mgst1,Mgst1
6	4601674	4606674	6	4733339	4738339	.	.	.	.	0,0,0	28	8.65901	8.61327	8.78806	8.54464	9	9	9	9	0.0137964	0.0147084	0.0154667	0.0154249	NA,Casd1	NA,Sgce,Sgce,Sgce,Peg10,Sgce,Sgce,Peg10
6	11932502	11937502	6	12117502	12122502	.	.	.	.	0,0,0	24	5.20392	6.15906	7.06051	8.8363	7	7	8	9	8.85484e-05	8.88559e-05	0.00147685	0.0154249	NA,Phf14,Phf14,Phf14	NA,Gm6578
6	17979990	17984990	6	18019995	18024995	.	.	.	.	0,0,0	32	8.14805	8.57161	8.07728	8.37119	9	9	9	9	0.0137964	0.0147084	0.0154667	0.0154249	NA	NA,Wnt2
6	28479995	28484995	6	29024995	29029995	.	.	.	.	0,0,0	26	6.74145	6.19983	5.35718	8.64374	8	7	7	9	0.00131139	8.88559e-05	9.42026e-05	0.0154249	NA,Snd1	NA,Mir129-1
6	38385004	38390004	6	38529987	38534987	.	.	.	.	0,0,0	32	10.1293	7.82641	8.72359	9.19059	10	8	9	9	0.0953865	0.00138095	0.0154667	0.0154249	NA,Ttc26	NA,Fmc1
6	39359995	39364995	6	39559999	39564999	.	.	.	.	0,0,0	26	6.6032	6.68673	6.82704	9.76101	8	8	8	9	0.00131139	0.00138095	0.00147685	0.0154249	NA,Slc37a3	NA,Adck2,Dennd2a
6	42387496	42392496	6	42573760	42578760	.	.	.	.	0,0,0	26	8.4595	8.16678	7.30058	9.76229	9	9	8	9	0.0137964	0.0147084	0.00147685	0.0154249	NA,Tas2r143	NA
6	47835002	47840002	6	48089985	48094985	.	.	.	.	0,0,0	34	8.52437	6.53079	5.39289	6.59149	9	8	7	8	0.0137964	0.00138095	9.42026e-05	0.00147889	NA,Zfp786,Zfp398,Zfp398	NA,Zfp746,Zfp746,Zfp746
6	51380000	51385000	6	51850004	51855004	.	.	.	.	0,0,0	24	6.82612	5.68801	4.98597	7.92551	8	7	7	9	0.00131139	8.88559e-05	9.42026e-05	0.0154249	NA,Gm6559	NA
6	70969985	70974985	6	71134987	71139987	.	.	.	.	0,0,0	84	8.85792	8.36229	7.52048	8.83347	9	9	8	9	0.0137964	0.0147084	0.00147685	0.0154249	NA	NA,Thnsl2,Thnsl2
6	71894995	71899995	6	72334995	72339995	.	.	.	.	0,0,0	26	9.87062	6.36408	5.33336	8.44654	10	8	7	9	0.0953865	0.00138095	9.42026e-05	0.0154249	NA,Polr1a,Ptcd3,Ptcd3,Ptcd3,Ptcd3,Ptcd3	NA,0610030E20Rik,Usp39
6	86460000	86465000	6	86665014	86670014	.	.	.	.	0,0,0	38	5.49284	7.47637	9.62806	9.79531	7	8	9	9	8.85484e-05	0.00138095	0.0154667	0.0154249	NA	NA,Mxd1
6	87759999	87764999	6	87820014	87825014	.	.	.	.	0,0,0	68	9.10225	8.67618	8.58605	8.57156	9	9	9	9	0.0137964	0.0147084	0.0154667	0.0154249	NA	NA,Rab43,Rab43,Rab43,Rab43
6	91894990	91899990	6	92155004	92160004	.	.	.	.	0,0,0	26	5.3998	6.5661	8.51463	6.4076	7	8	9	8	8.85484e-05	0.00138095	0.0154667	0.00147889	NA,4930590J08Rik	NA
6	95499987	95504987	6	95729987	95734987	.	.	.	.	0,0,0	32	6.55085	7.54861	9.27931	6.73184	8	8	9	8	0.00131139	0.00138095	0.0154667	0.00147889	NA	NA,Suclg2
6	118625012	118630012	6	119114988	119119988	.	.	.	.	0,0,0	50	11.0838	8.52615	7.60454	9.00477	10	9	8	9	0.0953865	0.0147084	0.00147685	0.0154249	NA	NA,Cacna1c,Cacna1c,Cacna1c,Cacna1c,Cacna1c,Cacna1c
6	119949985	119954985	6	120190000	120195000	.	.	.	.	0,0,0	40	7.37104	7.49784	7.01249	9.53108	8	8	8	9	0.00131139	0.00138095	0.00147685	0.0154249	NA	NA,Ninj2
6	128855000	128860000	6	129048320	129053320	.	.	.	.	0,0,0	26	6.27214	6.43011	6.76838	7.08911	8	8	8	8	0.00131139	0.00138095	0.00147685	0.00147889	NA	NA,Klrb1f,Klrb1f,Klrb1f
6	133790004	133795004	6	133840000	133845000	.	.	.	.	0,0,0	24	1.75156	3.26867	5.71843	2.50069	2	5	7	4	4.12224e-13	1.48564e-07	9.42026e-05	1.69896e-09	NA	NA,Kap
6	139624985	139629985	6	139720009	139725009	.	.	.	.	0,0,0	26	1.94105	4.76359	3.11835	9.45219	2	6	4	9	4.12224e-13	4.627e-06	1.67764e-09	0.0154249	NA,Pik3c2g	NA
6	140177497	140182497	6	140424995	140429995	.	.	.	.	0,0,0	24	8.76937	9.77927	8.46232	8.97384	9	9	9	9	0.0137964	0.0147084	0.0154667	0.0154249	NA	NA,Plekha5
6	145599999	145604999	6	145695004	145700004	.	.	.	.	0,0,0	30	9.15011	9.40991	7.47545	8.82433	9	9	8	9	0.0137964	0.0147084	0.00147685	0.0154249	NA,Tuba3b	NA
6	148815004	148820004	6	149000000	149005000	.	.	.	.	0,0,0	24	7.6623	8.30405	9.83232	9.47623	8	9	9	9	0.00131139	0.0147084	0.0154667	0.0154249	NA,Ipo8	NA
6	6467497	6472497	6	6577497	6582497	.	.	.	.	0,0,0	28	6.59157	6.90745	7.07453	5.76263	8	8	8	7	0.00629987	0.00702475	0.00703196	0.000691176	NA	NA,Sem1
6	11997507	12002507	6	12120007	12125007	.	.	.	.	0,0,0	32	7.62055	6.76796	7.11143	8.58458	8	8	8	9	0.00629987	0.00702475	0.00703196	0.049304	NA	NA,Gm6578
6	16765004	16770004	6	16849985	16854985	.	.	.	.	0,0,0	24	7.92497	8.13074	9.25204	7.3324	9	9	9	8	0.0450188	0.0482933	0.0493812	0.00710092	NA,Gm36669	NA
6	28424985	28429985	6	28519995	28524995	.	.	.	.	0,0,0	26	6.06871	6.56821	9.35609	7.57537	7	8	9	8	0.000665805	0.00702475	0.0493812	0.00710092	NA,Fscn3,Arf5,Gcc1	NA
6	31659998	31664998	6	31844990	31849990	.	.	.	.	0,0,0	32	7.56672	7.37527	9.18727	6.79987	8	8	9	8	0.00629987	0.00702475	0.0493812	0.00710092	NA,Gm13848	NA
6	35400000	35405000	6	35550004	35555004	.	.	.	.	0,0,0	36	5.76475	8.29579	8.22222	7.62946	7	9	9	8	0.000665805	0.0482933	0.0493812	0.00710092	NA	NA,Mtpn
6	38669990	38674990	6	38809995	38814995	.	.	.	.	0,0,0	24	8.05639	9.02608	9.02243	9.48028	9	9	9	9	0.0450188	0.0482933	0.0493812	0.049304	NA,Clec2l	NA
6	42634998	42639998	6	42860000	42865000	.	.	.	.	0,0,0	28	5.92306	6.35503	7.27391	6.87492	7	8	8	8	0.000665805	0.00702475	0.00703196	0.00710092	NA,Tcaf2	NA
6	49830009	49835009	6	50099999	50104999	.	.	.	.	0,0,0	22	6.07447	7.18885	6.81935	8.92407	7	8	8	9	0.000665805	0.00702475	0.00703196	0.049304	NA,Npy	NA,Mpp6,Mpp6,Mpp6,Mpp6,Mpp6
6	50665000	50670000	6	50865013	50870013	.	.	.	.	0,0,0	26	5.92925	6.33087	7.81713	6.25927	7	8	8	8	0.000665805	0.00702475	0.00703196	0.00710092	NA,Npvf	NA
6	54590000	54595000	6	54990000	54995000	.	.	.	.	0,0,0	32	6.65352	7.20754	7.40494	7.46381	8	8	8	8	0.00629987	0.00702475	0.00703196	0.00710092	NA,Plekha8,Plekha8,Fkbp14,Fkbp14,Fkbp14	NA,Ggct
6	54780009	54785009	6	55005000	55010000	.	.	.	.	0,0,0	24	7.90108	5.80812	5.89773	5.78678	9	7	7	7	0.0450188	0.000719886	0.000695252	0.000691176	NA	NA,Ggct
6	67325000	67330000	6	67390000	67395000	.	.	.	.	0,0,0	26	9.76229	9.09688	8.86216	7.73627	9	9	9	8	0.0450188	0.0482933	0.0493812	0.00710092	NA,Il12rb2	NA
6	67470000	67475000	6	67540004	67545004	.	.	.	.	0,0,0	26	6.69382	6.78084	7.16675	5.49911	8	8	8	7	0.00629987	0.00702475	0.00703196	0.000691176	NA	NA,Tacstd2
6	71614995	71619995	6	71880009	71885009	.	.	.	.	0,0,0	24	3.02293	4.57176	6.70183	3.98472	4	6	8	6	1.19538e-07	5.91206e-05	0.00703196	4.51999e-05	NA,Kdm3a	NA
6	83439995	83444995	6	83570000	83575000	.	.	.	.	0,0,0	26	6.68687	7.38892	6.77132	8.23615	8	8	8	9	0.00629987	0.00702475	0.00703196	0.049304	NA,Tet3,Tet3,B230319C09Rik	NA,Gm21284,Stambp,Stambp,Stambp,Stambp
6	83544990	83549990	6	83615009	83620009	.	.	.	.	0,0,0	22	7.73635	7.88001	6.27712	6.24108	8	9	8	8	0.00629987	0.0482933	0.00703196	0.00710092	NA,Actg2	NA
6	83580004	83585004	6	83739986	83744986	.	.	.	.	0,0,0	28	6.81142	6.76173	8.51941	8.2557	8	8	9	9	0.00629987	0.00702475	0.0493812	0.049304	NA,Gm21284,Stambp,Stambp,Stambp,Stambp	NA,Atp6v1b1
6	86805010	86810010	6	86999996	87004996	.	.	.	.	0,0,0	34	9.33069	8.26487	9.64772	8.93784	9	9	9	9	0.0450188	0.0482933	0.0493812	0.049304	NA,Anxa4	NA,Nfu1,Nfu1
6	87835013	87840013	6	88090009	88095009	.	.	.	.	0,0,0	22	9.41873	6.87157	5.89265	9.04472	9	8	7	9	0.0450188	0.00702475	0.000695252	0.049304	NA,Cnbp,Cnbp,Cnbp,Cnbp,Isy1,Cnbp	NA,Rpn1,Mir6376
6	89367491	89372491	6	89637493	89642493	.	.	.	.	0,0,0	26	6.32175	5.83488	6.89375	6.85591	8	7	8	8	0.00629987	0.000719886	0.00703196	0.00710092	NA,Plxna1	NA,Txnrd3,Txnrd3,Txnrd3,Txnrd3
6	100285008	100290008	6	100440008	100445008	.	.	.	.	0,0,0	22	9.68315	8.55627	8.45199	8.44077	9	9	9	9	0.0450188	0.0482933	0.0493812	0.049304	NA,Rybp	NA
6	112490002	112495002	6	113009993	113014993	.	.	.	.	0,0,0	26	4.55342	5.16424	8.88601	4.11217	6	7	9	6	4.84291e-05	0.000719886	0.0493812	4.51999e-05	NA,Oxtr	NA
6	113155004	113160004	6	113369999	113374999	.	.	.	.	0,0,0	24	6.60053	6.31464	8.63357	4.86916	8	8	9	6	0.00629987	0.00702475	0.0493812	4.51999e-05	NA	NA,Arpc4,Arpc4,Tada3,Arpc4
6	113329991	113334991	6	113430013	113435013	.	.	.	.	0,0,0	24	8.96442	8.04226	9.40713	7.72409	9	9	9	8	0.0450188	0.0482933	0.0493812	0.00710092	NA,Camk1,Ogg1,Ogg1	NA,Jagn1,Jagn1,Cidec,Cidec,Rpusd3,Jagn1,Rpusd3
6	114930000	114935000	6	115265000	115270000	.	.	.	.	0,0,0	24	6.16148	4.51212	7.65696	5.10782	7	6	8	7	0.000665805	5.91206e-05	0.00703196	0.000691176	NA,Vgll4	NA
6	124954991	124959991	6	125070000	125075000	.	.	.	.	0,0,0	26	7.8658	9.2816	7.02919	9.03768	9	9	8	9	0.0450188	0.0482933	0.00703196	0.049304	NA,Cops7a,Cops7a,Cops7a,Cops7a	NA,Lpar5,Lpar5
6	133730000	133735000	6	133850008	133855008	.	.	.	.	0,0,0	30	2.62963	6.57812	5.88657	8.21259	4	8	7	9	1.19538e-07	0.00702475	0.000695252	0.049304	NA	NA,Kap
6	143535004	143540004	6	143759995	143764995	.	.	.	.	0,0,0	22	4.82545	5.89926	5.61449	8.82723	6	7	7	9	4.84291e-05	0.000719886	0.000695252	0.049304	NA,4930579D09Rik	NA
6	147017510	147022510	6	147237502	147242502	.	.	.	.	0,0,0	30	5.64195	5.04881	4.84732	7.57645	7	7	6	8	0.000665805	0.000719886	4.80606e-05	0.00710092	NA,Rep15	NA,Gm15767,Gm15767
6	148409986	148414986	6	148900006	148905006	.	.	.	.	0,0,0	26	8.32871	7.86839	5.56123	9.82681	9	9	7	9	0.0450188	0.0482933	0.000695252	0.049304	NA	NA,Caprin2,Caprin2
7	132931684	132936684	7	132968314	132973314	.	.	.	.	0,0,0	106	25.7983	30.5301	29.7802	30.0918	14	14	14	14	3.69506e-22	4.59913e-22	6.00712e-22	5.64843e-22	NA,Zranb1,Zranb1,Zranb1,Zranb1	NA
7	45303301	45308301	7	45341603	45346603	.	.	.	.	0,0,0	100	31.0448	36.3279	37.7396	30.3665	15	15	15	14	3.66181e-13	4.76546e-13	4.94588e-13	4.89488e-19	NA	NA,Trpm4,Hrc
7	16810000	16815000	7	16855000	16860000	.	.	.	.	0,0,0	90	40.4951	36.8353	35.328	37.9884	16	15	15	15	0.00538549	7.31155e-06	7.48298e-06	7.70693e-06	NA,Fkrp,Strn4,Strn4,Fkrp	NA,Prkd2,Prkd2
7	27192519	27197519	7	27227519	27232519	.	.	.	.	0,0,0	78	44.6636	39.2208	37.8542	40.7838	16	16	15	16	0.00538549	0.00645974	7.48298e-06	0.00743002	NA,BC024978,Mir1191,Snrpa,Snrpa,Snrpa,Mia,BC024978,BC024978	NA,Coq8b,Itpkc
7	127360000	127365000	7	127403326	127408326	.	.	.	.	0,0,0	86	32.7666	36.7991	32.2175	43.7932	15	15	15	16	5.77781e-06	7.31155e-06	7.48298e-06	0.00743002	NA,Zfp747	NA,Zfp764,Mir684-1,E430018J23Rik,Zfp764
7	16879939	16884939	7	16919939	16924939	.	.	.	.	0,0,0	76	40.4421	40.5453	44.3035	42.8066	16	16	16	16	0.0117054	0.0135774	0.0158292	0.0161365	NA,Gng8,Dact3,9330104G04Rik	NA,Calm3
7	110744951	110749951	7	110784932	110789932	.	.	.	.	0,0,0	80	36.451	42.031	32.6419	48.4875	15	16	15	16	0.000192337	0.0528797	0.000251392	0.0646383	NA	NA,Ampd3
7	45244981	45249981	7	45285030	45290030	.	.	.	.	0,0,0	68	29.9437	35.985	29.402	35.774	14	15	14	15	1.8701e-06	0.001744	2.63979e-06	0.00200874	NA,Cd37,Cd37,Slc6a16,Cd37	NA,Slc6a21
7	46810000	46815000	7	46849975	46854975	.	.	.	.	0,0,0	74	32.9735	32.4128	32.8614	33.7347	15	15	15	15	0.00147209	0.001744	0.00193476	0.00200874	NA	NA,Ldha,Ldha,Ldhc,Ldha
7	30590000	30595000	7	30625000	30630000	.	.	.	.	0,0,0	72	37.4286	31.0312	37.5649	32.0619	15	15	15	15	0.0036945	0.00432547	0.00489899	0.00505609	NA,Mir3569,Kmt2b,Zbtb32,Kmt2b,Zbtb32	NA,Upk1a,Etv2,Cox6b1,Cox6b1
7	101417488	101422488	7	101542488	101547488	.	.	.	.	0,0,0	66	31.0006	19.9344	20.5486	24.1048	15	13	13	13	0.0036945	3.18063e-09	4.52821e-09	4.41534e-09	NA,Pde2a,Pde2a,Pde2a	NA,Art2a-ps
7	45402499	45407499	7	45437516	45442516	.	.	.	.	0,0,0	78	33.5486	28.5946	30.4284	29.4787	15	14	14	14	0.00863004	3.47663e-05	3.90146e-05	3.97569e-05	NA,Snrnp70,Kcna7,Snrnp70,Snrnp70,Ntf5	NA,Ruvbl2,Gys1
7	138856669	138861669	7	138898309	138903309	.	.	.	.	0,0,0	64	26.0888	32.1287	34.0089	31.2581	14	15	15	15	2.8116e-05	0.00990835	0.0115155	0.0119447	NA,Ppp2r2d,Mapk1ip1,Ppp2r2d,Mapk1ip1	NA,Bnip3
7	27290039	27295039	7	27325039	27330039	.	.	.	.	0,0,0	64	34.7642	29.0901	33.0527	37.2993	15	14	15	15	0.0192299	0.000119655	0.0256062	0.0264397	NA	NA,Ltbp4,Ltbp4,Ltbp4
7	130834962	130839962	7	130869981	130874981	.	.	.	.	0,0,0	72	20.593	28.4218	30.7177	22.2171	13	14	14	13	1.0447e-07	0.000119655	0.000135863	1.44651e-07	NA	NA,Plekha1,Plekha1,Plekha1
7	25097528	25102528	7	25187546	25192546	.	.	.	.	0,0,0	60	20.1462	22.1025	22.0031	37.7441	13	13	13	15	5.37625e-07	5.50919e-07	7.67142e-07	0.055271	NA,Mir6537	NA
7	34148997	34153997	7	34215970	34220970	.	.	.	.	0,0,0	60	25.3593	25.7129	25.3494	27.3364	14	14	14	14	0.000315754	0.000387068	0.000446413	0.000448046	NA	NA,Gpi1
7	73724945	73729945	7	73760036	73765036	.	.	.	.	0,0,0	60	28.49	31.3085	31.7245	28.434	14	15	15	14	0.000315754	0.0441069	0.0533244	0.000448046	NA,Fam174b	NA
7	109975013	109980013	7	110054973	110059973	.	.	.	.	0,0,0	72	20.2419	21.8601	36.7182	21.8059	13	13	15	13	5.37625e-07	5.50919e-07	0.0533244	7.49769e-07	NA,Tmem41b	NA,Snora23,Zfp143
7	112225000	112230000	7	112269982	112274982	.	.	.	.	0,0,0	64	27.0319	29.6403	29.0644	28.3923	14	14	14	14	0.000315754	0.000387068	0.000446413	0.000448046	NA,Mical2,Mical2	NA
7	131370000	131375000	7	131407534	131412534	.	.	.	.	0,0,0	60	23.8227	27.5166	28.5737	29.3699	13	14	14	14	5.37625e-07	0.000387068	0.000446413	0.000448046	NA,2310057M21Rik,2310057M21Rik,Pstk,Pstk	NA,Acadsb,Ikzf5
7	99659990	99664990	7	99705015	99710015	.	.	.	.	0,0,0	58	21.6359	24.7639	30.5158	28.2002	13	14	14	14	2.60047e-06	0.00118414	0.00137067	0.00137378	NA	NA,Slco2b1,Slco2b1,Slco2b1
7	16464968	16469968	7	16499976	16504976	.	.	.	.	0,0,0	58	20.9941	21.8443	23.0557	20.4688	13	13	13	13	1.15321e-05	1.21293e-05	1.63764e-05	1.61125e-05	NA,Tmem160,Npas1	NA
7	27155015	27160015	7	27285031	27290031	.	.	.	.	0,0,0	56	25.6918	22.8715	22.3606	28.0773	14	13	13	14	0.00268484	1.21293e-05	1.63764e-05	0.00385202	NA,Cyp2t4,Egln2,Egln2	NA
7	27479970	27484970	7	27524955	27529955	.	.	.	.	0,0,0	54	21.6479	21.5212	16.2507	20.4536	13	13	12	13	4.76276e-05	5.0634e-05	1.20339e-07	6.7155e-05	NA,Sertad1,Sertad3	NA,Hipk4
7	89326452	89331452	7	89402871	89407871	.	.	.	.	0,0,0	54	14.3019	16.256	12.9583	24.0581	11	12	11	13	6.73791e-11	8.14775e-08	7.81963e-11	6.7155e-05	NA,Tmem135,Tmem135	NA,Fzd4,Tmem135
7	97914971	97919971	7	97950043	97955043	.	.	.	.	0,0,0	54	29.7411	30.817	29.8019	30.2862	14	14	14	14	0.00702877	0.00848507	0.0101081	0.0100593	NA,Gdpd4	NA
7	100188330	100193330	7	100233342	100238342	.	.	.	.	0,0,0	94	22.9505	23.2827	28.1768	25.3673	13	13	14	14	4.76276e-05	5.0634e-05	0.0101081	0.0100593	NA,Kcne3,Kcne3,Kcne3,Kcne3,Kcne3,Kcne3,Kcne3	NA,Pgm2l1
7	101996661	102001661	7	102076661	102081661	.	.	.	.	0,0,0	54	19.8281	18.424	20.6078	21.0329	13	12	13	13	4.76276e-05	8.14775e-08	6.72711e-05	6.7155e-05	NA	NA,Xndc1,Rnf121,Xntrpc,Xntrpc,Trpc2,Xndc1,Rnf121
7	142062000	142067000	7	142100989	142105989	.	.	.	.	0,0,0	54	18.602	17.1518	22.7106	14.7386	12	12	13	11	9.15139e-08	8.14775e-08	6.72711e-05	7.76987e-11	NA,Mob2,Mob2,Mob2	NA,Dusp8
7	16145000	16150000	7	16182493	16187493	.	.	.	.	0,0,0	62	20.8546	26.7807	25.589	21.2461	13	14	14	13	0.000179309	0.0202867	0.0242977	0.000255018	NA	NA,Meis3,Meis3,Meis3,Meis3,Meis3
7	46390008	46395008	7	46555013	46560013	.	.	.	.	0,0,0	58	19.3261	19.4282	26.0425	17.2833	12	12	14	12	5.51969e-07	5.03044e-07	0.0242977	7.06697e-07	NA,Kcnc1,Kcnc1	NA
7	79939973	79944973	7	79990019	79995019	.	.	.	.	0,0,0	52	23.7247	23.1253	24.8403	19.1696	13	13	14	12	0.000179309	0.00019367	0.0242977	7.06697e-07	NA,Arpin	NA
7	107669978	107674978	7	107704991	107709991	.	.	.	.	0,0,0	68	28.1229	28.8635	28.8372	25.6074	14	14	14	14	0.0171209	0.0202867	0.0242977	0.024324	NA,Ppfibp2,Ppfibp2	NA
7	142385000	142390000	7	142424987	142429987	.	.	.	.	0,0,0	78	27.3993	26.8831	24.8689	28.9466	14	14	14	14	0.0171209	0.0202867	0.0242977	0.024324	NA,Ifitm10,Ctsd	NA,Syt8,Syt8,Syt8,Syt8,Syt8,Tnni2
7	31102487	31107487	7	31172475	31177475	.	.	.	.	0,0,0	50	20.6793	16.5579	12.3924	25.8389	13	12	11	14	0.000624846	2.8171e-06	6.27638e-09	0.0540063	NA,Hpn,Hpn,Hpn	NA,Gm10640
7	43794981	43799981	7	43855036	43860036	.	.	.	.	0,0,0	50	20.9402	22.4789	21.1474	25.6531	13	13	13	14	0.000624846	0.000684552	0.000899735	0.0540063	NA,Klk8,Klk8,Klk7,Klk9	NA
7	45019987	45024987	7	45064963	45069963	.	.	.	.	0,0,0	60	25.3082	22.8551	28.4259	23.0873	14	13	14	13	0.0381449	0.000684552	0.0539207	0.000891467	NA,Rras,Mir7054,Rras,Rras,Scaf1	NA,Prrg2,Nosip,Nosip,Prr12
7	66349963	66354963	7	66384981	66389981	.	.	.	.	0,0,0	50	24.724	26.4958	29.8945	28.126	14	14	14	14	0.0381449	0.0444927	0.0539207	0.0540063	NA	NA,Lrrk1,Mir7057
7	67963016	67968016	7	68064013	68069013	.	.	.	.	0,0,0	50	17.9823	18.4921	25.6963	17.5659	12	12	14	12	3.0288e-06	2.8171e-06	0.0539207	3.89698e-06	NA,Igf1r	NA
7	79274997	79279997	7	79315004	79320004	.	.	.	.	0,0,0	76	22.2149	26.0082	26.8538	28.2694	13	14	14	14	0.000624846	0.0444927	0.0539207	0.0540063	NA,Abhd2	NA
7	79854982	79859982	7	79909964	79914964	.	.	.	.	0,0,0	60	25.4743	27.6386	29.1968	29.9868	14	14	14	14	0.0381449	0.0444927	0.0539207	0.0540063	NA,Anpep	NA,Ap3s2
7	80604999	80609999	7	80696635	80701635	.	.	.	.	0,0,0	68	20.3688	17.8886	22.1945	21.0114	13	12	13	13	0.000624846	2.8171e-06	0.000899735	0.000891467	NA	NA,Crtc3
7	81167494	81172494	7	81212482	81217482	.	.	.	.	0,0,0	50	23.4154	22.3065	26.5883	24.5805	13	13	14	13	0.000624846	0.000684552	0.0539207	0.000891467	NA	NA,Pde8a
7	101549982	101554982	7	101594982	101599982	.	.	.	.	0,0,0	50	28.2891	26.9298	27.0322	26.0259	14	14	14	14	0.0381449	0.0444927	0.0539207	0.0540063	NA,Art2a-ps,Art2a-ps	NA
7	112205000	112210000	7	112355034	112360034	.	.	.	.	0,0,0	66	22.1794	20.983	17.2939	28.3371	13	13	12	14	0.000624846	0.000684552	3.96515e-06	0.0540063	NA	NA,Micalcl
7	142140011	142145011	7	142280011	142285011	.	.	.	.	0,0,0	50	14.4574	10.4767	16.9694	10.878	11	10	12	10	5.53943e-09	2.81e-12	3.96515e-06	4.96663e-12	NA,Gm39115	NA,Krtap5-1,Gm4559
7	143009994	143014994	7	143050000	143055000	.	.	.	.	0,0,0	62	26.8049	24.6552	29.3101	20.5223	14	14	14	13	0.0381449	0.0444927	0.0539207	0.000891467	NA,Tspan32,Tspan32,Tspan32,Tspan32	NA,R74862,R74862,Cd81,R74862
7	44747483	44752483	7	44812527	44817527	.	.	.	.	0,0,0	50	15.7379	20.1713	14.7968	23.7166	12	13	11	13	1.5342e-05	0.0022036	5.00458e-08	0.00286254	NA,Vrk3,Zfp473,Zfp473,Zfp473,Zfp473,Zfp473	NA,Atf5,Atf5,Il4i1b,Nup62
7	63852502	63857502	7	63935000	63940000	.	.	.	.	0,0,0	64	12.6999	12.3165	16.2722	13.1461	11	10	12	11	4.42902e-08	3.60598e-11	2.00658e-05	5.00031e-08	NA	NA,Klf13
7	74487483	74492483	7	74540021	74545021	.	.	.	.	0,0,0	48	22.5347	20.6503	21.4701	21.83	13	13	13	13	0.00199232	0.0022036	0.00288377	0.00286254	NA	NA,Slco3a1,Slco3a1
7	97579977	97584977	7	97667504	97672504	.	.	.	.	0,0,0	48	17.242	16.7565	18.6778	17.8274	12	12	12	12	1.5342e-05	1.46372e-05	2.00658e-05	1.99038e-05	NA,Aamdc,Aamdc,Aamdc,Rsf1,Aamdc	NA
7	98839989	98844989	7	99020000	99025000	.	.	.	.	0,0,0	50	15.7626	17.4909	21.6811	15.0816	12	12	13	11	1.5342e-05	1.46372e-05	0.00288377	5.00031e-08	NA,Wnt11,Wnt11,Wnt11,Wnt11	NA
7	111780000	111785000	7	111935010	111940010	.	.	.	.	0,0,0	50	12.1121	16.1718	23.3167	14.3825	10	12	13	11	5.21164e-11	1.46372e-05	0.00288377	5.00031e-08	NA,Galnt18,Galnt18	NA
7	41595000	41600000	7	41630000	41635000	.	.	.	.	0,0,0	46	21.836	21.2263	17.6446	21.1972	13	13	12	13	0.0057497	0.00644834	9.24471e-05	0.00826849	NA	NA,Zfp788,Zfp788,Zfp788,Zfp788,Zfp788,Zfp788,Zfp788,Zfp788,Zfp788
7	82171235	82176235	7	82236216	82241216	.	.	.	.	0,0,0	56	17.2949	19.6477	19.8024	22.934	12	13	13	13	7.0485e-05	0.00644834	0.00827338	0.00826849	NA,Sh3gl3,Sh3gl3,Sh3gl3	NA
7	139646662	139651662	7	139689980	139694980	.	.	.	.	0,0,0	54	20.7531	19.5716	20.0812	18.8349	13	13	13	12	0.0057497	0.00644834	0.00827338	9.20132e-05	NA	NA,Cfap46
7	3328336	3333336	7	3376662	3381662	.	.	.	.	0,0,0	52	18.104	18.4558	16.6949	19.0745	12	12	12	12	0.000293111	0.000295744	0.000389273	0.000387596	NA,Cacng7	NA,Cacng8
7	73657524	73662524	7	73809186	73814186	.	.	.	.	0,0,0	44	6.43632	5.41802	9.35539	5.63316	8	7	9	7	1.02635e-14	5.64122e-18	1.26888e-11	7.23699e-18	NA	NA,Mir7234,Gm10619,Gm21269
7	80382512	80387512	7	80474987	80479987	.	.	.	.	0,0,0	56	21.4447	19.9454	24.1647	16.2599	13	13	13	12	0.0152065	0.017148	0.0217121	0.000387596	NA,Fes,Man2a2	NA
7	83567498	83572498	7	83799990	83804990	.	.	.	.	0,0,0	44	7.29644	5.92665	9.43089	7.68715	8	7	9	8	1.02635e-14	5.64122e-18	1.26888e-11	1.16001e-14	NA,Tmc3	NA,Cfap161
7	110870018	110875018	7	110917504	110922504	.	.	.	.	0,0,0	60	19.3933	20.6878	23.1667	21.5478	12	13	13	13	0.000293111	0.017148	0.0217121	0.0219071	NA,Lyve1	NA
7	127919981	127924981	7	127965000	127970000	.	.	.	.	0,0,0	44	22.5024	21.1457	23.8472	19.3716	13	13	13	12	0.0152065	0.017148	0.0217121	0.000387596	NA,Kat8,Prss8,Kat8	NA,Fus,Fus
7	133652495	133657495	7	133715009	133720009	.	.	.	.	0,0,0	46	17.1658	16.4055	18.8509	17.0133	12	12	12	12	0.000293111	0.000295744	0.000389273	0.000387596	NA	NA,Uros,Uros,Uros,Uros,Bccip,Uros,Uros
7	134224996	134229996	7	134347495	134352495	.	.	.	.	0,0,0	44	12.302	11.3621	10.038	12.819	10	10	10	11	6.12642e-09	4.50454e-09	7.20291e-09	2.40808e-06	NA,Adam12	NA,D7Ertd443e
7	30010014	30015014	7	30055005	30060005	.	.	.	.	0,0,0	56	18.172	20.3596	20.8896	16.5838	12	13	13	12	0.00109074	0.0411484	0.0516631	0.00144164	NA	NA,Zfp14,Zfp14,Zfp14
7	30665031	30670031	7	30755008	30760008	.	.	.	.	0,0,0	42	13.2434	14.8155	21.6933	14.792	11	11	13	11	1.24015e-05	1.04956e-05	0.0516631	1.43615e-05	NA,Pmis2,Haus5,Pmis2	NA,Gapdhs,Dmkn,Dmkn,Dmkn,Sbsn,Sbsn
7	45070000	45075000	7	45105000	45110000	.	.	.	.	0,0,0	50	16.4761	21.2407	17.3164	20.6194	12	13	12	13	0.00109074	0.0411484	0.00146086	0.0521681	NA,Prrg2,Nosip,Nosip	NA,Fcgrt,Fcgrt,Mir150
7	46655017	46660017	7	46700000	46705000	.	.	.	.	0,0,0	62	23.8192	23.1283	22.2593	19.3871	13	13	13	12	0.0365944	0.0411484	0.0516631	0.00144164	NA,Tph1,Tph1	NA,Saa3,Saal1
7	79811641	79816641	7	79895023	79900023	.	.	.	.	0,0,0	164	15.0216	18.1815	17.851	23.5948	11	12	12	13	1.24015e-05	0.00113134	0.00146086	0.0521681	NA,Mesp2	NA
7	100260025	100265025	7	100334984	100339984	.	.	.	.	0,0,0	152	19.6535	18.8361	17.3847	14.7851	13	12	12	11	0.0365944	0.00113134	0.00146086	1.43615e-05	NA,Gpx2-ps1	NA
7	105472504	105477504	7	105522482	105527482	.	.	.	.	0,0,0	52	21.8656	21.2624	17.3012	17.2544	13	13	12	12	0.0365944	0.0411484	0.00146086	0.00144164	NA,Cavin3	NA
7	110212509	110217509	7	110274977	110279977	.	.	.	.	0,0,0	100	24.3391	22.9008	20.8692	16.9403	13	13	13	12	0.0365944	0.0411484	0.0516631	0.00144164	NA,Swap70	NA
7	112115000	112120000	7	112155021	112160021	.	.	.	.	0,0,0	52	19.0056	20.3648	21.0046	19.8474	12	13	13	13	0.00109074	0.0411484	0.0516631	0.0521681	NA	NA,Dkk3,Dkk3,Dkk3,Dkk3
7	120982504	120987504	7	121025008	121030008	.	.	.	.	0,0,0	58	19.7854	22.8132	21.7068	21.3439	13	13	13	13	0.0365944	0.0411484	0.0516631	0.0521681	NA,Mfsd13b,Cdr2,Cdr2	NA,Mettl9
7	126399993	126404993	7	126505032	126510032	.	.	.	.	0,0,0	98	19.9027	18.0023	24.2887	15.771	13	12	13	12	0.0365944	0.00113134	0.0516631	0.00144164	NA,Cd19,Nfatc2ip,Cd19	NA,Atxn2l,Atxn2l,Atxn2l
7	126700000	126705000	7	126750000	126755000	.	.	.	.	0,0,0	42	21.9062	18.2507	17.7213	19.7472	13	12	12	13	0.0365944	0.00113134	0.00146086	0.0521681	NA,Bola2,Slx1b,Coro1a,Slx1b,Coro1a	NA,Mapk3,Gdpd3
7	126799987	126804987	7	127015008	127020008	.	.	.	.	0,0,0	42	15.4701	12.744	13.1876	13.5457	11	11	11	11	1.24015e-05	1.04956e-05	1.4655e-05	1.43615e-05	NA,Aldoa,Aldoa,Aldoa,Fam57b,Ppp4c,Ppp4c	NA,Mvp,Maz,Pagr1a,Prrt2
7	126814991	126819991	7	126864991	126869991	.	.	.	.	0,0,0	42	22.5389	22.4942	20.3498	20.3829	13	13	13	13	0.0365944	0.0411484	0.0516631	0.0521681	NA,Fam57b,4930451I11Rik,Fam57b,Fam57b	NA,Hirip3,Ino80e
7	127265016	127270016	7	127320000	127325000	.	.	.	.	0,0,0	42	18.1661	17.6956	16.4556	15.9998	12	12	12	12	0.00109074	0.00113134	0.00146086	0.00144164	NA,Dctpp1,Sephs2	NA
7	128438325	128443325	7	128698327	128703327	.	.	.	.	0,0,0	50	17.7675	15.1864	15.9904	22.2079	12	11	12	13	0.00109074	1.04956e-05	0.00146086	0.0521681	NA	NA,Inpp5f
7	140905008	140910008	7	140954983	140959983	.	.	.	.	0,0,0	46	19.6707	19.2717	19.4753	16.1238	13	12	12	12	0.0365944	0.00113134	0.00146086	0.00144164	NA,BC024386,Cox8b,Nlrp6	NA,Ifitm1,Ifitm1,Ifitm2,Ifitm1,Ifitm1,Ifitm5
7	141329991	141334991	7	141395000	141400000	.	.	.	.	0,0,0	52	19.3999	19.7637	21.8275	23.3695	12	13	13	13	0.00109074	0.0411484	0.0516631	0.0521681	NA,Eps8l2,Deaf1,Deaf1,Tmem80,Deaf1,Tmem80,Deaf1,Tmem80	NA,Taldo1
7	141527512	141532512	7	141662498	141667498	.	.	.	.	0,0,0	56	13.7774	13.8513	10.2852	19.3642	11	11	10	12	1.24015e-05	1.04956e-05	6.6567e-08	0.00144164	NA,Chid1,Chid1	NA,Muc6
7	18905016	18910016	7	18952512	18957512	.	.	.	.	0,0,0	52	13.5478	13.9921	15.829	11.947	11	11	12	10	6.52467e-05	5.79125e-05	0.0048989	5.83388e-07	NA,Ccdc61	NA
7	27647504	27652504	7	27726251	27731251	.	.	.	.	0,0,0	40	8.71606	9.25388	11.6188	14.3434	9	9	10	11	2.05822e-09	1.51739e-09	5.593e-07	7.78082e-05	NA,Ttc9b	NA,Zfp60,Zfp60
7	43599969	43604969	7	43665008	43670008	.	.	.	.	0,0,0	72	14.8737	14.2522	14.7376	17.9711	11	11	11	12	6.52467e-05	5.79125e-05	7.84691e-05	0.0048709	NA,Zfp819,Zfp819	NA,Ctu1,Siglece
7	82120007	82125007	7	82180000	82185000	.	.	.	.	0,0,0	40	18.0575	16.299	15.7643	16.0649	12	12	12	12	0.00368742	0.00388347	0.0048989	0.0048709	NA	NA,Sh3gl3,Sh3gl3,Sh3gl3
7	100184984	100189984	7	100259992	100264992	.	.	.	.	0,0,0	42	14.1838	13.3135	19.5421	10.4154	11	11	12	10	6.52467e-05	5.79125e-05	0.0048989	5.83388e-07	NA,Kcne3,Kcne3,Kcne3,Kcne3,Kcne3,Kcne3,Kcne3	NA,Gpx2-ps1
7	102824980	102829980	7	102860000	102865000	.	.	.	.	0,0,0	44	6.49741	11.894	3.27086	15.7833	8	10	5	12	5.12414e-12	3.88536e-07	4.51002e-21	0.0048709	NA	NA,Olfr566,Olfr568
7	106694992	106699992	7	106760007	106765007	.	.	.	.	0,0,0	40	18.3923	17.8574	19.4181	19.3481	12	12	12	12	0.00368742	0.00388347	0.0048989	0.0048709	NA,Olfr694	NA,Olfr698
7	109082519	109087519	7	109127511	109132511	.	.	.	.	0,0,0	52	18.2474	16.2028	16.5949	14.5914	12	12	12	11	0.00368742	0.00388347	0.0048989	7.78082e-05	NA,Ric3,Ric3,Ric3	NA
7	127795003	127800003	7	127875003	127880003	.	.	.	.	0,0,0	48	12.5633	13.0869	15.2447	13.1947	11	11	11	11	6.52467e-05	5.79125e-05	7.84691e-05	7.78082e-05	NA,Hsd3b7,Hsd3b7	NA,Zfp646,Prss53,Zfp668,Zfp668,Zfp668,Zfp668,Zfp668
7	143944992	143949992	7	144000000	144005000	.	.	.	.	0,0,0	40	14.3704	15.9562	17.2329	14.2736	11	12	12	11	6.52467e-05	0.00388347	0.0048989	7.78082e-05	NA,Mir6404	NA,Mir3105
7	19668330	19673330	7	19785002	19790002	.	.	.	.	0,0,0	38	10.913	8.27355	12.6364	10.506	10	9	11	10	3.68718e-06	1.83545e-08	0.00037403	4.3412e-06	NA,Gm44805,Apoc2,Apoc2,Clptm1,Apoc4	NA,Cblc,Cblc
7	25755007	25760007	7	25854992	25859992	.	.	.	.	0,0,0	38	17.2597	13.4796	18.5036	14.412	12	11	12	11	0.0111176	0.000287016	0.0147779	0.00037049	NA,Hnrnpul1,Hnrnpul1,Hnrnpul1	NA
7	33929977	33934977	7	33965014	33970014	.	.	.	.	0,0,0	38	16.2162	16.3707	17.5832	15.9683	12	12	12	12	0.0111176	0.0119182	0.0147779	0.0147251	NA,Scgb2b26	NA
7	34135019	34140019	7	34200012	34205012	.	.	.	.	0,0,0	58	9.25808	9.83966	11.5787	12.8914	9	9	10	11	2.44826e-08	1.83545e-08	4.27537e-06	0.00037049	NA,Wtip	NA,Pdcd2l,Pdcd2l
7	65860022	65865022	7	66034985	66039985	.	.	.	.	0,0,0	38	11.6042	10.8643	11.9604	11.0135	10	10	10	10	3.68718e-06	3.05739e-06	4.27537e-06	4.3412e-06	NA,Pcsk6,Pcsk6	NA
7	67370000	67375000	7	67544996	67549996	.	.	.	.	0,0,0	44	14.3839	14.9647	17.6919	16.1998	11	11	12	12	0.000309348	0.000287016	0.0147779	0.0147251	NA,Mef2a,Mef2a,Mef2a,Mef2a,Mef2a,Mef2a,Mef2a	NA
7	81450003	81455003	7	81490021	81495021	.	.	.	.	0,0,0	44	14.6726	16.6401	13.9656	16.4361	11	12	11	12	0.000309348	0.0119182	0.00037403	0.0147251	NA,Cpeb1,Cpeb1,Cpeb1	NA,Ap3b2,BC048679,BC048679,BC048679
7	89475020	89480020	7	89890016	89895016	.	.	.	.	0,0,0	42	16.9354	12.6361	18.0949	13.5748	12	11	12	11	0.0111176	0.000287016	0.0147779	0.00037049	NA	NA,Ccdc81
7	100119992	100124992	7	100234992	100239992	.	.	.	.	0,0,0	38	12.5891	11.3392	15.9188	10.4299	11	10	12	10	0.000309348	3.05739e-06	0.0147779	4.3412e-06	NA,Pold3	NA,Pgm2l1
7	109170007	109175007	7	109214992	109219992	.	.	.	.	0,0,0	44	15.3576	15.9219	17.9198	19.4782	11	12	12	12	0.000309348	0.0119182	0.0147779	0.0147251	NA,Lmo1,Lmo1,Lmo1	NA
7	109624992	109629992	7	109669985	109674985	.	.	.	.	0,0,0	42	15.3891	16.3384	14.1588	17.1888	11	12	11	12	0.000309348	0.0119182	0.00037403	0.0147251	NA,St5,St5,St5	NA
7	127605014	127610014	7	127650000	127655000	.	.	.	.	0,0,0	38	14.7465	14.9783	15.3707	17.7085	11	11	11	12	0.000309348	0.000287016	0.00037403	0.0147251	NA,1700120K04Rik,Zfp629,Zfp629,Zfp629,Zfp629,Zfp629,Zfp629	NA
7	128099992	128104992	7	128205000	128210000	.	.	.	.	0,0,0	46	14.0697	13.926	14.0212	17.6192	11	11	11	12	0.000309348	0.000287016	0.00037403	0.0147251	NA	NA,Cox6a2,4931431B13Rik
7	143225007	143230007	7	143461670	143466670	.	.	.	.	0,0,0	42	17.5004	13.9595	10.4193	18.2921	12	11	10	12	0.0111176	0.000287016	4.27537e-06	0.0147251	NA	NA,Cdkn1c,Cdkn1c,Slc22a18,Cdkn1c,Slc22a18
7	6285000	6290000	7	6324999	6329999	.	.	.	.	0,0,0	36	16.9292	15.173	17.6859	15.7057	12	11	12	12	0.0296973	0.00125832	0.0390663	0.0392094	NA,Zfp667	NA,Zfp583
7	19430000	19435000	7	19605000	19610000	.	.	.	.	0,0,0	44	18.0206	18.779	18.7037	19.3953	12	12	12	12	0.0296973	0.0322078	0.0390663	0.0392094	NA,A930016O22Rik,A930016O22Rik	NA,Clasrp,Clasrp,Clasrp,Clasrp,Clasrp,Clasrp
7	24315000	24320000	7	24400003	24405003	.	.	.	.	0,0,0	44	14.0419	14.8266	16.6149	16.6732	11	11	12	12	0.00129874	0.00125832	0.0390663	0.0392094	NA,Zfp94,Zfp94	NA,Smg9
7	25302505	25307505	7	25387506	25392506	.	.	.	.	0,0,0	46	18.5445	15.0477	14.939	18.865	12	11	11	12	0.0296973	0.00125832	0.00157772	0.0392094	NA,Pafah1b3,Megf8,Tmem145,Prr19,Pafah1b3	NA,4732471J01Rik,Lipe,4732471J01Rik,4732471J01Rik,Lipe
7	30235000	30240000	7	30270017	30275017	.	.	.	.	0,0,0	58	18.7895	15.8787	19.0552	16.7145	12	12	12	12	0.0296973	0.0322078	0.0390663	0.0392094	NA,Tbcb,Polr2i,Ovol3,Tbcb,Tbcb	NA,Wdr62,LOC108167416,Wdr62
7	30775013	30780013	7	30847520	30852520	.	.	.	.	0,0,0	44	14.2598	15.5981	17.2191	18.0009	11	12	12	12	0.00129874	0.0322078	0.0390663	0.0392094	NA,Dmkn,Dmkn,Dmkn,Dmkn,Krtdap,Krtdap,Krtdap,Krtdap	NA,Ffar1,Ffar3
7	35757503	35762503	7	35857503	35862503	.	.	.	.	0,0,0	36	11.8335	10.5562	11.3827	12.5112	10	10	10	11	2.46826e-05	2.10581e-05	2.8219e-05	0.00154596	NA,Dpy19l3	NA
7	49849986	49854986	7	49910003	49915003	.	.	.	.	0,0,0	50	16.4636	15.7673	17.807	18.866	12	12	12	12	0.0296973	0.0322078	0.0390663	0.0392094	NA	NA,Slc6a5,Slc6a5
7	75215020	75220020	7	75315006	75320006	.	.	.	.	0,0,0	36	12.3378	14.0583	13.8813	14.5123	10	11	11	11	2.46826e-05	0.00125832	0.00157772	0.00154596	NA,Sv2b	NA,Sv2b,1500012K07Rik,Sv2b,1500012K07Rik,Sv2b,Sv2b,Sv2b,Sv2b
7	79800013	79805013	7	79850013	79855013	.	.	.	.	0,0,0	38	16.0638	17.0405	19.5394	18.9733	12	12	12	12	0.0296973	0.0322078	0.0390663	0.0392094	NA,Mesp2,Mesp1	NA,Anpep
7	80890009	80895009	7	81043348	81048348	.	.	.	.	0,0,0	52	12.2429	12.094	14.8408	13.0501	10	10	11	11	2.46826e-05	2.10581e-05	0.00157772	0.00154596	NA,Wdr73,Nmb,Wdr73,Nmb,Wdr73,Wdr73	NA,Alpk3
7	81062498	81067498	7	81142505	81147505	.	.	.	.	0,0,0	52	16.1471	14.6496	14.4675	19.0733	12	11	11	12	0.0296973	0.00125832	0.00157772	0.0392094	NA,Alpk3	NA
7	89369988	89374988	7	89409993	89414993	.	.	.	.	0,0,0	58	14.6926	16.3356	10.7676	16.4885	11	12	10	12	0.00129874	0.0322078	2.8219e-05	0.0392094	NA	NA,Fzd4,AI314278,Tmem135
7	89520000	89525000	7	89830000	89835000	.	.	.	.	0,0,0	36	8.86911	12.8105	14.2848	17.8177	9	11	11	12	2.50448e-07	0.00125832	0.00157772	0.0392094	NA,Prss23,Prss23,Prss23,Prss23,Prss23,Prss23	NA
7	118140013	118145013	7	118295000	118300000	.	.	.	.	0,0,0	36	8.90587	7.23677	9.92662	14.3424	9	8	10	11	2.50448e-07	1.21119e-09	2.8219e-05	0.00154596	NA,Arl6ip1	NA
7	123329993	123334993	7	123374996	123379996	.	.	.	.	0,0,0	52	15.9394	16.1671	14.1121	13.7357	12	12	11	11	0.0296973	0.0322078	0.00157772	0.00154596	NA	NA,Arhgap17,Arhgap17,Arhgap17,Arhgap17,Arhgap17,Lcmt1,Arhgap17
7	132669981	132674981	7	132819982	132824982	.	.	.	.	0,0,0	58	14.9431	15.7973	17.544	13.4959	11	12	12	11	0.00129874	0.0322078	0.0390663	0.00154596	NA	NA,Fam53b
7	12839993	12844993	7	12889983	12894983	.	.	.	.	0,0,0	50	16.7378	15.7758	16.8383	15.8551	12	12	12	12	0.0708272	0.0770009	0.0921578	0.0928797	NA,Zfp110,Zfp110	NA,Zfp128,Zscan22,Zscan22,Zscan22,Zscan22,Zscan22,Zscan22
7	16175017	16180017	7	16245016	16250016	.	.	.	.	0,0,0	100	15.7802	17.7943	17.0697	18.5169	12	12	12	12	0.0708272	0.0770009	0.0921578	0.0928797	NA,Meis3,Meis3,Meis3,Meis3,Meis3	NA,C5ar1,C5ar2,C5ar1,C5ar2
7	18710000	18715000	7	18870000	18875000	.	.	.	.	0,0,0	34	8.47321	6.45951	4.80557	12.3232	9	8	6	10	2.34136e-06	1.83788e-08	5.84126e-13	0.000169372	NA,Psg22	NA,Pglyrp1
7	19176641	19181641	7	19341667	19346667	.	.	.	.	0,0,0	38	12.1426	12.8865	13.9424	13.2422	10	11	11	11	0.000143123	0.00477465	0.0057994	0.00569329	NA,Eml2,Mir330,Eml2,Eml2,Gipr	NA,Ercc1,Ercc1
7	28169993	28174993	7	28309980	28314980	.	.	.	.	0,0,0	44	15.5625	16.1573	17.6534	16.2242	12	12	12	12	0.0708272	0.0770009	0.0921578	0.0928797	NA,Dyrk1b,Fbl,Dyrk1b,Dyrk1b	NA,Timm50,Dll3
7	28214987	28219987	7	28299996	28304996	.	.	.	.	0,0,0	48	13.2351	14.8068	13.0267	16.6152	11	11	11	12	0.00477156	0.00477465	0.0057994	0.0928797	NA	NA,Timm50,Dll3,Selenov
7	35654993	35659993	7	35700018	35705018	.	.	.	.	0,0,0	44	14.4338	14.7293	13.8084	13.5435	11	11	11	11	0.00477156	0.00477465	0.0057994	0.00569329	NA,Pdcd5	NA
7	39450000	39455000	7	39499981	39504981	.	.	.	.	0,0,0	36	16.869	15.393	17.5328	10.0808	12	11	12	10	0.0708272	0.00477465	0.0921578	0.000169372	NA,Zfp939,Zfp939	NA
7	48967490	48972490	7	49072490	49077490	.	.	.	.	0,0,0	50	11.7151	17.97	18.9773	16.6438	10	12	12	12	0.000143123	0.0770009	0.0921578	0.0928797	NA,Nav2	NA
7	67225000	67230000	7	67549977	67554977	.	.	.	.	0,0,0	34	15.6964	12.3787	14.6502	12.6449	12	10	11	11	0.0708272	0.000128458	0.0057994	0.00569329	NA,1700112J16Rik,Lysmd4,1700112J16Rik,Lysmd4,Lysmd4,Lysmd4,Lysmd4	NA
7	73940003	73945003	7	74009996	74014996	.	.	.	.	0,0,0	46	18.2024	17.5676	15.4697	19.3355	12	12	11	12	0.0708272	0.0770009	0.0057994	0.0928797	NA	NA,St8sia2
7	79270004	79275004	7	79334977	79339977	.	.	.	.	0,0,0	76	11.6027	13.5626	13.9713	16.2129	10	11	11	12	0.000143123	0.00477465	0.0057994	0.0928797	NA,Abhd2	NA
7	80205006	80210006	7	80285012	80290012	.	.	.	.	0,0,0	38	17.6185	17.4193	15.8498	19.2158	12	12	12	12	0.0708272	0.0770009	0.0921578	0.0928797	NA,Sema4b	NA,Prc1,Prc1,Prc1
7	82170014	82175014	7	82264981	82269981	.	.	.	.	0,0,0	56	15.7877	14.8373	18.5432	18.7061	12	11	12	12	0.0708272	0.00477465	0.0921578	0.0928797	NA,Sh3gl3,Sh3gl3,Sh3gl3	NA
7	83580000	83585000	7	83622496	83627496	.	.	.	.	0,0,0	34	18.1275	19.1758	15.9959	18.3188	12	12	12	12	0.0708272	0.0770009	0.0921578	0.0928797	NA,Tmc3	NA,Stard5
7	89300000	89305000	7	89335003	89340003	.	.	.	.	0,0,0	52	16.6574	18.0679	17.5909	17.1054	12	12	12	12	0.0708272	0.0770009	0.0921578	0.0928797	NA	NA,Tmem135,Tmem135
7	90300000	90305000	7	90359987	90364987	.	.	.	.	0,0,0	34	13.1979	14.5005	17.3324	13.1304	11	11	12	11	0.00477156	0.00477465	0.0921578	0.00569329	NA,Sytl2,Sytl2,Sytl2,Sytl2,Sytl2	NA
7	92125000	92130000	7	92165000	92170000	.	.	.	.	0,0,0	38	13.6144	14.2026	14.4095	15.3306	11	11	11	11	0.00477156	0.00477465	0.0057994	0.00569329	NA,4930567K12Rik	NA
7	92320009	92325009	7	92545000	92550000	.	.	.	.	0,0,0	34	9.25192	8.55271	11.7586	8.70167	9	9	10	9	2.34136e-06	1.92897e-06	0.000166057	2.78294e-06	NA	NA,Ccdc90b,Ccdc90b
7	98495017	98500017	7	98550005	98555005	.	.	.	.	0,0,0	58	15.7705	16.9142	19.2583	18.0465	12	12	12	12	0.0708272	0.0770009	0.0921578	0.0928797	NA,Lrrc32	NA
7	98685011	98690011	7	98835000	98840000	.	.	.	.	0,0,0	50	15.8355	13.5299	13.7676	16.374	12	11	11	12	0.0708272	0.00477465	0.0057994	0.0928797	NA	NA,Wnt11,Wnt11,Wnt11,Wnt11
7	99175008	99180008	7	99247500	99252500	.	.	.	.	0,0,0	52	17.7835	18.3973	19.4568	18.877	12	12	12	12	0.0708272	0.0770009	0.0921578	0.0928797	NA,Dgat2	NA,Mogat2
7	99484994	99489994	7	99535005	99540005	.	.	.	.	0,0,0	50	18.7436	19.2114	18.6602	18.4358	12	12	12	12	0.0708272	0.0770009	0.0921578	0.0928797	NA,Rps3,Snord15b,Snord15a	NA,Arrb1,Arrb1,Mir326
7	99679994	99684994	7	99740011	99745011	.	.	.	.	0,0,0	38	12.2845	15.5481	13.846	15.7037	10	11	11	12	0.000143123	0.00477465	0.0057994	0.0928797	NA,Slco2b1	NA,Olfr520
7	101794994	101799994	7	101875005	101880005	.	.	.	.	0,0,0	34	10.5922	11.3257	12.2968	13.5188	10	10	10	11	0.000143123	0.000128458	0.000166057	0.00569329	NA	NA,Anapc15,Anapc15,Folr1,Folr1,Folr1,Folr1
7	109979982	109984982	7	110089988	110094988	.	.	.	.	0,0,0	48	12.735	13.404	17.5008	11.4725	11	11	12	10	0.00477156	0.00477465	0.0921578	0.000169372	NA,Tmem41b	NA
7	118925017	118930017	7	118994994	118999994	.	.	.	.	0,0,0	50	17.1555	17.2114	17.8732	18.7635	12	12	12	12	0.0708272	0.0770009	0.0921578	0.0928797	NA	NA,Gprc5b,Gprc5b
7	122605011	122610011	7	122664982	122669982	.	.	.	.	0,0,0	34	18.7697	18.4788	14.0639	16.5096	12	12	11	12	0.0708272	0.0770009	0.0057994	0.0928797	NA	NA,Cacng3
7	123204997	123209997	7	123399994	123404994	.	.	.	.	0,0,0	38	8.61154	9.31848	12.5029	8.9553	9	9	11	9	2.34136e-06	1.92897e-06	0.0057994	2.78294e-06	NA,Slc5a11	NA,Lcmt1
7	123222485	123227485	7	123290000	123295000	.	.	.	.	0,0,0	52	14.7765	15.986	17.2623	17.2813	11	12	12	12	0.00477156	0.0770009	0.0921578	0.0928797	NA,Slc5a11	NA
7	127044982	127049982	7	127165011	127170011	.	.	.	.	0,0,0	34	11.5929	10.1486	11.6471	10.6026	10	10	10	10	0.000143123	0.000128458	0.000166057	0.000169372	NA,Kif22,Zg16	NA
7	131110000	131115000	7	131177497	131182497	.	.	.	.	0,0,0	36	12.7102	13.5725	15.5204	11.2829	11	11	11	10	0.00477156	0.00477465	0.0057994	0.000169372	NA	NA,5430419D17Rik
7	132090000	132095000	7	132139994	132144994	.	.	.	.	0,0,0	52	16.8698	17.6046	16.5016	17.9372	12	12	12	12	0.0708272	0.0770009	0.0921578	0.0928797	NA	NA,Cpxm2
7	143285005	143290005	7	143360005	143365005	.	.	.	.	0,0,0	34	17.9908	18.5617	17.2448	18.6624	12	12	12	12	0.0708272	0.0770009	0.0921578	0.0928797	NA,Kcnq1ot1	NA
7	143790003	143795003	7	143895009	143900009	.	.	.	.	0,0,0	48	12.2522	13.3736	13.8335	17.8523	10	11	11	12	0.000143123	0.00477465	0.0057994	0.0928797	NA,Mrgpre	NA
7	18895000	18900000	7	19025005	19030005	.	.	.	.	0,0,0	32	10.3161	7.10977	13.604	4.69801	10	8	11	6	0.000722858	2.45511e-07	0.0185848	1.68299e-11	NA,Pglyrp1,Ccdc61	NA,Sympk,Foxa3,Sympk
7	39450000	39455000	7	39544994	39549994	.	.	.	.	0,0,0	36	9.04432	8.68571	9.31483	8.92269	9	9	9	9	1.87223e-05	1.6278e-05	2.17487e-05	2.22427e-05	NA,Zfp939,Zfp939	NA
7	49969983	49974983	7	50354991	50359991	.	.	.	.	0,0,0	42	7.64706	7.01289	8.11625	6.57692	8	8	9	8	2.87141e-07	2.45511e-07	2.17487e-05	3.36413e-07	NA,Nell1	NA
7	66735011	66740011	7	66780011	66785011	.	.	.	.	0,0,0	34	10.2324	11.0765	10.1874	14.9912	10	10	10	11	0.000722858	0.000680464	0.000834431	0.0183317	NA,Cers3	NA
7	73195005	73200005	7	73367508	73372508	.	.	.	.	0,0,0	32	9.75671	11.1649	11.5823	11.6599	9	10	10	10	1.87223e-05	0.000680464	0.000834431	0.000852571	NA	NA,A730056A06Rik,A730056A06Rik,Rgma
7	78915000	78920000	7	79350000	79355000	.	.	.	.	0,0,0	32	6.91478	5.45763	6.81452	6.29292	8	7	8	8	2.87141e-07	2.46978e-09	3.46143e-07	3.36413e-07	NA,Isg20,Isg20,Isg20,Isg20	NA
7	85910005	85915005	7	85950000	85955000	.	.	.	.	0,0,0	36	10.4601	8.50116	2.93248	14.6175	10	9	4	11	0.000722858	1.6278e-05	1.62523e-16	0.0183317	NA	NA,Vmn2r74
7	99595013	99600013	7	99710008	99715008	.	.	.	.	0,0,0	52	11.9562	10.9992	13.3295	15.4604	10	10	11	11	0.000722858	0.000680464	0.0185848	0.0183317	NA	NA,Slco2b1,Slco2b1
7	100290000	100295000	7	100405005	100410005	.	.	.	.	0,0,0	58	12.4711	14.1251	12.8529	12.703	11	11	11	11	0.0152617	0.0157429	0.0185848	0.0183317	NA,P4ha3	NA
7	101104999	101109999	7	101294989	101299989	.	.	.	.	0,0,0	34	13.9985	14.97	14.1789	13.4997	11	11	11	11	0.0152617	0.0157429	0.0185848	0.0183317	NA,Fchsd2,Fchsd2	NA,Atg16l2,Atg16l2
7	101668329	101673329	7	101900000	101905000	.	.	.	.	0,0,0	34	13.5497	10.1905	14.5008	10.4894	11	10	11	10	0.0152617	0.000680464	0.0185848	0.000852571	NA,Clpb,Clpb	NA,Lamtor1,Anapc15,Anapc15,Tomt,Tomt,Anapc15
7	120095016	120100016	7	120324997	120329997	.	.	.	.	0,0,0	64	7.13683	7.31756	9.05248	14.2448	8	8	9	11	2.87141e-07	2.45511e-07	2.17487e-05	0.0183317	NA,Tmem159	NA,Abca15
7	130159999	130164999	7	130260000	130265000	.	.	.	.	0,0,0	32	13.6653	10.8039	9.2576	13.9319	11	10	9	11	0.0152617	0.000680464	2.17487e-05	0.0183317	NA	NA,Fgfr2,Fgfr2,Fgfr2
7	130605001	130610001	7	130757497	130762497	.	.	.	.	0,0,0	34	11.0931	9.35337	9.99335	10.4036	10	9	10	10	0.000722858	1.6278e-05	0.000834431	0.000852571	NA	NA,Btbd16
7	140709994	140714994	7	140760010	140765010	.	.	.	.	0,0,0	34	14.0675	14.7528	12.4136	15.1544	11	11	11	11	0.0152617	0.0157429	0.0185848	0.0183317	NA,Olfr541	NA,Cyp2e1
7	3459989	3464989	7	3505000	3510000	.	.	.	.	0,0,0	32	11.8551	9.5294	8.28903	12.2829	10	9	9	10	0.00312435	0.000118048	0.000145272	0.00366917	NA	NA,Tarm1,Tarm1
7	4138746	4143746	7	4518755	4523755	.	.	.	.	0,0,0	30	8.81352	6.7546	12.1562	7.44517	9	8	10	8	0.000128464	2.79224e-06	0.00361511	3.67606e-06	NA,Leng9,Leng8,D030047H15Rik	NA,Tnni3,Tnnt1,Tnnt1,Tnnt1,Tnnt1,Dnaaf3
7	4812502	4817502	7	4872513	4877513	.	.	.	.	0,0,0	30	14.2027	11.8447	13.9004	11.0929	11	10	11	10	0.0422094	0.00306124	0.0513002	0.00366917	NA,Ube2s	NA,Isoc2b,Isoc2a
7	28275000	28280000	7	28340005	28345005	.	.	.	.	0,0,0	38	11.7926	10.4291	14.3128	11.6303	10	10	11	10	0.00312435	0.00306124	0.0513002	0.00366917	NA,Eid2,Selenov,Eid2b	NA,Supt5,Rps16,AF357399
7	40380013	40385013	7	40895002	40900002	.	.	.	.	0,0,0	30	6.23588	7.03857	4.76799	7.92027	8	8	6	9	3.13776e-06	2.79224e-06	4.9674e-10	0.000148993	NA	NA,A230077H06Rik,Vstm2b
7	64062507	64067507	7	64139994	64144994	.	.	.	.	0,0,0	30	9.1849	8.70683	8.03066	11.5036	9	9	9	10	0.000128464	0.000118048	0.000145272	0.00366917	NA	NA,Trpm1
7	65865000	65870000	7	66014984	66019984	.	.	.	.	0,0,0	30	10.8536	13.6896	14.5781	13.5207	10	11	11	11	0.00312435	0.044602	0.0513002	0.0509858	NA,Pcsk6,Pcsk6	NA
7	68224989	68229989	7	68285010	68290010	.	.	.	.	0,0,0	44	10.7394	13.2483	14.6469	12.0362	10	11	11	10	0.00312435	0.044602	0.0513002	0.00366917	NA	NA,Gm16157,Gm16157,Fam169b
7	79559994	79564994	7	79645000	79650000	.	.	.	.	0,0,0	50	12.0691	12.9846	13.3022	15.4534	10	11	11	11	0.00312435	0.044602	0.0513002	0.0509858	NA	NA,Ticrr
7	92645010	92650010	7	92734998	92739998	.	.	.	.	0,0,0	46	12.0604	12.4364	9.74503	13.8383	10	11	9	11	0.00312435	0.044602	0.000145272	0.0509858	NA,Ankrd42	NA,Rab30,4632427E13Rik
7	100294984	100299984	7	100365005	100370005	.	.	.	.	0,0,0	58	10.1988	12.0503	10.3854	11.8501	10	10	10	10	0.00312435	0.00306124	0.00361511	0.00366917	NA,P4ha3	NA,C2cd3,Ppme1
7	100705000	100710000	7	100794994	100799994	.	.	.	.	0,0,0	34	9.79821	11.5771	10.83	13.2872	9	10	10	11	0.000128464	0.00306124	0.00361511	0.0509858	NA,Fam168a,Fam168a,Fam168a	NA
7	105630000	105635000	7	105785015	105790015	.	.	.	.	0,0,0	30	9.10297	11.4512	13.5994	7.81715	9	10	11	8	0.000128464	0.00306124	0.0513002	3.67606e-06	NA,Trim3,Trim3,Arfip2,Trim3,Trim3,Timm10b,Timm10b,Timm10b,Timm10b,Timm10b,Timm10b,Timm10b,Timm10b,Timm10b,Timm10b,Timm10b,Timm10b,Trim3	NA,Dchs1
7	107206669	107211669	7	107783339	107788339	.	.	.	.	0,0,0	30	10.9916	8.86617	10.7405	9.7469	10	9	10	9	0.00312435	0.000118048	0.00361511	0.000148993	NA,Rbmxl2	NA
7	107360000	107365000	7	107514994	107519994	.	.	.	.	0,0,0	34	12.6773	12.5359	12.7712	15.4679	11	11	11	11	0.0422094	0.044602	0.0513002	0.0509858	NA,Syt9	NA
7	119184994	119189994	7	119420009	119425009	.	.	.	.	0,0,0	36	8.55	8.78212	13.0221	10.4338	9	9	11	10	0.000128464	0.000118048	0.0513002	0.00366917	NA,Gpr139	NA
7	120729995	120734995	7	120810009	120815009	.	.	.	.	0,0,0	46	9.82682	10.005	8.43681	13.5717	9	10	9	11	0.000128464	0.00306124	0.000145272	0.0509858	NA,Vwa3a	NA
7	123010004	123015004	7	123385000	123390000	.	.	.	.	0,0,0	30	6.44828	7.02693	8.36187	7.72236	8	8	9	8	3.13776e-06	2.79224e-06	0.000145272	3.67606e-06	NA	NA,Lcmt1
7	129940014	129945014	7	130269992	130274992	.	.	.	.	0,0,0	30	8.11239	7.42409	7.74303	10.4205	9	8	8	10	0.000128464	2.79224e-06	3.66851e-06	0.00366917	NA	NA,Fgfr2,Fgfr2,Fgfr2
7	130784985	130789985	7	130980000	130985000	.	.	.	.	0,0,0	30	12.707	12.522	14.8891	10.6279	11	11	11	10	0.0422094	0.044602	0.0513002	0.00366917	NA,Btbd16	NA
7	139715000	139720000	7	139780014	139785014	.	.	.	.	0,0,0	32	11.3622	12.1564	14.4981	13.315	10	10	11	11	0.00312435	0.00306124	0.0513002	0.0509858	NA	NA,Mir6401
7	141514985	141519985	7	141604995	141609995	.	.	.	.	0,0,0	34	11.3314	12.1928	10.8298	12.1212	10	10	10	10	0.00312435	0.00306124	0.00361511	0.00366917	NA	NA,Gm16982,Mir7063
7	142190000	142195000	7	142240004	142245004	.	.	.	.	0,0,0	34	7.21212	9.73504	11.7335	13.7382	8	9	10	11	3.13776e-06	0.000118048	0.00361511	0.0509858	NA,Krtap5-3	NA,Krtap5-5
7	143299990	143304990	7	143335000	143340000	.	.	.	.	0,0,0	34	13.5178	14.4204	14.0871	14.3106	11	11	11	11	0.0422094	0.044602	0.0513002	0.0509858	NA,Kcnq1ot1	NA,4933417O13Rik
7	7199999	7204999	7	7289990	7294990	.	.	.	.	0,0,0	32	4.82381	5.35912	3.09096	5.106	6	7	4	7	1.35183e-08	6.84754e-07	6.80241e-13	8.05511e-07	NA,Zfp772	NA,Clcn4,Mir5620,Clcn4,Clcn4,Vmn2r29,Clcn4,Clcn4,Clcn4,Clcn4,Clcn4
7	24450018	24455018	7	24565001	24570001	.	.	.	.	0,0,0	52	11.4477	9.81723	9.65655	10.367	10	9	9	10	0.0115665	0.000717831	0.000836743	0.0133797	NA,Plaur,Irgc1	NA
7	28441251	28446251	7	28726248	28731248	.	.	.	.	0,0,0	34	8.89245	6.77462	6.85509	8.52753	9	8	8	9	0.000738383	2.69435e-05	3.37114e-05	0.000854993	NA,Samd4b,Lrfn1,Gmfg,Lrfn1,Gmfg,Gmfg,Mir466f-2	NA,Mrps12,Fbxo17,Sars2,Fbxo17,Mrps12,Mrps12,Mrps12
7	64510004	64515004	7	64570007	64575007	.	.	.	.	0,0,0	34	11.2604	9.36905	10.1095	5.22104	10	9	10	7	0.0115665	0.000717831	0.0132497	8.05511e-07	NA,Apba2,Apba2,Apba2	NA
7	100130000	100135000	7	100255009	100260009	.	.	.	.	0,0,0	28	9.57433	8.4365	7.51428	10.8299	9	9	8	10	0.000738383	0.000717831	3.37114e-05	0.0133797	NA,Pold3	NA,Gpx2-ps1
7	110865009	110870009	7	110989995	110994995	.	.	.	.	0,0,0	34	7.93408	11.0499	10.6096	9.34461	9	10	10	9	0.000738383	0.011802	0.0132497	0.000854993	NA,Lyve1	NA,Mrvi1
7	116339993	116344993	7	116514993	116519993	.	.	.	.	0,0,0	32	10.3825	8.28208	10.2125	10.1676	10	9	10	10	0.0115665	0.000717831	0.0132497	0.0133797	NA,Rps13	NA,Nucb2,Nucb2
7	137245000	137250000	7	137304995	137309995	.	.	.	.	0,0,0	30	11.8905	10.5165	10.8623	8.91811	10	10	10	9	0.0115665	0.011802	0.0132497	0.000854993	NA,Gm10578	NA,Ebf3,Ebf3,Ebf3
7	142204986	142209986	7	142254990	142259990	.	.	.	.	0,0,0	34	10.0127	10.4222	9.69426	11.9648	10	10	9	10	0.0115665	0.011802	0.000836743	0.0133797	NA,Krtap5-3,LOC105243090	NA
7	143159986	143164986	7	143505004	143510004	.	.	.	.	0,0,0	34	9.20127	9.69021	11.432	8.23011	9	9	10	9	0.000738383	0.000717831	0.0132497	0.000854993	NA	NA,Phlda2
7	4554999	4559999	7	4780015	4785015	.	.	.	.	0,0,0	30	3.6001	5.41425	7.6506	4.19596	5	7	8	6	5.10196e-09	8.6764e-06	0.000244761	2.28917e-07	NA,Syt5,Syt5	NA,Tmem238,Rpl28,Fam71e2,Tmem190,Il11,Il11
7	6580004	6585004	7	6709995	6714995	.	.	.	.	0,0,0	26	8.95665	6.69467	10.7157	5.84245	9	8	10	7	0.00351298	0.000214713	0.0409486	9.44824e-06	NA,Olfr1350	NA,Peg3os
7	25864995	25869995	7	25909990	25914990	.	.	.	.	0,0,0	56	11.5497	10.7415	9.19818	10.233	10	10	9	10	0.0359981	0.0378072	0.0039917	0.0412185	NA	NA,Cyp2b10
7	28189999	28194999	7	28270000	28275000	.	.	.	.	0,0,0	34	9.47096	11.806	10.7851	11.5945	9	10	10	10	0.00351298	0.0378072	0.0409486	0.0412185	NA,Dyrk1b,Dyrk1b,Dyrk1b	NA,Eid2,Eid2b
7	35542506	35547506	7	35635009	35640009	.	.	.	.	0,0,0	36	8.39335	7.29435	7.8863	9.75899	9	8	9	9	0.00351298	0.000214713	0.0039917	0.00400034	NA,Nudt19,Tdrd12	NA,Pdcd5
7	37574986	37579986	7	37764997	37769997	.	.	.	.	0,0,0	30	8.47232	8.85467	7.95738	9.77246	9	9	9	9	0.00351298	0.00361298	0.0039917	0.00400034	NA	NA,Zfp536
7	45870000	45875000	7	46005000	46010000	.	.	.	.	0,0,0	30	7.22732	9.31408	8.94013	9.88728	8	9	9	10	0.000217023	0.00361298	0.0039917	0.0412185	NA,Grin2d,Kdelr1	NA
7	48944986	48949986	7	49110009	49115009	.	.	.	.	0,0,0	50	10.1318	9.07082	8.21873	11.4321	10	9	9	10	0.0359981	0.00361298	0.0039917	0.0412185	NA,Nav2	NA
7	65859996	65864996	7	66054998	66059998	.	.	.	.	0,0,0	30	10.3235	8.52971	10.5243	10.396	10	9	10	10	0.0359981	0.00361298	0.0409486	0.0412185	NA,Pcsk6,Pcsk6	NA,Snrpa1,Snrpa1
7	66829989	66834989	7	67629996	67634996	.	.	.	.	0,0,0	30	4.4816	4.44828	2.63655	6.20397	6	6	4	7	2.63015e-07	2.73447e-07	3.6653e-11	9.44824e-06	NA,Adamts17	NA,Ttc23,Lrrc28,Ttc23,Lrrc28,Ttc23,Ttc23,Ttc23,Lrrc28,Lrrc28
7	84155006	84160006	7	84274986	84279986	.	.	.	.	0,0,0	36	11.8347	11.3299	10.9848	12.0831	10	10	10	10	0.0359981	0.0378072	0.0409486	0.0412185	NA,Abhd17c	NA
7	92439995	92444995	7	92545000	92550000	.	.	.	.	0,0,0	32	11.5497	9.87537	10.8881	10.8361	10	10	10	10	0.0359981	0.0378072	0.0409486	0.0412185	NA	NA,Ccdc90b,Ccdc90b
7	99939986	99944986	7	100104993	100109993	.	.	.	.	0,0,0	30	9.15591	8.83796	7.28344	9.94064	9	9	8	10	0.00351298	0.00361298	0.000244761	0.0412185	NA	NA,Pold3
7	100275002	100280002	7	100385004	100390004	.	.	.	.	0,0,0	58	7.68819	7.67035	10.3578	6.22917	8	8	10	7	0.000217023	0.000214713	0.0409486	9.44824e-06	NA,P4ha3,Gpx2-ps1	NA
7	100975004	100980004	7	101235000	101240000	.	.	.	.	0,0,0	26	8.04985	9.70329	8.98474	11.1601	9	9	9	10	0.00351298	0.00361298	0.0039917	0.0412185	NA,P2ry6	NA
7	102044991	102049991	7	102199986	102204986	.	.	.	.	0,0,0	26	9.9683	10.388	11.525	12.2109	10	10	10	10	0.0359981	0.0378072	0.0409486	0.0412185	NA	NA,Nup98,Nup98,Nup98,Nup98,Nup98,Pgap2
7	107225004	107230004	7	107360005	107365005	.	.	.	.	0,0,0	32	9.24835	8.83225	10.1232	8.93763	9	9	10	9	0.00351298	0.00361298	0.0409486	0.00400034	NA	NA,Syt9
7	107990008	107995008	7	108030004	108035004	.	.	.	.	0,0,0	36	9.2416	9.09378	7.83227	7.23779	9	9	8	8	0.00351298	0.00361298	0.000244761	0.000247555	NA,Olfr477	NA,Olfr478
7	116845004	116850004	7	117374997	117379997	.	.	.	.	0,0,0	32	4.72908	5.69014	4.4067	7.30005	6	7	6	8	2.63015e-07	8.6764e-06	2.33749e-07	0.000247555	NA	NA,Xylt1
7	117087505	117092505	7	117372500	117377500	.	.	.	.	0,0,0	28	8.85132	9.05547	9.18967	10.8657	9	9	9	10	0.00351298	0.00361298	0.0039917	0.0412185	NA	NA,Xylt1
7	119399997	119404997	7	119484995	119489995	.	.	.	.	0,0,0	28	11.2762	11.848	11.1706	9.19498	10	10	10	9	0.0359981	0.0378072	0.0409486	0.00400034	NA	NA,Umod,Umod
7	130765004	130770004	7	130994986	130999986	.	.	.	.	0,0,0	26	10.5991	8.31828	9.27095	8.29152	10	9	9	9	0.0359981	0.00361298	0.0039917	0.00400034	NA,Btbd16	NA
7	131164995	131169995	7	131224991	131229991	.	.	.	.	0,0,0	30	12.1175	12.3521	11.2184	9.88924	10	10	10	10	0.0359981	0.0378072	0.0409486	0.0412185	NA,5430419D17Rik	NA
7	140075002	140080002	7	140826663	140831663	.	.	.	.	0,0,0	30	9.52635	8.09689	8.05789	9.87986	9	9	9	10	0.00351298	0.00361298	0.0039917	0.0412185	NA,Caly,Caly,Caly	NA,Urah,Urah,Urah,Zfp941
7	143150000	143155000	7	143294991	143299991	.	.	.	.	0,0,0	26	10.5387	9.17261	10.0447	9.30328	10	9	10	9	0.0359981	0.00361298	0.0409486	0.00400034	NA	NA,Kcnq1ot1
7	27440004	27445004	7	27580000	27585000	.	.	.	.	0,0,0	30	5.96948	7.56157	8.86708	8.85858	7	8	9	9	8.85484e-05	0.00138095	0.0154667	0.0154249	NA,Sptbn4,Blvrb,Blvrb	NA,Akt2,Akt2
7	27590000	27595000	7	27729995	27734995	.	.	.	.	0,0,0	24	11.1913	9.49837	7.15434	7.96402	10	9	8	9	0.0953865	0.0147084	0.00147685	0.0154249	NA,Akt2,Akt2,Akt2,Akt2	NA,Zfp60,Zfp60
7	27744987	27749987	7	27849991	27854991	.	.	.	.	0,0,0	30	7.74987	7.89531	8.06498	7.11723	8	9	9	8	0.00131139	0.0147084	0.0154667	0.00147889	NA	NA,Zfp59,Zfp607a
7	73020008	73025008	7	73295012	73300012	.	.	.	.	0,0,0	24	5.76788	7.43938	9.2308	5.25975	7	8	9	7	8.85484e-05	0.00138095	0.0154667	9.10705e-05	NA	NA,4930429H19Rik
7	100459987	100464987	7	100630000	100635000	.	.	.	.	0,0,0	24	6.56589	8.17372	7.43308	8.64583	8	9	8	9	0.00131139	0.0147084	0.00147685	0.0154249	NA,Ucp3	NA
7	111184995	111189995	7	111775000	111780000	.	.	.	.	0,0,0	24	6.31862	7.26788	8.1993	8.72249	8	8	9	9	0.00131139	0.00138095	0.0154667	0.0154249	NA	NA,Galnt18,Galnt18
7	119020006	119025006	7	119184995	119189995	.	.	.	.	0,0,0	24	5.49032	5.09323	7.95783	4.30486	7	7	9	6	8.85484e-05	8.88559e-05	0.0154667	3.63241e-06	NA	NA,Gpr139
7	119845000	119850000	7	120200000	120205000	.	.	.	.	0,0,0	34	5.48757	5.6534	6.67721	8.03567	7	7	8	9	8.85484e-05	8.88559e-05	0.00147685	0.0154249	NA	NA,Abca14,Crym
7	120834997	120839997	7	121025008	121030008	.	.	.	.	0,0,0	24	4.41459	5.08677	7.85325	4.79078	6	7	9	6	4.05494e-06	8.88559e-05	0.0154667	3.63241e-06	NA,Eef2k,Eef2k,Eef2k	NA,Mettl9
7	122674991	122679991	7	122825000	122830000	.	.	.	.	0,0,0	24	7.0705	8.56808	9.79671	6.19803	8	9	9	7	0.00131139	0.0147084	0.0154667	9.10705e-05	NA,Cacng3	NA
7	133950002	133955002	7	134229988	134234988	.	.	.	.	0,0,0	32	8.78032	8.66578	7.72342	8.42852	9	9	8	9	0.0137964	0.0147084	0.00147685	0.0154249	NA	NA,Adam12
7	136244991	136249991	7	136335012	136340012	.	.	.	.	0,0,0	30	7.91263	8.02862	6.19674	8.67663	9	9	7	9	0.0137964	0.0147084	9.42026e-05	0.0154249	NA	NA,C230079O03Rik
7	142344987	142349987	7	142480005	142485005	.	.	.	.	0,0,0	68	5.52399	7.99381	7.74489	7.5035	7	9	8	8	8.85484e-05	0.0147084	0.00147685	0.00147889	NA	NA,Lsp1,Lsp1,Lsp1
7	4345000	4350000	7	4410008	4415008	.	.	.	.	0,0,0	22	5.88246	5.6652	4.76325	7.07811	7	7	6	8	0.000665805	0.000719886	4.80606e-05	0.00710092	NA,Ncr1	NA,Gp6
7	4720008	4725008	7	4935004	4940004	.	.	.	.	0,0,0	22	6.2374	6.67283	5.78923	7.01988	8	8	7	8	0.00629987	0.00702475	0.000695252	0.00710092	NA,Tmem150b,Tmem150b	NA,Ssc5d,Nat14,Nat14,Nat14,Nat14
7	6355000	6360000	7	6695000	6700000	.	.	.	.	0,0,0	22	5.79044	6.05101	9.21419	7.80357	7	7	9	8	0.000665805	0.000719886	0.0493812	0.00710092	NA,Zfp78,Zfp78,Zfp78	NA,Peg3os,Zim1
7	16289999	16294999	7	16469991	16474991	.	.	.	.	0,0,0	22	7.25949	5.03349	5.82256	4.65351	8	7	7	6	0.00629987	0.000719886	0.000695252	4.51999e-05	NA,Ccdc9,Ccdc9	NA,Npas1
7	19435004	19440004	7	19640004	19645004	.	.	.	.	0,0,0	28	8.88103	8.87384	8.45235	9.25325	9	9	9	9	0.0450188	0.0482933	0.0493812	0.049304	NA	NA,Relb,Relb
7	30240008	30245008	7	30419987	30424987	.	.	.	.	0,0,0	22	3.92451	4.43546	3.78671	4.27268	5	6	5	6	2.72829e-06	5.91206e-05	2.19098e-06	4.51999e-05	NA,Tbcb,Polr2i,Ovol3,Tbcb,Tbcb	NA,Hcst,Nfkbid,Nfkbid,Nfkbid,Tyrobp
7	35294995	35299995	7	35570000	35575000	.	.	.	.	0,0,0	22	5.23761	5.43245	5.69559	6.35027	7	7	7	8	0.000665805	0.000719886	0.000695252	0.00710092	NA	NA,Ankrd27,Rgs9bp,Ankrd27,Ankrd27,Ankrd27
7	43915004	43920004	7	44235001	44240001	.	.	.	.	0,0,0	28	8.41113	7.11719	5.83696	7.9222	9	8	7	9	0.0450188	0.00702475	0.000695252	0.049304	NA	NA,2410002F23Rik,Klk1,Klk1,Snord88a,Snord88c,Klk1,1700028J19Rik
7	65725004	65730004	7	65815008	65820008	.	.	.	.	0,0,0	30	7.46406	7.62597	6.2275	8.02769	8	8	7	9	0.00629987	0.00702475	0.000695252	0.049304	NA	NA,1810008I18Rik
7	70360004	70365004	7	70794995	70799995	.	.	.	.	0,0,0	36	3.48239	3.13537	5.06687	3.33892	5	4	7	5	2.72829e-06	1.12385e-07	0.000695252	1.9749e-06	NA,B130024G19Rik,Nr2f2,Nr2f2	NA
7	73140004	73145004	7	73374997	73379997	.	.	.	.	0,0,0	28	7.89754	7.57844	6.96053	7.68533	9	8	8	8	0.0450188	0.00702475	0.00703196	0.00710092	NA	NA,A730056A06Rik,A730056A06Rik,Rgma
7	73739987	73744987	7	74004995	74009995	.	.	.	.	0,0,0	22	7.65772	7.62135	8.09973	7.34495	8	8	9	8	0.00629987	0.00702475	0.0493812	0.00710092	NA,Fam174b	NA,St8sia2
7	78265000	78270000	7	78565000	78570000	.	.	.	.	0,0,0	28	7.49144	7.40712	6.77643	9.83727	8	8	8	9	0.00629987	0.00702475	0.00703196	0.049304	NA	NA,Ntrk3,Ntrk3
7	79605002	79610002	7	79729995	79734995	.	.	.	.	0,0,0	32	7.20733	7.26079	7.6108	8.82013	8	8	8	9	0.00629987	0.00702475	0.00703196	0.049304	NA,Rhcg	NA,Pex11a,Plin1,Plin1,Wdr93,Pex11a
7	82865002	82870002	7	83080006	83085006	.	.	.	.	0,0,0	34	7.78056	7.31133	8.56596	6.78095	8	8	9	8	0.00629987	0.00702475	0.0493812	0.00710092	NA,Mex3b	NA
7	90014995	90019995	7	90100008	90105008	.	.	.	.	0,0,0	50	6.15889	7.8148	9.53879	7.13604	7	8	9	8	0.000665805	0.00702475	0.0493812	0.00710092	NA,E230029C05Rik,E230029C05Rik	NA
7	90474996	90479996	7	90690004	90695004	.	.	.	.	0,0,0	22	8.74984	8.32312	7.39451	9.68558	9	9	8	9	0.0450188	0.0482933	0.00703196	0.049304	NA,Tmem126b	NA
7	92560007	92565007	7	92624992	92629992	.	.	.	.	0,0,0	32	9.3859	7.38599	8.78691	7.1891	9	8	9	8	0.0450188	0.00702475	0.0493812	0.00710092	NA,Ccdc90b,Ccdc90b	NA,Ankrd42
7	97485011	97490011	7	97670000	97675000	.	.	.	.	0,0,0	28	7.3989	7.99236	6.24619	8.79321	8	9	8	9	0.00629987	0.0482933	0.00703196	0.049304	NA,Ints4,Ints4	NA
7	97904999	97909999	7	97974992	97979992	.	.	.	.	0,0,0	30	9.03204	8.9799	8.93662	9.04182	9	9	9	9	0.0450188	0.0482933	0.0493812	0.049304	NA,Gdpd4	NA
7	108845009	108850009	7	108905000	108910000	.	.	.	.	0,0,0	32	9.23022	9.45862	9.36541	9.80491	9	9	9	9	0.0450188	0.0482933	0.0493812	0.049304	NA,Olfr516	NA,Olfr519
7	115450000	115455000	7	116034996	116039996	.	.	.	.	0,0,0	24	6.12523	5.6812	4.86542	6.60542	7	7	6	8	0.000665805	0.000719886	4.80606e-05	0.00710092	NA	NA,Sox6os,Sox6,Sox6
7	116930001	116935001	7	117370007	117375007	.	.	.	.	0,0,0	28	5.29666	5.46164	4.9721	8.33991	7	7	7	9	0.000665805	0.000719886	0.000695252	0.049304	NA	NA,Xylt1
7	119515007	119520007	7	119670000	119675000	.	.	.	.	0,0,0	22	7.3953	6.43662	5.96716	5.22965	8	8	7	7	0.00629987	0.00702475	0.000695252	0.000691176	NA,Acsm5,Pdilt	NA
7	126480000	126485000	7	126639996	126644996	.	.	.	.	0,0,0	26	6.959	7.06918	6.40039	5.86834	8	8	8	7	0.00629987	0.00702475	0.00703196	0.000691176	NA,Sh2b1,Sh2b1,Sh2b1,Tufm,Sh2b1,Sh2b1,Sh2b1,Sh2b1,Tufm,Sh2b1	NA,Sgf29
7	130062498	130067498	7	130260003	130265003	.	.	.	.	0,0,0	44	5.7808	5.17073	4.92204	7.20355	7	7	6	8	0.000665805	0.000719886	4.80606e-05	0.00710092	NA	NA,Fgfr2,Fgfr2,Fgfr2
7	130615000	130620000	7	130699996	130704996	.	.	.	.	0,0,0	30	8.68157	9.03149	9.43513	7.75792	9	9	9	8	0.0450188	0.0482933	0.0493812	0.00710092	NA	NA,Tacc2,Tacc2
7	133495011	133500011	7	133630000	133635000	.	.	.	.	0,0,0	26	7.54242	7.80394	8.90104	8.60378	8	8	9	9	0.00629987	0.00702475	0.0493812	0.049304	NA	NA,Edrf1
7	134375007	134380007	7	134545007	134550007	.	.	.	.	0,0,0	24	7.51117	8.37729	8.2978	8.38311	8	9	9	9	0.00629987	0.0482933	0.0493812	0.049304	NA,D7Ertd443e,D7Ertd443e	NA
7	134800003	134805003	7	134935000	134940000	.	.	.	.	0,0,0	24	7.3506	7.23524	7.89293	8.17948	8	8	9	9	0.00629987	0.00702475	0.0493812	0.049304	NA	NA,Fam196a
7	140194988	140199988	7	140804992	140809992	.	.	.	.	0,0,0	26	7.46626	7.41566	8.28832	7.57732	8	8	9	8	0.00629987	0.00702475	0.0493812	0.00710092	NA,Olfr524	NA,Zfp941
7	141675007	141680007	7	141929988	141934988	.	.	.	.	0,0,0	30	4.74484	6.04395	8.86229	5.58701	6	7	9	7	4.84291e-05	0.000719886	0.0493812	0.000691176	NA,Muc2	NA
7	145034994	145039994	7	145200009	145205009	.	.	.	.	0,0,0	38	6.63969	7.55834	8.61211	7.87306	8	8	9	9	0.00629987	0.00702475	0.0493812	0.049304	NA	NA,1810010D01Rik
8	71369958	71374958	8	71404999	71409999	.	.	.	.	0,0,0	104	41.8287	34.0985	40.8601	41.8233	16	15	16	16	5.7131e-06	3.70094e-10	8.21349e-06	9.22495e-06	NA,Use1,Ocel1,Ocel1,Use1,Nr2f6,Ocel1	NA,Ankle1,Babam1,Ankle1,Ushbp1
8	94158087	94163087	8	94196092	94201092	.	.	.	.	0,0,0	104	30.0819	25.7627	31.8492	25.8308	14	14	15	14	1.57718e-15	1.97156e-15	3.849e-10	2.29358e-15	NA,Mt2,Mt3	NA
8	105361648	105366648	8	105399965	105404965	.	.	.	.	0,0,0	108	40.6803	40.4842	45.1046	36.7656	16	16	16	15	0.0023763	0.00297397	0.00315059	2.19066e-06	NA,Plekhg4,Plekhg4	NA,Kctd19,Kctd19,Lrrc36
8	111387612	111392612	8	111435000	111440000	.	.	.	.	0,0,0	76	28.6092	28.6148	24.6995	38.5362	14	14	14	15	3.9216e-09	4.92559e-09	5.77913e-09	2.60038e-05	NA,Fa2h	NA
8	120750044	120755044	8	120785044	120790044	.	.	.	.	0,0,0	76	44.4602	39.1433	37.3075	43.1774	16	16	15	16	0.0117054	0.0135774	2.52089e-05	0.0161365	NA,Irf8	NA
8	13682520	13687520	8	13744839	13749839	.	.	.	.	0,0,0	74	15.7678	17.7001	26.5908	27.2356	12	12	14	14	3.16643e-17	2.48123e-17	2.95884e-08	3.01569e-08	NA,Rasa3	NA,Cdc16,Cdc16
8	70667480	70672480	8	70705038	70710038	.	.	.	.	0,0,0	72	33.0064	31.0147	47.9847	26.258	15	15	16	14	0.000192337	0.000235937	0.0632037	1.44358e-07	NA,Pgpep1,Lsm4,Lsm4	NA,Jund,Jund,Gm3336
8	70541682	70546682	8	70583351	70588351	.	.	.	.	0,0,0	74	26.6252	26.4093	31.9207	33.1729	14	14	15	15	4.40002e-07	5.52596e-07	0.000716992	0.000740405	NA,Ell	NA,Isyna1
8	3385101	3390101	8	3430067	3435067	.	.	.	.	0,0,0	68	27.3716	31.9685	26.9325	33.7779	14	15	14	15	1.8701e-06	0.001744	2.63979e-06	0.00200874	NA,Arhgef18	NA
8	122571638	122576638	8	122608327	122613327	.	.	.	.	0,0,0	80	28.5024	24.1325	21.6381	25.9167	14	13	13	14	1.8701e-06	4.9858e-10	7.08045e-10	2.6784e-06	NA,Cdt1,Aprt	NA,Galns,Galns,Mir6396,Trappc2l,Pabpn1l
8	25440785	25445785	8	25511686	25516686	.	.	.	.	0,0,0	68	22.989	23.5797	29.2327	28.1805	13	13	14	14	3.24053e-09	3.18063e-09	1.04601e-05	1.06657e-05	NA	NA,Fgfr1,Fgfr1,Fgfr1
8	72490006	72495006	8	72549900	72554900	.	.	.	.	0,0,0	72	24.2913	23.7264	22.7332	19.101	13	13	13	12	3.24053e-09	3.18063e-09	4.52821e-09	5.09776e-13	NA,Slc35e1	NA,Med26
8	85114938	85119938	8	85150092	85155092	.	.	.	.	0,0,0	66	35.7406	32.0759	37.6015	29.4212	15	15	15	14	0.0036945	0.00432547	0.00489899	1.06657e-05	NA,Zfp791,Zfp791	NA,Cks1brt
8	110919944	110924944	8	110955045	110960045	.	.	.	.	0,0,0	102	29.5731	32.1742	31.0588	32.6041	14	15	15	15	7.55894e-06	0.00432547	0.00489899	0.00505609	NA,St3gal2	NA
8	119414957	119419957	8	119502581	119507581	.	.	.	.	0,0,0	64	19.9778	21.1593	23.2364	29.4465	13	13	13	14	1.90236e-08	1.89333e-08	2.68023e-08	3.97569e-05	NA	NA,Slc38a8
8	24394986	24399986	8	24439946	24444946	.	.	.	.	0,0,0	62	30.7881	25.0466	24.6954	30.0393	14	14	14	14	9.71061e-05	0.000119655	0.000135863	0.000138322	NA	NA,Tcim
8	88200000	88205000	8	88235008	88240008	.	.	.	.	0,0,0	86	32.4331	30.8459	33.1685	33.6988	15	14	15	15	0.0192299	0.000119655	0.0256062	0.0264397	NA,Papd5,Papd5,Papd5	NA
8	11317487	11322487	8	11360012	11365012	.	.	.	.	0,0,0	86	21.8056	27.3358	27.8857	28.9013	13	14	14	14	5.37625e-07	0.000387068	0.000446413	0.000448046	NA,Col4a2,Col4a1,Col4a1	NA
8	12624925	12629925	8	12675000	12680000	.	.	.	.	0,0,0	64	25.8536	25.7085	29.3135	21.2722	14	14	14	13	0.000315754	0.000387068	0.000446413	7.49769e-07	NA	NA,Tubgcp3
8	45790091	45795091	8	45930015	45935015	.	.	.	.	0,0,0	130	20.473	20.1926	19.2191	29.8071	13	13	12	14	5.37625e-07	5.50919e-07	3.45156e-10	0.000448046	NA	NA,Ccdc110
8	111675000	111680000	8	111715000	111720000	.	.	.	.	0,0,0	68	37.6516	31.0535	27.6212	31.3429	15	15	14	15	0.0402183	0.0441069	0.000446413	0.055271	NA,Mir7076,Ctrb1	NA,Bcar1
8	123724932	123729932	8	123773363	123778363	.	.	.	.	0,0,0	60	29.177	30.3964	29.7447	33.8882	14	14	14	15	0.000315754	0.000387068	0.000446413	0.055271	NA,6030466F02Rik	NA
8	57430017	57435017	8	57504969	57509969	.	.	.	.	0,0,0	74	17.4287	17.9898	30.7589	17.1928	12	12	14	12	2.00439e-09	1.74819e-09	0.00137067	2.50048e-09	NA	NA,Hmgb2,Hmgb2,Hmgb2,2500002B13Rik,Hmgb2
8	104346658	104351658	8	104391669	104396669	.	.	.	.	0,0,0	60	25.054	23.8265	30.6455	24.71	14	13	14	14	0.000956817	2.69855e-06	0.00137067	0.00137378	NA,Cmtm3	NA,Cmtm4
8	122834978	122839978	8	122869978	122874978	.	.	.	.	0,0,0	60	30.2582	29.7361	29.7971	29.0996	14	14	14	14	0.000956817	0.00118414	0.00137067	0.00137378	NA,Cdh15	NA
8	124895000	124900000	8	124942509	124947509	.	.	.	.	0,0,0	56	19.2096	19.6692	21.9546	18.5968	12	13	13	12	1.40341e-08	1.21293e-05	1.63764e-05	1.78741e-08	NA,Exoc8,Sprtn	NA,Egln1,Egln1
[truncated: 2,395 more rows]

## Sheet: shared
chr1	x1	x2	chr2	y1	y2	name	score	strand1	strand2	color	observed	expectedBL	expectedDonut	expectedH	expectedV	binBL	binDonut	binH	binV	fdrBL	fdrDonut	fdrH	fdrV	target1	target2
1	171513834	171518834	1	171572929	171577929	.	.	.	.	0,0,0	506	89.9547	108.424	120.845	115.999	19	20	20	20	1.26924e-31	2.69442e-19	4.26158e-19	5.42026e-19	NA,Alyref2	NA
1	85270214	85275214	1	85591561	85596561	.	.	.	.	0,0,0	312	7.48824	13.8444	11.973	34.1137	8	11	10	15	0	0	0	0	NA,C130026I21Rik,C130026I21Rik	NA,Sp140,Sp110,Sp110
1	153554001	153559001	1	153741571	153746571	.	.	.	.	0,0,0	254	25.5758	20.8682	26.1873	26.2523	14	13	14	14	0	0	0	0	NA,Npl	NA,Rnasel,C230024C17Rik,Rgs16
1	133310779	133315779	1	133353808	133358808	.	.	.	.	0,0,0	306	56.9991	52.7734	56.7824	57.196	17	17	17	17	7.4351e-30	6.46079e-30	9.75108e-30	9.43163e-30	NA,Golt1a,Kiss1	NA,Ren2,Etnk2,Ren1
1	133735666	133740666	1	133893362	133898362	.	.	.	.	0,0,0	212	26.808	25.1381	31.6908	39.541	14	14	15	16	0	0	0	2.00038e-32	NA,Mir6903	NA,Optc,Optc,Optc,Optc
1	91424304	91429304	1	91481286	91486286	.	.	.	.	0,0,0	190	26.4071	27.4263	34.6702	30.7535	14	14	15	14	0	0	4.49888e-40	0	NA,Hes6,Hes6,Hes6	NA,Traf3ip1
1	172413260	172418260	1	172486986	172491986	.	.	.	.	0,0,0	156	19.0625	18.7989	26.9121	20.3269	12	12	14	13	0	0	0	0	NA	NA,Slamf9,Igsf9,Igsf9,Tagln2
1	133041922	133046922	1	133091267	133096267	.	.	.	.	0,0,0	212	33.5787	34.1858	38.9594	38.109	15	15	16	15	6.25665e-37	8.28988e-37	1.69105e-26	1.01582e-36	NA,Mdm4,Pik3c2b	NA
1	85851490	85856490	1	86008707	86013707	.	.	.	.	0,0,0	166	19.4883	19.4855	19.8531	18.7252	12	12	13	12	0	0	0	0	NA	NA,Spata3,Spata3,Spata3,Spata3
1	86660193	86665193	1	87040067	87045067	.	.	.	.	0,0,0	222	17.0384	22.6432	32.3288	42.38	12	13	15	16	0	0	1.91549e-33	5.42491e-24	NA,Nppc	NA
1	74309772	74314772	1	74360903	74365903	.	.	.	.	0,0,0	176	28.3804	32.5013	38.4662	40.0602	14	15	15	16	3.84191e-40	1.99524e-30	2.96438e-30	1.97882e-21	NA,Tmbim1	NA,Slc11a1,Catip
1	92839036	92844036	1	92893125	92898125	.	.	.	.	0,0,0	146	35.3593	31.6246	39.1399	31.3124	15	15	16	15	1.83199e-22	2.07532e-22	5.59631e-15	2.60319e-22	NA,Mir149,Gpc1	NA,Dusp28,Ankmy1,Ankmy1
1	132308836	132313836	1	132352704	132357704	.	.	.	.	0,0,0	150	32.4108	27.1464	31.3448	31.0648	15	14	15	15	1.22249e-20	2.33369e-28	1.65459e-20	1.83471e-20	NA,Nuak2,Nuak2,Klhdc8a	NA,Tmcc2
1	20934414	20939414	1	21157271	21162271	.	.	.	.	0,0,0	134	11.3326	10.6986	12.0737	12.7038	10	10	10	11	0	0	0	0	NA,Efhc1	NA
1	171358672	171363672	1	171480165	171485165	.	.	.	.	0,0,0	142	26.1253	23.1689	23.5083	31.2722	14	13	13	15	2.35527e-27	1.11592e-35	2.22631e-35	1.41333e-19	NA,Nectin4,Nectin4,Klhdc9	NA
1	36074721	36079721	1	36129615	36134615	.	.	.	.	0,0,0	140	34.3741	27.8961	30.5409	37.438	15	14	14	15	5.32866e-18	3.85086e-25	5.28173e-25	7.95862e-18	NA,Hs6st1	NA,Mir6897
1	133176695	133181695	1	133300516	133305516	.	.	.	.	0,0,0	230	23.0663	24.9589	32.7371	30.9595	13	14	15	15	4.78911e-33	3.85086e-25	6.77278e-18	7.95862e-18	NA	NA,Golt1a
1	92519419	92524419	1	92608573	92613573	.	.	.	.	0,0,0	132	24.6254	24.9989	31.7145	28.862	14	14	15	14	3.40918e-24	4.28573e-24	4.64055e-17	5.07213e-24	NA,Olfr1414	NA,Olfr1411,Olfr1410,Olfr12
1	152524030	152529030	1	152746093	152751093	.	.	.	.	0,0,0	154	15.4895	13.8515	18.6897	16.188	11	11	12	12	0	0	8.72859e-40	7.73982e-40	NA	NA,Apobec4
1	155289334	155294334	1	155529126	155534126	.	.	.	.	0,0,0	116	15.0014	11.4939	17.5259	12.7341	11	10	12	11	0	0	2.41593e-38	0	NA	NA,Gm5532
1	134979165	134984165	1	135106328	135111328	.	.	.	.	0,0,0	142	20.8887	21.5848	28.1687	24.2918	13	13	14	13	2.17748e-29	1.77663e-29	6.00712e-22	3.09295e-29	NA	NA,Lgr6
1	153892212	153897212	1	154178280	154183280	.	.	.	.	0,0,0	118	14.2644	13.3762	19.0301	17.9629	11	11	12	12	0	0	5.93636e-37	4.94897e-37	NA,Glul,Teddm1a,Mir8114	NA
1	180719021	180724021	1	180760137	180765137	.	.	.	.	0,0,0	114	32.8737	32.8437	41.3209	34.5747	15	15	16	15	1.61131e-15	2.03361e-15	1.34007e-09	2.36362e-15	NA,Acbd3	NA
1	134054167	134059167	1	134101856	134106856	.	.	.	.	0,0,0	154	40.2672	31.6768	31.1489	41.7658	16	15	15	16	3.13698e-09	1.31183e-14	1.35647e-14	4.9971e-09	NA	NA,Chit1,Chit1,Chit1
1	161992005	161997005	1	162317216	162322216	.	.	.	.	0,0,0	148	20.534	24.2617	38.87	31.3623	13	13	16	15	3.44452e-28	2.74828e-28	5.09395e-09	1.50557e-14	NA,2810442N19Rik,4930558K02Rik	NA
1	133174949	133179949	1	133358040	133363040	.	.	.	.	0,0,0	158	27.3696	33.0312	41.8063	38.6685	14	15	16	15	3.53561e-20	8.08384e-14	1.94193e-08	8.94341e-14	NA	NA,Ren2,Etnk2,Ren1
1	133908173	133913173	1	134040451	134045451	.	.	.	.	0,0,0	136	22.3184	14.8575	17.7322	18.6382	13	11	12	12	4.97742e-27	0	3.17996e-34	2.67067e-34	NA,Optc,Prelp,Optc,Optc,Optc	NA,Fmod
1	191965888	191970888	1	192085408	192090408	.	.	.	.	0,0,0	124	38.2309	24.1618	28.3784	36.4774	15	13	14	15	6.29928e-14	4.10944e-27	5.46145e-20	8.94341e-14	NA,Rd3,Rd3,Rd3	NA,Traf5
1	180989498	180994498	1	181035067	181040067	.	.	.	.	0,0,0	130	23.9351	23.658	28.5034	20.3929	13	13	14	13	7.27892e-26	5.87378e-26	5.00865e-19	1.01444e-25	NA	NA,9130409I23Rik
1	65111975	65116975	1	65176439	65181439	.	.	.	.	0,0,0	150	29.9185	28.5396	33.23	27.8506	14	14	15	14	2.97045e-18	3.70631e-18	2.79945e-12	4.3243e-18	NA,D630023F18Rik,D630023F18Rik,D630023F18Rik,Cryga	NA,Pikfyve,Idh1,Idh1,Pikfyve
1	135461075	135466075	1	135533498	135538498	.	.	.	.	0,0,0	120	20.8578	18.9001	24.9608	20.3212	13	12	14	13	1.0015e-24	7.07748e-32	4.41437e-18	1.40395e-24	NA,Mir1231	NA
1	75336362	75341362	1	75467253	75472253	.	.	.	.	0,0,0	188	34.4084	24.6868	31.3727	36.0012	15	14	15	15	1.16266e-11	3.1761e-17	1.55205e-11	1.62811e-11	NA	NA,Tmem198,Chpf,Chpf
1	181888162	181893162	1	182114416	182119416	.	.	.	.	0,0,0	162	19.0755	15.3629	18.5524	25.8379	12	11	12	14	2.23593e-30	7.53749e-38	3.07892e-30	3.71377e-17	NA	NA,Srp9
1	189887388	189892388	1	189925055	189930055	.	.	.	.	0,0,0	124	27.1921	24.2988	25.6499	28.415	14	13	14	14	2.50319e-17	1.11527e-23	3.78396e-17	3.71377e-17	NA	NA,Smyd2
1	191833593	191838593	1	192097490	192102490	.	.	.	.	0,0,0	96	12.9453	10.4966	15.9271	12.5069	11	10	12	11	1.57554e-37	0	3.07892e-30	1.86493e-37	NA,Nek2	NA,Traf5
1	88745384	88750384	1	89197518	89202518	.	.	.	.	0,0,0	94	7.89979	8.17469	12.1996	9.36101	9	9	10	9	0	0	0	0	NA,Platr5	NA
1	135710060	135715060	1	135748361	135753361	.	.	.	.	0,0,0	138	27.6031	26.4778	27.9833	27.971	14	14	14	14	2.05036e-16	2.56944e-16	3.10266e-16	3.03456e-16	NA,Csrp1	NA
1	135750027	135755027	1	135787512	135792512	.	.	.	.	0,0,0	154	33.3413	33.5647	31.2751	33.3058	15	15	15	15	5.88635e-11	7.62303e-11	7.95008e-11	8.22441e-11	NA,Phlda3	NA,Tnni1,Tnni1
1	88463766	88468766	1	88700625	88705625	.	.	.	.	0,0,0	146	14.0234	18.1251	15.8365	27.8642	11	12	12	14	1.28888e-34	5.53615e-28	1.14692e-27	2.29358e-15	NA	NA,Arl4c
1	90201788	90206788	1	90588144	90593144	.	.	.	.	0,0,0	100	18.3839	14.1582	13.584	21.6547	12	11	11	13	8.23039e-28	6.99327e-35	1.45572e-34	2.80378e-21	NA,Ackr3,Ackr3	NA,Cops8
1	132161617	132166617	1	132231767	132236767	.	.	.	.	0,0,0	110	21.747	22.154	24.5479	32.0709	13	13	13	15	2.03117e-21	1.77314e-21	2.90154e-21	4.11174e-10	NA	NA,Lemd1,Lemd1,Lemd1
1	72719031	72724031	1	72846330	72851330	.	.	.	.	0,0,0	120	17.4544	10.5009	12.1717	13.7526	12	10	10	11	1.4743e-26	1.18293e-40	2.39684e-40	4.21462e-33	NA,Rpl37a	NA
1	134144544	134149544	1	134239420	134244420	.	.	.	.	0,0,0	122	28.1041	36.6598	48.368	26.9638	14	15	16	14	1.20082e-14	1.80841e-09	2.47098e-05	1.72595e-14	NA	NA,Adora1,Adora1,Adora1,Adora1,Adora1
1	180433759	180438759	1	180481217	180486217	.	.	.	.	0,0,0	96	38.9973	37.168	39.8584	33.2359	16	15	16	15	1.79186e-05	1.80841e-09	2.47098e-05	1.92821e-09	NA	NA,Stum
1	36548999	36553999	1	36629533	36634533	.	.	.	.	0,0,0	130	23.3187	25.0782	34.4624	31.2895	13	14	15	15	2.55042e-19	1.05646e-13	8.61474e-09	8.69917e-09	NA,Sema4c,Ankrd39,Ankrd23,Ankrd39,Sema4c,Ankrd39,Sema4c	NA
1	63757508	63762508	1	64440121	64445121	.	.	.	.	0,0,0	100	10.7208	12.9178	13.8969	20.2306	10	11	11	13	2.0547e-38	5.13528e-32	1.10384e-31	3.67821e-19	NA,4933402D24Rik	NA
1	128589380	128594380	1	128820599	128825599	.	.	.	.	0,0,0	116	15.0174	12.0293	14.3699	18.5896	11	10	11	12	1.03204e-31	6.41936e-39	1.10384e-31	3.16835e-25	NA,Cxcr4,Cxcr4	NA
1	133380096	133385096	1	133419998	133424998	.	.	.	.	0,0,0	98	33.9268	28.2447	30.3018	34.6594	15	14	14	15	6.38484e-09	1.05646e-13	1.27592e-13	8.69917e-09	NA	NA,Sox13
1	155048525	155053525	1	155091448	155096448	.	.	.	.	0,0,0	162	29.8864	27.6923	20.9977	25.8219	14	14	13	14	8.76233e-14	1.05646e-13	3.67202e-19	1.25599e-13	NA	NA,Ier5,Gm9530
1	133959075	133964075	1	134040969	134045969	.	.	.	.	0,0,0	128	20.8878	19.7803	22.6256	21.7204	13	13	13	13	2.75662e-18	2.59788e-18	3.99987e-18	3.95842e-18	NA	NA,Fmod
1	170901288	170906288	1	170991302	170996302	.	.	.	.	0,0,0	164	20.328	16.8804	24.6661	14.5946	13	12	14	11	2.75662e-18	3.10951e-24	8.61573e-13	2.92052e-30	NA,Fcrlb	NA
1	179750688	179755688	1	179789257	179794257	.	.	.	.	0,0,0	110	35.057	31.1591	35.1858	34.7548	15	15	15	15	2.78605e-08	3.61399e-08	3.69714e-08	3.77145e-08	NA	NA,Ahctf1
1	180902590	180907590	1	180972716	180977716	.	.	.	.	0,0,0	104	21.6013	23.2527	28.8973	30.0819	13	13	14	14	2.75662e-18	2.59788e-18	8.61573e-13	8.57069e-13	NA,Pycr2,Lefty2	NA
1	133380873	133385873	1	133602620	133607620	.	.	.	.	0,0,0	118	18.9087	15.5972	18.572	28.2243	12	12	12	14	6.64834e-23	4.98807e-23	9.0752e-23	5.53007e-12	NA	NA,Snrpe
1	165586063	165591063	1	165639686	165644686	.	.	.	.	0,0,0	114	36.0863	37.5604	35.0499	43.8895	15	15	15	16	1.12506e-07	1.42885e-07	1.48086e-07	0.000598034	NA	NA,Mpzl1,Mpzl1,Mpzl1
1	191833500	191838500	1	191961968	191966968	.	.	.	.	0,0,0	128	11.815	10.0747	16.3224	10.0645	10	10	12	10	2.61971e-35	1.10384e-35	9.0752e-23	2.39572e-35	NA,Nek2	NA,Rd3,Rd3,Rd3
1	154281102	154286102	1	154726111	154731111	.	.	.	.	0,0,0	152	14.3276	16.698	15.6914	20.3001	11	12	12	13	1.46642e-27	7.56154e-22	1.29907e-21	3.78428e-16	NA	NA,Cacna1e
1	185370113	185375113	1	185405154	185410154	.	.	.	.	0,0,0	118	33.3275	35.7201	35.7515	35.9573	15	15	15	15	4.4017e-07	5.51252e-07	5.73186e-07	5.90371e-07	NA,Eprs,Eprs	NA
1	16109105	16114105	1	16295457	16300457	.	.	.	.	0,0,0	88	20.1619	15.9445	22.13	18.4676	13	12	13	12	2.52018e-15	1.10722e-20	3.69536e-15	1.74997e-20	NA,Rdh10,Rpl7	NA
1	50961312	50966312	1	51329133	51334133	.	.	.	.	0,0,0	126	11.709	11.2393	14.9118	13.0623	10	10	11	11	3.16238e-32	1.4055e-32	3.63331e-26	3.96515e-26	NA	NA,9330175M20Rik
1	90059610	90064610	1	90588997	90593997	.	.	.	.	0,0,0	104	9.84269	9.05166	10.1351	14.3861	9	9	10	11	2.63692e-38	8.43986e-39	3.36403e-32	3.96515e-26	NA	NA,Cops8
1	131995915	132000915	1	132044052	132049052	.	.	.	.	0,0,0	92	37.0227	41.3142	39.9236	39.4014	15	16	16	16	1.62885e-06	0.00297397	0.00315059	0.00336425	NA,Elk4	NA
1	135168365	135173365	1	135367922	135372922	.	.	.	.	0,0,0	128	12.979	12.0466	13.8794	14.0549	11	10	11	11	3.33174e-26	1.4055e-32	3.63331e-26	3.96515e-26	NA,Gpr37l1	NA,Shisa4
1	54828812	54833812	1	54926155	54931155	.	.	.	.	0,0,0	78	12.677	15.2221	17.6246	16.4967	11	11	12	12	6.86325e-25	4.02615e-25	2.72783e-19	2.32609e-19	NA	NA,Ankrd44
1	88422537	88427537	1	88706262	88711262	.	.	.	.	0,0,0	128	22.6793	23.7957	34.4325	38.3504	13	13	15	15	2.20095e-14	2.08985e-14	7.48298e-06	7.70693e-06	NA	NA,Arl4c
1	93429935	93434935	1	93493065	93498065	.	.	.	.	0,0,0	86	28.8752	30.898	31.3452	26.8614	14	14	15	14	7.38593e-10	9.23167e-10	7.48298e-06	1.1191e-09	NA,Hdlbp	NA
1	136292480	136297480	1	136455038	136460038	.	.	.	.	0,0,0	78	17.018	16.8427	21.0412	21.9623	12	12	13	13	2.02344e-19	1.51549e-19	3.10053e-14	3.09319e-14	NA	NA,Kif14
1	172139148	172144148	1	172310813	172315813	.	.	.	.	0,0,0	118	21.968	23.1439	19.2816	38.2767	13	13	12	15	2.20095e-14	2.08985e-14	2.72783e-19	7.70693e-06	NA,Dcaf8,Pex19,Pex19,Dcaf8,Dcaf8,Pex19,Pex19	NA,Igsf8
1	74640015	74645015	1	74757809	74762809	.	.	.	.	0,0,0	98	14.6951	14.6969	19.1158	17.6841	11	11	12	12	1.3617e-23	8.45689e-24	3.50858e-18	3.08612e-18	NA	NA,Wnt6,Prkag3
1	75484530	75489530	1	75554476	75559476	.	.	.	.	0,0,0	118	26.616	22.853	25.7542	34.7254	14	13	14	15	3.9216e-09	1.76e-13	5.77913e-09	2.60038e-05	NA,Tmem198,Chpf,Chpf	NA,Slc4a3,Slc4a3,Slc4a3
1	90650940	90655940	1	90839027	90844027	.	.	.	.	0,0,0	108	15.4982	15.4411	19.6298	17.7049	11	11	13	12	1.3617e-23	8.45689e-24	2.57185e-13	3.08612e-18	NA	NA,Col6a3,Col6a3
1	94030020	94035020	1	94073333	94078333	.	.	.	.	0,0,0	80	25.1585	25.846	25.6861	28.3838	14	14	14	14	3.9216e-09	4.92559e-09	5.77913e-09	5.94734e-09	NA,Neu4,Neu4	NA
1	127499583	127504583	1	127679047	127684047	.	.	.	.	0,0,0	84	11.0017	9.81134	16.0431	12.9369	10	9	12	11	3.34428e-29	2.26512e-35	3.50858e-18	1.68264e-23	NA	NA,Tmem163
1	135168021	135173021	1	135258294	135263294	.	.	.	.	0,0,0	124	19.7963	19.4737	22.5429	21.4076	13	12	13	13	1.85227e-13	1.96311e-18	2.57185e-13	2.53428e-13	NA,Gpr37l1	NA,Elf3,Elf3
1	161996664	162001664	1	162271693	162276693	.	.	.	.	0,0,0	96	12.5618	18.6074	38.3546	20.2714	11	12	15	13	1.3617e-23	1.96311e-18	2.52089e-05	2.53428e-13	NA,2810442N19Rik	NA
1	165777688	165782688	1	166150000	166155000	.	.	.	.	0,0,0	122	10.407	6.79743	9.54466	12.3024	10	8	9	10	3.34428e-29	0	4.1056e-35	4.06925e-29	NA,Cd247,Cd247,Cd247,Cd247,Cd247	NA
1	169667110	169672110	1	169917043	169922043	.	.	.	.	0,0,0	82	13.2397	12.2668	16.4002	14.9374	11	10	12	11	1.3617e-23	1.51657e-29	3.50858e-18	1.68264e-23	NA,Rgs5,Rgs5	NA,Ccdc190,Ccdc190
1	21209953	21214953	1	21273175	21278175	.	.	.	.	0,0,0	96	17.5733	17.69	17.2485	17.113	12	12	12	12	3.16643e-17	2.48123e-17	4.30378e-17	3.79107e-17	NA,Tmem14a,Tmem14a	NA
1	34116227	34121227	1	34163105	34168105	.	.	.	.	0,0,0	106	22.9976	21.6537	24.6254	21.6603	13	13	14	13	1.48586e-12	1.41023e-12	2.95884e-08	2.00414e-12	NA,Mir6896	NA,Dst
1	58155369	58160369	1	58271529	58276529	.	.	.	.	0,0,0	108	16.4081	16.3056	22.5411	16.2316	12	12	13	12	3.16643e-17	2.48123e-17	2.03283e-12	3.79107e-17	NA	NA,Aox2
1	74959180	74964180	1	75009960	75014960	.	.	.	.	0,0,0	110	25.6734	28.4834	26.7043	36.6414	14	14	14	15	2.00884e-08	2.51807e-08	2.95884e-08	8.46979e-05	NA,Ihh,Ihh	NA
1	92952497	92957497	1	93009985	93014985	.	.	.	.	0,0,0	76	20.3258	20.7072	20.8075	20.6718	13	13	13	13	1.48586e-12	1.41023e-12	2.03283e-12	2.00414e-12	NA,9430060I03Rik	NA,Aqp12,Aqp12
1	161398972	161403972	1	161687918	161692918	.	.	.	.	0,0,0	104	17.7176	17.992	24.6719	17.484	12	12	14	12	3.16643e-17	2.48123e-17	2.95884e-08	3.79107e-17	NA,Tnfsf4	NA
1	165778784	165783784	1	165852499	165857499	.	.	.	.	0,0,0	74	15.006	14.7417	17.4479	13.2999	11	11	12	11	2.57763e-22	1.65255e-22	4.30378e-17	3.1522e-22	NA,Cd247,Cd247,Cd247,Cd247,Cd247	NA
1	168379010	168384010	1	168422017	168427017	.	.	.	.	0,0,0	94	27.3037	23.8375	26.8937	30.8877	14	13	14	14	2.00884e-08	1.41023e-12	2.95884e-08	3.01569e-08	NA	NA,Pbx1,Pbx1,Pbx1,Pbx1
1	171163686	171168686	1	171212402	171217402	.	.	.	.	0,0,0	98	33.4009	36.8474	36.0002	43.4526	15	15	15	16	6.29043e-05	7.80087e-05	8.16251e-05	0.0333642	NA,Mpz,Mpz	NA,Apoa2,Nr1i3,Nr1i3,Apoa2,Apoa2,Nr1i3,Apoa2,Apoa2,Tomm40l
1	180265792	180270792	1	180413055	180418055	.	.	.	.	0,0,0	112	18.2361	16.3091	22.7296	19.8798	12	12	13	13	3.16643e-17	2.48123e-17	2.03283e-12	2.00414e-12	NA,Psen2	NA
1	185439895	185444895	1	185495102	185500102	.	.	.	.	0,0,0	80	33.06	39.8275	33.5794	45.6678	15	16	15	16	6.29043e-05	0.0275145	8.16251e-05	0.0333642	NA,Gm2061,9630028B13Rik,Slc30a10	NA,5033404E19Rik
1	59246121	59251121	1	59619617	59624617	.	.	.	.	0,0,0	94	18.62	16.8025	21.6081	22.3491	12	12	13	13	3.73183e-16	2.96887e-16	1.51501e-11	1.49749e-11	NA,Als2,Als2,Als2,Cdk15,Cdk15	NA
1	73897529	73902529	1	74127483	74132483	.	.	.	.	0,0,0	80	11.9268	10.5966	13.5132	10.3701	10	10	11	10	3.03745e-26	1.42549e-26	5.78231e-21	3.79399e-26	NA	NA,Tns1,Tns1,Rufy4,Rufy4
1	75339988	75344988	1	75445217	75450217	.	.	.	.	0,0,0	188	20.8851	19.5871	27.917	19.7832	13	13	14	13	1.1076e-11	1.06437e-11	1.40189e-07	1.49749e-11	NA	NA,Asic4,Gmppa,Gmppa,Gmppa,Gmppa
1	78534238	78539238	1	78662814	78667814	.	.	.	.	0,0,0	116	17.3013	20.3787	28.0957	21.1076	12	13	14	13	3.73183e-16	1.06437e-11	1.40189e-07	1.49749e-11	NA	NA,Acsl3,Utp14b,Acsl3,Acsl3,Utp14b
1	128366904	128371904	1	128825757	128830757	.	.	.	.	0,0,0	90	15.2507	12.8148	13.4168	22.8401	11	11	11	13	4.67123e-21	3.01502e-21	5.78231e-21	1.49749e-11	NA,Mcm6,Mcm6	NA
1	134147532	134152532	1	134327115	134332115	.	.	.	.	0,0,0	102	21.2452	19.7901	19.8058	25.5845	13	13	13	14	1.1076e-11	1.06437e-11	1.51501e-11	1.44358e-07	NA	NA,Ppfia4
1	135715013	135720013	1	135786215	135791215	.	.	.	.	0,0,0	100	13.5127	13.731	22.1879	20.2233	11	11	13	13	4.67123e-21	3.01502e-21	1.51501e-11	1.49749e-11	NA,Csrp1,Csrp1,Csrp1	NA,Tnni1,Tnni1
1	151564991	151569991	1	151700904	151705904	.	.	.	.	0,0,0	96	17.019	15.514	15.466	21.208	12	11	11	13	3.73183e-16	3.01502e-21	5.78231e-21	1.49749e-11	NA,Fam129a	NA
1	152789917	152794917	1	152834990	152839990	.	.	.	.	0,0,0	92	39.0892	41.698	42.78	38.7871	16	16	16	15	0.0480183	0.0528797	0.0632037	0.000259571	NA,Ncf2	NA
1	171410033	171415033	1	171475191	171480191	.	.	.	.	0,0,0	72	24.0908	26.5816	28.184	36.1685	13	14	14	15	1.1076e-11	1.21312e-07	1.40189e-07	0.000259571	NA,Usf1,Tstd1,Usf1,Usf1,Usf1	NA
1	172324951	172329951	1	172360007	172365007	.	.	.	.	0,0,0	112	29.7422	25.1796	32.4453	28.1946	14	14	15	14	9.70368e-08	1.21312e-07	0.000251392	1.44358e-07	NA,Kcnj9,Kcnj9,Kcnj10	NA,Pigm
1	191836953	191841953	1	191907975	191912975	.	.	.	.	0,0,0	94	30.3073	27.4233	43.5349	24.6667	14	14	16	14	9.70368e-08	1.21312e-07	0.0632037	1.44358e-07	NA	NA,Slc30a1,1700034H15Rik
1	193329959	193334959	1	193376194	193381194	.	.	.	.	0,0,0	86	35.366	32.6878	38.4488	32.33	15	15	15	15	0.000192337	0.000235937	0.000251392	0.000259571	NA	NA,Camk1g
1	59316889	59321889	1	59478779	59483779	.	.	.	.	0,0,0	78	11.642	13.5431	17.4276	17.4082	10	11	12	12	8.21769e-25	5.22461e-20	5.3887e-15	4.83549e-15	NA	NA,Fzd7
1	178525020	178530020	1	179474998	179479998	.	.	.	.	0,0,0	102	6.6842	7.71508	9.59331	8.26813	8	8	9	9	1.27676e-35	6.88399e-36	4.26282e-30	5.63785e-30	NA,Kif26b	NA
1	189730164	189735164	1	189777529	189782529	.	.	.	.	0,0,0	70	18.7213	24.4616	29.115	34.7166	12	13	14	15	4.04596e-15	7.40924e-11	6.21803e-07	0.000740405	NA,Ptpn14	NA
1	36543665	36548665	1	36682294	36687294	.	.	.	.	0,0,0	106	16.5367	17.8096	26.6542	19.2061	12	12	14	12	4.16141e-14	3.44077e-14	2.63979e-06	5.07391e-14	NA,Sema4c,Ankrd39,Ankrd23,Ankrd39,Sema4c,Ankrd39,Ankrd23,Sema4c	NA,Cox5b,Fam178b,Fam178b
1	136113742	136118742	1	136167496	136172496	.	.	.	.	0,0,0	74	22.2202	21.9496	19.6716	23.4952	13	13	13	13	5.18257e-10	4.9858e-10	7.08045e-10	7.04749e-10	NA,Gm15850,Gm15850,Gm15850,Gm15850	NA
1	39611669	39616669	1	39648372	39653372	.	.	.	.	0,0,0	78	29.5727	33.1309	30.7037	30.841	14	15	14	14	7.55894e-06	0.00432547	1.04601e-05	1.06657e-05	NA	NA,Creg2
1	63180020	63185020	1	63247583	63252583	.	.	.	.	0,0,0	82	19.5109	22.1276	27.0898	21.2738	12	13	14	13	4.03102e-13	3.18063e-09	1.04601e-05	4.41534e-09	NA,Ndufs1,Ndufs1,Ndufs1,Ndufs1,Eef1b2,Snora41	NA
1	88559004	88564004	1	88696999	88701999	.	.	.	.	0,0,0	96	21.0384	16.7582	17.6431	21.2091	13	12	12	13	3.24053e-09	3.41759e-13	5.45472e-13	4.41534e-09	NA,Gm19589	NA,Arl4c
1	111860010	111865010	1	112375019	112380019	.	.	.	.	0,0,0	90	6.35276	7.22481	9.34959	8.61118	8	8	9	9	3.90637e-32	2.6304e-32	7.23688e-27	8.55257e-27	NA,Dsel	NA
1	127203009	127208009	1	127404981	127409981	.	.	.	.	0,0,0	110	16.6789	17.3196	22.9983	15.2492	12	12	13	11	4.03102e-13	3.41759e-13	4.52821e-09	2.37205e-17	NA,Mgat5	NA
1	143805512	143810512	1	144001043	144006043	.	.	.	.	0,0,0	94	13.0882	14.5714	17.0559	22.0672	11	11	12	13	2.01995e-17	1.3313e-17	5.45472e-13	4.41534e-09	NA	NA,Rgs2
1	171119014	171124014	1	171215057	171220057	.	.	.	.	0,0,0	102	14.9146	13.7346	23.7348	16.5093	11	11	13	12	2.01995e-17	1.3313e-17	4.52821e-09	5.09776e-13	NA,Cfap126	NA,Apoa2,Nr1i3,Nr1i3,Apoa2,Apoa2,Nr1i3,Apoa2,Apoa2,Tomm40l
1	171317517	171322517	1	171357479	171362479	.	.	.	.	0,0,0	90	18.6394	18.4559	15.4271	22.5992	12	12	11	13	4.03102e-13	3.41759e-13	2.35993e-17	4.41534e-09	NA,Dedd,Dedd,Dedd,Dedd,Dedd,Dedd	NA,Pfdn2,Nit1,Pfdn2,Nit1,Nectin4,Nectin4,Klhdc9
1	64619978	64624978	1	64691914	64696914	.	.	.	.	0,0,0	72	19.6983	19.3925	24.8144	22.1948	13	12	14	13	1.90236e-08	3.21847e-12	3.90146e-05	2.63034e-08	NA,Mettl21a	NA,Ccnyl1,2810408I11Rik
1	90059196	90064196	1	90197499	90202499	.	.	.	.	0,0,0	102	19.2775	18.4872	24.131	19.0918	12	12	13	12	3.78244e-12	3.21847e-12	2.68023e-08	4.72043e-12	NA	NA,Ackr3,Ackr3
1	106165000	106170000	1	106387896	106392896	.	.	.	.	0,0,0	80	17.131	14.6915	16.6803	21.3798	12	11	12	13	3.78244e-12	1.97298e-16	5.00855e-12	2.63034e-08	NA,Gm20753,Phlpp1	NA
1	184264988	184269988	1	184737752	184742752	.	.	.	.	0,0,0	74	11.6486	10.8547	16.6	12.5151	10	10	12	11	1.03361e-20	5.65586e-21	5.00855e-12	3.37258e-16	NA	NA,Hlx
1	34637499	34642499	1	34700069	34705069	.	.	.	.	0,0,0	80	15.9837	16.7251	13.7328	19.102	12	12	11	12	3.26754e-11	2.80429e-11	4.6767e-15	4.11102e-11	NA,AA619741	NA
1	43295072	43300072	1	43443960	43448960	.	.	.	.	0,0,0	62	21.2392	18.929	22.8373	26.035	13	12	13	14	1.0447e-07	2.80429e-11	1.48217e-07	0.000138322	NA	NA,Nck2
1	45820827	45825827	1	46016237	46021237	.	.	.	.	0,0,0	122	11.7087	8.81531	8.94152	11.9422	10	9	9	10	2.22541e-19	3.83774e-24	8.85793e-24	2.77374e-19	NA	NA,Stk-ps2,Stk-ps2
1	75124018	75129018	1	75246996	75251996	.	.	.	.	0,0,0	90	17.7761	10.7869	20.968	10.6844	12	10	13	10	3.26754e-11	1.23529e-19	1.48217e-07	2.77374e-19	NA,Slc23a3	NA,Dnajb2,Dnajb2,Dnajb2,Dnajb2,Dnajb2,Ptprn,Ptprn
1	89071124	89076124	1	89188001	89193001	.	.	.	.	0,0,0	62	18.206	15.8178	17.8652	24.3455	12	12	12	13	3.26754e-11	2.80429e-11	4.30814e-11	1.44651e-07	NA,Sh3bp4	NA
1	91178967	91183967	1	91235008	91240008	.	.	.	.	0,0,0	80	29.8132	31.7363	30.0536	31.1739	14	15	14	15	9.71061e-05	0.0213931	0.000135863	0.0264397	NA,Ramp1,Ramp1,Ramp1	NA,Ube2f,Ube2f,Ube2f,Ube2f,Ube2f,Ube2f
1	106511680	106516680	1	106715015	106720015	.	.	.	.	0,0,0	62	14.34	12.736	12.8915	21.0937	11	11	11	13	3.98772e-15	2.72585e-15	4.6767e-15	1.44651e-07	NA	NA,Bcl2,Bcl2
1	150403560	150408560	1	150444245	150449245	.	.	.	.	0,0,0	72	23.6277	23.0413	22.8591	26.7892	13	13	13	14	1.0447e-07	1.05436e-07	1.48217e-07	0.000138322	NA,BC003331,Tpr,BC003331,BC003331	NA
1	156415718	156420718	1	156535703	156540703	.	.	.	.	0,0,0	68	13.1275	12.156	13.143	14.7423	11	10	11	11	3.98772e-15	1.23529e-19	4.6767e-15	4.54487e-15	NA,Axdnd1	NA
1	179504556	179509556	1	179621354	179626354	.	.	.	.	0,0,0	76	19.0712	12.3023	16.7103	15.1943	12	10	12	11	3.26754e-11	1.23529e-19	4.30814e-11	4.54487e-15	NA,Smyd3	NA
1	36150086	36155086	1	36205025	36210025	.	.	.	.	0,0,0	62	24.2107	25.8049	38.853	24.4277	13	14	15	13	5.37625e-07	0.000387068	0.0533244	7.49769e-07	NA,Mir6897	NA
1	62715020	62720020	1	62763901	62768901	.	.	.	.	0,0,0	66	31.7192	28.6734	38.7097	22.1341	15	14	15	13	0.0402183	0.000387068	0.0533244	7.49769e-07	NA,Nrp2,Nrp2,Nrp2,Nrp2,Nrp2,Nrp2	NA
1	87108348	87113348	1	87160041	87165041	.	.	.	.	0,0,0	82	16.7389	21.7503	31.8236	10.3947	12	13	15	10	2.66402e-10	5.50919e-07	0.0533244	5.33019e-18	NA,Akp3,Alpi	NA,Ecel1,Ecel1
1	89458327	89463327	1	89572529	89577529	.	.	.	.	0,0,0	80	19.1887	17.3795	17.5416	20.2439	12	12	12	13	2.66402e-10	2.30254e-10	3.45156e-10	7.49769e-07	NA,Agap1,Agap1	NA
1	127201262	127206262	1	127453795	127458795	.	.	.	.	0,0,0	112	16.2838	14.9376	23.4098	16.673	12	11	13	12	2.66402e-10	3.52283e-14	7.67142e-07	3.36723e-10	NA,Mgat5	NA
1	131993114	131998114	1	132108747	132113747	.	.	.	.	0,0,0	66	12.3272	10.2192	14.7078	12.6187	10	10	11	11	4.33871e-18	2.48066e-18	5.9208e-14	5.78118e-14	NA,Elk4	NA
1	132161997	132166997	1	132302014	132307014	.	.	.	.	0,0,0	126	17.4655	18.318	18.7892	30.6207	12	12	12	14	2.66402e-10	2.30254e-10	3.45156e-10	0.000448046	NA	NA,Nuak2,Nuak2,Klhdc8a
1	151074399	151079399	1	151348111	151353111	.	.	.	.	0,0,0	80	17.5014	19.9926	26.4203	22.4549	12	13	14	13	2.66402e-10	5.50919e-07	0.000446413	7.49769e-07	NA	NA,Ivns1abp,Ivns1abp,Ivns1abp,Ivns1abp,Ivns1abp
1	152534991	152539991	1	152620693	152625693	.	.	.	.	0,0,0	82	23.6773	24.6203	25.0303	37.5382	13	14	14	15	5.37625e-07	0.000387068	0.000446413	0.055271	NA	NA,Rgl1
1	155098999	155103999	1	155211008	155216008	.	.	.	.	0,0,0	82	16.4485	16.6257	17.8332	24.8825	12	12	12	14	2.66402e-10	2.30254e-10	3.45156e-10	0.000448046	NA,Ier5	NA
1	172159927	172164927	1	172245000	172250000	.	.	.	.	0,0,0	60	20.5729	21.1261	23.8727	29.5405	13	13	13	14	5.37625e-07	5.50919e-07	7.67142e-07	0.000448046	NA,Dcaf8,Dcaf8,Dcaf8	NA,Atp1a4
1	180339935	180344935	1	180393251	180398251	.	.	.	.	0,0,0	74	31.5532	32.2582	32.5185	34.2693	15	15	15	15	0.0402183	0.0441069	0.0533244	0.055271	NA,Itpkb,Gm5069	NA
1	183147563	183152563	1	183224183	183229183	.	.	.	.	0,0,0	64	25.556	26.5791	27.4354	30.0125	14	14	14	14	0.000315754	0.000387068	0.000446413	0.000448046	NA,Disp1	NA,Disp1,Disp1,Disp1
1	191092460	191097460	1	191177462	191182462	.	.	.	.	0,0,0	72	21.939	20.1916	21.2163	20.3772	13	13	13	13	5.37625e-07	5.50919e-07	7.67142e-07	7.49769e-07	NA,Batf3	NA,Atf3
1	52000577	52005577	1	52089987	52094987	.	.	.	.	0,0,0	62	18.0593	14.866	14.3903	16.9129	12	11	11	12	2.00439e-09	4.17573e-13	6.89118e-13	2.50048e-09	NA,Stat4	NA
1	63949995	63954995	1	64444962	64449962	.	.	.	.	0,0,0	64	8.56342	9.05598	9.47573	12.362	9	9	9	10	6.13895e-21	3.36843e-21	7.61813e-21	9.55036e-17	NA,Gm13749	NA
1	90970399	90975399	1	91099976	91104976	.	.	.	.	0,0,0	94	19.9302	20.2038	28.106	21.2766	13	13	14	13	2.60047e-06	2.69855e-06	0.00137067	3.61933e-06	NA,Rab17,Rab17	NA
1	161869974	161874974	1	161962471	161967471	.	.	.	.	0,0,0	76	14.4775	12.3781	10.6376	20.2183	11	10	10	13	5.94778e-13	4.6361e-17	8.5644e-17	3.61933e-06	NA,Suco,Suco,Suco,Suco,Suco	NA,Pigc,Pigc,4930558K02Rik,4930558K02Rik
1	170633551	170638551	1	170835030	170840030	.	.	.	.	0,0,0	68	9.87773	7.85234	9.49543	7.86192	10	9	9	9	7.74997e-17	3.36843e-21	7.61813e-21	7.28682e-21	NA,Olfml2b	NA
1	191389993	191394993	1	191561236	191566236	.	.	.	.	0,0,0	88	14.8793	16.3062	19.9714	23.3433	11	12	13	13	5.94778e-13	1.74819e-09	3.67658e-06	3.61933e-06	NA,Ppp2r5a	NA,Dtl,Ints7,Dtl,Ints7,Ints7
1	51465718	51470718	1	51597123	51602123	.	.	.	.	0,0,0	72	12.7426	12.8673	12.2655	15.7766	11	11	10	12	6.51517e-12	4.76102e-12	1.56045e-15	1.78741e-08	NA,Nabp1,Nabp1,Nabp1	NA,Gm17767
1	74519996	74524996	1	74573286	74578286	.	.	.	.	0,0,0	88	25.4428	30.1269	27.5549	29.956	14	14	14	14	0.00268484	0.0032834	0.00385165	0.00385202	NA	NA,Zfp142,Zfp142,Bcs1l,Bcs1l
1	87096643	87101643	1	87188309	87193309	.	.	.	.	0,0,0	82	23.7854	20.7749	22.6439	20.6219	13	13	13	13	1.15321e-05	1.21293e-05	1.63764e-05	1.61125e-05	NA,Alppl2,Alpi	NA,Prss56,Chrnd
1	88467418	88472418	1	88555007	88560007	.	.	.	.	0,0,0	86	17.6197	18.3921	20.9102	21.2372	12	12	13	13	1.40341e-08	1.23176e-08	1.63764e-05	1.61125e-05	NA	NA,Gm19589
1	134636371	134641371	1	134837718	134842718	.	.	.	.	0,0,0	84	20.7467	20.6062	27.203	24.885	13	13	14	14	1.15321e-05	1.21293e-05	0.00385165	0.00385202	NA,Syt2	NA
1	153892150	153897150	1	154117846	154122846	.	.	.	.	0,0,0	76	13.9522	15.3628	20.6868	15.9502	11	11	13	12	6.51517e-12	4.76102e-12	1.63764e-05	1.78741e-08	NA,Glul,Teddm1a,Mir8114	NA
1	158666995	158671995	1	158948984	158953984	.	.	.	.	0,0,0	70	12.5359	10.9819	12.3204	16.3392	11	10	10	12	6.51517e-12	8.20714e-16	1.56045e-15	1.78741e-08	NA	NA,Pappa2
1	158714973	158719973	1	158951251	158956251	.	.	.	.	0,0,0	82	14.5377	14.9643	15.5748	18.3404	11	11	12	12	6.51517e-12	4.76102e-12	1.82403e-08	1.78741e-08	NA	NA,Pappa2
1	169957835	169962835	1	170136637	170141637	.	.	.	.	0,0,0	56	16.031	15.9755	17.0279	21.708	12	12	12	13	1.40341e-08	1.23176e-08	1.82403e-08	1.61125e-05	NA,Hsd17b7,3110045C21Rik	NA
1	191581418	191586418	1	191814272	191819272	.	.	.	.	0,0,0	70	13.9392	8.33963	7.52168	13.4962	11	9	8	11	6.51517e-12	9.35612e-20	1.36833e-23	7.6069e-12	NA,Dtl,Ints7,Dtl,Ints7,Ints7	NA,Nek2
1	9621248	9626248	1	9688829	9693829	.	.	.	.	0,0,0	58	11.9686	13.1065	15.3008	16.5616	10	11	11	12	2.1583e-14	5.00592e-11	7.81963e-11	1.17076e-07	NA,2610203C22Rik	NA,Mybl1,Mybl1
1	55086949	55091949	1	55130022	55135022	.	.	.	.	0,0,0	82	16.0603	17.4915	18.1882	17.016	12	12	12	12	9.15139e-08	8.14775e-08	1.20339e-07	1.17076e-07	NA,Hspd1,Hspe1,Hspd1	NA,Mob4,Mob4
1	64727638	64732638	1	64916934	64921934	.	.	.	.	0,0,0	76	10.2703	11.606	13.7753	13.3995	10	10	11	11	2.1583e-14	1.35574e-14	7.81963e-11	7.76987e-11	NA,Fzd5,Fzd5	NA
1	72866980	72871980	1	73822996	73827996	.	.	.	.	0,0,0	68	8.67938	8.40085	14.653	9.47293	9	9	11	9	3.97435e-18	2.36209e-18	7.81963e-11	4.79506e-18	NA,Igfbp5	NA
1	86371246	86376246	1	86427450	86432450	.	.	.	.	0,0,0	90	21.2596	17.5255	20.7514	20.6074	13	12	13	13	4.76276e-05	8.14775e-08	6.72711e-05	6.7155e-05	NA,Nmur1,C130036L24Rik,Ncl	NA,Tex44
1	92647970	92652970	1	92830039	92835039	.	.	.	.	0,0,0	80	16.6229	15.0432	14.9541	26.0281	12	11	11	14	9.15139e-08	5.00592e-11	7.81963e-11	0.0100593	NA,Cops9,Cops9,Otos	NA,Gpc1
1	93012543	93017543	1	93074956	93079956	.	.	.	.	0,0,0	60	20.738	20.9722	24.8561	24.1368	13	13	14	13	4.76276e-05	5.0634e-05	0.0101081	6.7155e-05	NA,Aqp12,Aqp12	NA,Kif1a
1	106541663	106546663	1	106718365	106723365	.	.	.	.	0,0,0	82	13.4908	15.8367	16.8913	24.4789	11	12	12	13	6.73791e-11	8.14775e-08	1.20339e-07	6.7155e-05	NA,Mir3473f	NA,Bcl2,Bcl2
1	134360087	134365087	1	134450037	134455037	.	.	.	.	0,0,0	54	15.4111	14.6096	20.9198	12.321	11	11	13	10	6.73791e-11	5.00592e-11	6.72711e-05	2.57379e-14	NA,Tmem183a,Tmem183a,Tmem183a	NA,Klhl12,Klhl12
1	162583703	162588703	1	162656326	162661326	.	.	.	.	0,0,0	54	12.0538	13.4376	14.7586	22.4632	10	11	11	13	2.1583e-14	5.00592e-11	7.81963e-11	6.7155e-05	NA	NA,Myocos
1	162894991	162899991	1	163061115	163066115	.	.	.	.	0,0,0	114	14.2163	12.419	16.3673	14.3931	11	11	12	11	6.73791e-11	5.00592e-11	1.20339e-07	7.76987e-11	NA,Fmo2,Fmo2,Fmo2	NA
1	170918325	170923325	1	170969993	170974993	.	.	.	.	0,0,0	76	14.9515	23.4584	30.8114	8.12745	11	13	14	9	6.73791e-11	5.0634e-05	0.0101081	4.79506e-18	NA,Fcrla,Fcrla,Fcrla,Fcrlb	NA,Fcgr2b,Fcgr2b
1	173326245	173331245	1	173397483	173402483	.	.	.	.	0,0,0	56	16.9379	13.796	15.8407	14.7739	12	11	12	11	9.15139e-08	5.00592e-11	1.20339e-07	7.76987e-11	NA,Ackr1	NA
1	178525011	178530011	1	179137506	179142506	.	.	.	.	0,0,0	62	8.74299	8.67611	11.0506	7.8443	9	9	10	9	3.97435e-18	2.36209e-18	2.54266e-14	4.79506e-18	NA,Kif26b	NA
1	180176239	180181239	1	180216246	180221246	.	.	.	.	0,0,0	90	21.5563	21.7928	19.921	22.0713	13	13	13	13	4.76276e-05	5.0634e-05	6.72711e-05	6.7155e-05	NA,Coq8a	NA
1	182024937	182029937	1	182108311	182113311	.	.	.	.	0,0,0	82	17.0091	14.3771	14.376	17.3953	12	11	11	12	9.15139e-08	5.00592e-11	7.81963e-11	1.17076e-07	NA,Enah,Enah,Enah,Enah	NA,Srp9
1	189697502	189702502	1	189876234	189881234	.	.	.	.	0,0,0	76	21.5629	19.8928	25.757	20.4603	13	13	14	13	4.76276e-05	5.0634e-05	0.0101081	6.7155e-05	NA,Cenpf	NA
1	192187485	192192485	1	192711243	192716243	.	.	.	.	0,0,0	72	8.40521	7.33838	9.62243	6.21673	9	8	9	7	3.97435e-18	2.84833e-22	4.66192e-18	2.07411e-26	NA,Kcnh1,Kcnh1	NA
1	33673314	33678314	1	33735657	33740657	.	.	.	.	0,0,0	76	20.5261	21.4648	24.3248	23.9705	13	13	13	13	0.000179309	0.00019367	0.000257224	0.000255018	NA,1700001G17Rik,Prim2	NA
1	35835025	35840025	1	36061234	36066234	.	.	.	.	0,0,0	66	15.213	13.8256	16.8564	19.7697	11	11	12	13	6.3594e-10	4.78739e-10	7.20484e-07	0.000255018	NA	NA,Hs6st1
1	37676702	37681702	1	37866644	37871644	.	.	.	.	0,0,0	58	11.7901	11.1258	13.1989	12.6413	10	10	11	11	3.05839e-13	1.9941e-13	7.27088e-10	7.20702e-10	NA	NA,Lipt1,Tsga10,Tsga10,Tsga10,Tsga10
1	40799996	40804996	1	40839999	40844999	.	.	.	.	0,0,0	78	18.7761	16.7677	21.9413	18.443	12	12	13	12	5.51969e-07	5.03044e-07	0.000257224	7.06697e-07	NA,Mfsd9,Tmem182	NA
1	59144928	59149928	1	59235014	59240014	.	.	.	.	0,0,0	52	18.4167	16.2847	14.3151	22.6994	12	12	11	13	5.51969e-07	5.03044e-07	7.27088e-10	0.000255018	NA,Mpp4	NA,Als2,Als2,Als2
1	59396182	59401182	1	59481240	59486240	.	.	.	.	0,0,0	52	13.9618	13.5948	14.8863	13.7488	11	11	11	11	6.3594e-10	4.78739e-10	7.27088e-10	7.20702e-10	NA	NA,Fzd7
1	82294989	82299989	1	82432489	82437489	.	.	.	.	0,0,0	52	14.1621	11.1313	8.26245	13.5106	11	10	9	11	6.3594e-10	1.9941e-13	1.03646e-16	7.20702e-10	NA,Irs1	NA
1	82792475	82797475	1	82837488	82842488	.	.	.	.	0,0,0	54	22.3764	21.4487	22.4941	22.6186	13	13	13	13	0.000179309	0.00019367	0.000257224	0.000255018	NA	NA,Agfg1,Agfg1,Agfg1
1	90905046	90910046	1	90955003	90960003	.	.	.	.	0,0,0	80	19.7455	18.2806	17.2924	29.5913	13	12	12	14	0.000179309	5.03044e-07	7.20484e-07	0.024324	NA,Mlph	NA,Rab17,Rab17,Prlh
1	93176221	93181221	1	93236231	93241231	.	.	.	.	0,0,0	86	16.6505	17.317	18.0413	15.0575	12	12	12	11	5.51969e-07	5.03044e-07	7.20484e-07	7.20702e-10	NA,Crocc2	NA,Sned1
1	127499998	127504998	1	127760891	127765891	.	.	.	.	0,0,0	72	10.071	8.82737	12.9207	12.8028	10	9	11	11	3.05839e-13	5.50705e-17	7.27088e-10	7.20702e-10	NA	NA,2900009J06Rik,Ccnt2
1	135314987	135319987	1	135364965	135369965	.	.	.	.	0,0,0	58	18.833	19.5729	20.2601	23.5215	12	13	13	13	5.51969e-07	0.00019367	0.000257224	0.000255018	NA,Timm17a,Timm17a,Timm17a,Lmod1	NA,Shisa4
1	140167221	140172221	1	140527779	140532779	.	.	.	.	0,0,0	68	6.7618	6.43132	7.83357	7.06584	8	8	8	8	1.40144e-20	9.88123e-21	2.13574e-20	1.62409e-20	NA,Cfh	NA
1	165583741	165588741	1	165751275	165756275	.	.	.	.	0,0,0	62	11.2104	11.2082	21.0375	12.8985	10	10	13	11	3.05839e-13	1.9941e-13	0.000257224	7.20702e-10	NA	NA,Creg1,Creg1
1	176521698	176526698	1	176560027	176565027	.	.	.	.	0,0,0	62	12.1159	16.6214	24.2186	7.5723	10	12	13	8	3.05839e-13	5.03044e-07	0.000257224	1.62409e-20	NA,Gm36536	NA
1	182557006	182562006	1	182658969	182663969	.	.	.	.	0,0,0	64	15.4556	12.8554	15.4451	11.8997	11	11	11	10	6.3594e-10	4.78739e-10	7.27088e-10	3.78336e-13	NA,Capn8,Capn8	NA
1	185416024	185421024	1	185506962	185511962	.	.	.	.	0,0,0	80	17.2617	15.2376	12.1448	25.3442	12	11	10	14	5.51969e-07	4.78739e-10	3.65489e-13	0.024324	NA	NA,5033404E19Rik
1	193255726	193260726	1	193320707	193325707	.	.	.	.	0,0,0	88	14.0304	14.5293	15.8261	13.8207	11	11	12	11	6.3594e-10	4.78739e-10	7.20484e-07	7.20702e-10	NA,G0s2,Hsd11b1	NA
1	14304996	14309996	1	14501999	14506999	.	.	.	.	0,0,0	60	10.3887	10.457	17.9797	9.42647	10	10	12	9	4.1614e-12	2.81e-12	3.96515e-06	2.18046e-15	NA,Eya1,Eya1,Eya1	NA
1	33890630	33895630	1	33961862	33966862	.	.	.	.	0,0,0	84	16.8189	16.0247	16.5422	17.7038	12	12	12	12	3.0288e-06	2.8171e-06	3.96515e-06	3.89698e-06	NA,Bend6,Bend6	NA
1	36317010	36322010	1	36493501	36498501	.	.	.	.	0,0,0	50	11.9152	9.14051	11.7372	10.9381	10	9	10	10	4.1614e-12	1.16004e-15	5.00644e-12	4.96663e-12	NA,Arid5a,Arid5a,Arid5a,Arid5a,Arid5a,Arid5a	NA
1	59486978	59491978	1	59575042	59580042	.	.	.	.	0,0,0	60	12.0519	11.8096	15.8225	17.0378	10	10	12	12	4.1614e-12	2.81e-12	3.96515e-06	3.89698e-06	NA,Fzd7	NA
1	74766682	74771682	1	74806680	74811680	.	.	.	.	0,0,0	82	24.6826	24.836	24.0159	24.3596	14	14	13	13	0.0381449	0.0444927	0.000899735	0.000891467	NA,Wnt6	NA
1	75474991	75479991	1	75594997	75599997	.	.	.	.	0,0,0	94	18.0458	11.0791	16.5184	13.9953	12	10	12	11	3.0288e-06	2.81e-12	3.96515e-06	6.24829e-09	NA,Tmem198,Chpf,Chpf	NA
1	88444940	88449940	1	88710009	88715009	.	.	.	.	0,0,0	128	18.9403	18.5598	14.8861	23.4599	12	12	11	13	3.0288e-06	2.8171e-06	6.27638e-09	0.000891467	NA	NA,Arl4c
1	89649584	89654584	1	89939164	89944164	.	.	.	.	0,0,0	86	11.0478	8.4202	8.9308	13.4967	10	9	9	11	4.1614e-12	1.16004e-15	2.19573e-15	6.24829e-09	NA	NA,Gbx2
1	90647005	90652005	1	90950032	90955032	.	.	.	.	0,0,0	80	10.3578	10.2601	13.7558	11.0434	10	10	11	10	4.1614e-12	2.81e-12	6.27638e-09	4.96663e-12	NA	NA,Prlh
1	90924924	90929924	1	90959973	90964973	.	.	.	.	0,0,0	80	21.2823	23.0213	21.6182	22.7183	13	13	13	13	0.000624846	0.000684552	0.000899735	0.000891467	NA,Mlph	NA,Rab17,Rab17,Prlh
1	92690731	92695731	1	92830004	92835004	.	.	.	.	0,0,0	76	11.3991	11.2373	13.7114	13.7363	10	10	11	11	4.1614e-12	2.81e-12	6.27638e-09	6.24829e-09	NA	NA,Gpc1
1	106613385	106618385	1	106709954	106714954	.	.	.	.	0,0,0	68	18.2991	16.9846	13.3006	21.3656	12	12	11	13	3.0288e-06	2.8171e-06	6.27638e-09	0.000891467	NA	NA,Bcl2,Bcl2
1	118381644	118386644	1	118458287	118463287	.	.	.	.	0,0,0	62	22.2583	24.316	26.3327	28.6346	13	13	14	14	0.000624846	0.000684552	0.0539207	0.0540063	NA,Clasp1,Clasp1,Clasp1,Clasp1,Clasp1,Clasp1,Clasp1,Clasp1,Clasp1,Clasp1,Clasp1,Clasp1,Clasp1,Clasp1,Clasp1,Clasp1,Clasp1,Clasp1,Clasp1,Clasp1	NA,2900060B14Rik
1	133733763	133738763	1	134046225	134051225	.	.	.	.	0,0,0	112	15.8561	15.7112	13.5166	25.5752	12	12	11	14	3.0288e-06	2.8171e-06	6.27638e-09	0.0540063	NA,Mir6903	NA,Fmod
1	133905028	133910028	1	133964901	133969901	.	.	.	.	0,0,0	68	23.1665	22.8619	23.1558	24.4964	13	13	13	13	0.000624846	0.000684552	0.000899735	0.000891467	NA,Optc,Prelp,Optc,Optc,Optc	NA
1	134644982	134649982	1	134708290	134713290	.	.	.	.	0,0,0	76	21.883	19.1925	23.1623	25.8952	13	12	13	14	0.000624846	2.8171e-06	0.000899735	0.0540063	NA,Syt2	NA,Syt2
1	135260844	135265844	1	135362510	135367510	.	.	.	.	0,0,0	58	14.7839	12.9591	13.8671	15.6152	11	11	11	12	5.53943e-09	4.19014e-09	6.27638e-09	3.89698e-06	NA,Elf3,Elf3	NA,Shisa4
1	156554987	156559987	1	156615046	156620046	.	.	.	.	0,0,0	70	21.7077	23.6795	21.6666	24.9992	13	13	13	14	0.000624846	0.000684552	0.000899735	0.0540063	NA,Abl2,Abl2	NA
1	161401221	161406221	1	161732512	161737512	.	.	.	.	0,0,0	60	12.0449	13.5817	16.0476	17.0739	10	11	12	12	4.1614e-12	4.19014e-09	3.96515e-06	3.89698e-06	NA,Tnfsf4	NA
1	162543727	162548727	1	162663746	162668746	.	.	.	.	0,0,0	78	19.1147	16.3191	15.4683	26.4144	12	12	11	14	3.0288e-06	2.8171e-06	6.27638e-09	0.0540063	NA,Mettl13	NA,Myocos
1	164008779	164013779	1	164134974	164139974	.	.	.	.	0,0,0	86	10.1675	10.4709	9.7408	13.3953	10	10	9	11	4.1614e-12	2.81e-12	2.19573e-15	6.24829e-09	NA	NA,Gm16548,F5
1	172044999	172049999	1	172092509	172097509	.	.	.	.	0,0,0	80	21.3395	23.8224	27.7235	25.8328	13	13	14	14	0.000624846	0.000684552	0.0539207	0.0540063	NA,Nhlh1	NA,Ncstn,Copa
1	172150006	172155006	1	172197522	172202522	.	.	.	.	0,0,0	78	28.7402	29.4262	26.1562	27.5664	14	14	14	14	0.0381449	0.0444927	0.0539207	0.0540063	NA,Dcaf8,Dcaf8,Dcaf8	NA,Pea15a,Pea15a,Pea15a
1	185545561	185550561	1	185674446	185679446	.	.	.	.	0,0,0	96	14.6749	16.0958	15.8212	14.3612	11	12	12	11	5.53943e-09	2.8171e-06	3.96515e-06	6.24829e-09	NA,Mir297c	NA
1	190944954	190949954	1	191066775	191071775	.	.	.	.	0,0,0	80	18.9735	15.5903	19.8443	15.0455	12	12	13	11	3.0288e-06	2.8171e-06	0.000899735	6.24829e-09	NA	NA,Tatdn3,Nsl1,Tatdn3,Tatdn3,Tatdn3
1	191989935	191994935	1	192074986	192079986	.	.	.	.	0,0,0	110	1.66405	12.1109	30.0362	15.0772	2	10	14	11	0	2.81e-12	0.0539207	6.24829e-09	NA,Mir3473c,Rd3	NA
1	13050014	13055014	1	13130987	13135987	.	.	.	.	0,0,0	82	18.5723	16.2624	17.6757	15.7781	12	12	12	12	1.5342e-05	1.46372e-05	2.00658e-05	1.99038e-05	NA	NA,Prdm14
1	13786865	13791865	1	14726240	14731240	.	.	.	.	0,0,0	56	5.96388	5.11228	9.2574	4.69331	7	7	9	6	4.86966e-21	2.99972e-21	4.40789e-14	4.94273e-25	NA,Gm5523	NA
1	55002978	55007978	1	55074503	55079503	.	.	.	.	0,0,0	56	11.8456	10.2798	9.58013	11.6483	10	10	9	10	5.21164e-11	3.60598e-11	4.40789e-14	6.18407e-11	NA	NA,Hspd1,Hspe1,Hspd1
1	65036282	65041282	1	65176250	65181250	.	.	.	.	0,0,0	62	16.5412	14.4466	12.5536	20.9482	12	11	11	13	1.5342e-05	3.43239e-08	5.00458e-08	0.00286254	NA,Akr1cl,Akr1cl,Cryge	NA,Pikfyve,Idh1,Idh1,Pikfyve
1	71055023	71060023	1	71090044	71095044	.	.	.	.	0,0,0	52	9.74776	12.8089	22.1029	2.48833	9	11	13	3	3.80807e-14	3.43239e-08	0.00288377	1.64323e-37	NA	NA,Bard1
1	72873330	72878330	1	73267774	73272774	.	.	.	.	0,0,0	72	12.7006	9.28499	17.7526	7.43019	11	9	12	8	4.42902e-08	2.36833e-14	2.00658e-05	1.5647e-17	NA,Igfbp5	NA
1	89464992	89469992	1	89513326	89518326	.	.	.	.	0,0,0	90	20.7612	17.3942	22.497	16.3416	13	12	13	12	0.00199232	1.46372e-05	0.00288377	1.99038e-05	NA,Agap1,Agap1	NA
1	91800047	91805047	1	91865018	91870018	.	.	.	.	0,0,0	76	20.2171	20.1945	18.3523	21.7025	13	13	12	13	0.00199232	0.0022036	2.00658e-05	0.00286254	NA,Twist2	NA
1	92470012	92475012	1	92605019	92610019	.	.	.	.	0,0,0	54	17.9029	14.6084	14.3367	20.3708	12	11	11	13	1.5342e-05	3.43239e-08	5.00458e-08	0.00286254	NA,Mir6900,Olfr1416,Ndufa10	NA,Olfr1411,Olfr1410,Olfr12
1	120590762	120595762	1	121178458	121183458	.	.	.	.	0,0,0	84	9.54374	10.2059	16.7757	15.2548	9	10	12	11	3.80807e-14	3.60598e-11	2.00658e-05	5.00031e-08	NA,En1	NA
1	132370814	132375814	1	132478338	132483338	.	.	.	.	0,0,0	74	13.2279	12.1543	17.3399	11.2044	11	10	12	10	4.42902e-08	3.60598e-11	2.00658e-05	6.18407e-11	NA,Tmcc2	NA,Rbbp5,Rbbp5,Rbbp5
1	143695004	143700004	1	143769960	143774960	.	.	.	.	0,0,0	48	9.34245	11.268	16.1569	10.5347	9	10	12	10	3.80807e-14	3.60598e-11	2.00658e-05	6.18407e-11	NA,Cdc73	NA,Uchl5,Trove2,Uchl5
1	166002998	166007998	1	166147988	166152988	.	.	.	.	0,0,0	102	16.9692	13.984	12.0378	21.9449	12	11	10	13	1.5342e-05	3.43239e-08	6.21745e-11	0.00286254	NA,Pou2f1,Pou2f1	NA
1	191915033	191920033	1	191958349	191963349	.	.	.	.	0,0,0	78	17.393	15.9441	20.2961	17.7659	12	12	13	12	1.5342e-05	1.46372e-05	0.00288377	1.99038e-05	NA,Slc30a1,1700034H15Rik	NA
1	191972528	191977528	1	192062551	192067551	.	.	.	.	0,0,0	110	4.88386	18.6838	24.0828	23.6931	6	12	13	13	6.39292e-25	1.46372e-05	0.00288377	0.00286254	NA,Rd3,Rd3,Rd3	NA
1	192186674	192191674	1	192595004	192600004	.	.	.	.	0,0,0	92	12.2953	15.5306	19.5693	15.6104	10	11	13	12	5.21164e-11	3.43239e-08	0.00288377	1.99038e-05	NA,Kcnh1,Kcnh1	NA
1	9560811	9565811	1	9696658	9701658	.	.	.	.	0,0,0	52	14.5395	12.4472	14.5664	13.6682	11	11	11	11	3.21072e-07	2.53231e-07	3.66383e-07	3.63184e-07	NA	NA,Mybl1,Mybl1
1	14741868	14746868	1	14860625	14865625	.	.	.	.	0,0,0	50	12.0046	10.4038	12.6007	13.3813	10	10	11	11	5.92034e-10	4.20719e-10	3.66383e-07	3.63184e-07	NA,Msc,Msc	NA
1	43264993	43269993	1	43739993	43744993	.	.	.	.	0,0,0	46	19.7446	13.1569	12.5813	19.0867	13	11	11	12	0.0057497	2.53231e-07	3.66383e-07	9.20132e-05	NA	NA,1500015O10Rik
1	53054979	53059979	1	53268750	53273750	.	.	.	.	0,0,0	46	8.91848	8.98711	11.375	10.5415	9	9	10	10	6.711e-13	4.39556e-13	7.13249e-10	7.06485e-10	NA,Mstn	NA
1	57775820	57780820	1	57949130	57954130	.	.	.	.	0,0,0	52	13.6855	13.9026	14.7316	12.9498	11	11	11	11	3.21072e-07	2.53231e-07	3.66383e-07	3.63184e-07	NA,Spats2l	NA
1	69239992	69244992	1	69687500	69692500	.	.	.	.	0,0,0	82	7.75747	9.12504	11.9893	11.0995	8	9	10	10	3.93093e-16	4.39556e-13	7.13249e-10	7.06485e-10	NA	NA,Ikzf2
1	134117498	134122498	1	134324959	134329959	.	.	.	.	0,0,0	102	17.4745	11.1471	11.4692	19.9539	12	10	10	13	7.0485e-05	4.20719e-10	7.13249e-10	0.00826849	NA,Chit1,Chit1,Chit1	NA,Ppfia4
1	138831039	138836039	1	139156996	139161996	.	.	.	.	0,0,0	58	9.97258	9.16769	11.8187	9.06943	10	9	10	9	5.92034e-10	4.39556e-13	7.13249e-10	7.83931e-13	NA,Lhx9,Lhx9,Lhx9	NA
1	153747538	153752538	1	153802506	153807506	.	.	.	.	0,0,0	46	17.8498	16.8355	16.1396	16.3177	12	12	12	12	7.0485e-05	6.90113e-05	9.24471e-05	9.20132e-05	NA,Rnasel,C230024C17Rik,Rgs16	NA
1	158952506	158957506	1	159133323	159138323	.	.	.	.	0,0,0	72	15.131	12.5147	12.5939	14.9562	11	11	11	11	3.21072e-07	2.53231e-07	3.66383e-07	3.63184e-07	NA,Pappa2	NA
1	164057023	164062023	1	164139991	164144991	.	.	.	.	0,0,0	64	13.5574	14.5999	15.3818	17.1989	11	11	11	12	3.21072e-07	2.53231e-07	3.66383e-07	9.20132e-05	NA,Sell,Sell,Sele	NA,Gm16548,F5
1	165247490	165252490	1	165319996	165324996	.	.	.	.	0,0,0	56	15.8486	15.6147	19.7199	16.9068	12	12	13	12	7.0485e-05	6.90113e-05	0.00827338	9.20132e-05	NA,Tiprl,Tiprl,Tiprl	NA
1	171116678	171121678	1	171258303	171263303	.	.	.	.	0,0,0	88	19.9025	13.0789	24.0089	9.89276	13	11	13	10	0.0057497	2.53231e-07	0.00827338	7.06485e-10	NA,Cfap126	NA,Ndufs2,Adamts4,B4galt3
1	180587498	180592498	1	180674987	180679987	.	.	.	.	0,0,0	62	15.8009	17.0997	20.1916	18.4701	12	12	13	12	7.0485e-05	6.90113e-05	0.00827338	9.20132e-05	NA,Mir6904	NA
1	182662498	182667498	1	182764960	182769960	.	.	.	.	0,0,0	50	20.9746	21.9532	22.8443	21.3507	13	13	13	13	0.0057497	0.00644834	0.00827338	0.00826849	NA	NA,Susd4,Susd4,Susd4,Susd4,Susd4
1	193254988	193259988	1	193377210	193382210	.	.	.	.	0,0,0	58	12.1263	10.4548	12.1943	10.1518	10	10	10	10	5.92034e-10	4.20719e-10	7.13249e-10	7.06485e-10	NA,Hsd11b1	NA,Camk1g
1	4786709	4791709	1	4853342	4858342	.	.	.	.	0,0,0	48	13.8508	13.0901	15.7703	15.2336	11	11	12	11	2.12549e-06	1.73377e-06	0.000389273	2.40808e-06	NA,Mrpl15,Mrpl15,Mrpl15	NA,Tcea1,Tcea1,Tcea1
1	16105001	16110001	1	16227477	16232477	.	.	.	.	0,0,0	66	19.3771	16.2237	23.061	12.4765	12	12	13	11	0.000293111	0.000295744	0.0217121	2.40808e-06	NA,Rdh10,Rpl7,4930444P10Rik,4930444P10Rik	NA
1	39003448	39008448	1	39521529	39526529	.	.	.	.	0,0,0	72	8.25527	5.61386	7.79698	6.46662	9	7	8	8	1.04641e-11	5.64122e-18	1.36988e-14	1.16001e-14	NA	NA,Cnot11
1	39757540	39762540	1	39899965	39904965	.	.	.	.	0,0,0	44	9.13969	11.2317	13.1752	11.5054	9	10	11	10	1.04641e-11	4.50454e-09	2.44656e-06	7.19305e-09	NA	NA,Map4k4,Map4k4,Map4k4,Map4k4
1	55237513	55242513	1	55379995	55384995	.	.	.	.	0,0,0	58	11.0064	9.14308	11.2669	10.7636	10	9	10	10	6.12642e-09	7.31256e-12	7.20291e-09	7.19305e-09	NA,Mars2,Rftn2,Rftn2,Rftn2	NA
1	57430704	57435704	1	57772864	57777864	.	.	.	.	0,0,0	48	8.05948	7.45613	8.62679	9.68517	9	8	9	9	1.04641e-11	7.00856e-15	1.26888e-11	1.27803e-11	NA	NA,Spats2l
1	61374292	61379292	1	61768563	61773563	.	.	.	.	0,0,0	90	7.4088	6.90307	8.01591	9.91968	8	8	9	10	1.02635e-14	7.00856e-15	1.26888e-11	7.19305e-09	NA,9530026F06Rik	NA
1	73989995	73994995	1	74121672	74126672	.	.	.	.	0,0,0	66	17.5988	16.6813	19.4527	20.5678	12	12	12	13	0.000293111	0.000295744	0.000389273	0.0219071	NA	NA,Tns1,Tns1,Rufy4,Rufy4
1	88355009	88360009	1	88739980	88744980	.	.	.	.	0,0,0	86	19.4304	11.2574	18.1977	12.8268	12	10	12	11	0.000293111	4.50454e-09	0.000389273	2.40808e-06	NA	NA,Platr5
1	105662465	105667465	1	105712481	105717481	.	.	.	.	0,0,0	58	22.4829	22.2048	24.0881	22.5384	13	13	13	13	0.0152065	0.017148	0.0217121	0.0219071	NA,2310035C23Rik,Pign,2310035C23Rik	NA
1	152624988	152629988	1	152741676	152746676	.	.	.	.	0,0,0	46	15.4868	14.0889	13.6166	13.7926	11	11	11	11	2.12549e-06	1.73377e-06	2.44656e-06	2.40808e-06	NA,Rgl1	NA,Apobec4
1	152794960	152799960	1	152895027	152900027	.	.	.	.	0,0,0	62	18.5162	14.9296	21.9742	17.3359	12	11	13	12	0.000293111	1.73377e-06	0.0217121	0.000387596	NA,Ncf2	NA,Smg7,Smg7,Smg7,Smg7
1	170288748	170293748	1	170611251	170616251	.	.	.	.	0,0,0	76	13.5354	14	16.5215	14.4119	11	11	12	11	2.12549e-06	1.73377e-06	0.000389273	2.40808e-06	NA,Sh2d1b1,Sh2d1b1	NA
1	172524391	172529391	1	172628723	172633723	.	.	.	.	0,0,0	90	16.3757	14.6077	17.8122	21.5976	12	11	12	13	0.000293111	1.73377e-06	0.000389273	0.0219071	NA,Cfap45	NA,Dusp23
1	182558572	182563572	1	182966838	182971838	.	.	.	.	0,0,0	72	8.51255	7.76809	14.6505	7.63999	9	8	11	8	1.04641e-11	7.00856e-15	2.44656e-06	1.16001e-14	NA,Capn8,Capn8	NA,Tlr5
1	184820008	184825008	1	185189976	185194976	.	.	.	.	0,0,0	56	12.3525	10.241	12.1491	18.6173	10	10	10	12	6.12642e-09	4.50454e-09	7.20291e-09	0.000387596	NA,Marc1,Mir1981	NA,Rab3gap2
1	184847483	184852483	1	185192498	185197498	.	.	.	.	0,0,0	56	11.1814	11.7379	10.8531	23.1493	10	10	10	13	6.12642e-09	4.50454e-09	7.20291e-09	0.0219071	NA,Marc2	NA,Rab3gap2
1	191179011	191184011	1	191268019	191273019	.	.	.	.	0,0,0	62	14.4009	13.7514	15.1812	18.1029	11	11	11	12	2.12549e-06	1.73377e-06	2.44656e-06	0.000387596	NA,Atf3	NA
1	5914165	5919165	1	6130838	6135838	.	.	.	.	0,0,0	64	9.99694	8.281	7.67245	10.4375	10	9	8	10	5.7751e-08	1.10418e-10	2.965e-13	6.79432e-08	NA,Npbwr1	NA
1	20939987	20944987	1	21087532	21092532	.	.	.	.	0,0,0	50	15.5129	13.8006	18.2616	10.7073	11	11	12	10	1.24015e-05	1.04956e-05	0.00146086	6.79432e-08	NA,Efhc1	NA,Tram2
1	30950002	30955002	1	31148743	31153743	.	.	.	.	0,0,0	50	6.80919	6.35535	5.33556	7.08609	8	8	7	8	2.39267e-13	1.60872e-13	2.54126e-16	2.93953e-13	NA,Ptp4a1,Gm13363	NA
1	34003326	34008326	1	34163885	34168885	.	.	.	.	0,0,0	56	15.1907	12.5711	13.9966	17.4037	11	11	11	12	1.24015e-05	1.04956e-05	1.4655e-05	0.00144164	NA,Dst,Dst	NA,Dst
1	36370011	36375011	1	36437506	36442506	.	.	.	.	0,0,0	54	17.6218	19.8145	23.6142	22.1591	12	13	13	13	0.00109074	0.0411484	0.0516631	0.0521681	NA,Fer1l5,Kansl3,Kansl3	NA,Lman2l,Lman2l
1	53716237	53721237	1	53887503	53892503	.	.	.	.	0,0,0	50	9.93873	10.6936	14.5169	11.5901	10	10	11	10	5.7751e-08	4.42904e-08	1.4655e-05	6.79432e-08	NA,Dnah7a	NA
1	55403988	55408988	1	55739978	55744978	.	.	.	.	0,0,0	60	8.23117	7.64331	8.76653	10.4813	9	8	9	10	1.5496e-10	1.60872e-13	1.85316e-10	6.79432e-08	NA,Plcl1	NA
1	55402491	55407491	1	55870005	55875005	.	.	.	.	0,0,0	80	9.85153	8.19547	13.3657	9.53799	10	9	11	9	5.7751e-08	1.10418e-10	1.4655e-05	1.81045e-10	NA,Plcl1	NA
1	78716687	78721687	1	79680006	79685006	.	.	.	.	0,0,0	48	7.55866	9.31049	12.5925	8.74718	8	9	11	9	2.39267e-13	1.10418e-10	1.4655e-05	1.81045e-10	NA	NA,Ap1s3
1	79701234	79706234	1	79745029	79750029	.	.	.	.	0,0,0	42	8.93552	8.24876	18.4687	4.60207	9	9	12	6	1.5496e-10	1.10418e-10	0.00146086	1.40093e-19	NA	NA,Wdfy1,Wdfy1
1	85935002	85940002	1	86007980	86012980	.	.	.	.	0,0,0	84	18.3586	19.3357	19.2992	24.2818	12	12	12	13	0.00109074	0.00113134	0.00146086	0.0521681	NA,4933407L21Rik	NA,Spata3,Spata3,Spata3,Spata3
1	86370003	86375003	1	86405065	86410065	.	.	.	.	0,0,0	90	20.1516	21.8186	22.3381	22.3765	13	13	13	13	0.0365944	0.0411484	0.0516631	0.0521681	NA,C130036L24Rik,Ncl	NA
1	88356246	88361246	1	88709983	88714983	.	.	.	.	0,0,0	58	8.01674	13.2342	16.9641	15.3029	9	11	12	11	1.5496e-10	1.04956e-05	0.00146086	1.43615e-05	NA	NA,Arl4c
1	93029953	93034953	1	93065016	93070016	.	.	.	.	0,0,0	60	21.1976	24.3473	24.0623	21.4688	13	13	13	13	0.0365944	0.0411484	0.0516631	0.0521681	NA	NA,Kif1a
1	106422997	106427997	1	106722504	106727504	.	.	.	.	0,0,0	54	4.2291	6.35938	9.11538	6.78806	6	8	9	8	1.91837e-19	1.60872e-13	1.85316e-10	2.93953e-13	NA	NA,Bcl2,Bcl2
1	118330016	118335016	1	118481303	118486303	.	.	.	.	0,0,0	60	17.7095	17.335	24.4918	19.106	12	12	13	12	0.00109074	0.00113134	0.0516631	0.00144164	NA,Nifk	NA
1	118908737	118913737	1	119047478	119052478	.	.	.	.	0,0,0	58	14.8538	16.1551	15.485	18.3017	11	12	11	12	1.24015e-05	0.00113134	1.4655e-05	0.00144164	NA	NA,Gli2
1	125426025	125431025	1	125561988	125566988	.	.	.	.	0,0,0	54	15.5248	15.4099	13.191	19.6017	11	11	11	13	1.24015e-05	1.04956e-05	1.4655e-05	0.0521681	NA,Actr3,Actr3,Actr3	NA,Slc35f5,Slc35f5
1	132054999	132059999	1	132109952	132114952	.	.	.	.	0,0,0	72	16.5668	16.2767	20.777	18.9697	12	12	13	12	0.00109074	0.00113134	0.0516631	0.00144164	NA,Mfsd4a,Mfsd4a	NA
1	132118326	132123326	1	132238326	132243326	.	.	.	.	0,0,0	54	13.6964	12.8655	16.0411	19.3155	11	11	12	12	1.24015e-05	1.04956e-05	0.00146086	0.00144164	NA	NA,Lemd1,Lemd1,Lemd1
1	132160011	132165011	1	132356651	132361651	.	.	.	.	0,0,0	60	11.7108	11.0292	13.7177	13.6387	10	10	11	11	5.7751e-08	4.42904e-08	1.4655e-05	1.43615e-05	NA	NA,Tmcc2
1	143939999	143944999	1	143989994	143994994	.	.	.	.	0,0,0	42	10.5018	15.5454	24.4861	16.3577	10	11	13	12	5.7751e-08	1.04956e-05	0.0516631	0.00144164	NA	NA,Rgs2
1	151262483	151267483	1	151335013	151340013	.	.	.	.	0,0,0	48	17.5759	16.6272	17.5435	18.8483	12	12	12	12	0.00109074	0.00113134	0.00146086	0.00144164	NA	NA,Ivns1abp,Ivns1abp,Ivns1abp,Ivns1abp,Ivns1abp
1	153125051	153130051	1	153324982	153329982	.	.	.	.	0,0,0	60	9.49081	10.6417	10.2143	14.4395	9	10	10	11	1.5496e-10	4.42904e-08	6.6567e-08	1.43615e-05	NA	NA,Lamc1
1	161746663	161751663	1	161967502	161972502	.	.	.	.	0,0,0	58	8.30295	5.48159	6.50979	5.50901	9	7	8	7	1.5496e-10	2.07875e-16	2.965e-13	2.60304e-16	NA	NA,Pigc,Pigc,4930558K02Rik,4930558K02Rik
1	162359972	162364972	1	162544975	162549975	.	.	.	.	0,0,0	66	14.113	11.0297	23.2858	8.96165	11	10	13	9	1.24015e-05	4.42904e-08	0.0516631	1.81045e-10	NA	NA,Mettl13
1	162358330	162363330	1	162660001	162665001	.	.	.	.	0,0,0	72	13.3034	8.40083	12.9952	7.78739	11	9	11	8	1.24015e-05	1.10418e-10	1.4655e-05	2.93953e-13	NA	NA,Myocos
1	186179997	186184997	1	186712501	186717501	.	.	.	.	0,0,0	56	6.19751	6.54451	7.70345	9.57614	7	8	8	9	2.95718e-16	1.60872e-13	2.965e-13	1.81045e-10	NA	NA,Tgfb2,Tgfb2
1	194620015	194625015	1	194727498	194732498	.	.	.	.	0,0,0	68	13.6836	13.1902	16.7846	10.7068	11	11	12	10	1.24015e-05	1.04956e-05	0.00146086	6.79432e-08	NA,Plxna2	NA
1	30782847	30787847	1	30933575	30938575	.	.	.	.	0,0,0	46	10.8783	11.3241	11.0529	14.8954	10	10	10	11	4.90633e-07	3.88536e-07	5.593e-07	7.78082e-05	NA	NA,Ptp4a1,Gm13363
1	30868334	30873334	1	30939994	30944994	.	.	.	.	0,0,0	50	10.7124	11.4627	8.95655	11.9944	10	10	9	10	4.90633e-07	3.88536e-07	2.48184e-09	5.83388e-07	NA,Phf3	NA,Ptp4a1,Gm13363
1	36783345	36788345	1	37248329	37253329	.	.	.	.	0,0,0	56	6.91894	6.19715	6.41811	8.15419	8	7	8	9	5.12414e-12	6.55663e-15	6.27098e-12	2.43449e-09	NA,Zap70	NA
1	45824997	45829997	1	45924996	45929996	.	.	.	.	0,0,0	64	12.8172	13.9705	18.5704	13.5017	11	11	12	11	6.52467e-05	5.79125e-05	0.0048989	7.78082e-05	NA	NA,Slc40a1
1	78605010	78610010	1	78645018	78650018	.	.	.	.	0,0,0	78	17.4257	18.0317	16.9982	19.1823	12	12	12	12	0.00368742	0.00388347	0.0048989	0.0048709	NA	NA,Acsl3,Utp14b,Acsl3,Acsl3,Utp14b
[truncated: 7,683 more rows]

## Sheet: Hi-CHIR only
chr1	x1	x2	chr2	y1	y2	name	score	strand1	strand2	color	observed	expectedBL	expectedDonut	expectedH	expectedV	binBL	binDonut	binH	binV	fdrBL	fdrDonut	fdrH	fdrV	target1	target2
[truncated: 4,769 more rows]
