# Supplementary figures and images for: A β-catenin-driven switch in TCF/LEF transcription factor binding to DNA target sites promotes commitment of mammalian nephron progenitor cells
Source: eLife journal article supplement (doi:10.7554/elife.64444), 2021-02-15

Fig. 2S1

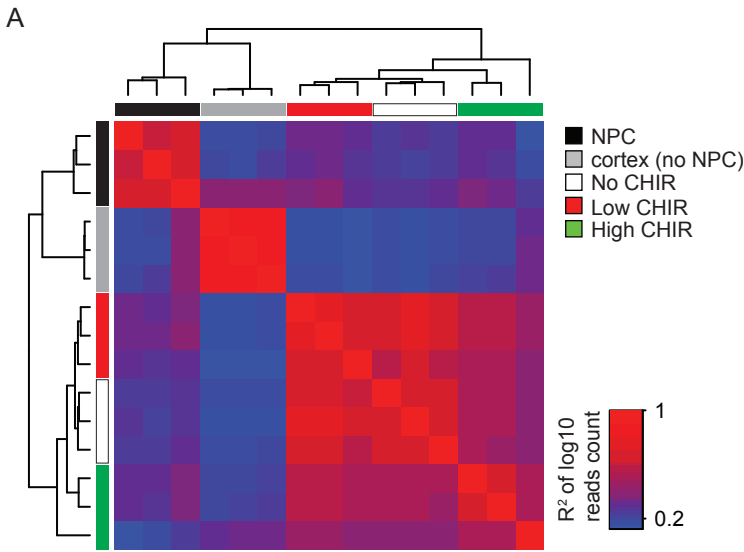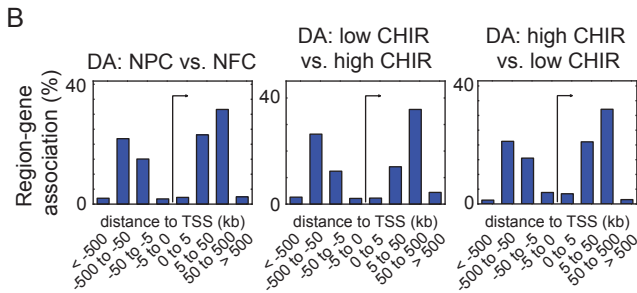

Supplement: supp [file elife_poa_e64444_Figure_2_figure_supplement_1.pdf › elife_poa_e64444_Figure_2_figure_supplement_1.pdf]

Fig. 3S1

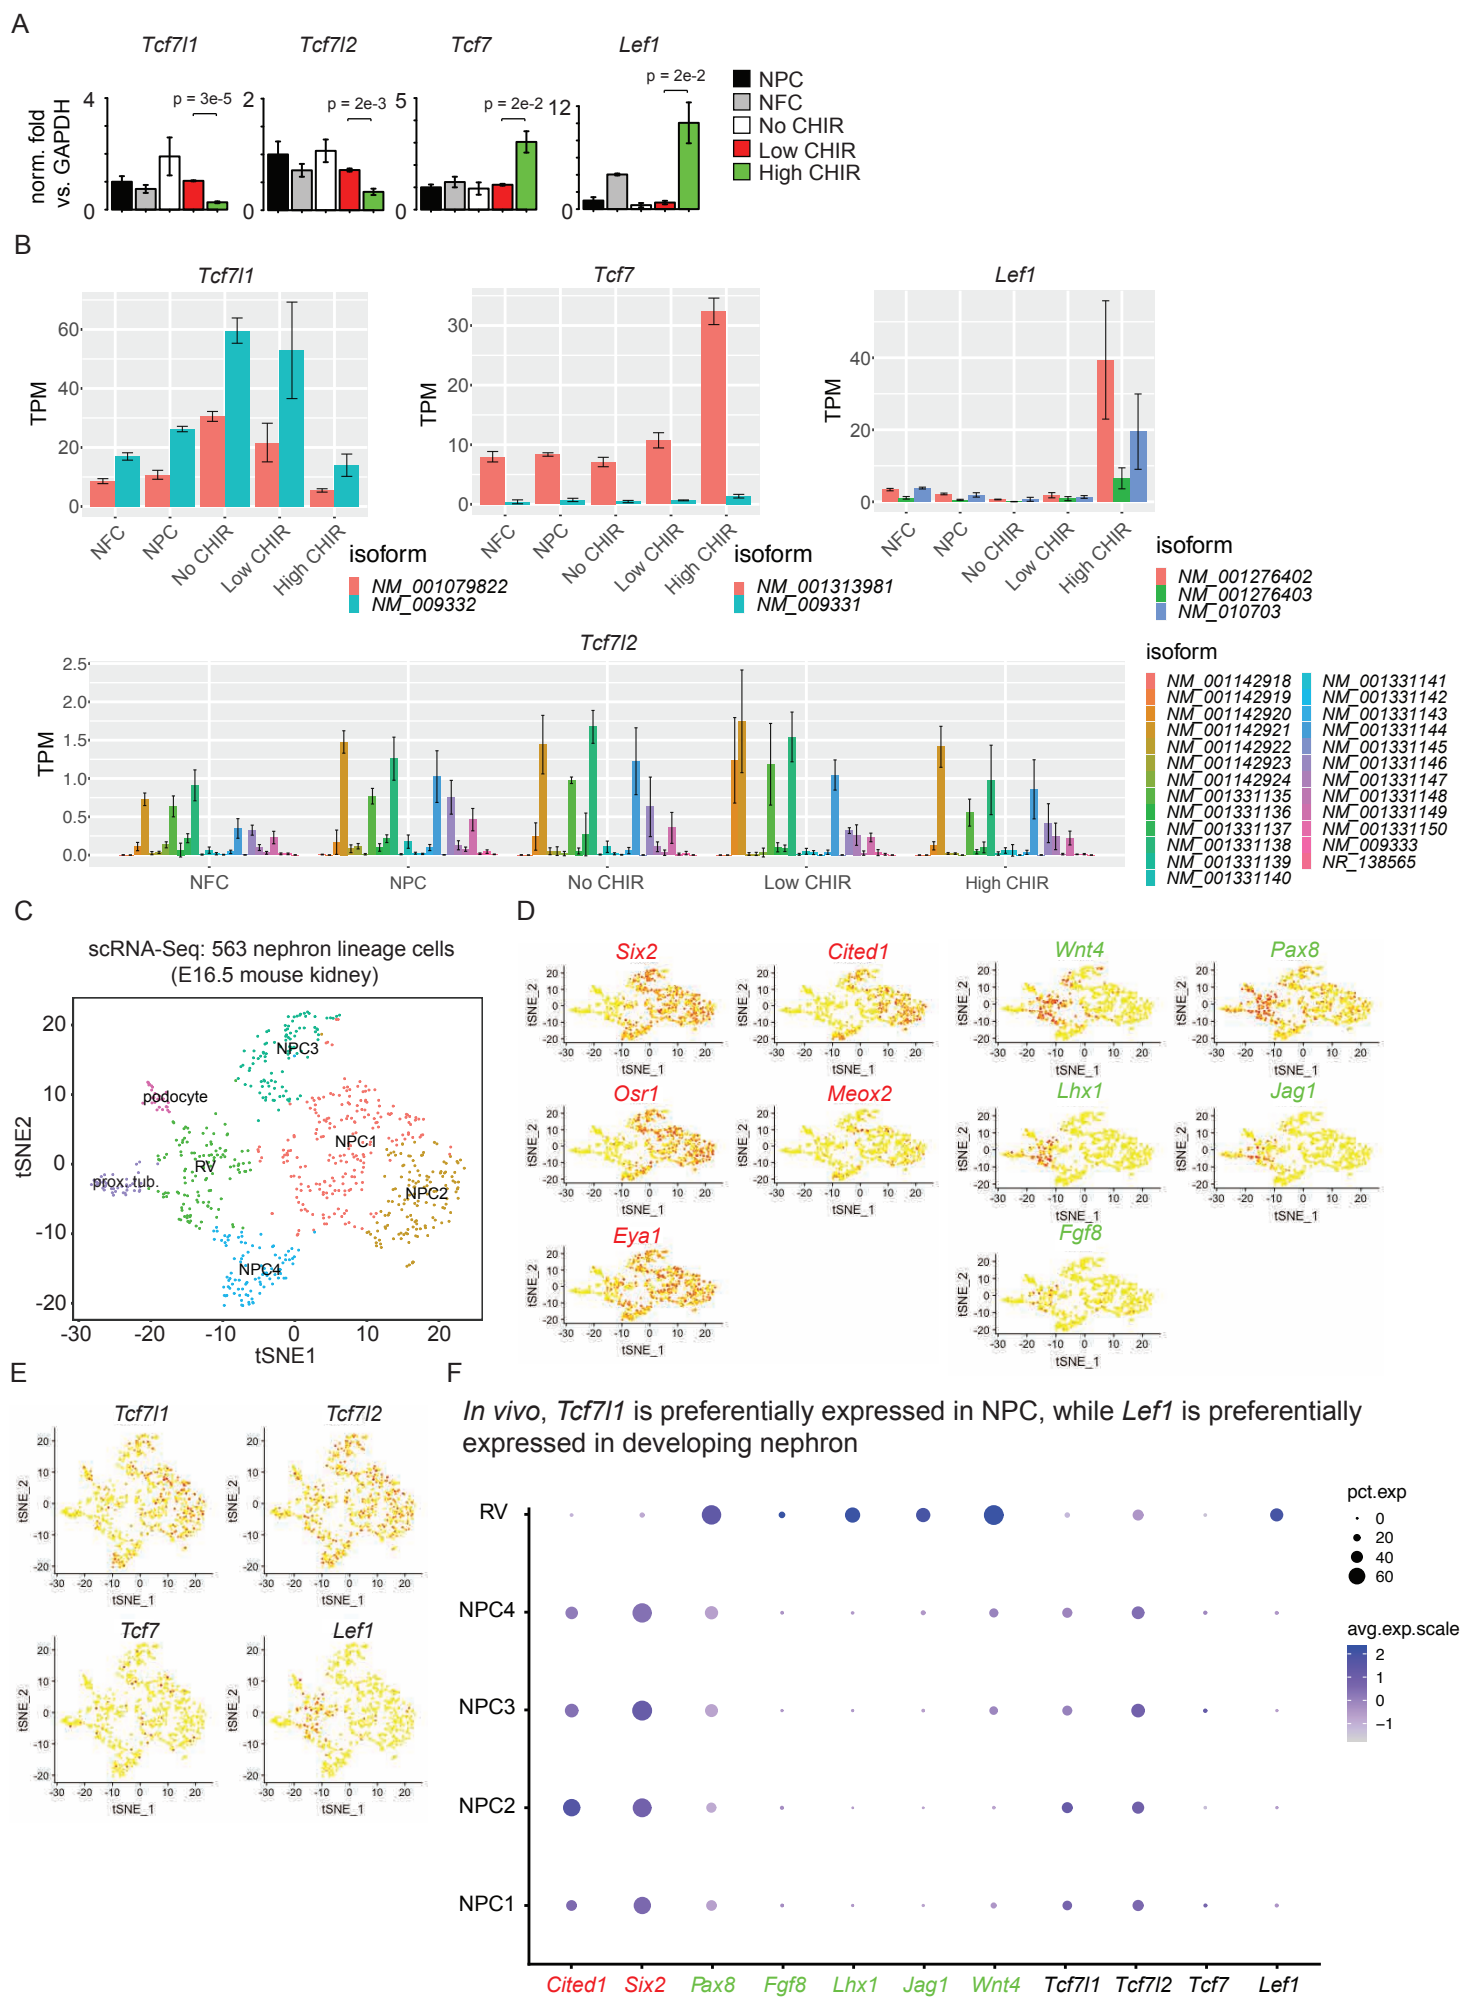

Supplement: supp [file elife_poa_e64444_Figure_3_figure_supplement_1.pdf › elife_poa_e64444_Figure_3_figure_supplement_1.pdf]

Fig. 2S2

A

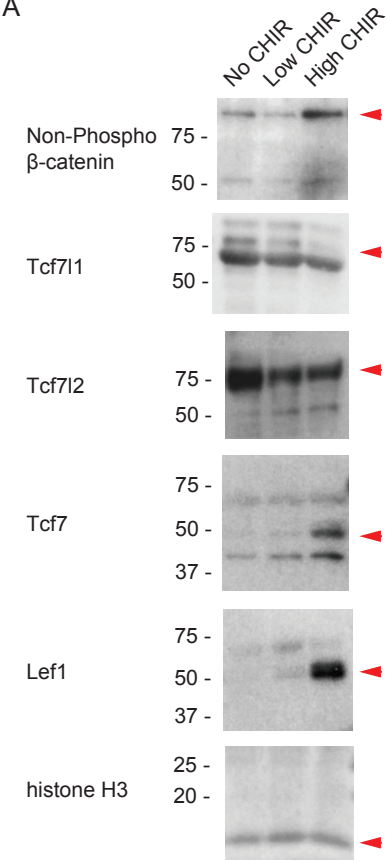

B

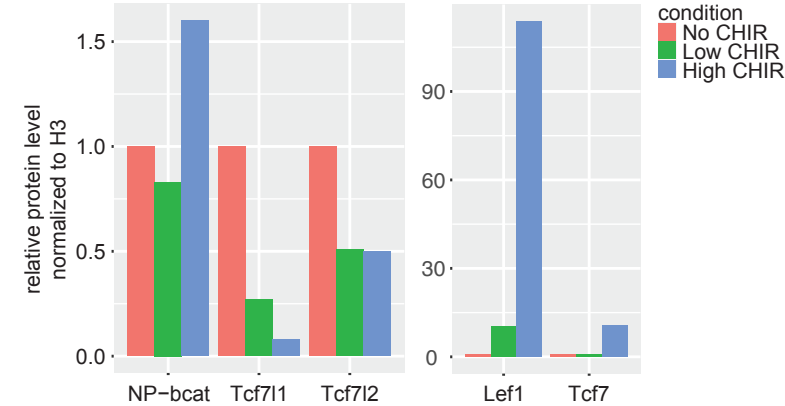

Supplement: supp [file elife_poa_e64444_Figure_3_figure_supplement_2.pdf › elife_poa_e64444_Figure_3_figure_supplement_2.pdf]

Fig. 4S1

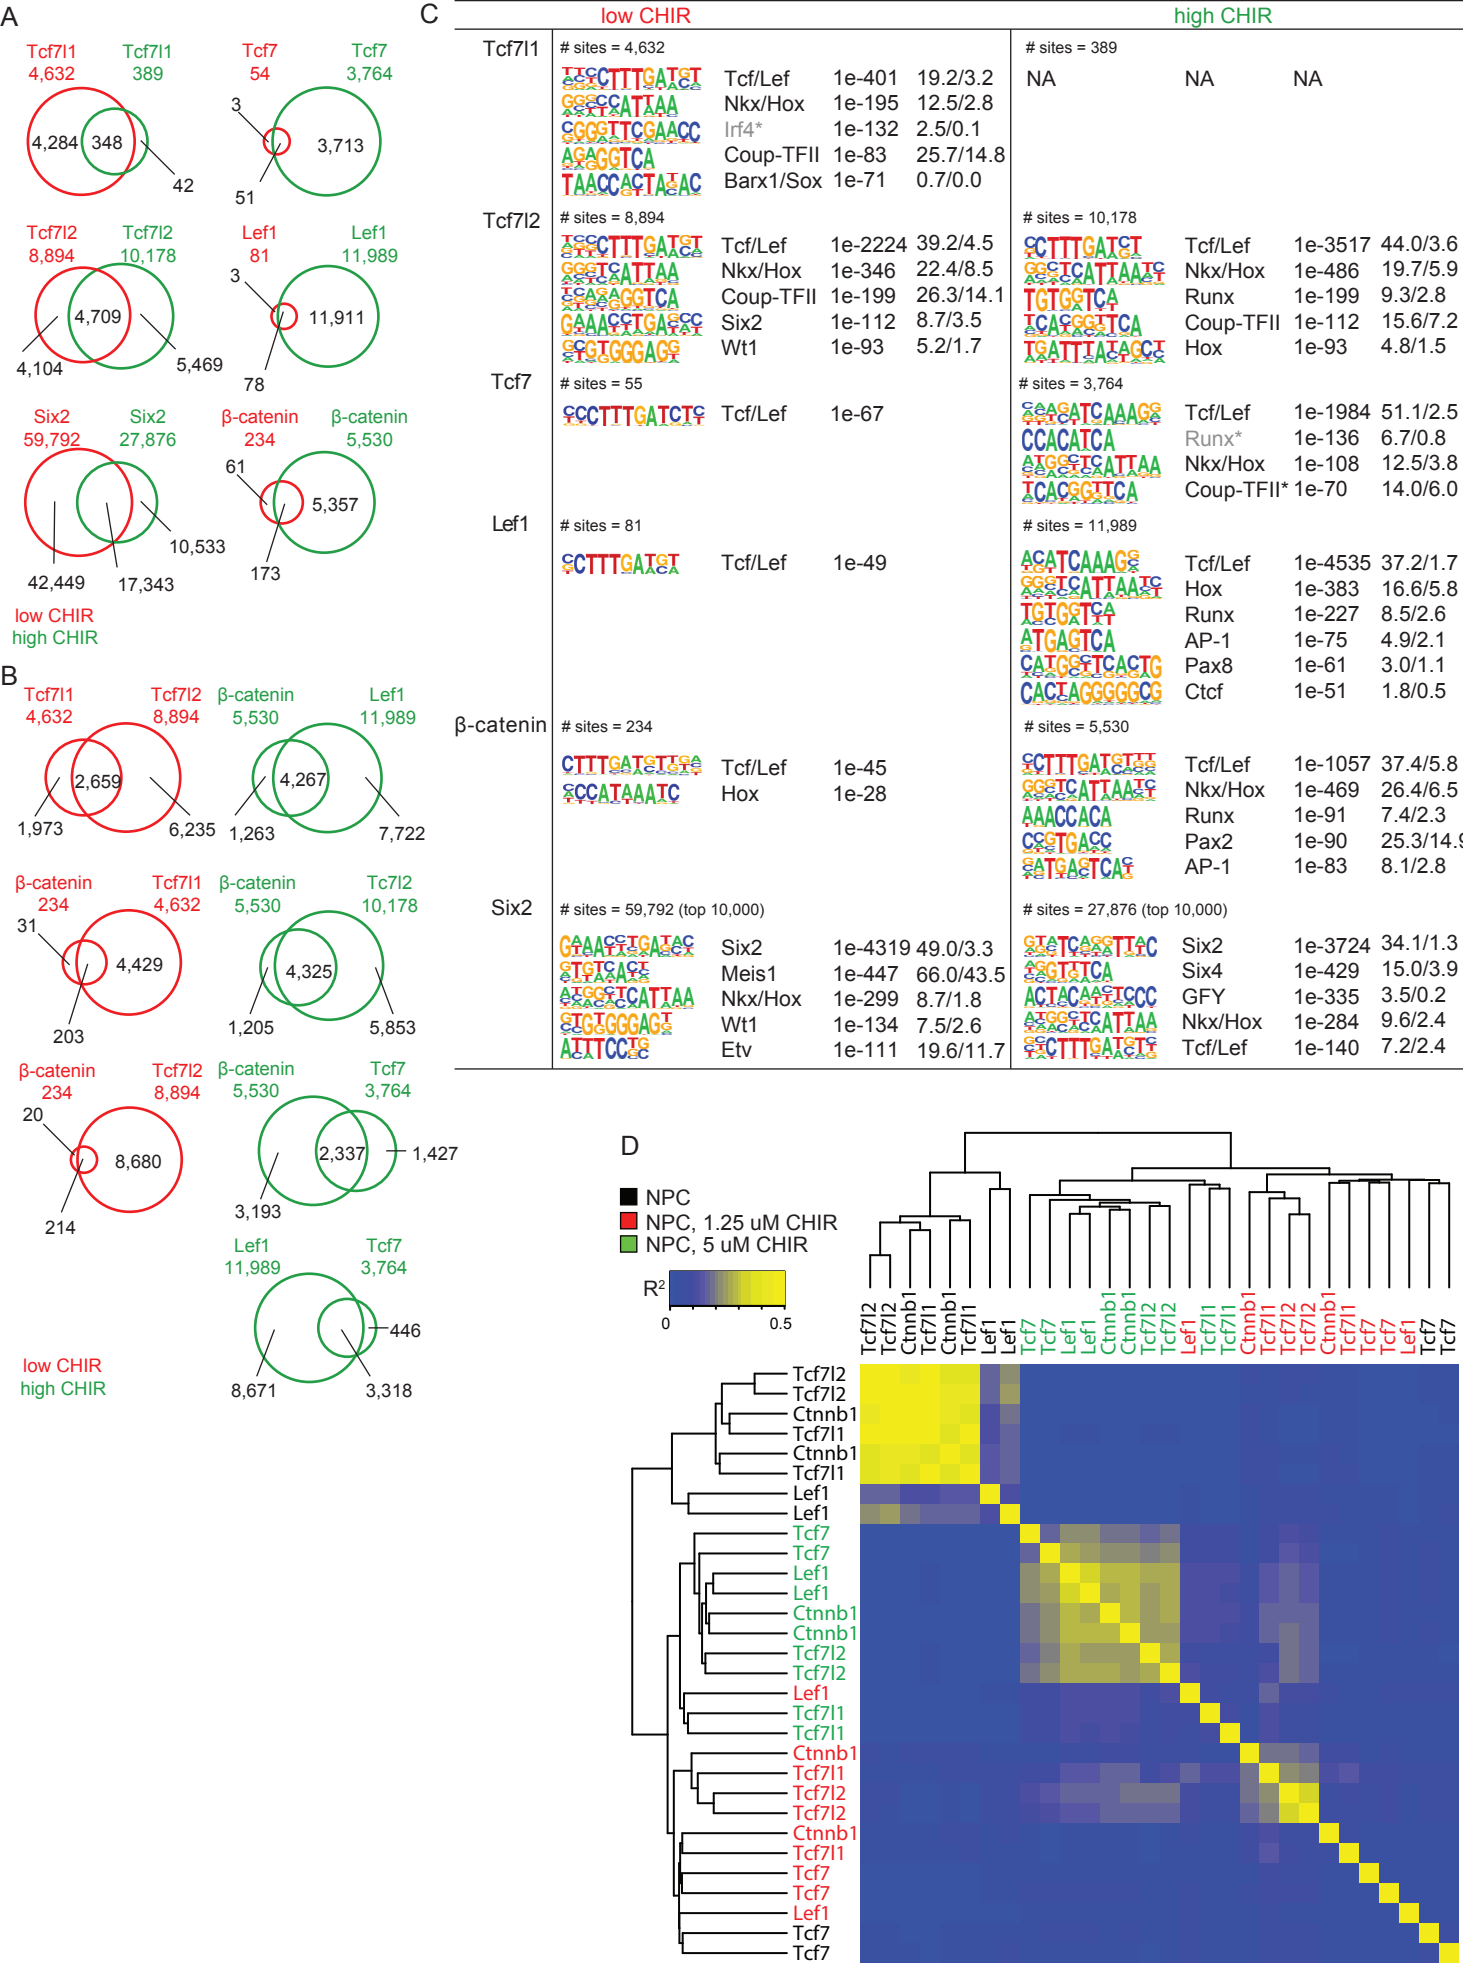

Supplement: supp [file elife_poa_e64444_Figure_4_figure_supplement_1.pdf › elife_poa_e64444_Figure_4_figure_supplement_1.pdf]

Fig. 4S2  
A

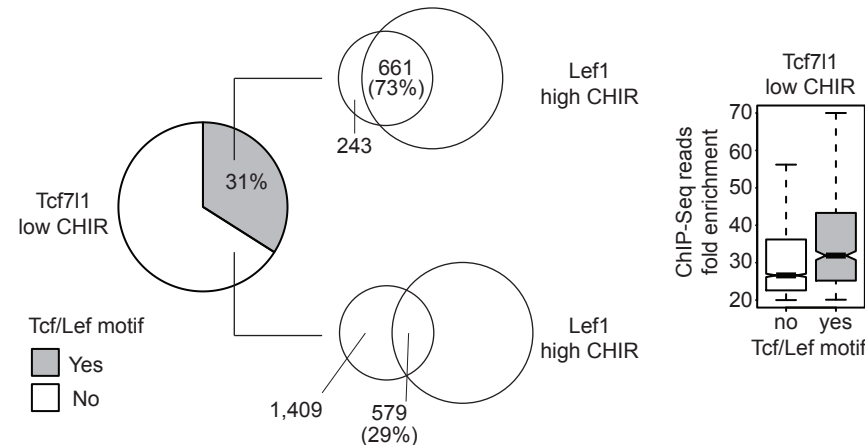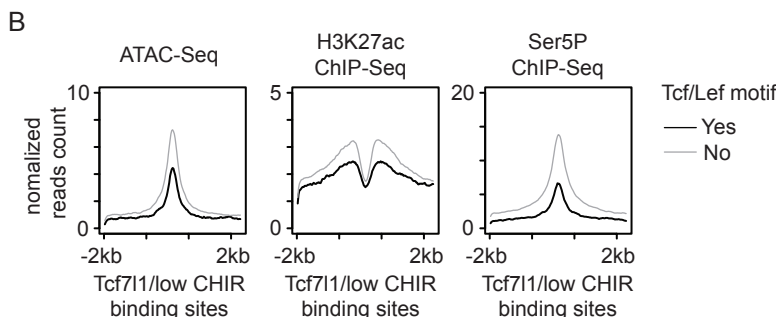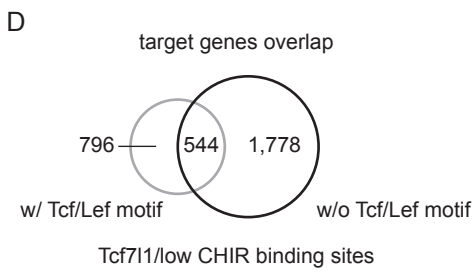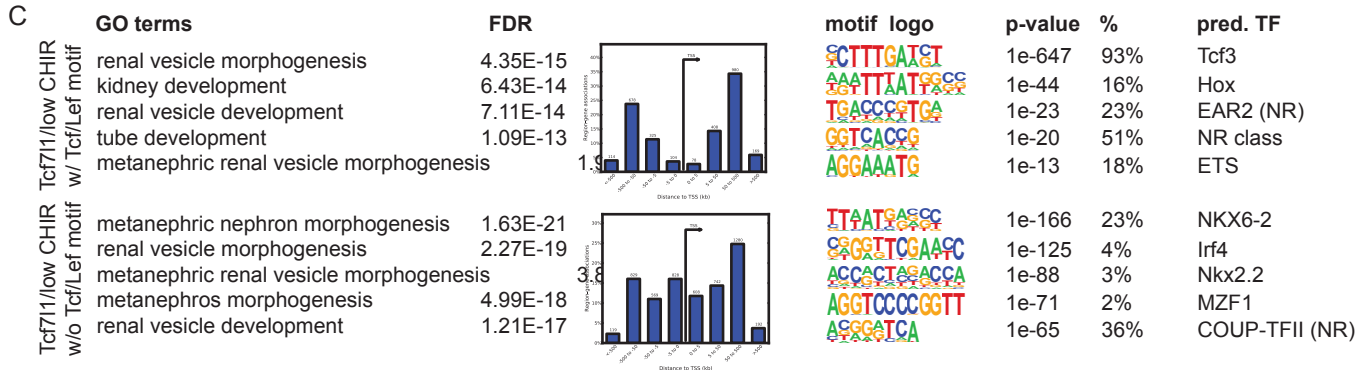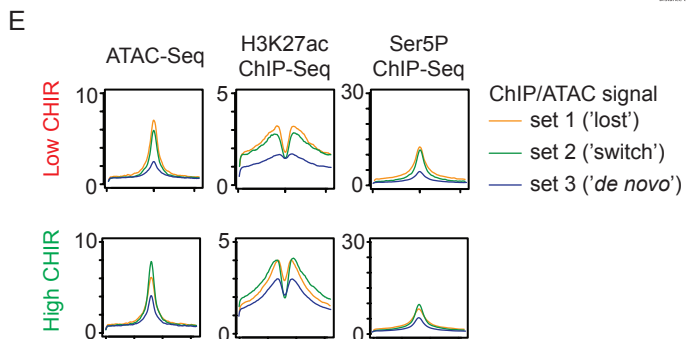

Supplement: supp [file elife_poa_e64444_Figure_4_figure_supplement_2.pdf › elife_poa_e64444_Figure_4_figure_supplement_2.pdf]

Fig. 4S3

A

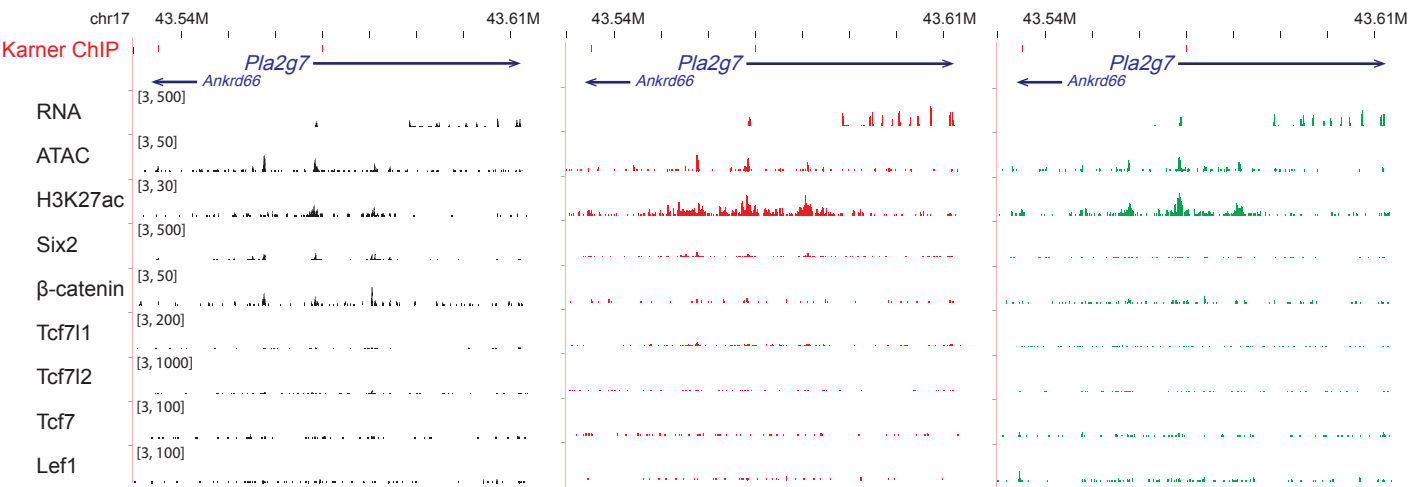

B

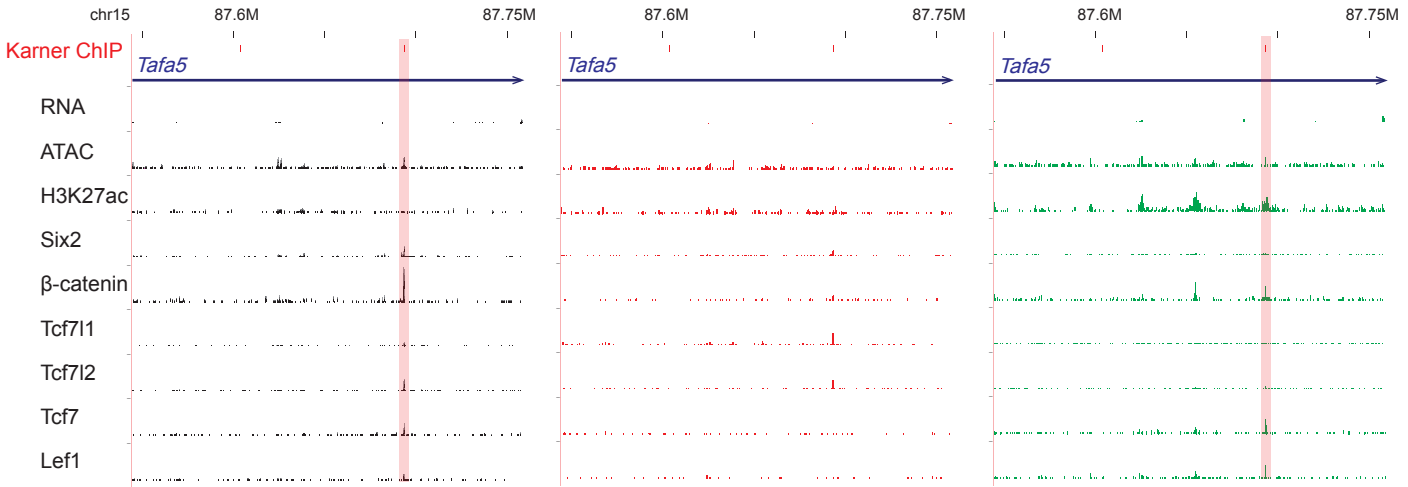

Supplement: supp [file elife_poa_e64444_Figure_4_figure_supplement_3.pdf › elife_poa_e64444_Figure_4_figure_supplement_3.pdf]

Fig. 5S1

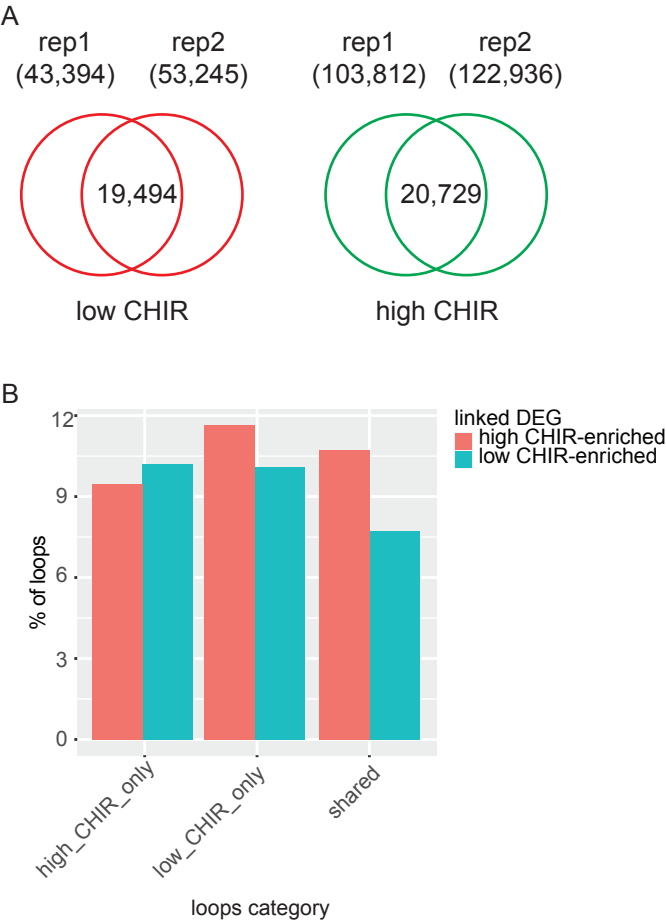

Supplement: supp [file elife_poa_e64444_Figure_5_figure_supplement_1.pdf › elife_poa_e64444_Figure_5_figure_supplement_1.pdf]
